# Supplementary material for: Altered expression of a quality control protease in E. coli reshapes the in vivo mutational landscape of a model enzyme
Source: eLife. 2020 Jul 23;9:e53476. doi: 10.7554/eLife.53476 (PMC7377907; doi:10.7554/eLife.53476)
Supplement: Figure 1—source data 1. — The location of the DHFR gene is listed in parenthesis in the first column. Expression values corresponds to the cell strain in the column heading. [file elife-53476-fig1-data1.xlsx]

## Sheet: Sheet1
	ER2566 (–Lon)
Variant	Molecules per cell	Std. dev
_wt (Chromosomal)	550	9.2
	ER2566 ∆folA/∆thyA (–Lon)				ER2566 ∆folA/∆thyA (+Lon)
Variant	Molecules per cell	St. dev.			Molecules per cell	St. dev.
_wt (SMT102)	240	33.5			633.5	272.6
_wt (SMT201)	330.5	17.2			820.5	406.7
_wt (SMT202)	262	5.5			258.4	24
_wt (SMT205)	52	9.2			71.4	23.9
