# Supplementary material for: Altered expression of a quality control protease in E. coli reshapes the in vivo mutational landscape of a model enzyme
Source: eLife. 2020 Jul 23;9:e53476. doi: 10.7554/eLife.53476 (PMC7377907; doi:10.7554/eLife.53476)
Supplement: Figure 1—source data 2. — For values listed as ND, no detectable change in OD was measured during a 30 hr growth period. [file elife-53476-fig1-data2.xlsx]

## Sheet: Sheet1
	Selection coeff.			Growth rate (hr-1)
Variant	Mean	St. dev.		Mean	St. dev.
_wt	0	0		0.22	0.01
W22H	-0.86	0.11		0.11	0.01
L28F	0.33	0.17		0.22	0.01
L28Y	0.23	0.34		0.18	0.02
W30M	0.93	0.25		0.25	0.04
F31V	-0.45	0.59		0.15	0.01
F31Y	-0.22	0.48		0.13	0.01
M42F	0.54	0.26		0.24	0.01
M42Y	0.47	0.35		0.23	0.01
L54F	0.03	0.47		0.22	0.01
L54I	-0.4	0.24		0.14	0.01
T113V	0.66	0.38		0.25	0.01
G121V	-1.68	0.57		0.03	0.02
F31Y_L54I	-2.47	0.33		ND	ND
F31Y_G121V	-1.97	0.33		ND	ND
M42F_G121V	-2.5	0.3		ND	ND
L54I_G121V	-2.94	0.5		ND	ND
