# Supplementary material for: Altered expression of a quality control protease in E. coli reshapes the in vivo mutational landscape of a model enzyme
Source: eLife. 2020 Jul 23;9:e53476. doi: 10.7554/eLife.53476 (PMC7377907; doi:10.7554/eLife.53476)
Supplement: Figure 1—source data 3. [file elife-53476-fig1-data3.xlsx]

## Sheet: Sheet1
Mutant	kcat (s-1)	Km (µM)	Reference
wt	7.95	1.1	Reynolds et al. Cell 2011
W22H	1.89	18	Reynolds et al. Cell 2011
L28F	18.5	9.9	This work
L28Y	19.2	21.2	This work
F31V	8.65	108	Reynolds et al. Cell 2011
F31Y	20.61	80	Reynolds et al. Cell 2011
M42F	79.2	13	Reynolds et al. Cell 2011
L54F	6.3	0.7	Huang et al. Biochemistry 1994
L54I	7.88	35	Reynolds et al. Cell 2011
T113V	32.9	21.4	Fierke and Benkovic Biochemistry 1989
G121V	0.3	6.1	Reynolds et al. Cell 2011
F31Y/L54I	1.94	168.3	Reynolds et al. Cell 2011
F31Y/G121V	0.13	90.6	Reynolds et al. Cell 2011
M42F/G121V	0.4	71.8	Reynolds et al. Cell 2011
L54I/G121V	0.22	73	Reynolds et al. Cell 2011
