# Supplementary material for: Altered expression of a quality control protease in E. coli reshapes the in vivo mutational landscape of a model enzyme
Source: eLife. 2020 Jul 23;9:e53476. doi: 10.7554/eLife.53476 (PMC7377907; doi:10.7554/eLife.53476)
Supplement: Figure 3—source data 1. [file elife-53476-fig3-data1.xlsx]

## Sheet: Sheet1
Pos.	–Lon	+Lon	>20% SASA
1	Intol.	Intol.	Bur.
2	Intol.	Intol.	Bur.
3	Dele.	Dele.	Bur.
4	Dele.	Dele.	Bur.
5	Dele.	Dele.	Bur.
6	Dele.	Dele.	Bur.
7	Dele.	Dele.	Bur.
8	Dele.	Dele.	Bur.
9	Dele.	Dele.	Bur.
10	Dele.	Dele.	Exp.
11	Mixed	Mixed	Exp.
12	Mixed	Mixed	Exp.
13	Dele.	Dele.	Bur.
14	Intol.	Dele.	Bur.
15	Intol.	Intol.	Bur.
16	Dele.	Dele.	Exp.
17	Dele.	Dele.	Exp.
18	Mixed	Dele.	Exp.
19	Mixed	Mixed	Exp.
20	Dele.	Dele.	Bur.
21	Dele.	Dele.	Bur.
22	Intol.	Intol.	Bur.
23	Mixed	Dele.	Exp.
24	Mixed	Mixed	Bur.
25	Mixed	Tol.	Exp.
26	Dele.	Dele.	Exp.
27	Intol.	Intol.	Bur.
28	Dele.	Dele.	Exp.
29	Dele.	Dele.	Exp.
30	Bene.	Mixed	Bur.
31	Dele.	Dele.	Exp.
32	Dele.	Dele.	Exp.
33	Mixed	Mixed	Exp.
34	Mixed	Dele.	Bur.
35	Intol.	Intol.	Bur.
36	Mixed	Mixed	Exp.
37	Mixed	Mixed	Exp.
38	Mixed	Dele.	Exp.
39	Mixed	Mixed	Bur.
40	Mixed	Dele.	Bur.
41	Dele.	Dele.	Bur.
42	Dele.	Dele.	Bur.
43	Intol.	Intol.	Bur.
44	Mixed	Mixed	Bur.
45	Mixed	Mixed	Exp.
46	Intol.	Intol.	Bur.
47	Bene.	Mixed	Bur.
48	Bene.	Bene.	Exp.
49	Dele.	Dele.	Bur.
50	Dele.	Dele.	Bur.
51	Mixed	Tol.	Exp.
52	Tol.	Bene.	Exp.
53	Mixed	Bene.	Exp.
54	Dele.	Dele.	Bur.
55	Tol.	Bene.	Exp.
56	Mixed	Tol.	Exp.
57	Intol.	Dele.	Bur.
58	Mixed	Tol.	Exp.
59	Mixed	Mixed	Bur.
60	Mixed	Dele.	Bur.
61	Dele.	Intol.	Bur.
62	Mixed	Dele.	Bur.
63	Mixed	Dele.	Bur.
64	Mixed	Bene.	Exp.
65	Mixed	Bene.	Exp.
66	Mixed	Mixed	Exp.
67	Mixed	Bene.	Exp.
68	Bene.	Bene.	Exp.
69	Mixed	Mixed	Bur.
70	Tol.	Bene.	Exp.
71	Mixed	Mixed	Exp.
72	Bene.	Mixed	Bur.
73	Mixed	Mixed	Exp.
74	Mixed	Dele.	Bur.
75	Mixed	Mixed	Bur.
76	Mixed	Mixed	Exp.
77	Bene.	Mixed	Exp.
78	Bene.	Mixed	Bur.
79	Mixed	Mixed	Exp.
80	Mixed	Mixed	Exp.
81	Dele.	Intol.	Bur.
82	Mixed	Dele.	Exp.
83	Tol.	Mixed	Exp.
84	Mixed	Mixed	Bur.
85	Bene.	Dele.	Bur.
86	Bene.	Tol.	Exp.
87	Tol.	Mixed	Exp.
88	Bene.	Tol.	Exp.
89	Mixed	Tol.	Exp.
90	Dele.	Dele.	Bur.
91	Mixed	Dele.	Bur.
92	Mixed	Dele.	Bur.
93	Dele.	Intol.	Bur.
94	Dele.	Intol.	Bur.
95	Intol.	Intol.	Bur.
96	Intol.	Intol.	Exp.
97	Dele.	Dele.	Bur.
98	Dele.	Dele.	Exp.
99	Dele.	Dele.	Bur.
100	Dele.	Dele.	Bur.
101	Mixed	Mixed	Exp.
102	Bene.	Dele.	Exp.
103	Mixed	Dele.	Bur.
104	Intol.	Intol.	Bur.
105	Tol.	Tol.	Exp.
106	Mixed	Mixed	Bur.
107	Intol.	Intol.	Bur.
108	Tol.	Mixed	Exp.
109	Mixed	Mixed	Bur.
110	Dele.	Intol.	Bur.
111	Mixed	Dele.	Bur.
112	Mixed	Intol.	Bur.
113	Intol.	Intol.	Bur.
114	Bene.	Mixed	Exp.
115	Mixed	Dele.	Bur.
116	Bene.	Mixed	Bur.
117	Dele.	Dele.	Bur.
118	Bene.	Dele.	Exp.
119	Mixed	Mixed	Bur.
120	Bene.	Mixed	Exp.
121	Dele.	Dele.	Bur.
122	Dele.	Dele.	Exp.
123	Dele.	Dele.	Exp.
124	Mixed	Mixed	Exp.
125	Dele.	Intol.	Bur.
126	Bene.	Dele.	Bur.
127	Bene.	Bene.	Exp.
128	Mixed	Dele.	Bur.
129	Bene.	Mixed	Exp.
130	Bene.	Tol.	Exp.
131	Mixed	Dele.	Exp.
132	Bene.	Mixed	Exp.
133	Dele.	Intol.	Bur.
134	Bene.	Tol.	Exp.
135	Bene.	Mixed	Exp.
136	Tol.	Tol.	Exp.
137	Bene.	Mixed	Exp.
138	Mixed	Mixed	Exp.
139	Tol.	Dele.	Exp.
140	Bene.	Mixed	Exp.
141	Mixed	Dele.	Exp.
142	Bene.	Tol.	Exp.
143	Tol.	Tol.	Exp.
144	Mixed	Dele.	Exp.
145	Tol.	Tol.	Exp.
146	Tol.	Mixed	Exp.
147	Dele.	Dele.	Bur.
148	Dele.	Dele.	Exp.
149	Dele.	Dele.	Exp.
150	Mixed	Dele.	Exp.
151	Mixed	Dele.	Bur.
152	Bene.	Mixed	Bur.
153	Mixed	Dele.	Bur.
154	Bene.	Mixed	Bur.
155	Mixed	Dele.	Bur.
156	Mixed	Dele.	Bur.
157	Mixed	Mixed	Exp.
158	Tol.	Dele.	Exp.
159	Bene.	Tol.	Exp.
