# Supplementary material for: Altered expression of a quality control protease in E. coli reshapes the in vivo mutational landscape of a model enzyme
Source: eLife. 2020 Jul 23;9:e53476. doi: 10.7554/eLife.53476 (PMC7377907; doi:10.7554/eLife.53476)
Supplement: Figure 4—source data 1. [file elife-53476-fig4-data1.xlsx]

## Sheet: Sheet1
	5 mM DHF			10 mM DHF			20 mM DHF			30 mM DHF
Variant	Velocity	St. dev.		Velocity	St. dev.		Velocity	St. dev.		Velocity	St. dev.
_wt	2.42	0.75		3.88	0.75		5.12	0.74		5.48	0.37
L24V	2.85	1.05		5.37	1.43		9.01	1.64		10.79	0.86
W30F	2.02	0.37		3.79	0.96		6.77	1.56		8.5	1.94
W30M	2.05	0.98		4.45	1.46		7.73	2.53		10.27	3.03
I41A	1.64	0.52		3.05	0.81		4.69	1.11		4.88	1.06
I41V	2.52	1.71		3.77	2.27		5.11	2.44		5.13	1.96
M42F	3.08	1.4		4.62	1.68		6.42	1.24		6.9	0.64
M42Y	4.45	1.18		7.69	1.41		12.51	1.43		15.16	1.32
H45S	1.26	0.19		2.29	0.21		3.79	0.38		4.73	0.74
W47L	1.06	0.35		1.85	0.44		2.81	0.35		3.62	0.32
W47V	0.74	0.45		1.27	0.68		2.28	0.79		2.9	0.37
L62A	1.03	0.61		1.41	0.71		2.46	1		2.3	1.22
L62V	1.74	0.64		2.61	0.64		3.29	0.62		3.6	0.26
C85L	1.56	0.49		2.92	0.63		4.71	0.09		5.77	0.52
I91A	3.17	0.64		5.32	0.6		8.08	0.59		8.94	0.49
I91G	2.38	0.55		4.33	1.2		7.46	1.46		9.22	1.95
R98Y	1.38	0.68		2.38	0.97		3.83	0.97		4.43	0.53
Q102L	0.84	0.31		1.52	0.43		2.52	0.57		2.77	0.26
Q102W	0.72	0.28		1.27	0.38		1.81	0.61		2.29	0.35
T113V	0.51	0.05		1.19	0.09		2.58	0.04		4.38	0.08
H114V	2.61	1.09		4.12	1.28		5.62	1.08		6.57	1.06
D116I	3.59	1.17		5.37	1.34		7.01	0.95		8.18	0.87
D116M	3.87	1.33		5.66	1.5		7.4	1.21		7.83	0.8
E154V	2.71	0.6		4.66	1.18		7.73	1.82		9.5	2.02
L156Y	3.8	1.66		5.7	1.94		7.43	1.41		7.64	0.82
