# Supplementary material for: Altered expression of a quality control protease in E. coli reshapes the in vivo mutational landscape of a model enzyme
Source: eLife. 2020 Jul 23;9:e53476. doi: 10.7554/eLife.53476 (PMC7377907; doi:10.7554/eLife.53476)
Supplement: Figure 4—source data 2. — All values are for the SMT205 plasmid transformed into the cell strain in the column heading. NM, not measured. [file elife-53476-fig4-data2.xlsx]

## Sheet: Sheet1
	ER2566 ∆folA/∆thyA (–Lon)				ER2566 ∆folA/∆thyA (+Lon)
Variant	Molecules per cell	St. dev.			Molecules per cell	St. dev.
_wt	52	9.2			71.4	23.9
L24V	83.6	6.8			65.5	13.4
W30F	81.3	2.7			79	9.3
W30M	76.9	0.3			63.7	11
I41A	65.6	5.9			9.2	8.4
I41V	177.5	72.8			218.9	108.5
M42F	1199.1	17.6			290.6	5.9
M42Y	360.9	2.6			162.3	4.9
H45S	101.9	10.1			69.6	13.8
W47L	558.3	94.5			349.2	46.7
W47V	NM	NM			NM	NM
L62A	NM	NM			NM	NM
L62V	112	9.4			104.7	15.3
C85L	67.2	11.6			63.6	2.6
I91A	98.5	3.8			56	14.5
I91G	110.7	12.8			86.8	20.7
R98Y	166.1	16.2			161.5	29.4
Q102L	239.5	27			198.4	57.5
Q102W	194.9	42.4			133.1	42.1
T113V	418.3	19.1			212.2	27.5
H114V	NM	NM			NM	NM
D116I	NM	NM			NM	NM
D116M	49.8	4.4			46.5	7
E154V	37	5.1			36.2	0.8
L156Y	47.3	3.1			44.8	6.6
