# Supplementary material for: Altered expression of a quality control protease in E. coli reshapes the in vivo mutational landscape of a model enzyme
Source: eLife. 2020 Jul 23;9:e53476. doi: 10.7554/eLife.53476 (PMC7377907; doi:10.7554/eLife.53476)
Supplement: Figure 4—source data 3. [file elife-53476-fig4-data3.xlsx]

## Sheet: Sheet1
Mutant	Tm [deg C]	∆selection coefficient
_wt	57.4	0
L24V	54.8	0.72
W30F	48.7	-0.15
W30M	48.4	-0.37
I41A	39	-1.24
I41V	53.3	-0.07
M42F	47.9	-0.16
M42Y	44.2	-0.1
H45S	55.1	-0.33
W47L	50.6	-0.2
W47V	41.9	-1.46
L62A	42	-1.35
L62V	53.3	-0.21
C85L	42.4	-0.78
I91A	55.2	-0.6
I91G	49.8	-0.9
R98Y	54.8	-0.47
Q102L	57	-0.3
Q102W	52.8	-0.69
T113V	52.5	-0.82
H114V	47.3	-0.66
D116I	50.3	-0.34
D116M	50.6	-0.72
E154V	53.9	-0.9
L156Y	47.8	-0.65
