# Supplementary material for: Altered expression of a quality control protease in E. coli reshapes the in vivo mutational landscape of a model enzyme
Source: eLife. 2020 Jul 23;9:e53476. doi: 10.7554/eLife.53476 (PMC7377907; doi:10.7554/eLife.53476)
Supplement: Supplementary file 1. — Values are reported as calculated, but based on the selection calibration, differences between selection coefficients with values below ~–2.5 are not interpretable. [file elife-53476-supp1.csv]

#Mutant	-Lon selection coefficient	standard deviation	standard error
W47L	1.624326	0.123687	0.089273
L24V	1.304508	0.277945	0.158621
R44N	1.251744	0.032646	0.072964
W47M	1.244016	0.112837	0.072584
A6T	1.223413	0.297294	0.185485
H45S	1.142782	0.236523	0.086143
L4F	1.141956	0.275313	0.105774
E154V	1.119649	0.109459	0.079798
D116H	1.108138	0.357593	0.089995
L62I	1.093305	0.304238	0.166421
I14L	1.092509	0.189243	0.070259
D116Y	1.076413	0.111828	0.074516
D116M	1.071348	0.068511	0.072773
E154K	1.047673	0.207543	0.12325
I91A	1.042866	0.15741	0.07165
L156Y	1.037471	0.086083	0.062928
I91G	1.03477	0.04214	0.053504
K38N	1.030419	0.191168	0.12758
E154M	1.015258	0.177128	0.099266
W47V	1.008386	0.068563	0.083332
C85L	1.008159	0.089142	0.10165
A9N	1.003032	0.205308	0.147651
D116I	0.987545	0.424015	0.106917
W30S	0.956178	0.207533	0.133782
A6I	0.939539	0.245201	0.118827
W30F	0.935061	0.071351	0.096096
W30M	0.928257	0.254354	0.102064
C85F	0.923853	0.309261	0.286558
I41C	0.921558	0.012893	0.089076
R98Y	0.920043	0.171635	0.07696
L24G	0.917813	0.168818	0.077442
M92I	0.912665	0.04592	0.084383
R12K	0.911451	0.186208	0.134644
H45A	0.909803	0.153417	0.1106
A9T	0.906075	0.328054	0.091164
W47Y	0.898841	0.420812	0.114912
L62V	0.897067	0.077084	0.094457
F137I	0.89629	0.236178	0.12408
L62T	0.893335	0.13677	0.097058
H45T	0.891305	0.236035	0.05201
W30H	0.887169	0.033887	0.130204
H114K	0.876897	0.069709	0.061486
M92F	0.874195	0.430258	0.100236
D116L	0.873884	0.123092	0.049582
C85H	0.873249	0.176566	0.108943
W30K	0.868365	0.060574	0.089007
A107I	0.863368	0.147451	0.157905
R98H	0.858887	0.070818	0.131232
W47Q	0.857851	0.086919	0.075288
R98W	0.852667	0.11822	0.066314
D116R	0.850926	0.119946	0.092166
I50L	0.850197	0.029669	0.067993
N18Q	0.843206	0.45334	0.124276
E154A	0.842312	0.414856	0.075637
D11K	0.837506	0.23658	0.063452
T123A	0.837164	0.328674	0.052539
H114V	0.83668	0.077784	0.05694
F103A	0.830451	0.19327	0.067673
P39H	0.830231	0.205231	0.125331
M92T	0.826594	0.117582	0.189599
P126Q	0.826298	0.119027	0.221199
E120R	0.817379	0.151716	0.065521
S135R	0.815634	0.058769	0.050292
C85M	0.811862	0.059986	0.084539
E154R	0.808566	0.229761	0.054243
Q102W	0.805234	0.119495	0.101728
H114N	0.801632	0.284862	0.083471
W47I	0.800232	0.662589	0.095929
V78E	0.799959	0.116036	0.070692
C85I	0.794269	0.217945	0.087139
L156F	0.781829	0.193908	0.06317
R98F	0.779584	0.136086	0.087455
D116C	0.778708	0.278309	0.061746
I91S	0.778548	0.404149	0.087832
S77L	0.769964	0.527988	0.142826
H114Q	0.767374	0.155916	0.047074
S135N	0.763744	0.04043	0.0807
Q102F	0.762628	0.151916	0.069189
D116F	0.758472	0.050699	0.06964
E154L	0.758277	0.083654	0.052496
H114R	0.757887	0.103011	0.072031
E154T	0.753507	0.211873	0.05259
V72H	0.753307	0.078338	0.152208
H114A	0.752878	0.158397	0.073672
L4Y	0.750328	0.160922	0.093864
H124Q	0.747764	0.384369	0.092521
G86P	0.74206	0.1465	0.056867
D116G	0.741586	0.133205	0.058693
D11Q	0.739642	0.040295	0.119775
D116V	0.738585	0.272631	0.075276
C85Y	0.735476	0.506399	0.145458
C152S	0.733119	0.647613	0.067441
L62C	0.733007	0.140242	0.146432
F137C	0.732775	0.278232	0.069596
S77V	0.731656	0.067679	0.079075
I41V	0.730428	0.070202	0.073781
E154S	0.729324	0.079303	0.040453
E48W	0.728645	0.063606	0.06927
L156M	0.72834	0.043556	0.053424
P126D	0.725907	0.190644	0.098181
E48G	0.72587	0.108052	0.062308
L62A	0.720198	0.16596	0.123016
I41A	0.714484	0.019548	0.101286
V72Y	0.714289	0.23767	0.164565
D116K	0.7125	0.054599	0.078543
M92Y	0.711877	0.314193	0.053312
W30L	0.707863	0.073076	0.066889
W30Y	0.706081	0.247766	0.08672
E154C	0.703864	0.576379	0.061974
H45P	0.700128	0.090894	0.074121
E120D	0.698358	0.008322	0.096075
S77F	0.698144	0.264044	0.117786
V119N	0.697375	0.205608	0.046877
H114L	0.697249	0.055962	0.066379
E118H	0.694741	0.11437	0.132591
D116W	0.694421	0.052927	0.060054
I60Y	0.68977	0.148583	0.080234
H114E	0.682791	0.184367	0.052238
H124C	0.680855	0.082589	0.089604
V119T	0.680148	0.140721	0.05016
P66F	0.67837	0.049446	0.155348
Y111C	0.675761	0.398223	0.199023
Q102I	0.670161	0.045796	0.053494
D127R	0.668671	0.184194	0.057997
D127Y	0.664905	0.108542	0.081083
V119E	0.661759	0.161765	0.05064
E154Y	0.661189	0.316149	0.088452
T113V	0.660791	0.379726	0.056385
E154N	0.658014	0.070477	0.048473
V78W	0.654776	0.26926	0.110838
L156K	0.65405	0.228508	0.069746
S135K	0.647132	0.042574	0.058281
I91C	0.646227	0.101826	0.161898
M92L	0.64567	0.160422	0.086685
L156R	0.642856	0.068963	0.063288
H114S	0.64187	0.249187	0.070219
E118R	0.640651	0.107622	0.134152
P39T	0.640166	0.356766	0.089294
I91L	0.638111	0.162533	0.098616
V119R	0.633277	0.063602	0.059767
I91V	0.632837	0.637068	0.124855
D116N	0.632694	0.66503	0.104908
M92C	0.632375	0.286578	0.079107
K106Q	0.631843	0.417328	0.089062
C152T	0.625859	0.437414	0.058969
H114M	0.625473	0.104464	0.053152
S77Y	0.619035	0.088172	0.097962
E154W	0.61901	0.243298	0.073548
Q102Y	0.618991	0.316399	0.087576
Q102L	0.618421	0.148012	0.038483
E120K	0.616798	0.031712	0.060466
D116Q	0.614454	0.123061	0.041781
P126I	0.61421	0.419548	0.131238
A6S	0.613944	0.200642	0.097189
R44S	0.613036	0.148214	0.079359
S135Q	0.611214	0.187083	0.047107
D116T	0.609079	0.074769	0.056969
P130C	0.608971	0.355322	0.156277
S77T	0.608325	0.169146	0.103417
V72F	0.606767	0.188281	0.102414
S135I	0.605633	0.060965	0.111673
C152M	0.603859	0.218139	0.082787
S77E	0.603844	0.107439	0.072532
E154D	0.602054	0.166829	0.077153
E154I	0.600984	0.056172	0.063116
S64Q	0.60023	0.08606	0.088245
L156S	0.599233	0.170974	0.049029
I61M	0.598767	0.150576	0.086518
I61L	0.597883	0.061202	0.08526
E118K	0.597721	0.066054	0.063651
G67T	0.597699	0.242757	0.079595
T46S	0.596038	0.260684	0.097519
I91M	0.595238	0.076912	0.089597
F140L	0.593901	0.149878	0.062862
R12E	0.593265	0.095759	0.085917
V99I	0.592402	0.379316	0.040576
E118T	0.591392	0.052829	0.084201
F140T	0.587246	0.091628	0.060958
V119Q	0.586285	0.330883	0.067581
K76E	0.584681	0.236852	0.092682
E154Q	0.584605	0.212548	0.075847
Y151Q	0.583552	0.215473	0.082381
F103S	0.581643	0.216679	0.058151
V78Y	0.580902	0.305451	0.15695
A81V	0.577924	0.08344	0.065789
F140I	0.575706	0.256151	0.072634
C152N	0.57544	0.153536	0.095213
H114T	0.574653	0.188616	0.070721
E80H	0.574017	0.591753	0.160964
M92V	0.571769	0.309201	0.09258
H114F	0.571446	0.033327	0.055357
I91T	0.571104	0.256661	0.069263
F125M	0.570293	0.224163	0.069031
W47K	0.568519	0.073244	0.072384
I14V	0.568391	0.168675	0.104564
P126C	0.568197	0.464207	0.152941
E48R	0.567234	0.114099	0.036065
G67E	0.566803	0.029243	0.056125
V75I	0.566569	0.058027	0.060363
S138Q	0.564012	0.038074	0.062443
D127K	0.558819	0.248215	0.052288
V78P	0.557716	0.152697	0.097346
A6F	0.557178	0.154437	0.08855
F140V	0.55445	0.518933	0.053398
H114C	0.553881	0.104167	0.091485
F140N	0.553848	0.204373	0.06699
Y151V	0.552957	0.230954	0.034759
E118S	0.552822	0.215606	0.078169
H114G	0.552782	0.051314	0.029384
K38C	0.55229	0.0823	0.158633
S135T	0.551627	0.16896	0.076675
G51T	0.551569	0.133695	0.053777
M92A	0.549621	0.151307	0.065676
E154G	0.549209	0.017413	0.038253
V88H	0.548148	0.237454	0.124277
N34Q	0.546118	0.312706	0.089787
P126T	0.545161	0.148313	0.135027
V40T	0.542587	0.075873	0.108677
H114I	0.542188	0.11186	0.068073
I60F	0.541465	0.204429	0.114456
A6N	0.540301	0.124123	0.083828
A81T	0.53925	0.437402	0.09125
V119C	0.539217	0.004422	0.220067
A19F	0.537547	0.216537	0.055683
W30T	0.537258	0.096019	0.056521
M42F	0.537107	0.264764	0.059187
R44G	0.534574	0.068816	0.049057
S77I	0.533847	0.183271	0.101853
E154F	0.532958	0.507638	0.075528
C85N	0.532947	0.199622	0.086025
P39E	0.530026	0.158968	0.094346
E154H	0.529285	0.041401	0.090207
W47A	0.527781	0.156038	0.051667
S138I	0.527549	0.55896	0.131547
G67P	0.526881	0.095073	0.160126
P130S	0.523357	0.120695	0.053705
D127F	0.520381	0.277972	0.072529
V88F	0.518621	0.311254	0.059719
R12M	0.518227	0.168345	0.082972
V40A	0.517594	0.08174	0.135126
W47H	0.517042	0.027497	0.083642
P25F	0.516592	0.610048	0.114041
Y151C	0.515757	0.223588	0.092441
Y128W	0.515006	0.245654	0.055469
C152K	0.513714	0.187451	0.073045
P126M	0.513261	0.244759	0.077603
I115S	0.512317	0.042536	0.068688
I94L	0.512004	0.134942	0.048609
E118Q	0.511814	0.131611	0.161386
P21C	0.511783	0.100556	0.130426
P130R	0.511217	0.028279	0.037866
Q102V	0.50888	0.02508	0.054129
D132I	0.506605	0.177348	0.062793
P130H	0.506519	0.031562	0.094148
Q102T	0.505889	0.049195	0.061433
E120F	0.505713	0.405896	0.096115
R98G	0.505287	0.230329	0.080155
D11R	0.504602	0.189311	0.066074
D127H	0.504506	0.501162	0.046659
H124G	0.504463	0.036603	0.058559
F125L	0.503303	0.13467	0.043919
E118G	0.503075	0.030307	0.070956
Q102H	0.499828	0.42216	0.083761
L24A	0.496723	0.042753	0.155465
S77M	0.495228	0.0437	0.06718
C152H	0.495131	0.19275	0.112589
D132Y	0.494586	0.274939	0.135208
A6Y	0.494292	0.127158	0.212107
E120N	0.494283	0.183703	0.065475
M92H	0.493699	0.211883	0.079144
Q102N	0.493389	0.169878	0.071903
V78N	0.493073	0.10156	0.077361
A81C	0.492112	0.025832	0.070703
R12N	0.491014	0.2082	0.124149
R159P	0.490356	0.083603	0.035952
N59I	0.488956	0.132492	0.0806
K106H	0.488947	0.245321	0.095827
E129H	0.488774	0.05106	0.064971
A19Y	0.488655	0.10238	0.113982
S77K	0.488524	0.111413	0.118842
D116S	0.487143	0.094065	0.062036
V78G	0.486742	0.085522	0.043022
S138R	0.485231	0.115483	0.035504
S138E	0.484972	0.134953	0.07593
W30E	0.484674	0.18724	0.101835
D116A	0.484183	0.132607	0.119938
D127I	0.483241	0.102384	0.055258
R33T	0.482882	0.103113	0.076813
F140E	0.481784	0.471096	0.101941
E118P	0.479923	0.039722	0.063797
V10A	0.478975	0.216778	0.071287
S77R	0.474825	0.109412	0.083253
V93A	0.474191	0.194419	0.040418
E118N	0.473976	0.187923	0.082355
R159E	0.473272	0.125346	0.047458
F140S	0.472018	0.243734	0.086529
P53G	0.470714	0.139535	0.075921
S63C	0.469623	0.120262	0.102589
S77D	0.469379	0.126706	0.061725
S135L	0.468314	0.465989	0.055929
D142A	0.467817	0.142685	0.038218
M42Y	0.467547	0.346154	0.133034
F140P	0.466947	0.102189	0.046236
F137S	0.466858	0.255555	0.056755
A84F	0.466733	0.012323	0.316032
G51E	0.466452	0.201875	0.097036
K109H	0.465864	0.402686	0.078435
D116E	0.464419	0.619057	0.070685
W30N	0.463544	0.09413	0.097156
D127C	0.462619	0.339017	0.088511
R44C	0.462548	0.140561	0.109483
P130L	0.461062	0.068861	0.062856
P126A	0.461057	0.286677	0.087181
R12L	0.46101	0.14072	0.101574
F140G	0.459605	0.120341	0.059866
V40F	0.459582	0.15513	0.09408
K38T	0.457957	0.166856	0.078843
K38F	0.456405	0.175148	0.07528
M92S	0.456167	0.368599	0.053845
W47F	0.455255	0.066448	0.088453
C85W	0.454431	0.079646	0.059012
L24I	0.453504	0.435146	0.102796
Y151A	0.453413	0.085998	0.061427
D132T	0.453163	0.085675	0.039974
E118F	0.452061	0.709867	0.073688
L156Q	0.447571	0.415392	0.159669
G86I	0.446522	0.239254	0.062006
I14C	0.445781	0.244458	0.153098
W47R	0.444005	0.14411	0.076916
E48V	0.443966	0.042718	0.077266
V78H	0.443611	0.206341	0.091961
W30G	0.443451	0.28156	0.106889
N18F	0.439369	0.034984	0.17702
V78D	0.439085	0.355883	0.112247
K76I	0.438528	0.299675	0.162147
N23T	0.437661	0.080255	0.101564
G67M	0.43732	0.135523	0.113859
L24D	0.436255	0.132051	0.152137
F153L	0.4361	0.286262	0.047746
S77W	0.43589	0.261778	0.061234
P130W	0.434155	0.064736	0.046488
C152W	0.433486	0.123034	0.09494
S135F	0.432139	0.628791	0.109309
S64G	0.432119	0.153587	0.048563
R159M	0.430365	0.061064	0.047027
R44K	0.429508	0.092357	0.043068
V72W	0.429263	0.074477	0.175012
T68H	0.428918	0.238216	0.103083
D127T	0.428696	0.225427	0.058699
V72A	0.428257	0.264792	0.110853
L24T	0.42817	0.109709	0.06643
I50M	0.426879	0.131953	0.091538
F140D	0.426685	0.071439	0.076449
E48L	0.42652	0.023243	0.038578
W30Q	0.425701	0.150889	0.105486
E120G	0.425309	0.131581	0.024597
E129K	0.4242	0.396996	0.112964
D127L	0.423389	0.058337	0.045174
D132R	0.423338	0.110867	0.021233
P130M	0.420749	0.144002	0.032673
V88I	0.420329	0.34465	0.110918
H149P	0.419037	0.064269	0.051897
S63G	0.418656	0.060517	0.070089
P130Q	0.418277	0.033393	0.066944
C152G	0.417903	0.114998	0.055492
L36K	0.417831	0.093832	0.094142
P130T	0.416213	0.129032	0.046982
M16A	0.416211	0.046354	0.090335
V88P	0.415195	0.424659	0.124431
E129Q	0.413498	0.234057	0.096138
D69C	0.413451	0.268865	0.234623
R12Q	0.413412	0.088687	0.075474
V78R	0.412726	0.218261	0.056101
F140A	0.412717	0.391767	0.073651
E129W	0.412673	0.072438	0.058061
P126N	0.411927	0.075434	0.051615
L36N	0.41145	0.02335	0.115041
C152R	0.411386	0.146001	0.055639
F140R	0.410888	0.110342	0.075989
F140K	0.410686	0.58974	0.091691
P130V	0.410545	0.031289	0.032273
E48C	0.410355	0.101115	0.101016
F137V	0.410176	0.270472	0.055184
T68C	0.410023	0.172323	0.0725
K38S	0.409376	0.125635	0.065827
P130I	0.408819	0.145662	0.065455
E120T	0.408812	0.019561	0.042148
S77Q	0.408394	0.125683	0.119501
N18L	0.408299	0.070163	0.099584
R159D	0.406127	0.076776	0.080014
P39N	0.405075	0.123503	0.107448
N23A	0.40467	0.081462	0.121516
E129G	0.404553	0.456395	0.092621
C85Q	0.404165	0.032079	0.094451
A9S	0.403174	0.224608	0.077807
H124A	0.402668	0.220142	0.083158
C152I	0.401517	0.055359	0.089774
S3N	0.401406	0.0535	0.067945
N59V	0.400477	0.190103	0.094277
H124V	0.399637	0.314061	0.074792
V99C	0.398699	0.276294	0.095611
D127Q	0.398391	0.384421	0.099599
D127S	0.39748	0.443363	0.044648
F140M	0.396933	0.191155	0.07866
L156W	0.396068	0.291407	0.046114
R159I	0.39535	0.074437	0.105797
E120Y	0.395101	0.323009	0.068554
D127G	0.395018	0.146003	0.043901
H124K	0.394024	0.293029	0.053359
M92N	0.393175	0.047591	0.064774
L4I	0.392574	0.308739	0.183329
P89C	0.392345	0.376802	0.232737
S64F	0.391777	0.098607	0.075905
Y128K	0.391635	0.054884	0.045322
G51I	0.391271	0.188016	0.097788
L4H	0.391125	0.403592	0.097044
E48S	0.390527	0.137578	0.07577
T68D	0.389492	0.197449	0.139419
D127V	0.388104	0.138402	0.044364
M16V	0.387904	0.154388	0.044553
K106Y	0.387209	0.364598	0.160134
E118L	0.386037	0.290305	0.063255
L36Q	0.385088	0.235541	0.146992
E48F	0.385005	0.169541	0.086368
Y151T	0.384129	0.012255	0.045657
A19N	0.384018	0.176496	0.078671
V88W	0.382103	0.136473	0.047045
R159C	0.382074	0.045914	0.165103
E48K	0.381664	0.093874	0.054573
R159L	0.381551	0.065934	0.077351
G86T	0.380829	0.025321	0.056565
E120W	0.378529	0.178502	0.064091
V78A	0.378043	0.176553	0.1203
I14A	0.376604	0.143324	0.089435
F137N	0.375245	0.054299	0.052083
C152Q	0.37433	0.202486	0.080109
E120Q	0.37373	0.425624	0.055714
V99G	0.372453	0.018293	0.061269
A107T	0.372023	0.301911	0.057682
S64M	0.371718	0.080653	0.060773
K106N	0.371563	0.047195	0.122906
H124T	0.371156	0.206788	0.045221
L24Q	0.370577	0.384744	0.224196
R159F	0.370461	0.032443	0.081212
R159G	0.369054	0.41151	0.037446
I91W	0.368498	0.305729	0.118843
D127A	0.366394	0.44423	0.067965
R159S	0.366392	0.415275	0.126562
G67D	0.36453	0.016746	0.12981
M42Q	0.364309	0.171945	0.120694
E120M	0.36425	0.1311	0.054382
V72G	0.363638	0.087247	0.047417
N147A	0.362302	0.010331	0.053054
I82S	0.360475	0.328921	0.074244
P130G	0.360202	0.037876	0.033687
T68Q	0.359781	0.176468	0.103448
G67V	0.359742	0.111783	0.072498
D127M	0.35952	0.104443	0.065381
S64C	0.357211	0.273844	0.058881
K109Y	0.356448	0.156092	0.108266
E120L	0.355917	0.120488	0.05144
V88D	0.355887	0.018585	0.085495
E118V	0.355807	0.162427	0.031614
P130E	0.354869	0.135799	0.029157
N34K	0.354709	0.503894	0.181616
K58N	0.352655	0.083122	0.17623
R33Q	0.351843	0.11732	0.160298
G86V	0.351535	0.217313	0.060227
P25I	0.350439	0.087691	0.199936
E48A	0.350102	0.146919	0.076983
L36F	0.349927	0.109555	0.116812
P126H	0.349883	0.14499	0.069395
H124S	0.348911	0.177877	0.053416
W133L	0.348752	0.09128	0.054917
V88L	0.348722	0.190549	0.052666
E129I	0.348527	0.212759	0.139554
V99L	0.348107	0.12977	0.028684
P126Y	0.346727	0.109878	0.102003
P130K	0.346637	0.057583	0.049445
E129F	0.346372	0.185691	0.04942
K109W	0.346198	0.279092	0.114293
D127P	0.345836	0.162953	0.035847
A19C	0.345716	0.135495	0.093353
V10P	0.34548	0.110329	0.095902
P39V	0.344861	0.034472	0.081279
M92W	0.343996	0.050751	0.051318
P126V	0.34372	0.195995	0.070182
K109A	0.343604	0.275457	0.091495
S63A	0.343146	0.063912	0.079763
M92Q	0.341911	0.197233	0.07605
P126K	0.341087	0.056411	0.073396
V72I	0.339909	0.353137	0.122743
E118C	0.339288	0.216668	0.148547
D132K	0.339027	0.105332	0.050946
E129M	0.337935	0.030222	0.08298
P39M	0.33667	0.031107	0.063052
H141I	0.3366	0.040214	0.077104
M16S	0.33604	0.109552	0.05056
E118M	0.335531	0.265839	0.058095
L156H	0.334435	0.042529	0.071852
D132N	0.334271	0.227747	0.1055
N34G	0.333491	0.141647	0.063557
V78S	0.33183	0.161825	0.08649
C152L	0.331649	0.240165	0.054965
K109N	0.331119	0.221206	0.020366
S64L	0.328203	0.242201	0.040068
H124R	0.32763	0.071457	0.067088
L28F	0.326201	0.173329	0.076749
D127W	0.325492	0.285558	0.113091
F137L	0.324463	0.140824	0.052027
Q65W	0.323663	0.12567	0.075285
I82A	0.323538	0.220993	0.050392
R159H	0.323235	0.249904	0.079968
E120H	0.323124	0.064293	0.08984
R33I	0.32293	0.133949	0.137774
S64A	0.321919	0.413449	0.067204
Q102E	0.321358	0.029568	0.046559
P130A	0.320942	0.152908	0.044904
F140Q	0.319445	0.155516	0.062722
D11A	0.318414	0.021914	0.135275
V72D	0.317953	0.180529	0.104368
A6M	0.316078	0.401527	0.245254
D132P	0.31596	0.115898	0.045307
S63T	0.315829	0.137925	0.033666
V75L	0.315335	0.112082	0.059294
E134P	0.315138	0.05679	0.043638
R12C	0.314971	0.701727	0.338824
D142L	0.314035	0.041308	0.041411
G67C	0.313571	0.105375	0.169886
Y111I	0.313182	0.174483	0.074184
D132S	0.31292	0.250575	0.059095
E134G	0.312458	0.141188	0.032509
S138L	0.312166	0.266738	0.035477
D69W	0.31123	0.119206	0.063588
F137T	0.310917	0.017998	0.060028
W133F	0.310643	0.221436	0.048966
H124P	0.308936	0.136466	0.048693
T68F	0.308897	0.203629	0.103707
G67L	0.307753	0.282328	0.085335
D144C	0.307657	0.187752	0.107516
E48Y	0.307329	0.215787	0.111685
F153C	0.306838	0.343525	0.119788
Q65V	0.306627	0.090604	0.067089
S135E	0.306421	0.135421	0.078771
V88S	0.306046	0.192308	0.059293
P39Y	0.305947	0.281298	0.178341
A19G	0.30545	0.045818	0.074081
A81M	0.303926	0.328293	0.059352
D87P	0.302212	0.065626	0.056806
E129P	0.302174	0.034597	0.04163
A81I	0.301475	0.328652	0.0786
H149V	0.299314	0.192545	0.059161
R33E	0.298497	0.247897	0.051845
S135P	0.297891	0.270098	0.071404
W74Y	0.296996	0.040313	0.196423
D142P	0.296885	0.251685	0.049195
D142H	0.296699	0.124971	0.051438
G51P	0.296334	0.155467	0.112536
A84H	0.296255	0.262694	0.108495
A83W	0.296204	0.174432	0.085022
S138K	0.295705	0.11862	0.044601
E101W	0.295671	0.187938	0.050039
P55Y	0.294714	0.356525	0.081774
Y111F	0.294315	0.155844	0.154779
I60L	0.294041	0.164713	0.092089
I155W	0.293523	0.093716	0.094105
T68P	0.292875	0.401716	0.106051
P66S	0.2928	0.215031	0.091216
Y100W	0.291978	0.192792	0.070766
N37M	0.291724	0.40991	0.142371
G67A	0.289482	0.40142	0.167644
P39F	0.289087	0.234355	0.134185
L62M	0.289015	0.323585	0.138182
R33Y	0.288588	0.227725	0.123754
L112F	0.28835	0.37912	0.037956
E118I	0.288126	0.203987	0.046599
K38L	0.287453	0.068505	0.085708
Y111V	0.286936	0.176612	0.040094
N37K	0.286752	0.048142	0.095373
D87F	0.285017	0.158032	0.048651
P130D	0.284295	0.165642	0.06312
C152D	0.279227	0.282789	0.084735
W74V	0.279203	0.049848	0.094388
K109L	0.278378	0.032849	0.038264
F137R	0.27833	0.091854	0.062242
F153M	0.27813	0.088337	0.08986
S148T	0.278095	0.222404	0.052073
N59A	0.277445	0.16073	0.104155
V72N	0.276257	0.153826	0.115903
K76F	0.275717	0.242203	0.118113
I60C	0.275707	0.276919	0.065178
P53H	0.274614	0.061623	0.114048
G51H	0.273707	0.185507	0.061678
R159Y	0.273215	0.615767	0.060937
E101G	0.272774	0.221407	0.037682
N37Y	0.272424	0.09052	0.084744
Y151H	0.271976	0.119711	0.036417
P126W	0.271414	0.212386	0.047515
F125G	0.271108	0.153411	0.056406
Q102S	0.270965	0.120615	0.041492
K109T	0.270891	0.203143	0.036992
D131Y	0.270566	0.349301	0.144328
I91Y	0.270208	0.382994	0.104634
P55N	0.270078	0.209668	0.05591
D11E	0.269634	0.068533	0.053244
V136A	0.269021	0.515666	0.086594
A19D	0.267983	0.099377	0.135248
H114W	0.267853	0.196994	0.055928
D142F	0.267592	0.084337	0.053915
D142V	0.267437	0.068593	0.045559
V119S	0.267161	0.163644	0.04934
V40S	0.266599	0.035784	0.089947
K38R	0.266487	0.079194	0.09988
K109C	0.264489	0.438066	0.132757
V88T	0.263339	0.049067	0.088563
W133Y	0.262824	0.003009	0.057106
Q65Y	0.262422	0.058391	0.130166
H114Y	0.261282	0.192362	0.074329
K38Y	0.260847	0.286237	0.114772
D70H	0.260689	0.134026	0.098646
G86R	0.260309	0.073082	0.018556
V72M	0.260065	0.171332	0.094815
P66H	0.259802	0.323162	0.353838
R52G	0.259092	0.167431	0.067795
P53F	0.258687	0.21311	0.095473
R159N	0.258661	0.13327	0.076065
V99M	0.258413	0.116003	0.084865
P130F	0.257956	0.090964	0.069034
D70Q	0.257253	0.133588	0.104952
M42H	0.256883	0.273878	0.151554
F125W	0.256745	0.255638	0.106513
A81L	0.256431	0.365936	0.051213
Q65I	0.255965	0.128146	0.090299
E48Q	0.255721	0.034489	0.065475
K109R	0.255028	0.428573	0.067104
Q65C	0.254606	0.150437	0.09087
F137M	0.254593	0.543288	0.054506
R44A	0.254575	0.073703	0.073528
D142K	0.25413	0.126665	0.039656
D144G	0.254019	0.123239	0.0536
K106W	0.253378	0.150207	0.099617
V72T	0.253136	0.380701	0.15924
D127E	0.252224	0.180537	0.04616
K76V	0.251792	0.127647	0.059924
P53W	0.251741	0.277009	0.049915
T68A	0.251632	0.086077	0.058052
C85V	0.251387	0.080515	0.057368
V72Q	0.250648	0.128789	0.118131
G67S	0.249805	0.241299	0.062343
D132F	0.249367	0.081197	0.087351
W74L	0.248772	0.333782	0.108766
P55F	0.248759	0.610263	0.181803
Q102A	0.24836	0.059913	0.058312
R52P	0.248333	0.075506	0.045941
V75W	0.247242	0.11136	0.071244
P126R	0.246912	0.097022	0.064942
D87I	0.245531	0.1221	0.113639
Q146F	0.24463	0.184551	0.122462
V78Q	0.244415	0.320636	0.080213
L62F	0.243962	0.243973	0.06615
E157G	0.243426	0.167559	0.046394
N59C	0.243218	0.245482	0.129416
D142W	0.242873	0.100075	0.041915
R33S	0.242787	0.170626	0.115551
E129R	0.242537	0.260332	0.075945
A6C	0.241983	0.582579	0.142028
S138T	0.241575	0.587474	0.060102
L24E	0.241421	0.182859	0.084025
P126S	0.240777	0.405035	0.085771
V88G	0.240584	0.039236	0.056597
E134V	0.238819	0.375491	0.039096
T68S	0.237291	0.309419	0.107779
E134K	0.237286	0.31387	0.055416
D132L	0.236783	0.038844	0.033508
W74H	0.235382	0.307601	0.350617
E118Y	0.233005	0.14214	0.216652
V40L	0.232409	0.062742	0.091512
V72C	0.23161	0.110116	0.16005
G86S	0.231534	0.02966	0.057172
E134L	0.231322	0.136897	0.048074
L156A	0.231095	0.057154	0.098439
L28Y	0.2293	0.345707	0.066601
R159T	0.22844	0.292083	0.076299
S64N	0.22839	0.232105	0.149799
C85P	0.228106	0.25904	0.053789
P130N	0.227777	0.152473	0.042308
I82W	0.227648	0.215865	0.078551
I91P	0.227489	0.110361	0.084553
V88A	0.226678	0.318568	0.115924
E80F	0.226115	0.019553	0.120835
S150W	0.22529	0.175529	0.076206
E134Q	0.225213	0.366472	0.066273
P39L	0.225135	0.288434	0.087992
S64I	0.22508	0.123451	0.147387
A19H	0.223864	0.203507	0.11606
Y128R	0.22353	0.281927	0.043549
N37E	0.222869	0.159576	0.060092
T73K	0.222663	0.267403	0.100281
N37F	0.222095	0.239624	0.087537
D142R	0.222027	0.020288	0.037319
G51V	0.221965	0.120465	0.063445
A83F	0.221441	0.171852	0.076228
E120C	0.221023	0.289757	0.14453
E48H	0.220753	0.4688	0.070935
K106V	0.220433	0.074314	0.049415
L8T	0.219171	0.152804	0.072058
V13T	0.218408	0.114048	0.078966
Q102C	0.218148	0.57172	0.178188
I2K	0.216337	0.321471	0.105432
K38I	0.216307	0.118698	0.075924
D142G	0.215601	0.09489	0.044395
H114D	0.214903	0.058703	0.075254
V78K	0.214516	0.085782	0.096974
T73L	0.213858	0.02812	0.096825
D70M	0.213184	0.3176	0.097475
W74M	0.213134	0.237987	0.125841
P53Q	0.212658	0.446752	0.142289
D87H	0.212643	0.430761	0.079428
D11G	0.211498	0.07788	0.046109
D127N	0.211358	0.101389	0.052258
P105M	0.21106	0.078675	0.071874
V72S	0.21024	0.018619	0.1024
K109F	0.209619	0.18615	0.077067
P66Y	0.208406	0.277628	0.270416
T73P	0.207021	0.203049	0.123242
Q102M	0.206822	0.228613	0.076991
E157Q	0.206644	0.31462	0.111591
E80T	0.204346	0.413346	0.084261
A84Y	0.204087	0.497859	0.106255
L110I	0.203503	0.40174	0.102628
A83P	0.203429	0.492902	0.185138
Q102R	0.202813	0.276315	0.060308
D87M	0.202803	0.173841	0.048754
Y151S	0.202214	0.033187	0.030418
Q108K	0.200665	0.203734	0.062239
I115A	0.200245	0.192498	0.074414
K76D	0.199265	0.399132	0.121146
F137E	0.198879	0.337294	0.039509
K106G	0.198685	0.157713	0.036108
I115T	0.197815	0.132237	0.041898
W74T	0.197754	0.063435	0.081055
R52T	0.197604	0.168432	0.094812
N59D	0.197571	0.286913	0.167098
V88M	0.19727	0.132067	0.092348
E129V	0.195081	0.369854	0.074999
V99A	0.194465	0.308086	0.075416
P105T	0.193681	0.003289	0.057882
G86Q	0.193568	0.177573	0.077495
E134R	0.193508	0.047536	0.04629
F103T	0.192945	0.137	0.065443
A145N	0.191849	0.106057	0.0442
D132V	0.191831	0.197639	0.052036
Y151K	0.191635	0.154808	0.066226
R71S	0.191545	0.028149	0.073414
G86K	0.191441	0.20454	0.062164
S150D	0.191367	0.360347	0.094662
K106R	0.190714	0.217424	0.042006
L36R	0.188268	0.34108	0.075778
D87Q	0.187511	0.099998	0.122422
R33F	0.187223	0.331118	0.149382
A83I	0.186708	0.389744	0.098224
T68E	0.186146	0.092964	0.041077
V136G	0.18539	0.199161	0.035431
R159V	0.185262	0.283357	0.039961
N59P	0.185201	0.163001	0.137647
P25Y	0.185116	0.278576	0.188373
F137A	0.183931	0.161918	0.051576
R33M	0.183214	0.329993	0.109146
Y151R	0.1829	0.184835	0.038521
Q146C	0.182309	0.094085	0.070519
V136F	0.182274	0.289177	0.069843
R52A	0.181166	0.162021	0.044884
Q108T	0.180746	0.156225	0.068846
P105C	0.180494	0.4823	0.072117
R71G	0.180493	0.162098	0.11506
R52I	0.180446	0.124179	0.048044
R33D	0.180305	0.473208	0.161697
I41T	0.179708	0.063986	0.082998
R52M	0.178203	0.119643	0.079051
T73W	0.177734	0.168414	0.091793
I61C	0.17709	0.158842	0.118033
P105R	0.175127	0.209524	0.032955
I50C	0.174627	0.395243	0.137145
V78T	0.17432	0.064047	0.093283
E80Y	0.173802	0.522804	0.254107
S64R	0.173775	0.072737	0.063207
P66R	0.173597	0.104077	0.04554
K106E	0.173552	0.062962	0.074665
T123R	0.173403	0.173494	0.039736
V99S	0.173059	0.122032	0.049648
R12D	0.172746	0.285918	0.096733
D142M	0.172685	0.038088	0.053455
P55T	0.172234	0.084581	0.080304
A145F	0.17212	0.154896	0.128833
V136N	0.171946	0.560831	0.053966
N59G	0.171928	0.103953	0.024411
A19I	0.170836	0.072881	0.096215
E90S	0.169941	0.118365	0.100916
R71D	0.169613	0.256285	0.123263
F153I	0.169574	0.354426	0.096533
S63V	0.169458	0.033691	0.071507
P105F	0.169347	0.336609	0.089422
R71N	0.169087	0.27457	0.0976
A145H	0.168866	0.195991	0.076047
E129C	0.168662	0.440757	0.061538
Y128I	0.168379	0.2793	0.11771
S150R	0.168259	0.347399	0.052984
V88K	0.168018	0.090094	0.037329
D142S	0.168009	0.204183	0.040375
S135G	0.167931	0.183019	0.04808
T123K	0.166962	0.100063	0.061639
G51K	0.165881	0.126524	0.119014
K109G	0.165315	0.094417	0.036856
E134F	0.165284	0.187634	0.038138
E101M	0.164558	0.195963	0.042418
M16C	0.164286	0.136389	0.075735
M42S	0.163867	0.262007	0.115526
K106I	0.163069	0.123842	0.092849
A143M	0.163028	0.166838	0.042906
P105L	0.162087	0.089377	0.035236
F137Q	0.160713	0.358697	0.077254
R33K	0.160261	0.106066	0.113429
V136R	0.160228	0.096446	0.042304
D70C	0.16018	0.197032	0.1361
E134M	0.159909	0.445552	0.079471
P53T	0.159697	0.114704	0.096017
D69G	0.159578	0.267028	0.052863
E129S	0.159344	0.164516	0.063942
F137K	0.159171	0.149351	0.051278
A117Q	0.15911	0.398464	0.190124
E134H	0.158011	0.205728	0.044947
K106T	0.156872	0.05714	0.070335
A117I	0.156843	0.442218	0.12599
K38D	0.155953	0.070484	0.113384
W133M	0.153889	0.119954	0.046372
I60M	0.153736	0.2584	0.132691
C85A	0.152698	0.046364	0.060605
N23G	0.152672	0.200105	0.036878
R158N	0.152121	0.294588	0.074965
Q108H	0.151955	0.175444	0.069091
D70P	0.151729	0.329171	0.086872
W30R	0.151376	0.08633	0.106493
D70T	0.15029	0.140454	0.078123
V136D	0.150272	0.45594	0.07346
R159K	0.150092	0.029852	0.05683
V136M	0.150013	0.257894	0.125692
R12Y	0.149849	0.298427	0.171065
N34H	0.149803	0.59553	0.212415
A145D	0.149044	0.116095	0.073253
S77A	0.148609	0.000199	0.15288
D132G	0.147133	0.154121	0.036942
P53A	0.146931	0.40515	0.118575
K58Q	0.146893	0.244965	0.056809
D87G	0.146667	0.149491	0.051386
N59S	0.145648	0.491455	0.081287
A145G	0.145605	0.045413	0.031312
D142Y	0.145168	0.09801	0.066264
D79T	0.14487	0.228901	0.09854
P39K	0.144647	0.104894	0.085337
A83M	0.144401	0.068145	0.080659
E129A	0.144107	0.223966	0.066572
W47C	0.143894	0.151676	0.130879
F137D	0.143587	0.137763	0.088527
G51D	0.143452	0.013897	0.066573
D131F	0.142934	0.185108	0.333436
Y111M	0.142467	0.123381	0.077071
W47S	0.14242	0.124331	0.035869
L112C	0.142108	0.225263	0.091421
D69S	0.141603	0.230058	0.091267
A9I	0.141446	0.168962	0.0848
A84N	0.141116	0.425166	0.0617
V136I	0.1407	0.100641	0.147697
K38V	0.140045	0.248012	0.075002
V119D	0.13997	0.137259	0.1025
L54M	0.139649	0.204496	0.141653
H124I	0.139483	0.22862	0.060672
V93C	0.138963	0.206482	0.072673
S77N	0.138541	0.065817	0.032988
V78F	0.13785	0.302592	0.160354
A7C	0.136871	0.155831	0.170931
P105Y	0.136341	0.156876	0.122003
P25T	0.136078	0.131403	0.105966
E134I	0.135736	0.409518	0.11804
N37V	0.135606	0.12195	0.079502
P39W	0.135082	0.20271	0.089961
Y151N	0.132954	0.274422	0.083012
R159A	0.132409	0.236644	0.097972
D70L	0.132306	0.019804	0.056804
P66V	0.131562	0.134443	0.089072
Q65R	0.131263	0.13616	0.056653
N37R	0.130762	0.07305	0.033701
A83T	0.13074	0.329813	0.111916
P55D	0.130679	0.554047	0.121706
Q108N	0.130532	0.258417	0.073625
E101H	0.130153	0.171502	0.060593
D69Y	0.130133	0.290814	0.1672
D87K	0.130005	0.16121	0.054193
V75R	0.129617	0.126183	0.054858
S64E	0.129586	0.106021	0.072643
D87S	0.129465	0.423832	0.035804
A83C	0.128998	0.128857	0.117767
D69P	0.128878	0.274084	0.068528
V136P	0.128583	0.375388	0.05564
P53L	0.127964	0.163304	0.10858
G56Y	0.127947	0.372693	0.104984
N23C	0.127448	0.193512	0.250969
W74E	0.12651	0.169144	0.066287
R71T	0.124479	0.26693	0.066483
I60V	0.123792	0.053139	0.049468
Q102G	0.122871	0.180306	0.049774
G86F	0.122735	0.305387	0.070465
G86M	0.122501	0.433426	0.043668
P25N	0.122235	0.150586	0.094787
A84T	0.122183	0.115946	0.10208
K76L	0.122128	0.337916	0.087581
F103V	0.121685	0.198691	0.036505
E48M	0.121475	0.061579	0.070813
Y151I	0.121344	0.408966	0.069214
E129T	0.121251	0.322569	0.056758
N23M	0.119454	0.17694	0.191011
Q65S	0.119396	0.032832	0.065412
E157S	0.119244	0.074381	0.044021
Q65T	0.119002	0.088482	0.087271
V72L	0.11862	0.168874	0.083415
E157K	0.118457	0.057136	0.075352
P89A	0.117905	0.233173	0.232813
G51W	0.116958	0.475353	0.125256
A83N	0.116688	0.117838	0.068282
L24N	0.116661	0.128919	0.188285
A9V	0.116547	0.038152	0.125508
W74A	0.116528	0.302593	0.150217
C152E	0.116394	0.117002	0.034483
R33A	0.116265	0.107393	0.053532
D132W	0.116022	0.196055	0.062799
Q65H	0.114743	0.137487	0.038612
E101F	0.114699	0.134174	0.06214
W47G	0.11355	0.074461	0.081385
L156I	0.113507	0.365406	0.106393
M16T	0.113482	0.154068	0.179096
Q108G	0.113101	0.219512	0.026893
P105A	0.11294	0.329581	0.056281
H124N	0.112803	0.112885	0.111709
F125I	0.111972	0.193341	0.104912
S77H	0.111931	0.144116	0.101685
A29Q	0.111734	0.181854	0.107904
L112I	0.11139	0.41365	0.057286
V136K	0.111079	0.126789	0.046505
D142E	0.110562	0.445318	0.038905
R52Y	0.110182	0.192408	0.111974
E134Y	0.11015	0.277426	0.091992
R33N	0.109783	0.29855	0.16131
V75K	0.109546	0.144128	0.072305
N34R	0.109312	0.117446	0.078851
P126E	0.109279	0.305835	0.065921
F153T	0.107895	0.045865	0.071245
I82K	0.107562	0.187356	0.038948
I115F	0.106946	0.16758	0.083245
T68Y	0.106313	0.557212	0.085041
P55G	0.106084	0.022015	0.040359
V75Q	0.105906	0.101104	0.073359
P53S	0.105198	0.138047	0.058818
K58V	0.104952	0.133037	0.059222
W74S	0.104742	0.104514	0.0303
N37W	0.103785	0.219981	0.107954
M42L	0.103523	0.185331	0.079953
I155R	0.102921	0.159822	0.054377
V40H	0.101972	0.100913	0.062124
K106A	0.101772	0.441285	0.105044
T73Y	0.10171	0.452989	0.221869
C152A	0.101074	0.10354	0.04752
Y151G	0.100526	0.158047	0.070526
E129L	0.100326	0.162062	0.04066
Q146D	0.100084	0.068156	0.073632
G86H	0.099081	0.14045	0.077782
Y128M	0.098751	0.262187	0.076538
D87N	0.098705	0.122149	0.092128
R44T	0.098515	0.079045	0.04857
K38G	0.098357	0.226721	0.096928
K76W	0.098263	0.244195	0.098597
R71E	0.098249	0.049388	0.08422
P53R	0.098116	0.107799	0.072348
S64K	0.097306	0.079031	0.059591
A143F	0.097293	0.18798	0.044281
S49T	0.09727	0.032312	0.04586
A83V	0.097211	0.004661	0.067894
E101K	0.097136	0.252737	0.066681
E118W	0.096541	0.049531	0.10839
L112H	0.095997	0.070339	0.067035
E157R	0.095197	0.133488	0.048808
Q65D	0.095082	0.077357	0.094727
E139T	0.095007	0.295254	0.04944
I82T	0.094635	0.212893	0.071926
I82V	0.093987	0.081965	0.061658
S138V	0.093895	0.051815	0.031923
V99N	0.093385	0.082154	0.110867
P105Q	0.092351	0.311284	0.091387
V88R	0.091787	0.564684	0.05754
T113N	0.091266	0.081785	0.079169
E17G	0.091186	0.119136	0.065572
A143K	0.090805	0.146233	0.062898
T73E	0.090139	0.243602	0.146089
P105K	0.089054	0.125425	0.026634
R158G	0.088791	0.151379	0.054499
K58D	0.088541	0.143985	0.069193
R52S	0.085959	0.25023	0.069149
H141V	0.085666	0.059142	0.048755
A26Y	0.085586	0.198518	0.243331
T68L	0.085305	0.148896	0.057208
V88Q	0.085217	0.463181	0.080994
P66W	0.085126	0.102235	0.081262
L36G	0.085059	0.085172	0.05434
N147S	0.083135	0.081714	0.041808
V72P	0.083092	0.38369	0.130927
K58C	0.082915	0.318226	0.081426
D142T	0.082826	0.024972	0.053618
D142N	0.082707	0.104618	0.049355
P39A	0.082372	0.149977	0.094154
D87L	0.081368	0.057293	0.04013
P105E	0.080946	0.237903	0.035066
P25M	0.080906	0.282491	0.069539
Q108S	0.080863	0.310881	0.033293
H141T	0.079802	0.071367	0.06278
F137H	0.079297	0.045836	0.068966
N34S	0.078856	0.164841	0.101761
K109S	0.07877	0.084608	0.068357
E129N	0.078711	0.220837	0.080731
W30A	0.078155	0.051413	0.122281
L62H	0.078033	0.254161	0.163746
P53Y	0.07755	0.207018	0.136562
S135Y	0.077474	0.04719	0.066945
K76Y	0.077203	0.16649	0.10201
D70R	0.077052	0.114539	0.072787
T73S	0.075696	0.074237	0.141951
G86N	0.07474	0.168869	0.043402
D87T	0.074707	0.107115	0.059961
W22F	0.074607	0.266427	0.326684
C152F	0.074314	0.445906	0.096177
G97A	0.073802	0.305079	0.099426
D69R	0.073202	0.213739	0.083592
R52C	0.073159	0.270608	0.056053
P89V	0.0731	0.265568	0.111443
P55H	0.072853	0.107403	0.119339
V75M	0.072696	0.172823	0.153027
G86L	0.072605	0.048273	0.044829
G86A	0.072589	0.362641	0.071508
I91K	0.072374	0.238949	0.050555
D131W	0.072284	0.297987	0.093884
H45N	0.072031	0.107036	0.097642
E157A	0.071887	0.129014	0.046327
R52D	0.070969	0.425011	0.148077
I115C	0.070533	0.389811	0.107156
W74Q	0.070452	0.278045	0.119377
Q146Y	0.070414	0.110818	0.059447
V40M	0.070021	0.353352	0.141629
D87W	0.069997	0.552712	0.075081
G51Q	0.069653	0.14499	0.131077
G86E	0.06828	0.372609	0.085698
V136S	0.068232	0.219228	0.053223
A117V	0.068142	0.259483	0.054195
L112M	0.067801	0.344593	0.043589
P89F	0.067248	0.32084	0.247569
F140W	0.067125	0.001235	0.122337
K109V	0.066794	0.448566	0.045717
C152V	0.066722	0.0048	0.062039
A117D	0.066634	0.398387	0.164653
R44M	0.065684	0.110757	0.073811
N59H	0.065186	0.293296	0.160001
Q65E	0.064395	0.501558	0.053377
R159*	0.063761	0.505331	0.110904
A84S	0.063535	0.139821	0.087096
S64V	0.06341	0.175764	0.088838
G51F	0.061267	0.152971	0.094905
D142Q	0.0611	0.291865	0.050473
D69L	0.059475	0.197062	0.072374
D144S	0.059419	0.207369	0.077093
H45G	0.058733	0.076794	0.059763
P55L	0.058366	0.104773	0.084931
D131P	0.057002	0.10902	0.049796
W74N	0.056966	0.315235	0.098918
D69A	0.056951	0.3885	0.089132
N59T	0.056741	0.12219	0.092094
P66N	0.054995	0.333119	0.164121
E101R	0.054559	0.111579	0.031258
Q146G	0.054449	0.063055	0.025737
D79H	0.054197	0.180994	0.11399
E90D	0.053967	0.137975	0.117857
A83L	0.052106	0.192194	0.054445
P89W	0.052078	0.55669	0.163221
Q146I	0.051907	0.192737	0.05241
K106S	0.051835	0.195987	0.059562
D132Q	0.051588	0.2471	0.074952
R71I	0.051003	0.419676	0.078509
T73R	0.050727	0.143581	0.099161
P89G	0.050576	0.376342	0.097568
R158S	0.050277	0.164083	0.080875
Y111L	0.050031	0.19359	0.057847
E134N	0.050013	0.122892	0.041814
V40I	0.049057	0.344475	0.16615
P105N	0.04877	0.065581	0.046866
S138D	0.048502	0.177799	0.114726
E80V	0.047934	0.121514	0.056103
S135M	0.047777	0.317608	0.043686
P105G	0.047684	0.245483	0.041908
E157D	0.047007	0.225789	0.100346
R98A	0.045951	0.128812	0.053661
E134T	0.045623	0.15607	0.051282
R52K	0.045266	0.0565	0.064632
I60A	0.045252	0.080026	0.055758
I82E	0.045166	0.125511	0.034396
N59K	0.04433	0.050222	0.070936
R158K	0.04307	0.110082	0.036897
P53E	0.04288	0.321458	0.059388
E101Q	0.042053	0.257852	0.07472
D132A	0.041891	0.211039	0.037777
N37S	0.041464	0.231181	0.107642
P105S	0.041318	0.22136	0.064911
E139L	0.040732	0.188154	0.034082
V75T	0.040529	0.210862	0.084847
S138M	0.039816	0.476034	0.050337
Q108R	0.039241	0.26222	0.059504
T73H	0.038617	0.156386	0.144744
N18T	0.038048	0.287017	0.118136
N37Q	0.03753	0.154154	0.091237
A84I	0.036611	0.225338	0.078139
E134C	0.036286	0.334771	0.103109
P66L	0.036091	0.088632	0.080762
D70S	0.03565	0.051189	0.054918
V136Q	0.03553	0.295014	0.126197
I82R	0.035195	0.070135	0.036145
Q65L	0.034867	0.183711	0.070979
L54F	0.034086	0.470785	0.070794
V136Y	0.034021	0.584109	0.145549
L112V	0.032628	0.122179	0.033588
P89L	0.031493	0.141412	0.069911
D70F	0.031474	0.012941	0.089884
A145C	0.030769	0.325972	0.090443
D69E	0.030705	0.107167	0.110301
V136L	0.030018	0.121955	0.047798
I115N	0.029993	0.326048	0.112705
I115M	0.028839	0.165055	0.076826
V136T	0.028512	0.119661	0.057231
H141G	0.028026	0.053099	0.024324
F125C	0.027918	0.13269	0.098559
E134A	0.026751	0.022437	0.046948
D132C	0.026612	0.04765	0.069746
E17D	0.026414	0.220889	0.125024
T68K	0.025066	0.213135	0.054985
A145S	0.024799	0.352717	0.052862
G51A	0.024584	0.090502	0.07502
S3K	0.024459	0.200856	0.078928
P39S	0.024442	0.115922	0.089889
K76M	0.024262	0.152853	0.127061
V93T	0.024087	0.116779	0.069916
V88E	0.023735	0.115137	0.104933
A84L	0.023606	0.104099	0.040057
A83S	0.022451	0.248012	0.135651
N23V	0.021819	0.135636	0.121079
K109I	0.021728	0.461847	0.092591
E134W	0.021687	0.156518	0.066749
E80C	0.020903	0.185821	0.130969
N34C	0.019405	0.394869	0.113889
V40N	0.019185	0.165538	0.1435
E80G	0.018864	0.137036	0.063557
V13I	0.018852	0.339353	0.144548
N37L	0.018227	0.080408	0.078587
V40C	0.01787	0.376553	0.094831
T123S	0.017754	0.194005	0.043849
P55W	0.017669	0.197169	0.084947
S135H	0.017266	0.087052	0.090606
T68G	0.017208	0.187532	0.046581
G86C	0.016911	0.307844	0.084039
A143H	0.016363	0.151457	0.05501
G67N	0.016221	0.104499	0.05911
D69V	0.015235	0.219939	0.086915
W74I	0.014934	0.270888	0.191215
A117R	0.014769	0.293656	0.064602
P55S	0.014373	0.140552	0.05176
A84V	0.013736	0.26313	0.063951
V119L	0.012207	0.378572	0.052763
K58L	0.012172	0.262666	0.05667
T73Q	0.011603	0.598945	0.190411
R52L	0.011365	0.046368	0.070269
Q146S	0.008933	0.105087	0.035857
P89H	0.00881	0.054633	0.08315
P105W	0.008445	0.187172	0.060092
Q102K	0.008247	0.206629	0.057026
R52W	0.007968	0.242201	0.076169
R12S	0.007539	0.084427	0.051758
E90H	0.006964	0.15177	0.105786
L8E	0.006935	0.047428	0.035936
E139H	0.006733	0.180216	0.047518
Q108L	0.006425	0.081649	0.052398
P55C	0.005945	0.402965	0.327338
V119I	0.00503	0.075527	0.062304
R52Q	0.005	0.250864	0.134494
P66G	0.004905	0.161943	0.041612
A145I	0.003684	0.333792	0.095698
Q146L	0.003459	0.194503	0.054113
P89Q	0.003358	0.267976	0.08747
V119P	0.003158	0.350924	0.04562
E101L	0.002649	0.162326	0.061538
A145K	0.000777	0.131311	0.044858
_wt	0	0	0
D70E	-0.000502	0.272344	0.075335
K32L	-0.001218	0.154184	0.068894
R12V	-0.001393	0.063022	0.072683
D70K	-0.002274	0.13473	0.066137
L8K	-0.002378	0.093398	0.044722
A6V	-0.002717	0.020712	0.124471
Q146H	-0.002834	0.369378	0.070265
Q65F	-0.00329	0.177797	0.099195
C85T	-0.003783	0.161568	0.033742
A107S	-0.004634	0.141113	0.079155
D70Y	-0.004851	0.059962	0.109071
Q108F	-0.006214	0.12144	0.07283
P66K	-0.006722	0.071584	0.037867
A29L	-0.007351	0.132617	0.093461
V136W	-0.008375	0.224602	0.094649
A117E	-0.009263	0.138502	0.022282
I155M	-0.009669	0.113589	0.082858
L112Y	-0.009895	0.109849	0.129582
E101C	-0.00994	0.434243	0.08004
C85S	-0.010201	0.077041	0.043418
T73G	-0.010764	0.142712	0.088093
D87E	-0.011093	0.100003	0.046009
A83R	-0.011263	0.308249	0.057833
D132H	-0.01157	0.159331	0.078689
V78M	-0.011928	0.316492	0.111454
K76Q	-0.012069	0.342151	0.114231
L36Y	-0.012174	0.269969	0.099802
R158V	-0.012189	0.102621	0.036349
D79M	-0.013112	0.068953	0.092405
T68V	-0.013517	0.209991	0.083071
P55E	-0.014064	0.205188	0.071849
P55V	-0.01438	0.241024	0.081623
A143R	-0.015307	0.084811	0.05195
V119M	-0.015788	0.411363	0.093588
Q146N	-0.015916	0.352095	0.054678
Q108E	-0.016009	0.271719	0.094786
S150K	-0.016071	0.400503	0.048464
A145E	-0.016689	0.224944	0.053047
Q108W	-0.016944	0.280593	0.051644
A9C	-0.017291	0.076154	0.181286
Y151L	-0.017294	0.18269	0.041456
E120I	-0.017603	0.181501	0.062728
E139K	-0.017878	0.246919	0.054826
A145W	-0.018651	0.224671	0.046492
L24F	-0.018711	0.234983	0.0791
S63M	-0.018971	0.057368	0.059383
A143L	-0.019067	0.121968	0.041052
C85G	-0.01923	0.178935	0.04013
E139F	-0.019624	0.116745	0.106699
K58S	-0.019697	0.140283	0.042304
H124M	-0.020112	0.152227	0.034084
Q146M	-0.020912	0.305874	0.080753
V136E	-0.021389	0.231195	0.103968
G97Q	-0.021675	0.140179	0.049704
G51N	-0.02183	0.116693	0.097218
I91Q	-0.0227	0.212912	0.167541
D87R	-0.022868	0.495527	0.066195
T68I	-0.022946	0.126923	0.145077
R158T	-0.022997	0.021505	0.076427
K38M	-0.023711	0.090109	0.194972
L36T	-0.023961	0.083124	0.106688
A19W	-0.024138	0.133061	0.057541
P53N	-0.024956	0.148472	0.133286
N37D	-0.025042	0.078056	0.137428
A107C	-0.025658	0.061177	0.186599
S150A	-0.025687	0.286279	0.066689
D11P	-0.027216	0.078951	0.155961
N18C	-0.027512	0.424995	0.247092
Y151F	-0.027597	0.200293	0.063059
K38A	-0.028098	0.386311	0.100592
A145M	-0.028177	0.074116	0.049446
Q108Y	-0.028479	0.403216	0.123261
D11T	-0.028655	0.202869	0.102371
N23Q	-0.028919	0.419589	0.150434
D69F	-0.029086	0.341599	0.105464
Q65A	-0.029661	0.137779	0.094555
R71F	-0.030571	0.139972	0.080637
G51M	-0.030868	0.186229	0.160343
V10E	-0.031127	0.052011	0.07948
P21S	-0.03134	0.216023	0.077922
G56S	-0.031379	0.290143	0.068616
I82C	-0.031707	0.554421	0.128448
R158H	-0.032367	0.15649	0.09506
S49H	-0.032786	0.338434	0.149491
N34E	-0.032796	0.171051	0.06639
A117S	-0.033138	0.093203	0.073413
R71P	-0.033324	0.222569	0.073654
K58P	-0.035026	0.196525	0.093816
D142I	-0.035127	0.344842	0.050297
T73V	-0.035227	0.103093	0.072949
A145L	-0.035231	0.209077	0.03932
E134S	-0.035811	0.070271	0.050107
P55Q	-0.037262	0.133808	0.100719
P39Q	-0.037447	0.03116	0.152157
N59E	-0.037491	0.350497	0.068383
E101A	-0.037563	0.408996	0.048965
Y100C	-0.037659	0.304571	0.161274
D79N	-0.0383	0.277273	0.077744
P25S	-0.038473	0.164995	0.071465
E139I	-0.038586	0.057345	0.08326
P89R	-0.040169	0.227416	0.118214
T68W	-0.040302	0.352098	0.134851
P89K	-0.040804	0.537871	0.103845
P55A	-0.041357	0.188313	0.058833
P66E	-0.042597	0.309909	0.064836
D87V	-0.042843	0.263422	0.070907
Q108C	-0.043604	0.016128	0.101961
R71W	-0.043721	0.102623	0.114598
I155C	-0.043806	0.345769	0.09967
R158M	-0.044343	0.272875	0.057339
P55I	-0.044413	0.170478	0.066692
A143S	-0.044616	0.042947	0.062736
P126G	-0.046363	0.360772	0.067417
W47T	-0.046736	0.087151	0.066172
Q108A	-0.047264	0.098259	0.05366
G51Y	-0.047365	0.106696	0.072814
R71A	-0.048141	0.139845	0.091552
E101Y	-0.048394	0.601069	0.050241
E48T	-0.049218	0.117485	0.069782
D87Y	-0.049726	0.075402	0.085095
G56W	-0.050036	0.517662	0.189992
V40G	-0.050439	0.182281	0.043465
A143E	-0.050607	0.263428	0.07221
K38E	-0.050809	0.172648	0.12745
D70V	-0.050864	0.073788	0.076935
I14M	-0.051279	0.351063	0.15049
E101S	-0.051353	0.031734	0.047886
P89S	-0.051504	0.319634	0.089476
P66M	-0.052038	0.345809	0.054524
D142C	-0.053111	0.131797	0.182387
F140H	-0.053215	0.254537	0.083172
N23H	-0.053407	0.210244	0.144104
N18S	-0.053426	0.246324	0.162313
D79P	-0.053468	0.126661	0.068177
P105V	-0.053565	0.193278	0.041256
V88C	-0.053714	0.346035	0.099743
A83Q	-0.055019	0.08699	0.072286
V72R	-0.055098	0.136562	0.081809
L36I	-0.055973	0.337193	0.143276
K76A	-0.056764	0.062421	0.054223
K58R	-0.057165	0.047214	0.056122
E48N	-0.057178	0.43561	0.115864
I82M	-0.057511	0.156842	0.052798
Q102D	-0.057573	0.392498	0.073416
E139M	-0.05921	0.200411	0.044389
S49A	-0.059353	0.080859	0.083571
P89E	-0.060435	0.438581	0.139195
V75F	-0.06149	0.080894	0.054689
I82Q	-0.062365	0.184694	0.110971
N18E	-0.062783	0.024474	0.051692
V136H	-0.063373	0.025336	0.109763
A145Y	-0.063637	0.168916	0.076246
R71Q	-0.063793	0.290838	0.13139
Q146E	-0.06405	0.376004	0.051626
A83K	-0.065337	0.227597	0.055943
G56T	-0.066243	0.133687	0.12112
Y111H	-0.066718	0.177266	0.115749
A145V	-0.067227	0.205682	0.07839
F137G	-0.068313	0.091251	0.067827
H141S	-0.068722	0.157665	0.038904
D69N	-0.069301	0.081877	0.056377
D70W	-0.069317	0.230347	0.081312
R158C	-0.069513	0.275487	0.084992
G56K	-0.069696	0.126098	0.157077
Y128P	-0.06975	0.105303	0.057372
R52H	-0.071064	0.296703	0.126827
I155E	-0.071538	0.189189	0.067356
P89Y	-0.072105	0.145266	0.072219
R52N	-0.072313	0.10664	0.106258
Q146T	-0.072503	0.093064	0.042088
A26I	-0.072548	0.113874	0.178493
A19Q	-0.072633	0.249359	0.134861
E139N	-0.072791	0.040526	0.065223
R33V	-0.073706	0.113611	0.073738
E157N	-0.073781	0.134792	0.048194
Y128S	-0.073854	0.108435	0.052149
G86D	-0.073905	0.221473	0.11699
G67Y	-0.073925	0.136331	0.192673
C85R	-0.07404	0.216731	0.064646
A83E	-0.074961	0.55091	0.057666
D79I	-0.075332	0.217221	0.144045
Q146V	-0.075601	0.147319	0.02063
K58A	-0.07684	0.231146	0.074867
A83G	-0.077439	0.047811	0.043207
M16R	-0.077645	0.120757	0.049842
L156G	-0.077748	0.022302	0.103407
D70G	-0.077922	0.049734	0.044182
D144W	-0.078082	0.099988	0.09652
L112W	-0.07923	0.021102	0.081315
P130Y	-0.079493	0.223553	0.10479
V75S	-0.079553	0.149763	0.081612
P53K	-0.079634	0.416501	0.138309
R12W	-0.07984	0.393917	0.104417
G51R	-0.080215	0.182876	0.050037
P55M	-0.080446	0.155007	0.076864
G56E	-0.080475	0.087334	0.084753
W30D	-0.080607	0.098441	0.137786
G86W	-0.081452	0.238812	0.198267
A145R	-0.081533	0.165296	0.034647
H141Y	-0.082553	0.215168	0.163231
V75E	-0.082631	0.025222	0.168828
F103W	-0.082976	0.417631	0.095579
I155K	-0.083325	0.477838	0.045035
V75H	-0.084485	0.454756	0.124237
F103H	-0.084574	0.15103	0.118226
P53D	-0.085569	0.247308	0.089521
E80I	-0.085599	0.155313	0.109103
A29E	-0.085666	0.166575	0.106446
H45Q	-0.086933	0.120095	0.084626
A143V	-0.08729	0.134707	0.037104
E139R	-0.08808	0.149129	0.0372
R71Y	-0.088199	0.242332	0.06201
D70I	-0.088705	0.236664	0.109258
T68N	-0.088752	0.08998	0.054239
I41L	-0.089273	0.090417	0.060921
T113A	-0.090473	0.20696	0.146781
I41F	-0.091335	0.235015	0.084055
I91N	-0.092879	0.027018	0.121598
G56H	-0.09302	0.185455	0.130577
E139Q	-0.09311	0.199921	0.072478
T123V	-0.09384	0.519831	0.059942
P105H	-0.094274	0.146922	0.094268
A145Q	-0.095273	0.306725	0.080749
P39R	-0.095591	0.20842	0.053189
V93L	-0.095671	0.113802	0.058401
D87A	-0.095741	0.212889	0.192739
A26H	-0.095878	0.163166	0.18108
P25L	-0.096139	0.061715	0.060595
A145T	-0.096519	0.216749	0.093268
Q108V	-0.097902	0.08961	0.062056
N37T	-0.098031	0.231252	0.08141
T113C	-0.098167	0.197998	0.08927
A83H	-0.098197	0.363211	0.102803
H149T	-0.098602	0.241633	0.061332
Q146W	-0.09878	0.348714	0.0384
F103G	-0.098842	0.043449	0.105423
Y151M	-0.101382	0.097261	0.058138
H141F	-0.102172	0.389089	0.044264
D116P	-0.103387	0.371885	0.052459
E139S	-0.10486	0.123518	0.043862
N18M	-0.105091	0.176768	0.08205
I155F	-0.105201	0.03414	0.08989
L36M	-0.106503	0.069766	0.106603
P66A	-0.106615	0.227556	0.143563
I155L	-0.106669	0.046736	0.079121
E157T	-0.109943	0.178324	0.026713
E120S	-0.110669	0.348652	0.04312
A6G	-0.1111	0.230774	0.095983
T68R	-0.111425	0.092511	0.076945
K76R	-0.111644	0.220224	0.095282
I82H	-0.11238	0.162135	0.113092
D144I	-0.112417	0.466297	0.12687
I115H	-0.112486	0.083386	0.085478
K109M	-0.113166	0.134019	0.086175
R98K	-0.113436	0.353078	0.07871
D69I	-0.115516	0.195265	0.117258
N23R	-0.115947	0.059166	0.101168
Q146A	-0.116415	0.065762	0.055492
A143G	-0.116927	0.039907	0.042823
E101V	-0.11707	0.162289	0.058725
K58I	-0.117549	0.273982	0.171805
I60H	-0.117586	0.121117	0.113725
D69H	-0.117972	0.062112	0.074547
A84D	-0.118712	0.022949	0.085551
C85K	-0.119028	0.378167	0.055964
K106D	-0.119334	0.266511	0.099904
A143I	-0.120142	0.185799	0.064359
L36H	-0.120345	0.156705	0.135038
H149R	-0.121052	0.248619	0.063304
D131L	-0.121112	0.433247	0.065842
N23E	-0.121633	0.145498	0.130539
S64Y	-0.121718	0.313368	0.134506
G56D	-0.123528	0.141796	0.076415
E90N	-0.123669	0.232773	0.07458
V93I	-0.124037	0.17316	0.059555
D144H	-0.124113	0.264102	0.106319
G56V	-0.12423	0.157015	0.083152
E157M	-0.125885	0.191334	0.070505
G56M	-0.126497	0.205372	0.111228
R71L	-0.126923	0.104152	0.052102
E139G	-0.127806	0.101102	0.062403
K76C	-0.128702	0.200593	0.091287
E101I	-0.129595	0.274468	0.054516
L36S	-0.12961	0.28065	0.090998
G67K	-0.129636	0.045668	0.04699
L112T	-0.129759	0.069258	0.055823
E139V	-0.130126	0.026589	0.045133
S138W	-0.131131	0.153925	0.053558
A26F	-0.131288	0.168651	0.082831
K58M	-0.131503	0.26993	0.104424
K38W	-0.131523	0.187183	0.128423
V75Y	-0.131643	0.236908	0.078001
A19S	-0.131809	0.16508	0.096312
S135V	-0.132661	0.058905	0.065046
G67I	-0.13397	0.325507	0.168704
R71M	-0.134023	0.203306	0.115418
P55K	-0.135585	0.20488	0.076306
A143N	-0.135601	0.146265	0.040716
E90A	-0.136828	0.568164	0.084104
E48I	-0.137099	0.133425	0.130987
S64W	-0.13772	0.065363	0.089701
Y128L	-0.138107	0.050706	0.025107
D132M	-0.138821	0.246071	0.062082
G51S	-0.139203	0.094683	0.160173
P39C	-0.139599	0.468341	0.095781
P55R	-0.140673	0.112801	0.061385
I155Y	-0.140694	0.300686	0.089146
I155T	-0.140911	0.418981	0.077215
E48D	-0.141051	0.245368	0.118154
K58F	-0.142078	0.111129	0.072793
I94V	-0.142149	0.195344	0.066396
K106P	-0.143067	0.363737	0.058755
Y128T	-0.143411	0.16791	0.043075
Q108M	-0.143545	0.138096	0.086654
E139A	-0.144449	0.192699	0.066357
E118D	-0.144873	0.256828	0.138045
R71K	-0.14523	0.136921	0.059723
R158A	-0.146942	0.26873	0.047617
I155V	-0.148475	0.117733	0.058684
P105I	-0.148519	0.306671	0.096546
E80M	-0.149722	0.201585	0.067666
W74G	-0.150133	0.110248	0.075792
E101N	-0.151446	0.346042	0.056945
G86Y	-0.152425	0.370165	0.065007
S135C	-0.152476	0.090216	0.130466
S150F	-0.154342	0.21201	0.062185
F137W	-0.155526	0.170369	0.057702
R52E	-0.155911	0.337268	0.110998
I155H	-0.155965	0.269494	0.084812
A117G	-0.157207	0.181988	0.034726
D79S	-0.157553	0.198958	0.057872
A83Y	-0.15773	0.143415	0.101611
S135W	-0.157965	0.304565	0.126419
S150G	-0.158072	0.110879	0.042099
P66T	-0.1582	0.211681	0.12905
V72E	-0.15911	0.218791	0.105765
H141L	-0.15948	0.241158	0.051616
N37H	-0.160231	0.046852	0.100301
S77C	-0.160459	0.121309	0.118185
E139D	-0.163093	0.024664	0.1281
I115V	-0.163126	0.271746	0.050934
R158E	-0.163414	0.29593	0.038361
N34L	-0.164276	0.130113	0.069167
Q146K	-0.16507	0.352449	0.065337
E157C	-0.165696	0.165664	0.142039
D69T	-0.165906	0.077819	0.066497
E157W	-0.167407	0.527299	0.116825
H141E	-0.167685	0.14802	0.044739
F153V	-0.168301	0.068649	0.057268
Y151W	-0.168368	0.073923	0.087807
S63R	-0.169477	0.112645	0.041846
A143Q	-0.169968	0.071983	0.078273
K76N	-0.170053	0.202666	0.122656
A84P	-0.170548	0.18801	0.038209
K38H	-0.171247	0.084308	0.040732
D69K	-0.171851	0.056175	0.07117
I155Q	-0.172609	0.098686	0.075025
R52V	-0.172778	0.073902	0.057367
K58H	-0.173476	0.115058	0.152215
H141W	-0.174053	0.348486	0.086427
Q102P	-0.174412	0.110198	0.053766
K76G	-0.174878	0.110661	0.063437
G56F	-0.175148	0.196549	0.206505
A81G	-0.175629	0.156616	0.076424
L156N	-0.175884	0.224332	0.059886
E101T	-0.176015	0.022249	0.047957
I155S	-0.177263	0.101929	0.078529
T113S	-0.178177	0.284401	0.067809
S138P	-0.17995	0.121609	0.087195
A9L	-0.180059	0.150068	0.076292
A143W	-0.18052	0.159887	0.06129
W133N	-0.181241	0.5766	0.336014
K76T	-0.181255	0.384807	0.061624
Y128V	-0.182221	0.389797	0.060515
T73I	-0.183654	0.361141	0.175775
S150E	-0.183802	0.232528	0.061361
A9G	-0.184594	0.096865	0.066764
I91R	-0.185289	0.56381	0.057924
S77G	-0.185688	0.265061	0.077282
E120V	-0.186507	0.147848	0.072262
R158F	-0.186788	0.336992	0.074103
E80P	-0.187195	0.22912	0.085948
N34W	-0.187578	0.142718	0.071514
K58E	-0.18963	0.270173	0.067508
W74R	-0.189971	0.144908	0.065604
M92G	-0.190773	0.209847	0.071835
R33L	-0.191206	0.217672	0.102816
N23L	-0.192579	0.044164	0.078926
A83D	-0.193334	0.235817	0.088794
N147Q	-0.194216	0.506887	0.046013
A84M	-0.194272	0.268777	0.048621
N34V	-0.194464	0.148251	0.063157
G56R	-0.19479	0.127195	0.118293
F153K	-0.195575	0.170034	0.054643
A19T	-0.196221	0.096964	0.178428
E139C	-0.198498	0.084966	0.065107
I82L	-0.200089	0.240863	0.026376
E139Y	-0.200806	0.309018	0.08371
D144N	-0.201943	0.239119	0.056303
V10S	-0.203137	0.140978	0.048488
P39G	-0.203398	0.156845	0.073812
Y128G	-0.203549	0.031361	0.056306
S63Q	-0.203879	0.260706	0.077373
E139W	-0.204022	0.259889	0.047559
K109E	-0.204653	0.511448	0.132465
A117M	-0.205113	0.56414	0.087818
H141A	-0.205733	0.082756	0.052952
C85D	-0.20608	0.429499	0.073107
V93G	-0.206141	0.055228	0.052727
M16L	-0.206775	0.064379	0.060221
T46C	-0.207309	0.36487	0.119585
Q65K	-0.207959	0.242251	0.063494
L36E	-0.209509	0.160342	0.058938
E80L	-0.209658	0.247888	0.059627
I2M	-0.210279	0.586243	0.123327
R71V	-0.210517	0.273576	0.0684
E157V	-0.212105	0.260062	0.053703
V75N	-0.214207	0.330851	0.11517
G56Q	-0.214707	0.14974	0.126411
V13M	-0.215035	0.229814	0.102651
K58G	-0.21518	0.087197	0.043211
W74K	-0.215493	0.371728	0.149339
I50V	-0.216834	0.114291	0.13479
Y128E	-0.21808	0.308304	0.070778
S63W	-0.219484	0.144338	0.077306
S150H	-0.219694	0.253691	0.078269
R44V	-0.219787	0.02979	0.064675
W30I	-0.220035	0.077795	0.146307
D144V	-0.220122	0.030661	0.034463
D79G	-0.220534	0.054244	0.082045
F31Y	-0.220766	0.475191	0.064998
E80N	-0.222594	0.311402	0.172304
E80Q	-0.223494	0.07925	0.112811
H141N	-0.22364	0.234855	0.072171
G56C	-0.224495	0.32941	0.219727
S64D	-0.228134	0.2644	0.133346
D11S	-0.22818	0.178366	0.081273
N23P	-0.229267	0.060942	0.102062
D79R	-0.229605	0.059573	0.048831
I155A	-0.229846	0.281662	0.086591
Q65N	-0.229923	0.211188	0.102735
W133H	-0.23198	0.29072	0.129711
H141C	-0.232552	0.237338	0.15369
P25C	-0.23344	0.077728	0.177836
S64T	-0.234072	0.14146	0.127756
A145P	-0.237063	0.060179	0.051154
V88N	-0.237833	0.163582	0.058337
N18K	-0.238715	0.306223	0.217307
R158P	-0.24025	0.597181	0.053229
K58W	-0.240607	0.15472	0.058939
K109Q	-0.240799	0.389965	0.275687
V10N	-0.241096	0.118159	0.11277
S150Y	-0.242341	0.252606	0.12335
D144A	-0.242671	0.030048	0.080492
L36W	-0.24282	0.105327	0.081036
R44Q	-0.244016	0.122768	0.07771
N37G	-0.244047	0.04969	0.053057
H141K	-0.244242	0.171251	0.051135
D79V	-0.244249	0.022647	0.095169
P89I	-0.244788	0.043757	0.139717
N37A	-0.245368	0.300699	0.062899
E157H	-0.247393	0.034638	0.074433
K76S	-0.247507	0.197946	0.05273
P25W	-0.249641	0.255095	0.062933
P25G	-0.252092	0.061224	0.04793
F153N	-0.252195	0.009024	0.048187
D79A	-0.252265	0.056712	0.076526
S150C	-0.252332	0.069897	0.213384
A84K	-0.252406	0.320904	0.052363
D79E	-0.253149	0.130727	0.136988
Y111T	-0.253557	0.288305	0.154737
V75C	-0.254562	0.116209	0.081485
P53V	-0.25533	0.147779	0.061175
P25D	-0.255347	0.047619	0.201071
D79F	-0.256681	0.257203	0.098025
L4N	-0.256804	0.188434	0.100904
F153S	-0.25741	0.055733	0.08485
D131I	-0.25763	0.072769	0.103933
A84Q	-0.2587	0.280542	0.141147
P39I	-0.259664	0.353987	0.114311
P105D	-0.260746	0.274652	0.046446
P89N	-0.261352	0.300107	0.052621
D70A	-0.261442	0.139567	0.095183
A84R	-0.261641	0.15513	0.061391
E80S	-0.263483	0.040496	0.086701
D144T	-0.263549	0.064368	0.071349
C85E	-0.264261	0.362238	0.042961
N147E	-0.267787	0.254362	0.048427
N18R	-0.267888	0.153631	0.124759
V75G	-0.268696	0.02702	0.065044
E157L	-0.269044	0.089	0.07116
L8M	-0.269702	0.088026	0.068231
D69Q	-0.271471	0.167243	0.122607
L8A	-0.271751	0.090074	0.105893
I82G	-0.272681	0.220576	0.053409
H141M	-0.273142	0.184138	0.061461
K76P	-0.273575	0.324262	0.105238
H141Q	-0.274218	0.534541	0.059207
D27E	-0.274413	0.142375	0.169612
S138A	-0.274474	0.239942	0.09829
K106L	-0.274516	0.282779	0.090328
I60W	-0.275319	0.164424	0.084361
K32S	-0.275456	0.143988	0.107074
E157Y	-0.27642	0.347972	0.053455
W47N	-0.27867	0.193834	0.065555
S150M	-0.2787	0.161802	0.111362
N18W	-0.28061	0.038561	0.069252
D144Q	-0.28108	0.212747	0.105917
D69M	-0.281545	0.279328	0.116551
D79W	-0.281891	0.341424	0.105225
A107G	-0.281922	0.355609	0.088262
P25R	-0.282044	0.102807	0.10291
T73A	-0.283718	0.270711	0.132132
P53I	-0.284093	0.131824	0.110839
D131N	-0.284212	0.107749	0.062496
D79Q	-0.284641	0.178435	0.082396
L36D	-0.285615	0.150051	0.110064
H124L	-0.286423	0.208812	0.050882
A143T	-0.28648	0.319632	0.028678
V13A	-0.286673	0.453485	0.072367
G56A	-0.286761	0.134306	0.155302
K58Y	-0.288675	0.21956	0.07898
N147T	-0.291015	0.320751	0.036491
I61V	-0.293164	0.189615	0.107235
Q146R	-0.293407	0.036378	0.026842
G67F	-0.294592	0.329938	0.205778
E101D	-0.295015	0.206339	0.069369
N59F	-0.297411	0.03498	0.079932
R158I	-0.298066	0.38141	0.046333
T73N	-0.300868	0.223055	0.107199
M16W	-0.304578	0.098788	0.073916
N18A	-0.305781	0.449646	0.104075
R52F	-0.306056	0.247892	0.10541
E80R	-0.306736	0.147029	0.053434
D70N	-0.306798	0.213825	0.056306
P53M	-0.309394	0.043978	0.101776
K32V	-0.310882	0.096436	0.098443
A26P	-0.312186	0.093426	0.139418
A81S	-0.313907	0.2961	0.110211
E90G	-0.314472	0.079356	0.06128
N18G	-0.315947	0.119873	0.043162
A29W	-0.316459	0.1629	0.124174
Y100A	-0.319616	0.145222	0.091985
N147C	-0.319619	0.394602	0.111393
A29S	-0.321566	0.101669	0.108609
H141R	-0.322051	0.265722	0.061074
R158D	-0.322753	0.199619	0.108675
D144M	-0.323297	0.105408	0.04808
N59M	-0.323676	0.086147	0.137356
L112A	-0.323968	0.16219	0.100749
E90Q	-0.325896	0.246683	0.202304
D144L	-0.326384	0.026218	0.049531
E157I	-0.327962	0.320657	0.109284
E17A	-0.328916	0.647186	0.143826
A84G	-0.330522	0.311131	0.056103
N37I	-0.330718	0.181195	0.10524
L156D	-0.333723	0.419439	0.145673
S63H	-0.334001	0.177027	0.090792
E90Y	-0.334474	0.070168	0.181154
S138G	-0.33486	0.044908	0.050573
W74P	-0.336734	0.1042	0.165519
F153A	-0.337208	0.09709	0.131007
G56L	-0.337939	0.310991	0.15071
I94Q	-0.338092	0.236822	0.101361
I5F	-0.339196	0.053035	0.137193
I91H	-0.339373	0.371851	0.174167
V93S	-0.340304	0.057785	0.065824
Q65M	-0.340335	0.263921	0.087803
I60T	-0.340452	0.568027	0.08019
G97R	-0.340717	0.352542	0.074374
E48P	-0.341049	0.333831	0.132462
M42A	-0.34117	0.331984	0.110953
N23W	-0.341777	0.385049	0.146421
E80K	-0.341938	0.075441	0.054734
N34A	-0.341949	0.126248	0.085619
G51C	-0.343724	0.152584	0.103762
N23S	-0.344628	0.231749	0.164439
M16Q	-0.345205	0.13556	0.048923
V10G	-0.345622	0.094906	0.069719
G96L	-0.347066	0.634165	0.277068
L28M	-0.347377	0.183858	0.112752
L112Q	-0.349849	0.030868	0.149207
T123C	-0.355863	0.242764	0.152797
E157F	-0.357111	0.20521	0.046461
D132E	-0.359178	0.032964	0.061398
A29K	-0.359333	0.148506	0.07013
D144F	-0.359709	0.352218	0.109684
P53C	-0.360827	0.298207	0.139806
K58T	-0.361345	0.195439	0.102948
D79L	-0.361664	0.153362	0.096949
V72K	-0.365863	0.129965	0.063364
R44Y	-0.366362	0.27952	0.103228
G56N	-0.366431	0.364321	0.124699
L156E	-0.368285	0.359232	0.07954
N147H	-0.370629	0.005489	0.109465
L8R	-0.371908	0.059623	0.067549
H149N	-0.372278	0.498741	0.14823
Y111W	-0.373203	0.045193	0.120722
E90W	-0.373371	0.215966	0.102214
N59Q	-0.374398	0.50546	0.160608
S63I	-0.374839	0.143093	0.136442
D79K	-0.37535	0.176038	0.110232
F153H	-0.375667	0.258464	0.113332
V119A	-0.378568	0.369914	0.154189
S150T	-0.379773	0.0626	0.058278
E17N	-0.384086	0.043777	0.118606
D79Y	-0.385442	0.175112	0.125421
V75D	-0.386486	0.106685	0.144396
Q146P	-0.387225	0.155389	0.054413
E80W	-0.38734	0.191743	0.142729
I94C	-0.387931	0.248752	0.15621
H149C	-0.388411	0.526455	0.138455
N59W	-0.388496	0.10213	0.100976
Q108I	-0.388836	0.526452	0.069785
G97S	-0.390731	0.164425	0.067899
I94M	-0.392177	0.163052	0.094247
G51L	-0.394324	0.201209	0.079766
G67H	-0.39488	0.275136	0.220657
H124E	-0.396933	0.572885	0.045548
T35S	-0.397348	0.486299	0.215718
Y128N	-0.397743	0.190325	0.06983
A29T	-0.398129	0.111986	0.100114
L54I	-0.398346	0.243015	0.037218
S49D	-0.399139	0.066696	0.073711
I115Y	-0.399368	0.068317	0.107746
V78L	-0.400233	0.108842	0.083023
V119W	-0.400638	0.544861	0.070984
A143P	-0.402503	0.086003	0.039475
E139P	-0.402935	0.230928	0.127018
I50T	-0.404154	0.190328	0.170935
S63L	-0.404197	0.126519	0.055088
L110C	-0.404459	0.000789	0.12524
W30V	-0.405314	0.122772	0.098632
P25H	-0.408289	0.292586	0.181165
F31M	-0.408941	0.164791	0.111605
S150P	-0.409305	0.099134	0.067137
V13L	-0.410226	0.064732	0.071829
T73F	-0.412579	0.332141	0.201463
V13S	-0.416124	0.041978	0.114685
A19M	-0.416844	0.144439	0.102628
N34F	-0.417802	0.356546	0.09672
D131T	-0.418531	0.555471	0.079659
G97E	-0.424593	0.391934	0.061846
A117N	-0.425998	0.151795	0.059631
A117T	-0.42704	0.252281	0.116232
G97N	-0.427785	0.267297	0.069831
P21A	-0.427802	0.296025	0.188561
F153Y	-0.429285	0.368183	0.129983
W47E	-0.430354	0.397347	0.088589
L110V	-0.432457	0.382993	0.050471
K32Y	-0.434718	0.029675	0.234742
P25E	-0.435161	0.132303	0.063518
G97T	-0.437134	0.156443	0.080883
E80A	-0.437612	0.049587	0.088465
L62Q	-0.439716	0.025637	0.066653
A19K	-0.44047	0.039939	0.084187
P126L	-0.442534	0.595176	0.063799
R33W	-0.442852	0.033617	0.098862
S64H	-0.44359	0.367741	0.220305
D11M	-0.446691	0.050434	0.097279
D131V	-0.446957	0.234024	0.09834
I41M	-0.447399	0.316449	0.063513
F31V	-0.450921	0.588961	0.073735
V75A	-0.45141	0.642398	0.232469
D87C	-0.454146	0.108473	0.110237
F31L	-0.455298	0.186123	0.144905
A84E	-0.456791	0.324411	0.062058
K106M	-0.460485	0.287503	0.063403
F125A	-0.461068	0.313063	0.078084
L8H	-0.466469	0.323214	0.357106
P21V	-0.46958	0.15194	0.094095
D131K	-0.473316	0.381337	0.055471
R44F	-0.474518	0.18006	0.09224
V119K	-0.476245	0.550583	0.059938
E17S	-0.477839	0.115026	0.046138
S49C	-0.478805	0.3672	0.137052
M92P	-0.480891	0.140324	0.182623
F103N	-0.481889	0.159139	0.199763
A117H	-0.481996	0.098277	0.095459
L8W	-0.483802	0.136972	0.080396
I5L	-0.486626	0.039484	0.088369
V78I	-0.489585	0.324338	0.088563
L110T	-0.493152	0.270103	0.094554
E90R	-0.493224	0.316103	0.088269
E90V	-0.493375	0.107659	0.078494
N34T	-0.495738	0.258797	0.224115
F103M	-0.495985	0.09872	0.049094
R44I	-0.497985	0.209001	0.164196
L24C	-0.498789	0.426812	0.261029
I115Q	-0.498872	0.116662	0.127
I82D	-0.503405	0.583292	0.085161
Y128D	-0.505498	0.188079	0.129649
V119G	-0.506404	0.28559	0.081084
E120A	-0.507564	0.644991	0.075547
S3I	-0.509124	0.267101	0.176759
K76H	-0.510772	0.010472	0.161458
I115W	-0.511826	0.063861	0.096445
S49F	-0.512378	0.323965	0.187374
W133I	-0.51326	0.344969	0.220438
F153W	-0.51396	0.358965	0.147375
P21Q	-0.51428	0.300292	0.189232
H45M	-0.515869	0.15513	0.129143
S135A	-0.518261	0.241157	0.094036
I50A	-0.518921	0.09823	0.146505
R12F	-0.521906	0.224722	0.112031
S138Y	-0.52196	0.152442	0.104062
L62S	-0.525074	0.232337	0.083932
Y100P	-0.526692	0.50471	0.353055
D144K	-0.527556	0.024286	0.091842
F153R	-0.530213	0.346152	0.163709
A29F	-0.532149	0.236543	0.098511
F103L	-0.53322	0.355769	0.049659
L156V	-0.536009	0.066009	0.098362
N34M	-0.538833	0.299627	0.102728
F153E	-0.541517	0.09861	0.08234
A19L	-0.544193	0.103195	0.094423
A81K	-0.546124	0.089039	0.335845
L4T	-0.546932	0.483893	0.120469
S138F	-0.549933	0.123744	0.098747
T73D	-0.553583	0.560648	0.212438
L112K	-0.554019	0.39929	0.195107
A81F	-0.554736	0.172635	0.06911
W74D	-0.555187	0.35817	0.230824
D11V	-0.556428	0.313019	0.127842
K32R	-0.556734	0.128541	0.076463
H149E	-0.558509	0.364217	0.128547
H149K	-0.55951	0.130392	0.083982
F137P	-0.560717	0.209955	0.18247
S49G	-0.561643	0.131197	0.084843
S150N	-0.561747	0.364129	0.120594
P25V	-0.564962	0.128648	0.045643
I82P	-0.56621	0.625815	0.144809
S150L	-0.568229	0.078265	0.05555
V10D	-0.569728	0.362974	0.236961
S150V	-0.573182	0.13519	0.049748
I94T	-0.57566	0.08697	0.064552
K32A	-0.579102	0.171129	0.113336
N23F	-0.581096	0.342254	0.169329
D11C	-0.581506	0.282883	0.118533
H45W	-0.581609	0.049591	0.108088
Y128Q	-0.581948	0.605409	0.120765
H45D	-0.586663	0.409928	0.134036
V119H	-0.586667	0.305036	0.116047
G67W	-0.587144	0.092254	0.185899
N59Y	-0.587563	0.210807	0.212575
E90T	-0.590796	0.038639	0.115885
R98T	-0.59207	0.100428	0.110397
R98N	-0.595799	0.415167	0.067357
K32F	-0.600714	0.180116	0.159963
Y100S	-0.603093	0.154502	0.118445
A26Q	-0.605464	0.164121	0.198508
N59L	-0.606128	0.193807	0.07871
D131S	-0.610667	0.155466	0.101197
K32Q	-0.611261	0.217402	0.175561
A29R	-0.611323	0.144011	0.104978
P25K	-0.612932	0.075883	0.103435
D131A	-0.619088	0.089103	0.106689
A117K	-0.622607	0.448448	0.075942
G97M	-0.626265	0.155157	0.106355
V10F	-0.626348	0.265298	0.24832
Y128F	-0.635038	0.111324	0.1913
V10Y	-0.636287	0.421976	0.182306
A107L	-0.636853	0.151195	0.120092
L8N	-0.639517	0.716025	0.232531
G67R	-0.639784	0.042313	0.09056
A6L	-0.641696	0.151687	0.091163
K32G	-0.642965	0.074137	0.062167
I155G	-0.645301	0.15168	0.082036
I155N	-0.648878	0.102012	0.052741
G97D	-0.650518	0.320358	0.143876
I115E	-0.651869	0.340606	0.402131
V13E	-0.652633	0.126121	0.116234
R12T	-0.653352	0.079648	0.062534
D131R	-0.653402	0.109997	0.091518
V93F	-0.659841	0.369339	0.225433
S63K	-0.660505	0.197621	0.095598
N37C	-0.663034	0.117711	0.153942
I60S	-0.665508	0.084494	0.104593
D131M	-0.666639	0.077403	0.101693
M42G	-0.672364	0.063199	0.071058
N147G	-0.673095	0.193022	0.078198
Y111A	-0.678335	0.230512	0.123185
Y151E	-0.682554	0.223727	0.096204
K32H	-0.683171	0.632505	0.146427
D131G	-0.6837	0.184314	0.052827
F137Y	-0.685483	0.163156	0.282939
G56I	-0.68853	0.084131	0.094022
W47D	-0.688869	0.478484	0.305989
E90M	-0.689134	0.185545	0.077089
N147M	-0.69564	0.145046	0.10401
D144Y	-0.699293	0.248685	0.173948
D11N	-0.699912	0.053077	0.141804
I41W	-0.700809	0.72271	0.208452
L4S	-0.701789	0.128076	0.138075
P89D	-0.703087	0.634716	0.168652
L110A	-0.704337	0.278985	0.094081
[truncated: 970 more rows]
