# Supplementary material for: Altered expression of a quality control protease in E. coli reshapes the in vivo mutational landscape of a model enzyme
Source: eLife. 2020 Jul 23;9:e53476. doi: 10.7554/eLife.53476 (PMC7377907; doi:10.7554/eLife.53476)
Supplement: Supplementary file 2. — Values are reported as calculated, but based on the selection calibration, differences between selection coefficients with values below ~–2.5 are not interpretable. [file elife-53476-supp2.csv]

#Mutant	+Lon selection coefficient	standard deviation	standard error
L24V	2.027151	0.121024	0.191249
W47L	1.424884	0.289183	0.148425
A6T	1.22383	0.376288	0.125138
D11E	1.118682	0.036973	0.254811
A107V	1.03727	0.17132	0.243933
A9T	0.958168	0.211591	0.107206
A9N	0.865041	0.259256	0.098179
H45T	0.847254	0.200196	0.114913
A6S	0.841938	0.231936	0.094442
I14L	0.817759	0.245073	0.11252
H45S	0.81134	0.227132	0.112286
R12K	0.801916	0.198038	0.112365
D116C	0.79811	0.171239	0.120708
W30F	0.787614	0.198692	0.097508
W47Y	0.784625	0.205041	0.109459
P39T	0.780367	0.289001	0.13893
I50L	0.778686	0.250182	0.111638
R44N	0.757163	0.278827	0.117473
L36F	0.750401	0.088472	0.157985
W47M	0.72052	0.272407	0.109991
G67P	0.703497	0.274491	0.112971
L62V	0.685995	0.11725	0.077889
I41V	0.660185	0.116852	0.102024
V72F	0.643878	0.150217	0.103543
W30Y	0.643876	0.215917	0.167231
D116I	0.643299	0.18615	0.127843
W30H	0.637458	0.194879	0.095336
W47F	0.627703	0.16911	0.106661
H45A	0.618104	0.222493	0.096051
L24I	0.611985	0.119932	0.116272
V119C	0.60694	0.00003	0.172561
L4I	0.586427	0.196979	0.133058
E129G	0.575774	0.546682	0.121984
D11K	0.568474	0.149128	0.097324
L24G	0.567938	0.215884	0.100733
W30M	0.560654	0.105743	0.118148
L62C	0.559299	0.021654	0.122674
K76E	0.555593	0.184406	0.158159
T68A	0.554347	0.152488	0.134175
A19F	0.553519	0.213296	0.11829
V78M	0.544137	0.083554	0.154721
D11Q	0.541968	0.210243	0.125214
D116F	0.538444	0.155807	0.1325
V40L	0.532572	0.058706	0.186366
S64A	0.525532	0.121899	0.088889
G67D	0.524668	0.093823	0.152827
I91V	0.519479	0.424475	0.132518
S64Q	0.519277	0.227258	0.100196
L4F	0.513963	0.204913	0.132215
K106I	0.508036	0.30211	0.046083
R44C	0.507107	0.046626	0.146026
Q65C	0.503672	0.19815	0.116297
I41C	0.500846	0.231655	0.115092
H114*	0.498519	0.108649	0.393887
T68D	0.495711	0.300615	0.085742
E118N	0.491841	0.216969	0.078627
T73Q	0.49097	0.228116	0.132025
T68Y	0.490203	0.165893	0.090892
E48G	0.485401	0.232041	0.085884
T68H	0.476211	0.125233	0.098374
G67E	0.47247	0.150186	0.085378
R12L	0.470869	0.183969	0.116216
I14V	0.470507	0.149217	0.121267
A19H	0.464071	0.176122	0.093191
N23A	0.460652	0.181043	0.09629
T68P	0.460231	0.179535	0.099488
M16V	0.458397	0.107021	0.13073
R98Y	0.45293	0.001019	0.12988
G67C	0.449353	0.383569	0.132846
S77T	0.448532	0.12703	0.10318
E48W	0.447959	0.110756	0.086453
P21C	0.443871	0.019478	0.117987
R12Q	0.442365	0.015098	0.118577
R52Q	0.441724	0.246761	0.09905
W74Y	0.44058	0.096664	0.139418
S77N	0.440246	0.128845	0.104086
A19G	0.439178	0.089284	0.116948
T68C	0.438886	0.21089	0.11233
S63A	0.43837	0.15295	0.095785
I91A	0.437521	0.069682	0.100774
N34Q	0.437502	0.188842	0.104922
M42L	0.436998	0.066658	0.104057
V72Y	0.436764	0.03357	0.117724
V72A	0.435475	0.285887	0.11796
R44S	0.432242	0.181926	0.1017
E48V	0.431112	0.179281	0.076576
S64L	0.431069	0.15286	0.08973
M92F	0.430978	0.067852	0.199203
V78A	0.430623	0.30463	0.104217
S77E	0.429732	0.186387	0.099028
D116Q	0.428718	0.231108	0.147817
V78P	0.426089	0.199305	0.095048
E154M	0.425921	0.219571	0.054414
N59V	0.425594	0.110751	0.093249
E48L	0.42387	0.135959	0.093366
P53H	0.42342	0.130198	0.098676
T73R	0.423016	0.346029	0.127959
P53T	0.420883	0.044337	0.134302
M92C	0.41975	0.015172	0.101598
S77D	0.419176	0.125269	0.09283
S64G	0.416842	0.146368	0.096426
D70P	0.412837	0.202048	0.062604
T123A	0.412422	0.192503	0.041628
R52G	0.412042	0.13067	0.092457
E48R	0.41182	0.146855	0.089149
K76I	0.408643	0.239888	0.101047
G67S	0.407839	0.141343	0.097242
S63T	0.407723	0.082614	0.117112
R44K	0.406796	0.162652	0.105404
D127R	0.400539	0.158344	0.062314
R33T	0.399967	0.187252	0.105701
R12E	0.397697	0.198418	0.102588
V88C	0.397121	0.102341	0.088822
G67M	0.39676	0.231533	0.096903
I60Y	0.396592	0.166511	0.117814
S135I	0.395075	0.120488	0.07888
D70T	0.393609	0.172905	0.089797
S135R	0.391275	0.178448	0.088585
H45P	0.387723	0.16628	0.085258
R33N	0.385355	0.105411	0.137484
E48S	0.385187	0.182085	0.081389
V75I	0.384035	0.238821	0.109003
L156Y	0.383695	0.335737	0.075116
E48C	0.382394	0.242955	0.112731
A19Y	0.378956	0.159114	0.125022
Q65W	0.377898	0.155422	0.083883
R52S	0.377126	0.093361	0.103427
M42F	0.376627	0.276143	0.133888
R12M	0.373671	0.152853	0.081827
D116K	0.373187	0.04136	0.114759
V10P	0.372206	0.213968	0.103685
L24A	0.371353	0.233451	0.097627
E48Q	0.370335	0.186555	0.093426
L36Q	0.369594	0.176336	0.120712
L156F	0.367978	0.168278	0.074829
M42Y	0.366818	0.110966	0.088604
P39A	0.366416	0.106024	0.14627
P66F	0.365576	0.131261	0.084387
Q65T	0.363352	0.076426	0.100154
T46S	0.362625	0.18467	0.092162
G67T	0.362335	0.182665	0.079427
P53L	0.36182	0.152318	0.093272
D127H	0.359435	0.206995	0.086021
R71S	0.359435	0.196449	0.080343
R52M	0.358357	0.226921	0.089546
R33M	0.357807	0.123564	0.107226
A19N	0.356978	0.206292	0.098181
D116M	0.355985	0.004557	0.10103
R12N	0.355656	0.13632	0.120374
G67V	0.354493	0.119393	0.09102
E48K	0.353764	0.10275	0.08634
E48A	0.353012	0.182539	0.090477
M92I	0.351866	0.078649	0.16422
S64C	0.351567	0.212055	0.124073
P66A	0.350531	0.209071	0.141046
N18L	0.348492	0.160948	0.105814
A6I	0.347247	0.119069	0.099707
R52I	0.347061	0.124802	0.115661
G67A	0.34485	0.175363	0.114974
K76R	0.343924	0.212763	0.120535
A6F	0.342114	0.122061	0.096665
N23G	0.340308	0.154095	0.097526
R52A	0.338492	0.180063	0.094384
P53Y	0.337896	0.195126	0.117514
R33E	0.337017	0.123805	0.103992
E154A	0.336637	0.166775	0.090057
E120Y	0.335836	0.00998	0.095406
L28Y	0.335662	0.021997	0.07971
A6V	0.335572	0.057928	0.098951
R52C	0.333741	0.175694	0.101733
T68E	0.333491	0.127226	0.099181
A6C	0.333459	0.229266	0.131675
I60L	0.330589	0.106116	0.102363
D116V	0.330014	0.064979	0.102141
Q65V	0.328728	0.151641	0.087643
P89M	0.326799	0.372716	0.112546
E154S	0.326593	0.176613	0.061912
P55H	0.32624	0.060094	0.116746
M16S	0.325915	0.054043	0.097955
I60F	0.325431	0.219343	0.117227
R33S	0.323826	0.140107	0.114052
V78R	0.322762	0.257542	0.104531
P53S	0.32189	0.220662	0.094527
Q102L	0.320388	0.113953	0.156472
W30S	0.319972	0.174899	0.099161
E120R	0.319893	0.055679	0.084939
F140V	0.318902	0.093662	0.081631
I60V	0.317617	0.153809	0.100277
W47H	0.316721	0.092289	0.098795
S64F	0.314518	0.189569	0.123643
C152T	0.314301	0.196304	0.087006
Q65R	0.311856	0.189871	0.080055
D116G	0.31184	0.075501	0.135907
S77R	0.311411	0.148619	0.08684
H114K	0.310987	0.027309	0.116606
D127K	0.310352	0.25163	0.055279
M16A	0.309617	0.146382	0.117918
N59C	0.309412	0.077867	0.087371
S64M	0.309091	0.166361	0.098443
P66R	0.307616	0.126717	0.094379
E118W	0.306697	0.368125	0.132153
N59A	0.305994	0.079167	0.098733
N18Q	0.305876	0.023083	0.101822
D11R	0.305672	0.186076	0.119189
R52N	0.305407	0.129365	0.096233
R98W	0.305328	0.096021	0.117679
D116R	0.304573	0.030776	0.081648
P39V	0.304131	0.055048	0.097564
S77H	0.303675	0.078555	0.08736
S77F	0.303416	0.162676	0.096031
S64R	0.30263	0.180991	0.09839
R33K	0.300924	0.143483	0.131477
R52T	0.300339	0.153193	0.096012
E154C	0.300297	0.290726	0.078964
K76V	0.300047	0.105838	0.081361
Q65E	0.299116	0.05738	0.066838
P55M	0.296905	0.160597	0.09373
R52H	0.295826	0.155942	0.088171
Y151C	0.295715	0.16317	0.089717
E118P	0.294884	0.056397	0.083388
S77Q	0.294451	0.162608	0.094424
F140R	0.293386	0.0746	0.078324
P55S	0.292651	0.056643	0.101631
D70L	0.286996	0.17906	0.079866
S64K	0.286778	0.236807	0.084756
R98F	0.286647	0.150853	0.164941
V72C	0.286495	0.157697	0.130248
D70C	0.285606	0.127279	0.092966
S138R	0.284555	0.087481	0.078925
D116L	0.284353	0.084247	0.071188
Q65I	0.284199	0.184053	0.117073
D79T	0.283961	0.16855	0.08516
D127M	0.283875	0.181832	0.0736
E48Y	0.283745	0.092874	0.083349
G51T	0.282996	0.266465	0.115506
P55A	0.282142	0.145798	0.071054
P53W	0.282036	0.213165	0.069613
T73C	0.281902	0.511861	0.113664
S138Q	0.281788	0.189303	0.084532
T68Q	0.28149	0.187478	0.086559
E154T	0.280073	0.240145	0.071278
Q102F	0.279515	0.035571	0.181203
I14K	0.279289	0.338971	0.324527
H114N	0.27893	0.146583	0.117553
A19C	0.278678	0.128314	0.099197
E154R	0.277825	0.122227	0.06577
E120M	0.27739	0.003289	0.086363
G67I	0.276524	0.115147	0.10916
E48H	0.274208	0.150766	0.102312
R33Y	0.273165	0.053034	0.145741
T68F	0.273013	0.172074	0.10869
P66G	0.272991	0.096611	0.0856
P55F	0.27256	0.194551	0.075642
K58M	0.272248	0.106797	0.093169
M16C	0.271773	0.222656	0.090428
K76L	0.271214	0.151738	0.075059
S64E	0.270391	0.172795	0.0962
D11A	0.27031	0.129133	0.096787
P53A	0.270212	0.095324	0.17159
V119T	0.26815	0.092225	0.086837
R33Q	0.267996	0.182479	0.110922
I91L	0.267805	0.083059	0.109773
H114R	0.267765	0.023097	0.065418
V78D	0.267565	0.171672	0.075751
D70S	0.266109	0.173656	0.090945
A83E	0.266028	0.27221	0.281972
I50V	0.265992	0.116548	0.08237
V10A	0.265145	0.183086	0.115023
P55Q	0.264558	0.178547	0.088323
C85I	0.264211	0.061503	0.099542
P25I	0.264192	0.021909	0.072039
S135N	0.263692	0.124756	0.084461
T68L	0.263622	0.190052	0.077876
W47A	0.262489	0.173132	0.087744
C152S	0.262439	0.206088	0.101067
N59I	0.261938	0.149008	0.096604
S64V	0.260913	0.169673	0.091962
N37M	0.260756	0.233378	0.104395
K109Q	0.258171	0.018016	0.244769
K58I	0.257601	0.095785	0.065094
S77Y	0.255843	0.143388	0.098104
E154L	0.254814	0.21136	0.067198
S64N	0.254751	0.187211	0.113869
V88F	0.254603	0.03477	0.106997
S49T	0.25323	0.187679	0.082037
D127Y	0.252909	0.150058	0.051274
K76F	0.252649	0.075848	0.094422
D127F	0.252264	0.520356	0.066567
F140K	0.251796	0.064773	0.064535
N37E	0.251777	0.167218	0.108821
P55D	0.251367	0.178949	0.114491
V99H	0.251304	0.039849	0.206001
A83V	0.250227	0.112769	0.116912
Y128W	0.250118	0.266588	0.065542
S77K	0.250043	0.244003	0.081069
H124A	0.250026	0.154427	0.061432
D70H	0.246929	0.120352	0.107306
S63G	0.246298	0.15774	0.095461
T73L	0.246197	0.241192	0.076433
D116W	0.246123	0.119923	0.109323
G51H	0.245934	0.169222	0.076562
R33A	0.245101	0.125857	0.106859
R71T	0.244777	0.108058	0.094228
F140M	0.244298	0.311536	0.110972
R52K	0.244277	0.123749	0.106256
Q65L	0.242572	0.158032	0.075688
R33F	0.242561	0.267808	0.123658
S135K	0.24224	0.133761	0.050757
V88Y	0.241835	0.2944	0.092154
A7C	0.241492	0.201225	0.104357
R44A	0.240746	0.142586	0.091112
D127I	0.240576	0.125628	0.04228
V99I	0.239987	0.096034	0.16535
P53E	0.239001	0.201923	0.081585
P25M	0.238049	0.090004	0.093052
G51D	0.237531	0.12766	0.088048
P53G	0.236635	0.243996	0.086803
T73H	0.235979	0.147303	0.127906
H114L	0.234954	0.058996	0.080083
K76D	0.234568	0.172631	0.111378
M92L	0.233454	0.025912	0.153329
D131Y	0.233403	0.197788	0.122815
E154H	0.232239	0.089865	0.06258
D69S	0.230843	0.149909	0.095315
C85L	0.230114	0.058432	0.101871
R12Y	0.229951	0.291643	0.103486
F140G	0.229854	0.148434	0.060163
T73I	0.229617	0.11926	0.096459
S64I	0.229147	0.043865	0.101274
I91S	0.228768	0.087835	0.176218
E48M	0.22847	0.133834	0.089185
Y128I	0.226215	0.033437	0.103172
E154N	0.225901	0.134651	0.062952
D127A	0.225487	0.120475	0.062528
P53R	0.225385	0.162566	0.084205
E118G	0.224427	0.078162	0.073798
I14A	0.224037	0.243373	0.103458
F140T	0.223963	0.141802	0.103464
D70I	0.223719	0.09491	0.116672
P130A	0.223711	0.125313	0.051149
P66K	0.223333	0.058864	0.09918
R71E	0.223302	0.12138	0.081894
E118R	0.223086	0.20214	0.105098
H45N	0.223049	0.096817	0.098247
E154V	0.222989	0.329742	0.096817
D132T	0.222698	0.227566	0.061812
D127C	0.221454	0.148997	0.07712
D69C	0.221229	0.321932	0.103742
D116T	0.220423	0.145673	0.182398
D79P	0.219877	0.100938	0.09751
P25T	0.219839	0.171016	0.091102
W133F	0.21935	0.234784	0.059964
R33I	0.218825	0.080794	0.148631
P55Y	0.218434	0.162288	0.091498
G86P	0.218031	0.111252	0.092369
N23M	0.217815	0.161228	0.098994
P66V	0.217491	0.163153	0.091634
V72I	0.21612	0.136886	0.132702
L36R	0.216007	0.079549	0.099275
Q65Y	0.215453	0.079038	0.111684
V72L	0.215207	0.197963	0.092588
Q102I	0.214698	0.168145	0.146417
D70R	0.214663	0.133088	0.079307
K76A	0.214368	0.126855	0.074951
E48N	0.214151	0.229186	0.08509
V72W	0.214076	0.263065	0.09365
H124C	0.21304	0.173937	0.109315
V78T	0.212866	0.110872	0.063136
R44G	0.212324	0.149478	0.095878
G67L	0.212073	0.189708	0.085549
L62M	0.211946	0.118091	0.102788
E129M	0.211829	0.065823	0.090314
L36K	0.211282	0.200188	0.121476
P55L	0.209874	0.114234	0.086172
N59T	0.206644	0.171177	0.098517
P66L	0.205383	0.218271	0.099848
P53F	0.204458	0.167656	0.103942
K106C	0.204297	0.42187	0.211791
K58V	0.201955	0.154247	0.083414
E101H	0.201597	0.015835	0.148064
K76T	0.201359	0.273036	0.072724
T73Y	0.201098	0.208997	0.142241
V72M	0.200288	0.119119	0.094215
G67N	0.200226	0.145356	0.093465
Q65S	0.199124	0.112768	0.085873
P55N	0.198491	0.098757	0.089532
F140N	0.197968	0.182032	0.047906
K58A	0.197412	0.236286	0.123447
V40A	0.196518	0.246921	0.09813
E48F	0.196433	0.245075	0.084179
S77C	0.194954	0.166471	0.143212
P130H	0.193987	0.147237	0.058773
P130E	0.19377	0.083655	0.056357
K109L	0.193278	0.085594	0.052354
V78W	0.192701	0.139057	0.120083
D79I	0.192234	0.271091	0.07573
V40M	0.191499	0.250823	0.271518
L36N	0.190934	0.124749	0.12012
H114I	0.190821	0.089124	0.077118
P66I	0.190625	0.140037	0.125946
T68N	0.189317	0.13374	0.098916
R71G	0.189035	0.134581	0.078555
P53N	0.188323	0.097089	0.100708
E129Y	0.188181	0.366745	0.103406
E17G	0.187161	0.134306	0.087166
D127L	0.186813	0.246479	0.060302
F140A	0.186677	0.230034	0.070057
H114W	0.185962	0.032208	0.049068
V78F	0.185814	0.215856	0.153142
E118K	0.185311	0.067095	0.08504
D70M	0.185232	0.137044	0.082513
T73V	0.184186	0.182128	0.096059
D69G	0.18416	0.10849	0.074612
T68S	0.183779	0.253223	0.083535
P130I	0.183761	0.053558	0.04174
F140L	0.183314	0.073428	0.080444
D132V	0.182396	0.51098	0.060595
V75C	0.181924	0.099113	0.092161
H114V	0.181675	0.026164	0.078581
K58R	0.181592	0.106801	0.060707
D127V	0.181148	0.214356	0.056529
V72G	0.180801	0.220191	0.087515
C152R	0.179748	0.223558	0.073492
P89W	0.179615	0.022636	0.096791
P126C	0.178435	0.098404	0.079155
W30N	0.17806	0.143309	0.115624
V99C	0.177756	0.072256	0.12375
H149P	0.177587	0.156995	0.074068
D127G	0.177301	0.138802	0.038469
H114F	0.1767	0.181742	0.114526
D70K	0.176356	0.137241	0.112759
H114M	0.175255	0.047702	0.074997
V78Y	0.1748	0.025627	0.120872
P55C	0.174242	0.152831	0.119593
P66E	0.174214	0.250866	0.086968
S135Q	0.174099	0.197762	0.085404
E118T	0.173954	0.08414	0.085274
D116S	0.173436	0.157148	0.113246
R52L	0.17303	0.13052	0.083794
Y151Q	0.171807	0.224837	0.082634
P130V	0.171653	0.123238	0.048797
V88I	0.171056	0.186049	0.125777
E120H	0.170189	0.040821	0.084792
D70Y	0.169367	0.252625	0.108175
A9S	0.169364	0.213747	0.108358
N59P	0.168785	0.119401	0.072509
M92V	0.16865	0.162696	0.123001
M42Q	0.168586	0.199636	0.081392
A84H	0.167269	0.120563	0.082924
Q102C	0.166529	0.129831	0.089859
D79N	0.165988	0.125015	0.07692
A29Q	0.165031	0.173954	0.117765
L24E	0.164965	0.182519	0.119578
C152K	0.164895	0.156025	0.057693
W74V	0.163925	0.147261	0.100174
T68G	0.162833	0.200344	0.095536
E120N	0.162761	0.027263	0.073467
N18T	0.161137	0.097643	0.08169
G51K	0.160871	0.129859	0.115852
R52W	0.160575	0.1331	0.088441
R71N	0.160523	0.163419	0.080924
S49A	0.16032	0.180548	0.089098
E48T	0.160224	0.128136	0.087099
V78K	0.159891	0.127901	0.080706
L24T	0.159227	0.136931	0.117089
D70F	0.158536	0.166313	0.073733
D11G	0.158459	0.131436	0.102863
L36H	0.158113	0.13706	0.110924
S135E	0.157109	0.191485	0.072811
F140P	0.155796	0.19136	0.056549
T73E	0.154096	0.300532	0.079493
P130K	0.153004	0.123683	0.05092
S64T	0.152782	0.055382	0.133369
Q65F	0.15253	0.218842	0.074509
D127T	0.151708	0.276148	0.084912
D79S	0.151086	0.110309	0.074011
E129R	0.151031	0.113711	0.076129
G51I	0.151027	0.134037	0.083469
G67Q	0.15079	0.1176	0.100928
D70A	0.150244	0.14293	0.115228
P89A	0.148674	0.164081	0.094061
G51E	0.148137	0.147352	0.101556
P130L	0.147603	0.118421	0.054032
K58L	0.147446	0.104075	0.076763
V75L	0.14656	0.214988	0.143889
Q65D	0.144949	0.243643	0.09186
K38C	0.14483	0.156874	0.10256
G51R	0.143967	0.149737	0.088733
L156K	0.143602	0.164988	0.053893
T68R	0.143215	0.151879	0.094474
N59S	0.14321	0.136336	0.070881
D79H	0.14177	0.098846	0.093217
D127S	0.141513	0.158944	0.073081
R52V	0.140869	0.090657	0.059519
G51C	0.140175	0.059692	0.055226
R71A	0.140079	0.085814	0.064407
R159P	0.139282	0.222546	0.049683
D87Q	0.138968	0.019531	0.112543
P55V	0.137643	0.152128	0.071373
V75T	0.137191	0.139166	0.074651
P130W	0.137101	0.173337	0.09009
V40C	0.13707	0.10893	0.09112
M16R	0.136893	0.140684	0.106899
C152G	0.136669	0.246717	0.052792
K38R	0.134494	0.140123	0.098693
K106H	0.134403	0.117688	0.084536
K109F	0.134394	0.000363	0.102142
D142H	0.134295	0.099712	0.083969
H45G	0.134172	0.075324	0.08418
T73S	0.134163	0.215612	0.14154
V88H	0.133514	0.127286	0.155108
R159G	0.133474	0.002523	0.10256
Q102Y	0.133139	0.054845	0.300675
N23C	0.1329	0.183271	0.108731
A19I	0.132894	0.116635	0.115765
G51P	0.132566	0.185276	0.094101
N23V	0.132274	0.146383	0.103302
K76Y	0.131895	0.117784	0.131235
E120T	0.131755	0.004294	0.06907
V40T	0.13153	0.116486	0.104112
I91G	0.131344	0.033433	0.120076
D132K	0.131295	0.206843	0.097195
P130T	0.13093	0.103731	0.06457
V88A	0.130901	0.052327	0.085358
S135Y	0.130644	0.291281	0.132301
P55I	0.130559	0.067467	0.08926
D70V	0.129588	0.089328	0.082051
V119N	0.129072	0.083958	0.07365
W133Y	0.127528	0.143163	0.077994
G67Y	0.127459	0.256292	0.122006
P53M	0.127453	0.108111	0.104319
F153L	0.127171	0.199169	0.075464
I91T	0.12606	0.034535	0.10368
P55W	0.125961	0.238133	0.108475
R52E	0.125496	0.089529	0.107597
P55G	0.125048	0.161856	0.08166
E154Y	0.12491	0.218933	0.089691
H124K	0.123909	0.098303	0.05403
D142P	0.123741	0.14545	0.055304
D87F	0.123275	0.044977	0.11225
R71I	0.123124	0.183876	0.066279
K76C	0.123105	0.082336	0.044426
P66S	0.122363	0.206522	0.110236
S138E	0.122068	0.237897	0.064165
P130N	0.121479	0.138477	0.068489
A83I	0.12126	0.04725	0.08139
V78S	0.12049	0.161803	0.113846
S138K	0.120449	0.12821	0.086164
I61L	0.120185	0.208124	0.114491
K58P	0.120061	0.041925	0.09986
L156I	0.119983	0.106976	0.106576
L156R	0.119798	0.183067	0.056014
P105H	0.119521	0.048769	0.074269
E120K	0.118965	0.058098	0.107565
P130S	0.118675	0.170151	0.045531
D70N	0.118312	0.206479	0.080717
W47I	0.117908	0.178865	0.07904
D127P	0.117897	0.220116	0.061735
P130G	0.11725	0.15887	0.055997
K106W	0.11709	0.180006	0.135848
G86R	0.117035	0.101603	0.109884
P66W	0.116649	0.207034	0.098442
P55R	0.116575	0.123213	0.079446
F137Q	0.116213	0.154163	0.047975
P25F	0.115373	0.223723	0.1032
K76W	0.115282	0.131108	0.077261
Q146C	0.115029	0.051359	0.065411
Q102W	0.114613	0.124669	0.11937
A117I	0.114184	0.185802	0.068656
K76G	0.114063	0.088905	0.080386
H114S	0.113718	0.112797	0.087787
P105A	0.113272	0.112289	0.122238
D70G	0.113213	0.064286	0.080666
V119Q	0.112196	0.060253	0.123008
H124R	0.111697	0.156165	0.045654
V88T	0.110246	0.111798	0.109718
P55T	0.109712	0.097029	0.085162
K58H	0.109712	0.270135	0.125351
N37Q	0.109208	0.030266	0.131037
V88L	0.109149	0.005148	0.098725
K76S	0.108585	0.160225	0.101393
D142F	0.107777	0.223319	0.065026
G56H	0.107544	0.233657	0.098395
Q65N	0.107164	0.115124	0.076133
P55K	0.106878	0.157454	0.074769
P130R	0.106837	0.217332	0.069822
P130F	0.105899	0.012715	0.107308
F140E	0.105511	0.110845	0.080084
T68W	0.10526	0.162541	0.083703
L8T	0.10393	0.135234	0.093653
K106T	0.103309	0.070877	0.076834
E120G	0.10293	0.052938	0.081619
F140D	0.100889	0.123205	0.077748
P89Y	0.100702	0.195282	0.101892
V72S	0.100515	0.199023	0.084618
P130D	0.100038	0.133341	0.056747
R33V	0.099008	0.167654	0.111793
Y151V	0.098088	0.19359	0.049889
E134R	0.097809	0.161058	0.053757
A26H	0.096639	0.228633	0.148604
H124S	0.096185	0.152197	0.067285
P105Q	0.096157	0.105911	0.126342
K109H	0.096104	0.090638	0.08113
D127W	0.095735	0.165025	0.062094
R71K	0.094812	0.14586	0.089621
T68V	0.094644	0.224731	0.080875
E134C	0.094323	0.21136	0.048133
K76H	0.094291	0.092061	0.10521
G51N	0.093887	0.200282	0.071434
M92Y	0.093139	0.203999	0.103256
R159F	0.092712	0.093765	0.069429
P126V	0.092487	0.224611	0.049724
P66M	0.091928	0.170167	0.085618
D87G	0.091492	0.047187	0.065725
V78H	0.091404	0.218519	0.103051
V136M	0.091388	0.02137	0.081128
E154I	0.090684	0.17972	0.071315
M92T	0.090585	0.057978	0.108731
R159A	0.090418	0.087589	0.089487
P105T	0.089628	0.056529	0.133929
S135M	0.089382	0.0616	0.081114
K109I	0.088637	0.103126	0.104421
F137L	0.08796	0.016476	0.097429
D132S	0.087529	0.172692	0.051192
E157C	0.087351	0.156551	0.109632
R52D	0.087045	0.159807	0.089216
Q65K	0.086904	0.209629	0.085075
E118L	0.085436	0.116203	0.109224
L112F	0.084509	0.0967	0.078833
F140S	0.083912	0.241627	0.069315
V75S	0.08378	0.14735	0.092969
E129C	0.083402	0.188683	0.086075
D142A	0.083345	0.093761	0.086202
Q102T	0.082949	0.023002	0.152402
K106V	0.082338	0.001806	0.101364
H124V	0.082311	0.141422	0.066201
A29L	0.08155	0.119323	0.106003
Q102A	0.08138	0.003074	0.110529
V88W	0.081254	0.007235	0.111446
N34S	0.081166	0.186218	0.08232
I61C	0.080111	0.335634	0.132217
D127N	0.079354	0.176771	0.047623
R98G	0.079234	0.070337	0.136581
V88S	0.078832	0.116429	0.115944
V78N	0.077878	0.261216	0.104208
L36S	0.077145	0.085967	0.103076
N147A	0.076489	0.209019	0.046249
R159T	0.076468	0.119689	0.091991
F140W	0.076467	0.118816	0.075417
D142V	0.074943	0.111053	0.078442
D79R	0.074622	0.13116	0.085749
K106E	0.073941	0.111032	0.109608
K38T	0.073817	0.200331	0.092776
V119R	0.073743	0.062265	0.098069
E134Q	0.073283	0.25173	0.118579
V78Q	0.072539	0.080852	0.096959
Q65A	0.071598	0.175769	0.067193
D70Q	0.071461	0.160507	0.08608
G51V	0.071377	0.139513	0.09079
E120Q	0.071353	0.05236	0.09213
K58N	0.07086	0.37697	0.162236
E129S	0.070209	0.118564	0.038975
Q146F	0.070193	0.11643	0.07173
D144G	0.069832	0.13737	0.063598
G51S	0.069621	0.110215	0.069794
A29E	0.069473	0.133456	0.105909
R33L	0.069448	0.130504	0.103477
D132R	0.069094	0.201684	0.070952
N37F	0.06892	0.080414	0.102037
Q102V	0.068092	0.00558	0.086583
P55E	0.067755	0.053715	0.084556
T73A	0.067734	0.223963	0.102184
V119I	0.067436	0.061198	0.068065
A83H	0.066875	0.015311	0.079826
G86Q	0.066811	0.061209	0.108744
F137S	0.066637	0.335377	0.113626
T68I	0.066228	0.169245	0.123384
K58Q	0.065614	0.240615	0.084131
G51Q	0.065566	0.152729	0.086018
R71D	0.065348	0.176756	0.101059
D131W	0.065144	0.133923	0.087317
A9C	0.064739	0.157958	0.104628
D79V	0.064659	0.538106	0.083633
C152H	0.064504	0.242579	0.075531
R52F	0.063986	0.103291	0.0898
D79K	0.063105	0.077966	0.063871
K106S	0.063068	0.253909	0.097396
V88Q	0.063048	0.003615	0.119964
H114C	0.062996	0.061844	0.118964
W47Q	0.062729	0.194641	0.080078
C152N	0.062718	0.214254	0.042961
D69A	0.06263	0.232317	0.11046
D142L	0.061972	0.130648	0.051616
A84F	0.06138	0.09705	0.186346
D69P	0.061141	0.188173	0.080336
S135G	0.060887	0.211723	0.07101
S77M	0.059447	0.15086	0.099694
A145H	0.059129	0.180653	0.083241
W74T	0.058979	0.214319	0.117986
G97Q	0.05875	0.09626	0.108063
K58F	0.058603	0.145079	0.069435
K106F	0.057308	0.092453	0.165201
P130C	0.056253	0.251337	0.090045
S64Y	0.056183	0.202862	0.1026
P66T	0.056108	0.111941	0.183332
P39C	0.055567	0.123938	0.139655
E120I	0.055444	0.013138	0.054469
P130M	0.05388	0.107092	0.047123
V99A	0.053146	0.112003	0.066645
N37W	0.052554	0.123907	0.098153
L36Y	0.052106	0.155785	0.10743
K58Y	0.051712	0.144189	0.123636
P53K	0.051191	0.097189	0.118806
A83M	0.051053	0.149282	0.09016
D132L	0.050909	0.152099	0.051608
H124G	0.050766	0.173022	0.032653
V136R	0.050688	0.188597	0.070295
V13I	0.050187	0.14392	0.125975
V136C	0.049866	0.387205	0.146782
E118I	0.049715	0.132902	0.114891
E118S	0.049442	0.067152	0.095518
V40I	0.049294	0.231319	0.11903
H124T	0.048993	0.151694	0.037255
E120L	0.048365	0.034813	0.08993
T123R	0.048238	0.084756	0.03924
A83Y	0.047009	0.014479	0.130423
D87A	0.046534	0.006872	0.099306
Y151H	0.046251	0.193066	0.078474
P66N	0.045981	0.143595	0.2117
D127Q	0.04511	0.130702	0.067856
V13T	0.044858	0.096679	0.101386
R98A	0.044731	0.154397	0.100112
A84C	0.044639	0.173568	0.121982
E134Y	0.044629	0.201617	0.10403
V88D	0.044483	0.294878	0.097318
R71P	0.043852	0.200166	0.098513
V75M	0.043726	0.225475	0.135996
K58S	0.042919	0.070365	0.062514
C152D	0.04288	0.214906	0.084257
P105C	0.042563	0.110181	0.080224
P25C	0.042511	0.014311	0.117352
N34R	0.04242	0.145569	0.089494
N18M	0.042247	0.17937	0.100673
R159E	0.04192	0.474947	0.061945
W74M	0.041642	0.241797	0.09635
G56W	0.04135	0.143233	0.130079
K106R	0.041271	0.011444	0.077446
K58C	0.04103	0.176553	0.085969
E129V	0.041011	0.144682	0.116466
E157R	0.040385	0.090459	0.084006
I50C	0.040294	0.236765	0.091277
A83N	0.040196	0.014165	0.078569
A19T	0.040061	0.125506	0.076373
M92A	0.039964	0.055728	0.097867
D132A	0.039912	0.056487	0.108526
P53D	0.039526	0.068664	0.102933
H45Q	0.039101	0.216286	0.126352
G56D	0.038075	0.178985	0.093045
D132G	0.037318	0.07348	0.066681
S138T	0.037176	0.216756	0.077203
F137V	0.036894	0.087482	0.077988
A117Q	0.036813	0.085454	0.126021
G51A	0.035552	0.088784	0.091975
E129H	0.034908	0.227063	0.077945
E134H	0.034817	0.163646	0.089776
V136A	0.033749	0.125453	0.05254
Q108T	0.033064	0.095666	0.1087
D132I	0.033058	0.481202	0.068258
N37Y	0.033055	0.07472	0.119824
E134K	0.032989	0.163644	0.046931
H114T	0.032983	0.083964	0.068765
I60C	0.032864	0.160915	0.075333
T68K	0.032127	0.433788	0.280964
E101Q	0.031641	0.119067	0.119768
L36M	0.031543	0.05431	0.083686
K32L	0.031395	0.132774	0.093268
S148T	0.030602	0.199286	0.082341
D132P	0.030576	0.126969	0.074142
K58D	0.030335	0.037877	0.072641
E129F	0.030088	0.15136	0.051484
K76P	0.029993	0.081379	0.089116
E134M	0.029436	0.217236	0.089881
G56S	0.029265	0.26714	0.107034
S77G	0.029103	0.192968	0.077602
N37R	0.027913	0.136749	0.0911
I14C	0.027906	0.348464	0.109665
F137R	0.027257	0.303139	0.053397
F140Q	0.026482	0.32618	0.094881
Q108S	0.026342	0.033513	0.073862
E120C	0.026166	0.11733	0.117066
V72T	0.025178	0.058317	0.078687
Y151I	0.024968	0.466952	0.085378
W30L	0.024911	0.157544	0.128135
S135T	0.024606	0.381229	0.098778
R159M	0.024581	0.112887	0.08252
P53V	0.024045	0.138517	0.07612
R159N	0.02373	0.1422	0.055379
Q108R	0.023729	0.053257	0.079514
C152M	0.023433	0.297947	0.088708
D70W	0.022948	0.17286	0.069885
S138M	0.02283	0.245328	0.069634
F137T	0.022764	0.288094	0.050262
I94L	0.022514	0.019971	0.100493
A19W	0.020465	0.11743	0.101723
C152A	0.020454	0.047174	0.055892
D79A	0.019815	0.162514	0.07711
V88E	0.019489	0.043911	0.101276
Y151T	0.018577	0.188512	0.054034
G56N	0.017266	0.312162	0.110343
F125M	0.017162	0.142864	0.057359
E80Q	0.015915	0.083895	0.057017
V136H	0.015826	0.035363	0.060908
K106Y	0.015327	0.000751	0.157906
Y111V	0.0153	0.03221	0.089131
P39N	0.015255	0.122921	0.13748
A83S	0.014741	0.010323	0.144414
V136K	0.014467	0.145353	0.074376
E120F	0.01445	0.121098	0.092701
K58E	0.012844	0.121142	0.083477
G56A	0.01272	0.184036	0.137174
E129W	0.012429	0.083086	0.052307
A83L	0.012427	0.187333	0.082253
D142Q	0.011307	0.150539	0.06683
C85A	0.011279	0.031805	0.100469
E134W	0.010855	0.091652	0.055643
G67K	0.010648	0.125411	0.070537
H149V	0.010368	0.133939	0.046483
V99L	0.010041	0.014225	0.110414
P39Y	0.00946	0.194111	0.104877
D131P	0.00943	0.102395	0.046944
D79Y	0.0092	0.180663	0.106423
W22F	0.008883	0.050888	0.290026
P89T	0.008682	0.155751	0.091855
D132Q	0.00857	0.220076	0.101563
A83F	0.008122	0.136238	0.147103
Q146D	0.007698	0.128195	0.067742
N18F	0.007506	0.175201	0.118857
K109R	0.007118	0.098729	0.102282
H114Y	0.00682	0.067736	0.120223
R159K	0.006481	0.102594	0.045746
R159*	0.006439	0.17963	0.110693
T73F	0.006318	0.162865	0.126356
V136I	0.006151	0.208616	0.077896
D132F	0.006055	0.263319	0.079249
K109M	0.006001	0.168435	0.108293
D142T	0.005526	0.150382	0.067758
A117V	0.00531	0.034761	0.059829
D142M	0.005215	0.169715	0.052546
P53I	0.004995	0.276997	0.087682
W30R	0.004823	0.159176	0.108721
V75R	0.004488	0.138702	0.076451
R159S	0.004258	0.184544	0.061322
Y111I	0.003819	0.102799	0.072597
C152L	0.003597	0.141623	0.036933
F137H	0.003419	0.267022	0.129091
A84I	0.00328	0.043265	0.072015
A83W	0.003273	0.056945	0.07154
T73W	0.001897	0.18059	0.063996
K109W	0.001742	0.029168	0.0768
D142Y	0.001691	0.129234	0.076295
E129L	0.000792	0.099446	0.058197
E134L	0.000777	0.093898	0.05879
G51Y	0.000626	0.171268	0.089318
_wt	0	0	0
E157S	-0.000248	0.105707	0.058963
F137M	-0.000501	0.04957	0.07006
R71M	-0.000665	0.235922	0.084913
H114A	-0.001907	0.043739	0.116045
S135L	-0.002016	0.160838	0.085244
L36G	-0.002585	0.140156	0.11056
E118M	-0.002702	0.07203	0.126824
D142W	-0.00301	0.115414	0.039392
F137A	-0.003314	0.23426	0.08545
A143R	-0.003494	0.053436	0.07734
I41L	-0.00467	0.182351	0.073334
W74I	-0.00474	0.112271	0.100723
H114E	-0.005096	0.04055	0.141528
P39M	-0.005227	0.246243	0.130984
E134I	-0.006413	0.108863	0.069432
V119L	-0.007337	0.165124	0.106429
N23Q	-0.007493	0.064838	0.114479
P89L	-0.00769	0.03692	0.08867
V88G	-0.007875	0.025976	0.099611
V88M	-0.00846	0.030462	0.098908
Q108Y	-0.008494	0.039882	0.066524
V75H	-0.008593	0.259013	0.084311
V136S	-0.008746	0.109872	0.081743
R44T	-0.008898	0.138876	0.09505
N34G	-0.009493	0.179861	0.099495
D142S	-0.009923	0.087661	0.076377
E80S	-0.010029	0.137649	0.100422
Q108K	-0.010073	0.033742	0.071558
G86T	-0.010475	0.021862	0.107753
R71W	-0.011158	0.146692	0.104643
D87P	-0.012322	0.03356	0.106628
E134G	-0.01266	0.128125	0.048311
D132W	-0.012801	0.062589	0.059878
T73N	-0.013062	0.153677	0.051444
E134F	-0.013282	0.138856	0.05444
V10E	-0.013394	0.14504	0.117849
D142K	-0.014198	0.198439	0.030194
S135P	-0.014275	0.154992	0.039933
D142G	-0.01442	0.176759	0.0703
I61V	-0.014663	0.211551	0.114946
I60M	-0.014799	0.172353	0.10862
P89Q	-0.014877	0.032299	0.110755
N37V	-0.015162	0.160769	0.103891
S138V	-0.015264	0.148253	0.039299
L24N	-0.015911	0.058333	0.110243
G86M	-0.016029	0.115478	0.136815
R159L	-0.016042	0.312186	0.084809
C152V	-0.016184	0.163741	0.054628
R71L	-0.016637	0.172556	0.087808
V78G	-0.016663	0.31453	0.142728
E139V	-0.017852	0.146022	0.059403
R159C	-0.018007	0.190534	0.076956
P89N	-0.018474	0.064979	0.05198
C152Q	-0.018527	0.040305	0.128173
E134V	-0.018824	0.154873	0.053088
K106A	-0.01888	0.116283	0.155262
A143K	-0.019154	0.074852	0.050892
E118V	-0.019534	0.126718	0.109863
E129P	-0.020253	0.189464	0.072966
D87L	-0.021564	0.079893	0.099251
D87I	-0.022165	0.185857	0.151489
W74H	-0.022558	0.173803	0.170881
L24F	-0.023072	0.209669	0.096065
R71V	-0.023946	0.183507	0.077669
V72P	-0.025074	0.207585	0.121566
A117S	-0.025423	0.095424	0.190126
S138L	-0.025697	0.178956	0.061607
K58W	-0.025996	0.172597	0.08038
R159Y	-0.026041	0.280242	0.132789
A84N	-0.028029	0.012414	0.051065
Y151A	-0.028301	0.386386	0.074639
P25Y	-0.028591	0.016914	0.167531
S3N	-0.028775	0.10346	0.11892
V75K	-0.029694	0.126094	0.087168
G86N	-0.030407	0.061568	0.108728
P89C	-0.031094	0.100081	0.117382
G56Q	-0.031465	0.314441	0.093888
A145F	-0.031965	0.047081	0.030995
D79G	-0.032267	0.134013	0.063326
E134A	-0.03285	0.163899	0.048955
V136T	-0.033815	0.117139	0.071587
D69F	-0.034267	0.142533	0.16057
T73G	-0.034714	0.200292	0.08555
D142N	-0.035526	0.141492	0.077892
R33D	-0.035724	0.156029	0.145391
E80L	-0.036104	0.16153	0.076511
D87W	-0.036324	0.015971	0.092848
P25L	-0.036918	0.130305	0.09462
P66C	-0.036954	0.105291	0.141398
C152I	-0.036998	0.305576	0.054299
G56R	-0.037482	0.13623	0.061063
V136L	-0.038038	0.161302	0.051893
G86H	-0.03827	0.009542	0.114137
F125W	-0.038356	0.232394	0.17213
V88P	-0.038654	0.07684	0.085862
A19M	-0.039054	0.182367	0.07928
C85V	-0.040543	0.012193	0.104127
V136N	-0.040992	0.093269	0.068119
E134N	-0.041207	0.05969	0.043414
G86A	-0.042392	0.066459	0.131659
E101A	-0.042498	0.08014	0.12642
I82V	-0.042969	0.076344	0.091737
P105G	-0.04469	0.051679	0.079621
Q108M	-0.045769	0.009799	0.054538
V119S	-0.04584	0.034962	0.098276
F137K	-0.046305	0.189475	0.077279
E48I	-0.04761	0.145038	0.135676
P89E	-0.048206	0.101978	0.132485
A145Y	-0.048617	0.150061	0.047375
P66Y	-0.048773	0.071468	0.15377
P126I	-0.049486	0.23982	0.07434
R71F	-0.049601	0.120257	0.088749
D87V	-0.050865	0.258223	0.07826
E80V	-0.051802	0.138835	0.052174
D142I	-0.051812	0.101842	0.081541
A84T	-0.052288	0.001557	0.07787
V119P	-0.052993	0.072879	0.069224
L8M	-0.053246	0.156492	0.105277
P89H	-0.053473	0.281966	0.145374
A145Q	-0.054118	0.187282	0.063246
A83Q	-0.054714	0.025788	0.071694
P53C	-0.0549	0.119874	0.111463
V119A	-0.055063	0.143274	0.106416
E101G	-0.05548	0.010611	0.09699
R159D	-0.056774	0.039055	0.100993
T123K	-0.057015	0.069311	0.054379
L36T	-0.057914	0.090827	0.097771
H124I	-0.058446	0.190957	0.055672
V88R	-0.058524	0.004048	0.085378
P105N	-0.058527	0.027519	0.075969
Q108E	-0.058546	0.070605	0.118341
S135V	-0.05896	0.034253	0.069917
P105R	-0.059619	0.064763	0.093592
Y100W	-0.059835	0.027392	0.079347
P21S	-0.060265	0.13117	0.115069
T123V	-0.060348	0.096232	0.064152
N34C	-0.060519	0.226873	0.088491
H124D	-0.061729	0.116576	0.069352
D87M	-0.061896	0.190808	0.125497
E120S	-0.061994	0.023838	0.073028
A84S	-0.062188	0.176038	0.092327
P105E	-0.062649	0.019666	0.086115
K38S	-0.062929	0.175422	0.114243
V40F	-0.063556	0.061175	0.055351
D87R	-0.063876	0.00955	0.065271
G97A	-0.06406	0.136385	0.105822
P105M	-0.064247	0.030192	0.086224
A145N	-0.064704	0.053577	0.076437
R98K	-0.064936	0.003897	0.102716
N23R	-0.064976	0.037602	0.085944
N59H	-0.065396	0.14271	0.102146
V136Q	-0.066273	0.3571	0.101479
D79C	-0.066349	0.045786	0.099644
Q146M	-0.066349	0.140779	0.06314
E80T	-0.066426	0.125581	0.090045
G56F	-0.066951	0.110574	0.094214
N59Q	-0.067889	0.417118	0.078259
S64W	-0.067997	0.206782	0.076405
A26I	-0.068212	0.159601	0.078412
E101R	-0.06831	0.009943	0.084466
N18G	-0.068709	0.115016	0.096482
D79Q	-0.069043	0.187863	0.108423
S150R	-0.069163	0.144727	0.062967
V78L	-0.069228	0.17962	0.065854
R159H	-0.069342	0.106982	0.057583
D69I	-0.069591	0.112437	0.067634
W30K	-0.070518	0.153818	0.145297
P105L	-0.071128	0.053708	0.094467
E157A	-0.071549	0.150956	0.06366
A84V	-0.072113	0.179486	0.077289
D69W	-0.073083	0.207141	0.07292
Q108A	-0.073698	0.01231	0.076286
D69L	-0.07392	0.174243	0.096493
N37S	-0.074286	0.173123	0.114532
N34V	-0.074626	0.126548	0.096028
A81C	-0.074726	0.031928	0.157666
R158K	-0.075	0.113607	0.044094
A145G	-0.076056	0.161014	0.066344
Q108G	-0.076466	0.066232	0.079134
A83C	-0.076634	0.071673	0.133698
P105K	-0.076756	0.084018	0.102493
D69V	-0.077281	0.116797	0.070637
E80F	-0.077401	0.146862	0.077735
Q146T	-0.077812	0.127735	0.0576
P25N	-0.078392	0.17893	0.126863
W30E	-0.079622	0.21771	0.107759
E134S	-0.07967	0.096434	0.054981
E101L	-0.080097	0.002833	0.108427
G86V	-0.080393	0.110845	0.105672
Y151L	-0.081055	0.098482	0.047397
A83K	-0.081151	0.054375	0.07976
E157M	-0.081279	0.066686	0.058496
Q108N	-0.081612	0.015756	0.081935
D142R	-0.081802	0.155247	0.046856
E154F	-0.081936	0.476653	0.107487
E129I	-0.082231	0.229234	0.090051
A145M	-0.082452	0.121375	0.051998
V88N	-0.082466	0.158163	0.126847
E80G	-0.082815	0.137567	0.08899
K38L	-0.083515	0.165928	0.077096
Q102S	-0.083809	0.060899	0.131666
A143E	-0.084856	0.121533	0.067591
D132M	-0.085061	0.141916	0.09497
A143Y	-0.085879	0.008381	0.093789
E157W	-0.086396	0.160244	0.06226
E80M	-0.086757	0.188422	0.08269
S77V	-0.087242	0.231467	0.08156
A143Q	-0.087579	0.068854	0.083015
Q146A	-0.087841	0.08626	0.05274
K106L	-0.088407	0.004007	0.098385
E129A	-0.088496	0.095395	0.078024
N23T	-0.088511	0.297621	0.211598
C85M	-0.088822	0.173849	0.104591
E129T	-0.089123	0.204519	0.05419
E157G	-0.089278	0.618522	0.128639
K109C	-0.089499	0.035371	0.124841
K109V	-0.089548	0.047633	0.10098
N37G	-0.089774	0.122792	0.095657
D79F	-0.090002	0.160664	0.077859
N23E	-0.090003	0.271486	0.136788
H124N	-0.09014	0.184392	0.065811
D69T	-0.090392	0.092436	0.091714
G51W	-0.090911	0.148366	0.087096
Q146V	-0.091315	0.145568	0.041582
C85S	-0.091661	0.114274	0.09449
V99S	-0.091903	0.022932	0.088203
R159V	-0.092048	0.205685	0.070528
K58T	-0.0929	0.141486	0.085906
A145S	-0.093111	0.13704	0.0903
G51L	-0.093918	0.1129	0.095157
S135F	-0.094025	0.297464	0.093571
S77L	-0.094621	0.18572	0.097374
E120W	-0.094737	0.091149	0.122407
G86S	-0.095161	0.132023	0.120976
G86E	-0.095567	0.091546	0.127228
A19S	-0.096437	0.094566	0.122996
N18A	-0.096556	0.174698	0.115135
Q108F	-0.096681	0.040815	0.089556
P126M	-0.097011	0.177903	0.058287
D87T	-0.097067	0.149347	0.119794
Q146S	-0.097947	0.13293	0.085239
Y128R	-0.098362	0.170291	0.076268
E157I	-0.099135	0.123392	0.089342
D87K	-0.09936	0.020279	0.117659
H149T	-0.099702	0.184491	0.053983
E157N	-0.100333	0.067362	0.058593
V99M	-0.100452	0.101725	0.097874
P39F	-0.101545	0.258645	0.124727
I94V	-0.101657	0.117581	0.113352
R71Q	-0.101762	0.190005	0.100169
A145K	-0.101904	0.154081	0.093984
Q146W	-0.102451	0.090352	0.049135
Q146N	-0.104095	0.167147	0.057683
P130Y	-0.104576	0.278041	0.098869
E139H	-0.104699	0.17328	0.083618
S63V	-0.104764	0.191767	0.067031
E101W	-0.106188	0.027037	0.118686
S135H	-0.106602	0.160991	0.062547
P105D	-0.106745	0.088291	0.108384
A84L	-0.107009	0.069089	0.123309
A117R	-0.107311	0.01276	0.113527
A83D	-0.108053	0.02679	0.0687
S64D	-0.108068	0.150027	0.087038
E101S	-0.108556	0.024523	0.052775
N37H	-0.109166	0.128516	0.111036
S64H	-0.110873	0.328064	0.103787
P105W	-0.111801	0.008514	0.090847
P66D	-0.111821	0.231812	0.121967
N37L	-0.111953	0.12485	0.107384
D142C	-0.112108	0.346913	0.05361
Q102G	-0.11254	0.019284	0.084731
N23L	-0.112599	0.176997	0.087606
G86Y	-0.112822	0.190186	0.120208
G56E	-0.113026	0.174817	0.095589
D11S	-0.113029	0.142067	0.114831
F137N	-0.114344	0.162335	0.060455
E134P	-0.114577	0.148126	0.059402
N18R	-0.114838	0.119305	0.087146
K106G	-0.116122	0.035698	0.111049
Q146G	-0.116297	0.155696	0.051342
S49C	-0.116722	0.247089	0.100898
Q108L	-0.117333	0.033506	0.106357
V136F	-0.117389	0.169295	0.057378
A83R	-0.117444	0.084078	0.093922
A117G	-0.11797	0.00125	0.083779
D79W	-0.118523	0.2425	0.097508
Y151M	-0.118803	0.118069	0.073164
R98N	-0.119976	0.080267	0.148473
N34L	-0.121159	0.094055	0.107759
V136E	-0.121279	0.051347	0.067985
E139K	-0.121343	0.164717	0.069671
R12W	-0.121533	0.117527	0.122719
V72N	-0.121916	0.31994	0.111905
R12S	-0.122432	0.180192	0.109707
P105F	-0.122592	0.04497	0.102884
A9V	-0.122972	0.27619	0.136494
F153M	-0.123494	0.239077	0.10772
I82L	-0.123695	0.008529	0.117756
G56M	-0.123708	0.194169	0.085494
V10S	-0.123742	0.166144	0.083998
N34W	-0.124226	0.125502	0.093101
W47K	-0.124248	0.160934	0.103598
C85T	-0.124393	0.093301	0.077745
L112V	-0.124624	0.053549	0.069442
S150W	-0.126247	0.186135	0.044565
R159I	-0.126949	0.21936	0.085157
E80K	-0.127609	0.115126	0.074312
L36I	-0.127617	0.156397	0.113523
A26F	-0.127911	0.152625	0.084308
T73D	-0.129526	0.24834	0.098473
P105I	-0.129694	0.067508	0.109217
A143V	-0.130041	0.100159	0.06775
F137E	-0.130253	0.142228	0.043534
D87S	-0.130692	0.159185	0.108369
M16W	-0.13086	0.153289	0.102847
S77A	-0.133144	0.136755	0.122458
A143D	-0.13329	0.107305	0.079704
A145C	-0.133567	0.08746	0.082091
N59G	-0.133992	0.145597	0.074963
R44M	-0.134226	0.132455	0.082588
E157V	-0.134461	0.110637	0.053594
Y111F	-0.135088	0.196294	0.237195
E120V	-0.135624	0.007309	0.087122
L36W	-0.135795	0.116453	0.100374
K106Q	-0.136411	0.066592	0.082505
P105V	-0.136874	0.046363	0.117919
D79L	-0.137862	0.128775	0.089081
P25S	-0.138605	0.102276	0.104392
K109T	-0.139806	0.073477	0.098112
F153C	-0.139824	0.28214	0.138776
H149R	-0.140769	0.145645	0.07036
A143S	-0.141467	0.041277	0.063304
A145V	-0.141742	0.133137	0.033819
F103L	-0.142041	0.037375	0.116285
G56Y	-0.142827	0.063897	0.105132
Y128M	-0.142835	0.046032	0.06807
N59L	-0.143028	0.172025	0.087669
E80I	-0.14326	0.058136	0.109792
F140H	-0.143307	0.563959	0.194947
K109A	-0.143575	0.091714	0.081161
N34E	-0.143655	0.126167	0.111215
T123S	-0.144273	0.370344	0.123077
A9I	-0.145609	0.187375	0.182492
A145I	-0.145793	0.232822	0.068326
A145P	-0.145865	0.063855	0.06222
I155L	-0.145886	0.260165	0.076245
P89V	-0.146634	0.101148	0.118913
A19Q	-0.148219	0.076697	0.100164
H141G	-0.148413	0.210924	0.067897
E80C	-0.148485	0.214219	0.101397
Q146Y	-0.148565	0.126408	0.058674
R44Q	-0.148699	0.169366	0.06516
V93C	-0.149506	0.032294	0.132163
G86L	-0.150087	0.060724	0.118283
N18E	-0.151521	0.162315	0.091718
Q102R	-0.151899	0.088357	0.108599
W74F	-0.152078	0.480659	0.233293
R158H	-0.152183	0.230763	0.102676
R52Y	-0.152822	0.144874	0.112897
A84M	-0.152951	0.093239	0.076553
D131F	-0.153116	0.201885	0.298608
E80R	-0.153606	0.136375	0.054284
P105Y	-0.154021	0.116623	0.159207
G51M	-0.154124	0.124881	0.107129
A117E	-0.154776	0.059678	0.110538
K38Y	-0.154913	0.225882	0.053514
G56K	-0.154947	0.197253	0.104265
G67F	-0.156035	0.144652	0.104301
A6G	-0.156135	0.113273	0.111967
D132C	-0.156156	0.154242	0.061404
L54F	-0.157855	0.36426	0.105028
A143M	-0.159332	0.177334	0.052931
W30P	-0.159715	0.334492	0.236836
V75A	-0.159879	0.222944	0.122303
G86C	-0.160833	0.056642	0.084298
T113V	-0.161203	0.114768	0.135258
G97E	-0.161342	0.166191	0.069972
K58G	-0.161384	0.090482	0.08085
F137W	-0.161464	0.103505	0.096052
P89G	-0.16157	0.008169	0.083741
Q108V	-0.161622	0.025781	0.070315
G86K	-0.161947	0.009241	0.097757
N37T	-0.162793	0.069096	0.109172
E129N	-0.163168	0.138039	0.065852
P21A	-0.163559	0.108652	0.121257
E139I	-0.163956	0.196375	0.075762
D131L	-0.164192	0.139146	0.075981
L36E	-0.165194	0.088115	0.106827
K32V	-0.165511	0.139683	0.107852
I115V	-0.165583	0.007516	0.078679
E90H	-0.165867	0.066348	0.200175
D69R	-0.167012	0.160411	0.066854
N147Q	-0.16704	0.13159	0.066822
L8K	-0.167194	0.118752	0.107993
G67H	-0.167268	0.184429	0.13464
A143F	-0.167589	0.159132	0.049707
E134T	-0.167805	0.180345	0.085354
V13S	-0.168006	0.214746	0.098146
G51F	-0.16966	0.230972	0.080731
V72H	-0.170028	0.070039	0.123928
P105S	-0.170776	0.02427	0.102714
K38F	-0.171105	0.203884	0.139219
A9L	-0.171316	0.178353	0.108605
C152E	-0.17141	0.196838	0.053604
P89R	-0.17386	0.060944	0.088565
A117M	-0.174678	0.014181	0.04402
V78I	-0.174847	0.228537	0.094958
S150A	-0.176093	0.204656	0.086636
Q146I	-0.176383	0.164504	0.05478
E139T	-0.176452	0.208052	0.055275
Q108D	-0.176729	0.157104	0.150606
E101N	-0.177659	0.051098	0.087465
S150D	-0.177905	0.148563	0.070932
P126T	-0.178026	0.012961	0.130541
V93A	-0.178117	0.109489	0.095394
D69N	-0.178339	0.364512	0.197407
D144S	-0.178688	0.108611	0.06863
P105*	-0.179496	0.046913	0.204757
E139N	-0.179566	0.112413	0.064996
E139A	-0.180805	0.378938	0.123265
E118Y	-0.181179	0.472265	0.317681
E80A	-0.181333	0.094884	0.088061
R52P	-0.181556	0.156875	0.080455
R71Y	-0.181584	0.188264	0.115309
G56T	-0.182016	0.175164	0.102171
A145T	-0.182291	0.191571	0.13611
A143I	-0.182687	0.280978	0.07654
H124M	-0.182815	0.261658	0.100141
A19K	-0.182939	0.144487	0.105283
S49G	-0.184285	0.112512	0.056742
A83G	-0.184359	0.023958	0.129339
E157H	-0.184503	0.227963	0.088057
H124L	-0.184673	0.03607	0.059733
L156S	-0.18511	0.196425	0.050013
E101M	-0.185949	0.15847	0.122739
G56L	-0.18698	0.167797	0.127006
S150K	-0.188311	0.136667	0.050505
I155V	-0.188901	0.10401	0.053819
H141I	-0.189969	0.253228	0.091851
D11T	-0.190189	0.130758	0.105175
F103M	-0.19024	0.134813	0.090307
G56C	-0.190651	0.265044	0.102325
A143L	-0.191655	0.179118	0.051735
A143G	-0.191794	0.128977	0.068686
Y111L	-0.191911	0.130883	0.077103
A143C	-0.192107	0.422954	0.122474
A107I	-0.192709	0.214109	0.123505
V136D	-0.193552	0.110258	0.069774
P89I	-0.193978	0.028954	0.075551
P89S	-0.194153	0.052105	0.111926
E139L	-0.194203	0.150117	0.060515
F125L	-0.195419	0.210651	0.047732
Q65G	-0.195536	0.189206	0.080464
T113C	-0.197052	0.225415	0.095709
V88K	-0.197527	0.017815	0.082618
G56V	-0.197856	0.170129	0.086476
Y151W	-0.198295	0.051774	0.078762
N37D	-0.199348	0.152115	0.092638
D69Q	-0.199602	0.189697	0.097967
P25D	-0.201597	0.056979	0.14219
E139S	-0.201797	0.073014	0.068616
E139C	-0.203293	0.234314	0.085665
E101K	-0.203613	0.065137	0.071105
Q146L	-0.204237	0.167552	0.048558
P126A	-0.204353	0.16656	0.167226
E101V	-0.204637	0.025217	0.087164
E154W	-0.204776	0.223565	0.069552
A143N	-0.20509	0.092694	0.087556
I82T	-0.205815	0.272443	0.151192
W74L	-0.206225	0.133884	0.094749
R158C	-0.206363	0.220341	0.100221
A26Y	-0.20705	0.217127	0.123185
A117H	-0.208206	0.023531	0.102116
V93I	-0.208484	0.130812	0.092805
D131N	-0.208611	0.133005	0.058783
W30Q	-0.210441	0.159006	0.087879
F103P	-0.21243	0.168793	0.30521
N147S	-0.212517	0.081665	0.059021
N59F	-0.212755	0.106078	0.076789
G86I	-0.213863	0.187726	0.123623
A145D	-0.214251	0.294192	0.065844
V72Q	-0.214368	0.104472	0.119894
E157T	-0.214711	0.147383	0.056475
P89K	-0.214991	0.010843	0.145689
R12D	-0.221175	0.129408	0.122933
R44V	-0.22165	0.184194	0.078067
D79M	-0.22204	0.196607	0.078058
Q108W	-0.222188	0.049713	0.125055
D87C	-0.222799	0.124271	0.133086
I91K	-0.222942	0.109862	0.065737
F103A	-0.223042	0.045855	0.097268
L156H	-0.223554	0.026276	0.057779
A29T	-0.224054	0.053398	0.127745
Q65M	-0.224153	0.208089	0.066762
A143T	-0.225915	0.133489	0.05926
E139R	-0.229089	0.19646	0.058172
V136G	-0.229593	0.1268	0.054089
P39S	-0.230572	0.159608	0.124372
A145L	-0.230749	0.160257	0.072276
K106M	-0.231192	0.006137	0.079281
F103T	-0.233241	0.036229	0.081415
D131K	-0.234297	0.138992	0.048198
V10G	-0.234825	0.134201	0.10207
H124P	-0.236569	0.194779	0.052074
E157F	-0.236675	0.26992	0.072135
L24D	-0.237772	0.058451	0.122047
A143W	-0.238867	0.122137	0.069101
G86D	-0.239054	0.015634	0.120032
A145R	-0.239492	0.147392	0.063304
P25H	-0.240007	0.237084	0.114354
T46C	-0.242162	0.230286	0.094755
E139M	-0.242283	0.189458	0.061634
L156W	-0.242707	0.278489	0.036768
N23W	-0.243929	0.070745	0.103423
E139Q	-0.244273	0.042228	0.093001
D144N	-0.244594	0.173515	0.045939
E157L	-0.246548	0.050358	0.071165
I115T	-0.248654	0.072261	0.08984
E157Y	-0.249364	0.057141	0.09502
S150H	-0.249619	0.057395	0.066945
N59E	-0.251131	0.194486	0.0649
A29W	-0.251348	0.111655	0.114787
D11P	-0.252782	0.06434	0.082984
S138D	-0.253986	0.119233	0.080877
R44F	-0.254342	0.217659	0.059867
S150G	-0.254582	0.184981	0.045976
P25E	-0.255931	0.135551	0.101188
A145W	-0.256611	0.157342	0.052957
A6M	-0.257144	0.148623	0.1519
I91Y	-0.257916	0.211261	0.128638
S77I	-0.25792	0.324279	0.0934
D116P	-0.258164	0.092126	0.068974
V136W	-0.25896	0.272708	0.080079
R158M	-0.258994	0.111538	0.081126
N37A	-0.26075	0.079577	0.092226
F153I	-0.26077	0.072602	0.096291
F153H	-0.261771	0.157986	0.103067
S150E	-0.262809	0.151634	0.053896
A84Q	-0.263193	0.064715	0.089141
H141W	-0.263629	0.028319	0.058658
K38I	-0.26658	0.252576	0.071646
A84K	-0.266701	0.026152	0.066997
N18C	-0.268212	0.140395	0.084912
P89D	-0.268246	0.112409	0.123428
E139F	-0.268528	0.171263	0.029986
L110V	-0.268668	0.026157	0.118918
A29F	-0.269226	0.146467	0.107959
H141F	-0.270396	0.126197	0.047411
C85G	-0.27098	0.052923	0.096075
S63Q	-0.272027	0.291472	0.078293
S138Y	-0.272849	0.060937	0.036435
N34M	-0.273583	0.106584	0.099261
F153Y	-0.274772	0.468088	0.084459
P25W	-0.276401	0.095872	0.093967
Q108I	-0.276837	0.002792	0.119114
A26P	-0.277907	0.245394	0.110385
G67R	-0.279965	0.184071	0.092272
E154G	-0.280319	0.071929	0.115
H149C	-0.282368	0.078848	0.075218
V10N	-0.282544	0.258363	0.117875
A9G	-0.28277	0.201633	0.117059
L110C	-0.284711	0.192641	0.187712
P126S	-0.286013	0.229454	0.089676
W74A	-0.287407	0.263372	0.050593
P39W	-0.289355	0.172637	0.125131
F103V	-0.290052	0.104329	0.084257
N59M	-0.290341	0.136548	0.10711
H141R	-0.291062	0.317037	0.085533
L110F	-0.291279	0.088768	0.162935
L156A	-0.291654	0.340957	0.107898
Q108C	-0.291779	0.012422	0.128627
D69K	-0.291893	0.152982	0.086723
R98T	-0.29194	0.04165	0.081366
P66H	-0.292457	0.286095	0.169228
F31Y	-0.294443	0.118101	0.102769
R44Y	-0.295064	0.137867	0.10502
R12V	-0.295506	0.124684	0.095294
S138A	-0.297858	0.21898	0.098842
M16Q	-0.298113	0.122962	0.114245
V119W	-0.298751	0.04393	0.080037
Y128V	-0.298759	0.086939	0.029074
E17A	-0.299346	0.054921	0.09333
N34A	-0.300393	0.052638	0.137133
G97S	-0.300536	0.149248	0.063221
L24C	-0.300868	0.097579	0.13441
S49V	-0.300915	0.172986	0.058738
K38H	-0.302045	0.124479	0.095058
W30T	-0.302502	0.178182	0.083257
V136Y	-0.303073	0.359839	0.063833
T73P	-0.303772	0.216832	0.064291
V10D	-0.306959	0.106542	0.089265
N147T	-0.307032	0.156584	0.051891
A84Y	-0.307702	0.032244	0.117283
S150Y	-0.310619	0.092709	0.102258
F137G	-0.312243	0.128607	0.047396
E139G	-0.31511	0.196381	0.05046
E90C	-0.316121	0.004849	0.112402
V75F	-0.316969	0.123753	0.071485
H141V	-0.318137	0.163752	0.036402
E101C	-0.319577	0.10074	0.159649
Y128T	-0.32106	0.088189	0.06338
H45W	-0.32138	0.217431	0.060802
Y151R	-0.322565	0.272228	0.067042
D131R	-0.32415	0.013632	0.063742
V40S	-0.326386	0.098434	0.104208
N34F	-0.32652	0.19705	0.114023
Y111M	-0.326762	0.038026	0.078564
S150T	-0.327025	0.146124	0.072348
N34T	-0.327035	0.138169	0.103517
A143H	-0.327531	0.227658	0.034056
P39I	-0.327613	0.234901	0.08515
E139W	-0.328926	0.122926	0.033211
S135C	-0.329804	0.216148	0.120573
F103W	-0.331721	0.048147	0.078864
A117C	-0.332107	0.040523	0.109946
T35C	-0.333054	0.202431	0.10231
H141M	-0.336196	0.114625	0.054491
Q146P	-0.336431	0.058585	0.058382
G67W	-0.33646	0.081388	0.083782
S49D	-0.336517	0.178721	0.08913
V75Q	-0.337352	0.072063	0.058811
A84R	-0.337546	0.036121	0.089334
A6Y	-0.337966	0.206801	0.13813
I50*	-0.337971	0.647984	0.306637
N18W	-0.338849	0.084464	0.079705
I82E	-0.338908	0.023502	0.077005
K38A	-0.339272	0.098513	0.086006
E17S	-0.33966	0.116828	0.09002
Y151F	-0.340418	0.119836	0.057067
A6N	-0.340669	0.041041	0.118931
R158L	-0.341567	0.17357	0.059346
P25G	-0.342756	0.08832	0.094122
K32S	-0.343035	0.068769	0.104707
N37C	-0.343272	0.113307	0.116933
S150F	-0.343494	0.113715	0.056778
P39E	-0.34442	0.179682	0.144387
L24S	-0.344953	0.039964	0.103933
W30A	-0.345249	0.155439	0.098266
P126K	-0.345253	0.274492	0.088524
F153T	-0.347512	0.227576	0.063331
H45C	-0.34799	0.076655	0.085791
W74S	-0.348753	0.098433	0.178383
R158I	-0.349655	0.059657	0.089536
A107S	-0.350136	0.126757	0.245882
D144C	-0.351153	0.184558	0.094077
L36D	-0.35232	0.197221	0.133231
Q146R	-0.352695	0.166038	0.047394
P126N	-0.353818	0.141336	0.053391
E101I	-0.354074	0.012676	0.091892
G97R	-0.354243	0.084991	0.105317
A19L	-0.354989	0.082601	0.095396
S135D	-0.35512	0.328014	0.126482
G97M	-0.356632	0.165184	0.067746
I82W	-0.358212	0.056436	0.050618
I155T	-0.358459	0.127162	0.065747
Y128L	-0.359565	0.102254	0.029839
G67*	-0.360644	0.275932	0.327268
D69M	-0.361419	0.119038	0.134458
V40Q	-0.363085	0.069425	0.087067
A81V	-0.363104	0.082203	0.090204
A81G	-0.36345	0.46997	0.135148
I82Q	-0.363686	0.009063	0.074129
M92W	-0.365348	0.023597	0.076912
I155Q	-0.365768	0.261749	0.107157
K38G	-0.366137	0.149579	0.101453
P89F	-0.36666	0.016303	0.295771
Y128P	-0.367395	0.196779	0.090105
A117N	-0.367961	0.033559	0.099965
H141S	-0.371841	0.178459	0.058179
D11M	-0.372311	0.108947	0.121593
G97T	-0.373001	0.121867	0.087108
G97N	-0.37322	0.025592	0.070604
R158F	-0.37359	0.210869	0.084844
F31M	-0.374729	0.212003	0.072028
E101T	-0.375312	0.04772	0.095091
N18S	-0.375455	0.049899	0.084458
V13C	-0.375698	0.202479	0.115637
H45K	-0.376337	0.136182	0.093622
H141A	-0.376428	0.156734	0.053413
K38V	-0.376763	0.162432	0.104212
V119K	-0.377203	0.007442	0.067547
S138W	-0.377816	0.064631	0.066434
H141K	-0.378464	0.092701	0.065928
H45L	-0.381552	0.189136	0.077294
E80W	-0.383331	0.134301	0.071859
N23F	-0.385373	0.049923	0.127852
A143P	-0.385739	0.095011	0.056203
A84D	-0.387932	0.014104	0.06194
G86F	-0.389047	0.105468	0.124679
G43V	-0.389259	0.661606	0.22895
Y151S	-0.391616	0.232744	0.046026
K32A	-0.392873	0.09196	0.097773
V75Y	-0.394349	0.167345	0.125406
V119D	-0.396421	0.073576	0.114378
R33W	-0.397222	0.091841	0.117626
R158S	-0.397252	0.105573	0.069771
E80N	-0.397725	0.109845	0.14143
S138G	-0.39782	0.136765	0.043587
Y128S	-0.398151	0.133623	0.084659
H149E	-0.398491	0.300597	0.076484
S138H	-0.401862	0.148159	0.096752
L112C	-0.401964	0.126365	0.063222
R158V	-0.402958	0.113962	0.044909
D144Q	-0.404707	0.104518	0.056291
C85Y	-0.408251	0.013644	0.250861
E17N	-0.408355	0.139435	0.097994
V13M	-0.408769	0.152397	0.088874
V10Y	-0.409338	0.175822	0.111617
S150V	-0.410303	0.203432	0.05903
H45M	-0.4126	0.139881	0.088269
H124E	-0.416597	0.089499	0.069564
D144T	-0.417049	0.311082	0.061101
R158A	-0.417166	0.086866	0.049085
A29K	-0.417887	0.119943	0.126106
F153V	-0.418733	0.253264	0.066947
R158Y	-0.419169	0.13959	0.096642
P25R	-0.420251	0.13471	0.126195
D131I	-0.420819	0.119707	0.094294
K106P	-0.422396	0.07952	0.081368
Y111C	-0.423455	0.07672	0.180046
L54V	-0.425067	0.438357	0.149852
G56I	-0.425383	0.340956	0.126863
I91W	-0.426227	0.132936	0.113814
P21V	-0.426365	0.087489	0.091081
A84G	-0.426821	0.07831	0.091656
P39L	-0.429548	0.206062	0.153532
M16L	-0.430085	0.127507	0.181604
S3I	-0.430292	0.122927	0.091162
I155K	-0.431868	0.120117	0.055832
M42S	-0.433311	0.33933	0.093819
H45R	-0.436191	0.113464	0.079484
A117T	-0.437903	0.022477	0.0666
N23S	-0.439904	0.171348	0.141415
H45E	-0.440654	0.067123	0.061152
D144A	-0.44162	0.073079	0.087597
W47S	-0.441855	0.180533	0.057773
F137D	-0.442295	0.20433	0.091778
K32Y	-0.442591	0.087542	0.114243
K109P	-0.443486	0.207652	0.141163
L4V	-0.446051	0.227138	0.117707
G86W	-0.446343	0.248101	0.174941
V13F	-0.449714	0.222895	0.100053
D131T	-0.452569	0.293351	0.068075
W47V	-0.457544	0.127269	0.092765
I82Y	-0.45905	0.327116	0.162722
N37I	-0.459858	0.208097	0.097243
F31L	-0.460401	0.161143	0.110372
K32Q	-0.4605	0.108963	0.098968
A84W	-0.461154	0.249365	0.189942
V99T	-0.461386	0.150217	0.101238
R158N	-0.462217	0.171374	0.046931
E139Y	-0.462913	0.423179	0.209646
R158T	-0.465481	0.192519	0.087843
I50T	-0.466208	0.200601	0.080195
K32R	-0.467967	0.077346	0.089839
M92S	-0.468408	0.052335	0.110099
L156C	-0.468577	0.046378	0.081462
N59W	-0.470024	0.126611	0.082706
R98S	-0.470097	0.038172	0.087539
N147C	-0.470931	0.112493	0.076603
V13L	-0.471101	0.127133	0.094677
V72D	-0.471283	0.218741	0.113871
V13A	-0.4723	0.122549	0.120343
N147E	-0.4725	0.171291	0.047728
S150P	-0.473215	0.204521	0.05995
F31P	-0.476073	0.091524	0.374537
H141T	-0.476963	0.129268	0.054834
Y128K	-0.47943	0.158345	0.061808
A29V	-0.480404	0.124734	0.115279
L62T	-0.480525	0.139517	0.104342
A29G	-0.480965	0.156247	0.09324
D144V	-0.48165	0.111164	0.106272
D131M	-0.482553	0.179057	0.053824
M16T	-0.483082	0.200236	0.174848
L8W	-0.485351	0.066582	0.102902
S63M	-0.488024	0.237261	0.119468
S150M	-0.489993	0.077536	0.066882
P126D	-0.490782	0.586948	0.062324
L156V	-0.490955	0.133858	0.101038
K38M	-0.492961	0.017674	0.136521
I82A	-0.492973	0.013941	0.119674
A19R	-0.499252	0.110437	0.088941
P25V	-0.499262	0.114694	0.087737
P21N	-0.499837	0.145546	0.080594
R44I	-0.502879	0.091124	0.07132
I155R	-0.503537	0.144755	0.048728
P25K	-0.504462	0.133021	0.092869
V119H	-0.506253	0.107984	0.096244
V136P	-0.506308	0.071866	0.057322
D131H	-0.506381	0.278379	0.083266
L8A	-0.509315	0.13768	0.142111
P126Y	-0.514913	0.368641	0.037513
V75G	-0.518746	0.089606	0.125411
I155E	-0.51975	0.179102	0.030002
A117K	-0.520263	0.006893	0.071135
P21G	-0.52181	0.082093	0.105219
R98L	-0.525989	0.000265	0.075273
L28M	-0.526563	0.098871	0.096208
D144H	-0.52724	0.233325	0.052806
I41A	-0.529057	0.133514	0.091381
D131G	-0.536278	0.08534	0.060528
H141C	-0.537113	0.207042	0.114499
D131S	-0.539924	0.192935	0.087812
T35S	-0.540171	0.118047	0.100485
H114G	-0.540527	0.067819	0.043278
D131A	-0.542665	0.128093	0.105127
W74N	-0.542865	0.266901	0.124394
V13W	-0.543463	0.125888	0.159152
P39Q	-0.544435	0.191571	0.119735
I115E	-0.54991	0.26441	0.196315
K32M	-0.55125	0.173125	0.086183
I115A	-0.553522	0.057	0.060833
P126L	-0.555669	0.174657	0.082562
D131V	-0.556343	0.329137	0.056592
L8V	-0.557159	0.074917	0.111913
V99N	-0.562203	0.044431	0.108431
I91Q	-0.565748	0.174218	0.155738
H45F	-0.566538	0.143287	0.045832
K32G	-0.56699	0.097767	0.090124
P126H	-0.567941	0.403145	0.098997
H149K	-0.568228	0.100967	0.085508
V72E	-0.573928	0.166364	0.111003
W47R	-0.574301	0.262623	0.148282
F153N	-0.574928	0.242176	0.049176
I94C	-0.578068	0.176467	0.10232
P126G	-0.579099	0.24997	0.034347
M42A	-0.58006	0.078086	0.054347
R98D	-0.580241	0.12789	0.123226
I94A	-0.581371	0.281812	0.122629
I155C	-0.581784	0.39888	0.127766
C85P	-0.581943	0.004125	0.0612
V10C	-0.582307	0.239595	0.217328
I60P	-0.582837	0.394925	0.269118
E120A	-0.583538	0.022525	0.080064
P25A	-0.583924	0.114435	0.122751
P39K	-0.587029	0.154754	0.15337
R158G	-0.588658	0.106644	0.073812
T123C	-0.588779	0.240321	0.13316
D11N	-0.591212	0.01217	0.095633
R158P	-0.592272	0.11665	0.070581
F153W	-0.59334	0.385125	0.095802
A19E	-0.594182	0.097156	0.100046
L8E	-0.598136	0.059414	0.091181
A29R	-0.599256	0.189918	0.080277
A117L	-0.60195	0.019035	0.081352
G97K	-0.604638	0.060208	0.096407
Q65P	-0.606318	0.249735	0.099644
R12F	-0.607561	0.03983	0.13768
D11C	-0.608299	0.158	0.130436
A29H	-0.608891	0.109133	0.109804
H45Y	-0.611281	0.257506	0.087658
L156N	-0.612339	0.185377	0.096833
E90Q	-0.613416	0.076091	0.13127
I60T	-0.615453	0.188388	0.085507
P39G	-0.619677	0.085893	0.110726
E80Y	-0.621841	0.297126	0.148584
I41M	-0.625897	0.180363	0.062636
N23P	-0.628574	0.165599	0.102037
L62A	-0.6288	0.251151	0.12386
A26Q	-0.635558	0.095301	0.086372
A81T	-0.636038	0.161775	0.110924
R98V	-0.636501	0.003434	0.090878
I41E	-0.638152	0.516577	0.13871
C85H	-0.638417	0.086593	0.078647
A29S	-0.639085	0.160452	0.097487
I82R	-0.639135	0.120186	0.110682
W74Q	-0.64192	0.305764	0.114581
E90M	-0.643958	0.016607	0.05312
A26L	-0.644414	0.142896	0.113781
W133N	-0.644455	0.321236	0.302988
S63W	-0.647341	0.26966	0.098802
V13E	-0.647397	0.047813	0.1223
A6L	-0.647667	0.073589	0.107302
M92Q	-0.650819	0.125119	0.093037
P126R	-0.651851	0.29803	0.062506
Y111W	-0.655236	0.002361	0.138059
I5F	-0.657419	0.169752	0.097806
S138F	-0.658948	0.102179	0.130008
W30G	-0.661959	0.097685	0.110959
H141L	-0.661996	0.182355	0.049242
I115S	-0.663181	0.146954	0.165321
A7I	-0.664776	0.022328	0.131307
D144K	-0.666946	0.194514	0.087622
D131Q	-0.668545	0.040472	0.103352
I14T	-0.668599	0.186723	0.097425
D144M	-0.672756	0.238287	0.110704
G97C	-0.673807	0.431571	0.114023
L8Q	-0.675223	0.1014	0.075864
E120P	-0.675301	0.181964	0.075014
I82K	-0.679099	0.022823	0.081683
I82S	-0.680375	0.331306	0.101512
K32T	-0.684447	0.224035	0.144062
S150L	-0.68505	0.184194	0.064489
R44E	-0.685775	0.180379	0.056245
K32C	-0.686179	0.044212	0.144411
H149A	-0.687075	0.014271	0.09464
S63H	-0.69157	0.205389	0.061668
H124F	-0.691988	0.193372	0.078528
P126W	-0.69284	0.231091	0.065779
D11L	-0.695295	0.145395	0.107348
V10I	-0.695512	0.156334	0.148674
R44L	-0.696034	0.189121	0.058226
L62Y	-0.696317	0.212344	0.10099
L8R	-0.696901	0.039293	0.08233
I91R	-0.69996	0.012726	0.097615
K38W	-0.700375	0.14906	0.147494
S49E	-0.700511	0.157156	0.07614
N147M	-0.701272	0.07236	0.070939
N59D	-0.70326	0.263764	0.078862
I94P	-0.704626	0.09422	0.29456
H141E	-0.704759	0.178275	0.059942
G97D	-0.70942	0.146437	0.089159
V93T	-0.711185	0.073506	0.086138
S150Q	-0.711821	0.112433	0.11601
R44*	-0.715609	0.293095	0.269159
L8H	-0.715654	0.209562	0.097389
K32E	-0.719768	0.176571	0.114859
P126E	-0.720402	0.216179	0.058063
S63R	-0.72163	0.322325	0.085887
F153Q	-0.721984	0.298596	0.087429
C85N	-0.722867	0.187077	0.077877
V72R	-0.725735	0.173552	0.043136
P21T	-0.726403	0.090139	0.101916
N147G	-0.726558	0.08579	0.058323
I115H	-0.727534	0.286114	0.060583
L54C	-0.732354	0.513502	0.18726
R12A	-0.734198	0.061152	0.097579
Y151K	-0.735056	0.23064	0.05414
W133L	-0.735077	0.24452	0.058822
S148D	-0.735777	0.059655	0.087746
Y128G	-0.737934	0.121832	0.075137
L156T	-0.738238	0.190079	0.084698
K32F	-0.738327	0.053851	0.093171
R12T	-0.738355	0.102204	0.105548
Y100M	-0.738431	0.075172	0.088667
H124Y	-0.740687	0.151134	0.081753
D144F	-0.741056	0.097678	0.049638
I5L	-0.741685	0.13782	0.093399
R98M	-0.744738	0.030162	0.099002
A81S	-0.746016	0.08354	0.083008
P21R	-0.747407	0.091098	0.074981
I155A	-0.749296	0.21253	0.075389
V10H	-0.750381	0.18852	0.117738
K109G	-0.753198	0.090824	0.077034
S135A	-0.753292	0.331067	0.081192
L36V	-0.753545	0.063562	0.114151
E90A	-0.753776	0.101509	0.081496
W30V	-0.757527	0.155811	0.105139
A81I	-0.757611	0.21627	0.092169
I115P	-0.758366	0.326021	0.137677
E90S	-0.758698	0.011377	0.110778
D144W	-0.761028	0.043555	0.070105
V40N	-0.761796	0.056782	0.139536
R44W	-0.762202	0.306631	0.083601
S49F	-0.76239	0.19169	0.101488
V75W	-0.766435	0.210954	0.095949
W30I	-0.766562	0.138532	0.082429
R98E	-0.768287	0.038874	0.140209
D11W	-0.770217	0.127124	0.084117
R33G	-0.777117	0.08699	0.091067
D11H	-0.781355	0.03665	0.157449
H45D	-0.787328	0.269566	0.07647
K38E	-0.788238	0.373655	0.102707
Y128Q	-0.788475	0.184327	0.119261
E17C	-0.789798	0.074478	0.122317
I60H	-0.792505	0.398249	0.104842
N147V	-0.792741	0.120967	0.052552
A29M	-0.794674	0.161851	0.208884
K32H	-0.796011	0.246342	0.125614
P55*	-0.799721	0.656458	0.363324
D144R	-0.80426	0.14048	0.045356
M16*	-0.807113	0.073436	0.236611
Y100L	-0.80779	0.039982	0.08329
S63Y	-0.808034	0.338939	0.109025
L54I	-0.809292	0.163266	0.125836
A29C	-0.812044	0.152405	0.150611
M16D	-0.813055	0.050698	0.097947
P25Q	-0.814166	0.200407	0.091518
K38D	-0.815875	0.150261	0.132953
T46F	-0.817286	0.604139	0.17942
R98Q	-0.817977	0.048078	0.090638
S49N	-0.823037	0.082212	0.080944
A117W	-0.825142	0.085802	0.089854
R44D	-0.82613	0.116161	0.092106
E90N	-0.827651	0.039609	0.137777
I41G	-0.830756	0.24029	0.265951
G97H	-0.832245	0.140909	0.078219
R158E	-0.833258	0.48964	0.051189
N18V	-0.834704	0.065135	0.096412
I82H	-0.8371	0.001789	0.18577
P21L	-0.842485	0.178406	0.086846
D144Y	-0.842774	0.221092	0.063118
I94T	-0.843572	0.012101	0.104184
V119Y	-0.843585	0.048644	0.142576
A7S	-0.844725	0.173868	0.096011
V119G	-0.84562	0.082745	0.124066
E90I	-0.846021	0.011197	0.083065
S64P	-0.851762	0.200866	0.131422
S3E	-0.852661	0.164682	0.087087
D144L	-0.854813	0.258701	0.06212
W133M	-0.855405	0.120171	0.044747
V13N	-0.856311	0.135996	0.109287
V10T	-0.858788	0.13552	0.072858
A7T	-0.858938	0.173867	0.08384
F103S	-0.85987	0.083111	0.077827
Y128A	-0.860926	0.225562	0.126133
W47N	-0.86157	0.017414	0.07354
L36A	-0.862903	0.030173	0.097204
V10F	-0.867639	0.114526	0.146351
L8S	-0.868615	0.064988	0.110454
F153R	-0.868641	0.062364	0.087167
G97Y	-0.868868	0.038427	0.087436
A19V	-0.873132	0.117427	0.155567
L8Y	-0.87429	0.262304	0.139864
L62W	-0.875326	0.200145	0.118317
A26T	-0.875787	0.004941	0.133619
E17L	-0.877745	0.05563	0.112423
H45V	-0.882038	0.069089	0.090385
F153G	-0.882162	0.290077	0.245087
P21I	-0.883392	0.038079	0.066096
V13Q	-0.885496	0.080831	0.095023
Y128E	-0.887132	0.085906	0.089384
G43K	-0.891816	0.109906	0.231256
A9F	-0.894677	0.032724	0.11291
N147R	-0.895691	0.157193	0.042895
A7N	-0.899199	0.101726	0.096801
Y100A	-0.905736	0.007891	0.091843
H124W	-0.911666	0.066543	0.070929
L36C	-0.913133	0.077015	0.136298
D11V	-0.917942	0.148072	0.113991
T123H	-0.920332	0.230695	0.06142
N59R	-0.924884	0.115636	0.066385
A7V	-0.927167	0.112743	0.089579
V99R	-0.937051	0.367305	0.280005
Y151N	-0.938451	0.140731	0.055335
E48*	-0.939617	0.211808	0.283389
A26G	-0.941915	0.072245	0.081408
T123Q	-0.945019	0.085518	0.105108
L104C	-0.946891	0.145538	0.234601
D122T	-0.950228	0.219257	0.068499
W74K	-0.952531	0.255098	0.053696
I155F	-0.953509	0.111409	0.102459
P39R	-0.954932	0.197107	0.113997
H149G	-0.95529	0.040745	0.044637
L104A	-0.956259	0.033092	0.357289
S49I	-0.956594	0.206814	0.086782
C85Q	-0.958285	0.059349	0.099038
K109Y	-0.958363	0.184266	0.180429
I60E	-0.965677	0.272471	0.287521
F153S	-0.965759	0.066007	0.086542
S77P	-0.966242	0.637824	0.214343
A26N	-0.968271	0.281894	0.166984
H141P	-0.973642	0.119457	0.10402
I155H	-0.978671	0.268169	0.083177
G97F	-0.981954	0.03944	0.086924
G43W	-0.983293	0.234069	0.39796
A81M	-0.983876	0.065484	0.119246
W30D	-0.984803	0.357883	0.130424
V75N	-0.98553	0.220056	0.102325
E80P	-0.986933	0.107936	0.114993
L104G	-0.989691	0.237731	0.090666
I50A	-0.991149	0.185354	0.095273
I155Y	-0.991584	0.047589	0.063129
F153A	-0.997923	0.302345	0.110773
E48P	-1.000781	0.186553	0.060734
N147W	-1.001576	0.14894	0.085182
L62G	-1.007352	0.565245	0.235814
I50W	-1.009146	0.141105	0.2757
A117F	-1.012696	0.057422	0.105409
A6Q	-1.013302	0.021422	0.164066
V10L	-1.017069	0.065366	0.098603
E90F	-1.020178	0.326162	0.088448
E90V	-1.025014	0.048415	0.097145
N147L	-1.03007	0.066258	0.040326
I155S	-1.030638	0.077012	0.092196
N37P	-1.033628	0.068442	0.107734
W47P	-1.033749	0.0262	0.185794
M16E	-1.036301	0.054818	0.085943
M42R	-1.03787	0.365418	0.163583
L24Y	-1.038314	0.179207	0.1506
L4P	-1.038381	0.036884	0.283942
D27G	-1.040925	0.35138	0.248847
L112P	-1.044682	0.230625	0.275971
S3K	-1.045268	0.108627	0.077027
I5P	-1.046025	0.358842	0.287805
S49Y	-1.04716	0.134688	0.075115
E17Q	-1.048212	0.132532	0.14326
G15L	-1.048462	0.127245	0.200515
T46A	-1.048981	0.095584	0.07669
E17Y	-1.050471	0.134901	0.128534
H45I	-1.051702	0.236149	0.072896
R12I	-1.052888	0.107478	0.087161
I61A	-1.054745	0.006187	0.112883
A117Y	-1.057554	0.290208	0.188167
A26M	-1.057944	0.074533	0.125753
A26E	-1.058215	0.049286	0.100624
W74P	-1.062555	0.248895	0.100708
I115W	-1.066929	0.052478	0.097564
M42C	-1.067651	0.532903	0.147044
H149I	-1.071546	0.343839	0.096803
E17M	-1.07542	0.131224	0.115957
M16K	-1.076783	0.162242	0.187899
S3H	-1.077552	0.307455	0.178074
V75P	-1.078207	0.081277	0.089257
L24W	-1.083541	0.249484	0.13401
A26S	-1.084632	0.017087	0.088594
S63L	-1.088874	0.046652	0.075408
P21K	-1.091445	0.222832	0.080746
G97L	-1.093024	0.060614	0.068985
A9Q	-1.093321	0.108762	0.112221
M16H	-1.093456	0.02597	0.089292
A9D	-1.097063	0.135337	0.11771
L28S	-1.097473	0.232449	0.084034
P126F	-1.097881	0.315264	0.101451
A9Y	-1.099768	0.260368	0.195175
G15P	-1.099833	0.075684	0.223499
D144P	-1.100697	0.073048	0.063783
I60A	-1.105791	0.167174	0.083529
H114D	-1.105991	0.038997	0.1142
I14P	-1.108921	0.083223	0.188405
L4G	-1.111805	0.157525	0.346519
Y151G	-1.118681	0.225557	0.032888
E17T	-1.119875	0.195155	0.098069
I94S	-1.120826	0.044134	0.070192
I41T	-1.122352	0.082769	0.042895
H149S	-1.125173	0.09968	0.095976
M92H	-1.125547	0.264346	0.090358
I14R	-1.127811	0.598088	0.331233
T46G	-1.12916	0.11117	0.062316
F125G	-1.134922	0.091172	0.056602
R98I	-1.13532	0.061303	0.092173
A81L	-1.139796	0.084305	0.072976
M42*	-1.140119	0.117687	0.34772
A26V	-1.142136	0.148576	0.066762
L28A	-1.144989	0.130235	0.067908
[truncated: 1,001 more rows]
