# Supplementary material for: Altered expression of a quality control protease in E. coli reshapes the in vivo mutational landscape of a model enzyme
Source: eLife. 2020 Jul 23;9:e53476. doi: 10.7554/eLife.53476 (PMC7377907; doi:10.7554/eLife.53476)
Supplement: Supplementary file 3. — Counts are recorded for all turbidostat timepoints over three repeats. [file elife-53476-supp3.csv]

#Mutant	Repeat1_t_00hrs	Repeat1_t_02hrs	Repeat1_t_04hrs	Repeat1_t_06hrs	Repeat1_t_08hrs	Repeat1_t_12hrs	Repeat1_t_16hrs	Repeat1_t_18hrs	Repeat2_t_00hrs	Repeat2_t_02hrs	Repeat2_t_04hrs	Repeat2_t_06hrs	Repeat2_t_08hrs	Repeat2_t_12hrs	Repeat2_t_16hrs	Repeat2_t_18hrs	Repeat3_t_00hrs	Repeat3_t_02hrs	Repeat3_t_04hrs	Repeat3_t_06hrs	Repeat3_t_08hrs	Repeat3_t_12hrs	Repeat3_t_16hrs	Repeat3_t_18hrs
D27N	na	na	na	na	na	na	na	na	na	na	na	na	na	na	na	na	410	na	na	na	na	na	na	na
F31V	4351	4561	5261	5743	5071	6724	5943	5729	6710	8003	7802	8181	9310	11195	9558	7826	6344	3953	6274	4248	3038	5770	2824	3495
F31Y	1457	1605	2832	2143	1865	2173	950	1016	1668	1963	1605	1988	2212	2228	1934	908	1484	1444	1646	1700	1106	1450	1186	869
F31Y	G121V	339	278	530	371	374	217	na	na	350	364	250	242	150	136	na	na	147	207	155	157	109	112	na	na
F31Y	L54I	553	507	1481	340	348	180	na	na	1612	1562	1256	955	1423	775	417	139	1868	1515	539	818	490	622	258	174
G121V	10722	15134	12743	13188	10141	7705	4000	4168	10951	12039	11077	10236	9026	10061	5168	3683	6188	6339	6573	4899	5257	6157	2449	1838
L28F	4606	7247	6035	9619	7623	12047	11456	14453	6301	8095	8476	7256	9985	16346	15127	11314	5087	5084	8026	5899	6736	10402	8464	11341
L28Y	1833	2125	2514	3669	2921	4283	2445	3275	1621	2373	2050	2169	3876	5256	3359	3138	1176	1041	1245	1413	1305	1600	1450	1009
L54F	1986	1162	2006	2480	2365	4303	2701	3444	683	965	484	948	1528	2787	2374	2208	837	1056	1534	1671	1499	2147	2499	2542
L54I	9897	13629	12103	12876	10593	11723	9165	10202	10481	11892	9719	8941	12142	15722	13439	9506	6295	6800	6151	5691	5074	7155	5215	5858
L54I	G121V	5535	5945	9386	4013	5276	1599	638	535	4056	4738	3666	3425	1611	1453	548	835	2614	2084	987	1130	750	790	309	148
M42F	G121V	4514	6346	7926	3944	6180	2242	657	803	4602	5868	4951	4295	1901	1875	874	954	2444	2019	988	1048	605	1342	283	364
T113V	2923	3750	4877	5325	5456	9580	8609	13620	2303	3256	2201	3156	6122	10862	11563	11081	3601	4773	5281	4893	4702	9222	8183	11001
W22H	1878	2940	2424	2526	1699	1616	1611	1307	5002	5276	4425	4034	4815	5391	3759	2829	3084	2802	3815	2684	2494	3624	1733	1865
_wt	13573	13083	17206	21787	17293	24460	17438	20374	12233	14197	11348	12287	16107	24601	20651	15908	7877	9702	12718	11608	9155	15925	9651	15233
