# Supplementary material for: Altered expression of a quality control protease in E. coli reshapes the in vivo mutational landscape of a model enzyme
Source: eLife. 2020 Jul 23;9:e53476. doi: 10.7554/eLife.53476 (PMC7377907; doi:10.7554/eLife.53476)
Supplement: Supplementary file 4. — Counts are recorded for a sample collected from the transformation rescue medium, a sample from overnight outgrowth in supplemented M9, and for all turbidostat timepoints over six experiments. In each experiment, 2 of 4 sublibraries were screened as described in Materials and methods, for a total of 3 repeats over the full library. [file elife-53476-supp4.csv]

#Mutant	Repeat1_library_transformation	Repeat1_outgrowth	Repeat1_t_00hrs	Repeat1_t_02hrs	Repeat1_t_04hrs	Repeat1_t_06hrs	Repeat1_t_08hrs	Repeat1_t_12hrs	Repeat1_t_16hrs	Repeat1_t_18hrs	Repeat2_library_transformation	Repeat2_outgrowth	Repeat2_t_00hrs	Repeat2_t_02hrs	Repeat2_t_04hrs	Repeat2_t_06hrs	Repeat2_t_08hrs	Repeat2_t_12hrs	Repeat2_t_16hrs	Repeat2_t_18hrs	Repeat3_library_transformation	Repeat3_outgrowth	Repeat3_t_00hrs	Repeat3_t_02hrs	Repeat3_t_04hrs	Repeat3_t_06hrs	Repeat3_t_08hrs	Repeat3_t_12hrs	Repeat3_t_16hrs	Repeat3_t_18hrs	Repeat4_library_transformation	Repeat4_outgrowth	Repeat4_t_00hrs	Repeat4_t_02hrs	Repeat4_t_04hrs	Repeat4_t_06hrs	Repeat4_t_08hrs	Repeat4_t_12hrs	Repeat4_t_16hrs	Repeat4_t_18hrs	Repeat5_library_transformation	Repeat5_outgrowth	Repeat5_t_00hrs	Repeat5_t_02hrs	Repeat5_t_04hrs	Repeat5_t_06hrs	Repeat5_t_08hrs	Repeat5_t_12hrs	Repeat5_t_16hrs
A107*	na	na	na	na	na	na	na	na	na	na	na	na	na	na	na	na	na	na	na	na	19	na	na	na	na	na	na	na	na	na	na	na	na	na	na	na	na	na	na	na	30	na	7	na	4	na	na	9	na
A107C	na	na	na	na	na	na	na	na	na	na	na	na	na	na	na	na	na	na	na	na	36	16	20	11	14	15	17	9	52	20	na	na	na	na	na	na	na	na	na	na	84	49	23	39	27	30	31	27	37
A107D	na	na	na	na	na	na	na	na	na	na	na	na	na	na	na	na	na	na	na	na	27	8	na	na	na	na	na	10	na	na	na	na	na	na	na	na	na	na	na	na	39	11	na	na	5	5	4	13	na
A107E	na	na	na	na	na	na	na	na	na	na	na	na	na	na	na	na	na	na	na	na	86	na	na	na	na	na	2	na	na	na	na	na	na	na	na	na	na	na	na	na	99	na	na	na	na	na	na	na	na
A107F	na	na	na	na	na	na	na	na	na	na	na	na	na	na	na	na	na	na	na	na	18	3	10	na	na	2	na	na	na	na	na	na	na	na	na	na	na	na	na	na	62	15	6	na	na	na	na	na	na
A107G	na	na	na	na	na	na	na	na	na	na	na	na	na	na	na	na	na	na	na	na	1308	1613	1183	668	801	880	804	761	1509	1065	na	na	na	na	na	na	na	na	na	na	3867	3519	1501	1650	1818	2816	1681	2028	1515
A107H	na	na	na	na	na	na	na	na	na	na	na	na	na	na	na	na	na	na	na	na	47	3	3	na	2	na	na	na	na	na	na	na	na	na	na	na	na	na	na	na	108	26	6	na	5	5	na	na	na
A107I	na	na	na	na	na	na	na	na	na	na	na	na	na	na	na	na	na	na	na	na	65	57	47	29	51	35	81	42	193	78	na	na	na	na	na	na	na	na	na	na	163	293	70	91	82	88	100	196	214
A107K	na	na	na	na	na	na	na	na	na	na	na	na	na	na	na	na	na	na	na	na	82	10	3	na	na	na	na	na	na	na	na	na	na	na	na	na	na	na	na	na	114	15	10	na	8	4	na	9	4
A107L	na	na	na	na	na	na	na	na	na	na	na	na	na	na	na	na	na	na	na	na	176	140	76	36	29	37	28	29	67	43	na	na	na	na	na	na	na	na	na	na	421	265	85	78	43	52	45	64	42
A107M	na	na	na	na	na	na	na	na	na	na	na	na	na	na	na	na	na	na	na	na	130	82	70	39	20	87	27	41	54	32	na	na	na	na	na	na	na	na	na	na	422	344	114	83	91	68	42	92	56
A107N	na	na	na	na	na	na	na	na	na	na	na	na	na	na	na	na	na	na	na	na	56	9	7	3	4	8	na	3	na	na	na	na	na	na	na	na	na	na	na	na	98	11	16	3	na	na	6	na	na
A107P	na	na	na	na	na	na	na	na	na	na	na	na	na	na	na	na	na	na	na	na	167	8	12	2	4	na	na	na	na	na	na	na	na	na	na	na	na	na	na	na	247	269	26	7	11	4	4	na	na
A107Q	na	na	na	na	na	na	na	na	na	na	na	na	na	na	na	na	na	na	na	na	24	2	na	na	na	na	4	na	na	na	na	na	na	na	na	na	na	na	na	na	30	21	4	3	na	na	na	na	na
A107R	na	na	na	na	na	na	na	na	na	na	na	na	na	na	na	na	na	na	na	na	259	14	4	3	3	2	na	na	na	na	na	na	na	na	na	na	na	na	na	na	229	35	21	17	na	7	5	9	7
A107S	na	na	na	na	na	na	na	na	na	na	na	na	na	na	na	na	na	na	na	na	127	154	99	76	77	101	91	71	202	155	na	na	na	na	na	na	na	na	na	na	401	327	145	143	169	197	179	256	162
A107T	na	na	na	na	na	na	na	na	na	na	na	na	na	na	na	na	na	na	na	na	225	330	251	173	204	222	274	212	601	400	na	na	na	na	na	na	na	na	na	na	805	996	319	424	454	472	498	705	643
A107V	na	na	na	na	na	na	na	na	na	na	na	na	na	na	na	na	na	na	na	na	321	486	263	147	157	196	221	293	578	374	na	na	na	na	na	na	na	na	na	na	832	1056	226	325	434	458	460	603	707
A107W	na	na	na	na	na	na	na	na	na	na	na	na	na	na	na	na	na	na	na	na	39	6	na	2	na	na	na	3	na	na	na	na	na	na	na	na	na	na	na	na	129	24	10	5	na	na	na	na	na
A107Y	na	na	na	na	na	na	na	na	na	na	na	na	na	na	na	na	na	na	na	na	18	na	na	na	2	na	na	na	na	na	na	na	na	na	na	na	na	na	na	na	28	na	4	6	na	na	na	na	na
A117*	na	na	na	na	na	na	na	na	na	na	na	na	na	na	na	na	na	na	na	na	121	14	4	2	3	na	na	na	na	na	na	na	na	na	na	na	na	na	na	na	148	15	15	31	14	6	na	8	na
A117C	na	na	na	na	na	na	na	na	na	na	na	na	na	na	na	na	na	na	na	na	49	85	64	41	36	68	43	30	93	59	na	na	na	na	na	na	na	na	na	na	202	153	109	115	119	133	126	135	131
A117D	na	na	na	na	na	na	na	na	na	na	na	na	na	na	na	na	na	na	na	na	87	78	91	48	39	67	49	182	118	80	na	na	na	na	na	na	na	na	na	na	280	319	121	100	160	118	155	217	147
A117E	na	na	na	na	na	na	na	na	na	na	na	na	na	na	na	na	na	na	na	na	376	465	426	217	246	290	298	245	715	549	na	na	na	na	na	na	na	na	na	na	1364	899	575	615	754	758	738	908	719
A117F	na	na	na	na	na	na	na	na	na	na	na	na	na	na	na	na	na	na	na	na	216	146	135	66	127	60	24	18	26	27	na	na	na	na	na	na	na	na	na	na	658	571	137	111	143	114	56	45	52
A117G	na	na	na	na	na	na	na	na	na	na	na	na	na	na	na	na	na	na	na	na	1617	1573	1799	907	1027	1139	1020	945	2400	1625	na	na	na	na	na	na	na	na	na	na	6509	6823	2608	2459	3142	3139	2740	4077	2917
A117H	na	na	na	na	na	na	na	na	na	na	na	na	na	na	na	na	na	na	na	na	187	180	148	100	88	69	97	161	157	116	na	na	na	na	na	na	na	na	na	na	628	469	205	216	255	222	240	239	204
A117I	na	na	na	na	na	na	na	na	na	na	na	na	na	na	na	na	na	na	na	na	146	177	160	92	101	128	161	107	294	178	na	na	na	na	na	na	na	na	na	na	443	439	190	236	328	232	271	460	405
A117K	na	na	na	na	na	na	na	na	na	na	na	na	na	na	na	na	na	na	na	na	785	706	661	391	459	480	300	243	578	433	na	na	na	na	na	na	na	na	na	na	2588	2638	911	960	1140	977	829	1040	629
A117L	na	na	na	na	na	na	na	na	na	na	na	na	na	na	na	na	na	na	na	na	924	639	567	435	299	317	188	177	407	335	na	na	na	na	na	na	na	na	na	na	2931	2540	962	822	891	761	570	668	376
A117M	na	na	na	na	na	na	na	na	na	na	na	na	na	na	na	na	na	na	na	na	222	356	179	126	134	117	121	137	278	184	na	na	na	na	na	na	na	na	na	na	712	964	307	310	404	395	351	477	272
A117N	na	na	na	na	na	na	na	na	na	na	na	na	na	na	na	na	na	na	na	na	270	287	400	160	186	193	167	115	269	247	na	na	na	na	na	na	na	na	na	na	1057	955	354	421	471	393	398	481	354
A117P	na	na	na	na	na	na	na	na	na	na	na	na	na	na	na	na	na	na	na	na	1453	1289	1143	491	383	463	270	268	616	392	na	na	na	na	na	na	na	na	na	na	3925	3277	1365	1099	1009	864	589	727	376
A117Q	na	na	na	na	na	na	na	na	na	na	na	na	na	na	na	na	na	na	na	na	189	111	178	73	135	135	140	103	275	240	na	na	na	na	na	na	na	na	na	na	524	535	259	293	280	985	309	382	409
A117R	na	na	na	na	na	na	na	na	na	na	na	na	na	na	na	na	na	na	na	na	621	553	607	414	515	444	419	410	1031	749	na	na	na	na	na	na	na	na	na	na	2204	2194	969	1129	1188	1259	1082	1407	1210
A117S	na	na	na	na	na	na	na	na	na	na	na	na	na	na	na	na	na	na	na	na	422	382	366	219	199	314	242	211	638	442	na	na	na	na	na	na	na	na	na	na	1062	1377	547	512	635	692	647	858	548
A117T	na	na	na	na	na	na	na	na	na	na	na	na	na	na	na	na	na	na	na	na	372	576	503	227	223	253	192	325	344	286	na	na	na	na	na	na	na	na	na	na	1390	1556	459	543	652	561	498	662	542
A117V	na	na	na	na	na	na	na	na	na	na	na	na	na	na	na	na	na	na	na	na	698	687	679	310	585	598	468	436	1045	646	na	na	na	na	na	na	na	na	na	na	2086	2403	991	1015	1245	1389	1170	1587	1320
A117W	na	na	na	na	na	na	na	na	na	na	na	na	na	na	na	na	na	na	na	na	249	142	259	75	51	79	49	44	57	62	na	na	na	na	na	na	na	na	na	na	914	542	258	146	230	265	168	97	74
A117Y	na	na	na	na	na	na	na	na	na	na	na	na	na	na	na	na	na	na	na	na	77	173	62	23	18	37	13	5	7	17	na	na	na	na	na	na	na	na	na	na	345	209	62	79	59	46	31	31	15
A143*	na	na	na	na	na	na	na	na	na	na	na	na	na	na	na	na	na	na	na	na	na	na	na	na	na	na	na	na	na	na	123	25	2	6	3	3	8	na	3	4	236	56	17	8	8	10	7	8	9
A143C	na	na	na	na	na	na	na	na	na	na	na	na	na	na	na	na	na	na	na	na	na	na	na	na	na	na	na	na	na	na	49	74	7	22	22	17	36	31	33	24	162	125	54	74	84	77	66	93	55
A143D	na	na	na	na	na	na	na	na	na	na	na	na	na	na	na	na	na	na	na	na	na	na	na	na	na	na	na	na	na	na	2	173	46	62	55	46	65	90	88	89	402	429	166	164	213	177	156	210	187
A143E	na	na	na	na	na	na	na	na	na	na	na	na	na	na	na	na	na	na	na	na	na	na	na	na	na	na	na	na	na	na	411	315	155	142	132	107	172	133	184	181	905	873	337	347	462	422	403	604	391
A143F	na	na	na	na	na	na	na	na	na	na	na	na	na	na	na	na	na	na	na	na	na	na	na	na	na	na	na	na	na	na	465	480	138	167	140	142	190	241	219	220	1090	1230	377	521	531	582	507	705	581
A143G	na	na	na	na	na	na	na	na	na	na	na	na	na	na	na	na	na	na	na	na	na	na	na	na	na	na	na	na	na	na	1347	1512	408	508	400	320	529	544	559	525	6	3208	1175	1236	1643	1384	1340	1708	1299
A143H	na	na	na	na	na	na	na	na	na	na	na	na	na	na	na	na	na	na	na	na	na	na	na	na	na	na	na	na	na	na	294	577	114	109	109	106	153	160	190	158	689	841	305	301	361	387	331	414	370
A143I	na	na	na	na	na	na	na	na	na	na	na	na	na	na	na	na	na	na	na	na	na	na	na	na	na	na	na	na	na	na	254	329	73	102	81	91	134	110	115	173	583	564	232	265	330	329	289	395	254
A143K	na	na	na	na	na	na	na	na	na	na	na	na	na	na	na	na	na	na	na	na	na	na	na	na	na	na	na	na	na	na	845	1154	276	338	350	274	453	379	512	551	2100	2350	839	959	1159	1265	998	1422	1255
A143L	na	na	na	na	na	na	na	na	na	na	na	na	na	na	na	na	na	na	na	na	na	na	na	na	na	na	na	na	na	na	1494	1663	535	636	578	441	770	809	859	823	3564	3994	1341	1675	1999	1872	1749	2357	1752
A143M	na	na	na	na	na	na	na	na	na	na	na	na	na	na	na	na	na	na	na	na	na	na	na	na	na	na	na	na	na	na	437	420	131	160	142	138	194	204	252	235	902	942	392	507	487	601	498	600	529
A143N	na	na	na	na	na	na	na	na	na	na	na	na	na	na	na	na	na	na	na	na	na	na	na	na	na	na	na	na	na	na	661	874	209	245	232	170	266	309	329	353	1517	1468	619	625	803	754	681	875	651
A143P	na	na	na	na	na	na	na	na	na	na	na	na	na	na	na	na	na	na	na	na	na	na	na	na	na	na	na	na	na	na	2430	2326	612	713	569	470	713	663	696	622	8	9	1830	1739	1826	2332	1751	1955	1547
A143Q	na	na	na	na	na	na	na	na	na	na	na	na	na	na	na	na	na	na	na	na	na	na	na	na	na	na	na	na	na	na	239	298	91	104	83	72	100	144	93	99	511	11	260	252	317	358	259	356	293
A143R	na	na	na	na	na	na	na	na	na	na	na	na	na	na	na	na	na	na	na	na	na	na	na	na	na	na	na	na	na	na	758	964	258	301	270	251	385	451	396	391	1770	3	717	862	1001	953	861	1305	908
A143S	na	na	na	na	na	na	na	na	na	na	na	na	na	na	na	na	na	na	na	na	na	na	na	na	na	na	na	na	na	na	3	748	199	213	185	135	272	277	326	213	4	7	489	542	580	669	565	773	663
A143T	na	na	na	na	na	na	na	na	na	na	na	na	na	na	na	na	na	na	na	na	na	na	na	na	na	na	na	na	na	na	977	1050	337	399	288	277	415	388	423	353	2212	6	829	980	1053	1031	1003	1198	857
A143V	na	na	na	na	na	na	na	na	na	na	na	na	na	na	na	na	na	na	na	na	na	na	na	na	na	na	na	na	na	na	829	965	259	344	322	246	367	440	448	438	3	9	877	873	1084	1075	967	1288	968
A143W	na	na	na	na	na	na	na	na	na	na	na	na	na	na	na	na	na	na	na	na	na	na	na	na	na	na	na	na	na	na	335	383	97	112	119	77	140	115	148	106	821	869	341	343	379	361	377	446	343
A143Y	na	na	na	na	na	na	na	na	na	na	na	na	na	na	na	na	na	na	na	na	na	na	na	na	na	na	na	na	na	na	166	185	54	60	59	46	64	73	65	73	377	407	102	146	174	176	150	229	168
A145*	na	na	na	na	na	na	na	na	na	na	na	na	na	na	na	na	na	na	na	na	na	na	na	na	na	na	na	na	na	na	172	37	12	10	3	7	4	5	4	2	260	78	26	20	13	11	16	na	6
A145C	na	na	na	na	na	na	na	na	na	na	na	na	na	na	na	na	na	na	na	na	na	na	na	na	na	na	na	na	na	na	169	169	42	85	68	54	90	73	74	70	4	345	169	163	195	212	194	231	195
A145D	na	na	na	na	na	na	na	na	na	na	na	na	na	na	na	na	na	na	na	na	na	na	na	na	na	na	na	na	na	na	247	320	85	94	84	108	134	158	152	136	601	733	217	266	374	323	315	443	323
A145E	na	na	na	na	na	na	na	na	na	na	na	na	na	na	na	na	na	na	na	na	na	na	na	na	na	na	na	na	na	na	580	722	153	255	169	167	250	302	320	280	1455	1529	462	568	663	634	695	797	589
A145F	na	na	na	na	na	na	na	na	na	na	na	na	na	na	na	na	na	na	na	na	na	na	na	na	na	na	na	na	na	na	330	288	146	139	97	104	161	198	201	180	863	1054	320	395	424	563	438	546	906
A145G	na	na	na	na	na	na	na	na	na	na	na	na	na	na	na	na	na	na	na	na	na	na	na	na	na	na	na	na	na	na	2569	2787	893	1132	911	838	1229	1543	1542	1562	6451	7413	2596	2997	3505	3533	3393	4838	3887
A145H	na	na	na	na	na	na	na	na	na	na	na	na	na	na	na	na	na	na	na	na	na	na	na	na	na	na	na	na	na	na	359	428	137	129	148	143	242	230	233	208	933	1068	352	453	484	637	541	732	571
A145I	na	na	na	na	na	na	na	na	na	na	na	na	na	na	na	na	na	na	na	na	na	na	na	na	na	na	na	na	na	na	264	306	84	95	74	46	140	123	117	146	3	551	219	236	326	270	263	288	291
A145K	na	na	na	na	na	na	na	na	na	na	na	na	na	na	na	na	na	na	na	na	na	na	na	na	na	na	na	na	na	na	884	885	223	334	284	224	410	408	416	399	2000	2119	778	911	1023	1118	915	1308	1032
A145L	na	na	na	na	na	na	na	na	na	na	na	na	na	na	na	na	na	na	na	na	na	na	na	na	na	na	na	na	na	na	1823	2335	649	705	625	550	855	922	915	961	10	4711	1771	1973	2253	2376	2163	2742	2386
A145M	na	na	na	na	na	na	na	na	na	na	na	na	na	na	na	na	na	na	na	na	na	na	na	na	na	na	na	na	na	na	528	504	190	216	201	163	294	267	262	286	5	24	449	514	628	713	619	786	601
A145N	na	na	na	na	na	na	na	na	na	na	na	na	na	na	na	na	na	na	na	na	na	na	na	na	na	na	na	na	na	na	450	550	153	182	174	147	237	240	279	269	1139	1225	385	547	639	633	591	792	668
A145P	na	na	na	na	na	na	na	na	na	na	na	na	na	na	na	na	na	na	na	na	na	na	na	na	na	na	na	na	na	na	1373	1448	456	525	419	371	529	472	591	612	11	3256	1173	1328	1444	1402	1285	1793	1110
A145Q	na	na	na	na	na	na	na	na	na	na	na	na	na	na	na	na	na	na	na	na	na	na	na	na	na	na	na	na	na	na	424	455	130	201	146	122	175	188	226	188	992	1069	368	409	532	533	453	603	511
A145R	na	na	na	na	na	na	na	na	na	na	na	na	na	na	na	na	na	na	na	na	na	na	na	na	na	na	na	na	na	na	1531	1617	554	576	570	465	704	765	880	798	5	17	1481	1579	1946	1988	1810	2354	1646
A145S	na	na	na	na	na	na	na	na	na	na	na	na	na	na	na	na	na	na	na	na	na	na	na	na	na	na	na	na	na	na	897	1172	329	334	268	265	473	524	440	449	2212	2260	747	883	1013	1150	971	1374	974
A145T	na	na	na	na	na	na	na	na	na	na	na	na	na	na	na	na	na	na	na	na	na	na	na	na	na	na	na	na	na	na	547	689	190	215	176	148	302	214	260	345	1377	1501	528	611	600	649	496	746	626
A145V	na	na	na	na	na	na	na	na	na	na	na	na	na	na	na	na	na	na	na	na	na	na	na	na	na	na	na	na	na	na	8	1006	227	300	294	170	367	405	379	319	7	3	698	910	1010	920	839	1316	971
A145W	na	na	na	na	na	na	na	na	na	na	na	na	na	na	na	na	na	na	na	na	na	na	na	na	na	na	na	na	na	na	708	827	239	257	284	212	333	443	452	453	3	1923	758	779	927	986	867	1204	829
A145Y	na	na	na	na	na	na	na	na	na	na	na	na	na	na	na	na	na	na	na	na	na	na	na	na	na	na	na	na	na	na	278	291	71	81	91	76	128	128	126	106	627	647	258	277	336	296	325	343	333
A19*	171	78	13	19	2	4	na	9	5	30	135	26	24	1	10	na	3	4	na	na	176	35	7	2	5	3	na	na	na	4	na	na	na	na	na	na	na	na	na	na	na	na	na	na	na	na	na	na	na
A19C	385	580	170	126	158	123	121	319	149	281	148	321	121	83	105	105	100	109	194	178	318	369	316	154	134	169	185	174	556	358	na	na	na	na	na	na	na	na	na	na	na	na	na	na	na	na	na	na	na
A19D	416	857	198	95	94	138	116	225	96	194	248	653	54	131	96	319	75	230	172	177	1	538	272	115	136	163	210	161	567	318	na	na	na	na	na	na	na	na	na	na	na	na	na	na	na	na	na	na	na
A19E	671	1161	377	185	160	136	204	182	85	156	251	661	162	214	169	175	108	130	155	119	525	752	536	245	314	257	147	207	296	312	na	na	na	na	na	na	na	na	na	na	na	na	na	na	na	na	na	na	na
A19F	561	1192	305	201	270	239	270	782	366	658	174	622	183	279	200	408	344	270	403	590	487	777	482	292	358	427	398	471	1230	824	na	na	na	na	na	na	na	na	na	na	na	na	na	na	na	na	na	na	na
A19G	3639	4885	1732	1114	1394	1469	1250	2434	1336	2402	1623	3379	1193	1053	951	3902	1553	1832	1873	3366	3010	4167	2622	1330	1457	1939	1974	1993	5016	3292	na	na	na	na	na	na	na	na	na	na	na	na	na	na	na	na	na	na	na
A19H	454	648	204	170	144	128	136	479	139	241	209	422	121	149	135	302	230	151	224	191	479	573	362	162	158	253	235	220	653	534	na	na	na	na	na	na	na	na	na	na	na	na	na	na	na	na	na	na	na
A19I	517	657	283	170	232	200	136	401	220	324	174	499	150	199	176	168	184	209	242	327	417	508	444	201	199	246	277	237	671	469	na	na	na	na	na	na	na	na	na	na	na	na	na	na	na	na	na	na	na
A19K	1052	1467	355	232	224	298	179	292	143	234	482	986	210	266	257	350	244	253	249	202	795	896	558	290	287	353	271	225	576	463	na	na	na	na	na	na	na	na	na	na	na	na	na	na	na	na	na	na	na
A19L	1483	3123	721	416	548	305	348	528	223	373	885	1626	396	437	387	415	553	312	373	515	1243	1614	1117	575	594	687	562	456	895	940	na	na	na	na	na	na	na	na	na	na	na	na	na	na	na	na	na	na	na
A19M	576	785	210	144	173	139	145	258	91	178	203	510	136	160	145	300	200	119	171	154	445	742	380	252	250	246	203	140	434	303	na	na	na	na	na	na	na	na	na	na	na	na	na	na	na	na	na	na	na
A19N	1169	1476	533	590	500	443	438	789	486	830	482	1110	295	228	282	454	520	484	624	874	1	8351	901	438	546	582	734	627	1730	1194	na	na	na	na	na	na	na	na	na	na	na	na	na	na	na	na	na	na	na
A19P	56	10	10	5	2	29	2	27	3	na	111	2	8	8	4	4	na	na	na	na	1	3	5	5	na	2	2	5	na	na	na	na	na	na	na	na	na	na	na	na	na	na	na	na	na	na	na	na	na
A19Q	472	602	255	119	126	176	105	314	127	110	229	433	104	88	86	133	140	85	179	162	362	405	396	148	219	182	154	290	340	200	na	na	na	na	na	na	na	na	na	na	na	na	na	na	na	na	na	na	na
A19R	1403	1551	483	278	283	362	184	374	121	178	454	974	384	266	236	397	354	180	256	216	1	1249	770	347	404	439	383	211	520	350	na	na	na	na	na	na	na	na	na	na	na	na	na	na	na	na	na	na	na
A19S	710	878	260	155	140	316	166	320	174	227	294	1	151	245	186	191	225	167	238	180	1	1	438	215	227	320	288	266	605	410	na	na	na	na	na	na	na	na	na	na	na	na	na	na	na	na	na	na	na
A19T	363	374	230	76	138	270	103	125	110	144	198	5	56	76	165	596	183	93	91	154	6	7	384	127	119	190	97	119	243	316	na	na	na	na	na	na	na	na	na	na	na	na	na	na	na	na	na	na	na
A19V	1297	2086	436	274	106	128	122	189	65	142	495	5	264	164	266	436	190	326	226	104	1	2	643	330	318	330	219	183	432	302	na	na	na	na	na	na	na	na	na	na	na	na	na	na	na	na	na	na	na
A19W	939	1415	469	274	408	480	331	550	339	544	317	956	244	227	316	441	449	414	453	486	674	1230	748	382	458	547	457	455	1108	740	na	na	na	na	na	na	na	na	na	na	na	na	na	na	na	na	na	na	na
A19Y	451	558	210	167	151	267	157	486	188	474	211	346	186	108	147	240	206	152	271	638	363	434	403	188	248	272	256	370	771	582	na	na	na	na	na	na	na	na	na	na	na	na	na	na	na	na	na	na	na
A26*	305	37	32	17	3	11	na	12	na	na	310	59	14	99	3	5	3	4	2	8	1	67	32	6	8	11	9	3	7	3	na	na	na	na	na	na	na	na	na	na	na	na	na	na	na	na	na	na	na
A26C	258	359	110	63	65	72	18	29	46	8	85	199	81	62	49	82	32	28	18	23	195	164	122	94	48	92	43	32	63	91	na	na	na	na	na	na	na	na	na	na	na	na	na	na	na	na	na	na	na
A26D	200	428	36	12	na	na	6	16	na	na	105	177	2	28	7	na	2	na	na	na	2	2	77	39	32	43	na	na	na	4	na	na	na	na	na	na	na	na	na	na	na	na	na	na	na	na	na	na	na
A26E	1387	1902	590	272	245	186	231	278	54	197	606	1378	261	283	223	199	213	252	250	233	1296	1572	980	426	579	539	283	194	524	341	na	na	na	na	na	na	na	na	na	na	na	na	na	na	na	na	na	na	na
A26F	496	884	288	148	147	215	171	323	156	281	194	412	167	103	128	2745	138	137	195	267	415	1009	380	204	188	204	214	218	477	320	na	na	na	na	na	na	na	na	na	na	na	na	na	na	na	na	na	na	na
A26G	3902	5322	1574	817	608	691	400	809	231	381	1803	2	1191	2077	760	923	724	565	617	471	7	1	2160	1155	1342	1276	791	1028	1119	925	na	na	na	na	na	na	na	na	na	na	na	na	na	na	na	na	na	na	na
A26H	190	233	71	59	40	35	63	128	33	79	90	246	39	64	62	74	84	56	98	39	141	312	107	61	87	80	54	40	201	130	na	na	na	na	na	na	na	na	na	na	na	na	na	na	na	na	na	na	na
A26I	396	514	142	99	98	162	92	174	76	180	151	272	138	58	111	159	229	99	130	134	247	1606	427	123	118	117	156	169	395	241	na	na	na	na	na	na	na	na	na	na	na	na	na	na	na	na	na	na	na
A26K	869	1067	375	138	168	69	63	106	19	36	428	757	231	178	91	307	83	65	101	139	792	1054	695	275	152	186	120	168	141	109	na	na	na	na	na	na	na	na	na	na	na	na	na	na	na	na	na	na	na
A26L	2747	4153	1368	649	686	558	500	749	316	561	1151	2376	648	523	761	1002	589	939	601	693	2317	3023	2123	960	893	997	711	764	1421	1050	na	na	na	na	na	na	na	na	na	na	na	na	na	na	na	na	na	na	na
A26M	884	1237	354	122	154	95	70	257	58	68	375	848	196	293	196	223	123	145	169	138	770	750	553	255	225	329	137	276	194	200	na	na	na	na	na	na	na	na	na	na	na	na	na	na	na	na	na	na	na
A26N	231	278	74	39	49	21	29	79	4	12	115	172	58	30	40	27	23	49	17	32	172	267	180	50	60	62	28	27	62	71	na	na	na	na	na	na	na	na	na	na	na	na	na	na	na	na	na	na	na
A26P	302	411	107	61	107	84	67	108	44	83	128	3	58	83	68	169	141	66	87	64	1	183	162	93	67	122	87	87	171	161	na	na	na	na	na	na	na	na	na	na	na	na	na	na	na	na	na	na	na
A26Q	476	871	292	187	105	93	64	78	127	113	288	574	115	231	100	75	342	73	126	66	435	501	249	155	189	211	148	88	343	205	na	na	na	na	na	na	na	na	na	na	na	na	na	na	na	na	na	na	na
A26R	2126	3265	822	352	464	214	346	312	112	611	1175	1716	577	439	793	427	470	263	314	330	1	2190	1384	580	741	623	310	229	543	448	na	na	na	na	na	na	na	na	na	na	na	na	na	na	na	na	na	na	na
A26S	839	864	288	260	70	53	67	289	91	129	395	1	135	242	135	208	80	693	107	6	1	1	415	220	170	200	147	109	248	174	na	na	na	na	na	na	na	na	na	na	na	na	na	na	na	na	na	na	na
A26T	489	857	198	110	107	150	56	60	31	93	187	5	96	92	242	133	48	78	81	67	3	11	253	147	217	134	105	103	211	130	na	na	na	na	na	na	na	na	na	na	na	na	na	na	na	na	na	na	na
A26V	1624	2548	911	354	320	198	253	528	118	286	744	9	417	456	277	4868	207	293	337	221	10	2	1166	620	589	625	467	277	601	440	na	na	na	na	na	na	na	na	na	na	na	na	na	na	na	na	na	na	na
A26W	1243	1492	487	169	347	87	77	261	66	118	482	957	230	202	202	302	136	390	155	243	975	1	561	273	259	316	167	136	304	227	na	na	na	na	na	na	na	na	na	na	na	na	na	na	na	na	na	na	na
A26Y	148	296	54	53	60	84	66	97	31	112	86	150	67	16	59	98	39	39	87	36	161	190	115	68	49	70	84	139	136	142	na	na	na	na	na	na	na	na	na	na	na	na	na	na	na	na	na	na	na
A29*	122	42	4	na	na	12	2	na	na	21	151	27	18	15	6	6	na	na	3	11	172	5	8	5	2	3	na	na	na	5	na	na	na	na	na	na	na	na	na	na	na	na	na	na	na	na	na	na	na
A29C	518	620	206	69	126	44	47	78	21	88	175	513	135	451	79	59	214	47	67	50	2	460	245	137	236	153	85	94	155	122	na	na	na	na	na	na	na	na	na	na	na	na	na	na	na	na	na	na	na
A29D	402	278	100	na	58	6	1	na	na	na	240	237	290	201	2	787	88	3	na	3	333	2	69	28	na	9	na	na	na	na	na	na	na	na	na	na	na	na	na	na	na	na	na	na	na	na	na	na	na
A29E	631	886	265	236	145	331	198	418	148	387	411	625	162	340	199	274	186	155	221	350	601	491	454	227	327	270	282	276	613	477	na	na	na	na	na	na	na	na	na	na	na	na	na	na	na	na	na	na	na
A29F	770	1285	366	236	189	235	164	398	118	253	407	829	653	162	166	360	191	157	231	186	10	854	526	300	331	343	277	260	481	419	na	na	na	na	na	na	na	na	na	na	na	na	na	na	na	na	na	na	na
A29G	2137	2894	665	278	250	199	171	468	115	216	1092	2	548	365	335	904	265	583	335	194	1842	2	909	527	405	554	365	338	630	553	na	na	na	na	na	na	na	na	na	na	na	na	na	na	na	na	na	na	na
A29H	734	931	333	130	221	101	87	205	57	79	283	742	171	224	184	203	268	188	173	77	597	740	421	231	261	332	188	146	331	216	na	na	na	na	na	na	na	na	na	na	na	na	na	na	na	na	na	na	na
A29I	556	501	218	101	239	56	24	59	27	28	204	539	71	87	90	35	168	37	55	24	420	551	220	126	106	115	43	81	85	59	na	na	na	na	na	na	na	na	na	na	na	na	na	na	na	na	na	na	na
A29K	844	1488	318	145	212	243	165	404	147	243	387	722	243	222	196	271	221	181	259	226	726	1098	544	272	288	402	318	314	596	424	na	na	na	na	na	na	na	na	na	na	na	na	na	na	na	na	na	na	na
A29L	2504	3336	1037	738	739	892	802	1324	643	1215	1759	2318	758	741	748	1363	777	733	1152	1607	1	3	1784	990	1100	1393	1383	936	2572	1802	na	na	na	na	na	na	na	na	na	na	na	na	na	na	na	na	na	na	na
A29M	559	816	240	104	131	36	48	56	30	76	213	545	149	103	100	94	89	93	111	118	504	1	330	187	163	203	110	76	171	153	na	na	na	na	na	na	na	na	na	na	na	na	na	na	na	na	na	na	na
A29N	691	797	202	41	80	10	42	18	17	15	299	1	194	181	79	136	25	52	61	50	490	747	294	116	116	109	37	23	46	42	na	na	na	na	na	na	na	na	na	na	na	na	na	na	na	na	na	na	na
A29P	1572	876	114	22	16	2	6	2	2	4	696	6	125	95	13	65	5	14	7	15	1306	767	162	56	53	20	39	35	14	10	na	na	na	na	na	na	na	na	na	na	na	na	na	na	na	na	na	na	na
A29Q	658	911	305	227	310	311	248	278	265	493	232	698	208	107	169	276	299	202	364	392	569	727	664	256	295	354	352	328	858	582	na	na	na	na	na	na	na	na	na	na	na	na	na	na	na	na	na	na	na
A29R	1897	2930	867	509	441	400	367	870	272	356	915	1814	612	991	389	1151	717	586	561	358	1572	2516	1296	616	661	688	760	648	1108	836	na	na	na	na	na	na	na	na	na	na	na	na	na	na	na	na	na	na	na
A29S	1686	2352	743	416	368	453	390	736	260	606	1021	3	401	1148	363	430	406	1135	462	454	1	1	1152	555	586	722	532	488	1105	983	na	na	na	na	na	na	na	na	na	na	na	na	na	na	na	na	na	na	na
A29T	1054	1247	288	161	155	153	118	251	108	136	458	15	184	163	130	164	163	246	189	175	11	10	388	222	197	292	329	172	465	308	na	na	na	na	na	na	na	na	na	na	na	na	na	na	na	na	na	na	na
A29V	1340	1453	338	231	204	173	125	206	176	132	878	5	353	244	157	201	180	170	213	117	1	2	622	374	249	351	243	210	516	277	na	na	na	na	na	na	na	na	na	na	na	na	na	na	na	na	na	na	na
A29W	645	885	303	232	278	172	118	333	137	236	257	622	261	301	121	225	182	173	266	469	3	748	497	230	367	309	229	276	555	390	na	na	na	na	na	na	na	na	na	na	na	na	na	na	na	na	na	na	na
A29Y	567	605	238	114	83	70	46	112	9	30	281	453	109	102	138	151	50	301	72	65	432	741	319	154	189	150	91	47	132	101	na	na	na	na	na	na	na	na	na	na	na	na	na	na	na	na	na	na	na
A6*	135	34	13	na	4	na	na	8	9	23	191	30	9	4	6	2	12	4	4	4	193	27	10	3	na	3	2	4	13	na	na	na	na	na	na	na	na	na	na	na	na	na	na	na	na	na	na	na	na
A6C	192	135	60	27	85	39	59	87	45	80	94	111	42	65	43	118	81	22	44	145	150	111	95	51	45	54	74	65	174	127	na	na	na	na	na	na	na	na	na	na	na	na	na	na	na	na	na	na	na
A6D	105	35	14	4	na	na	na	8	na	na	60	37	8	8	10	na	na	2	na	na	136	30	3	4	na	3	na	na	na	na	na	na	na	na	na	na	na	na	na	na	na	na	na	na	na	na	na	na	na
A6E	42	2	na	na	na	na	2	na	na	na	33	na	na	2	4	na	na	na	na	na	1	2	na	na	na	na	na	na	na	na	na	na	na	na	na	na	na	na	na	na	na	na	na	na	na	na	na	na	na
A6F	1258	2134	551	381	545	438	485	1551	546	1357	525	1491	385	316	494	1418	584	619	866	1287	1074	1969	987	565	630	708	877	894	2416	1558	na	na	na	na	na	na	na	na	na	na	na	na	na	na	na	na	na	na	na
A6G	443	957	247	148	111	125	81	176	104	147	218	587	93	108	94	282	223	176	193	198	389	1	292	169	228	238	228	177	460	337	na	na	na	na	na	na	na	na	na	na	na	na	na	na	na	na	na	na	na
A6H	234	89	37	13	8	5	3	4	4	na	149	69	15	29	13	na	4	13	na	3	258	119	24	19	2	10	5	6	5	9	na	na	na	na	na	na	na	na	na	na	na	na	na	na	na	na	na	na	na
A6I	327	500	155	128	111	200	162	411	262	486	142	413	87	69	138	267	295	278	288	644	296	419	261	144	222	185	192	239	890	465	na	na	na	na	na	na	na	na	na	na	na	na	na	na	na	na	na	na	na
A6K	209	52	21	4	8	24	na	19	na	na	181	57	11	7	11	na	na	12	na	5	235	43	13	4	7	5	na	12	na	5	na	na	na	na	na	na	na	na	na	na	na	na	na	na	na	na	na	na	na
A6L	2935	2972	1159	390	390	436	374	470	417	486	1421	2532	665	550	559	805	482	536	531	468	2	2876	1463	835	770	921	520	537	1259	909	na	na	na	na	na	na	na	na	na	na	na	na	na	na	na	na	na	na	na
A6M	578	1100	293	150	108	147	168	486	166	437	357	640	201	182	245	813	268	198	349	275	na	na	na	na	na	na	na	na	na	na	na	na	na	na	na	na	na	na	na	na	na	na	na	na	na	na	na	na	na
A6N	690	1041	278	174	111	284	229	459	241	405	197	688	129	113	195	325	255	223	429	507	510	634	393	232	227	253	292	333	866	644	na	na	na	na	na	na	na	na	na	na	na	na	na	na	na	na	na	na	na
A6P	275	64	15	4	17	2	na	14	4	3	453	32	25	10	10	7	5	3	na	13	358	120	16	5	9	4	3	na	8	5	na	na	na	na	na	na	na	na	na	na	na	na	na	na	na	na	na	na	na
A6Q	443	407	122	39	72	5	45	55	13	23	319	384	102	92	82	81	23	38	49	342	380	418	183	80	50	106	42	35	57	51	na	na	na	na	na	na	na	na	na	na	na	na	na	na	na	na	na	na	na
A6R	297	47	14	5	16	9	6	9	7	na	291	38	36	19	4	8	4	na	2	na	348	33	11	8	2	3	3	2	10	6	na	na	na	na	na	na	na	na	na	na	na	na	na	na	na	na	na	na	na
A6S	750	963	308	136	282	285	295	543	394	614	693	1	249	267	243	390	303	331	485	678	651	3	426	266	214	338	357	407	1173	764	na	na	na	na	na	na	na	na	na	na	na	na	na	na	na	na	na	na	na
A6T	395	938	165	128	96	293	250	520	263	849	158	2	39	110	121	194	275	213	390	613	2	8	323	160	169	220	413	285	1019	655	na	na	na	na	na	na	na	na	na	na	na	na	na	na	na	na	na	na	na
A6V	587	834	134	136	94	154	110	180	88	152	281	17	65	148	134	40	84	137	130	151	14	13	213	128	145	137	186	153	364	232	na	na	na	na	na	na	na	na	na	na	na	na	na	na	na	na	na	na	na
A6W	314	165	53	22	3	11	6	na	na	na	172	99	81	34	21	24	16	6	16	na	1	123	52	54	13	18	8	5	15	13	na	na	na	na	na	na	na	na	na	na	na	na	na	na	na	na	na	na	na
A6Y	233	353	139	81	32	161	75	218	94	230	99	396	118	81	83	109	113	115	157	333	222	320	193	85	79	110	233	132	330	254	na	na	na	na	na	na	na	na	na	na	na	na	na	na	na	na	na	na	na
A7*	141	34	2	3	3	na	na	na	na	10	148	11	3	1	na	na	na	na	na	7	148	19	10	3	2	5	na	7	na	3	na	na	na	na	na	na	na	na	na	na	na	na	na	na	na	na	na	na	na
A7C	217	328	103	87	69	102	93	202	68	111	121	219	71	63	86	101	89	308	123	130	198	1313	253	87	81	118	91	131	321	196	na	na	na	na	na	na	na	na	na	na	na	na	na	na	na	na	na	na	na
A7D	195	79	15	8	5	na	na	na	na	na	224	49	31	13	6	4	5	na	3	na	186	39	9	8	7	4	na	na	na	5	na	na	na	na	na	na	na	na	na	na	na	na	na	na	na	na	na	na	na
A7E	30	na	na	na	na	2	3	na	na	na	176	2	4	2	1	na	na	2	na	2	2	2	na	na	na	na	na	na	na	na	na	na	na	na	na	na	na	na	na	na	na	na	na	na	na	na	na	na	na
A7F	78	30	9	2	8	na	na	3	na	na	105	37	14	3	4	na	na	2	na	na	95	16	4	9	na	2	5	3	na	4	na	na	na	na	na	na	na	na	na	na	na	na	na	na	na	na	na	na	na
A7G	1029	1132	226	75	53	73	18	140	15	23	348	606	182	436	105	305	26	253	30	30	5	755	344	207	115	130	46	50	68	72	na	na	na	na	na	na	na	na	na	na	na	na	na	na	na	na	na	na	na
A7H	187	33	19	10	11	2	3	14	na	na	179	39	34	1	3	17	na	na	2	na	251	34	10	6	9	2	5	na	na	4	na	na	na	na	na	na	na	na	na	na	na	na	na	na	na	na	na	na	na
A7I	403	695	231	111	97	261	53	320	50	56	206	356	105	70	101	130	61	99	143	104	378	1	296	172	202	219	104	83	208	139	na	na	na	na	na	na	na	na	na	na	na	na	na	na	na	na	na	na	na
A7K	148	36	12	5	26	3	1	na	7	4	76	33	4	4	7	na	na	3	2	na	202	5	13	2	3	2	2	52	6	3	na	na	na	na	na	na	na	na	na	na	na	na	na	na	na	na	na	na	na
A7L	886	547	172	81	25	57	7	45	na	18	633	656	149	90	42	35	66	10	24	37	887	436	171	106	48	35	10	14	6	40	na	na	na	na	na	na	na	na	na	na	na	na	na	na	na	na	na	na	na
A7M	340	105	31	7	24	na	3	na	na	10	96	129	49	19	7	52	2	3	7	4	294	79	71	18	11	22	4	26	6	7	na	na	na	na	na	na	na	na	na	na	na	na	na	na	na	na	na	na	na
A7N	522	1040	192	77	84	86	37	133	52	45	245	485	78	155	93	489	96	53	94	47	497	463	222	162	130	140	71	140	124	111	na	na	na	na	na	na	na	na	na	na	na	na	na	na	na	na	na	na	na
A7P	460	121	20	15	22	na	1	24	6	11	645	80	28	21	30	6	3	18	6	11	2	1	22	18	8	11	7	3	12	13	na	na	na	na	na	na	na	na	na	na	na	na	na	na	na	na	na	na	na
A7Q	78	6	5	na	3	na	na	na	na	na	130	10	14	4	na	27	na	na	na	na	81	11	5	2	3	4	na	na	na	na	na	na	na	na	na	na	na	na	na	na	na	na	na	na	na	na	na	na	na
A7R	255	58	23	5	13	7	5	10	3	na	227	36	25	11	2	na	2	na	na	3	315	15	8	17	2	7	2	na	na	3	na	na	na	na	na	na	na	na	na	na	na	na	na	na	na	na	na	na	na
A7S	854	832	222	100	176	108	86	125	48	75	526	687	238	195	99	1260	98	83	108	96	1	3	432	189	141	202	108	168	199	162	na	na	na	na	na	na	na	na	na	na	na	na	na	na	na	na	na	na	na
A7T	949	1088	274	75	125	175	99	138	75	87	499	1	197	126	183	169	77	81	111	166	5	1	414	198	153	173	205	109	254	210	na	na	na	na	na	na	na	na	na	na	na	na	na	na	na	na	na	na	na
A7V	1081	1397	371	78	46	73	79	76	42	56	346	2	159	130	201	259	208	78	101	62	5	3	545	243	232	293	103	84	194	139	na	na	na	na	na	na	na	na	na	na	na	na	na	na	na	na	na	na	na
A7W	121	16	11	na	21	2	3	23	7	5	45	21	12	na	7	na	4	6	7	6	116	30	4	5	na	na	na	na	na	5	na	na	na	na	na	na	na	na	na	na	na	na	na	na	na	na	na	na	na
A7Y	78	19	7	2	8	3	na	na	2	na	171	19	6	6	na	na	na	na	2	na	136	13	5	na	na	2	na	na	na	na	na	na	na	na	na	na	na	na	na	na	na	na	na	na	na	na	na	na	na
A81*	na	na	na	na	na	na	na	na	na	na	na	na	na	na	na	na	na	na	na	na	92	4	na	14	na	na	na	na	4	na	na	na	na	na	na	na	na	na	na	na	158	10	16	10	na	11	na	na	na
A81C	na	na	na	na	na	na	na	na	na	na	na	na	na	na	na	na	na	na	na	na	68	104	162	83	77	101	110	167	348	219	na	na	na	na	na	na	na	na	na	na	469	498	169	164	237	253	236	371	328
A81D	na	na	na	na	na	na	na	na	na	na	na	na	na	na	na	na	na	na	na	na	62	1	na	na	na	na	2	na	na	na	na	na	na	na	na	na	na	na	na	na	86	na	na	na	na	na	na	na	na
A81E	na	na	na	na	na	na	na	na	na	na	na	na	na	na	na	na	na	na	na	na	144	10	8	na	5	5	2	na	na	na	na	na	na	na	na	na	na	na	na	na	306	44	20	7	5	6	6	6	na
A81F	na	na	na	na	na	na	na	na	na	na	na	na	na	na	na	na	na	na	na	na	77	67	72	42	39	41	42	39	98	50	na	na	na	na	na	na	na	na	na	na	399	297	87	84	86	80	74	71	62
A81G	na	na	na	na	na	na	na	na	na	na	na	na	na	na	na	na	na	na	na	na	537	559	873	405	576	483	452	527	1234	687	na	na	na	na	na	na	na	na	na	na	2605	3237	1009	1410	1310	1379	1150	1623	1262
A81H	na	na	na	na	na	na	na	na	na	na	na	na	na	na	na	na	na	na	na	na	119	51	65	27	10	25	17	8	13	13	na	na	na	na	na	na	na	na	na	na	329	249	34	69	26	14	18	22	11
A81I	na	na	na	na	na	na	na	na	na	na	na	na	na	na	na	na	na	na	na	na	110	196	203	95	256	179	152	151	546	304	na	na	na	na	na	na	na	na	na	na	551	433	218	245	302	327	286	456	407
A81K	na	na	na	na	na	na	na	na	na	na	na	na	na	na	na	na	na	na	na	na	197	13	15	5	4	20	9	6	14	9	na	na	na	na	na	na	na	na	na	na	467	40	28	21	16	18	14	11	12
A81L	na	na	na	na	na	na	na	na	na	na	na	na	na	na	na	na	na	na	na	na	574	723	726	463	444	565	579	610	1582	1045	na	na	na	na	na	na	na	na	na	na	2192	2645	979	1023	1321	1267	1145	1699	1502
A81M	na	na	na	na	na	na	na	na	na	na	na	na	na	na	na	na	na	na	na	na	189	222	334	173	317	242	252	315	735	392	na	na	na	na	na	na	na	na	na	na	889	679	351	445	538	589	511	778	594
A81N	na	na	na	na	na	na	na	na	na	na	na	na	na	na	na	na	na	na	na	na	132	12	6	3	2	4	na	2	4	na	na	na	na	na	na	na	na	na	na	na	202	219	17	15	6	4	12	32	31
A81P	na	na	na	na	na	na	na	na	na	na	na	na	na	na	na	na	na	na	na	na	413	201	75	39	36	14	7	13	7	8	na	na	na	na	na	na	na	na	na	na	794	534	86	19	46	29	17	18	22
A81Q	na	na	na	na	na	na	na	na	na	na	na	na	na	na	na	na	na	na	na	na	62	30	15	5	29	4	4	na	8	7	na	na	na	na	na	na	na	na	na	na	208	90	24	14	14	6	9	7	16
A81R	na	na	na	na	na	na	na	na	na	na	na	na	na	na	na	na	na	na	na	na	171	12	14	7	5	5	3	4	7	3	na	na	na	na	na	na	na	na	na	na	475	140	32	22	24	24	19	40	68
A81S	na	na	na	na	na	na	na	na	na	na	na	na	na	na	na	na	na	na	na	na	347	277	222	170	134	183	134	152	275	195	na	na	na	na	na	na	na	na	na	na	1155	1177	325	314	367	301	264	424	214
A81T	na	na	na	na	na	na	na	na	na	na	na	na	na	na	na	na	na	na	na	na	291	424	492	185	197	249	339	375	840	575	na	na	na	na	na	na	na	na	na	na	962	1320	412	467	602	582	598	1097	764
A81V	na	na	na	na	na	na	na	na	na	na	na	na	na	na	na	na	na	na	na	na	438	608	572	346	387	624	568	547	1640	1085	na	na	na	na	na	na	na	na	na	na	1838	2779	828	1004	1219	1186	1233	2146	1755
A81W	na	na	na	na	na	na	na	na	na	na	na	na	na	na	na	na	na	na	na	na	249	168	123	61	130	71	31	26	97	76	na	na	na	na	na	na	na	na	na	na	833	524	214	136	147	113	86	143	116
A81Y	na	na	na	na	na	na	na	na	na	na	na	na	na	na	na	na	na	na	na	na	136	62	67	43	46	46	56	21	50	46	na	na	na	na	na	na	na	na	na	na	300	178	91	76	69	105	53	76	30
A83*	na	na	na	na	na	na	na	na	na	na	na	na	na	na	na	na	na	na	na	na	151	11	10	3	na	na	na	na	na	8	na	na	na	na	na	na	na	na	na	na	241	45	19	10	10	15	4	28	20
A83C	na	na	na	na	na	na	na	na	na	na	na	na	na	na	na	na	na	na	na	na	114	65	73	82	51	60	69	48	159	90	na	na	na	na	na	na	na	na	na	na	277	121	107	106	170	145	139	164	188
A83D	na	na	na	na	na	na	na	na	na	na	na	na	na	na	na	na	na	na	na	na	180	239	321	196	151	216	145	187	471	303	na	na	na	na	na	na	na	na	na	na	760	986	341	305	382	347	388	413	289
A83E	na	na	na	na	na	na	na	na	na	na	na	na	na	na	na	na	na	na	na	na	858	913	1113	439	613	604	607	518	1304	892	na	na	na	na	na	na	na	na	na	na	2347	2273	770	932	1185	1085	1021	1404	1083
A83F	na	na	na	na	na	na	na	na	na	na	na	na	na	na	na	na	na	na	na	na	181	259	189	118	219	145	214	245	457	306	na	na	na	na	na	na	na	na	na	na	746	938	293	277	405	350	379	501	415
A83G	na	na	na	na	na	na	na	na	na	na	na	na	na	na	na	na	na	na	na	na	3055	4088	4378	2247	2412	2855	2616	2898	6094	4095	na	na	na	na	na	na	na	na	na	na	10894	11675	4103	4425	5575	5943	4992	6867	5113
A83H	na	na	na	na	na	na	na	na	na	na	na	na	na	na	na	na	na	na	na	na	118	143	165	104	108	118	71	76	282	168	na	na	na	na	na	na	na	na	na	na	187	256	112	131	197	144	145	201	140
A83I	na	na	na	na	na	na	na	na	na	na	na	na	na	na	na	na	na	na	na	na	152	209	205	80	118	132	138	141	463	228	na	na	na	na	na	na	na	na	na	na	524	653	261	253	377	410	305	453	395
A83K	na	na	na	na	na	na	na	na	na	na	na	na	na	na	na	na	na	na	na	na	1331	1726	1694	983	1256	1249	1196	1506	2785	1925	na	na	na	na	na	na	na	na	na	na	4422	7283	1841	1963	2506	2290	2236	3124	2252
A83L	na	na	na	na	na	na	na	na	na	na	na	na	na	na	na	na	na	na	na	na	855	1269	979	567	522	679	711	586	1586	973	na	na	na	na	na	na	na	na	na	na	2592	2178	905	1072	1320	1508	1270	1690	1274
A83M	na	na	na	na	na	na	na	na	na	na	na	na	na	na	na	na	na	na	na	na	388	497	547	276	320	350	303	441	874	573	na	na	na	na	na	na	na	na	na	na	1230	1215	493	532	709	802	655	1014	881
A83N	na	na	na	na	na	na	na	na	na	na	na	na	na	na	na	na	na	na	na	na	411	542	527	348	380	390	427	390	905	631	na	na	na	na	na	na	na	na	na	na	1378	1765	461	593	853	794	725	1091	856
A83P	na	na	na	na	na	na	na	na	na	na	na	na	na	na	na	na	na	na	na	na	55	93	120	55	65	92	94	48	241	167	na	na	na	na	na	na	na	na	na	na	219	258	88	88	145	154	108	193	164
A83Q	na	na	na	na	na	na	na	na	na	na	na	na	na	na	na	na	na	na	na	na	278	375	325	187	180	236	247	214	567	344	na	na	na	na	na	na	na	na	na	na	891	741	373	343	481	488	412	568	455
A83R	na	na	na	na	na	na	na	na	na	na	na	na	na	na	na	na	na	na	na	na	794	1029	1137	496	623	711	614	947	1397	988	na	na	na	na	na	na	na	na	na	na	2641	2891	1021	1057	1316	1284	1197	1744	1280
A83S	na	na	na	na	na	na	na	na	na	na	na	na	na	na	na	na	na	na	na	na	169	223	139	147	85	99	172	124	367	243	na	na	na	na	na	na	na	na	na	na	658	446	186	204	248	326	256	364	263
A83T	na	na	na	na	na	na	na	na	na	na	na	na	na	na	na	na	na	na	na	na	142	163	124	64	95	125	91	114	224	154	na	na	na	na	na	na	na	na	na	na	415	404	104	91	154	129	130	155	126
A83V	na	na	na	na	na	na	na	na	na	na	na	na	na	na	na	na	na	na	na	na	756	1006	959	534	462	569	556	634	1529	1033	na	na	na	na	na	na	na	na	na	na	2743	3688	1038	1128	1501	1314	1309	2011	1565
A83W	na	na	na	na	na	na	na	na	na	na	na	na	na	na	na	na	na	na	na	na	480	458	542	300	574	429	461	451	1037	642	na	na	na	na	na	na	na	na	na	na	1421	1759	523	554	850	888	744	1189	929
A83Y	na	na	na	na	na	na	na	na	na	na	na	na	na	na	na	na	na	na	na	na	106	142	130	84	59	112	86	100	246	137	na	na	na	na	na	na	na	na	na	na	320	295	142	161	226	198	180	184	186
A84*	na	na	na	na	na	na	na	na	na	na	na	na	na	na	na	na	na	na	na	na	85	1	3	na	na	3	na	na	na	na	na	na	na	na	na	na	na	na	na	na	149	16	6	19	na	7	11	na	na
A84C	na	na	na	na	na	na	na	na	na	na	na	na	na	na	na	na	na	na	na	na	21	17	12	6	3	8	10	3	24	18	na	na	na	na	na	na	na	na	na	na	36	42	16	18	18	13	19	29	31
A84D	na	na	na	na	na	na	na	na	na	na	na	na	na	na	na	na	na	na	na	na	354	380	294	183	193	238	208	208	411	336	na	na	na	na	na	na	na	na	na	na	740	954	268	325	487	376	329	469	381
A84E	na	na	na	na	na	na	na	na	na	na	na	na	na	na	na	na	na	na	na	na	754	703	908	387	482	449	401	284	864	574	na	na	na	na	na	na	na	na	na	na	2436	2090	820	768	966	881	774	865	726
A84F	na	na	na	na	na	na	na	na	na	na	na	na	na	na	na	na	na	na	na	na	17	18	36	9	5	10	15	49	37	24	na	na	na	na	na	na	na	na	na	na	78	121	28	16	24	34	28	70	48
A84G	na	na	na	na	na	na	na	na	na	na	na	na	na	na	na	na	na	na	na	na	1091	1207	1584	801	909	880	834	643	1991	1178	na	na	na	na	na	na	na	na	na	na	5092	5551	1816	1889	2347	2181	1881	2663	1659
A84H	na	na	na	na	na	na	na	na	na	na	na	na	na	na	na	na	na	na	na	na	159	166	181	117	119	165	235	165	473	274	na	na	na	na	na	na	na	na	na	na	490	415	197	235	300	317	333	436	400
A84I	na	na	na	na	na	na	na	na	na	na	na	na	na	na	na	na	na	na	na	na	242	195	249	153	116	177	195	189	339	299	na	na	na	na	na	na	na	na	na	na	597	812	269	280	346	342	300	418	313
A84K	na	na	na	na	na	na	na	na	na	na	na	na	na	na	na	na	na	na	na	na	1043	1048	1227	686	660	735	727	640	1408	1099	na	na	na	na	na	na	na	na	na	na	3407	3910	1318	1360	1648	1510	1280	1814	1273
A84L	na	na	na	na	na	na	na	na	na	na	na	na	na	na	na	na	na	na	na	na	232	295	350	202	223	231	231	164	558	367	na	na	na	na	na	na	na	na	na	na	849	1107	402	427	538	543	514	666	575
A84M	na	na	na	na	na	na	na	na	na	na	na	na	na	na	na	na	na	na	na	na	341	383	473	243	299	248	221	213	558	411	na	na	na	na	na	na	na	na	na	na	1140	1540	430	466	630	564	534	652	496
A84N	na	na	na	na	na	na	na	na	na	na	na	na	na	na	na	na	na	na	na	na	378	494	485	312	278	345	308	317	1031	669	na	na	na	na	na	na	na	na	na	na	1409	1479	546	520	720	698	649	933	736
A84P	na	na	na	na	na	na	na	na	na	na	na	na	na	na	na	na	na	na	na	na	591	646	630	366	387	472	415	400	879	543	na	na	na	na	na	na	na	na	na	na	1735	1804	574	640	751	774	649	873	689
A84Q	na	na	na	na	na	na	na	na	na	na	na	na	na	na	na	na	na	na	na	na	128	136	144	74	68	86	54	92	166	99	na	na	na	na	na	na	na	na	na	na	385	290	142	120	191	260	157	215	137
A84R	na	na	na	na	na	na	na	na	na	na	na	na	na	na	na	na	na	na	na	na	630	740	742	435	399	531	427	413	969	669	na	na	na	na	na	na	na	na	na	na	2348	2459	909	892	1092	998	815	1229	780
A84S	na	na	na	na	na	na	na	na	na	na	na	na	na	na	na	na	na	na	na	na	247	263	267	119	144	170	201	196	411	360	na	na	na	na	na	na	na	na	na	na	778	884	295	313	420	319	338	444	337
A84T	na	na	na	na	na	na	na	na	na	na	na	na	na	na	na	na	na	na	na	na	632	845	533	430	274	449	400	361	1260	767	na	na	na	na	na	na	na	na	na	na	1647	2130	521	491	607	610	579	1004	645
A84V	na	na	na	na	na	na	na	na	na	na	na	na	na	na	na	na	na	na	na	na	565	613	660	381	311	512	509	547	1182	784	na	na	na	na	na	na	na	na	na	na	2900	4323	965	1276	1460	1356	1233	1705	1385
A84W	na	na	na	na	na	na	na	na	na	na	na	na	na	na	na	na	na	na	na	na	31	53	95	30	25	38	26	54	93	88	na	na	na	na	na	na	na	na	na	na	214	289	65	95	78	77	130	131	87
A84Y	na	na	na	na	na	na	na	na	na	na	na	na	na	na	na	na	na	na	na	na	60	70	69	41	74	73	58	61	199	103	na	na	na	na	na	na	na	na	na	na	170	171	82	113	101	128	99	146	138
A9*	92	66	23	9	4	na	na	9	3	na	102	27	5	2	2	na	4	na	2	27	133	16	7	11	3	2	13	na	11	na	na	na	na	na	na	na	na	na	na	na	na	na	na	na	na	na	na	na	na
A9C	339	620	224	92	194	319	99	274	95	228	153	363	109	86	96	143	93	69	160	203	281	357	280	172	322	194	177	162	469	370	na	na	na	na	na	na	na	na	na	na	na	na	na	na	na	na	na	na	na
A9D	433	615	191	82	48	99	72	88	33	41	177	330	97	57	89	96	69	36	76	52	354	514	230	133	118	137	73	149	149	107	na	na	na	na	na	na	na	na	na	na	na	na	na	na	na	na	na	na	na
A9E	481	778	194	38	na	na	12	246	2	2	203	508	20	66	56	151	9	3	50	2	1	720	260	88	133	97	109	56	82	110	na	na	na	na	na	na	na	na	na	na	na	na	na	na	na	na	na	na	na
A9F	436	439	153	77	97	39	28	111	23	45	204	507	137	69	74	43	67	66	73	61	359	482	197	108	114	95	96	85	104	129	na	na	na	na	na	na	na	na	na	na	na	na	na	na	na	na	na	na	na
A9G	1805	3552	1054	644	572	536	592	845	454	799	738	1929	612	440	455	997	520	714	680	874	1	2110	1464	850	885	1065	790	854	1696	1559	na	na	na	na	na	na	na	na	na	na	na	na	na	na	na	na	na	na	na
A9H	277	230	106	24	13	na	13	na	2	na	164	218	105	39	25	2	10	6	13	9	1	285	102	38	24	26	18	2	17	17	na	na	na	na	na	na	na	na	na	na	na	na	na	na	na	na	na	na	na
A9I	321	589	127	93	88	165	111	207	101	227	201	362	122	121	114	131	157	156	202	206	361	574	354	156	184	200	172	233	497	349	na	na	na	na	na	na	na	na	na	na	na	na	na	na	na	na	na	na	na
A9K	545	319	126	45	17	2	11	30	3	2	233	296	46	52	52	40	57	7	22	26	471	262	136	39	58	30	14	13	21	16	na	na	na	na	na	na	na	na	na	na	na	na	na	na	na	na	na	na	na
A9L	1857	3006	855	512	649	379	399	821	499	829	813	1758	530	548	542	660	441	424	590	784	1566	1	1526	712	828	893	720	854	1647	1223	na	na	na	na	na	na	na	na	na	na	na	na	na	na	na	na	na	na	na
A9M	667	693	230	99	64	60	47	125	41	49	371	525	135	125	73	99	51	80	53	45	536	600	273	183	200	157	63	39	83	92	na	na	na	na	na	na	na	na	na	na	na	na	na	na	na	na	na	na	na
A9N	396	1000	333	223	289	532	356	983	579	1167	210	590	393	169	260	424	480	405	574	1256	395	3	627	265	280	468	557	604	1784	1138	na	na	na	na	na	na	na	na	na	na	na	na	na	na	na	na	na	na	na
A9P	890	772	211	123	83	22	9	58	22	52	369	575	199	120	75	62	36	89	29	79	711	644	178	102	105	124	38	25	40	61	na	na	na	na	na	na	na	na	na	na	na	na	na	na	na	na	na	na	na
A9Q	547	581	166	57	82	54	42	89	24	34	222	563	114	155	85	43	53	42	41	66	433	398	201	116	119	145	75	73	115	112	na	na	na	na	na	na	na	na	na	na	na	na	na	na	na	na	na	na	na
A9R	1105	572	175	69	44	17	11	21	19	22	952	520	154	93	66	19	14	15	31	36	1016	409	212	58	59	55	38	18	26	28	na	na	na	na	na	na	na	na	na	na	na	na	na	na	na	na	na	na	na
A9S	1066	1926	483	349	451	400	378	940	460	833	524	1210	321	431	391	1356	572	319	527	844	1	1101	910	501	702	690	702	627	2059	1387	na	na	na	na	na	na	na	na	na	na	na	na	na	na	na	na	na	na	na
A9T	1037	1984	574	1118	543	677	665	1315	1054	2244	333	1	637	693	494	1217	798	631	1101	1627	831	2	964	531	606	779	964	1094	3525	2334	na	na	na	na	na	na	na	na	na	na	na	na	na	na	na	na	na	na	na
A9V	1414	1672	426	208	211	308	244	507	195	437	517	6	198	236	254	360	307	231	331	497	3	15	721	401	289	451	344	328	1064	847	na	na	na	na	na	na	na	na	na	na	na	na	na	na	na	na	na	na	na
A9W	792	730	172	58	46	68	24	93	18	24	323	1	204	119	114	127	59	35	46	106	1	709	246	107	109	165	48	31	104	96	na	na	na	na	na	na	na	na	na	na	na	na	na	na	na	na	na	na	na
A9Y	280	253	92	14	15	64	11	33	4	10	157	230	70	32	28	76	11	18	34	19	241	197	69	48	34	41	22	9	54	57	na	na	na	na	na	na	na	na	na	na	na	na	na	na	na	na	na	na	na
C152*	na	na	na	na	na	na	na	na	na	na	na	na	na	na	na	na	na	na	na	na	na	na	na	na	na	na	na	na	na	na	51	10	3	na	na	2	na	na	3	na	78	4	na	9	4	na	na	na	na
C152A	na	na	na	na	na	na	na	na	na	na	na	na	na	na	na	na	na	na	na	na	na	na	na	na	na	na	na	na	na	na	357	385	186	184	194	149	246	213	274	264	5	1087	395	481	543	532	526	710	634
C152D	na	na	na	na	na	na	na	na	na	na	na	na	na	na	na	na	na	na	na	na	na	na	na	na	na	na	na	na	na	na	119	271	85	90	82	58	115	138	150	200	275	420	191	220	324	274	287	421	288
C152E	na	na	na	na	na	na	na	na	na	na	na	na	na	na	na	na	na	na	na	na	na	na	na	na	na	na	na	na	na	na	322	581	220	293	255	191	293	373	397	511	816	1260	608	701	787	871	790	1057	916
C152F	na	na	na	na	na	na	na	na	na	na	na	na	na	na	na	na	na	na	na	na	na	na	na	na	na	na	na	na	na	na	224	299	72	104	111	65	104	148	142	111	592	4	208	284	256	329	275	360	275
C152G	na	na	na	na	na	na	na	na	na	na	na	na	na	na	na	na	na	na	na	na	na	na	na	na	na	na	na	na	na	na	688	1258	672	555	578	466	831	954	1058	1068	3	2862	1319	1530	2014	1982	2106	3148	2661
C152H	na	na	na	na	na	na	na	na	na	na	na	na	na	na	na	na	na	na	na	na	na	na	na	na	na	na	na	na	na	na	140	216	80	131	124	78	185	194	184	224	366	648	186	293	424	388	370	509	513
C152I	na	na	na	na	na	na	na	na	na	na	na	na	na	na	na	na	na	na	na	na	na	na	na	na	na	na	na	na	na	na	95	171	52	47	48	37	67	90	102	79	234	287	124	126	179	207	157	275	244
C152K	na	na	na	na	na	na	na	na	na	na	na	na	na	na	na	na	na	na	na	na	na	na	na	na	na	na	na	na	na	na	247	537	158	188	198	127	276	341	358	416	616	906	372	506	671	615	600	917	870
C152L	na	na	na	na	na	na	na	na	na	na	na	na	na	na	na	na	na	na	na	na	na	na	na	na	na	na	na	na	na	na	749	1413	548	564	566	438	886	989	1053	1134	1775	2941	1276	1573	2057	2059	1835	2863	2224
C152M	na	na	na	na	na	na	na	na	na	na	na	na	na	na	na	na	na	na	na	na	na	na	na	na	na	na	na	na	na	na	152	318	134	101	103	96	180	223	210	281	354	510	227	267	369	334	361	590	556
C152N	na	na	na	na	na	na	na	na	na	na	na	na	na	na	na	na	na	na	na	na	na	na	na	na	na	na	na	na	na	na	124	238	90	93	109	67	124	175	168	189	331	441	154	259	243	328	305	470	424
C152P	na	na	na	na	na	na	na	na	na	na	na	na	na	na	na	na	na	na	na	na	na	na	na	na	na	na	na	na	na	na	201	84	14	13	6	10	na	6	8	5	399	86	35	19	7	14	10	16	16
C152Q	na	na	na	na	na	na	na	na	na	na	na	na	na	na	na	na	na	na	na	na	na	na	na	na	na	na	na	na	na	na	134	253	77	105	104	58	124	175	192	196	358	558	216	274	364	331	303	499	430
C152R	na	na	na	na	na	na	na	na	na	na	na	na	na	na	na	na	na	na	na	na	na	na	na	na	na	na	na	na	na	na	290	717	197	258	265	172	389	483	494	539	4	1290	550	724	837	839	866	1273	1118
C152S	na	na	na	na	na	na	na	na	na	na	na	na	na	na	na	na	na	na	na	na	na	na	na	na	na	na	na	na	na	na	2	756	213	260	231	226	417	531	563	672	761	1330	491	639	879	1078	823	1473	1218
C152T	na	na	na	na	na	na	na	na	na	na	na	na	na	na	na	na	na	na	na	na	na	na	na	na	na	na	na	na	na	na	332	642	193	262	229	245	354	487	489	614	805	1176	526	752	816	862	969	1481	1242
C152V	na	na	na	na	na	na	na	na	na	na	na	na	na	na	na	na	na	na	na	na	na	na	na	na	na	na	na	na	na	na	391	580	212	212	237	167	275	320	300	314	1043	1152	490	501	612	612	651	878	696
C152W	na	na	na	na	na	na	na	na	na	na	na	na	na	na	na	na	na	na	na	na	na	na	na	na	na	na	na	na	na	na	132	263	96	103	101	76	176	170	183	189	377	563	241	269	357	376	400	608	558
C152Y	na	na	na	na	na	na	na	na	na	na	na	na	na	na	na	na	na	na	na	na	na	na	na	na	na	na	na	na	na	na	33	37	45	7	18	9	6	18	37	37	4	115	22	34	20	15	16	57	29
C85*	na	na	na	na	na	na	na	na	na	na	na	na	na	na	na	na	na	na	na	na	121	8	5	5	4	5	na	na	na	na	na	na	na	na	na	na	na	na	na	na	182	na	17	5	na	7	5	na	na
C85A	na	na	na	na	na	na	na	na	na	na	na	na	na	na	na	na	na	na	na	na	1002	1210	887	632	586	710	672	734	1701	1229	na	na	na	na	na	na	na	na	na	na	1878	2104	765	966	1230	1053	1092	1622	1272
C85D	na	na	na	na	na	na	na	na	na	na	na	na	na	na	na	na	na	na	na	na	393	460	451	241	309	390	214	265	542	364	na	na	na	na	na	na	na	na	na	na	912	1096	377	389	449	389	376	477	390
C85E	na	na	na	na	na	na	na	na	na	na	na	na	na	na	na	na	na	na	na	na	777	1185	1004	591	542	653	571	599	1311	863	na	na	na	na	na	na	na	na	na	na	2199	2200	1035	1103	1284	1211	1009	1397	1008
C85F	na	na	na	na	na	na	na	na	na	na	na	na	na	na	na	na	na	na	na	na	20	12	13	15	16	21	34	76	66	61	na	na	na	na	na	na	na	na	na	na	40	34	31	30	30	36	37	36	61
C85G	na	na	na	na	na	na	na	na	na	na	na	na	na	na	na	na	na	na	na	na	2355	2430	2587	1453	1722	2070	1678	1551	4101	2620	na	na	na	na	na	na	na	na	na	na	6467	7289	2341	2876	3539	3503	3156	4260	3224
C85H	na	na	na	na	na	na	na	na	na	na	na	na	na	na	na	na	na	na	na	na	122	153	173	104	245	202	200	240	626	422	na	na	na	na	na	na	na	na	na	na	324	356	187	207	335	335	303	511	601
C85I	na	na	na	na	na	na	na	na	na	na	na	na	na	na	na	na	na	na	na	na	628	523	636	332	395	495	596	799	1886	1152	na	na	na	na	na	na	na	na	na	na	1039	1299	438	569	833	788	901	1438	1451
C85K	na	na	na	na	na	na	na	na	na	na	na	na	na	na	na	na	na	na	na	na	1172	1335	1327	797	787	1030	886	844	2125	1295	na	na	na	na	na	na	na	na	na	na	3392	4125	1492	1407	1789	1673	1464	1976	1669
C85L	na	na	na	na	na	na	na	na	na	na	na	na	na	na	na	na	na	na	na	na	312	505	290	271	386	337	437	469	1539	884	na	na	na	na	na	na	na	na	na	na	1055	920	438	500	650	790	753	1431	1612
C85M	na	na	na	na	na	na	na	na	na	na	na	na	na	na	na	na	na	na	na	na	439	561	398	301	379	490	529	607	1610	966	na	na	na	na	na	na	na	na	na	na	1104	1172	461	565	843	955	815	1497	1342
C85N	na	na	na	na	na	na	na	na	na	na	na	na	na	na	na	na	na	na	na	na	856	1309	1015	553	1057	798	861	995	2567	1835	na	na	na	na	na	na	na	na	na	na	2124	2541	885	1178	1548	1856	1506	2516	2074
C85P	na	na	na	na	na	na	na	na	na	na	na	na	na	na	na	na	na	na	na	na	822	961	877	503	544	719	681	759	1725	1125	na	na	na	na	na	na	na	na	na	na	1973	1925	792	914	1212	1235	1099	1574	1408
C85Q	na	na	na	na	na	na	na	na	na	na	na	na	na	na	na	na	na	na	na	na	258	288	323	199	210	222	226	305	829	409	na	na	na	na	na	na	na	na	na	na	636	1049	297	355	566	473	425	755	607
C85R	na	na	na	na	na	na	na	na	na	na	na	na	na	na	na	na	na	na	na	na	841	1053	1090	669	601	736	622	727	1705	1093	na	na	na	na	na	na	na	na	na	na	2571	3481	1042	1074	1324	1249	1007	1637	1289
C85S	na	na	na	na	na	na	na	na	na	na	na	na	na	na	na	na	na	na	na	na	492	632	594	326	379	409	368	316	899	664	na	na	na	na	na	na	na	na	na	na	1218	1337	487	518	702	720	659	804	665
C85T	na	na	na	na	na	na	na	na	na	na	na	na	na	na	na	na	na	na	na	na	1394	1644	1661	955	987	1182	1088	1023	2652	1739	na	na	na	na	na	na	na	na	na	na	3240	4450	1284	1573	1938	1855	1892	2699	2060
C85V	na	na	na	na	na	na	na	na	na	na	na	na	na	na	na	na	na	na	na	na	719	1019	1156	546	603	715	749	628	1982	1259	na	na	na	na	na	na	na	na	na	na	2346	2776	1005	1254	1677	1618	1486	2323	1920
C85W	na	na	na	na	na	na	na	na	na	na	na	na	na	na	na	na	na	na	na	na	117	176	196	128	184	151	120	182	416	330	na	na	na	na	na	na	na	na	na	na	459	768	199	237	326	332	292	457	410
C85Y	na	na	na	na	na	na	na	na	na	na	na	na	na	na	na	na	na	na	na	na	22	76	115	27	41	41	49	40	153	77	na	na	na	na	na	na	na	na	na	na	106	115	43	99	78	74	85	116	118
D11*	190	57	5	3	6	5	9	5	na	2	214	37	22	89	9	3	3	na	4	na	266	17	21	6	na	4	na	na	4	6	na	na	na	na	na	na	na	na	na	na	na	na	na	na	na	na	na	na	na
D116*	na	na	na	na	na	na	na	na	na	na	na	na	na	na	na	na	na	na	na	na	116	10	4	5	3	2	3	na	6	3	na	na	na	na	na	na	na	na	na	na	208	92	13	7	10	11	9	5	13
D116A	na	na	na	na	na	na	na	na	na	na	na	na	na	na	na	na	na	na	na	na	219	332	378	176	157	308	321	311	712	592	na	na	na	na	na	na	na	na	na	na	738	789	430	628	775	812	851	1264	1121
D116C	na	na	na	na	na	na	na	na	na	na	na	na	na	na	na	na	na	na	na	na	122	249	187	125	129	195	229	269	724	371	na	na	na	na	na	na	na	na	na	na	419	357	274	367	486	587	568	859	767
D116E	na	na	na	na	na	na	na	na	na	na	na	na	na	na	na	na	na	na	na	na	367	416	576	315	309	370	423	568	1155	737	na	na	na	na	na	na	na	na	na	na	1077	2123	691	911	1113	1082	998	1693	1421
D116F	na	na	na	na	na	na	na	na	na	na	na	na	na	na	na	na	na	na	na	na	445	862	842	506	503	648	771	774	2433	1619	na	na	na	na	na	na	na	na	na	na	1487	2250	951	1512	2047	1891	2058	3354	3193
D116G	na	na	na	na	na	na	na	na	na	na	na	na	na	na	na	na	na	na	na	na	820	1453	1733	814	1029	1185	1549	1566	4622	2927	na	na	na	na	na	na	na	na	na	na	3343	4272	2079	3011	3561	4190	4289	6811	6120
D116H	na	na	na	na	na	na	na	na	na	na	na	na	na	na	na	na	na	na	na	na	242	473	546	310	399	441	721	782	1954	1258	na	na	na	na	na	na	na	na	na	na	761	990	661	1028	1232	1430	1507	2620	2915
D116I	na	na	na	na	na	na	na	na	na	na	na	na	na	na	na	na	na	na	na	na	162	275	314	185	348	294	347	316	1122	694	na	na	na	na	na	na	na	na	na	na	552	818	346	559	781	825	824	1581	1446
D116K	na	na	na	na	na	na	na	na	na	na	na	na	na	na	na	na	na	na	na	na	419	881	938	544	636	719	929	1010	2763	1692	na	na	na	na	na	na	na	na	na	na	1470	2079	1239	1575	1962	2877	2319	3479	3454
D116L	na	na	na	na	na	na	na	na	na	na	na	na	na	na	na	na	na	na	na	na	1017	1539	1899	991	1262	1696	1760	2073	5871	3640	na	na	na	na	na	na	na	na	na	na	3027	4323	2263	3056	4105	4505	4741	7580	7243
D116M	na	na	na	na	na	na	na	na	na	na	na	na	na	na	na	na	na	na	na	na	252	350	329	247	278	423	448	476	1558	1144	na	na	na	na	na	na	na	na	na	na	700	1118	539	735	1012	1000	1238	2045	1988
D116N	na	na	na	na	na	na	na	na	na	na	na	na	na	na	na	na	na	na	na	na	223	371	364	167	215	192	302	309	738	471	na	na	na	na	na	na	na	na	na	na	572	793	281	413	447	583	487	961	735
D116P	na	na	na	na	na	na	na	na	na	na	na	na	na	na	na	na	na	na	na	na	723	975	1037	564	581	688	641	539	1454	1053	na	na	na	na	na	na	na	na	na	na	1894	2724	1290	1607	1892	1752	1564	1832	1544
D116Q	na	na	na	na	na	na	na	na	na	na	na	na	na	na	na	na	na	na	na	na	183	383	394	236	291	319	393	407	1201	673	na	na	na	na	na	na	na	na	na	na	733	990	557	691	830	860	965	1344	1338
D116R	na	na	na	na	na	na	na	na	na	na	na	na	na	na	na	na	na	na	na	na	757	1431	1678	831	1029	1175	1702	1785	4859	3079	na	na	na	na	na	na	na	na	na	na	2659	3801	1764	2953	3694	4435	4389	6831	6530
D116S	na	na	na	na	na	na	na	na	na	na	na	na	na	na	na	na	na	na	na	na	407	1320	755	342	366	527	495	591	1594	1079	na	na	na	na	na	na	na	na	na	na	1327	1855	820	1100	1437	1313	1341	2090	1851
D116T	na	na	na	na	na	na	na	na	na	na	na	na	na	na	na	na	na	na	na	na	366	454	558	288	480	569	514	484	1568	906	na	na	na	na	na	na	na	na	na	na	987	1381	647	873	1177	1309	1159	1835	1626
D116V	na	na	na	na	na	na	na	na	na	na	na	na	na	na	na	na	na	na	na	na	350	727	636	322	407	484	549	637	1829	1046	na	na	na	na	na	na	na	na	na	na	1183	2524	743	1079	1332	1449	1552	2507	2199
D116W	na	na	na	na	na	na	na	na	na	na	na	na	na	na	na	na	na	na	na	na	422	795	796	440	554	628	696	732	2337	1388	na	na	na	na	na	na	na	na	na	na	1475	2397	1000	1569	1967	2190	2231	3389	3091
D116Y	na	na	na	na	na	na	na	na	na	na	na	na	na	na	na	na	na	na	na	na	173	254	256	205	189	287	304	260	1107	674	na	na	na	na	na	na	na	na	na	na	484	774	298	477	592	665	768	1259	1193
D11A	693	1231	346	265	420	221	255	341	289	630	280	738	240	403	204	429	359	343	481	655	534	2	519	266	503	423	372	543	1397	646	na	na	na	na	na	na	na	na	na	na	na	na	na	na	na	na	na	na	na
D11C	184	271	106	58	29	98	54	38	33	36	117	202	56	42	33	79	50	47	48	43	149	118	205	101	61	87	62	34	101	91	na	na	na	na	na	na	na	na	na	na	na	na	na	na	na	na	na	na	na
D11E	1305	2397	621	549	517	389	501	925	563	952	659	1	571	361	576	655	539	544	826	1242	2	4	1172	587	734	745	790	785	2148	1474	na	na	na	na	na	na	na	na	na	na	na	na	na	na	na	na	na	na	na
D11F	464	466	148	52	74	62	39	39	6	15	260	343	122	123	70	2175	26	30	59	82	396	346	275	81	89	109	67	14	87	76	na	na	na	na	na	na	na	na	na	na	na	na	na	na	na	na	na	na	na
D11G	7029	12397	4161	2723	2932	2816	2789	4959	2902	5995	3060	3	2844	2211	2659	4744	3635	3669	3911	5399	7	10995	6376	3290	4016	4697	4354	4181	11064	8095	na	na	na	na	na	na	na	na	na	na	na	na	na	na	na	na	na	na	na
D11H	237	614	175	95	109	55	39	85	48	51	92	1	75	43	93	317	62	32	84	81	214	1	214	118	117	129	144	38	191	87	na	na	na	na	na	na	na	na	na	na	na	na	na	na	na	na	na	na	na
D11I	260	197	48	24	15	5	3	na	6	8	187	95	29	19	21	24	na	2	3	3	227	132	42	18	7	15	7	na	6	4	na	na	na	na	na	na	na	na	na	na	na	na	na	na	na	na	na	na	na
D11K	2366	5082	1687	1324	1730	1338	1727	3350	2379	4438	1249	2697	1208	1536	1288	5718	1929	2011	2690	3628	1960	4119	2788	1533	1714	2288	2607	2914	8129	5214	na	na	na	na	na	na	na	na	na	na	na	na	na	na	na	na	na	na	na
D11L	1240	1695	463	253	1336	164	175	234	159	204	620	963	354	321	340	1549	215	181	284	284	1013	1223	651	375	393	396	284	279	524	395	na	na	na	na	na	na	na	na	na	na	na	na	na	na	na	na	na	na	na
D11M	612	924	253	174	206	165	178	190	88	191	265	504	136	228	171	220	231	162	206	167	499	647	448	221	333	294	251	216	473	360	na	na	na	na	na	na	na	na	na	na	na	na	na	na	na	na	na	na	na
D11N	892	1483	537	286	184	215	285	359	123	230	421	2	334	255	280	807	217	303	247	205	1	2	1118	416	454	477	379	275	840	598	na	na	na	na	na	na	na	na	na	na	na	na	na	na	na	na	na	na	na
D11P	262	355	122	113	47	40	60	151	48	112	254	340	75	66	50	159	101	54	101	102	187	284	206	93	104	199	105	123	307	231	na	na	na	na	na	na	na	na	na	na	na	na	na	na	na	na	na	na	na
D11Q	400	677	274	261	269	169	230	665	258	632	228	508	95	160	181	335	278	258	354	491	360	3471	324	270	277	282	380	456	1166	734	na	na	na	na	na	na	na	na	na	na	na	na	na	na	na	na	na	na	na
D11R	1743	3160	1033	783	1089	663	1053	2279	1210	2137	708	2098	1078	1249	671	1156	995	1945	1429	2222	1462	2582	1781	1036	1171	1328	1426	1646	4381	2721	na	na	na	na	na	na	na	na	na	na	na	na	na	na	na	na	na	na	na
D11S	682	1049	312	240	276	155	213	498	175	285	405	588	181	270	222	316	232	233	307	153	527	833	462	301	339	358	319	268	679	484	na	na	na	na	na	na	na	na	na	na	na	na	na	na	na	na	na	na	na
D11T	623	1039	257	207	275	309	242	593	246	335	274	660	205	217	216	264	191	218	330	459	441	563	555	289	263	336	334	256	816	461	na	na	na	na	na	na	na	na	na	na	na	na	na	na	na	na	na	na	na
D11V	1739	1605	543	250	239	255	265	331	226	258	995	3	1470	444	288	408	356	219	212	615	4	1	731	358	442	440	253	179	588	411	na	na	na	na	na	na	na	na	na	na	na	na	na	na	na	na	na	na	na
D11W	1531	1942	551	343	361	285	145	244	101	229	782	1128	376	314	260	707	324	169	266	235	1264	2029	888	464	391	516	344	293	556	440	na	na	na	na	na	na	na	na	na	na	na	na	na	na	na	na	na	na	na
D11Y	407	499	294	68	20	49	17	93	9	22	130	1	103	119	100	136	43	28	64	40	316	377	240	82	78	130	50	33	83	79	na	na	na	na	na	na	na	na	na	na	na	na	na	na	na	na	na	na	na
D122*	na	na	na	na	na	na	na	na	na	na	na	na	na	na	na	na	na	na	na	na	na	na	na	na	na	na	na	na	na	na	164	25	9	10	7	2	2	6	5	na	225	80	22	22	34	8	10	22	na
D122A	na	na	na	na	na	na	na	na	na	na	na	na	na	na	na	na	na	na	na	na	na	na	na	na	na	na	na	na	na	na	374	374	89	93	58	84	63	49	41	12	946	636	318	174	117	105	72	48	44
D122C	na	na	na	na	na	na	na	na	na	na	na	na	na	na	na	na	na	na	na	na	na	na	na	na	na	na	na	na	na	na	149	287	34	29	20	20	16	3	8	na	356	249	125	45	68	72	26	35	25
D122E	na	na	na	na	na	na	na	na	na	na	na	na	na	na	na	na	na	na	na	na	na	na	na	na	na	na	na	na	na	na	552	524	207	218	176	113	118	134	95	52	3	1325	548	455	424	438	241	183	157
D122F	na	na	na	na	na	na	na	na	na	na	na	na	na	na	na	na	na	na	na	na	na	na	na	na	na	na	na	na	na	na	396	355	84	76	39	52	29	35	25	105	750	608	239	169	138	147	73	38	15
D122G	na	na	na	na	na	na	na	na	na	na	na	na	na	na	na	na	na	na	na	na	na	na	na	na	na	na	na	na	na	na	1844	1270	375	416	297	209	215	148	162	99	5	2808	1093	631	482	557	290	309	190
D122H	na	na	na	na	na	na	na	na	na	na	na	na	na	na	na	na	na	na	na	na	na	na	na	na	na	na	na	na	na	na	282	322	111	59	52	37	20	13	25	45	672	583	237	194	130	99	31	102	na
D122I	na	na	na	na	na	na	na	na	na	na	na	na	na	na	na	na	na	na	na	na	na	na	na	na	na	na	na	na	na	na	182	112	37	46	14	10	11	7	15	2	390	225	70	22	29	43	13	22	4
D122K	na	na	na	na	na	na	na	na	na	na	na	na	na	na	na	na	na	na	na	na	na	na	na	na	na	na	na	na	na	na	593	396	165	112	85	70	35	27	48	14	5	894	367	195	162	169	73	111	84
D122L	na	na	na	na	na	na	na	na	na	na	na	na	na	na	na	na	na	na	na	na	na	na	na	na	na	na	na	na	na	na	1212	750	277	222	156	94	123	53	85	39	3	1732	712	408	319	307	153	197	156
D122M	na	na	na	na	na	na	na	na	na	na	na	na	na	na	na	na	na	na	na	na	na	na	na	na	na	na	na	na	na	na	488	321	107	91	96	55	65	59	48	17	3	833	349	217	172	175	96	88	71
D122N	na	na	na	na	na	na	na	na	na	na	na	na	na	na	na	na	na	na	na	na	na	na	na	na	na	na	na	na	na	na	4	288	72	72	48	27	na	na	na	na	3	588	203	130	170	56	61	na	na
D122P	na	na	na	na	na	na	na	na	na	na	na	na	na	na	na	na	na	na	na	na	na	na	na	na	na	na	na	na	na	na	595	251	63	68	34	10	20	14	17	8	8	474	175	99	75	50	43	38	63
D122Q	na	na	na	na	na	na	na	na	na	na	na	na	na	na	na	na	na	na	na	na	na	na	na	na	na	na	na	na	na	na	327	353	96	139	71	53	75	54	59	38	14	835	354	277	250	225	133	158	91
D122R	na	na	na	na	na	na	na	na	na	na	na	na	na	na	na	na	na	na	na	na	na	na	na	na	na	na	na	na	na	na	1018	668	201	202	126	93	86	52	70	36	9	17	548	302	281	235	137	218	84
D122S	na	na	na	na	na	na	na	na	na	na	na	na	na	na	na	na	na	na	na	na	na	na	na	na	na	na	na	na	na	na	595	824	218	229	132	146	149	168	137	73	10	1550	712	476	596	641	348	380	282
D122T	na	na	na	na	na	na	na	na	na	na	na	na	na	na	na	na	na	na	na	na	na	na	na	na	na	na	na	na	na	na	428	503	179	229	156	118	119	166	124	74	4	1025	545	462	490	527	332	426	205
D122V	na	na	na	na	na	na	na	na	na	na	na	na	na	na	na	na	na	na	na	na	na	na	na	na	na	na	na	na	na	na	611	358	110	127	78	49	45	34	41	30	7	880	313	151	107	120	51	106	48
D122W	na	na	na	na	na	na	na	na	na	na	na	na	na	na	na	na	na	na	na	na	na	na	na	na	na	na	na	na	na	na	471	473	104	147	92	78	67	47	41	54	4	1084	405	272	284	231	172	153	76
D122Y	na	na	na	na	na	na	na	na	na	na	na	na	na	na	na	na	na	na	na	na	na	na	na	na	na	na	na	na	na	na	2	124	27	14	2	7	na	na	na	na	4	276	65	20	na	26	na	na	na
D127*	na	na	na	na	na	na	na	na	na	na	na	na	na	na	na	na	na	na	na	na	na	na	na	na	na	na	na	na	na	na	110	39	10	5	5	5	na	na	na	6	173	33	18	14	4	21	7	5	na
D127A	na	na	na	na	na	na	na	na	na	na	na	na	na	na	na	na	na	na	na	na	na	na	na	na	na	na	na	na	na	na	853	1036	450	551	412	467	826	734	792	938	3	2429	1053	1419	1835	1943	1992	2620	2158
D127C	na	na	na	na	na	na	na	na	na	na	na	na	na	na	na	na	na	na	na	na	na	na	na	na	na	na	na	na	na	na	125	138	46	63	70	47	69	103	105	133	241	292	132	196	179	245	228	327	253
D127E	na	na	na	na	na	na	na	na	na	na	na	na	na	na	na	na	na	na	na	na	na	na	na	na	na	na	na	na	na	na	1004	1041	305	472	419	349	583	634	709	825	2214	2548	983	1285	1458	1436	1459	2081	1656
D127F	na	na	na	na	na	na	na	na	na	na	na	na	na	na	na	na	na	na	na	na	na	na	na	na	na	na	na	na	na	na	242	315	133	143	168	129	180	246	224	282	8	669	319	351	482	527	482	867	638
D127G	na	na	na	na	na	na	na	na	na	na	na	na	na	na	na	na	na	na	na	na	na	na	na	na	na	na	na	na	na	na	3	2915	1131	1241	1201	1088	1815	2098	2245	2559	8	17	2756	3609	4509	4418	4433	6532	5539
D127H	na	na	na	na	na	na	na	na	na	na	na	na	na	na	na	na	na	na	na	na	na	na	na	na	na	na	na	na	na	na	721	997	313	431	393	351	611	792	814	810	5	1927	985	1275	1457	1560	1526	2250	2185
D127I	na	na	na	na	na	na	na	na	na	na	na	na	na	na	na	na	na	na	na	na	na	na	na	na	na	na	na	na	na	na	583	880	307	345	301	303	482	632	613	740	6	1565	715	1021	1120	1096	1214	1722	1576
D127K	na	na	na	na	na	na	na	na	na	na	na	na	na	na	na	na	na	na	na	na	na	na	na	na	na	na	na	na	na	na	1237	2200	783	892	882	775	1405	1929	1817	2112	4	4297	2006	2541	3337	3338	3342	5271	4519
D127L	na	na	na	na	na	na	na	na	na	na	na	na	na	na	na	na	na	na	na	na	na	na	na	na	na	na	na	na	na	na	1816	2428	1000	1011	1067	913	1497	1965	2021	2190	4009	5420	2375	3182	3739	3973	4011	5708	4948
D127M	na	na	na	na	na	na	na	na	na	na	na	na	na	na	na	na	na	na	na	na	na	na	na	na	na	na	na	na	na	na	707	994	459	461	387	336	620	906	852	971	1786	15	991	1299	1443	1510	1521	2398	1868
D127N	na	na	na	na	na	na	na	na	na	na	na	na	na	na	na	na	na	na	na	na	na	na	na	na	na	na	na	na	na	na	713	1086	324	379	404	367	508	591	591	685	1654	41	1009	1035	1266	1413	1221	1707	1387
D127P	na	na	na	na	na	na	na	na	na	na	na	na	na	na	na	na	na	na	na	na	na	na	na	na	na	na	na	na	na	na	1498	1942	663	788	777	696	1067	1150	1410	1514	4	4185	1859	2297	2839	2843	2756	4087	3380
D127Q	na	na	na	na	na	na	na	na	na	na	na	na	na	na	na	na	na	na	na	na	na	na	na	na	na	na	na	na	na	na	406	478	117	159	185	112	193	276	311	305	859	852	362	417	534	562	547	917	807
D127R	na	na	na	na	na	na	na	na	na	na	na	na	na	na	na	na	na	na	na	na	na	na	na	na	na	na	na	na	na	na	1134	1416	648	808	713	632	1207	1435	1593	1842	12	3204	1611	2171	2541	2823	2787	4565	4066
D127S	na	na	na	na	na	na	na	na	na	na	na	na	na	na	na	na	na	na	na	na	na	na	na	na	na	na	na	na	na	na	480	706	257	316	280	293	380	511	525	568	1196	1502	625	840	1003	1142	1062	1541	1287
D127T	na	na	na	na	na	na	na	na	na	na	na	na	na	na	na	na	na	na	na	na	na	na	na	na	na	na	na	na	na	na	971	2988	536	672	622	542	825	1302	1167	1199	2297	2943	1501	1924	2163	2770	2268	3497	2904
D127V	na	na	na	na	na	na	na	na	na	na	na	na	na	na	na	na	na	na	na	na	na	na	na	na	na	na	na	na	na	na	2004	2901	934	1118	1036	921	1487	1849	1877	2014	9	5470	2449	3491	3800	3750	3561	5723	5046
D127W	na	na	na	na	na	na	na	na	na	na	na	na	na	na	na	na	na	na	na	na	na	na	na	na	na	na	na	na	na	na	136	158	55	71	86	56	121	94	112	152	294	361	171	238	275	224	232	345	345
D127Y	na	na	na	na	na	na	na	na	na	na	na	na	na	na	na	na	na	na	na	na	na	na	na	na	na	na	na	na	na	na	214	372	87	114	106	101	185	167	261	293	468	5	249	355	447	388	498	643	654
D131*	na	na	na	na	na	na	na	na	na	na	na	na	na	na	na	na	na	na	na	na	na	na	na	na	na	na	na	na	na	na	102	32	1	5	na	5	4	3	3	5	143	42	13	9	8	7	5	na	na
D131A	na	na	na	na	na	na	na	na	na	na	na	na	na	na	na	na	na	na	na	na	na	na	na	na	na	na	na	na	na	na	352	272	76	83	64	61	104	63	87	59	985	737	289	345	275	264	243	276	183
D131C	na	na	na	na	na	na	na	na	na	na	na	na	na	na	na	na	na	na	na	na	na	na	na	na	na	na	na	na	na	na	8	5	2	5	3	1	2	2	na	7	41	36	4	8	7	8	9	7	5
D131E	na	na	na	na	na	na	na	na	na	na	na	na	na	na	na	na	na	na	na	na	na	na	na	na	na	na	na	na	na	na	2	234	159	140	93	99	149	111	114	85	1065	939	348	277	319	321	240	207	203
D131F	na	na	na	na	na	na	na	na	na	na	na	na	na	na	na	na	na	na	na	na	na	na	na	na	na	na	na	na	na	na	21	11	2	4	12	6	5	13	5	10	30	23	17	11	32	17	21	21	35
D131G	na	na	na	na	na	na	na	na	na	na	na	na	na	na	na	na	na	na	na	na	na	na	na	na	na	na	na	na	na	na	2	1855	616	667	528	433	521	547	567	415	11	12	1684	1630	1763	1700	1386	1544	1149
D131H	na	na	na	na	na	na	na	na	na	na	na	na	na	na	na	na	na	na	na	na	na	na	na	na	na	na	na	na	na	na	45	43	11	24	20	15	19	8	13	11	185	140	92	61	88	69	61	71	77
D131I	na	na	na	na	na	na	na	na	na	na	na	na	na	na	na	na	na	na	na	na	na	na	na	na	na	na	na	na	na	na	197	192	43	72	64	54	69	63	64	75	3	406	169	211	193	198	183	261	142
D131K	na	na	na	na	na	na	na	na	na	na	na	na	na	na	na	na	na	na	na	na	na	na	na	na	na	na	na	na	na	na	808	704	170	304	222	197	277	284	298	353	1901	1730	772	799	830	860	706	883	555
D131L	na	na	na	na	na	na	na	na	na	na	na	na	na	na	na	na	na	na	na	na	na	na	na	na	na	na	na	na	na	na	286	279	86	105	73	70	100	104	126	93	848	787	356	432	520	503	419	480	472
D131M	na	na	na	na	na	na	na	na	na	na	na	na	na	na	na	na	na	na	na	na	na	na	na	na	na	na	na	na	na	na	234	159	73	75	68	52	69	36	72	48	627	545	208	184	201	227	192	240	151
D131N	na	na	na	na	na	na	na	na	na	na	na	na	na	na	na	na	na	na	na	na	na	na	na	na	na	na	na	na	na	na	440	458	137	134	125	112	161	192	176	142	982	964	398	423	524	457	414	522	338
D131P	na	na	na	na	na	na	na	na	na	na	na	na	na	na	na	na	na	na	na	na	na	na	na	na	na	na	na	na	na	na	101	158	40	50	35	50	50	61	66	53	4	1669	707	820	1017	1009	900	1351	1000
D131Q	na	na	na	na	na	na	na	na	na	na	na	na	na	na	na	na	na	na	na	na	na	na	na	na	na	na	na	na	na	na	95	103	33	19	32	15	15	20	25	22	289	252	110	95	96	126	82	126	70
D131R	na	na	na	na	na	na	na	na	na	na	na	na	na	na	na	na	na	na	na	na	na	na	na	na	na	na	na	na	na	na	660	662	207	203	155	125	202	150	187	170	7	1547	630	534	616	558	443	434	396
D131S	na	na	na	na	na	na	na	na	na	na	na	na	na	na	na	na	na	na	na	na	na	na	na	na	na	na	na	na	na	na	222	176	42	42	42	31	23	44	58	35	3	386	123	152	145	120	113	153	95
D131T	na	na	na	na	na	na	na	na	na	na	na	na	na	na	na	na	na	na	na	na	na	na	na	na	na	na	na	na	na	na	550	665	143	172	134	115	168	186	177	111	1532	1207	515	552	594	522	483	579	390
D131V	na	na	na	na	na	na	na	na	na	na	na	na	na	na	na	na	na	na	na	na	na	na	na	na	na	na	na	na	na	na	606	637	100	199	169	106	143	175	196	154	3	1115	438	475	569	424	470	454	340
D131W	na	na	na	na	na	na	na	na	na	na	na	na	na	na	na	na	na	na	na	na	na	na	na	na	na	na	na	na	na	na	230	271	59	75	75	64	129	79	128	181	477	481	253	288	317	382	333	392	374
D131Y	na	na	na	na	na	na	na	na	na	na	na	na	na	na	na	na	na	na	na	na	na	na	na	na	na	na	na	na	na	na	33	69	30	17	19	16	20	16	28	39	3	13	45	54	62	82	66	66	85
D132*	na	na	na	na	na	na	na	na	na	na	na	na	na	na	na	na	na	na	na	na	na	na	na	na	na	na	na	na	na	na	129	18	3	3	5	4	6	na	2	na	134	46	16	18	na	20	5	6	8
D132A	na	na	na	na	na	na	na	na	na	na	na	na	na	na	na	na	na	na	na	na	na	na	na	na	na	na	na	na	na	na	431	345	167	197	155	149	218	252	250	238	986	1156	520	475	614	627	549	837	705
D132C	na	na	na	na	na	na	na	na	na	na	na	na	na	na	na	na	na	na	na	na	na	na	na	na	na	na	na	na	na	na	142	119	48	67	56	43	87	82	80	82	4	360	161	159	228	197	208	288	201
D132E	na	na	na	na	na	na	na	na	na	na	na	na	na	na	na	na	na	na	na	na	na	na	na	na	na	na	na	na	na	na	495	591	182	179	111	131	204	192	196	153	1103	1098	422	442	510	457	485	532	435
D132F	na	na	na	na	na	na	na	na	na	na	na	na	na	na	na	na	na	na	na	na	na	na	na	na	na	na	na	na	na	na	606	829	292	273	284	258	437	390	515	574	1440	1615	654	839	951	987	967	1255	1318
D132G	na	na	na	na	na	na	na	na	na	na	na	na	na	na	na	na	na	na	na	na	na	na	na	na	na	na	na	na	na	na	1161	1435	389	504	418	399	641	673	734	659	5	2903	1024	1319	1594	1597	1412	1985	1617
D132H	na	na	na	na	na	na	na	na	na	na	na	na	na	na	na	na	na	na	na	na	na	na	na	na	na	na	na	na	na	na	289	375	66	106	71	80	130	120	132	126	553	498	224	284	274	337	258	311	271
D132I	na	na	na	na	na	na	na	na	na	na	na	na	na	na	na	na	na	na	na	na	na	na	na	na	na	na	na	na	na	na	224	285	73	119	94	89	148	183	210	202	7	679	322	320	412	503	437	624	594
D132K	na	na	na	na	na	na	na	na	na	na	na	na	na	na	na	na	na	na	na	na	na	na	na	na	na	na	na	na	na	na	733	921	226	320	286	241	403	499	497	504	11	1799	694	836	1082	1078	1046	1669	1186
D132L	na	na	na	na	na	na	na	na	na	na	na	na	na	na	na	na	na	na	na	na	na	na	na	na	na	na	na	na	na	na	1515	1746	501	693	649	529	805	898	1057	964	3	3598	1490	1705	2055	2212	2050	2668	2533
D132M	na	na	na	na	na	na	na	na	na	na	na	na	na	na	na	na	na	na	na	na	na	na	na	na	na	na	na	na	na	na	454	612	200	200	159	139	294	295	328	265	1053	1120	505	586	681	642	572	775	645
D132N	na	na	na	na	na	na	na	na	na	na	na	na	na	na	na	na	na	na	na	na	na	na	na	na	na	na	na	na	na	na	305	375	117	114	121	109	132	212	192	223	704	769	245	301	447	354	322	628	500
D132P	na	na	na	na	na	na	na	na	na	na	na	na	na	na	na	na	na	na	na	na	na	na	na	na	na	na	na	na	na	na	621	818	282	376	296	320	470	604	596	591	1807	16	1151	1245	1527	1560	1560	2111	2002
D132Q	na	na	na	na	na	na	na	na	na	na	na	na	na	na	na	na	na	na	na	na	na	na	na	na	na	na	na	na	na	na	260	312	80	116	98	121	159	129	116	160	3	672	273	283	314	318	291	429	362
D132R	na	na	na	na	na	na	na	na	na	na	na	na	na	na	na	na	na	na	na	na	na	na	na	na	na	na	na	na	na	na	924	1490	350	442	400	373	579	678	766	792	11	2491	1061	1263	1706	1451	1522	2155	1876
D132S	na	na	na	na	na	na	na	na	na	na	na	na	na	na	na	na	na	na	na	na	na	na	na	na	na	na	na	na	na	na	722	1012	334	387	404	295	506	570	629	675	8	2303	895	1150	1440	1437	1477	2198	1769
D132T	na	na	na	na	na	na	na	na	na	na	na	na	na	na	na	na	na	na	na	na	na	na	na	na	na	na	na	na	na	na	366	599	170	241	201	215	350	399	450	420	4	19	815	960	1131	1267	1292	1907	1604
D132V	na	na	na	na	na	na	na	na	na	na	na	na	na	na	na	na	na	na	na	na	na	na	na	na	na	na	na	na	na	na	747	978	289	350	378	285	423	515	461	435	9	7	746	933	1079	1167	1122	1606	1376
D132W	na	na	na	na	na	na	na	na	na	na	na	na	na	na	na	na	na	na	na	na	na	na	na	na	na	na	na	na	na	na	297	357	96	105	103	99	149	139	174	123	702	768	260	316	369	380	347	451	362
D132Y	na	na	na	na	na	na	na	na	na	na	na	na	na	na	na	na	na	na	na	na	na	na	na	na	na	na	na	na	na	na	177	221	81	55	63	52	99	102	123	173	435	4	171	192	217	246	279	443	435
D142*	na	na	na	na	na	na	na	na	na	na	na	na	na	na	na	na	na	na	na	na	na	na	na	na	na	na	na	na	na	na	263	75	20	9	13	4	2	6	5	10	458	126	46	23	22	20	24	9	8
D142A	na	na	na	na	na	na	na	na	na	na	na	na	na	na	na	na	na	na	na	na	na	na	na	na	na	na	na	na	na	na	429	536	153	208	184	168	258	351	373	364	995	1092	399	523	582	595	604	968	599
D142C	na	na	na	na	na	na	na	na	na	na	na	na	na	na	na	na	na	na	na	na	na	na	na	na	na	na	na	na	na	na	39	82	37	24	26	25	49	35	35	37	147	149	54	83	57	97	96	110	115
D142E	na	na	na	na	na	na	na	na	na	na	na	na	na	na	na	na	na	na	na	na	na	na	na	na	na	na	na	na	na	na	941	1234	336	444	425	328	664	651	646	646	2490	3063	1018	1247	1414	1475	1337	1785	1428
D142F	na	na	na	na	na	na	na	na	na	na	na	na	na	na	na	na	na	na	na	na	na	na	na	na	na	na	na	na	na	na	997	1719	536	647	600	520	832	935	928	1241	5	3325	1344	1855	1973	2096	1941	2750	2269
D142G	na	na	na	na	na	na	na	na	na	na	na	na	na	na	na	na	na	na	na	na	na	na	na	na	na	na	na	na	na	na	1095	1718	450	559	553	436	678	799	854	846	7	4	1258	1523	1946	1806	1795	2593	2144
D142H	na	na	na	na	na	na	na	na	na	na	na	na	na	na	na	na	na	na	na	na	na	na	na	na	na	na	na	na	na	na	534	830	222	316	258	238	354	489	463	508	1250	1457	632	843	951	978	928	1386	924
D142I	na	na	na	na	na	na	na	na	na	na	na	na	na	na	na	na	na	na	na	na	na	na	na	na	na	na	na	na	na	na	266	415	112	135	128	120	179	162	234	429	654	861	318	395	487	405	449	608	574
D142K	na	na	na	na	na	na	na	na	na	na	na	na	na	na	na	na	na	na	na	na	na	na	na	na	na	na	na	na	na	na	982	1364	422	535	567	421	763	828	919	1033	2441	3121	1302	1575	1925	1981	1810	2725	2143
D142L	na	na	na	na	na	na	na	na	na	na	na	na	na	na	na	na	na	na	na	na	na	na	na	na	na	na	na	na	na	na	2627	4641	1385	1461	1431	1252	1978	2316	2508	2860	10	8379	3178	4091	5128	4993	4860	6621	5966
D142M	na	na	na	na	na	na	na	na	na	na	na	na	na	na	na	na	na	na	na	na	na	na	na	na	na	na	na	na	na	na	492	1494	267	293	232	195	310	363	391	428	3	1427	557	640	847	864	785	1151	829
D142N	na	na	na	na	na	na	na	na	na	na	na	na	na	na	na	na	na	na	na	na	na	na	na	na	na	na	na	na	na	na	454	560	175	196	178	157	297	284	298	290	1002	5	441	491	636	665	586	804	652
D142P	na	na	na	na	na	na	na	na	na	na	na	na	na	na	na	na	na	na	na	na	na	na	na	na	na	na	na	na	na	na	1385	2006	687	930	811	602	1054	1150	1406	1489	6	4478	1674	2275	2635	2728	2597	3871	3027
D142Q	na	na	na	na	na	na	na	na	na	na	na	na	na	na	na	na	na	na	na	na	na	na	na	na	na	na	na	na	na	na	567	877	261	245	280	224	357	441	446	419	1334	1508	662	841	938	1022	921	1231	957
D142R	na	na	na	na	na	na	na	na	na	na	na	na	na	na	na	na	na	na	na	na	na	na	na	na	na	na	na	na	na	na	1125	1303	572	656	556	465	871	923	917	952	2727	3602	1300	1664	1986	2158	2043	2714	2291
D142S	na	na	na	na	na	na	na	na	na	na	na	na	na	na	na	na	na	na	na	na	na	na	na	na	na	na	na	na	na	na	772	1067	333	349	360	313	497	552	575	595	1741	2115	946	1026	1220	1322	1236	1509	1431
D142T	na	na	na	na	na	na	na	na	na	na	na	na	na	na	na	na	na	na	na	na	na	na	na	na	na	na	na	na	na	na	550	730	275	341	250	227	399	433	397	448	1364	1837	689	799	902	841	924	1207	1024
D142V	na	na	na	na	na	na	na	na	na	na	na	na	na	na	na	na	na	na	na	na	na	na	na	na	na	na	na	na	na	na	934	1473	373	430	483	410	711	777	774	763	6	4	1052	1261	1482	1614	1507	2223	1843
D142W	na	na	na	na	na	na	na	na	na	na	na	na	na	na	na	na	na	na	na	na	na	na	na	na	na	na	na	na	na	na	697	1151	354	498	384	369	561	706	696	762	1832	2433	996	1233	1458	1591	1556	2108	1601
D142Y	na	na	na	na	na	na	na	na	na	na	na	na	na	na	na	na	na	na	na	na	na	na	na	na	na	na	na	na	na	na	265	426	103	182	134	134	210	242	219	249	688	897	330	428	488	483	432	576	460
D144*	na	na	na	na	na	na	na	na	na	na	na	na	na	na	na	na	na	na	na	na	na	na	na	na	na	na	na	na	na	na	110	23	7	2	2	na	7	7	2	3	222	51	14	20	35	5	6	na	11
D144A	na	na	na	na	na	na	na	na	na	na	na	na	na	na	na	na	na	na	na	na	na	na	na	na	na	na	na	na	na	na	196	204	73	64	62	45	74	82	79	71	454	559	178	207	191	193	165	228	189
D144C	na	na	na	na	na	na	na	na	na	na	na	na	na	na	na	na	na	na	na	na	na	na	na	na	na	na	na	na	na	na	121	132	29	35	25	31	43	59	54	55	266	328	116	114	123	104	142	118	89
D144E	na	na	na	na	na	na	na	na	na	na	na	na	na	na	na	na	na	na	na	na	na	na	na	na	na	na	na	na	na	na	217	238	60	57	72	68	43	65	65	35	679	575	142	181	199	359	154	184	152
D144F	na	na	na	na	na	na	na	na	na	na	na	na	na	na	na	na	na	na	na	na	na	na	na	na	na	na	na	na	na	na	408	375	91	109	95	81	94	85	128	68	763	788	280	316	295	302	240	398	288
D144G	na	na	na	na	na	na	na	na	na	na	na	na	na	na	na	na	na	na	na	na	na	na	na	na	na	na	na	na	na	na	710	644	228	237	219	210	385	395	416	360	3	5	600	769	824	879	856	1280	924
D144H	na	na	na	na	na	na	na	na	na	na	na	na	na	na	na	na	na	na	na	na	na	na	na	na	na	na	na	na	na	na	220	161	74	88	74	56	100	104	111	56	587	515	186	153	199	242	204	287	216
D144I	na	na	na	na	na	na	na	na	na	na	na	na	na	na	na	na	na	na	na	na	na	na	na	na	na	na	na	na	na	na	153	177	32	49	48	42	99	44	76	96	382	478	165	159	147	180	174	190	197
D144K	na	na	na	na	na	na	na	na	na	na	na	na	na	na	na	na	na	na	na	na	na	na	na	na	na	na	na	na	na	na	389	354	149	126	105	122	132	166	132	105	980	1006	339	318	441	430	317	406	306
D144L	na	na	na	na	na	na	na	na	na	na	na	na	na	na	na	na	na	na	na	na	na	na	na	na	na	na	na	na	na	na	1008	1281	356	364	329	254	366	400	406	351	2380	6	886	892	1033	992	836	1102	882
D144M	na	na	na	na	na	na	na	na	na	na	na	na	na	na	na	na	na	na	na	na	na	na	na	na	na	na	na	na	na	na	284	238	92	87	75	72	78	94	97	72	609	579	226	246	287	300	250	337	222
D144N	na	na	na	na	na	na	na	na	na	na	na	na	na	na	na	na	na	na	na	na	na	na	na	na	na	na	na	na	na	na	193	203	111	102	97	76	104	113	128	118	465	560	245	263	306	300	307	359	297
D144P	na	na	na	na	na	na	na	na	na	na	na	na	na	na	na	na	na	na	na	na	na	na	na	na	na	na	na	na	na	na	597	637	142	180	136	82	101	159	112	63	1306	1060	379	345	370	389	280	323	171
D144Q	na	na	na	na	na	na	na	na	na	na	na	na	na	na	na	na	na	na	na	na	na	na	na	na	na	na	na	na	na	na	247	310	52	87	75	60	66	80	83	94	669	618	210	253	236	182	230	235	166
D144R	na	na	na	na	na	na	na	na	na	na	na	na	na	na	na	na	na	na	na	na	na	na	na	na	na	na	na	na	na	na	716	448	169	204	152	129	203	172	159	117	1476	1311	419	465	514	528	472	469	344
D144S	na	na	na	na	na	na	na	na	na	na	na	na	na	na	na	na	na	na	na	na	na	na	na	na	na	na	na	na	na	na	504	691	157	199	156	149	241	211	284	237	8	37	378	494	662	776	522	728	562
D144T	na	na	na	na	na	na	na	na	na	na	na	na	na	na	na	na	na	na	na	na	na	na	na	na	na	na	na	na	na	na	380	414	119	88	104	88	119	108	121	143	828	704	250	283	289	283	276	364	226
D144V	na	na	na	na	na	na	na	na	na	na	na	na	na	na	na	na	na	na	na	na	na	na	na	na	na	na	na	na	na	na	382	344	128	152	119	113	150	169	166	143	975	973	363	388	488	417	334	498	332
D144W	na	na	na	na	na	na	na	na	na	na	na	na	na	na	na	na	na	na	na	na	na	na	na	na	na	na	na	na	na	na	302	315	89	120	93	76	94	177	145	106	781	723	222	241	361	268	306	322	260
D144Y	na	na	na	na	na	na	na	na	na	na	na	na	na	na	na	na	na	na	na	na	na	na	na	na	na	na	na	na	na	na	129	143	35	45	31	38	75	52	58	28	272	276	167	176	158	102	109	160	115
D27*	186	53	17	20	12	24	2	11	5	14	277	32	9	9	3	26	6	7	9	3	277	32	11	10	5	3	4	3	6	34	na	na	na	na	na	na	na	na	na	na	na	na	na	na	na	na	na	na	na
D27A	100	28	4	4	na	6	1	na	na	na	114	1	3	4	2	na	na	na	na	na	140	9	7	4	3	na	na	4	77	41	na	na	na	na	na	na	na	na	na	na	na	na	na	na	na	na	na	na	na
D27C	99	78	26	6	2	na	5	13	na	2	52	67	15	58	16	11	4	2	na	na	109	38	19	14	6	10	na	na	na	na	na	na	na	na	na	na	na	na	na	na	na	na	na	na	na	na	na	na	na
D27E	591	914	243	93	175	180	90	176	118	163	326	2	118	104	151	319	460	177	198	166	3	2	526	218	158	218	159	180	457	327	na	na	na	na	na	na	na	na	na	na	na	na	na	na	na	na	na	na	na
D27F	120	33	8	5	73	9	4	na	2	3	149	15	9	6	2	37	2	na	3	na	184	2	7	9	na	2	3	na	6	3	na	na	na	na	na	na	na	na	na	na	na	na	na	na	na	na	na	na	na
D27G	614	127	33	36	13	na	31	na	2	5	659	109	30	8	34	28	28	2	5	18	699	50	60	24	11	8	7	5	8	10	na	na	na	na	na	na	na	na	na	na	na	na	na	na	na	na	na	na	na
D27H	53	12	na	na	na	na	1	na	na	na	98	1	4	4	na	na	na	na	na	na	49	2	5	na	na	na	na	na	na	na	na	na	na	na	na	na	na	na	na	na	na	na	na	na	na	na	na	na	na
D27I	81	21	5	na	na	na	na	na	na	na	138	14	2	1	na	na	na	na	3	na	3	10	3	na	na	na	2	na	5	na	na	na	na	na	na	na	na	na	na	na	na	na	na	na	na	na	na	na	na
D27K	336	64	21	5	4	5	2	na	na	3	212	44	19	9	7	12	na	4	3	2	393	15	15	9	11	5	16	na	6	7	na	na	na	na	na	na	na	na	na	na	na	na	na	na	na	na	na	na	na
D27L	524	86	27	8	18	7	6	na	6	na	463	86	4	19	2	na	2	na	9	7	504	61	20	7	8	11	2	na	5	8	na	na	na	na	na	na	na	na	na	na	na	na	na	na	na	na	na	na	na
D27M	202	47	5	6	6	na	na	na	7	3	123	31	7	16	na	na	2	na	na	na	238	26	13	6	2	na	na	na	6	na	na	na	na	na	na	na	na	na	na	na	na	na	na	na	na	na	na	na	na
D27N	148	34	9	7	na	10	2	2	na	10	251	42	3	9	7	2	4	na	5	4	135	2	14	3	4	2	2	5	na	5	na	na	na	na	na	na	na	na	na	na	na	na	na	na	na	na	na	na	na
D27P	84	11	2	na	6	na	6	na	na	na	81	20	na	1	na	na	na	3	na	4	70	5	8	na	na	2	na	na	na	na	na	na	na	na	na	na	na	na	na	na	na	na	na	na	na	na	na	na	na
D27Q	122	27	4	6	6	na	5	na	na	na	103	17	3	12	na	na	na	2	na	11	147	56	7	3	4	na	na	na	8	na	na	na	na	na	na	na	na	na	na	na	na	na	na	na	na	na	na	na	na
D27R	395	111	39	13	7	4	na	27	na	26	372	102	17	7	4	na	9	6	10	34	565	175	21	24	6	9	23	13	6	5	na	na	na	na	na	na	na	na	na	na	na	na	na	na	na	na	na	na	na
D27S	272	45	13	18	7	3	4	4	2	9	182	48	14	15	57	29	3	na	3	9	1	39	9	4	2	6	2	na	na	5	na	na	na	na	na	na	na	na	na	na	na	na	na	na	na	na	na	na	na
D27T	163	34	16	3	na	na	4	8	na	na	106	29	2	2	2	na	na	na	na	na	140	16	4	na	na	2	6	3	na	na	na	na	na	na	na	na	na	na	na	na	na	na	na	na	na	na	na	na	na
D27V	278	63	26	13	7	na	2	na	na	12	237	1	28	2	6	na	5	2	8	14	2	79	12	4	4	11	5	10	10	na	na	na	na	na	na	na	na	na	na	na	na	na	na	na	na	na	na	na	na
D27W	303	38	9	10	20	2	1	10	3	15	269	52	13	8	5	na	na	30	5	2	306	31	24	8	4	8	8	3	6	7	na	na	na	na	na	na	na	na	na	na	na	na	na	na	na	na	na	na	na
D27Y	78	13	7	na	2	na	1	na	na	3	46	2	20	4	na	na	2	na	na	na	130	3	19	na	na	2	na	na	na	na	na	na	na	na	na	na	na	na	na	na	na	na	na	na	na	na	na	na	na
D69*	76	7	5	na	5	3	1	na	na	na	194	15	13	7	3	na	na	3	na	5	na	na	na	na	na	na	na	na	na	na	72	21	3	5	4	1	4	na	2	na	na	na	na	na	na	na	na	na	na
D69A	4	659	382	216	219	513	159	372	211	369	435	355	190	688	188	648	257	203	271	209	na	na	na	na	na	na	na	na	na	na	517	741	124	159	142	124	145	197	221	199	na	na	na	na	na	na	na	na	na
D69C	81	122	39	34	31	56	25	200	27	42	64	79	18	15	27	67	43	38	55	57	na	na	na	na	na	na	na	na	na	na	94	124	30	24	24	26	12	54	32	34	na	na	na	na	na	na	na	na	na
D69E	637	2	647	294	337	348	189	478	270	460	536	421	195	277	172	212	280	129	282	459	na	na	na	na	na	na	na	na	na	na	702	979	198	209	162	162	241	335	253	298	na	na	na	na	na	na	na	na	na
D69F	2	246	130	73	120	44	80	372	47	107	118	170	24	53	53	177	87	82	101	121	na	na	na	na	na	na	na	na	na	na	173	191	60	63	49	58	79	82	85	70	na	na	na	na	na	na	na	na	na
D69G	6	4	889	593	746	653	726	1512	597	1214	892	1013	299	350	396	547	707	1460	824	910	na	na	na	na	na	na	na	na	na	na	1543	2006	432	510	450	388	617	660	671	735	na	na	na	na	na	na	na	na	na
D69H	732	1044	473	375	336	406	308	509	389	380	428	604	188	781	213	691	357	262	430	448	na	na	na	na	na	na	na	na	na	na	631	908	195	231	187	174	286	239	262	256	na	na	na	na	na	na	na	na	na
D69I	296	438	161	172	99	139	100	259	200	126	259	220	118	60	90	102	115	93	139	189	na	na	na	na	na	na	na	na	na	na	245	309	59	90	84	64	97	78	90	82	na	na	na	na	na	na	na	na	na
D69K	819	1075	599	322	410	386	321	558	291	430	535	675	244	282	242	1109	348	335	381	445	na	na	na	na	na	na	na	na	na	na	936	1089	223	335	236	214	263	327	304	313	na	na	na	na	na	na	na	na	na
D69L	987	1459	576	459	384	426	372	705	357	826	506	835	292	321	334	472	421	380	531	597	na	na	na	na	na	na	na	na	na	na	1086	1447	325	369	305	273	302	330	423	377	na	na	na	na	na	na	na	na	na
D69M	328	449	168	116	132	101	123	88	123	169	229	289	60	56	117	59	177	98	146	118	na	na	na	na	na	na	na	na	na	na	314	394	88	116	100	74	107	113	128	79	na	na	na	na	na	na	na	na	na
D69N	1065	8	493	349	439	452	278	1000	413	425	3	712	193	499	324	353	294	366	442	419	na	na	na	na	na	na	na	na	na	na	742	1014	170	199	176	139	227	245	229	229	na	na	na	na	na	na	na	na	na
D69P	1836	2505	1452	749	1053	747	906	1711	917	1440	1081	1430	390	612	620	682	880	719	1227	1659	na	na	na	na	na	na	na	na	na	na	1792	2494	612	656	616	511	823	758	854	913	na	na	na	na	na	na	na	na	na
D69Q	3	519	241	165	100	162	164	66	96	259	128	242	82	69	114	403	159	133	153	148	na	na	na	na	na	na	na	na	na	na	313	534	121	115	118	105	114	122	147	120	na	na	na	na	na	na	na	na	na
D69R	788	1099	514	290	414	385	294	420	237	404	441	526	279	280	202	327	343	329	348	525	na	na	na	na	na	na	na	na	na	na	881	1099	230	278	227	220	297	410	339	460	na	na	na	na	na	na	na	na	na
D69S	521	569	626	251	362	173	256	470	242	454	383	351	108	144	149	193	220	175	263	353	na	na	na	na	na	na	na	na	na	na	454	663	158	153	129	142	226	219	221	209	na	na	na	na	na	na	na	na	na
D69T	757	1118	444	425	390	254	276	401	308	482	526	663	241	631	232	622	514	274	415	457	na	na	na	na	na	na	na	na	na	na	626	903	203	261	212	201	229	295	269	257	na	na	na	na	na	na	na	na	na
D69V	937	2	455	337	315	463	335	590	363	691	1	653	314	185	305	1325	563	343	424	462	na	na	na	na	na	na	na	na	na	na	1051	2	246	308	311	230	303	340	351	366	na	na	na	na	na	na	na	na	na
D69W	341	522	170	110	109	116	142	203	154	244	120	217	58	73	76	91	106	109	156	107	na	na	na	na	na	na	na	na	na	na	277	343	70	96	72	70	114	111	148	114	na	na	na	na	na	na	na	na	na
D69Y	2	334	88	63	86	97	75	174	77	119	56	202	13	35	35	52	117	47	91	30	na	na	na	na	na	na	na	na	na	na	210	189	24	56	30	25	45	59	42	28	na	na	na	na	na	na	na	na	na
D70*	133	11	7	na	na	16	na	na	na	3	192	22	7	5	8	6	2	na	4	na	na	na	na	na	na	na	na	na	na	na	111	31	6	7	na	2	4	4	na	4	na	na	na	na	na	na	na	na	na
D70A	306	387	222	184	109	96	171	373	104	201	362	272	94	175	145	239	352	185	184	179	na	na	na	na	na	na	na	na	na	na	353	498	125	125	133	94	154	148	134	133	na	na	na	na	na	na	na	na	na
D70C	162	224	71	69	103	80	71	190	72	138	104	106	29	101	52	30	162	58	93	68	na	na	na	na	na	na	na	na	na	na	216	217	53	64	75	68	72	89	84	96	na	na	na	na	na	na	na	na	na
D70E	2	914	421	233	288	230	263	383	225	409	4	498	161	127	347	292	616	248	318	627	na	na	na	na	na	na	na	na	na	na	629	840	201	215	164	151	211	194	258	258	na	na	na	na	na	na	na	na	na
D70F	450	487	225	215	178	136	193	206	179	241	213	248	776	66	117	371	193	156	238	285	na	na	na	na	na	na	na	na	na	na	404	516	108	143	109	110	139	205	174	155	na	na	na	na	na	na	na	na	na
D70G	1441	2	875	590	536	723	478	1082	579	688	1	1054	605	567	536	977	648	534	766	856	na	na	na	na	na	na	na	na	na	na	1526	1888	403	529	413	404	559	586	567	592	na	na	na	na	na	na	na	na	na
D70H	411	568	333	161	249	278	173	367	242	240	200	221	150	136	192	214	165	198	210	408	na	na	na	na	na	na	na	na	na	na	424	576	109	160	151	130	226	241	219	254	na	na	na	na	na	na	na	na	na
D70I	278	544	178	146	136	144	205	226	122	230	37	241	186	76	134	150	238	351	208	245	na	na	na	na	na	na	na	na	na	na	309	526	125	141	119	109	165	119	160	152	na	na	na	na	na	na	na	na	na
D70K	688	966	458	349	475	325	335	796	334	636	490	535	280	220	285	440	391	530	384	430	na	na	na	na	na	na	na	na	na	na	722	1006	279	286	264	210	341	348	370	350	na	na	na	na	na	na	na	na	na
D70L	1794	2	1182	827	1021	1011	971	1515	866	1420	9	1302	726	636	1176	843	793	807	1233	1385	na	na	na	na	na	na	na	na	na	na	2038	2463	554	696	592	542	780	877	1075	837	na	na	na	na	na	na	na	na	na
D70M	625	926	314	299	366	278	348	596	279	450	368	407	142	260	181	513	274	987	342	794	na	na	na	na	na	na	na	na	na	na	605	794	178	259	157	183	270	321	328	293	na	na	na	na	na	na	na	na	na
D70N	2	716	516	247	334	283	207	457	202	367	576	385	154	209	185	771	228	185	331	432	na	na	na	na	na	na	na	na	na	na	563	2	186	210	176	167	217	199	220	196	na	na	na	na	na	na	na	na	na
D70P	699	1269	648	344	652	447	411	878	458	656	562	586	142	258	396	611	404	658	629	758	na	na	na	na	na	na	na	na	na	na	958	1097	326	368	306	257	440	405	515	502	na	na	na	na	na	na	na	na	na
D70Q	2	595	241	220	225	164	248	504	206	365	265	309	124	240	166	239	231	277	332	364	na	na	na	na	na	na	na	na	na	na	473	561	116	162	160	144	256	218	232	195	na	na	na	na	na	na	na	na	na
D70R	7	1771	670	545	625	393	511	1257	473	879	845	837	391	391	416	664	500	709	685	667	na	na	na	na	na	na	na	na	na	na	1277	1574	415	480	410	381	523	693	667	502	na	na	na	na	na	na	na	na	na
D70S	754	1194	506	377	363	201	347	614	256	457	525	495	195	453	251	418	324	247	426	410	na	na	na	na	na	na	na	na	na	na	737	1018	204	282	233	225	321	326	338	345	na	na	na	na	na	na	na	na	na
D70T	425	650	237	222	292	236	206	493	255	267	337	353	144	162	213	336	270	204	376	428	na	na	na	na	na	na	na	na	na	na	480	775	176	214	199	150	222	255	274	300	na	na	na	na	na	na	na	na	na
D70V	3	985	406	278	366	297	308	441	243	456	1	454	238	276	226	290	244	317	339	379	na	na	na	na	na	na	na	na	na	na	735	956	205	245	248	229	259	250	312	276	na	na	na	na	na	na	na	na	na
D70W	689	1021	350	318	314	305	240	425	209	459	583	493	203	389	212	324	240	223	295	213	na	na	na	na	na	na	na	na	na	na	616	969	192	238	208	165	239	236	293	302	na	na	na	na	na	na	na	na	na
D70Y	2	3	168	120	130	119	114	213	86	197	1	153	86	84	105	198	110	87	187	133	na	na	na	na	na	na	na	na	na	na	247	340	64	108	102	65	88	132	130	84	na	na	na	na	na	na	na	na	na
D79*	60	18	8	na	8	na	1	na	na	na	121	13	6	2	4	3	4	na	na	na	na	na	na	na	na	na	na	na	na	na	80	29	9	na	2	5	3	2	3	na	na	na	na	na	na	na	na	na	na
D79A	483	620	216	197	277	177	159	284	186	186	356	359	145	156	139	112	146	99	151	235	na	na	na	na	na	na	na	na	na	na	523	610	160	185	146	127	152	186	190	173	na	na	na	na	na	na	na	na	na
D79C	3	237	82	70	94	85	19	28	73	73	132	151	97	37	50	24	112	52	63	100	na	na	na	na	na	na	na	na	na	na	146	230	88	70	47	33	55	50	48	36	na	na	na	na	na	na	na	na	na
D79E	455	591	230	194	219	128	211	266	98	300	2	357	134	123	154	370	161	129	221	113	na	na	na	na	na	na	na	na	na	na	507	611	130	149	152	103	128	134	199	135	na	na	na	na	na	na	na	na	na
D79F	1009	1030	369	275	249	267	221	325	136	300	479	493	177	327	186	470	265	270	353	505	na	na	na	na	na	na	na	na	na	na	679	665	216	193	174	161	210	185	225	221	na	na	na	na	na	na	na	na	na
D79G	924	1077	360	238	234	265	303	250	207	313	4	544	245	438	256	297	246	273	332	351	na	na	na	na	na	na	na	na	na	na	744	1063	212	243	248	179	294	280	258	264	na	na	na	na	na	na	na	na	na
D79H	350	463	256	260	208	212	153	423	155	241	126	282	91	197	96	122	170	94	157	147	na	na	na	na	na	na	na	na	na	na	348	569	81	118	95	99	120	121	143	185	na	na	na	na	na	na	na	na	na
D79I	320	330	132	121	84	206	99	378	76	130	138	188	58	52	109	72	79	149	105	118	na	na	na	na	na	na	na	na	na	na	207	430	68	98	63	67	66	92	89	97	na	na	na	na	na	na	na	na	na
D79K	1050	1569	574	363	580	389	322	342	206	363	438	801	366	343	382	578	550	548	373	448	na	na	na	na	na	na	na	na	na	na	952	1200	261	304	383	228	330	319	331	308	na	na	na	na	na	na	na	na	na
D79L	1294	1831	758	648	807	539	515	974	387	585	1085	1059	1961	400	403	746	534	493	583	737	na	na	na	na	na	na	na	na	na	na	1283	1570	421	465	378	301	417	382	495	419	na	na	na	na	na	na	na	na	na
D79M	325	617	172	104	94	77	97	155	85	149	357	263	96	74	113	113	125	56	150	209	na	na	na	na	na	na	na	na	na	na	314	421	135	79	103	83	99	115	113	187	na	na	na	na	na	na	na	na	na
D79N	795	1158	381	290	430	401	302	680	451	373	341	449	246	192	216	300	375	719	424	540	na	na	na	na	na	na	na	na	na	na	648	836	191	247	240	191	291	270	284	276	na	na	na	na	na	na	na	na	na
D79P	2036	2	1187	1072	898	1053	690	1077	672	1012	1037	1221	674	804	590	1169	760	727	921	1078	na	na	na	na	na	na	na	na	na	na	1749	2366	449	664	577	491	640	739	855	707	na	na	na	na	na	na	na	na	na
D79Q	374	4	228	126	145	69	111	209	92	219	373	251	95	165	132	412	158	97	121	173	na	na	na	na	na	na	na	na	na	na	318	431	102	102	97	76	100	106	109	107	na	na	na	na	na	na	na	na	na
D79R	1023	1462	709	345	528	446	403	428	316	525	827	761	316	320	334	437	450	340	458	410	na	na	na	na	na	na	na	na	na	na	924	1315	284	397	287	281	371	379	364	354	na	na	na	na	na	na	na	na	na
D79S	1384	1678	644	486	576	444	449	618	471	692	732	810	522	820	771	715	458	470	580	757	na	na	na	na	na	na	na	na	na	na	1057	1388	341	472	389	303	480	458	456	447	na	na	na	na	na	na	na	na	na
D79T	1074	1184	545	375	643	351	379	740	416	656	484	697	240	222	297	350	491	383	494	654	na	na	na	na	na	na	na	na	na	na	748	948	332	379	242	216	350	363	393	429	na	na	na	na	na	na	na	na	na
D79V	518	757	463	240	314	238	244	398	242	261	1	437	270	285	226	189	389	282	281	323	na	na	na	na	na	na	na	na	na	na	556	830	176	164	176	148	271	252	216	174	na	na	na	na	na	na	na	na	na
D79W	712	861	380	197	319	203	210	275	187	247	792	468	192	151	231	258	187	769	297	351	na	na	na	na	na	na	na	na	na	na	579	735	160	172	180	157	201	225	222	142	na	na	na	na	na	na	na	na	na
D79Y	374	2	156	166	175	120	144	135	85	155	2	192	73	718	81	233	132	97	159	112	na	na	na	na	na	na	na	na	na	na	270	396	96	112	105	93	107	96	136	92	na	na	na	na	na	na	na	na	na
D87*	na	na	na	na	na	na	na	na	na	na	na	na	na	na	na	na	na	na	na	na	75	11	3	2	3	2	5	4	na	na	na	na	na	na	na	na	na	na	na	na	252	14	15	13	12	6	na	na	6
D87A	na	na	na	na	na	na	na	na	na	na	na	na	na	na	na	na	na	na	na	na	243	335	589	191	172	251	230	313	668	312	na	na	na	na	na	na	na	na	na	na	967	1207	308	413	481	864	413	601	505
D87C	na	na	na	na	na	na	na	na	na	na	na	na	na	na	na	na	na	na	na	na	226	265	195	123	134	169	130	109	239	153	na	na	na	na	na	na	na	na	na	na	553	533	209	221	260	214	142	307	193
D87E	na	na	na	na	na	na	na	na	na	na	na	na	na	na	na	na	na	na	na	na	414	493	440	321	248	330	278	384	784	541	na	na	na	na	na	na	na	na	na	na	1167	1395	423	493	615	551	578	721	544
D87F	na	na	na	na	na	na	na	na	na	na	na	na	na	na	na	na	na	na	na	na	905	933	1021	558	633	787	795	851	2063	1282	na	na	na	na	na	na	na	na	na	na	2527	2371	931	1178	1326	1475	1432	2151	1688
D87G	na	na	na	na	na	na	na	na	na	na	na	na	na	na	na	na	na	na	na	na	636	833	727	435	478	501	540	516	1254	959	na	na	na	na	na	na	na	na	na	na	2156	2283	818	981	1094	1156	1036	1811	1117
D87H	na	na	na	na	na	na	na	na	na	na	na	na	na	na	na	na	na	na	na	na	366	820	471	240	287	280	292	391	792	599	na	na	na	na	na	na	na	na	na	na	1134	2321	446	418	654	698	593	761	671
D87I	na	na	na	na	na	na	na	na	na	na	na	na	na	na	na	na	na	na	na	na	241	290	223	212	200	157	168	145	666	383	na	na	na	na	na	na	na	na	na	na	777	792	296	242	338	341	351	552	422
D87K	na	na	na	na	na	na	na	na	na	na	na	na	na	na	na	na	na	na	na	na	829	902	929	510	575	678	691	728	1507	1092	na	na	na	na	na	na	na	na	na	na	2292	2656	915	1009	1348	1278	1192	1845	1346
D87L	na	na	na	na	na	na	na	na	na	na	na	na	na	na	na	na	na	na	na	na	1413	1758	1829	1069	980	1236	1265	1238	2843	1949	na	na	na	na	na	na	na	na	na	na	4640	4972	1822	1978	2405	2607	2324	3384	2478
D87M	na	na	na	na	na	na	na	na	na	na	na	na	na	na	na	na	na	na	na	na	323	319	374	196	251	257	271	261	678	490	na	na	na	na	na	na	na	na	na	na	971	1197	382	401	594	563	591	768	580
D87N	na	na	na	na	na	na	na	na	na	na	na	na	na	na	na	na	na	na	na	na	433	408	360	218	198	265	301	280	620	505	na	na	na	na	na	na	na	na	na	na	1014	1004	286	355	440	466	466	634	419
D87P	na	na	na	na	na	na	na	na	na	na	na	na	na	na	na	na	na	na	na	na	1247	1413	1365	781	953	1258	1247	1064	3290	1856	na	na	na	na	na	na	na	na	na	na	3439	3702	1426	1566	1917	2264	1906	2975	2457
D87Q	na	na	na	na	na	na	na	na	na	na	na	na	na	na	na	na	na	na	na	na	296	412	394	171	182	229	250	262	606	455	na	na	na	na	na	na	na	na	na	na	902	1038	401	448	526	1021	516	733	493
D87R	na	na	na	na	na	na	na	na	na	na	na	na	na	na	na	na	na	na	na	na	1156	1309	1639	669	732	786	846	871	1882	1358	na	na	na	na	na	na	na	na	na	na	3464	4247	1367	1439	1716	2015	1576	2336	1793
D87S	na	na	na	na	na	na	na	na	na	na	na	na	na	na	na	na	na	na	na	na	707	834	845	487	515	674	625	663	1651	954	na	na	na	na	na	na	na	na	na	na	2247	2155	865	945	1255	1191	1180	1549	1298
D87T	na	na	na	na	na	na	na	na	na	na	na	na	na	na	na	na	na	na	na	na	586	680	570	311	357	489	549	498	1114	750	na	na	na	na	na	na	na	na	na	na	1503	1234	618	712	817	823	797	1200	848
D87V	na	na	na	na	na	na	na	na	na	na	na	na	na	na	na	na	na	na	na	na	515	496	467	259	285	387	292	310	753	502	na	na	na	na	na	na	na	na	na	na	1719	1739	591	688	785	639	664	772	635
D87W	na	na	na	na	na	na	na	na	na	na	na	na	na	na	na	na	na	na	na	na	254	265	387	233	203	220	243	272	566	361	na	na	na	na	na	na	na	na	na	na	1062	1284	342	478	518	539	539	804	585
D87Y	na	na	na	na	na	na	na	na	na	na	na	na	na	na	na	na	na	na	na	na	141	293	389	111	126	141	197	214	375	327	na	na	na	na	na	na	na	na	na	na	633	352	174	234	245	216	214	284	238
E101*	na	na	na	na	na	na	na	na	na	na	na	na	na	na	na	na	na	na	na	na	213	19	4	10	na	na	na	na	na	3	na	na	na	na	na	na	na	na	na	na	327	97	22	18	11	13	12	8	9
E101A	na	na	na	na	na	na	na	na	na	na	na	na	na	na	na	na	na	na	na	na	752	963	858	452	551	604	592	483	1437	954	na	na	na	na	na	na	na	na	na	na	2129	2254	945	1002	1213	1154	1107	1518	1223
E101C	na	na	na	na	na	na	na	na	na	na	na	na	na	na	na	na	na	na	na	na	278	407	318	177	194	258	259	199	573	366	na	na	na	na	na	na	na	na	na	na	938	765	336	433	543	451	451	664	463
E101D	na	na	na	na	na	na	na	na	na	na	na	na	na	na	na	na	na	na	na	na	286	423	344	232	235	266	243	218	507	301	na	na	na	na	na	na	na	na	na	na	1036	817	381	363	434	379	347	424	369
E101F	na	na	na	na	na	na	na	na	na	na	na	na	na	na	na	na	na	na	na	na	698	864	743	479	652	624	609	559	1449	887	na	na	na	na	na	na	na	na	na	na	2066	1939	847	970	1175	1188	997	1346	1287
E101G	na	na	na	na	na	na	na	na	na	na	na	na	na	na	na	na	na	na	na	na	1611	2210	2294	1185	1398	1592	1550	1732	4382	2879	na	na	na	na	na	na	na	na	na	na	5715	6746	2415	3083	3783	3969	3624	5132	4565
E101H	na	na	na	na	na	na	na	na	na	na	na	na	na	na	na	na	na	na	na	na	415	567	435	279	331	316	289	347	762	514	na	na	na	na	na	na	na	na	na	na	1023	1222	401	513	553	695	593	874	652
E101I	na	na	na	na	na	na	na	na	na	na	na	na	na	na	na	na	na	na	na	na	349	432	384	207	529	255	272	201	491	366	na	na	na	na	na	na	na	na	na	na	1147	1144	424	461	548	530	488	703	487
E101K	na	na	na	na	na	na	na	na	na	na	na	na	na	na	na	na	na	na	na	na	585	789	889	430	587	598	506	489	1155	985	na	na	na	na	na	na	na	na	na	na	2016	2024	759	948	1174	1339	1089	1676	1192
E101L	na	na	na	na	na	na	na	na	na	na	na	na	na	na	na	na	na	na	na	na	1853	2601	2292	1185	1725	1503	1665	1587	3566	2397	na	na	na	na	na	na	na	na	na	na	6170	5909	2443	2870	3589	4066	3234	4366	3431
E101M	na	na	na	na	na	na	na	na	na	na	na	na	na	na	na	na	na	na	na	na	401	535	565	283	282	340	385	265	950	518	na	na	na	na	na	na	na	na	na	na	1359	1252	495	554	738	724	709	1003	762
E101N	na	na	na	na	na	na	na	na	na	na	na	na	na	na	na	na	na	na	na	na	455	579	832	296	306	396	438	314	858	582	na	na	na	na	na	na	na	na	na	na	1452	1727	616	631	815	810	687	965	703
E101P	na	na	na	na	na	na	na	na	na	na	na	na	na	na	na	na	na	na	na	na	2246	1670	1330	607	576	561	279	460	342	396	na	na	na	na	na	na	na	na	na	na	6621	4881	1501	1064	1046	935	521	453	266
E101Q	na	na	na	na	na	na	na	na	na	na	na	na	na	na	na	na	na	na	na	na	258	375	397	203	228	255	304	233	659	647	na	na	na	na	na	na	na	na	na	na	1080	1084	396	535	612	644	583	741	589
E101R	na	na	na	na	na	na	na	na	na	na	na	na	na	na	na	na	na	na	na	na	1089	1615	1557	791	956	1026	1000	1038	2530	1711	na	na	na	na	na	na	na	na	na	na	3861	4249	1767	2083	2379	2657	2442	3148	2584
E101S	na	na	na	na	na	na	na	na	na	na	na	na	na	na	na	na	na	na	na	na	1119	1197	1432	659	856	932	816	913	1924	1302	na	na	na	na	na	na	na	na	na	na	3725	4009	1512	1714	2056	2107	1822	2726	1901
E101T	na	na	na	na	na	na	na	na	na	na	na	na	na	na	na	na	na	na	na	na	764	738	764	433	515	565	527	489	1066	716	na	na	na	na	na	na	na	na	na	na	2061	2665	837	1034	1138	1112	1084	1445	1014
E101V	na	na	na	na	na	na	na	na	na	na	na	na	na	na	na	na	na	na	na	na	954	1126	1098	564	672	796	640	694	1574	939	na	na	na	na	na	na	na	na	na	na	2885	3165	1111	1260	1561	1471	1393	1949	1518
E101W	na	na	na	na	na	na	na	na	na	na	na	na	na	na	na	na	na	na	na	na	503	742	844	422	425	490	570	462	1539	855	na	na	na	na	na	na	na	na	na	na	2041	2592	747	988	1227	1163	1172	1653	1367
E101Y	na	na	na	na	na	na	na	na	na	na	na	na	na	na	na	na	na	na	na	na	369	306	406	246	207	263	310	255	646	399	na	na	na	na	na	na	na	na	na	na	843	1197	385	449	566	558	557	674	522
E118*	na	na	na	na	na	na	na	na	na	na	na	na	na	na	na	na	na	na	na	na	80	3	na	na	na	3	2	2	na	3	na	na	na	na	na	na	na	na	na	na	93	48	8	4	na	na	na	na	na
E118A	na	na	na	na	na	na	na	na	na	na	na	na	na	na	na	na	na	na	na	na	204	316	364	205	242	291	334	343	928	576	na	na	na	na	na	na	na	na	na	na	729	1120	423	704	735	746	793	1300	1044
E118C	na	na	na	na	na	na	na	na	na	na	na	na	na	na	na	na	na	na	na	na	2	19	21	7	10	12	9	13	27	22	na	na	na	na	na	na	na	na	na	na	37	50	21	14	30	34	32	38	44
E118D	na	na	na	na	na	na	na	na	na	na	na	na	na	na	na	na	na	na	na	na	81	44	80	27	40	45	33	27	65	59	na	na	na	na	na	na	na	na	na	na	178	103	49	67	86	54	84	92	72
E118F	na	na	na	na	na	na	na	na	na	na	na	na	na	na	na	na	na	na	na	na	36	65	34	26	43	36	39	119	140	79	na	na	na	na	na	na	na	na	na	na	97	88	74	82	107	114	128	173	148
E118G	na	na	na	na	na	na	na	na	na	na	na	na	na	na	na	na	na	na	na	na	510	803	852	415	502	570	642	747	1904	1252	na	na	na	na	na	na	na	na	na	na	1738	2096	1010	1541	1879	1836	1829	3017	2349
E118H	na	na	na	na	na	na	na	na	na	na	na	na	na	na	na	na	na	na	na	na	45	44	41	29	23	51	95	37	189	101	na	na	na	na	na	na	na	na	na	na	117	41	73	97	90	150	130	207	186
E118I	na	na	na	na	na	na	na	na	na	na	na	na	na	na	na	na	na	na	na	na	152	270	209	126	143	200	209	130	516	312	na	na	na	na	na	na	na	na	na	na	467	548	281	353	416	432	402	620	482
E118K	na	na	na	na	na	na	na	na	na	na	na	na	na	na	na	na	na	na	na	na	477	902	1164	551	688	817	896	937	2799	1753	na	na	na	na	na	na	na	na	na	na	1626	2873	1170	1711	2172	2520	2189	3367	2937
E118L	na	na	na	na	na	na	na	na	na	na	na	na	na	na	na	na	na	na	na	na	340	411	654	277	324	359	369	397	1117	689	na	na	na	na	na	na	na	na	na	na	825	1185	599	779	910	995	975	1456	1344
E118M	na	na	na	na	na	na	na	na	na	na	na	na	na	na	na	na	na	na	na	na	358	504	511	322	306	381	391	471	1097	691	na	na	na	na	na	na	na	na	na	na	960	1101	647	807	973	1120	971	1272	1183
E118N	na	na	na	na	na	na	na	na	na	na	na	na	na	na	na	na	na	na	na	na	137	257	266	157	559	222	248	261	642	380	na	na	na	na	na	na	na	na	na	na	420	622	329	411	508	484	477	846	704
E118P	na	na	na	na	na	na	na	na	na	na	na	na	na	na	na	na	na	na	na	na	265	397	378	229	295	342	319	314	1063	678	na	na	na	na	na	na	na	na	na	na	882	1179	478	693	936	897	856	1311	1060
E118Q	na	na	na	na	na	na	na	na	na	na	na	na	na	na	na	na	na	na	na	na	34	23	41	23	39	54	36	39	103	76	na	na	na	na	na	na	na	na	na	na	127	151	48	101	81	67	96	170	119
E118R	na	na	na	na	na	na	na	na	na	na	na	na	na	na	na	na	na	na	na	na	298	450	449	325	285	381	405	735	1185	759	na	na	na	na	na	na	na	na	na	na	885	1588	554	818	1008	1545	1210	1779	1510
E118S	na	na	na	na	na	na	na	na	na	na	na	na	na	na	na	na	na	na	na	na	157	267	363	145	171	220	235	245	704	470	na	na	na	na	na	na	na	na	na	na	483	1061	327	439	568	622	530	766	747
E118T	na	na	na	na	na	na	na	na	na	na	na	na	na	na	na	na	na	na	na	na	413	663	610	397	465	508	583	679	1817	990	na	na	na	na	na	na	na	na	na	na	1101	1376	691	1097	1436	1290	1499	2116	1920
E118V	na	na	na	na	na	na	na	na	na	na	na	na	na	na	na	na	na	na	na	na	525	743	638	391	450	518	464	506	1474	985	na	na	na	na	na	na	na	na	na	na	1425	1620	882	1094	1519	1483	1482	2015	1608
E118W	na	na	na	na	na	na	na	na	na	na	na	na	na	na	na	na	na	na	na	na	33	27	74	33	27	29	53	46	120	66	na	na	na	na	na	na	na	na	na	na	136	121	77	84	88	124	118	135	114
E118Y	na	na	na	na	na	na	na	na	na	na	na	na	na	na	na	na	na	na	na	na	5	17	23	15	12	18	28	15	47	39	na	na	na	na	na	na	na	na	na	na	52	72	22	30	58	51	48	87	43
E120*	na	na	na	na	na	na	na	na	na	na	na	na	na	na	na	na	na	na	na	na	161	16	3	3	4	na	4	na	5	na	na	na	na	na	na	na	na	na	na	na	329	61	31	24	24	25	12	na	8
E120A	na	na	na	na	na	na	na	na	na	na	na	na	na	na	na	na	na	na	na	na	514	356	303	189	180	216	148	78	223	186	na	na	na	na	na	na	na	na	na	na	1481	1205	465	398	534	440	327	394	231
E120C	na	na	na	na	na	na	na	na	na	na	na	na	na	na	na	na	na	na	na	na	59	81	76	64	117	54	80	59	144	98	na	na	na	na	na	na	na	na	na	na	195	219	96	140	166	159	137	216	234
E120D	na	na	na	na	na	na	na	na	na	na	na	na	na	na	na	na	na	na	na	na	152	356	259	134	100	167	235	199	752	373	na	na	na	na	na	na	na	na	na	na	495	688	312	388	410	474	515	807	639
E120F	na	na	na	na	na	na	na	na	na	na	na	na	na	na	na	na	na	na	na	na	275	267	268	149	155	222	285	298	571	386	na	na	na	na	na	na	na	na	na	na	763	743	325	433	644	616	550	893	672
E120G	na	na	na	na	na	na	na	na	na	na	na	na	na	na	na	na	na	na	na	na	886	817	1146	569	704	641	780	799	2028	1318	na	na	na	na	na	na	na	na	na	na	3092	3366	1389	1632	2143	2246	2238	3162	2790
E120H	na	na	na	na	na	na	na	na	na	na	na	na	na	na	na	na	na	na	na	na	411	601	446	297	295	424	373	463	1063	666	na	na	na	na	na	na	na	na	na	na	1026	1636	558	725	908	1019	1018	1526	1022
E120I	na	na	na	na	na	na	na	na	na	na	na	na	na	na	na	na	na	na	na	na	310	393	361	257	293	275	283	330	561	381	na	na	na	na	na	na	na	na	na	na	885	1042	461	523	610	623	605	873	623
E120K	na	na	na	na	na	na	na	na	na	na	na	na	na	na	na	na	na	na	na	na	645	1202	1471	771	856	1175	1324	1269	3996	2290	na	na	na	na	na	na	na	na	na	na	2447	3285	1660	2424	3106	3024	3305	4855	4401
E120L	na	na	na	na	na	na	na	na	na	na	na	na	na	na	na	na	na	na	na	na	1370	1961	2028	1100	1494	1577	1629	1635	4241	2631	na	na	na	na	na	na	na	na	na	na	4617	4988	2521	3404	3883	4118	3864	5958	5256
E120M	na	na	na	na	na	na	na	na	na	na	na	na	na	na	na	na	na	na	na	na	382	709	568	314	453	443	477	438	1086	737	na	na	na	na	na	na	na	na	na	na	1288	1582	804	805	1029	1215	1128	1649	1395
E120N	na	na	na	na	na	na	na	na	na	na	na	na	na	na	na	na	na	na	na	na	539	834	773	617	582	699	723	732	1978	1449	na	na	na	na	na	na	na	na	na	na	1833	2121	961	1291	1655	1704	1721	2795	1966
E120P	na	na	na	na	na	na	na	na	na	na	na	na	na	na	na	na	na	na	na	na	1246	966	870	457	430	467	329	387	509	405	na	na	na	na	na	na	na	na	na	na	3565	3124	1236	967	1082	1105	695	906	574
E120Q	na	na	na	na	na	na	na	na	na	na	na	na	na	na	na	na	na	na	na	na	345	526	528	274	327	377	414	405	1126	700	na	na	na	na	na	na	na	na	na	na	953	1958	667	771	1035	961	966	1377	1341
E120R	na	na	na	na	na	na	na	na	na	na	na	na	na	na	na	na	na	na	na	na	815	1375	1529	775	891	1149	1373	1559	4311	2606	na	na	na	na	na	na	na	na	na	na	2782	4237	1892	2858	3680	3696	3951	6318	5889
E120S	na	na	na	na	na	na	na	na	na	na	na	na	na	na	na	na	na	na	na	na	712	940	1016	535	568	685	629	564	1424	841	na	na	na	na	na	na	na	na	na	na	2511	2551	1212	1495	1766	1785	1535	1910	1666
E120T	na	na	na	na	na	na	na	na	na	na	na	na	na	na	na	na	na	na	na	na	708	1171	1027	589	731	753	938	1012	2304	1586	na	na	na	na	na	na	na	na	na	na	2395	3253	1350	1687	2073	2091	2206	3159	2756
E120V	na	na	na	na	na	na	na	na	na	na	na	na	na	na	na	na	na	na	na	na	827	906	978	655	501	657	621	523	1164	819	na	na	na	na	na	na	na	na	na	na	2860	3023	1201	1255	1544	1892	1485	1767	1408
E120W	na	na	na	na	na	na	na	na	na	na	na	na	na	na	na	na	na	na	na	na	352	470	566	282	389	382	366	376	1049	871	na	na	na	na	na	na	na	na	na	na	1238	1945	624	823	1047	1057	1014	1622	1340
E120Y	na	na	na	na	na	na	na	na	na	na	na	na	na	na	na	na	na	na	na	na	261	445	385	170	157	228	251	258	624	395	na	na	na	na	na	na	na	na	na	na	710	962	362	494	519	616	613	828	821
E129*	na	na	na	na	na	na	na	na	na	na	na	na	na	na	na	na	na	na	na	na	na	na	na	na	na	na	na	na	na	na	58	na	na	na	2	na	na	na	na	na	4	na	na	na	na	na	na	na	na
E129A	na	na	na	na	na	na	na	na	na	na	na	na	na	na	na	na	na	na	na	na	na	na	na	na	na	na	na	na	na	na	144	201	53	63	52	48	85	83	85	88	358	340	142	154	155	151	151	269	199
E129C	na	na	na	na	na	na	na	na	na	na	na	na	na	na	na	na	na	na	na	na	na	na	na	na	na	na	na	na	na	na	168	181	73	68	62	66	77	99	117	99	320	344	176	194	229	209	214	287	245
E129D	na	na	na	na	na	na	na	na	na	na	na	na	na	na	na	na	na	na	na	na	na	na	na	na	na	na	na	na	na	na	141	205	73	61	65	57	91	97	110	96	324	373	146	174	144	459	233	302	158
E129F	na	na	na	na	na	na	na	na	na	na	na	na	na	na	na	na	na	na	na	na	na	na	na	na	na	na	na	na	na	na	438	602	190	279	229	191	383	383	406	397	1051	1119	550	735	859	964	843	1255	1034
E129G	na	na	na	na	na	na	na	na	na	na	na	na	na	na	na	na	na	na	na	na	na	na	na	na	na	na	na	na	na	na	403	672	215	224	263	217	388	395	441	463	2055	2860	1250	1569	1797	2850	1824	2670	2281
E129H	na	na	na	na	na	na	na	na	na	na	na	na	na	na	na	na	na	na	na	na	na	na	na	na	na	na	na	na	na	na	323	442	134	171	165	153	184	276	319	292	632	745	328	460	524	472	563	796	777
E129I	na	na	na	na	na	na	na	na	na	na	na	na	na	na	na	na	na	na	na	na	na	na	na	na	na	na	na	na	na	na	232	204	51	97	74	74	104	97	141	136	476	500	188	262	289	691	271	312	351
E129K	na	na	na	na	na	na	na	na	na	na	na	na	na	na	na	na	na	na	na	na	na	na	na	na	na	na	na	na	na	na	260	426	84	159	139	116	192	183	198	198	564	749	230	355	351	468	339	600	463
E129L	na	na	na	na	na	na	na	na	na	na	na	na	na	na	na	na	na	na	na	na	na	na	na	na	na	na	na	na	na	na	977	1304	378	454	506	336	572	647	694	723	2061	16	1140	1319	1505	1671	1476	2109	1667
E129M	na	na	na	na	na	na	na	na	na	na	na	na	na	na	na	na	na	na	na	na	na	na	na	na	na	na	na	na	na	na	202	260	95	99	108	107	125	160	190	192	521	594	239	293	354	428	398	587	498
E129N	na	na	na	na	na	na	na	na	na	na	na	na	na	na	na	na	na	na	na	na	na	na	na	na	na	na	na	na	na	na	511	534	188	219	220	175	259	401	298	278	4	1278	548	575	709	641	647	1036	732
E129P	na	na	na	na	na	na	na	na	na	na	na	na	na	na	na	na	na	na	na	na	na	na	na	na	na	na	na	na	na	na	916	1383	426	565	504	392	688	761	849	852	3	2615	1126	1481	1758	1929	1689	2446	2154
E129Q	na	na	na	na	na	na	na	na	na	na	na	na	na	na	na	na	na	na	na	na	na	na	na	na	na	na	na	na	na	na	232	209	48	77	82	75	106	155	138	181	462	424	193	246	315	309	336	388	391
E129R	na	na	na	na	na	na	na	na	na	na	na	na	na	na	na	na	na	na	na	na	na	na	na	na	na	na	na	na	na	na	749	884	274	368	317	300	457	576	470	645	12	1961	840	1089	1207	1585	1213	1774	1352
E129S	na	na	na	na	na	na	na	na	na	na	na	na	na	na	na	na	na	na	na	na	na	na	na	na	na	na	na	na	na	na	424	826	223	253	235	201	274	313	386	350	928	1072	546	620	757	949	670	842	971
E129T	na	na	na	na	na	na	na	na	na	na	na	na	na	na	na	na	na	na	na	na	na	na	na	na	na	na	na	na	na	na	289	376	131	166	130	110	165	189	211	205	703	817	299	456	468	535	460	579	533
E129V	na	na	na	na	na	na	na	na	na	na	na	na	na	na	na	na	na	na	na	na	na	na	na	na	na	na	na	na	na	na	279	304	88	132	106	99	140	152	174	213	767	853	328	408	428	376	413	625	429
E129W	na	na	na	na	na	na	na	na	na	na	na	na	na	na	na	na	na	na	na	na	na	na	na	na	na	na	na	na	na	na	237	291	97	147	121	118	204	237	215	197	542	688	300	395	444	452	464	715	642
E129Y	na	na	na	na	na	na	na	na	na	na	na	na	na	na	na	na	na	na	na	na	na	na	na	na	na	na	na	na	na	na	163	241	89	114	105	89	101	147	136	160	369	509	240	295	337	351	365	444	408
E134*	na	na	na	na	na	na	na	na	na	na	na	na	na	na	na	na	na	na	na	na	na	na	na	na	na	na	na	na	na	na	122	14	10	5	5	4	8	na	5	2	171	35	19	14	13	7	6	10	6
E134A	na	na	na	na	na	na	na	na	na	na	na	na	na	na	na	na	na	na	na	na	na	na	na	na	na	na	na	na	na	na	474	524	197	259	208	190	273	271	343	291	1075	1204	494	525	738	734	650	914	676
E134C	na	na	na	na	na	na	na	na	na	na	na	na	na	na	na	na	na	na	na	na	na	na	na	na	na	na	na	na	na	na	212	190	85	138	112	70	120	127	156	146	463	632	228	227	326	340	361	374	315
E134D	na	na	na	na	na	na	na	na	na	na	na	na	na	na	na	na	na	na	na	na	na	na	na	na	na	na	na	na	na	na	194	162	54	51	56	30	41	37	60	11	408	3	96	127	166	154	99	146	49
E134F	na	na	na	na	na	na	na	na	na	na	na	na	na	na	na	na	na	na	na	na	na	na	na	na	na	na	na	na	na	na	1055	1189	431	518	444	380	656	655	681	616	5	2819	970	1244	1403	1572	1418	2013	1749
E134G	na	na	na	na	na	na	na	na	na	na	na	na	na	na	na	na	na	na	na	na	na	na	na	na	na	na	na	na	na	na	2216	2905	860	1050	973	913	1348	1738	1767	1917	4894	5882	2418	2784	3339	3176	3074	4582	3559
E134H	na	na	na	na	na	na	na	na	na	na	na	na	na	na	na	na	na	na	na	na	na	na	na	na	na	na	na	na	na	na	455	535	168	210	203	167	265	344	337	314	1000	1198	439	572	628	667	684	858	664
E134I	na	na	na	na	na	na	na	na	na	na	na	na	na	na	na	na	na	na	na	na	na	na	na	na	na	na	na	na	na	na	306	503	188	135	136	131	176	159	230	215	7	846	377	359	391	562	400	632	505
E134K	na	na	na	na	na	na	na	na	na	na	na	na	na	na	na	na	na	na	na	na	na	na	na	na	na	na	na	na	na	na	952	1477	482	521	441	436	575	811	792	803	5	5	950	1239	1481	1733	1413	1930	1607
E134L	na	na	na	na	na	na	na	na	na	na	na	na	na	na	na	na	na	na	na	na	na	na	na	na	na	na	na	na	na	na	1441	1705	627	670	627	577	891	981	1169	1173	8	21	1441	1767	2012	2094	2234	2856	2373
E134M	na	na	na	na	na	na	na	na	na	na	na	na	na	na	na	na	na	na	na	na	na	na	na	na	na	na	na	na	na	na	405	553	183	193	193	175	282	319	259	272	947	1039	424	420	543	556	581	920	605
E134N	na	na	na	na	na	na	na	na	na	na	na	na	na	na	na	na	na	na	na	na	na	na	na	na	na	na	na	na	na	na	696	883	221	263	287	232	329	368	415	413	1603	1792	701	783	962	973	938	1289	902
E134P	na	na	na	na	na	na	na	na	na	na	na	na	na	na	na	na	na	na	na	na	na	na	na	na	na	na	na	na	na	na	2079	3147	1214	1411	1421	1156	2074	2256	2384	2577	28	7	2951	3910	4368	4560	4544	6511	5485
E134Q	na	na	na	na	na	na	na	na	na	na	na	na	na	na	na	na	na	na	na	na	na	na	na	na	na	na	na	na	na	na	218	208	73	113	90	93	120	140	147	182	457	496	205	255	302	260	277	399	338
E134R	na	na	na	na	na	na	na	na	na	na	na	na	na	na	na	na	na	na	na	na	na	na	na	na	na	na	na	na	na	na	1171	1557	502	517	480	388	665	744	903	809	2440	3060	1203	1281	1647	1615	1576	2327	1855
E134S	na	na	na	na	na	na	na	na	na	na	na	na	na	na	na	na	na	na	na	na	na	na	na	na	na	na	na	na	na	na	749	847	354	332	348	272	439	452	479	429	1653	1803	778	812	928	948	907	1286	866
E134T	na	na	na	na	na	na	na	na	na	na	na	na	na	na	na	na	na	na	na	na	na	na	na	na	na	na	na	na	na	na	686	871	263	268	277	261	383	326	403	419	1607	1747	642	734	964	995	892	1229	939
E134V	na	na	na	na	na	na	na	na	na	na	na	na	na	na	na	na	na	na	na	na	na	na	na	na	na	na	na	na	na	na	1036	1425	341	493	508	447	737	729	885	848	8	2789	1260	1504	1689	1848	1816	2302	2165
E134W	na	na	na	na	na	na	na	na	na	na	na	na	na	na	na	na	na	na	na	na	na	na	na	na	na	na	na	na	na	na	359	362	111	175	119	134	199	199	207	184	734	21	364	354	402	458	433	646	491
E134Y	na	na	na	na	na	na	na	na	na	na	na	na	na	na	na	na	na	na	na	na	na	na	na	na	na	na	na	na	na	na	261	293	98	134	112	91	162	161	201	142	515	656	322	288	381	455	296	527	442
E139*	na	na	na	na	na	na	na	na	na	na	na	na	na	na	na	na	na	na	na	na	na	na	na	na	na	na	na	na	na	na	132	27	6	na	4	3	na	6	3	na	159	31	18	10	4	6	7	6	6
E139A	na	na	na	na	na	na	na	na	na	na	na	na	na	na	na	na	na	na	na	na	na	na	na	na	na	na	na	na	na	na	480	571	167	213	138	165	195	226	217	214	1121	1191	423	482	524	489	595	683	465
E139C	na	na	na	na	na	na	na	na	na	na	na	na	na	na	na	na	na	na	na	na	na	na	na	na	na	na	na	na	na	na	250	305	135	111	85	88	128	123	132	110	531	625	303	284	340	320	324	383	309
E139D	na	na	na	na	na	na	na	na	na	na	na	na	na	na	na	na	na	na	na	na	na	na	na	na	na	na	na	na	na	na	284	403	245	108	102	95	164	172	159	187	616	858	286	386	331	351	301	507	338
E139F	na	na	na	na	na	na	na	na	na	na	na	na	na	na	na	na	na	na	na	na	na	na	na	na	na	na	na	na	na	na	1126	1462	392	541	647	403	613	679	680	786	4	6	1193	1348	1450	2322	1496	1907	1517
E139G	na	na	na	na	na	na	na	na	na	na	na	na	na	na	na	na	na	na	na	na	na	na	na	na	na	na	na	na	na	na	1110	1389	425	472	392	309	426	594	587	463	3	5	1123	1238	1528	1427	1175	1601	1351
E139H	na	na	na	na	na	na	na	na	na	na	na	na	na	na	na	na	na	na	na	na	na	na	na	na	na	na	na	na	na	na	625	725	222	269	253	216	292	317	384	308	1470	1674	593	754	857	921	819	1147	781
E139I	na	na	na	na	na	na	na	na	na	na	na	na	na	na	na	na	na	na	na	na	na	na	na	na	na	na	na	na	na	na	297	449	231	144	116	96	104	165	169	235	699	838	346	328	397	451	383	529	462
E139K	na	na	na	na	na	na	na	na	na	na	na	na	na	na	na	na	na	na	na	na	na	na	na	na	na	na	na	na	na	na	767	945	259	279	250	229	358	347	387	395	14	16	700	1004	944	954	894	1106	827
E139L	na	na	na	na	na	na	na	na	na	na	na	na	na	na	na	na	na	na	na	na	na	na	na	na	na	na	na	na	na	na	2451	2964	864	1078	896	849	1371	1423	1466	1336	4	6558	2476	2981	3382	3716	3093	4226	3283
E139M	na	na	na	na	na	na	na	na	na	na	na	na	na	na	na	na	na	na	na	na	na	na	na	na	na	na	na	na	na	na	475	903	198	213	196	172	238	292	336	259	1265	1405	490	608	686	667	601	786	588
E139N	na	na	na	na	na	na	na	na	na	na	na	na	na	na	na	na	na	na	na	na	na	na	na	na	na	na	na	na	na	na	531	529	256	236	226	156	359	305	275	324	1137	1361	523	568	776	667	677	753	682
E139P	na	na	na	na	na	na	na	na	na	na	na	na	na	na	na	na	na	na	na	na	na	na	na	na	na	na	na	na	na	na	1615	1325	342	400	299	257	304	339	377	459	3	2722	1166	935	726	851	558	680	646
E139Q	na	na	na	na	na	na	na	na	na	na	na	na	na	na	na	na	na	na	na	na	na	na	na	na	na	na	na	na	na	na	356	350	105	129	116	97	142	119	173	180	787	889	294	384	397	362	337	474	377
E139R	na	na	na	na	na	na	na	na	na	na	na	na	na	na	na	na	na	na	na	na	na	na	na	na	na	na	na	na	na	na	1193	1448	406	508	404	356	509	548	572	576	4	23	1160	1264	1682	1502	1358	1957	1410
E139S	na	na	na	na	na	na	na	na	na	na	na	na	na	na	na	na	na	na	na	na	na	na	na	na	na	na	na	na	na	na	846	964	263	369	308	245	366	434	464	405	2106	2291	901	948	1088	1170	1054	1372	1003
E139T	na	na	na	na	na	na	na	na	na	na	na	na	na	na	na	na	na	na	na	na	na	na	na	na	na	na	na	na	na	na	743	804	254	316	272	227	373	388	386	429	1579	1753	621	790	961	972	872	1305	925
E139V	na	na	na	na	na	na	na	na	na	na	na	na	na	na	na	na	na	na	na	na	na	na	na	na	na	na	na	na	na	na	967	1173	371	428	396	326	513	573	527	449	5	2723	939	1188	1378	1361	1308	1511	1258
E139W	na	na	na	na	na	na	na	na	na	na	na	na	na	na	na	na	na	na	na	na	na	na	na	na	na	na	na	na	na	na	337	400	132	159	144	132	142	202	173	148	780	948	359	368	421	445	397	545	369
E139Y	na	na	na	na	na	na	na	na	na	na	na	na	na	na	na	na	na	na	na	na	na	na	na	na	na	na	na	na	na	na	283	387	117	176	125	102	147	142	198	161	764	781	321	389	426	398	373	560	304
E154*	na	na	na	na	na	na	na	na	na	na	na	na	na	na	na	na	na	na	na	na	na	na	na	na	na	na	na	na	na	na	42	2	na	na	na	na	na	na	na	na	39	na	na	na	na	na	na	na	na
E154A	na	na	na	na	na	na	na	na	na	na	na	na	na	na	na	na	na	na	na	na	na	na	na	na	na	na	na	na	na	na	284	618	197	245	303	267	411	574	617	685	692	1089	479	712	764	1027	947	1633	1471
E154C	na	na	na	na	na	na	na	na	na	na	na	na	na	na	na	na	na	na	na	na	na	na	na	na	na	na	na	na	na	na	103	130	72	87	72	88	133	207	198	221	280	422	218	272	334	361	353	631	514
E154D	na	na	na	na	na	na	na	na	na	na	na	na	na	na	na	na	na	na	na	na	na	na	na	na	na	na	na	na	na	na	167	258	90	144	111	116	153	229	243	276	336	515	226	317	357	402	443	613	602
E154F	na	na	na	na	na	na	na	na	na	na	na	na	na	na	na	na	na	na	na	na	na	na	na	na	na	na	na	na	na	na	219	500	146	161	189	131	317	303	370	412	549	765	390	492	644	615	576	980	869
E154G	na	na	na	na	na	na	na	na	na	na	na	na	na	na	na	na	na	na	na	na	na	na	na	na	na	na	na	na	na	na	6	1778	731	776	782	592	1095	1531	1455	1680	8	3797	1483	1972	2388	2511	2517	3816	3438
E154H	na	na	na	na	na	na	na	na	na	na	na	na	na	na	na	na	na	na	na	na	na	na	na	na	na	na	na	na	na	na	191	305	142	176	186	117	265	317	296	332	410	743	279	447	527	520	559	812	762
E154I	na	na	na	na	na	na	na	na	na	na	na	na	na	na	na	na	na	na	na	na	na	na	na	na	na	na	na	na	na	na	98	284	125	73	83	92	126	167	171	228	271	420	177	231	276	279	322	484	429
E154K	na	na	na	na	na	na	na	na	na	na	na	na	na	na	na	na	na	na	na	na	na	na	na	na	na	na	na	na	na	na	303	551	228	223	237	198	398	553	625	831	661	1155	384	702	822	1483	999	1583	1559
E154L	na	na	na	na	na	na	na	na	na	na	na	na	na	na	na	na	na	na	na	na	na	na	na	na	na	na	na	na	na	na	624	1236	415	589	537	414	859	1203	1291	1437	1552	2341	1049	1477	1837	1845	2155	3073	2835
E154M	na	na	na	na	na	na	na	na	na	na	na	na	na	na	na	na	na	na	na	na	na	na	na	na	na	na	na	na	na	na	179	237	92	118	135	136	253	336	342	408	384	683	242	413	516	569	627	911	955
E154N	na	na	na	na	na	na	na	na	na	na	na	na	na	na	na	na	na	na	na	na	na	na	na	na	na	na	na	na	na	na	376	683	233	293	245	222	366	570	607	661	886	1410	570	738	867	1028	1014	1586	1414
E154P	na	na	na	na	na	na	na	na	na	na	na	na	na	na	na	na	na	na	na	na	na	na	na	na	na	na	na	na	na	na	335	34	21	21	8	14	9	12	12	5	429	129	35	22	29	19	15	19	6
E154Q	na	na	na	na	na	na	na	na	na	na	na	na	na	na	na	na	na	na	na	na	na	na	na	na	na	na	na	na	na	na	119	257	57	119	101	107	191	270	253	238	333	548	229	326	413	409	408	600	576
E154R	na	na	na	na	na	na	na	na	na	na	na	na	na	na	na	na	na	na	na	na	na	na	na	na	na	na	na	na	na	na	528	1016	346	486	511	380	697	1070	1184	1272	1391	2103	915	1356	1645	1715	1829	2701	2647
E154S	na	na	na	na	na	na	na	na	na	na	na	na	na	na	na	na	na	na	na	na	na	na	na	na	na	na	na	na	na	na	540	1013	339	451	426	391	667	803	948	1096	3	1836	820	1185	1401	1579	1671	2427	2231
E154T	na	na	na	na	na	na	na	na	na	na	na	na	na	na	na	na	na	na	na	na	na	na	na	na	na	na	na	na	na	na	451	899	349	425	397	359	627	889	921	1075	4	1764	810	1142	1431	1470	1539	2361	2343
E154V	na	na	na	na	na	na	na	na	na	na	na	na	na	na	na	na	na	na	na	na	na	na	na	na	na	na	na	na	na	na	432	1063	239	384	415	362	615	878	1011	1416	1119	1804	679	1124	1334	1329	1486	2533	2872
E154W	na	na	na	na	na	na	na	na	na	na	na	na	na	na	na	na	na	na	na	na	na	na	na	na	na	na	na	na	na	na	232	365	166	162	181	150	252	332	411	516	584	777	408	528	644	715	632	1046	997
E154Y	na	na	na	na	na	na	na	na	na	na	na	na	na	na	na	na	na	na	na	na	na	na	na	na	na	na	na	na	na	na	121	172	95	99	94	59	120	161	222	222	290	413	202	278	322	359	303	523	537
E157*	na	na	na	na	na	na	na	na	na	na	na	na	na	na	na	na	na	na	na	na	na	na	na	na	na	na	na	na	na	na	46	na	na	na	na	2	na	na	na	na	16	na	na	na	na	na	na	na	na
E157A	na	na	na	na	na	na	na	na	na	na	na	na	na	na	na	na	na	na	na	na	na	na	na	na	na	na	na	na	na	na	443	565	173	184	206	150	283	244	277	311	1097	1151	514	540	609	686	638	782	698
E157C	na	na	na	na	na	na	na	na	na	na	na	na	na	na	na	na	na	na	na	na	na	na	na	na	na	na	na	na	na	na	67	56	28	37	18	30	37	35	35	50	3	216	104	88	98	112	103	91	110
E157D	na	na	na	na	na	na	na	na	na	na	na	na	na	na	na	na	na	na	na	na	na	na	na	na	na	na	na	na	na	na	222	199	70	90	78	68	124	89	106	254	572	538	173	225	274	259	290	317	224
E157F	na	na	na	na	na	na	na	na	na	na	na	na	na	na	na	na	na	na	na	na	na	na	na	na	na	na	na	na	na	na	164	166	55	65	69	63	82	85	92	78	400	424	192	200	254	237	200	232	170
E157G	na	na	na	na	na	na	na	na	na	na	na	na	na	na	na	na	na	na	na	na	na	na	na	na	na	na	na	na	na	na	1074	1247	401	487	409	347	565	712	763	825	2490	2845	1053	1142	1489	1624	1448	2113	1633
E157H	na	na	na	na	na	na	na	na	na	na	na	na	na	na	na	na	na	na	na	na	na	na	na	na	na	na	na	na	na	na	210	324	108	89	92	78	94	110	116	99	527	502	205	245	312	324	270	357	234
E157I	na	na	na	na	na	na	na	na	na	na	na	na	na	na	na	na	na	na	na	na	na	na	na	na	na	na	na	na	na	na	183	294	120	103	89	78	97	98	109	118	536	679	231	255	234	317	256	285	273
E157K	na	na	na	na	na	na	na	na	na	na	na	na	na	na	na	na	na	na	na	na	na	na	na	na	na	na	na	na	na	na	493	570	159	171	200	156	240	258	298	258	1131	1089	389	492	571	487	517	611	645
E157L	na	na	na	na	na	na	na	na	na	na	na	na	na	na	na	na	na	na	na	na	na	na	na	na	na	na	na	na	na	na	598	621	194	246	191	160	304	241	292	203	1384	1480	460	558	744	661	638	686	531
E157M	na	na	na	na	na	na	na	na	na	na	na	na	na	na	na	na	na	na	na	na	na	na	na	na	na	na	na	na	na	na	178	215	68	66	54	69	86	111	103	102	466	541	198	185	226	247	233	285	210
E157N	na	na	na	na	na	na	na	na	na	na	na	na	na	na	na	na	na	na	na	na	na	na	na	na	na	na	na	na	na	na	606	680	228	246	226	171	292	315	370	379	1433	1722	579	698	744	829	724	916	650
E157P	na	na	na	na	na	na	na	na	na	na	na	na	na	na	na	na	na	na	na	na	na	na	na	na	na	na	na	na	na	na	984	570	128	74	66	43	58	38	42	55	2184	1002	223	163	156	76	74	79	108
E157Q	na	na	na	na	na	na	na	na	na	na	na	na	na	na	na	na	na	na	na	na	na	na	na	na	na	na	na	na	na	na	195	253	62	68	72	44	75	70	110	181	338	398	162	165	259	204	221	340	228
E157R	na	na	na	na	na	na	na	na	na	na	na	na	na	na	na	na	na	na	na	na	na	na	na	na	na	na	na	na	na	na	442	676	157	175	195	147	232	264	279	295	1039	1059	432	498	632	568	562	778	641
E157S	na	na	na	na	na	na	na	na	na	na	na	na	na	na	na	na	na	na	na	na	na	na	na	na	na	na	na	na	na	na	623	676	237	316	243	224	297	355	407	369	1423	1506	577	753	788	948	831	1154	894
E157T	na	na	na	na	na	na	na	na	na	na	na	na	na	na	na	na	na	na	na	na	na	na	na	na	na	na	na	na	na	na	927	1084	313	372	357	268	533	447	475	479	1989	2336	822	983	1063	1091	1059	1263	1022
E157V	na	na	na	na	na	na	na	na	na	na	na	na	na	na	na	na	na	na	na	na	na	na	na	na	na	na	na	na	na	na	642	799	282	238	209	182	259	282	349	285	1595	1490	562	619	790	743	675	847	668
E157W	na	na	na	na	na	na	na	na	na	na	na	na	na	na	na	na	na	na	na	na	na	na	na	na	na	na	na	na	na	na	183	184	57	99	81	40	63	80	97	55	353	407	118	167	179	197	189	232	135
E157Y	na	na	na	na	na	na	na	na	na	na	na	na	na	na	na	na	na	na	na	na	na	na	na	na	na	na	na	na	na	na	143	337	50	74	81	50	60	79	83	96	422	411	154	190	197	214	176	229	168
E17*	175	48	20	4	5	7	2	na	na	na	231	1	13	7	6	3	4	na	na	na	1	1	15	25	3	6	2	na	5	4	na	na	na	na	na	na	na	na	na	na	na	na	na	na	na	na	na	na	na
E17A	1041	1635	431	280	407	235	269	442	811	189	419	1124	446	248	337	299	285	299	337	284	644	1	750	369	370	320	322	228	731	589	na	na	na	na	na	na	na	na	na	na	na	na	na	na	na	na	na	na	na
E17C	419	626	219	128	122	66	51	83	62	39	216	396	129	88	93	103	94	36	66	113	391	591	291	145	150	172	91	102	245	155	na	na	na	na	na	na	na	na	na	na	na	na	na	na	na	na	na	na	na
E17D	328	537	198	87	105	183	84	376	79	198	218	1	90	55	84	179	121	91	112	330	280	1	265	114	116	132	138	143	373	215	na	na	na	na	na	na	na	na	na	na	na	na	na	na	na	na	na	na	na
E17F	825	1085	347	161	143	104	85	155	41	64	401	681	149	364	73	184	87	77	86	167	763	942	606	269	315	301	133	80	165	177	na	na	na	na	na	na	na	na	na	na	na	na	na	na	na	na	na	na	na
E17G	3166	5287	1520	1047	1358	1713	1299	2035	1150	1939	1211	4	954	873	1010	1448	1535	1057	1510	2736	7	9	2621	1510	1662	1908	1785	1541	4828	3020	na	na	na	na	na	na	na	na	na	na	na	na	na	na	na	na	na	na	na
E17H	517	833	188	91	66	35	46	44	16	36	188	413	119	110	86	129	28	33	40	28	409	543	245	154	94	134	70	43	71	117	na	na	na	na	na	na	na	na	na	na	na	na	na	na	na	na	na	na	na
E17I	191	181	34	21	6	na	3	19	na	na	116	85	21	10	5	na	5	3	na	na	185	68	36	17	10	13	2	6	na	41	na	na	na	na	na	na	na	na	na	na	na	na	na	na	na	na	na	na	na
E17K	1980	2613	779	352	267	229	176	321	74	147	1140	3	474	422	267	439	405	594	240	159	1600	2359	1216	572	391	490	236	228	322	264	na	na	na	na	na	na	na	na	na	na	na	na	na	na	na	na	na	na	na
E17L	3437	4998	1488	859	707	499	357	1188	246	398	1420	1	874	1127	795	3889	806	775	514	532	2	1	2589	1130	1144	1271	701	719	1171	955	na	na	na	na	na	na	na	na	na	na	na	na	na	na	na	na	na	na	na
E17M	627	933	223	193	64	65	55	171	28	25	334	529	136	149	73	117	76	116	84	107	582	719	575	213	219	199	87	69	133	165	na	na	na	na	na	na	na	na	na	na	na	na	na	na	na	na	na	na	na
E17N	870	1530	472	226	258	150	234	349	167	219	433	912	267	290	214	520	258	180	275	365	793	1	669	308	358	537	365	387	632	584	na	na	na	na	na	na	na	na	na	na	na	na	na	na	na	na	na	na	na
E17P	1323	416	296	64	98	46	24	55	26	21	970	460	184	67	56	102	11	10	18	23	1289	283	103	55	27	33	21	16	26	20	na	na	na	na	na	na	na	na	na	na	na	na	na	na	na	na	na	na	na
E17Q	880	1493	436	189	189	237	105	57	59	83	366	1	208	167	128	449	125	90	102	23	771	1	630	289	208	250	195	146	261	221	na	na	na	na	na	na	na	na	na	na	na	na	na	na	na	na	na	na	na
E17R	2574	2986	824	242	274	621	117	93	73	240	1226	1779	463	367	259	519	176	125	152	104	3	8195	1147	481	372	414	141	112	177	198	na	na	na	na	na	na	na	na	na	na	na	na	na	na	na	na	na	na	na
E17S	2272	4612	1281	747	722	572	606	920	409	644	1148	2349	733	613	603	824	560	738	669	813	1894	4407	1701	982	1016	1114	815	890	1983	1324	na	na	na	na	na	na	na	na	na	na	na	na	na	na	na	na	na	na	na
E17T	1180	1492	470	228	125	192	116	82	69	54	495	959	277	358	160	299	77	90	109	144	989	1437	824	303	253	314	115	134	236	195	na	na	na	na	na	na	na	na	na	na	na	na	na	na	na	na	na	na	na
E17V	1739	2195	686	228	275	113	111	244	29	66	786	3	341	330	249	326	99	250	174	81	2	3	868	415	397	323	195	118	201	230	na	na	na	na	na	na	na	na	na	na	na	na	na	na	na	na	na	na	na
E17W	2048	2264	683	227	179	257	86	185	41	48	1085	1913	372	357	230	658	176	82	150	93	1	1605	994	376	270	331	156	98	143	217	na	na	na	na	na	na	na	na	na	na	na	na	na	na	na	na	na	na	na
E17Y	342	519	183	84	74	55	33	21	13	33	125	405	95	75	46	91	41	21	33	22	321	369	240	132	88	90	66	58	137	89	na	na	na	na	na	na	na	na	na	na	na	na	na	na	na	na	na	na	na
E48*	341	29	12	3	4	10	5	na	na	na	12	43	55	63	6	65	11	2	3	22	na	na	na	na	na	na	na	na	na	na	306	84	23	9	5	8	6	8	10	5	na	na	na	na	na	na	na	na	na
E48A	879	1326	602	454	554	481	501	765	584	842	367	517	295	170	318	711	576	613	643	739	na	na	na	na	na	na	na	na	na	na	786	986	250	274	200	239	393	408	386	495	na	na	na	na	na	na	na	na	na
E48C	267	428	179	139	162	167	165	271	155	320	213	173	82	78	132	53	187	127	166	279	na	na	na	na	na	na	na	na	na	na	216	344	89	112	74	74	151	175	152	176	na	na	na	na	na	na	na	na	na
E48D	255	293	169	125	137	235	127	170	90	233	100	190	77	54	109	196	102	116	161	163	na	na	na	na	na	na	na	na	na	na	283	327	64	86	83	79	100	92	98	75	na	na	na	na	na	na	na	na	na
E48F	389	935	308	312	323	263	229	548	230	466	263	296	136	139	152	315	239	232	479	337	na	na	na	na	na	na	na	na	na	na	494	774	129	163	185	152	217	225	251	307	na	na	na	na	na	na	na	na	na
E48G	2784	2	1801	1463	2221	1884	2050	5030	2672	4628	2	2162	1137	737	1293	1887	2087	2770	3024	3812	na	na	na	na	na	na	na	na	na	na	2895	3791	846	1136	1079	891	1557	2020	2171	2508	na	na	na	na	na	na	na	na	na
E48H	260	510	297	171	213	293	257	280	247	299	134	269	81	119	132	169	171	911	307	390	na	na	na	na	na	na	na	na	na	na	275	361	83	109	96	76	121	132	149	161	na	na	na	na	na	na	na	na	na
E48I	288	313	197	125	273	81	215	269	139	101	178	278	102	115	98	207	152	95	167	187	na	na	na	na	na	na	na	na	na	na	308	330	64	97	95	71	88	131	102	74	na	na	na	na	na	na	na	na	na
E48K	1575	2	1220	798	1082	1017	962	2078	1182	1980	2	1160	470	469	669	1495	1026	801	1225	1327	na	na	na	na	na	na	na	na	na	na	1541	2334	465	598	554	476	763	764	953	969	na	na	na	na	na	na	na	na	na
E48L	3	3238	1875	1168	1623	1582	1428	3031	1805	2685	1649	1904	984	1082	1202	1916	1516	1486	2198	2936	na	na	na	na	na	na	na	na	na	na	2430	3334	749	921	809	789	1270	1414	1558	1646	na	na	na	na	na	na	na	na	na
E48M	886	1349	669	420	600	624	485	1336	403	886	618	659	391	373	426	485	527	520	686	614	na	na	na	na	na	na	na	na	na	na	1070	1540	293	414	385	287	447	454	569	517	na	na	na	na	na	na	na	na	na
E48N	241	324	176	125	148	83	99	294	149	297	296	227	95	179	197	143	168	111	168	127	na	na	na	na	na	na	na	na	na	na	258	438	79	96	83	71	139	94	100	86	na	na	na	na	na	na	na	na	na
E48P	536	700	351	211	119	169	144	343	73	142	1	351	166	138	158	178	142	151	223	281	na	na	na	na	na	na	na	na	na	na	476	511	116	105	90	83	79	77	104	91	na	na	na	na	na	na	na	na	na
E48Q	1226	1607	757	681	629	709	663	1319	567	1048	1	834	378	692	486	742	862	585	879	1182	na	na	na	na	na	na	na	na	na	na	1162	1516	304	417	362	290	476	525	566	631	na	na	na	na	na	na	na	na	na
E48R	4	5199	2591	1927	2209	2128	2201	4643	3025	4738	2368	2589	1218	1010	1489	2901	2661	2202	3312	4229	na	na	na	na	na	na	na	na	na	na	3402	4553	914	1316	1151	999	1658	1938	2122	2245	na	na	na	na	na	na	na	na	na
E48S	875	1177	614	509	594	599	564	925	623	995	589	667	319	316	415	474	582	542	786	992	na	na	na	na	na	na	na	na	na	na	915	1228	267	376	311	226	365	420	547	521	na	na	na	na	na	na	na	na	na
E48T	812	1183	638	452	445	512	436	1050	372	789	588	572	366	314	272	317	567	330	516	501	na	na	na	na	na	na	na	na	na	na	748	1071	215	294	233	234	285	359	305	304	na	na	na	na	na	na	na	na	na
E48V	1158	13	760	540	746	530	668	1350	695	1209	4	844	523	393	469	934	843	810	896	1386	na	na	na	na	na	na	na	na	na	na	1253	1816	333	490	427	366	591	604	682	887	na	na	na	na	na	na	na	na	na
E48W	1187	2059	1176	1484	1040	1015	1106	2142	1410	2834	764	983	686	409	611	880	1157	1159	1630	1815	na	na	na	na	na	na	na	na	na	na	1486	2221	461	606	560	528	931	1100	1184	1504	na	na	na	na	na	na	na	na	na
E48Y	345	468	237	132	233	332	212	461	242	385	215	261	128	115	143	191	184	171	256	392	na	na	na	na	na	na	na	na	na	na	385	421	95	158	164	109	154	185	191	183	na	na	na	na	na	na	na	na	na
E80*	164	29	8	19	42	2	3	8	5	3	1	24	34	10	22	17	2	21	3	2	na	na	na	na	na	na	na	na	na	na	153	43	9	7	6	9	7	6	4	6	na	na	na	na	na	na	na	na	na
E80A	320	405	222	189	123	143	85	138	148	97	212	258	112	126	108	226	129	101	162	108	na	na	na	na	na	na	na	na	na	na	414	545	110	135	113	83	101	135	117	104	na	na	na	na	na	na	na	na	na
E80C	166	195	64	38	77	50	36	146	64	67	64	87	52	27	49	56	62	62	72	62	na	na	na	na	na	na	na	na	na	na	142	157	43	63	60	34	67	81	62	61	na	na	na	na	na	na	na	na	na
E80D	4	2	13	5	2	16	9	3	2	na	3	12	na	5	5	24	2	na	2	na	na	na	na	na	na	na	na	na	na	na	21	18	4	na	4	8	na	2	na	na	na	na	na	na	na	na	na	na	na
E80F	376	688	276	125	197	120	166	271	184	270	233	316	177	81	111	395	150	146	168	352	na	na	na	na	na	na	na	na	na	na	462	539	144	163	128	119	188	179	190	312	na	na	na	na	na	na	na	na	na
E80G	2	3578	1612	1107	1169	1124	1068	2321	1086	1685	3	1757	1567	733	834	1821	1390	957	1402	1474	na	na	na	na	na	na	na	na	na	na	2354	4	704	983	785	616	914	967	1138	1054	na	na	na	na	na	na	na	na	na
E80H	12	23	5	9	3	17	10	8	2	5	3	6	5	6	1	na	8	7	9	13	na	na	na	na	na	na	na	na	na	na	42	36	10	13	12	6	13	5	10	28	na	na	na	na	na	na	na	na	na
E80I	295	415	135	98	211	155	95	211	88	124	92	185	92	77	133	157	113	64	107	113	na	na	na	na	na	na	na	na	na	na	230	251	63	72	74	70	93	81	109	91	na	na	na	na	na	na	na	na	na
E80K	1544	5	852	641	636	676	621	966	422	736	1	1195	520	882	482	1583	646	585	823	866	na	na	na	na	na	na	na	na	na	na	1373	1925	483	553	483	409	525	509	547	506	na	na	na	na	na	na	na	na	na
E80L	8	2898	1189	818	1033	737	715	1571	625	969	1067	1438	514	546	727	801	842	1240	893	1189	na	na	na	na	na	na	na	na	na	na	1739	2354	517	674	594	494	651	765	649	620	na	na	na	na	na	na	na	na	na
E80M	864	1268	445	373	330	530	331	730	350	453	609	603	199	269	323	310	407	243	487	547	na	na	na	na	na	na	na	na	na	na	797	1039	228	257	254	226	293	301	290	284	na	na	na	na	na	na	na	na	na
E80N	81	104	50	34	63	63	52	79	26	32	56	49	21	42	38	33	34	36	48	64	na	na	na	na	na	na	na	na	na	na	106	160	42	31	37	34	46	53	46	26	na	na	na	na	na	na	na	na	na
E80P	356	455	129	135	131	209	134	204	163	180	325	189	167	92	100	220	114	383	151	236	na	na	na	na	na	na	na	na	na	na	270	370	102	127	110	90	119	124	116	136	na	na	na	na	na	na	na	na	na
E80Q	406	546	234	126	201	177	130	206	143	136	223	310	205	95	105	339	142	161	149	160	na	na	na	na	na	na	na	na	na	na	418	570	107	152	116	97	159	117	152	158	na	na	na	na	na	na	na	na	na
E80R	1790	2	993	714	967	834	636	1306	546	915	1	1406	606	554	605	961	711	598	826	1012	na	na	na	na	na	na	na	na	na	na	1679	2159	489	620	527	462	575	560	582	534	na	na	na	na	na	na	na	na	na
E80S	508	769	387	191	304	286	190	262	180	269	356	391	216	173	182	346	262	204	233	262	na	na	na	na	na	na	na	na	na	na	522	704	246	210	172	147	244	252	238	220	na	na	na	na	na	na	na	na	na
E80T	481	676	286	131	190	258	205	345	162	299	515	380	92	104	122	200	181	169	279	323	na	na	na	na	na	na	na	na	na	na	408	637	180	176	185	122	227	196	179	186	na	na	na	na	na	na	na	na	na
E80V	2	1879	793	534	640	462	497	758	473	791	5	827	311	331	869	716	731	429	742	979	na	na	na	na	na	na	na	na	na	na	1137	1615	337	458	354	302	445	492	562	612	na	na	na	na	na	na	na	na	na
E80W	795	923	404	327	583	282	224	565	279	381	448	535	244	166	369	557	265	235	324	318	na	na	na	na	na	na	na	na	na	na	769	846	265	217	183	181	236	269	258	147	na	na	na	na	na	na	na	na	na
E80Y	88	112	46	31	49	12	17	77	15	44	108	51	19	27	34	20	28	38	40	194	na	na	na	na	na	na	na	na	na	na	136	144	16	37	34	25	40	22	46	35	na	na	na	na	na	na	na	na	na
E90*	na	na	na	na	na	na	na	na	na	na	na	na	na	na	na	na	na	na	na	na	101	9	6	na	2	4	2	na	na	5	na	na	na	na	na	na	na	na	na	na	157	98	11	21	8	9	10	9	17
E90A	na	na	na	na	na	na	na	na	na	na	na	na	na	na	na	na	na	na	na	na	404	345	513	257	289	327	212	237	627	378	na	na	na	na	na	na	na	na	na	na	1097	1136	439	363	512	481	395	529	471
E90C	na	na	na	na	na	na	na	na	na	na	na	na	na	na	na	na	na	na	na	na	50	66	81	34	48	99	44	77	211	83	na	na	na	na	na	na	na	na	na	na	202	242	81	89	74	122	81	130	124
E90D	na	na	na	na	na	na	na	na	na	na	na	na	na	na	na	na	na	na	na	na	147	228	160	126	108	119	119	158	337	209	na	na	na	na	na	na	na	na	na	na	542	405	141	241	256	299	218	293	195
E90F	na	na	na	na	na	na	na	na	na	na	na	na	na	na	na	na	na	na	na	na	61	117	74	50	52	73	64	63	124	77	na	na	na	na	na	na	na	na	na	na	291	201	114	99	104	99	85	109	97
E90G	na	na	na	na	na	na	na	na	na	na	na	na	na	na	na	na	na	na	na	na	4758	2780	2805	1517	1407	1839	1421	1278	3149	2351	na	na	na	na	na	na	na	na	na	na	9462	9531	3259	3068	3479	3778	2652	3725	2873
E90H	na	na	na	na	na	na	na	na	na	na	na	na	na	na	na	na	na	na	na	na	90	95	202	55	47	91	74	79	212	132	na	na	na	na	na	na	na	na	na	na	227	226	138	146	167	142	138	198	176
E90I	na	na	na	na	na	na	na	na	na	na	na	na	na	na	na	na	na	na	na	na	187	131	135	90	101	119	128	58	163	157	na	na	na	na	na	na	na	na	na	na	393	436	154	152	179	183	139	149	183
E90K	na	na	na	na	na	na	na	na	na	na	na	na	na	na	na	na	na	na	na	na	278	371	286	132	128	196	116	68	189	172	na	na	na	na	na	na	na	na	na	na	1088	1388	304	258	261	213	162	169	173
E90L	na	na	na	na	na	na	na	na	na	na	na	na	na	na	na	na	na	na	na	na	443	401	597	211	307	220	133	120	306	222	na	na	na	na	na	na	na	na	na	na	1470	956	407	338	434	369	268	310	272
E90M	na	na	na	na	na	na	na	na	na	na	na	na	na	na	na	na	na	na	na	na	322	471	430	246	186	231	222	182	430	317	na	na	na	na	na	na	na	na	na	na	1411	1483	514	567	601	462	410	508	354
E90N	na	na	na	na	na	na	na	na	na	na	na	na	na	na	na	na	na	na	na	na	59	87	120	66	111	65	76	56	145	91	na	na	na	na	na	na	na	na	na	na	298	186	111	108	136	142	143	170	144
E90P	na	na	na	na	na	na	na	na	na	na	na	na	na	na	na	na	na	na	na	na	92	8	27	12	na	na	na	2	na	na	na	na	na	na	na	na	na	na	na	na	125	19	9	9	4	na	5	16	4
E90Q	na	na	na	na	na	na	na	na	na	na	na	na	na	na	na	na	na	na	na	na	72	88	65	65	43	49	64	42	150	70	na	na	na	na	na	na	na	na	na	na	201	217	103	106	135	68	89	85	58
E90R	na	na	na	na	na	na	na	na	na	na	na	na	na	na	na	na	na	na	na	na	660	561	493	311	232	321	194	212	593	327	na	na	na	na	na	na	na	na	na	na	2103	1830	522	540	556	507	389	492	408
E90S	na	na	na	na	na	na	na	na	na	na	na	na	na	na	na	na	na	na	na	na	251	380	423	150	163	176	220	180	478	378	na	na	na	na	na	na	na	na	na	na	748	983	337	316	398	421	361	525	450
E90T	na	na	na	na	na	na	na	na	na	na	na	na	na	na	na	na	na	na	na	na	193	242	175	113	108	79	82	75	181	116	na	na	na	na	na	na	na	na	na	na	498	597	219	175	167	220	146	223	172
E90V	na	na	na	na	na	na	na	na	na	na	na	na	na	na	na	na	na	na	na	na	812	948	799	401	503	607	361	430	896	613	na	na	na	na	na	na	na	na	na	na	2983	2705	873	901	1032	949	758	957	617
E90W	na	na	na	na	na	na	na	na	na	na	na	na	na	na	na	na	na	na	na	na	298	283	337	149	155	196	134	169	338	254	na	na	na	na	na	na	na	na	na	na	1061	857	353	308	388	427	250	321	294
E90Y	na	na	na	na	na	na	na	na	na	na	na	na	na	na	na	na	na	na	na	na	105	183	69	50	178	77	70	46	154	102	na	na	na	na	na	na	na	na	na	na	269	318	105	140	95	135	103	114	95
F103*	na	na	na	na	na	na	na	na	na	na	na	na	na	na	na	na	na	na	na	na	158	9	3	3	2	6	na	na	na	4	na	na	na	na	na	na	na	na	na	na	275	90	25	15	5	12	10	12	9
F103A	na	na	na	na	na	na	na	na	na	na	na	na	na	na	na	na	na	na	na	na	625	1187	893	646	605	783	867	1142	2861	1673	na	na	na	na	na	na	na	na	na	na	2031	2884	924	1265	1560	1763	1719	2966	2933
F103C	na	na	na	na	na	na	na	na	na	na	na	na	na	na	na	na	na	na	na	na	114	195	175	90	97	106	111	180	345	197	na	na	na	na	na	na	na	na	na	na	433	506	167	216	268	273	209	325	338
F103D	na	na	na	na	na	na	na	na	na	na	na	na	na	na	na	na	na	na	na	na	123	10	9	na	2	3	2	na	na	4	na	na	na	na	na	na	na	na	na	na	172	47	15	25	5	6	9	6	8
F103E	na	na	na	na	na	na	na	na	na	na	na	na	na	na	na	na	na	na	na	na	381	45	38	16	19	9	2	18	14	9	na	na	na	na	na	na	na	na	na	na	905	278	187	28	25	28	34	39	27
F103G	na	na	na	na	na	na	na	na	na	na	na	na	na	na	na	na	na	na	na	na	1389	1138	1127	571	786	720	484	834	1453	1119	na	na	na	na	na	na	na	na	na	na	5114	3939	1747	1450	1920	1579	1286	2035	1750
F103H	na	na	na	na	na	na	na	na	na	na	na	na	na	na	na	na	na	na	na	na	503	360	444	277	198	210	155	238	507	350	na	na	na	na	na	na	na	na	na	na	966	766	309	364	371	328	324	443	448
F103I	na	na	na	na	na	na	na	na	na	na	na	na	na	na	na	na	na	na	na	na	270	320	262	154	191	251	205	242	534	343	na	na	na	na	na	na	na	na	na	na	837	832	309	291	360	390	292	431	238
F103K	na	na	na	na	na	na	na	na	na	na	na	na	na	na	na	na	na	na	na	na	390	21	19	12	8	5	5	3	7	8	na	na	na	na	na	na	na	na	na	na	677	118	37	44	14	30	30	21	64
F103L	na	na	na	na	na	na	na	na	na	na	na	na	na	na	na	na	na	na	na	na	927	1293	875	516	531	614	599	383	963	691	na	na	na	na	na	na	na	na	na	na	2832	3576	968	912	1173	1043	922	1058	743
F103M	na	na	na	na	na	na	na	na	na	na	na	na	na	na	na	na	na	na	na	na	415	568	564	272	216	306	288	247	610	421	na	na	na	na	na	na	na	na	na	na	1497	1518	616	658	689	778	619	740	501
F103N	na	na	na	na	na	na	na	na	na	na	na	na	na	na	na	na	na	na	na	na	520	379	236	122	93	168	72	148	199	148	na	na	na	na	na	na	na	na	na	na	1415	812	287	222	230	245	119	229	172
F103P	na	na	na	na	na	na	na	na	na	na	na	na	na	na	na	na	na	na	na	na	658	36	28	12	15	9	10	14	18	10	na	na	na	na	na	na	na	na	na	na	695	203	66	38	25	55	16	40	36
F103Q	na	na	na	na	na	na	na	na	na	na	na	na	na	na	na	na	na	na	na	na	400	75	90	32	24	25	17	19	18	7	na	na	na	na	na	na	na	na	na	na	595	233	73	29	28	26	7	15	na
F103R	na	na	na	na	na	na	na	na	na	na	na	na	na	na	na	na	na	na	na	na	414	8	15	7	5	4	na	na	7	5	na	na	na	na	na	na	na	na	na	na	572	174	57	37	21	9	15	18	16
F103S	na	na	na	na	na	na	na	na	na	na	na	na	na	na	na	na	na	na	na	na	544	805	695	376	402	524	563	593	1590	889	na	na	na	na	na	na	na	na	na	na	1502	2071	674	883	1039	1065	1091	1625	1712
F103T	na	na	na	na	na	na	na	na	na	na	na	na	na	na	na	na	na	na	na	na	906	1168	1360	585	673	776	879	923	1857	1271	na	na	na	na	na	na	na	na	na	na	1959	2161	918	1092	1492	1388	1363	1909	1676
F103V	na	na	na	na	na	na	na	na	na	na	na	na	na	na	na	na	na	na	na	na	1370	1440	1610	887	918	1147	1072	1035	2730	1625	na	na	na	na	na	na	na	na	na	na	4239	5179	1671	1923	2346	2579	2173	3002	2558
F103W	na	na	na	na	na	na	na	na	na	na	na	na	na	na	na	na	na	na	na	na	397	464	438	268	240	246	282	265	745	356	na	na	na	na	na	na	na	na	na	na	1361	1378	500	546	758	734	632	671	508
F103Y	na	na	na	na	na	na	na	na	na	na	na	na	na	na	na	na	na	na	na	na	217	272	155	61	89	52	74	23	53	43	na	na	na	na	na	na	na	na	na	na	704	948	131	135	131	121	60	70	30
F125*	na	na	na	na	na	na	na	na	na	na	na	na	na	na	na	na	na	na	na	na	na	na	na	na	na	na	na	na	na	na	81	11	4	2	1	6	2	3	3	4	94	17	16	14	10	6	na	24	4
F125A	na	na	na	na	na	na	na	na	na	na	na	na	na	na	na	na	na	na	na	na	na	na	na	na	na	na	na	na	na	na	255	209	101	89	74	76	81	72	117	98	5	17	212	196	267	249	235	273	168
F125C	na	na	na	na	na	na	na	na	na	na	na	na	na	na	na	na	na	na	na	na	na	na	na	na	na	na	na	na	na	na	186	192	54	80	71	49	91	104	98	91	523	415	164	266	212	228	158	277	184
F125D	na	na	na	na	na	na	na	na	na	na	na	na	na	na	na	na	na	na	na	na	na	na	na	na	na	na	na	na	na	na	58	4	1	3	na	3	na	4	na	na	116	18	3	na	5	6	na	na	na
F125E	na	na	na	na	na	na	na	na	na	na	na	na	na	na	na	na	na	na	na	na	na	na	na	na	na	na	na	na	na	na	164	28	12	5	3	5	5	4	na	6	233	55	22	10	12	13	9	8	na
F125G	na	na	na	na	na	na	na	na	na	na	na	na	na	na	na	na	na	na	na	na	na	na	na	na	na	na	na	na	na	na	1094	910	346	481	427	368	539	683	684	770	2670	2284	1200	1143	1559	1808	1094	1685	1442
F125H	na	na	na	na	na	na	na	na	na	na	na	na	na	na	na	na	na	na	na	na	na	na	na	na	na	na	na	na	na	na	321	178	73	87	77	70	76	63	85	46	709	484	275	198	227	224	119	165	96
F125I	na	na	na	na	na	na	na	na	na	na	na	na	na	na	na	na	na	na	na	na	na	na	na	na	na	na	na	na	na	na	313	428	141	141	89	126	145	232	216	219	786	800	389	405	402	489	413	649	544
F125K	na	na	na	na	na	na	na	na	na	na	na	na	na	na	na	na	na	na	na	na	na	na	na	na	na	na	na	na	na	na	290	40	8	18	13	10	9	7	4	7	4	127	46	39	8	19	17	11	na
F125L	na	na	na	na	na	na	na	na	na	na	na	na	na	na	na	na	na	na	na	na	na	na	na	na	na	na	na	na	na	na	2	2938	669	1002	924	826	1374	1578	1780	2062	3975	5228	2279	2871	3481	3538	3502	5554	4795
F125M	na	na	na	na	na	na	na	na	na	na	na	na	na	na	na	na	na	na	na	na	na	na	na	na	na	na	na	na	na	na	421	807	237	275	248	244	364	460	543	731	986	1354	637	802	966	887	988	1600	1406
F125N	na	na	na	na	na	na	na	na	na	na	na	na	na	na	na	na	na	na	na	na	na	na	na	na	na	na	na	na	na	na	175	57	21	14	4	5	10	11	na	4	431	121	59	39	20	22	16	21	11
F125P	na	na	na	na	na	na	na	na	na	na	na	na	na	na	na	na	na	na	na	na	na	na	na	na	na	na	na	na	na	na	640	132	25	25	20	19	23	25	15	13	803	185	71	87	51	38	37	46	24
F125Q	na	na	na	na	na	na	na	na	na	na	na	na	na	na	na	na	na	na	na	na	na	na	na	na	na	na	na	na	na	na	109	13	8	8	2	5	5	7	3	4	138	30	15	13	14	10	4	8	na
F125R	na	na	na	na	na	na	na	na	na	na	na	na	na	na	na	na	na	na	na	na	na	na	na	na	na	na	na	na	na	na	387	52	27	17	16	9	5	6	9	4	430	131	46	29	21	27	16	16	na
F125S	na	na	na	na	na	na	na	na	na	na	na	na	na	na	na	na	na	na	na	na	na	na	na	na	na	na	na	na	na	na	701	214	71	62	47	44	29	25	39	30	3	3	178	99	66	84	45	54	61
F125T	na	na	na	na	na	na	na	na	na	na	na	na	na	na	na	na	na	na	na	na	na	na	na	na	na	na	na	na	na	na	516	297	84	42	28	21	17	13	14	13	860	374	102	59	55	32	38	30	25
F125V	na	na	na	na	na	na	na	na	na	na	na	na	na	na	na	na	na	na	na	na	na	na	na	na	na	na	na	na	na	na	691	477	152	158	140	106	103	74	119	52	1648	990	434	335	283	282	313	153	94
F125W	na	na	na	na	na	na	na	na	na	na	na	na	na	na	na	na	na	na	na	na	na	na	na	na	na	na	na	na	na	na	249	238	206	154	127	102	214	218	242	297	613	706	376	325	450	420	436	636	602
F125Y	na	na	na	na	na	na	na	na	na	na	na	na	na	na	na	na	na	na	na	na	na	na	na	na	na	na	na	na	na	na	118	161	27	26	56	42	14	14	21	8	408	366	125	78	103	76	89	93	27
F137*	na	na	na	na	na	na	na	na	na	na	na	na	na	na	na	na	na	na	na	na	na	na	na	na	na	na	na	na	na	na	150	29	1	9	7	na	4	2	2	3	175	46	18	11	19	9	6	na	5
F137A	na	na	na	na	na	na	na	na	na	na	na	na	na	na	na	na	na	na	na	na	na	na	na	na	na	na	na	na	na	na	277	263	97	114	102	109	168	197	183	201	716	672	291	355	447	400	419	490	429
F137C	na	na	na	na	na	na	na	na	na	na	na	na	na	na	na	na	na	na	na	na	na	na	na	na	na	na	na	na	na	na	73	62	25	21	14	18	33	30	48	27	167	222	50	61	86	96	88	154	124
F137D	na	na	na	na	na	na	na	na	na	na	na	na	na	na	na	na	na	na	na	na	na	na	na	na	na	na	na	na	na	na	247	231	74	103	89	72	103	115	127	154	580	645	286	218	330	282	299	350	364
F137E	na	na	na	na	na	na	na	na	na	na	na	na	na	na	na	na	na	na	na	na	na	na	na	na	na	na	na	na	na	na	679	797	207	294	243	222	342	383	406	387	1602	1814	689	803	943	821	874	1231	1251
F137G	na	na	na	na	na	na	na	na	na	na	na	na	na	na	na	na	na	na	na	na	na	na	na	na	na	na	na	na	na	na	1281	1560	438	542	457	320	581	728	688	572	6	15	1296	1468	1707	1580	1424	2160	1654
F137H	na	na	na	na	na	na	na	na	na	na	na	na	na	na	na	na	na	na	na	na	na	na	na	na	na	na	na	na	na	na	277	432	108	127	155	119	207	200	201	164	736	853	391	405	486	429	476	654	529
F137I	na	na	na	na	na	na	na	na	na	na	na	na	na	na	na	na	na	na	na	na	na	na	na	na	na	na	na	na	na	na	145	239	60	67	97	72	98	202	207	201	489	562	163	276	326	223	275	489	481
F137K	na	na	na	na	na	na	na	na	na	na	na	na	na	na	na	na	na	na	na	na	na	na	na	na	na	na	na	na	na	na	875	1269	444	446	414	311	477	664	636	641	2106	2632	1013	1205	1435	1506	1321	2041	1597
F137L	na	na	na	na	na	na	na	na	na	na	na	na	na	na	na	na	na	na	na	na	na	na	na	na	na	na	na	na	na	na	627	850	392	330	339	273	474	624	631	692	1805	2130	740	1005	1166	1209	1235	1580	1467
F137M	na	na	na	na	na	na	na	na	na	na	na	na	na	na	na	na	na	na	na	na	na	na	na	na	na	na	na	na	na	na	268	305	114	149	148	116	191	234	240	253	696	905	418	417	507	458	438	654	500
F137N	na	na	na	na	na	na	na	na	na	na	na	na	na	na	na	na	na	na	na	na	na	na	na	na	na	na	na	na	na	na	2	888	266	324	275	236	453	386	434	582	1520	1747	673	788	976	958	934	1318	1291
F137P	na	na	na	na	na	na	na	na	na	na	na	na	na	na	na	na	na	na	na	na	na	na	na	na	na	na	na	na	na	na	594	309	113	121	73	65	67	106	88	109	1568	867	330	220	222	290	136	240	188
F137Q	na	na	na	na	na	na	na	na	na	na	na	na	na	na	na	na	na	na	na	na	na	na	na	na	na	na	na	na	na	na	253	259	125	117	112	97	171	143	164	186	664	709	327	343	374	509	416	495	457
F137R	na	na	na	na	na	na	na	na	na	na	na	na	na	na	na	na	na	na	na	na	na	na	na	na	na	na	na	na	na	na	598	931	206	249	246	240	418	383	452	445	1217	1568	700	759	977	836	1003	1261	1114
F137S	na	na	na	na	na	na	na	na	na	na	na	na	na	na	na	na	na	na	na	na	na	na	na	na	na	na	na	na	na	na	450	678	148	184	184	158	278	331	348	354	1023	1292	446	522	713	808	590	965	864
F137T	na	na	na	na	na	na	na	na	na	na	na	na	na	na	na	na	na	na	na	na	na	na	na	na	na	na	na	na	na	na	412	676	201	221	193	162	290	318	349	376	4	1243	446	621	709	766	732	1069	922
F137V	na	na	na	na	na	na	na	na	na	na	na	na	na	na	na	na	na	na	na	na	na	na	na	na	na	na	na	na	na	na	640	1085	284	408	392	321	481	730	638	729	1469	2141	773	1070	1174	1211	1135	1750	1467
F137W	na	na	na	na	na	na	na	na	na	na	na	na	na	na	na	na	na	na	na	na	na	na	na	na	na	na	na	na	na	na	310	400	94	88	99	95	118	128	120	118	718	733	280	286	353	352	348	367	291
F137Y	na	na	na	na	na	na	na	na	na	na	na	na	na	na	na	na	na	na	na	na	na	na	na	na	na	na	na	na	na	na	182	306	36	33	31	67	31	45	50	11	383	419	102	86	128	148	58	150	85
F140*	na	na	na	na	na	na	na	na	na	na	na	na	na	na	na	na	na	na	na	na	na	na	na	na	na	na	na	na	na	na	77	23	5	3	4	2	na	na	na	na	97	29	8	9	na	na	na	na	6
F140A	na	na	na	na	na	na	na	na	na	na	na	na	na	na	na	na	na	na	na	na	na	na	na	na	na	na	na	na	na	na	271	412	168	175	148	159	296	338	331	358	738	941	458	594	641	608	727	1000	899
F140C	na	na	na	na	na	na	na	na	na	na	na	na	na	na	na	na	na	na	na	na	na	na	na	na	na	na	na	na	na	na	52	53	34	33	19	21	61	43	55	52	110	207	61	92	115	400	93	148	112
F140D	na	na	na	na	na	na	na	na	na	na	na	na	na	na	na	na	na	na	na	na	na	na	na	na	na	na	na	na	na	na	163	255	140	113	125	125	172	211	265	302	364	635	308	398	439	592	464	698	610
F140E	na	na	na	na	na	na	na	na	na	na	na	na	na	na	na	na	na	na	na	na	na	na	na	na	na	na	na	na	na	na	263	405	173	190	183	117	211	316	311	370	3	879	337	521	680	726	661	901	862
F140G	na	na	na	na	na	na	na	na	na	na	na	na	na	na	na	na	na	na	na	na	na	na	na	na	na	na	na	na	na	na	388	750	225	320	302	254	409	471	539	615	960	1528	583	988	1094	1087	1055	1434	1226
F140H	na	na	na	na	na	na	na	na	na	na	na	na	na	na	na	na	na	na	na	na	na	na	na	na	na	na	na	na	na	na	209	183	76	91	82	62	110	117	125	94	508	528	210	223	247	253	261	354	300
F140I	na	na	na	na	na	na	na	na	na	na	na	na	na	na	na	na	na	na	na	na	na	na	na	na	na	na	na	na	na	na	210	319	173	140	170	130	238	248	310	343	407	738	277	373	503	537	463	751	680
F140K	na	na	na	na	na	na	na	na	na	na	na	na	na	na	na	na	na	na	na	na	na	na	na	na	na	na	na	na	na	na	239	409	200	189	172	159	284	335	370	433	594	999	635	585	640	689	691	1037	942
F140L	na	na	na	na	na	na	na	na	na	na	na	na	na	na	na	na	na	na	na	na	na	na	na	na	na	na	na	na	na	na	380	679	187	311	296	223	469	614	575	624	3	1594	566	824	935	1075	1076	1501	1428
F140M	na	na	na	na	na	na	na	na	na	na	na	na	na	na	na	na	na	na	na	na	na	na	na	na	na	na	na	na	na	na	333	661	170	184	166	146	249	356	346	439	858	1066	479	477	679	570	649	940	790
F140N	na	na	na	na	na	na	na	na	na	na	na	na	na	na	na	na	na	na	na	na	na	na	na	na	na	na	na	na	na	na	428	867	239	370	270	289	410	583	602	730	990	1524	671	911	1011	1200	1034	1573	1639
F140P	na	na	na	na	na	na	na	na	na	na	na	na	na	na	na	na	na	na	na	na	na	na	na	na	na	na	na	na	na	na	855	1576	483	669	657	542	910	1174	1174	1354	2179	3357	1526	1833	2270	2281	2365	3721	2791
F140Q	na	na	na	na	na	na	na	na	na	na	na	na	na	na	na	na	na	na	na	na	na	na	na	na	na	na	na	na	na	na	67	121	34	46	43	35	53	59	72	71	163	183	79	113	103	121	140	289	207
F140R	na	na	na	na	na	na	na	na	na	na	na	na	na	na	na	na	na	na	na	na	na	na	na	na	na	na	na	na	na	na	295	396	189	190	182	172	235	306	403	432	15	958	416	594	660	675	726	1007	894
F140S	na	na	na	na	na	na	na	na	na	na	na	na	na	na	na	na	na	na	na	na	na	na	na	na	na	na	na	na	na	na	333	499	184	317	266	249	402	624	517	445	881	1416	561	672	778	961	897	1486	1121
F140T	na	na	na	na	na	na	na	na	na	na	na	na	na	na	na	na	na	na	na	na	na	na	na	na	na	na	na	na	na	na	629	1381	378	470	401	409	675	952	914	1018	3	13	867	1351	1516	1588	1576	2478	2023
F140V	na	na	na	na	na	na	na	na	na	na	na	na	na	na	na	na	na	na	na	na	na	na	na	na	na	na	na	na	na	na	633	1403	397	482	449	405	607	858	898	1030	3	2512	1046	1266	1520	1896	1650	2542	2337
F140W	na	na	na	na	na	na	na	na	na	na	na	na	na	na	na	na	na	na	na	na	na	na	na	na	na	na	na	na	na	na	68	65	35	38	34	23	62	43	56	50	195	184	81	117	130	134	101	196	118
F140Y	na	na	na	na	na	na	na	na	na	na	na	na	na	na	na	na	na	na	na	na	na	na	na	na	na	na	na	na	na	na	64	156	27	25	25	19	46	36	10	16	163	200	8	58	37	49	39	79	95
F153*	na	na	na	na	na	na	na	na	na	na	na	na	na	na	na	na	na	na	na	na	na	na	na	na	na	na	na	na	na	na	113	8	3	11	5	2	na	2	na	na	185	65	14	7	6	9	5	8	8
F153A	na	na	na	na	na	na	na	na	na	na	na	na	na	na	na	na	na	na	na	na	na	na	na	na	na	na	na	na	na	na	147	174	42	65	56	50	57	62	71	48	352	436	158	146	140	113	106	109	151
F153C	na	na	na	na	na	na	na	na	na	na	na	na	na	na	na	na	na	na	na	na	na	na	na	na	na	na	na	na	na	na	97	87	28	42	45	49	65	67	77	113	229	244	80	132	147	147	152	199	126
F153D	na	na	na	na	na	na	na	na	na	na	na	na	na	na	na	na	na	na	na	na	na	na	na	na	na	na	na	na	na	na	137	36	11	22	18	6	4	7	2	7	239	139	39	25	54	66	11	11	na
F153E	na	na	na	na	na	na	na	na	na	na	na	na	na	na	na	na	na	na	na	na	na	na	na	na	na	na	na	na	na	na	400	413	106	109	82	73	113	77	114	95	1032	709	246	243	257	229	188	242	181
F153G	na	na	na	na	na	na	na	na	na	na	na	na	na	na	na	na	na	na	na	na	na	na	na	na	na	na	na	na	na	na	663	203	126	91	62	38	84	53	42	76	1599	732	203	109	106	141	57	109	109
F153H	na	na	na	na	na	na	na	na	na	na	na	na	na	na	na	na	na	na	na	na	na	na	na	na	na	na	na	na	na	na	202	283	84	85	75	66	75	109	92	123	615	529	238	201	252	184	205	222	191
F153I	na	na	na	na	na	na	na	na	na	na	na	na	na	na	na	na	na	na	na	na	na	na	na	na	na	na	na	na	na	na	190	228	59	89	82	84	100	118	125	109	452	555	205	242	211	198	240	349	269
F153K	na	na	na	na	na	na	na	na	na	na	na	na	na	na	na	na	na	na	na	na	na	na	na	na	na	na	na	na	na	na	733	824	274	303	253	211	340	348	363	316	1772	1920	810	631	750	618	558	773	642
F153L	na	na	na	na	na	na	na	na	na	na	na	na	na	na	na	na	na	na	na	na	na	na	na	na	na	na	na	na	na	na	879	1391	484	534	484	406	607	801	835	932	2309	4	979	1231	1379	1488	1578	2275	2088
F153M	na	na	na	na	na	na	na	na	na	na	na	na	na	na	na	na	na	na	na	na	na	na	na	na	na	na	na	na	na	na	273	352	104	110	116	95	188	203	210	189	662	81	274	270	437	385	384	604	441
F153N	na	na	na	na	na	na	na	na	na	na	na	na	na	na	na	na	na	na	na	na	na	na	na	na	na	na	na	na	na	na	424	496	140	145	150	119	158	172	170	155	950	974	340	354	379	361	345	431	343
F153P	na	na	na	na	na	na	na	na	na	na	na	na	na	na	na	na	na	na	na	na	na	na	na	na	na	na	na	na	na	na	495	162	37	43	46	18	30	22	18	10	989	441	138	43	56	68	39	27	20
F153Q	na	na	na	na	na	na	na	na	na	na	na	na	na	na	na	na	na	na	na	na	na	na	na	na	na	na	na	na	na	na	210	237	77	72	72	53	58	43	67	44	539	395	174	158	190	128	144	170	115
F153R	na	na	na	na	na	na	na	na	na	na	na	na	na	na	na	na	na	na	na	na	na	na	na	na	na	na	na	na	na	na	656	577	165	189	136	144	189	120	180	134	1606	1307	447	489	392	716	314	404	316
F153S	na	na	na	na	na	na	na	na	na	na	na	na	na	na	na	na	na	na	na	na	na	na	na	na	na	na	na	na	na	na	352	368	136	148	132	138	185	128	184	172	892	914	322	371	422	365	307	463	352
F153T	na	na	na	na	na	na	na	na	na	na	na	na	na	na	na	na	na	na	na	na	na	na	na	na	na	na	na	na	na	na	370	595	184	194	189	132	207	258	261	265	4	1141	389	415	525	624	471	768	554
F153V	na	na	na	na	na	na	na	na	na	na	na	na	na	na	na	na	na	na	na	na	na	na	na	na	na	na	na	na	na	na	716	902	323	318	274	246	390	365	405	382	6	18	711	716	863	797	741	1088	753
F153W	na	na	na	na	na	na	na	na	na	na	na	na	na	na	na	na	na	na	na	na	na	na	na	na	na	na	na	na	na	na	341	257	79	91	102	71	78	65	101	80	692	808	232	235	212	230	198	285	109
F153Y	na	na	na	na	na	na	na	na	na	na	na	na	na	na	na	na	na	na	na	na	na	na	na	na	na	na	na	na	na	na	194	95	42	56	70	54	50	65	71	56	409	399	140	153	176	156	131	131	105
F31*	265	46	16	2	12	19	na	12	4	14	248	57	21	7	13	2	3	na	4	na	324	64	18	5	9	19	6	3	na	3	na	na	na	na	na	na	na	na	na	na	na	na	na	na	na	na	na	na	na
F31A	897	366	135	41	25	7	14	22	na	4	819	334	112	60	311	69	11	19	19	6	808	194	96	63	26	33	19	12	18	12	na	na	na	na	na	na	na	na	na	na	na	na	na	na	na	na	na	na	na
F31C	525	522	106	41	54	30	42	18	9	14	198	368	80	81	34	118	39	17	39	36	4	269	144	71	53	90	47	42	69	55	na	na	na	na	na	na	na	na	na	na	na	na	na	na	na	na	na	na	na
F31D	193	61	22	na	15	7	2	9	na	na	249	35	17	7	6	na	na	3	na	na	241	26	10	6	2	5	4	na	5	3	na	na	na	na	na	na	na	na	na	na	na	na	na	na	na	na	na	na	na
F31E	849	291	102	43	40	9	10	34	13	na	531	281	990	60	116	35	4	18	17	9	1	246	114	48	22	27	14	83	8	19	na	na	na	na	na	na	na	na	na	na	na	na	na	na	na	na	na	na	na
F31G	701	139	38	26	6	18	12	na	9	10	692	169	76	21	13	171	3	8	12	19	797	70	51	24	9	16	8	10	22	9	na	na	na	na	na	na	na	na	na	na	na	na	na	na	na	na	na	na	na
F31H	433	287	100	36	9	53	8	66	10	7	317	246	103	110	35	26	4	15	23	na	407	321	80	51	24	27	20	5	15	8	na	na	na	na	na	na	na	na	na	na	na	na	na	na	na	na	na	na	na
F31I	432	248	84	17	50	na	2	na	15	3	199	3	29	38	30	91	2	10	10	11	2	1	62	38	22	11	19	2	9	18	na	na	na	na	na	na	na	na	na	na	na	na	na	na	na	na	na	na	na
F31K	330	38	33	4	24	na	5	na	7	na	418	47	10	11	2	na	na	na	3	2	453	31	30	7	6	3	na	2	na	7	na	na	na	na	na	na	na	na	na	na	na	na	na	na	na	na	na	na	na
F31L	2925	3119	877	425	452	856	435	890	344	419	1242	7	644	584	390	1339	882	388	549	1418	11	4	1398	717	639	721	535	740	1148	943	na	na	na	na	na	na	na	na	na	na	na	na	na	na	na	na	na	na	na
F31M	930	860	256	156	105	152	97	420	78	180	682	550	176	170	112	208	337	380	177	201	752	636	454	173	189	216	189	176	412	269	na	na	na	na	na	na	na	na	na	na	na	na	na	na	na	na	na	na	na
F31N	200	40	12	3	7	18	1	10	na	7	178	25	7	4	na	17	4	na	3	2	214	17	12	3	na	3	3	6	na	7	na	na	na	na	na	na	na	na	na	na	na	na	na	na	na	na	na	na	na
F31P	659	134	48	34	20	9	5	16	7	41	510	88	15	25	22	4	6	4	7	23	686	43	33	23	16	9	16	2	12	12	na	na	na	na	na	na	na	na	na	na	na	na	na	na	na	na	na	na	na
F31Q	363	108	32	13	10	11	na	na	na	19	175	144	63	14	6	na	3	16	4	8	430	41	28	9	36	4	2	na	8	na	na	na	na	na	na	na	na	na	na	na	na	na	na	na	na	na	na	na	na
F31R	716	117	45	70	33	8	16	15	12	na	590	100	25	13	20	18	10	2	7	6	832	56	32	21	18	13	9	3	4	5	na	na	na	na	na	na	na	na	na	na	na	na	na	na	na	na	na	na	na
F31S	538	94	42	36	238	9	11	34	na	5	356	136	92	76	43	12	10	7	12	15	3	1	25	17	14	21	29	3	5	12	na	na	na	na	na	na	na	na	na	na	na	na	na	na	na	na	na	na	na
F31T	763	416	161	50	60	16	5	30	na	6	528	318	62	52	13	34	36	13	6	12	638	320	131	50	50	32	12	na	11	16	na	na	na	na	na	na	na	na	na	na	na	na	na	na	na	na	na	na	na
F31V	1881	1567	471	130	258	242	130	148	114	50	938	1185	245	575	174	200	92	257	129	109	5	1151	603	308	267	251	154	121	192	202	na	na	na	na	na	na	na	na	na	na	na	na	na	na	na	na	na	na	na
F31W	313	135	8	9	6	na	na	na	4	2	277	55	20	4	18	na	6	na	5	na	326	30	18	5	2	5	47	4	6	4	na	na	na	na	na	na	na	na	na	na	na	na	na	na	na	na	na	na	na
F31Y	634	782	246	198	203	168	150	255	146	265	307	2	156	98	115	345	163	102	175	250	2	1	289	175	218	213	238	176	538	401	na	na	na	na	na	na	na	na	na	na	na	na	na	na	na	na	na	na	na
G121*	na	na	na	na	na	na	na	na	na	na	na	na	na	na	na	na	na	na	na	na	na	na	na	na	na	na	na	na	na	na	221	40	12	7	7	3	6	2	5	2	274	80	33	29	14	11	5	25	7
G121A	na	na	na	na	na	na	na	na	na	na	na	na	na	na	na	na	na	na	na	na	na	na	na	na	na	na	na	na	na	na	567	865	256	264	149	118	142	86	141	70	1428	1540	716	693	474	486	268	307	120
G121C	na	na	na	na	na	na	na	na	na	na	na	na	na	na	na	na	na	na	na	na	na	na	na	na	na	na	na	na	na	na	6	9	1	na	1	1	na	na	na	na	3	3	na	3	na	na	na	na	na
G121D	na	na	na	na	na	na	na	na	na	na	na	na	na	na	na	na	na	na	na	na	na	na	na	na	na	na	na	na	na	na	61	na	1	na	1	2	na	na	na	na	112	26	na	na	na	na	na	na	na
G121E	na	na	na	na	na	na	na	na	na	na	na	na	na	na	na	na	na	na	na	na	na	na	na	na	na	na	na	na	na	na	484	205	75	59	27	28	17	19	17	6	7	501	180	98	52	84	33	37	13
G121F	na	na	na	na	na	na	na	na	na	na	na	na	na	na	na	na	na	na	na	na	na	na	na	na	na	na	na	na	na	na	93	32	19	21	24	3	4	na	10	na	179	122	56	25	13	34	8	17	9
G121H	na	na	na	na	na	na	na	na	na	na	na	na	na	na	na	na	na	na	na	na	na	na	na	na	na	na	na	na	na	na	130	282	24	26	19	12	14	10	12	5	285	266	79	91	46	17	15	15	na
G121I	na	na	na	na	na	na	na	na	na	na	na	na	na	na	na	na	na	na	na	na	na	na	na	na	na	na	na	na	na	na	132	20	12	9	1	4	na	5	2	na	167	46	27	14	9	15	12	13	8
G121K	na	na	na	na	na	na	na	na	na	na	na	na	na	na	na	na	na	na	na	na	na	na	na	na	na	na	na	na	na	na	774	298	108	113	58	45	36	25	22	6	1381	785	282	120	65	78	55	46	30
G121L	na	na	na	na	na	na	na	na	na	na	na	na	na	na	na	na	na	na	na	na	na	na	na	na	na	na	na	na	na	na	336	50	40	35	18	9	11	6	3	4	4	202	91	57	35	27	22	10	12
G121M	na	na	na	na	na	na	na	na	na	na	na	na	na	na	na	na	na	na	na	na	na	na	na	na	na	na	na	na	na	na	381	198	38	57	32	24	14	5	15	14	710	348	128	70	33	37	14	47	14
G121N	na	na	na	na	na	na	na	na	na	na	na	na	na	na	na	na	na	na	na	na	na	na	na	na	na	na	na	na	na	na	338	173	41	43	15	13	17	9	5	4	610	319	130	54	30	30	19	15	7
G121P	na	na	na	na	na	na	na	na	na	na	na	na	na	na	na	na	na	na	na	na	na	na	na	na	na	na	na	na	na	na	827	666	161	145	77	74	50	38	39	21	1670	1145	442	219	195	187	78	89	56
G121Q	na	na	na	na	na	na	na	na	na	na	na	na	na	na	na	na	na	na	na	na	na	na	na	na	na	na	na	na	na	na	201	171	32	55	31	11	15	15	6	5	464	353	121	67	45	50	24	20	8
G121R	na	na	na	na	na	na	na	na	na	na	na	na	na	na	na	na	na	na	na	na	na	na	na	na	na	na	na	na	na	na	634	377	105	80	51	51	25	39	28	31	3	915	313	130	122	100	62	50	64
G121S	na	na	na	na	na	na	na	na	na	na	na	na	na	na	na	na	na	na	na	na	na	na	na	na	na	na	na	na	na	na	4	367	74	97	58	49	44	34	36	12	1059	751	339	161	111	147	56	69	67
G121T	na	na	na	na	na	na	na	na	na	na	na	na	na	na	na	na	na	na	na	na	na	na	na	na	na	na	na	na	na	na	695	308	87	82	50	26	22	13	28	18	1097	613	217	120	89	132	36	48	26
G121V	na	na	na	na	na	na	na	na	na	na	na	na	na	na	na	na	na	na	na	na	na	na	na	na	na	na	na	na	na	na	678	259	91	119	72	49	39	32	28	43	6	4	3669	1162	816	1031	363	358	155
G121W	na	na	na	na	na	na	na	na	na	na	na	na	na	na	na	na	na	na	na	na	na	na	na	na	na	na	na	na	na	na	336	180	57	67	33	31	29	16	14	10	629	423	165	62	72	52	43	19	23
G121Y	na	na	na	na	na	na	na	na	na	na	na	na	na	na	na	na	na	na	na	na	na	na	na	na	na	na	na	na	na	na	124	93	18	22	15	8	13	9	12	26	240	191	75	35	26	39	25	18	28
G15*	152	31	11	4	8	2	2	8	6	na	174	33	5	10	1	na	2	5	2	na	204	55	47	na	na	3	na	6	na	na	na	na	na	na	na	na	na	na	na	na	na	na	na	na	na	na	na	na	na
G15A	540	513	125	14	19	9	12	12	3	4	316	363	81	52	30	11	8	8	17	15	420	1	138	48	37	45	15	3	14	27	na	na	na	na	na	na	na	na	na	na	na	na	na	na	na	na	na	na	na
G15C	64	4	na	na	na	na	3	na	na	na	45	na	na	14	1	na	na	na	2	na	1	1	na	na	na	na	na	na	na	na	na	na	na	na	na	na	na	na	na	na	na	na	na	na	na	na	na	na	na
G15D	50	2	na	na	na	na	3	na	na	na	70	3	na	6	na	na	2	na	2	2	1	5	na	na	2	na	na	na	na	na	na	na	na	na	na	na	na	na	na	na	na	na	na	na	na	na	na	na	na
G15E	221	83	41	5	39	14	6	2	12	17	231	90	56	21	11	12	6	3	3	5	260	84	22	13	14	8	9	7	5	5	na	na	na	na	na	na	na	na	na	na	na	na	na	na	na	na	na	na	na
G15F	228	59	28	10	4	13	12	5	5	8	195	37	9	14	17	5	10	na	3	na	1	38	16	11	7	4	5	8	na	9	na	na	na	na	na	na	na	na	na	na	na	na	na	na	na	na	na	na	na
G15H	113	43	12	2	3	9	na	na	3	8	98	25	10	15	3	10	na	na	na	17	133	23	7	7	5	3	na	na	8	7	na	na	na	na	na	na	na	na	na	na	na	na	na	na	na	na	na	na	na
G15I	87	55	5	4	8	na	na	na	na	2	50	14	na	2	2	na	na	3	na	na	78	8	7	na	11	5	3	5	na	na	na	na	na	na	na	na	na	na	na	na	na	na	na	na	na	na	na	na	na
G15K	289	120	18	7	5	na	4	na	2	17	373	39	14	13	6	na	3	2	6	na	366	38	22	13	31	14	na	6	14	6	na	na	na	na	na	na	na	na	na	na	na	na	na	na	na	na	na	na	na
G15L	796	173	48	25	100	19	9	15	12	10	560	107	58	86	8	27	na	16	2	10	778	96	44	25	10	9	8	12	11	20	na	na	na	na	na	na	na	na	na	na	na	na	na	na	na	na	na	na	na
G15M	125	32	11	2	4	9	4	na	na	2	165	25	15	3	4	na	na	na	2	na	176	43	3	7	3	6	3	na	na	na	na	na	na	na	na	na	na	na	na	na	na	na	na	na	na	na	na	na	na
G15N	202	64	18	22	10	na	5	5	5	5	206	82	34	7	2	16	5	3	3	na	196	16	41	10	4	4	na	na	4	7	na	na	na	na	na	na	na	na	na	na	na	na	na	na	na	na	na	na	na
G15P	567	134	47	21	31	2	8	27	3	21	486	94	49	21	14	33	8	5	5	na	574	112	30	20	19	14	12	10	16	12	na	na	na	na	na	na	na	na	na	na	na	na	na	na	na	na	na	na	na
G15Q	143	23	18	2	24	11	6	na	3	9	406	57	37	2	8	na	na	na	4	na	179	20	8	3	9	5	na	na	na	na	na	na	na	na	na	na	na	na	na	na	na	na	na	na	na	na	na	na	na
G15R	452	79	33	13	6	13	1	28	5	2	368	2	28	16	6	18	na	na	4	na	557	2	42	14	7	9	23	11	6	6	na	na	na	na	na	na	na	na	na	na	na	na	na	na	na	na	na	na	na
G15S	552	559	142	44	82	22	8	22	3	14	390	6	82	74	840	27	15	200	19	15	3	9	141	63	57	29	10	7	19	22	na	na	na	na	na	na	na	na	na	na	na	na	na	na	na	na	na	na	na
G15T	284	101	28	21	38	55	na	8	na	9	280	130	72	14	14	39	4	2	2	na	298	43	44	16	13	6	9	9	na	3	na	na	na	na	na	na	na	na	na	na	na	na	na	na	na	na	na	na	na
G15V	187	33	15	4	9	na	na	na	na	3	195	3	5	70	26	8	3	4	na	14	1	1	8	5	na	7	11	2	na	na	na	na	na	na	na	na	na	na	na	na	na	na	na	na	na	na	na	na	na
G15W	238	45	22	2	24	na	1	3	na	6	151	55	24	28	12	16	4	na	2	na	281	43	23	15	2	10	2	3	6	3	na	na	na	na	na	na	na	na	na	na	na	na	na	na	na	na	na	na	na
G15Y	113	22	4	na	2	na	3	na	4	8	102	15	5	na	9	na	na	na	na	11	88	9	5	3	na	na	3	na	na	na	na	na	na	na	na	na	na	na	na	na	na	na	na	na	na	na	na	na	na
G43*	110	13	10	10	na	4	3	na	na	4	186	31	9	15	20	na	na	na	4	na	na	na	na	na	na	na	na	na	na	na	116	59	14	10	9	4	7	8	6	na	na	na	na	na	na	na	na	na	na
G43A	426	241	131	60	10	30	15	na	11	5	551	209	118	37	30	95	475	17	18	12	na	na	na	na	na	na	na	na	na	na	586	322	49	58	16	12	22	35	9	14	na	na	na	na	na	na	na	na	na
G43C	2	na	na	na	na	na	4	na	na	na	43	2	na	1	1	na	na	na	na	na	na	na	na	na	na	na	na	na	na	na	na	2	na	na	na	1	na	na	na	na	na	na	na	na	na	na	na	na	na
G43D	na	na	na	na	na	2	na	na	na	na	2	1	na	1	3	2	na	na	na	na	na	na	na	na	na	na	na	na	na	na	na	na	3	na	5	na	na	na	na	na	na	na	na	na	na	na	na	na	na
G43E	289	34	18	10	2	6	1	5	na	na	249	36	75	10	12	2	6	4	9	6	na	na	na	na	na	na	na	na	na	na	178	77	12	9	4	5	11	7	8	3	na	na	na	na	na	na	na	na	na
G43F	111	8	5	3	na	9	na	na	na	19	77	13	15	1	5	na	3	4	3	na	na	na	na	na	na	na	na	na	na	na	79	21	3	5	2	2	2	na	na	na	na	na	na	na	na	na	na	na	na
G43H	64	na	na	na	2	16	na	na	na	2	108	3	na	7	na	na	na	na	6	11	na	na	na	na	na	na	na	na	na	na	29	12	2	na	1	2	na	na	2	na	na	na	na	na	na	na	na	na	na
G43I	56	12	3	na	na	14	5	na	na	3	199	7	6	3	3	na	na	na	2	na	na	na	na	na	na	na	na	na	na	na	56	11	8	3	3	3	na	na	na	na	na	na	na	na	na	na	na	na	na
G43K	234	20	10	10	na	na	9	na	na	na	353	43	15	15	49	51	6	4	10	na	na	na	na	na	na	na	na	na	na	na	282	95	45	13	21	3	5	4	5	na	na	na	na	na	na	na	na	na	na
G43L	577	56	31	6	13	9	2	30	3	3	1	81	19	27	12	na	8	22	14	5	na	na	na	na	na	na	na	na	na	na	440	112	20	35	18	10	13	6	15	10	na	na	na	na	na	na	na	na	na
G43M	145	24	6	10	na	na	2	na	na	na	271	26	12	9	7	na	7	2	5	na	na	na	na	na	na	na	na	na	na	na	122	39	8	6	5	4	9	3	4	3	na	na	na	na	na	na	na	na	na
G43N	164	5	8	na	4	na	na	na	na	na	161	13	14	7	15	32	na	6	4	na	na	na	na	na	na	na	na	na	na	na	122	27	3	5	1	1	na	na	na	na	na	na	na	na	na	na	na	na	na
G43P	70	9	5	na	na	na	1	na	na	na	184	8	10	2	15	8	na	7	2	na	na	na	na	na	na	na	na	na	na	na	90	18	1	11	1	4	na	9	na	2	na	na	na	na	na	na	na	na	na
G43Q	79	22	6	4	na	na	2	na	2	na	191	24	4	5	40	15	4	11	na	15	na	na	na	na	na	na	na	na	na	na	95	24	6	4	2	1	2	3	4	2	na	na	na	na	na	na	na	na	na
G43R	393	41	13	8	19	na	1	na	2	3	1	59	27	14	6	46	9	6	11	12	na	na	na	na	na	na	na	na	na	na	348	101	15	17	14	15	12	16	9	13	na	na	na	na	na	na	na	na	na
G43S	343	2	27	22	14	5	12	na	na	14	3	99	87	26	26	36	5	10	5	107	na	na	na	na	na	na	na	na	na	na	319	101	26	18	20	12	9	10	na	3	na	na	na	na	na	na	na	na	na
G43T	118	27	6	na	14	na	na	na	na	na	204	20	5	2	3	3	na	na	8	na	na	na	na	na	na	na	na	na	na	na	164	37	9	9	2	5	2	6	2	na	na	na	na	na	na	na	na	na	na
G43V	287	23	29	9	2	na	7	na	10	64	560	35	20	10	34	86	10	5	8	10	na	na	na	na	na	na	na	na	na	na	363	91	25	21	14	15	8	10	14	6	na	na	na	na	na	na	na	na	na
G43W	253	41	15	9	6	3	6	5	7	na	358	48	34	13	19	4	25	8	10	34	na	na	na	na	na	na	na	na	na	na	414	87	14	20	10	12	12	2	10	4	na	na	na	na	na	na	na	na	na
G43Y	73	9	na	2	na	na	na	na	na	na	121	14	15	na	4	na	6	na	5	na	na	na	na	na	na	na	na	na	na	na	68	17	3	2	3	na	3	3	na	na	na	na	na	na	na	na	na	na	na
G51*	69	7	4	2	na	na	2	45	na	na	259	6	na	5	7	na	na	2	3	na	na	na	na	na	na	na	na	na	na	na	71	25	1	2	1	1	4	na	na	10	na	na	na	na	na	na	na	na	na
G51A	434	672	261	228	222	234	203	243	174	330	3	324	216	153	205	559	220	157	293	287	na	na	na	na	na	na	na	na	na	na	430	580	100	151	110	95	164	162	174	162	na	na	na	na	na	na	na	na	na
G51C	333	511	207	154	213	158	109	281	143	169	1	179	111	68	140	487	193	129	157	196	na	na	na	na	na	na	na	na	na	na	315	380	82	116	89	64	90	109	105	76	na	na	na	na	na	na	na	na	na
G51D	811	1001	456	427	488	454	434	822	386	580	1	633	231	290	411	590	313	432	544	494	na	na	na	na	na	na	na	na	na	na	647	827	173	254	202	213	275	299	335	315	na	na	na	na	na	na	na	na	na
G51E	295	411	319	222	268	153	191	562	138	404	314	256	160	104	216	163	190	231	316	426	na	na	na	na	na	na	na	na	na	na	367	524	91	132	120	123	186	187	213	261	na	na	na	na	na	na	na	na	na
G51F	609	791	348	264	310	253	211	521	199	401	507	327	126	151	167	513	280	212	296	382	na	na	na	na	na	na	na	na	na	na	551	708	146	194	178	149	228	303	224	224	na	na	na	na	na	na	na	na	na
G51H	463	694	331	227	224	248	210	408	252	513	322	352	111	159	201	265	226	196	335	496	na	na	na	na	na	na	na	na	na	na	426	545	122	133	124	103	169	173	193	208	na	na	na	na	na	na	na	na	na
G51I	458	764	500	247	260	203	284	548	290	477	460	381	138	191	201	1128	261	625	395	619	na	na	na	na	na	na	na	na	na	na	564	668	141	149	148	130	199	247	249	347	na	na	na	na	na	na	na	na	na
G51K	692	829	332	263	410	469	248	573	200	441	349	398	178	230	271	368	266	220	342	610	na	na	na	na	na	na	na	na	na	na	639	799	150	186	217	154	222	321	279	254	na	na	na	na	na	na	na	na	na
G51L	990	1166	468	375	509	413	437	481	343	527	755	665	388	236	438	542	358	464	450	423	na	na	na	na	na	na	na	na	na	na	944	1095	311	294	261	198	279	291	294	238	na	na	na	na	na	na	na	na	na
G51M	250	456	126	126	242	134	123	315	104	141	194	161	108	87	84	152	115	284	112	62	na	na	na	na	na	na	na	na	na	na	259	313	51	92	75	51	104	108	111	80	na	na	na	na	na	na	na	na	na
G51N	1239	1756	793	495	652	672	484	1119	496	897	1279	819	349	525	393	1612	513	476	671	941	na	na	na	na	na	na	na	na	na	na	1184	1551	399	363	323	253	424	440	452	455	na	na	na	na	na	na	na	na	na
G51P	280	2	262	161	99	186	110	223	132	236	193	186	63	106	117	136	163	134	199	149	na	na	na	na	na	na	na	na	na	na	258	261	65	71	68	49	84	134	120	124	na	na	na	na	na	na	na	na	na
G51Q	257	215	124	92	251	91	111	349	151	146	77	176	59	30	84	629	262	56	118	146	na	na	na	na	na	na	na	na	na	na	197	264	53	69	52	49	100	82	90	77	na	na	na	na	na	na	na	na	na
G51R	992	1469	627	427	572	519	449	886	421	708	665	807	537	427	341	1525	511	458	563	553	na	na	na	na	na	na	na	na	na	na	1043	1240	269	309	289	255	374	385	363	363	na	na	na	na	na	na	na	na	na
G51S	1040	2	826	478	438	684	390	718	417	730	2	692	324	517	369	5913	450	428	612	683	na	na	na	na	na	na	na	na	na	na	929	1451	433	313	271	184	315	322	380	394	na	na	na	na	na	na	na	na	na
G51T	4	580	265	227	184	250	260	452	217	454	2	275	104	111	165	344	209	245	357	411	na	na	na	na	na	na	na	na	na	na	416	484	87	117	106	106	170	206	228	211	na	na	na	na	na	na	na	na	na
G51V	941	1422	580	327	560	511	379	866	463	967	3	683	474	503	335	1215	521	449	648	1355	na	na	na	na	na	na	na	na	na	na	933	1208	252	308	263	239	364	386	411	476	na	na	na	na	na	na	na	na	na
G51W	688	937	403	265	284	309	320	860	232	505	396	422	182	164	199	229	318	301	363	1381	na	na	na	na	na	na	na	na	na	na	680	752	158	218	192	159	167	214	272	230	na	na	na	na	na	na	na	na	na
G51Y	633	2	360	266	433	268	222	571	230	413	297	407	184	258	167	328	271	174	317	491	na	na	na	na	na	na	na	na	na	na	496	676	135	194	151	123	183	195	228	183	na	na	na	na	na	na	na	na	na
G56*	51	5	2	2	3	na	1	na	na	5	1	5	2	7	2	2	4	2	4	na	na	na	na	na	na	na	na	na	na	na	48	5	7	3	4	6	na	na	na	na	na	na	na	na	na	na	na	na	na
G56A	231	333	366	59	147	65	71	184	87	100	263	169	116	99	104	97	170	66	109	114	na	na	na	na	na	na	na	na	na	na	209	275	69	62	42	49	51	64	71	76	na	na	na	na	na	na	na	na	na
G56C	129	137	91	37	89	21	57	70	61	54	137	76	56	30	55	38	27	129	68	82	na	na	na	na	na	na	na	na	na	na	77	137	26	32	27	34	21	22	34	26	na	na	na	na	na	na	na	na	na
G56D	281	327	175	117	115	116	133	314	120	161	284	231	74	80	104	400	108	81	141	145	na	na	na	na	na	na	na	na	na	na	184	272	49	71	62	49	72	76	69	70	na	na	na	na	na	na	na	na	na
G56E	756	786	374	288	272	301	205	368	245	291	2	435	197	184	220	916	195	214	267	294	na	na	na	na	na	na	na	na	na	na	576	742	169	163	159	127	222	211	217	228	na	na	na	na	na	na	na	na	na
G56F	123	234	92	45	81	79	60	39	33	83	218	108	58	50	32	68	126	59	75	53	na	na	na	na	na	na	na	na	na	na	117	173	33	29	33	25	27	91	38	39	na	na	na	na	na	na	na	na	na
G56H	238	354	146	106	136	171	158	218	97	142	138	152	55	76	60	155	110	67	123	129	na	na	na	na	na	na	na	na	na	na	187	223	43	58	54	46	57	85	62	44	na	na	na	na	na	na	na	na	na
G56I	228	358	123	81	80	77	40	119	33	84	210	135	76	164	68	92	60	60	89	71	na	na	na	na	na	na	na	na	na	na	165	216	53	70	42	34	51	47	46	38	na	na	na	na	na	na	na	na	na
G56K	573	827	296	316	340	192	257	631	231	347	563	408	221	197	247	1205	247	217	334	347	na	na	na	na	na	na	na	na	na	na	440	628	109	142	113	76	177	109	166	139	na	na	na	na	na	na	na	na	na
G56L	623	736	357	641	534	213	183	413	150	226	364	408	178	407	193	243	185	141	223	220	na	na	na	na	na	na	na	na	na	na	468	618	100	142	109	125	206	160	136	151	na	na	na	na	na	na	na	na	na
G56M	475	522	219	204	143	171	117	257	82	223	237	263	157	95	123	204	147	198	188	246	na	na	na	na	na	na	na	na	na	na	353	578	111	101	88	79	120	160	108	103	na	na	na	na	na	na	na	na	na
G56N	221	270	114	87	115	81	69	180	65	149	138	135	43	75	95	490	95	70	70	91	na	na	na	na	na	na	na	na	na	na	141	190	65	56	57	43	56	64	42	52	na	na	na	na	na	na	na	na	na
G56P	70	60	33	na	7	na	5	8	na	8	29	51	8	9	31	27	3	5	7	3	na	na	na	na	na	na	na	na	na	na	74	47	3	6	7	6	2	2	6	na	na	na	na	na	na	na	na	na	na
G56Q	206	388	183	101	105	114	123	104	78	125	166	204	63	91	111	202	179	176	135	110	na	na	na	na	na	na	na	na	na	na	216	330	69	94	71	53	67	74	111	82	na	na	na	na	na	na	na	na	na
G56R	638	814	364	254	352	239	232	335	262	229	4	402	172	155	238	445	247	179	253	370	na	na	na	na	na	na	na	na	na	na	547	737	111	160	159	151	173	156	160	172	na	na	na	na	na	na	na	na	na
G56S	230	489	162	123	87	91	123	127	99	159	138	222	126	52	310	113	104	91	94	96	na	na	na	na	na	na	na	na	na	na	209	323	58	62	49	49	73	76	85	72	na	na	na	na	na	na	na	na	na
G56T	313	362	176	103	188	132	118	156	99	133	1	181	60	121	130	91	89	101	139	122	na	na	na	na	na	na	na	na	na	na	186	233	59	67	52	48	68	116	84	76	na	na	na	na	na	na	na	na	na
G56V	890	1134	477	399	464	351	280	513	307	266	3	587	231	327	495	673	284	267	316	469	na	na	na	na	na	na	na	na	na	na	847	1023	164	215	158	143	176	229	242	227	na	na	na	na	na	na	na	na	na
G56W	156	197	100	39	59	30	53	70	71	105	37	114	26	29	61	89	42	64	78	43	na	na	na	na	na	na	na	na	na	na	138	178	70	58	32	22	44	28	44	36	na	na	na	na	na	na	na	na	na
G56Y	168	238	159	58	80	101	54	208	81	146	168	138	161	67	80	44	79	51	108	76	na	na	na	na	na	na	na	na	na	na	161	293	35	59	47	37	63	64	67	73	na	na	na	na	na	na	na	na	na
G67*	170	23	6	3	2	na	5	na	na	na	377	15	33	3	10	na	2	78	2	15	na	na	na	na	na	na	na	na	na	na	101	55	3	4	9	1	2	5	na	4	na	na	na	na	na	na	na	na	na
G67A	3	456	202	158	156	191	194	212	190	310	212	215	96	85	122	295	134	563	204	243	na	na	na	na	na	na	na	na	na	na	310	490	337	120	86	100	132	162	179	186	na	na	na	na	na	na	na	na	na
G67C	65	69	54	41	13	41	42	27	35	58	2	55	37	22	22	68	38	34	48	71	na	na	na	na	na	na	na	na	na	na	78	3	23	28	24	14	33	46	36	52	na	na	na	na	na	na	na	na	na
G67D	3	494	165	166	159	267	150	297	210	253	172	197	114	98	190	194	155	187	222	282	na	na	na	na	na	na	na	na	na	na	228	2	70	117	119	83	140	140	153	207	na	na	na	na	na	na	na	na	na
G67E	944	1205	508	436	465	762	553	1407	501	926	503	570	256	255	315	603	449	495	734	739	na	na	na	na	na	na	na	na	na	na	677	958	180	251	234	219	319	460	465	457	na	na	na	na	na	na	na	na	na
G67F	77	87	40	38	56	29	26	72	22	57	3	43	33	9	36	30	39	28	28	30	na	na	na	na	na	na	na	na	na	na	93	86	23	30	20	19	18	40	24	11	na	na	na	na	na	na	na	na	na
G67H	128	191	61	18	39	18	51	59	48	25	79	107	53	29	51	39	31	28	53	39	na	na	na	na	na	na	na	na	na	na	145	170	45	31	32	35	44	19	28	44	na	na	na	na	na	na	na	na	na
G67I	268	341	118	75	170	73	92	253	97	169	102	138	102	84	91	53	216	81	136	102	na	na	na	na	na	na	na	na	na	na	173	285	88	82	77	58	129	70	102	74	na	na	na	na	na	na	na	na	na
G67K	3	3117	1501	929	1034	1104	956	1865	837	1293	1729	1590	634	774	816	1693	1073	819	1118	1049	na	na	na	na	na	na	na	na	na	na	2230	2613	639	668	574	530	721	806	798	750	na	na	na	na	na	na	na	na	na
G67L	415	763	246	118	264	166	175	490	229	529	171	359	130	1258	168	272	215	206	227	355	na	na	na	na	na	na	na	na	na	na	359	564	115	123	130	121	183	185	201	214	na	na	na	na	na	na	na	na	na
G67M	299	3	212	132	156	303	220	244	190	397	147	314	82	257	153	588	174	166	268	314	na	na	na	na	na	na	na	na	na	na	316	340	70	129	105	92	141	151	189	198	na	na	na	na	na	na	na	na	na
G67N	1150	1712	580	502	445	522	422	843	330	856	674	775	307	394	387	561	453	483	596	686	na	na	na	na	na	na	na	na	na	na	825	1149	272	341	240	235	322	361	378	379	na	na	na	na	na	na	na	na	na
G67P	164	229	119	77	45	38	50	175	93	112	160	131	46	33	89	97	63	94	118	156	na	na	na	na	na	na	na	na	na	na	107	173	45	52	54	33	70	113	82	105	na	na	na	na	na	na	na	na	na
G67Q	132	253	69	58	74	47	39	34	54	69	166	148	495	435	69	93	43	51	57	83	na	na	na	na	na	na	na	na	na	na	157	167	46	47	40	18	45	72	63	45	na	na	na	na	na	na	na	na	na
G67R	1190	1230	536	291	322	426	294	495	146	311	590	792	342	306	272	563	334	215	289	268	na	na	na	na	na	na	na	na	na	na	1053	964	219	309	248	214	244	256	252	173	na	na	na	na	na	na	na	na	na
G67S	388	2	184	158	97	259	201	320	237	395	240	274	140	63	144	198	279	335	257	289	na	na	na	na	na	na	na	na	na	na	348	430	92	104	98	84	137	156	174	148	na	na	na	na	na	na	na	na	na
G67T	2	651	314	193	229	155	300	587	441	592	267	389	90	121	117	176	250	263	293	387	na	na	na	na	na	na	na	na	na	na	388	532	119	129	103	106	188	205	217	231	na	na	na	na	na	na	na	na	na
G67V	926	1486	589	417	657	576	445	701	585	826	1	636	232	197	414	508	417	415	584	726	na	na	na	na	na	na	na	na	na	na	664	1077	214	306	245	222	409	446	464	446	na	na	na	na	na	na	na	na	na
G67W	657	799	330	174	290	55	111	289	105	175	461	394	485	139	267	262	210	134	174	335	na	na	na	na	na	na	na	na	na	na	460	689	113	138	125	97	131	90	157	82	na	na	na	na	na	na	na	na	na
G67Y	2	165	101	49	66	30	54	68	63	78	78	163	27	39	66	551	59	57	64	88	na	na	na	na	na	na	na	na	na	na	147	196	35	61	38	38	46	29	64	50	na	na	na	na	na	na	na	na	na
G86*	na	na	na	na	na	na	na	na	na	na	na	na	na	na	na	na	na	na	na	na	113	10	4	3	3	7	na	4	na	na	na	na	na	na	na	na	na	na	na	na	133	7	16	12	5	8	7	na	6
G86A	na	na	na	na	na	na	na	na	na	na	na	na	na	na	na	na	na	na	na	na	359	460	481	255	353	342	328	277	875	501	na	na	na	na	na	na	na	na	na	na	1007	1174	445	401	489	515	540	764	622
G86C	na	na	na	na	na	na	na	na	na	na	na	na	na	na	na	na	na	na	na	na	256	292	198	117	130	193	172	246	344	288	na	na	na	na	na	na	na	na	na	na	551	572	213	211	272	267	228	306	233
G86D	na	na	na	na	na	na	na	na	na	na	na	na	na	na	na	na	na	na	na	na	155	268	134	98	78	132	167	158	290	173	na	na	na	na	na	na	na	na	na	na	373	438	162	181	218	248	193	305	203
G86E	na	na	na	na	na	na	na	na	na	na	na	na	na	na	na	na	na	na	na	na	412	641	420	293	249	300	334	249	785	476	na	na	na	na	na	na	na	na	na	na	861	1110	351	434	489	553	468	607	624
G86F	na	na	na	na	na	na	na	na	na	na	na	na	na	na	na	na	na	na	na	na	536	755	640	403	494	461	521	497	1098	807	na	na	na	na	na	na	na	na	na	na	1502	1869	618	696	916	1001	835	1227	1054
G86H	na	na	na	na	na	na	na	na	na	na	na	na	na	na	na	na	na	na	na	na	341	440	334	218	224	340	393	350	828	433	na	na	na	na	na	na	na	na	na	na	827	1958	470	463	600	569	567	744	693
G86I	na	na	na	na	na	na	na	na	na	na	na	na	na	na	na	na	na	na	na	na	295	411	397	227	283	372	388	341	970	693	na	na	na	na	na	na	na	na	na	na	862	985	405	467	600	579	643	956	818
G86K	na	na	na	na	na	na	na	na	na	na	na	na	na	na	na	na	na	na	na	na	970	886	1125	475	489	646	657	585	1703	1000	na	na	na	na	na	na	na	na	na	na	1829	2084	699	923	1146	1102	993	1403	1143
G86L	na	na	na	na	na	na	na	na	na	na	na	na	na	na	na	na	na	na	na	na	1870	2376	2043	1171	1234	1523	1608	1522	3745	2377	na	na	na	na	na	na	na	na	na	na	4713	6008	2011	2379	2719	2963	2591	3851	2783
G86M	na	na	na	na	na	na	na	na	na	na	na	na	na	na	na	na	na	na	na	na	464	823	591	346	420	424	402	470	1034	631	na	na	na	na	na	na	na	na	na	na	1166	1494	520	589	687	788	678	991	791
G86N	na	na	na	na	na	na	na	na	na	na	na	na	na	na	na	na	na	na	na	na	434	630	457	271	287	309	345	288	689	486	na	na	na	na	na	na	na	na	na	na	1009	1242	378	488	582	607	536	725	607
G86P	na	na	na	na	na	na	na	na	na	na	na	na	na	na	na	na	na	na	na	na	1444	1766	1501	870	1171	1396	1493	1716	4719	3034	na	na	na	na	na	na	na	na	na	na	3319	3810	1454	1779	2385	2401	2699	4407	3932
G86Q	na	na	na	na	na	na	na	na	na	na	na	na	na	na	na	na	na	na	na	na	332	354	479	198	594	252	320	309	714	536	na	na	na	na	na	na	na	na	na	na	913	934	391	413	577	581	523	732	682
G86R	na	na	na	na	na	na	na	na	na	na	na	na	na	na	na	na	na	na	na	na	1371	1900	1638	986	1129	1327	1344	1416	3534	2448	na	na	na	na	na	na	na	na	na	na	2648	3246	1435	1686	2049	2184	2089	2914	2430
G86S	na	na	na	na	na	na	na	na	na	na	na	na	na	na	na	na	na	na	na	na	848	882	958	525	541	695	708	840	1668	1180	na	na	na	na	na	na	na	na	na	na	1914	1722	753	946	1046	1094	971	1475	1295
G86T	na	na	na	na	na	na	na	na	na	na	na	na	na	na	na	na	na	na	na	na	699	999	940	488	580	691	809	878	2153	1206	na	na	na	na	na	na	na	na	na	na	1599	1864	695	907	1139	1083	1145	1706	1443
G86V	na	na	na	na	na	na	na	na	na	na	na	na	na	na	na	na	na	na	na	na	627	1043	930	568	592	703	802	841	1972	1140	na	na	na	na	na	na	na	na	na	na	2080	2732	896	1062	1251	1409	1271	2064	1716
G86W	na	na	na	na	na	na	na	na	na	na	na	na	na	na	na	na	na	na	na	na	397	596	626	327	678	380	421	399	910	660	na	na	na	na	na	na	na	na	na	na	1026	1807	471	536	668	1640	604	842	720
G86Y	na	na	na	na	na	na	na	na	na	na	na	na	na	na	na	na	na	na	na	na	182	184	295	172	159	189	144	162	334	204	na	na	na	na	na	na	na	na	na	na	487	500	178	240	274	225	227	369	269
G95*	na	na	na	na	na	na	na	na	na	na	na	na	na	na	na	na	na	na	na	na	131	8	10	3	na	4	na	na	21	na	na	na	na	na	na	na	na	na	na	na	172	36	13	15	7	18	8	na	4
G95A	na	na	na	na	na	na	na	na	na	na	na	na	na	na	na	na	na	na	na	na	132	7	3	na	na	2	na	na	na	na	na	na	na	na	na	na	na	na	na	na	119	20	na	4	na	7	na	na	4
G95C	na	na	na	na	na	na	na	na	na	na	na	na	na	na	na	na	na	na	na	na	19	1	na	na	na	na	na	na	na	na	na	na	na	na	na	na	na	na	na	na	na	na	na	na	na	na	na	na	na
G95D	na	na	na	na	na	na	na	na	na	na	na	na	na	na	na	na	na	na	na	na	36	1	na	na	na	2	na	na	na	na	na	na	na	na	na	na	na	na	na	na	na	na	na	na	na	na	na	na	na
G95E	na	na	na	na	na	na	na	na	na	na	na	na	na	na	na	na	na	na	na	na	196	14	7	8	2	3	4	2	na	na	na	na	na	na	na	na	na	na	na	na	227	30	18	8	8	12	7	17	4
G95F	na	na	na	na	na	na	na	na	na	na	na	na	na	na	na	na	na	na	na	na	255	11	14	7	3	9	5	na	7	8	na	na	na	na	na	na	na	na	na	na	377	106	31	26	11	17	16	17	na
G95H	na	na	na	na	na	na	na	na	na	na	na	na	na	na	na	na	na	na	na	na	156	4	6	5	3	4	4	na	na	3	na	na	na	na	na	na	na	na	na	na	156	16	23	4	na	7	8	na	na
G95I	na	na	na	na	na	na	na	na	na	na	na	na	na	na	na	na	na	na	na	na	139	12	na	4	3	na	4	na	na	na	na	na	na	na	na	na	na	na	na	na	245	4	4	na	4	na	na	6	4
G95K	na	na	na	na	na	na	na	na	na	na	na	na	na	na	na	na	na	na	na	na	324	14	8	4	6	5	2	2	na	3	na	na	na	na	na	na	na	na	na	na	332	53	36	26	10	16	6	10	8
G95L	na	na	na	na	na	na	na	na	na	na	na	na	na	na	na	na	na	na	na	na	962	44	30	19	10	9	3	8	20	8	na	na	na	na	na	na	na	na	na	na	1124	214	67	60	42	45	24	30	24
G95M	na	na	na	na	na	na	na	na	na	na	na	na	na	na	na	na	na	na	na	na	119	7	3	3	3	5	na	na	na	3	na	na	na	na	na	na	na	na	na	na	253	14	17	10	18	6	4	na	6
G95N	na	na	na	na	na	na	na	na	na	na	na	na	na	na	na	na	na	na	na	na	91	8	10	2	3	4	2	5	na	na	na	na	na	na	na	na	na	na	na	na	130	62	19	9	9	na	4	8	na
G95P	na	na	na	na	na	na	na	na	na	na	na	na	na	na	na	na	na	na	na	na	576	28	16	9	20	22	7	4	17	4	na	na	na	na	na	na	na	na	na	na	829	249	70	53	40	114	18	26	9
G95Q	na	na	na	na	na	na	na	na	na	na	na	na	na	na	na	na	na	na	na	na	119	8	14	2	na	4	2	na	na	na	na	na	na	na	na	na	na	na	na	na	166	56	14	13	5	9	6	5	na
G95R	na	na	na	na	na	na	na	na	na	na	na	na	na	na	na	na	na	na	na	na	397	22	15	9	6	7	10	4	4	na	na	na	na	na	na	na	na	na	na	na	515	72	49	24	19	na	18	20	na
G95S	na	na	na	na	na	na	na	na	na	na	na	na	na	na	na	na	na	na	na	na	281	21	14	na	na	8	6	5	na	4	na	na	na	na	na	na	na	na	na	na	347	118	20	20	17	8	4	na	4
G95T	na	na	na	na	na	na	na	na	na	na	na	na	na	na	na	na	na	na	na	na	299	19	5	3	na	3	na	na	12	6	na	na	na	na	na	na	na	na	na	na	286	89	38	14	7	17	na	na	17
G95V	na	na	na	na	na	na	na	na	na	na	na	na	na	na	na	na	na	na	na	na	298	15	6	5	4	2	na	na	4	16	na	na	na	na	na	na	na	na	na	na	313	54	13	18	13	4	4	19	7
G95W	na	na	na	na	na	na	na	na	na	na	na	na	na	na	na	na	na	na	na	na	194	19	14	3	2	3	na	3	na	na	na	na	na	na	na	na	na	na	na	na	353	43	37	25	23	4	9	7	11
G95Y	na	na	na	na	na	na	na	na	na	na	na	na	na	na	na	na	na	na	na	na	149	9	6	3	3	na	na	na	na	na	na	na	na	na	na	na	na	na	na	na	137	59	10	4	na	5	na	18	13
G96*	na	na	na	na	na	na	na	na	na	na	na	na	na	na	na	na	na	na	na	na	225	15	12	10	6	4	4	na	6	na	na	na	na	na	na	na	na	na	na	na	322	34	37	20	33	24	22	7	13
G96A	na	na	na	na	na	na	na	na	na	na	na	na	na	na	na	na	na	na	na	na	152	27	14	5	2	5	na	na	na	na	na	na	na	na	na	na	na	na	na	na	263	82	21	12	14	5	4	na	na
G96C	na	na	na	na	na	na	na	na	na	na	na	na	na	na	na	na	na	na	na	na	3	1	na	na	na	na	na	na	na	na	na	na	na	na	na	na	na	na	na	na	na	na	na	na	na	na	6	na	na
G96D	na	na	na	na	na	na	na	na	na	na	na	na	na	na	na	na	na	na	na	na	28	na	na	na	na	na	na	na	na	na	na	na	na	na	na	na	na	na	na	na	na	na	na	na	na	na	na	na	na
G96E	na	na	na	na	na	na	na	na	na	na	na	na	na	na	na	na	na	na	na	na	371	20	9	5	5	2	na	3	na	4	na	na	na	na	na	na	na	na	na	na	427	79	53	22	24	15	13	8	11
G96F	na	na	na	na	na	na	na	na	na	na	na	na	na	na	na	na	na	na	na	na	118	11	3	3	na	3	na	na	5	na	na	na	na	na	na	na	na	na	na	na	165	na	14	13	11	7	6	7	10
G96H	na	na	na	na	na	na	na	na	na	na	na	na	na	na	na	na	na	na	na	na	40	1	na	2	na	na	na	na	na	na	na	na	na	na	na	na	na	na	na	na	66	65	5	na	na	na	na	na	na
G96I	na	na	na	na	na	na	na	na	na	na	na	na	na	na	na	na	na	na	na	na	110	6	3	na	na	3	na	na	na	na	na	na	na	na	na	na	na	na	na	na	135	na	20	4	10	na	na	na	5
G96K	na	na	na	na	na	na	na	na	na	na	na	na	na	na	na	na	na	na	na	na	466	23	33	10	3	11	19	8	37	17	na	na	na	na	na	na	na	na	na	na	675	285	59	34	30	15	30	46	47
G96L	na	na	na	na	na	na	na	na	na	na	na	na	na	na	na	na	na	na	na	na	396	32	23	7	6	6	6	18	26	13	na	na	na	na	na	na	na	na	na	na	677	135	66	40	32	34	32	43	49
G96M	na	na	na	na	na	na	na	na	na	na	na	na	na	na	na	na	na	na	na	na	272	20	3	9	2	na	3	na	4	5	na	na	na	na	na	na	na	na	na	na	374	117	35	29	9	42	13	11	8
G96N	na	na	na	na	na	na	na	na	na	na	na	na	na	na	na	na	na	na	na	na	139	4	4	na	3	na	na	na	na	na	na	na	na	na	na	na	na	na	na	na	113	na	15	14	na	7	7	11	na
G96P	na	na	na	na	na	na	na	na	na	na	na	na	na	na	na	na	na	na	na	na	90	7	na	3	2	na	na	na	5	na	na	na	na	na	na	na	na	na	na	na	158	26	16	na	na	13	13	na	na
G96Q	na	na	na	na	na	na	na	na	na	na	na	na	na	na	na	na	na	na	na	na	179	9	10	2	4	5	na	3	na	4	na	na	na	na	na	na	na	na	na	na	269	66	19	14	8	7	14	na	6
G96R	na	na	na	na	na	na	na	na	na	na	na	na	na	na	na	na	na	na	na	na	487	33	31	6	7	19	7	3	26	5	na	na	na	na	na	na	na	na	na	na	790	175	63	50	29	34	39	39	13
G96S	na	na	na	na	na	na	na	na	na	na	na	na	na	na	na	na	na	na	na	na	120	15	3	na	2	2	na	2	na	na	na	na	na	na	na	na	na	na	na	na	234	42	13	3	7	7	11	na	5
G96T	na	na	na	na	na	na	na	na	na	na	na	na	na	na	na	na	na	na	na	na	177	9	8	7	4	3	na	3	na	na	na	na	na	na	na	na	na	na	na	na	210	88	38	5	9	8	na	6	na
G96V	na	na	na	na	na	na	na	na	na	na	na	na	na	na	na	na	na	na	na	na	210	8	26	11	20	3	6	na	na	na	na	na	na	na	na	na	na	na	na	na	394	132	24	22	10	10	4	9	na
G96W	na	na	na	na	na	na	na	na	na	na	na	na	na	na	na	na	na	na	na	na	192	13	7	6	5	41	na	na	na	na	na	na	na	na	na	na	na	na	na	na	347	117	38	41	17	24	8	11	5
G96Y	na	na	na	na	na	na	na	na	na	na	na	na	na	na	na	na	na	na	na	na	96	12	6	na	na	na	na	5	na	na	na	na	na	na	na	na	na	na	na	na	130	53	8	16	na	4	na	na	na
G97*	na	na	na	na	na	na	na	na	na	na	na	na	na	na	na	na	na	na	na	na	198	13	8	2	4	4	na	na	4	na	na	na	na	na	na	na	na	na	na	na	205	9	20	19	14	12	na	na	5
G97A	na	na	na	na	na	na	na	na	na	na	na	na	na	na	na	na	na	na	na	na	192	345	258	146	251	204	206	154	503	301	na	na	na	na	na	na	na	na	na	na	629	429	314	385	423	423	364	640	381
G97C	na	na	na	na	na	na	na	na	na	na	na	na	na	na	na	na	na	na	na	na	259	336	333	118	83	120	82	122	116	113	na	na	na	na	na	na	na	na	na	na	646	738	361	214	259	470	152	194	138
G97D	na	na	na	na	na	na	na	na	na	na	na	na	na	na	na	na	na	na	na	na	302	286	274	193	172	199	214	98	175	160	na	na	na	na	na	na	na	na	na	na	691	836	313	230	308	260	232	268	185
G97E	na	na	na	na	na	na	na	na	na	na	na	na	na	na	na	na	na	na	na	na	487	600	696	391	348	409	304	327	685	471	na	na	na	na	na	na	na	na	na	na	1456	2377	657	822	834	797	647	922	721
G97F	na	na	na	na	na	na	na	na	na	na	na	na	na	na	na	na	na	na	na	na	530	742	627	324	278	331	180	245	278	268	na	na	na	na	na	na	na	na	na	na	1811	2814	695	533	626	490	356	381	258
G97H	na	na	na	na	na	na	na	na	na	na	na	na	na	na	na	na	na	na	na	na	594	896	603	339	331	441	227	214	318	266	na	na	na	na	na	na	na	na	na	na	1577	1832	764	718	722	606	437	451	194
G97I	na	na	na	na	na	na	na	na	na	na	na	na	na	na	na	na	na	na	na	na	213	34	38	9	16	4	na	4	19	na	na	na	na	na	na	na	na	na	na	na	285	201	37	20	14	15	na	12	na
G97K	na	na	na	na	na	na	na	na	na	na	na	na	na	na	na	na	na	na	na	na	1264	1827	1301	815	713	957	583	453	1359	876	na	na	na	na	na	na	na	na	na	na	3636	3696	1682	1531	1842	1566	1261	1352	955
G97L	na	na	na	na	na	na	na	na	na	na	na	na	na	na	na	na	na	na	na	na	1319	1438	1143	585	504	588	313	173	422	458	na	na	na	na	na	na	na	na	na	na	4251	3697	1453	924	957	914	612	727	374
G97M	na	na	na	na	na	na	na	na	na	na	na	na	na	na	na	na	na	na	na	na	654	828	630	362	345	462	288	350	574	465	na	na	na	na	na	na	na	na	na	na	1568	1509	719	683	859	1004	590	848	518
G97N	na	na	na	na	na	na	na	na	na	na	na	na	na	na	na	na	na	na	na	na	811	1066	1020	537	581	667	512	533	1036	930	na	na	na	na	na	na	na	na	na	na	1968	3383	1042	1231	1402	1350	1065	1315	811
G97P	na	na	na	na	na	na	na	na	na	na	na	na	na	na	na	na	na	na	na	na	2231	1187	757	302	169	157	71	60	55	85	na	na	na	na	na	na	na	na	na	na	4667	2868	911	340	346	432	135	131	102
G97Q	na	na	na	na	na	na	na	na	na	na	na	na	na	na	na	na	na	na	na	na	497	692	610	384	424	539	538	421	1372	719	na	na	na	na	na	na	na	na	na	na	1519	1830	764	804	1080	1043	960	1291	997
G97R	na	na	na	na	na	na	na	na	na	na	na	na	na	na	na	na	na	na	na	na	955	1474	1255	673	977	899	600	570	1504	1091	na	na	na	na	na	na	na	na	na	na	2903	3163	1381	1420	1730	1664	1329	1884	1182
G97S	na	na	na	na	na	na	na	na	na	na	na	na	na	na	na	na	na	na	na	na	639	1055	997	539	562	533	423	489	1082	788	na	na	na	na	na	na	na	na	na	na	2112	1849	1106	1017	1275	1451	1076	1215	905
G97T	na	na	na	na	na	na	na	na	na	na	na	na	na	na	na	na	na	na	na	na	825	897	925	424	571	609	403	345	765	623	na	na	na	na	na	na	na	na	na	na	1636	2229	895	902	1102	879	845	1075	769
G97V	na	na	na	na	na	na	na	na	na	na	na	na	na	na	na	na	na	na	na	na	484	502	356	116	99	157	46	35	49	55	na	na	na	na	na	na	na	na	na	na	1258	977	313	178	170	213	108	120	66
G97W	na	na	na	na	na	na	na	na	na	na	na	na	na	na	na	na	na	na	na	na	253	310	313	142	76	121	54	23	76	63	na	na	na	na	na	na	na	na	na	na	1107	1226	376	246	257	229	116	117	59
G97Y	na	na	na	na	na	na	na	na	na	na	na	na	na	na	na	na	na	na	na	na	241	345	266	171	111	123	92	52	112	85	na	na	na	na	na	na	na	na	na	na	792	826	368	249	287	209	158	262	93
H114*	na	na	na	na	na	na	na	na	na	na	na	na	na	na	na	na	na	na	na	na	91	7	11	5	10	6	2	3	4	na	na	na	na	na	na	na	na	na	na	na	296	75	16	14	8	14	8	5	5
H114A	na	na	na	na	na	na	na	na	na	na	na	na	na	na	na	na	na	na	na	na	555	981	1165	666	692	994	1195	1323	3163	2127	na	na	na	na	na	na	na	na	na	na	1956	3422	1406	2192	2624	2833	3052	4428	4375
H114C	na	na	na	na	na	na	na	na	na	na	na	na	na	na	na	na	na	na	na	na	97	320	176	117	246	202	223	315	637	423	na	na	na	na	na	na	na	na	na	na	352	847	349	452	653	553	600	952	819
H114D	na	na	na	na	na	na	na	na	na	na	na	na	na	na	na	na	na	na	na	na	226	390	337	156	183	192	240	187	648	368	na	na	na	na	na	na	na	na	na	na	706	734	434	533	587	683	568	808	634
H114E	na	na	na	na	na	na	na	na	na	na	na	na	na	na	na	na	na	na	na	na	408	584	763	407	495	589	660	719	2098	1206	na	na	na	na	na	na	na	na	na	na	1282	1698	994	1338	1837	1779	1821	2755	2668
H114F	na	na	na	na	na	na	na	na	na	na	na	na	na	na	na	na	na	na	na	na	195	318	363	228	185	312	361	383	1066	579	na	na	na	na	na	na	na	na	na	na	740	880	477	661	801	811	859	1273	1166
H114G	na	na	na	na	na	na	na	na	na	na	na	na	na	na	na	na	na	na	na	na	956	1774	2258	1217	1491	1577	1790	1955	5721	3450	na	na	na	na	na	na	na	na	na	na	5126	7476	3284	4296	5541	5356	5727	8514	8278
H114I	na	na	na	na	na	na	na	na	na	na	na	na	na	na	na	na	na	na	na	na	221	405	361	241	294	435	391	727	1130	746	na	na	na	na	na	na	na	na	na	na	686	1038	529	732	971	999	992	1383	1291
H114K	na	na	na	na	na	na	na	na	na	na	na	na	na	na	na	na	na	na	na	na	587	996	1122	640	781	1212	1280	1851	3605	2314	na	na	na	na	na	na	na	na	na	na	1982	2781	1490	2091	2724	3230	3059	4885	4791
H114L	na	na	na	na	na	na	na	na	na	na	na	na	na	na	na	na	na	na	na	na	1041	1910	2248	1073	1299	1548	1974	1936	5806	3598	na	na	na	na	na	na	na	na	na	na	3195	4142	2310	3395	4316	4483	4977	7569	7272
H114M	na	na	na	na	na	na	na	na	na	na	na	na	na	na	na	na	na	na	na	na	363	588	772	401	515	582	605	635	1959	1177	na	na	na	na	na	na	na	na	na	na	1202	1911	882	1275	1578	1741	1640	2821	2486
H114N	na	na	na	na	na	na	na	na	na	na	na	na	na	na	na	na	na	na	na	na	325	547	680	343	462	437	571	698	1939	1121	na	na	na	na	na	na	na	na	na	na	921	1399	659	1034	1392	1456	1405	2392	2102
H114P	na	na	na	na	na	na	na	na	na	na	na	na	na	na	na	na	na	na	na	na	830	368	190	111	102	128	45	28	74	38	na	na	na	na	na	na	na	na	na	na	2905	1165	422	195	214	145	149	227	461
H114Q	na	na	na	na	na	na	na	na	na	na	na	na	na	na	na	na	na	na	na	na	279	516	573	357	330	486	559	533	1744	1096	na	na	na	na	na	na	na	na	na	na	758	1298	620	875	1039	1186	1191	1845	1812
H114R	na	na	na	na	na	na	na	na	na	na	na	na	na	na	na	na	na	na	na	na	952	1844	2470	1052	1335	1585	1858	2096	6016	3663	na	na	na	na	na	na	na	na	na	na	3468	5760	2538	3827	4939	5244	5510	8656	7939
H114S	na	na	na	na	na	na	na	na	na	na	na	na	na	na	na	na	na	na	na	na	735	1532	1816	890	1033	1227	1457	1490	4249	2743	na	na	na	na	na	na	na	na	na	na	2814	2913	1911	2935	3556	4081	4017	6053	5585
H114T	na	na	na	na	na	na	na	na	na	na	na	na	na	na	na	na	na	na	na	na	586	1234	1273	701	869	1027	1214	1227	3506	2139	na	na	na	na	na	na	na	na	na	na	2279	3647	1474	2299	2867	3019	3141	4516	4220
H114V	na	na	na	na	na	na	na	na	na	na	na	na	na	na	na	na	na	na	na	na	829	1436	1726	923	1184	1191	1669	1821	4941	3025	na	na	na	na	na	na	na	na	na	na	2993	4048	2151	3167	4103	4559	4719	7159	6677
H114W	na	na	na	na	na	na	na	na	na	na	na	na	na	na	na	na	na	na	na	na	318	723	558	308	330	446	407	440	1172	681	na	na	na	na	na	na	na	na	na	na	1565	1553	873	1017	1189	1513	1246	1841	1468
H114Y	na	na	na	na	na	na	na	na	na	na	na	na	na	na	na	na	na	na	na	na	198	444	365	216	534	219	261	295	653	475	na	na	na	na	na	na	na	na	na	na	486	879	413	522	653	714	717	983	717
H124*	na	na	na	na	na	na	na	na	na	na	na	na	na	na	na	na	na	na	na	na	na	na	na	na	na	na	na	na	na	na	75	16	8	7	3	na	9	na	2	3	129	27	10	8	14	5	11	na	6
H124A	na	na	na	na	na	na	na	na	na	na	na	na	na	na	na	na	na	na	na	na	na	na	na	na	na	na	na	na	na	na	252	264	134	146	163	129	231	232	291	378	672	846	366	558	536	572	579	895	750
H124C	na	na	na	na	na	na	na	na	na	na	na	na	na	na	na	na	na	na	na	na	na	na	na	na	na	na	na	na	na	na	171	196	63	78	73	61	111	366	136	180	419	435	200	257	290	345	313	438	505
H124D	na	na	na	na	na	na	na	na	na	na	na	na	na	na	na	na	na	na	na	na	na	na	na	na	na	na	na	na	na	na	238	157	69	99	86	77	162	140	100	114	7	435	206	236	252	258	248	356	212
H124E	na	na	na	na	na	na	na	na	na	na	na	na	na	na	na	na	na	na	na	na	na	na	na	na	na	na	na	na	na	na	428	398	132	168	124	115	198	208	189	158	3	852	399	422	501	508	455	523	354
H124F	na	na	na	na	na	na	na	na	na	na	na	na	na	na	na	na	na	na	na	na	na	na	na	na	na	na	na	na	na	na	1233	870	233	319	219	210	239	230	223	142	2840	2069	908	650	825	755	598	659	402
H124G	na	na	na	na	na	na	na	na	na	na	na	na	na	na	na	na	na	na	na	na	na	na	na	na	na	na	na	na	na	na	663	856	430	444	392	348	609	829	893	922	13	15	1085	1212	1624	1549	1651	2597	2251
H124I	na	na	na	na	na	na	na	na	na	na	na	na	na	na	na	na	na	na	na	na	na	na	na	na	na	na	na	na	na	na	193	260	75	82	90	65	91	118	129	122	515	554	236	271	358	354	319	473	370
H124K	na	na	na	na	na	na	na	na	na	na	na	na	na	na	na	na	na	na	na	na	na	na	na	na	na	na	na	na	na	na	817	1078	490	601	458	413	788	887	961	1106	6	2759	1304	1666	1971	1871	1912	2855	2490
H124L	na	na	na	na	na	na	na	na	na	na	na	na	na	na	na	na	na	na	na	na	na	na	na	na	na	na	na	na	na	na	1233	1210	458	433	404	346	551	528	614	474	3051	2928	1345	1250	1604	1462	1389	1625	1290
H124M	na	na	na	na	na	na	na	na	na	na	na	na	na	na	na	na	na	na	na	na	na	na	na	na	na	na	na	na	na	na	283	253	128	148	113	111	151	167	164	157	709	862	302	348	412	422	470	600	464
H124N	na	na	na	na	na	na	na	na	na	na	na	na	na	na	na	na	na	na	na	na	na	na	na	na	na	na	na	na	na	na	7	423	132	213	151	131	207	265	266	215	1003	1027	448	532	638	2081	561	774	635
H124P	na	na	na	na	na	na	na	na	na	na	na	na	na	na	na	na	na	na	na	na	na	na	na	na	na	na	na	na	na	na	788	936	378	513	497	426	748	764	904	972	1897	2519	1161	1415	1726	1754	1552	2372	1990
H124Q	na	na	na	na	na	na	na	na	na	na	na	na	na	na	na	na	na	na	na	na	na	na	na	na	na	na	na	na	na	na	163	202	49	54	58	83	121	141	167	210	3	563	160	208	305	292	244	449	385
H124R	na	na	na	na	na	na	na	na	na	na	na	na	na	na	na	na	na	na	na	na	na	na	na	na	na	na	na	na	na	na	641	823	366	382	402	305	616	712	769	692	1477	13	984	1281	1400	1395	1412	2092	1891
H124S	na	na	na	na	na	na	na	na	na	na	na	na	na	na	na	na	na	na	na	na	na	na	na	na	na	na	na	na	na	na	917	1188	435	518	421	394	713	859	845	848	16	2383	1038	1351	1479	1865	1656	2390	2030
H124T	na	na	na	na	na	na	na	na	na	na	na	na	na	na	na	na	na	na	na	na	na	na	na	na	na	na	na	na	na	na	404	568	172	205	177	199	254	329	360	384	4	1038	497	542	712	738	698	1094	789
H124V	na	na	na	na	na	na	na	na	na	na	na	na	na	na	na	na	na	na	na	na	na	na	na	na	na	na	na	na	na	na	496	489	219	229	208	188	335	378	407	483	15	10	539	602	802	739	733	1212	1023
H124W	na	na	na	na	na	na	na	na	na	na	na	na	na	na	na	na	na	na	na	na	na	na	na	na	na	na	na	na	na	na	208	104	78	46	50	31	44	22	34	21	547	387	152	147	127	123	102	88	60
H124Y	na	na	na	na	na	na	na	na	na	na	na	na	na	na	na	na	na	na	na	na	na	na	na	na	na	na	na	na	na	na	232	150	60	74	40	47	48	35	44	33	551	379	137	160	164	172	112	158	99
H141*	na	na	na	na	na	na	na	na	na	na	na	na	na	na	na	na	na	na	na	na	na	na	na	na	na	na	na	na	na	na	108	20	4	11	1	1	na	na	3	na	144	42	13	14	8	na	8	13	5
H141A	na	na	na	na	na	na	na	na	na	na	na	na	na	na	na	na	na	na	na	na	na	na	na	na	na	na	na	na	na	na	490	550	276	176	161	161	250	247	267	203	15	1313	541	529	594	637	594	762	540
H141C	na	na	na	na	na	na	na	na	na	na	na	na	na	na	na	na	na	na	na	na	na	na	na	na	na	na	na	na	na	na	121	122	27	24	33	33	30	40	25	44	252	261	78	150	97	131	112	122	95
H141D	na	na	na	na	na	na	na	na	na	na	na	na	na	na	na	na	na	na	na	na	na	na	na	na	na	na	na	na	na	na	247	272	31	62	35	28	44	25	35	27	624	571	121	123	55	93	39	47	na
H141E	na	na	na	na	na	na	na	na	na	na	na	na	na	na	na	na	na	na	na	na	na	na	na	na	na	na	na	na	na	na	725	910	220	290	279	207	263	378	360	317	1744	1987	670	674	773	820	711	964	682
H141F	na	na	na	na	na	na	na	na	na	na	na	na	na	na	na	na	na	na	na	na	na	na	na	na	na	na	na	na	na	na	902	1037	276	327	325	232	352	411	391	396	3	2066	768	828	939	1072	951	1201	830
H141G	na	na	na	na	na	na	na	na	na	na	na	na	na	na	na	na	na	na	na	na	na	na	na	na	na	na	na	na	na	na	1944	2250	528	675	523	490	687	782	838	895	3	4189	1593	1725	2083	2029	1970	2584	2092
H141I	na	na	na	na	na	na	na	na	na	na	na	na	na	na	na	na	na	na	na	na	na	na	na	na	na	na	na	na	na	na	405	566	161	152	195	196	287	291	322	331	3	3	384	560	603	561	592	866	722
H141K	na	na	na	na	na	na	na	na	na	na	na	na	na	na	na	na	na	na	na	na	na	na	na	na	na	na	na	na	na	na	671	579	202	222	181	158	257	264	283	229	3	1491	581	615	689	766	624	749	490
H141L	na	na	na	na	na	na	na	na	na	na	na	na	na	na	na	na	na	na	na	na	na	na	na	na	na	na	na	na	na	na	1540	1538	524	551	478	401	672	578	685	645	3522	3769	1228	1440	1611	1487	1429	2048	1441
H141M	na	na	na	na	na	na	na	na	na	na	na	na	na	na	na	na	na	na	na	na	na	na	na	na	na	na	na	na	na	na	376	419	100	142	141	120	143	148	162	169	981	1063	337	403	442	388	400	507	346
H141N	na	na	na	na	na	na	na	na	na	na	na	na	na	na	na	na	na	na	na	na	na	na	na	na	na	na	na	na	na	na	685	844	241	282	237	212	360	329	273	296	1806	4	599	674	780	689	750	1028	632
H141P	na	na	na	na	na	na	na	na	na	na	na	na	na	na	na	na	na	na	na	na	na	na	na	na	na	na	na	na	na	na	1465	1437	308	370	378	270	318	384	310	240	3286	3064	956	1007	960	948	719	760	538
H141Q	na	na	na	na	na	na	na	na	na	na	na	na	na	na	na	na	na	na	na	na	na	na	na	na	na	na	na	na	na	na	334	343	100	93	95	85	104	98	111	105	6	722	226	274	301	301	323	333	249
H141R	na	na	na	na	na	na	na	na	na	na	na	na	na	na	na	na	na	na	na	na	na	na	na	na	na	na	na	na	na	na	2	714	227	208	238	184	291	336	254	275	18	17	633	673	813	693	629	848	615
H141S	na	na	na	na	na	na	na	na	na	na	na	na	na	na	na	na	na	na	na	na	na	na	na	na	na	na	na	na	na	na	777	785	303	294	312	228	367	390	427	415	1792	9	747	824	1024	1078	968	1246	914
H141T	na	na	na	na	na	na	na	na	na	na	na	na	na	na	na	na	na	na	na	na	na	na	na	na	na	na	na	na	na	na	699	840	266	271	277	238	417	402	380	494	7	35	656	707	858	932	858	1198	970
H141V	na	na	na	na	na	na	na	na	na	na	na	na	na	na	na	na	na	na	na	na	na	na	na	na	na	na	na	na	na	na	1145	1468	558	529	485	389	709	715	802	720	4	3221	1236	1293	1503	1579	1489	2141	1599
H141W	na	na	na	na	na	na	na	na	na	na	na	na	na	na	na	na	na	na	na	na	na	na	na	na	na	na	na	na	na	na	435	419	139	155	159	133	174	155	200	188	967	989	365	453	436	538	392	623	423
H141Y	na	na	na	na	na	na	na	na	na	na	na	na	na	na	na	na	na	na	na	na	na	na	na	na	na	na	na	na	na	na	2	206	28	54	38	44	65	48	78	53	458	3	149	141	157	97	137	126	99
H149*	na	na	na	na	na	na	na	na	na	na	na	na	na	na	na	na	na	na	na	na	na	na	na	na	na	na	na	na	na	na	96	20	6	5	3	na	4	3	na	2	137	39	10	7	7	27	5	10	na
H149A	na	na	na	na	na	na	na	na	na	na	na	na	na	na	na	na	na	na	na	na	na	na	na	na	na	na	na	na	na	na	344	254	71	86	66	57	54	64	56	55	5	587	226	212	252	218	148	151	136
H149C	na	na	na	na	na	na	na	na	na	na	na	na	na	na	na	na	na	na	na	na	na	na	na	na	na	na	na	na	na	na	176	145	46	49	46	38	56	36	56	44	434	386	121	133	150	135	100	164	156
H149D	na	na	na	na	na	na	na	na	na	na	na	na	na	na	na	na	na	na	na	na	na	na	na	na	na	na	na	na	na	na	142	203	45	55	74	27	41	21	45	12	411	384	110	123	132	74	86	170	84
H149E	na	na	na	na	na	na	na	na	na	na	na	na	na	na	na	na	na	na	na	na	na	na	na	na	na	na	na	na	na	na	294	230	77	101	67	81	84	107	102	59	781	651	252	223	223	187	195	301	179
H149F	na	na	na	na	na	na	na	na	na	na	na	na	na	na	na	na	na	na	na	na	na	na	na	na	na	na	na	na	na	na	392	240	38	62	39	28	27	17	14	11	1034	435	148	116	61	65	41	33	31
H149G	na	na	na	na	na	na	na	na	na	na	na	na	na	na	na	na	na	na	na	na	na	na	na	na	na	na	na	na	na	na	1115	1129	245	333	277	187	258	239	219	197	2896	2519	811	710	850	860	585	665	492
H149I	na	na	na	na	na	na	na	na	na	na	na	na	na	na	na	na	na	na	na	na	na	na	na	na	na	na	na	na	na	na	232	161	41	59	32	28	40	38	29	17	587	432	172	122	124	144	86	65	56
H149K	na	na	na	na	na	na	na	na	na	na	na	na	na	na	na	na	na	na	na	na	na	na	na	na	na	na	na	na	na	na	416	430	168	142	108	111	132	123	131	108	1126	870	367	323	337	375	269	395	276
H149L	na	na	na	na	na	na	na	na	na	na	na	na	na	na	na	na	na	na	na	na	na	na	na	na	na	na	na	na	na	na	2	670	138	203	83	79	66	41	58	70	3358	1380	327	248	253	244	107	124	58
H149M	na	na	na	na	na	na	na	na	na	na	na	na	na	na	na	na	na	na	na	na	na	na	na	na	na	na	na	na	na	na	225	190	50	57	28	18	35	19	13	5	664	486	100	84	61	75	38	28	23
H149N	na	na	na	na	na	na	na	na	na	na	na	na	na	na	na	na	na	na	na	na	na	na	na	na	na	na	na	na	na	na	314	328	94	90	74	53	95	62	119	97	780	20	235	201	287	175	199	275	183
H149P	na	na	na	na	na	na	na	na	na	na	na	na	na	na	na	na	na	na	na	na	na	na	na	na	na	na	na	na	na	na	1200	1545	483	588	510	451	813	1041	1007	1090	3189	3324	1219	1457	1825	2015	1782	2879	2398
H149Q	na	na	na	na	na	na	na	na	na	na	na	na	na	na	na	na	na	na	na	na	na	na	na	na	na	na	na	na	na	na	359	334	72	110	56	46	63	56	54	27	696	688	177	148	192	208	155	148	65
H149R	na	na	na	na	na	na	na	na	na	na	na	na	na	na	na	na	na	na	na	na	na	na	na	na	na	na	na	na	na	na	817	987	280	262	247	192	315	317	348	288	3	1851	616	668	713	742	653	871	801
H149S	na	na	na	na	na	na	na	na	na	na	na	na	na	na	na	na	na	na	na	na	na	na	na	na	na	na	na	na	na	na	595	582	118	122	126	78	87	83	63	44	1524	939	336	263	307	247	180	179	174
H149T	na	na	na	na	na	na	na	na	na	na	na	na	na	na	na	na	na	na	na	na	na	na	na	na	na	na	na	na	na	na	461	573	194	208	219	169	190	235	283	241	1244	1205	479	539	634	683	650	831	612
H149V	na	na	na	na	na	na	na	na	na	na	na	na	na	na	na	na	na	na	na	na	na	na	na	na	na	na	na	na	na	na	589	700	166	251	213	168	258	366	332	276	1430	7	525	589	671	786	570	945	779
H149W	na	na	na	na	na	na	na	na	na	na	na	na	na	na	na	na	na	na	na	na	na	na	na	na	na	na	na	na	na	na	334	316	39	53	28	15	34	18	10	41	924	418	126	97	83	43	23	26	20
H149Y	na	na	na	na	na	na	na	na	na	na	na	na	na	na	na	na	na	na	na	na	na	na	na	na	na	na	na	na	na	na	123	25	na	na	2	2	na	na	na	na	275	19	na	na	na	4	na	na	na
H45*	101	2	4	3	na	na	1	na	na	na	88	11	7	1	11	na	3	na	2	na	na	na	na	na	na	na	na	na	na	na	83	15	5	4	1	2	na	na	na	na	na	na	na	na	na	na	na	na	na
H45A	4	595	309	186	291	311	386	675	545	777	307	345	163	185	185	720	430	310	632	669	na	na	na	na	na	na	na	na	na	na	373	665	161	160	115	136	226	318	345	396	na	na	na	na	na	na	na	na	na
H45C	438	536	178	107	210	92	95	134	60	113	335	238	142	88	121	283	102	74	166	58	na	na	na	na	na	na	na	na	na	na	507	463	111	114	68	75	69	71	78	72	na	na	na	na	na	na	na	na	na
H45D	362	700	199	107	124	100	125	168	110	104	195	327	99	181	126	107	75	168	135	56	na	na	na	na	na	na	na	na	na	na	392	570	95	104	74	65	67	43	74	33	na	na	na	na	na	na	na	na	na
H45E	630	738	356	276	219	147	152	182	95	81	238	388	129	821	179	290	185	136	203	167	na	na	na	na	na	na	na	na	na	na	362	572	94	115	95	91	84	87	89	63	na	na	na	na	na	na	na	na	na
H45F	2	1162	586	302	439	377	178	450	121	270	601	680	422	408	325	720	284	193	347	262	na	na	na	na	na	na	na	na	na	na	1048	1239	273	307	219	199	238	620	218	143	na	na	na	na	na	na	na	na	na
H45G	2	3692	1910	1170	1597	1254	1094	1922	1382	2113	1280	1547	865	1332	904	1956	1538	1945	1777	1619	na	na	na	na	na	na	na	na	na	na	1694	2408	608	667	628	484	815	796	854	870	na	na	na	na	na	na	na	na	na
H45I	341	4	125	81	160	37	40	16	5	33	287	215	112	200	88	367	113	40	52	52	na	na	na	na	na	na	na	na	na	na	477	286	54	69	46	39	28	26	23	29	na	na	na	na	na	na	na	na	na
H45K	1060	1138	558	283	344	223	237	370	123	130	1329	639	330	416	334	444	323	178	293	613	na	na	na	na	na	na	na	na	na	na	980	910	182	215	189	142	153	147	131	94	na	na	na	na	na	na	na	na	na
H45L	2407	3576	1076	553	525	588	390	567	236	318	2	1367	885	717	671	1721	630	416	602	566	na	na	na	na	na	na	na	na	na	na	1883	1951	361	469	336	254	321	362	289	235	na	na	na	na	na	na	na	na	na
H45M	717	1002	336	188	294	277	179	421	141	164	600	421	183	225	195	331	420	164	229	290	na	na	na	na	na	na	na	na	na	na	267	324	47	70	54	58	51	58	46	47	na	na	na	na	na	na	na	na	na
H45N	741	941	454	232	378	263	316	728	296	469	470	487	236	474	289	509	413	353	448	703	na	na	na	na	na	na	na	na	na	na	773	890	165	251	166	185	211	231	262	276	na	na	na	na	na	na	na	na	na
H45P	1596	2	1354	1067	1498	1257	1439	3519	1724	3391	995	1337	1072	700	953	1542	1636	1282	2127	3418	na	na	na	na	na	na	na	na	na	na	1322	2061	431	626	588	490	896	1051	1102	1343	na	na	na	na	na	na	na	na	na
H45Q	2	1498	507	456	479	433	461	1107	307	619	1	595	393	237	372	1394	434	358	651	740	na	na	na	na	na	na	na	na	na	na	759	1048	228	257	240	182	241	297	323	279	na	na	na	na	na	na	na	na	na
H45R	2	2666	1163	640	728	688	481	729	251	379	1	1384	784	841	676	1432	809	498	648	908	na	na	na	na	na	na	na	na	na	na	2379	2435	448	537	429	330	419	339	375	204	na	na	na	na	na	na	na	na	na
H45S	890	2	889	671	946	1056	1074	1966	1859	2941	683	799	439	1368	611	984	1242	984	1708	2354	na	na	na	na	na	na	na	na	na	na	1055	1703	360	390	495	434	853	1071	1268	1592	na	na	na	na	na	na	na	na	na
H45T	725	2	570	427	415	894	718	1654	1351	1994	454	663	372	382	364	663	1099	654	1021	1866	na	na	na	na	na	na	na	na	na	na	680	935	226	267	262	257	386	553	672	728	na	na	na	na	na	na	na	na	na
H45V	795	711	263	113	189	120	109	36	45	45	724	500	386	184	176	328	113	81	117	97	na	na	na	na	na	na	na	na	na	na	605	455	68	120	73	67	64	36	37	24	na	na	na	na	na	na	na	na	na
H45W	2	9	651	391	603	414	259	567	249	343	1034	580	523	293	314	770	346	307	396	293	na	na	na	na	na	na	na	na	na	na	1072	1364	298	315	236	199	218	260	303	220	na	na	na	na	na	na	na	na	na
H45Y	4	2	314	150	201	167	125	90	85	137	2	313	189	144	141	195	100	103	126	2369	na	na	na	na	na	na	na	na	na	na	490	601	133	128	102	86	88	92	84	78	na	na	na	na	na	na	na	na	na
I115*	na	na	na	na	na	na	na	na	na	na	na	na	na	na	na	na	na	na	na	na	164	15	4	3	na	2	2	5	na	na	na	na	na	na	na	na	na	na	na	na	235	30	19	13	10	13	8	11	5
I115A	na	na	na	na	na	na	na	na	na	na	na	na	na	na	na	na	na	na	na	na	305	750	385	228	276	323	326	296	675	487	na	na	na	na	na	na	na	na	na	na	1223	1363	647	728	970	866	776	1059	1079
I115C	na	na	na	na	na	na	na	na	na	na	na	na	na	na	na	na	na	na	na	na	193	191	205	137	112	167	168	228	402	267	na	na	na	na	na	na	na	na	na	na	528	768	305	327	415	442	417	593	436
I115D	na	na	na	na	na	na	na	na	na	na	na	na	na	na	na	na	na	na	na	na	107	10	4	na	8	3	na	na	na	na	na	na	na	na	na	na	na	na	na	na	223	60	16	5	10	8	8	5	14
I115E	na	na	na	na	na	na	na	na	na	na	na	na	na	na	na	na	na	na	na	na	259	14	16	11	4	5	4	19	9	3	na	na	na	na	na	na	na	na	na	na	594	219	41	36	21	20	14	38	34
I115F	na	na	na	na	na	na	na	na	na	na	na	na	na	na	na	na	na	na	na	na	789	821	630	376	370	516	490	498	1171	754	na	na	na	na	na	na	na	na	na	na	2244	2786	1110	983	1416	1126	1018	1569	1374
I115G	na	na	na	na	na	na	na	na	na	na	na	na	na	na	na	na	na	na	na	na	859	496	434	193	181	195	102	100	124	148	na	na	na	na	na	na	na	na	na	na	2950	1685	600	373	417	405	280	276	260
I115H	na	na	na	na	na	na	na	na	na	na	na	na	na	na	na	na	na	na	na	na	281	351	289	147	129	210	163	101	387	264	na	na	na	na	na	na	na	na	na	na	950	743	378	391	434	443	404	485	408
I115K	na	na	na	na	na	na	na	na	na	na	na	na	na	na	na	na	na	na	na	na	329	45	31	13	10	10	16	6	na	3	na	na	na	na	na	na	na	na	na	na	567	204	68	33	51	12	39	14	18
I115L	na	na	na	na	na	na	na	na	na	na	na	na	na	na	na	na	na	na	na	na	1353	946	682	344	322	299	183	119	319	247	na	na	na	na	na	na	na	na	na	na	4360	2800	1170	744	833	822	564	426	254
I115M	na	na	na	na	na	na	na	na	na	na	na	na	na	na	na	na	na	na	na	na	374	393	379	222	212	235	252	288	596	435	na	na	na	na	na	na	na	na	na	na	1217	1347	461	503	810	713	593	820	611
I115N	na	na	na	na	na	na	na	na	na	na	na	na	na	na	na	na	na	na	na	na	324	267	148	84	76	107	78	104	256	167	na	na	na	na	na	na	na	na	na	na	847	840	319	234	331	198	150	264	200
I115P	na	na	na	na	na	na	na	na	na	na	na	na	na	na	na	na	na	na	na	na	781	216	221	74	81	59	41	51	29	27	na	na	na	na	na	na	na	na	na	na	2005	678	285	117	206	228	99	183	308
I115Q	na	na	na	na	na	na	na	na	na	na	na	na	na	na	na	na	na	na	na	na	296	235	168	116	102	172	84	71	296	145	na	na	na	na	na	na	na	na	na	na	1008	831	344	263	301	283	235	252	243
I115R	na	na	na	na	na	na	na	na	na	na	na	na	na	na	na	na	na	na	na	na	616	202	131	40	36	33	14	12	10	15	na	na	na	na	na	na	na	na	na	na	1607	578	218	103	82	60	31	35	16
I115S	na	na	na	na	na	na	na	na	na	na	na	na	na	na	na	na	na	na	na	na	732	684	643	441	481	551	622	687	1731	1175	na	na	na	na	na	na	na	na	na	na	2075	2461	993	1293	1695	1714	1390	2521	2235
I115T	na	na	na	na	na	na	na	na	na	na	na	na	na	na	na	na	na	na	na	na	693	858	892	511	528	653	666	610	1673	1134	na	na	na	na	na	na	na	na	na	na	1786	3367	1014	1265	1557	1589	1544	2027	1844
I115V	na	na	na	na	na	na	na	na	na	na	na	na	na	na	na	na	na	na	na	na	629	850	720	431	580	498	507	546	1150	850	na	na	na	na	na	na	na	na	na	na	2338	2704	1137	1323	1566	1377	1316	1707	1356
I115W	na	na	na	na	na	na	na	na	na	na	na	na	na	na	na	na	na	na	na	na	374	335	264	154	135	172	123	119	260	217	na	na	na	na	na	na	na	na	na	na	1088	1402	414	348	443	442	267	437	322
I115Y	na	na	na	na	na	na	na	na	na	na	na	na	na	na	na	na	na	na	na	na	183	226	193	120	84	121	85	67	178	164	na	na	na	na	na	na	na	na	na	na	654	554	228	226	302	206	248	293	225
I14*	142	53	11	4	3	21	5	na	3	na	168	38	9	38	4	na	5	2	3	4	190	24	na	3	2	13	2	na	12	4	na	na	na	na	na	na	na	na	na	na	na	na	na	na	na	na	na	na	na
I14A	504	821	506	140	157	129	190	363	318	496	169	527	90	151	170	112	212	229	322	323	454	683	418	222	226	245	274	309	808	553	na	na	na	na	na	na	na	na	na	na	na	na	na	na	na	na	na	na	na
I14C	213	337	130	52	73	45	62	187	88	221	118	191	125	37	70	76	76	85	107	155	169	335	177	87	79	137	85	133	352	218	na	na	na	na	na	na	na	na	na	na	na	na	na	na	na	na	na	na	na
I14D	57	8	8	5	4	na	2	na	na	na	98	19	13	2	na	na	na	na	na	na	83	4	5	na	na	4	3	na	na	11	na	na	na	na	na	na	na	na	na	na	na	na	na	na	na	na	na	na	na
I14E	163	50	9	8	7	na	2	na	2	2	129	45	26	7	9	3	na	2	2	3	206	29	47	3	3	4	na	4	8	na	na	na	na	na	na	na	na	na	na	na	na	na	na	na	na	na	na	na	na
I14F	30	2	na	na	na	6	5	na	21	23	142	1	na	na	1	2	na	6	10	8	1	2	na	na	na	na	na	12	7	10	na	na	na	na	na	na	na	na	na	na	na	na	na	na	na	na	na	na	na
I14G	805	406	110	44	42	8	13	29	4	22	673	489	123	124	64	53	10	18	8	31	854	575	151	52	32	50	17	33	39	20	na	na	na	na	na	na	na	na	na	na	na	na	na	na	na	na	na	na	na
I14H	184	53	11	6	4	na	3	na	na	na	132	52	27	5	2	na	na	na	5	na	179	29	17	2	2	8	5	4	9	na	na	na	na	na	na	na	na	na	na	na	na	na	na	na	na	na	na	na	na
I14K	235	42	23	4	10	na	3	na	na	7	357	32	32	4	9	25	3	12	12	7	343	65	13	4	11	7	4	na	13	9	na	na	na	na	na	na	na	na	na	na	na	na	na	na	na	na	na	na	na
I14L	2673	5250	1497	1113	1516	1659	1585	3967	2268	5032	1065	1	1016	651	1029	1934	1790	1948	2579	3760	2184	3608	2326	1356	1552	1860	2492	2657	8137	5269	na	na	na	na	na	na	na	na	na	na	na	na	na	na	na	na	na	na	na
I14M	544	910	290	109	80	78	167	308	146	333	340	573	124	102	149	60	128	204	202	234	524	833	450	231	180	284	246	187	513	394	na	na	na	na	na	na	na	na	na	na	na	na	na	na	na	na	na	na	na
I14N	269	226	na	na	2	na	6	na	na	na	204	7	na	na	5	4	na	na	3	na	2	4	na	na	45	na	na	na	na	na	na	na	na	na	na	na	na	na	na	na	na	na	na	na	na	na	na	na	na
I14P	594	120	63	71	19	11	3	7	5	5	485	107	66	16	35	18	22	2	6	na	689	68	40	20	49	15	3	12	25	3	na	na	na	na	na	na	na	na	na	na	na	na	na	na	na	na	na	na	na
I14Q	422	268	109	47	33	5	10	21	3	na	326	243	65	36	44	79	10	9	11	16	427	263	121	43	28	50	18	15	14	13	na	na	na	na	na	na	na	na	na	na	na	na	na	na	na	na	na	na	na
I14R	458	110	60	25	13	na	7	na	na	19	454	76	15	46	7	2	2	4	5	20	645	137	49	13	5	18	8	5	13	10	na	na	na	na	na	na	na	na	na	na	na	na	na	na	na	na	na	na	na
I14S	563	544	178	61	69	20	47	2	24	27	302	392	94	181	48	92	48	37	33	12	559	617	229	90	75	116	54	44	63	80	na	na	na	na	na	na	na	na	na	na	na	na	na	na	na	na	na	na	na
I14T	656	1057	158	89	111	131	42	109	98	107	409	1	172	309	83	216	109	51	92	75	2	1	252	131	236	169	97	68	198	169	na	na	na	na	na	na	na	na	na	na	na	na	na	na	na	na	na	na	na
I14V	963	1895	532	524	483	491	548	1579	613	1024	478	5	251	187	308	307	635	460	705	904	3	958	1021	466	623	623	779	702	2302	1463	na	na	na	na	na	na	na	na	na	na	na	na	na	na	na	na	na	na	na
I14W	120	27	8	4	na	na	na	na	na	8	515	50	na	na	2	24	na	6	na	na	149	22	6	5	4	3	3	na	4	5	na	na	na	na	na	na	na	na	na	na	na	na	na	na	na	na	na	na	na
I14Y	74	21	5	5	2	3	na	na	na	na	38	15	3	4	2	8	na	na	na	na	71	7	na	2	na	na	3	na	na	4	na	na	na	na	na	na	na	na	na	na	na	na	na	na	na	na	na	na	na
I155*	na	na	na	na	na	na	na	na	na	na	na	na	na	na	na	na	na	na	na	na	na	na	na	na	na	na	na	na	na	na	98	23	1	10	2	5	3	na	na	5	171	53	15	12	12	4	7	8	12
I155A	na	na	na	na	na	na	na	na	na	na	na	na	na	na	na	na	na	na	na	na	na	na	na	na	na	na	na	na	na	na	390	515	192	155	133	137	140	185	207	153	947	944	369	439	478	480	434	581	485
I155C	na	na	na	na	na	na	na	na	na	na	na	na	na	na	na	na	na	na	na	na	na	na	na	na	na	na	na	na	na	na	145	158	87	59	56	46	71	81	80	81	298	302	149	130	178	146	148	216	171
I155D	na	na	na	na	na	na	na	na	na	na	na	na	na	na	na	na	na	na	na	na	na	na	na	na	na	na	na	na	na	na	230	57	24	20	16	8	8	20	8	18	467	196	44	32	37	19	20	15	18
I155E	na	na	na	na	na	na	na	na	na	na	na	na	na	na	na	na	na	na	na	na	na	na	na	na	na	na	na	na	na	na	431	405	145	158	150	143	209	177	224	194	1088	1144	449	405	510	542	509	684	517
I155F	na	na	na	na	na	na	na	na	na	na	na	na	na	na	na	na	na	na	na	na	na	na	na	na	na	na	na	na	na	na	347	441	105	138	129	85	164	115	165	166	769	737	250	277	409	337	369	347	347
I155G	na	na	na	na	na	na	na	na	na	na	na	na	na	na	na	na	na	na	na	na	na	na	na	na	na	na	na	na	na	na	1443	1327	352	427	315	236	340	397	357	258	3685	11	1008	871	831	705	527	709	544
I155H	na	na	na	na	na	na	na	na	na	na	na	na	na	na	na	na	na	na	na	na	na	na	na	na	na	na	na	na	na	na	285	382	90	107	106	97	105	123	156	138	672	615	286	274	335	249	277	343	276
I155K	na	na	na	na	na	na	na	na	na	na	na	na	na	na	na	na	na	na	na	na	na	na	na	na	na	na	na	na	na	na	513	777	212	210	216	175	279	265	304	259	5	12	451	579	633	667	609	800	610
I155L	na	na	na	na	na	na	na	na	na	na	na	na	na	na	na	na	na	na	na	na	na	na	na	na	na	na	na	na	na	na	868	1431	451	435	330	306	439	602	507	444	2059	2190	770	1005	1307	1152	989	1470	966
I155M	na	na	na	na	na	na	na	na	na	na	na	na	na	na	na	na	na	na	na	na	na	na	na	na	na	na	na	na	na	na	313	348	100	125	90	146	123	96	152	123	755	812	275	302	408	395	309	484	363
I155N	na	na	na	na	na	na	na	na	na	na	na	na	na	na	na	na	na	na	na	na	na	na	na	na	na	na	na	na	na	na	474	439	118	126	116	108	125	128	117	101	8	28	314	344	319	314	253	320	202
I155P	na	na	na	na	na	na	na	na	na	na	na	na	na	na	na	na	na	na	na	na	na	na	na	na	na	na	na	na	na	na	400	93	13	23	16	18	19	17	8	28	689	164	63	41	22	31	23	30	53
I155Q	na	na	na	na	na	na	na	na	na	na	na	na	na	na	na	na	na	na	na	na	na	na	na	na	na	na	na	na	na	na	215	204	109	115	93	92	151	122	127	113	558	630	245	276	316	302	283	451	251
I155R	na	na	na	na	na	na	na	na	na	na	na	na	na	na	na	na	na	na	na	na	na	na	na	na	na	na	na	na	na	na	704	896	260	342	310	285	400	487	457	533	1666	1919	734	879	956	1135	909	1252	983
I155S	na	na	na	na	na	na	na	na	na	na	na	na	na	na	na	na	na	na	na	na	na	na	na	na	na	na	na	na	na	na	502	647	153	215	160	123	193	198	257	212	1195	12	393	423	457	496	387	515	468
I155T	na	na	na	na	na	na	na	na	na	na	na	na	na	na	na	na	na	na	na	na	na	na	na	na	na	na	na	na	na	na	398	494	132	158	170	126	197	190	178	205	926	1021	357	419	459	502	424	627	435
I155V	na	na	na	na	na	na	na	na	na	na	na	na	na	na	na	na	na	na	na	na	na	na	na	na	na	na	na	na	na	na	729	813	279	350	301	230	306	372	399	350	1770	1845	773	731	946	950	871	1238	839
I155W	na	na	na	na	na	na	na	na	na	na	na	na	na	na	na	na	na	na	na	na	na	na	na	na	na	na	na	na	na	na	349	375	127	172	146	107	193	227	241	297	979	822	376	281	365	370	359	533	454
I155Y	na	na	na	na	na	na	na	na	na	na	na	na	na	na	na	na	na	na	na	na	na	na	na	na	na	na	na	na	na	na	196	228	60	90	91	73	96	102	105	104	485	455	191	266	254	229	191	292	223
I2*	3	na	na	na	na	na	na	na	na	na	na	na	na	na	na	na	na	na	na	na	12	na	na	na	na	na	na	na	na	na	na	na	na	na	na	na	na	na	na	na	na	na	na	na	na	na	na	na	na
I2A	4	3	na	na	na	na	na	na	na	na	19	na	na	na	na	na	na	na	na	na	8	na	na	na	na	na	na	na	na	na	na	na	na	na	na	na	na	na	na	na	na	na	na	na	na	na	na	na	na
I2C	3	5	2	na	4	na	na	na	na	2	4	8	na	3	3	8	na	na	na	na	3	2	9	2	na	na	2	na	na	na	na	na	na	na	na	na	na	na	na	na	na	na	na	na	na	na	na	na	na
I2D	3	2	na	na	na	na	na	na	na	na	na	na	na	na	na	na	na	na	na	na	8	na	na	na	na	na	na	na	na	na	na	na	na	na	na	na	na	na	na	na	na	na	na	na	na	na	na	na	na
I2E	5	na	2	na	na	na	na	3	na	na	8	3	4	na	na	na	na	na	na	na	10	3	na	na	na	na	na	na	na	na	na	na	na	na	na	na	na	na	na	na	na	na	na	na	na	na	na	na	na
I2F	2	2	2	2	na	na	3	na	na	2	2	4	na	1	1	na	na	na	na	na	6	8	na	na	na	2	na	na	na	na	na	na	na	na	na	na	na	na	na	na	na	na	na	na	na	na	na	na	na
I2G	9	na	na	na	na	na	na	na	na	na	7	na	na	1	na	na	na	na	na	na	18	na	na	na	na	na	na	na	na	na	na	na	na	na	na	na	na	na	na	na	na	na	na	na	na	na	na	na	na
I2H	14	16	12	6	na	na	15	2	12	10	1	25	8	3	na	na	3	4	3	10	26	47	4	7	8	11	5	12	31	14	na	na	na	na	na	na	na	na	na	na	na	na	na	na	na	na	na	na	na
I2K	190	245	64	44	47	79	66	185	70	143	111	146	51	30	96	66	50	45	100	116	174	189	144	96	98	85	93	92	271	180	na	na	na	na	na	na	na	na	na	na	na	na	na	na	na	na	na	na	na
I2L	28	13	9	na	2	na	1	na	na	na	9	9	74	2	3	na	2	na	na	5	33	2	9	8	2	na	4	10	na	na	na	na	na	na	na	na	na	na	na	na	na	na	na	na	na	na	na	na	na
I2M	352	495	108	152	93	174	95	158	125	113	225	334	447	128	87	68	125	71	78	89	1	484	329	166	143	170	157	190	391	274	na	na	na	na	na	na	na	na	na	na	na	na	na	na	na	na	na	na	na
I2N	50	117	na	2	4	33	7	17	38	69	2	4	na	2	5	2	15	94	14	na	2	24	na	na	27	45	29	na	148	71	na	na	na	na	na	na	na	na	na	na	na	na	na	na	na	na	na	na	na
I2P	25	9	5	na	na	7	na	na	na	na	9	na	na	na	na	na	na	na	2	2	16	7	na	na	na	na	na	3	na	na	na	na	na	na	na	na	na	na	na	na	na	na	na	na	na	na	na	na	na
I2Q	10	3	3	na	na	na	na	na	na	na	11	11	na	1	na	na	na	na	na	na	8	na	na	3	na	2	na	na	na	na	na	na	na	na	na	na	na	na	na	na	na	na	na	na	na	na	na	na	na
I2R	384	226	72	30	46	12	17	25	2	9	133	159	28	20	13	67	11	8	11	5	342	280	117	60	28	55	10	12	24	13	na	na	na	na	na	na	na	na	na	na	na	na	na	na	na	na	na	na	na
I2S	7	2	na	na	4	na	na	na	na	na	84	1	na	7	na	na	na	na	na	na	64	na	na	na	na	na	na	na	na	na	na	na	na	na	na	na	na	na	na	na	na	na	na	na	na	na	na	na	na
I2T	143	176	49	22	24	9	21	18	4	10	88	4	10	23	35	168	182	15	14	17	2	2	77	42	51	37	32	33	32	21	na	na	na	na	na	na	na	na	na	na	na	na	na	na	na	na	na	na	na
I2V	33	22	15	na	2	4	4	2	na	na	20	3	6	10	4	na	na	na	na	na	1	2	8	8	2	8	na	na	na	4	na	na	na	na	na	na	na	na	na	na	na	na	na	na	na	na	na	na	na
I2W	2	7	2	na	8	na	na	na	na	5	13	na	na	1	2	136	na	na	na	na	14	9	na	5	na	3	na	na	na	na	na	na	na	na	na	na	na	na	na	na	na	na	na	na	na	na	na	na	na
I2Y	6	13	na	na	4	na	4	na	na	na	1	6	na	na	na	na	3	na	na	10	10	42	3	4	20	11	na	5	14	na	na	na	na	na	na	na	na	na	na	na	na	na	na	na	na	na	na	na	na
I41*	467	18	7	3	11	na	2	na	4	4	761	29	33	3	25	na	25	4	5	8	na	na	na	na	na	na	na	na	na	na	82	41	5	5	6	7	2	4	na	2	na	na	na	na	na	na	na	na	na
I41A	1818	3028	1485	1091	3067	1419	1672	3538	1952	3951	1043	1437	1125	821	930	1561	1777	1482	2397	3547	na	na	na	na	na	na	na	na	na	na	1449	2236	656	730	689	615	1114	1271	1441	2007	na	na	na	na	na	na	na	na	na
I41C	321	562	288	413	541	199	321	792	627	861	179	347	928	187	178	462	357	361	531	762	na	na	na	na	na	na	na	na	na	na	292	509	111	172	146	132	202	323	367	433	na	na	na	na	na	na	na	na	na
I41D	136	8	9	na	17	11	2	28	na	na	230	16	9	na	7	18	7	na	4	5	na	na	na	na	na	na	na	na	na	na	104	18	1	4	6	2	3	3	6	na	na	na	na	na	na	na	na	na	na
I41E	253	31	25	14	35	5	2	48	3	9	438	69	201	47	33	61	8	9	9	28	na	na	na	na	na	na	na	na	na	na	272	89	28	8	13	8	13	17	16	19	na	na	na	na	na	na	na	na	na
I41F	2	8	278	226	270	276	138	337	265	253	1	338	132	140	145	244	220	130	293	381	na	na	na	na	na	na	na	na	na	na	371	381	108	131	117	104	123	151	165	121	na	na	na	na	na	na	na	na	na
I41G	796	407	176	92	70	56	47	69	22	10	744	412	280	196	104	55	48	43	71	29	na	na	na	na	na	na	na	na	na	na	831	369	65	80	56	44	58	43	58	67	na	na	na	na	na	na	na	na	na
I41H	192	24	12	na	26	na	na	na	na	na	389	40	30	89	28	16	19	77	5	2	na	na	na	na	na	na	na	na	na	na	170	46	9	13	6	5	11	8	19	51	na	na	na	na	na	na	na	na	na
I41K	2	55	21	8	11	9	9	14	na	33	360	41	154	76	30	22	7	4	9	11	na	na	na	na	na	na	na	na	na	na	298	84	11	16	9	8	17	13	7	12	na	na	na	na	na	na	na	na	na
I41L	2397	2	1584	1142	1284	1468	997	2275	857	1284	1598	1524	817	1315	893	1221	1256	1112	1370	1706	na	na	na	na	na	na	na	na	na	na	2388	3007	620	776	657	501	735	840	880	829	na	na	na	na	na	na	na	na	na
I41M	989	949	577	328	497	315	370	523	297	386	616	513	410	254	308	317	383	356	409	856	na	na	na	na	na	na	na	na	na	na	845	1089	262	256	232	201	257	270	254	200	na	na	na	na	na	na	na	na	na
I41N	380	275	109	45	65	10	12	41	2	16	3	156	110	71	57	96	56	11	25	14	na	na	na	na	na	na	na	na	na	na	336	204	29	40	35	21	29	15	8	6	na	na	na	na	na	na	na	na	na
I41P	619	234	87	49	45	19	13	12	na	13	671	199	149	138	84	70	18	8	12	32	na	na	na	na	na	na	na	na	na	na	504	218	35	38	25	16	14	14	17	12	na	na	na	na	na	na	na	na	na
I41Q	270	49	47	5	22	7	4	14	2	20	239	87	56	83	65	15	6	7	26	8	na	na	na	na	na	na	na	na	na	na	307	66	21	23	7	5	4	6	9	5	na	na	na	na	na	na	na	na	na
I41R	559	63	37	5	34	12	8	na	3	4	751	57	48	32	18	10	7	7	9	31	na	na	na	na	na	na	na	na	na	na	444	84	15	24	13	16	17	17	5	4	na	na	na	na	na	na	na	na	na
I41S	1246	902	498	192	358	220	152	445	81	212	993	633	423	332	326	458	291	218	213	172	na	na	na	na	na	na	na	na	na	na	1065	778	169	202	169	105	149	113	109	96	na	na	na	na	na	na	na	na	na
I41T	959	1540	760	646	693	791	631	833	596	1008	1	755	422	293	580	607	633	534	816	771	na	na	na	na	na	na	na	na	na	na	981	1390	297	404	290	342	499	521	503	562	na	na	na	na	na	na	na	na	na
I41V	2751	2	1983	1774	2296	1969	2014	4314	2493	5183	1	2039	1565	836	1200	5187	1818	2088	2788	4456	na	na	na	na	na	na	na	na	na	na	2769	3798	884	1027	928	855	1545	1933	2103	2542	na	na	na	na	na	na	na	na	na
I41W	6	302	174	63	76	27	43	46	26	34	1014	357	345	170	117	256	817	84	83	145	na	na	na	na	na	na	na	na	na	na	852	369	57	87	59	49	47	69	94	151	na	na	na	na	na	na	na	na	na
I41Y	293	145	198	58	33	62	15	na	19	7	272	126	50	51	49	75	25	61	29	19	na	na	na	na	na	na	na	na	na	na	294	115	24	34	13	15	12	11	23	34	na	na	na	na	na	na	na	na	na
I5*	120	53	7	3	9	na	1	2	na	na	148	19	5	2	2	na	4	2	na	na	185	14	67	7	2	4	2	na	na	na	na	na	na	na	na	na	na	na	na	na	na	na	na	na	na	na	na	na	na
I50*	124	17	8	9	na	na	1	8	na	2	263	21	11	15	3	na	3	4	5	na	na	na	na	na	na	na	na	na	na	na	122	31	5	11	8	4	na	6	na	na	na	na	na	na	na	na	na	na	na
I50A	391	460	200	86	53	47	60	266	26	88	330	316	92	173	89	184	145	104	166	100	na	na	na	na	na	na	na	na	na	na	408	341	56	88	63	48	47	70	66	45	na	na	na	na	na	na	na	na	na
I50C	119	121	61	38	68	27	33	78	62	170	63	85	33	22	61	58	39	34	85	35	na	na	na	na	na	na	na	na	na	na	165	129	29	32	37	30	37	43	39	54	na	na	na	na	na	na	na	na	na
I50D	25	4	na	na	na	na	3	na	na	3	119	8	30	na	3	na	na	3	na	2	na	na	na	na	na	na	na	na	na	na	52	8	1	na	1	1	na	na	na	na	na	na	na	na	na	na	na	na	na
I50E	336	55	27	6	22	25	5	na	na	na	610	130	46	28	28	1582	13	9	21	26	na	na	na	na	na	na	na	na	na	na	372	111	16	22	14	4	9	6	10	2	na	na	na	na	na	na	na	na	na
I50F	63	82	43	13	34	na	3	9	7	2	1	83	4	5	14	2	5	37	20	4	na	na	na	na	na	na	na	na	na	na	124	117	17	na	9	3	6	3	15	3	na	na	na	na	na	na	na	na	na
I50G	1538	388	180	84	168	20	27	45	15	7	1	663	454	256	231	250	51	32	87	23	na	na	na	na	na	na	na	na	na	na	2226	715	109	85	78	51	62	26	24	16	na	na	na	na	na	na	na	na	na
I50H	35	17	6	10	na	11	2	na	5	na	1	21	9	2	10	na	na	2	2	na	na	na	na	na	na	na	na	na	na	na	26	21	5	na	4	na	na	na	2	na	na	na	na	na	na	na	na	na	na
I50K	188	54	45	16	37	130	na	na	na	na	206	89	76	78	20	73	4	8	6	19	na	na	na	na	na	na	na	na	na	na	284	111	21	17	10	10	4	4	4	2	na	na	na	na	na	na	na	na	na
I50L	1474	2	1331	1076	1445	995	1194	2889	1664	3586	950	1079	514	601	701	1579	1175	1212	1799	2531	na	na	na	na	na	na	na	na	na	na	1570	2482	546	675	570	602	1016	1339	1420	1798	na	na	na	na	na	na	na	na	na
I50M	593	994	368	273	491	337	361	658	336	620	275	456	164	144	208	415	473	318	456	526	na	na	na	na	na	na	na	na	na	na	645	872	161	218	138	172	254	289	330	335	na	na	na	na	na	na	na	na	na
I50N	2	2	2	na	na	na	3	na	na	na	1	4	na	4	3	na	na	2	na	na	na	na	na	na	na	na	na	na	na	na	9	na	na	na	3	2	na	na	na	na	na	na	na	na	na	na	na	na	na
I50P	117	3	2	5	2	na	na	na	na	4	226	14	10	4	na	na	na	4	na	na	na	na	na	na	na	na	na	na	na	na	53	12	1	na	2	1	na	na	na	na	na	na	na	na	na	na	na	na	na
I50Q	134	156	79	45	88	14	14	6	8	15	424	212	849	60	26	80	14	9	46	23	na	na	na	na	na	na	na	na	na	na	223	151	43	32	21	10	25	20	20	12	na	na	na	na	na	na	na	na	na
I50R	1277	664	241	102	69	65	65	43	22	42	1185	516	362	253	181	2384	241	46	71	38	na	na	na	na	na	na	na	na	na	na	1160	551	106	95	59	46	38	39	43	17	na	na	na	na	na	na	na	na	na
I50S	351	237	92	26	35	70	9	11	17	3	277	175	118	78	34	88	293	20	31	22	na	na	na	na	na	na	na	na	na	na	400	219	26	34	18	16	9	11	11	3	na	na	na	na	na	na	na	na	na
I50T	284	322	101	70	167	45	75	104	41	73	123	147	77	66	54	64	103	94	93	61	na	na	na	na	na	na	na	na	na	na	196	185	50	42	26	29	19	43	40	23	na	na	na	na	na	na	na	na	na
I50V	977	2	519	774	402	359	396	752	366	445	861	639	395	497	365	977	545	772	515	666	na	na	na	na	na	na	na	na	na	na	1219	1262	372	294	273	229	258	301	356	342	na	na	na	na	na	na	na	na	na
I50W	444	64	25	17	5	51	9	22	na	na	927	131	85	35	32	64	24	8	4	11	na	na	na	na	na	na	na	na	na	na	349	68	22	7	18	5	4	2	3	na	na	na	na	na	na	na	na	na	na
I50Y	46	35	9	14	2	na	na	na	na	na	94	23	4	7	2	na	na	2	na	na	na	na	na	na	na	na	na	na	na	na	100	25	2	5	na	3	na	na	na	na	na	na	na	na	na	na	na	na	na
I5A	442	386	148	38	5	18	12	29	2	9	257	279	97	44	81	21	13	6	10	21	404	555	118	69	37	45	21	13	14	21	na	na	na	na	na	na	na	na	na	na	na	na	na	na	na	na	na	na	na
I5C	164	179	51	26	34	12	17	22	2	9	27	160	59	51	33	4	16	20	17	32	118	1	71	47	34	60	28	17	67	29	na	na	na	na	na	na	na	na	na	na	na	na	na	na	na	na	na	na	na
I5D	126	50	7	4	2	na	na	na	2	na	189	29	7	na	1	6	4	2	na	na	144	10	13	2	3	na	6	na	na	36	na	na	na	na	na	na	na	na	na	na	na	na	na	na	na	na	na	na	na
I5E	341	118	40	11	8	98	9	21	8	2	324	139	62	25	19	8	4	11	5	25	452	292	46	8	14	9	11	26	12	17	na	na	na	na	na	na	na	na	na	na	na	na	na	na	na	na	na	na	na
I5F	285	521	119	61	31	65	52	113	37	66	105	1	53	45	64	41	56	250	57	69	2	1	223	116	114	150	94	109	224	193	na	na	na	na	na	na	na	na	na	na	na	na	na	na	na	na	na	na	na
I5G	774	238	69	26	50	42	15	na	7	31	733	245	101	16	47	84	21	14	19	17	984	256	74	39	23	21	19	18	32	32	na	na	na	na	na	na	na	na	na	na	na	na	na	na	na	na	na	na	na
I5H	633	537	157	74	99	29	21	109	9	25	334	453	203	145	89	77	67	18	38	24	622	600	242	125	106	123	37	36	77	68	na	na	na	na	na	na	na	na	na	na	na	na	na	na	na	na	na	na	na
I5K	697	437	118	60	40	17	25	103	6	24	457	314	93	43	28	178	18	16	17	22	782	555	131	89	37	36	24	13	26	26	na	na	na	na	na	na	na	na	na	na	na	na	na	na	na	na	na	na	na
I5L	1092	1370	533	243	176	170	207	395	127	270	793	1021	253	266	211	320	245	182	273	228	1052	1048	646	402	303	465	238	238	616	558	na	na	na	na	na	na	na	na	na	na	na	na	na	na	na	na	na	na	na
I5M	360	457	163	30	24	22	29	18	na	2	156	1	109	87	40	44	16	25	14	33	335	449	179	67	38	78	22	5	21	71	na	na	na	na	na	na	na	na	na	na	na	na	na	na	na	na	na	na	na
I5N	1225	824	228	111	76	104	40	84	32	27	748	2	128	165	84	385	112	31	43	43	4	3	338	195	109	148	55	26	86	67	na	na	na	na	na	na	na	na	na	na	na	na	na	na	na	na	na	na	na
I5P	486	102	39	17	27	6	8	na	13	37	471	96	50	15	18	2	5	14	15	na	550	96	33	32	9	16	9	6	22	13	na	na	na	na	na	na	na	na	na	na	na	na	na	na	na	na	na	na	na
I5Q	286	276	77	29	18	12	19	15	na	6	147	161	45	45	37	10	5	54	4	8	269	219	110	40	23	22	9	13	6	19	na	na	na	na	na	na	na	na	na	na	na	na	na	na	na	na	na	na	na
I5R	400	100	28	12	5	na	5	16	2	12	362	166	112	60	19	na	7	na	7	5	454	74	35	13	18	11	9	5	9	na	na	na	na	na	na	na	na	na	na	na	na	na	na	na	na	na	na	na	na
I5S	613	334	104	63	29	32	1	na	3	na	335	369	64	56	54	42	3	12	7	16	577	293	122	68	34	24	8	6	11	20	na	na	na	na	na	na	na	na	na	na	na	na	na	na	na	na	na	na	na
I5T	744	337	118	38	30	17	9	32	3	4	328	1	99	44	25	42	12	13	9	8	2	3	162	37	25	42	11	8	6	20	na	na	na	na	na	na	na	na	na	na	na	na	na	na	na	na	na	na	na
I5V	790	690	241	51	58	62	26	71	3	21	481	1	130	104	111	82	86	18	31	50	1	2	376	130	59	98	23	14	41	44	na	na	na	na	na	na	na	na	na	na	na	na	na	na	na	na	na	na	na
I5W	175	64	10	6	16	5	5	5	na	4	140	52	10	3	5	na	na	na	na	na	177	19	8	4	3	7	2	na	na	na	na	na	na	na	na	na	na	na	na	na	na	na	na	na	na	na	na	na	na
I5Y	233	204	61	19	37	16	10	119	2	15	145	152	49	14	23	113	27	24	15	14	228	183	95	47	28	40	20	15	33	32	na	na	na	na	na	na	na	na	na	na	na	na	na	na	na	na	na	na	na
I60*	165	10	4	4	4	3	na	na	na	na	217	18	7	2	2	na	3	3	8	5	na	na	na	na	na	na	na	na	na	na	77	15	5	4	3	2	10	2	2	na	na	na	na	na	na	na	na	na	na
I60A	1389	8	852	554	786	685	605	955	539	787	926	1131	445	486	441	664	843	487	795	851	na	na	na	na	na	na	na	na	na	na	1207	1578	287	397	343	303	383	469	511	461	na	na	na	na	na	na	na	na	na
I60C	393	580	329	162	175	230	163	254	292	265	557	245	135	105	101	464	185	910	275	352	na	na	na	na	na	na	na	na	na	na	358	521	108	134	128	121	189	196	205	218	na	na	na	na	na	na	na	na	na
I60D	71	11	5	2	na	na	14	na	na	na	182	15	15	4	7	2	2	3	8	2	na	na	na	na	na	na	na	na	na	na	72	19	2	5	6	1	na	5	6	18	na	na	na	na	na	na	na	na	na
I60E	312	171	78	9	29	7	9	99	3	7	514	219	111	106	44	30	11	12	14	45	na	na	na	na	na	na	na	na	na	na	474	231	29	28	27	17	11	27	11	17	na	na	na	na	na	na	na	na	na
I60F	481	599	313	179	248	162	199	666	283	544	3	261	119	125	174	266	254	183	371	503	na	na	na	na	na	na	na	na	na	na	373	412	166	142	138	109	169	227	258	269	na	na	na	na	na	na	na	na	na
I60G	2245	1491	1454	268	270	151	183	169	97	68	1960	1411	802	714	408	511	463	242	370	187	na	na	na	na	na	na	na	na	na	na	2760	1539	286	338	199	169	218	186	149	122	na	na	na	na	na	na	na	na	na
I60H	360	547	291	283	127	158	162	141	129	265	1	361	158	86	148	170	167	137	188	194	na	na	na	na	na	na	na	na	na	na	320	438	64	101	83	51	93	100	102	91	na	na	na	na	na	na	na	na	na
I60K	474	403	183	124	83	111	64	43	48	12	558	312	154	158	96	155	48	49	57	63	na	na	na	na	na	na	na	na	na	na	492	451	62	91	56	50	59	72	35	30	na	na	na	na	na	na	na	na	na
I60L	1460	2239	1333	709	1958	839	1060	1634	1012	1495	1	1309	371	525	517	647	1150	756	1156	1079	na	na	na	na	na	na	na	na	na	na	1344	2075	462	497	380	412	609	692	716	837	na	na	na	na	na	na	na	na	na
I60M	334	538	233	168	224	3357	231	399	230	411	1	348	128	75	114	294	252	254	256	279	na	na	na	na	na	na	na	na	na	na	346	465	155	128	111	106	172	186	186	195	na	na	na	na	na	na	na	na	na
I60N	385	606	294	151	174	159	78	221	86	112	618	358	152	353	228	186	176	83	121	87	na	na	na	na	na	na	na	na	na	na	416	433	90	111	90	69	74	79	81	42	na	na	na	na	na	na	na	na	na
I60P	255	64	19	3	10	14	1	na	na	15	507	47	25	13	11	9	4	11	7	22	na	na	na	na	na	na	na	na	na	na	181	56	10	8	7	2	4	4	3	na	na	na	na	na	na	na	na	na	na
I60Q	440	393	238	138	105	43	61	87	32	51	462	302	99	114	129	491	74	189	96	83	na	na	na	na	na	na	na	na	na	na	390	363	53	88	50	49	81	51	51	30	na	na	na	na	na	na	na	na	na
I60R	1222	883	551	142	127	98	82	110	30	36	1166	602	524	219	175	197	325	84	161	66	na	na	na	na	na	na	na	na	na	na	1302	702	137	124	108	84	99	63	54	26	na	na	na	na	na	na	na	na	na
I60S	1103	1299	589	504	325	356	251	321	240	327	1	815	505	540	353	1025	285	285	441	332	na	na	na	na	na	na	na	na	na	na	1051	1054	208	244	225	140	181	180	199	165	na	na	na	na	na	na	na	na	na
I60T	601	4	412	249	268	294	218	375	186	280	1	472	171	162	209	528	348	243	423	932	na	na	na	na	na	na	na	na	na	na	463	726	147	175	147	130	186	135	153	147	na	na	na	na	na	na	na	na	na
I60V	2	2066	820	536	688	512	595	890	615	952	4	926	504	547	439	7377	714	569	922	1028	na	na	na	na	na	na	na	na	na	na	1373	2072	413	500	397	391	558	582	624	684	na	na	na	na	na	na	na	na	na
I60W	790	701	468	167	242	161	183	277	182	369	1	447	201	198	242	404	390	180	274	460	na	na	na	na	na	na	na	na	na	na	760	847	184	222	155	135	197	185	223	178	na	na	na	na	na	na	na	na	na
I60Y	292	449	200	139	143	200	174	399	293	395	145	260	89	122	112	150	185	160	286	378	na	na	na	na	na	na	na	na	na	na	302	419	102	102	93	85	128	179	196	222	na	na	na	na	na	na	na	na	na
I61*	23	3	2	6	na	2	2	na	na	na	112	5	3	2	na	na	na	na	na	na	na	na	na	na	na	na	na	na	na	na	42	14	4	na	2	1	na	na	3	na	na	na	na	na	na	na	na	na	na
I61A	257	431	138	82	92	56	82	60	43	86	212	198	50	505	72	93	94	145	90	77	na	na	na	na	na	na	na	na	na	na	263	331	83	75	54	53	54	34	63	27	na	na	na	na	na	na	na	na	na
I61C	147	290	222	79	78	156	80	147	96	180	181	136	34	44	77	117	74	48	122	117	na	na	na	na	na	na	na	na	na	na	189	215	49	65	65	44	60	89	86	90	na	na	na	na	na	na	na	na	na
I61D	37	2	na	na	na	na	na	na	na	13	81	1	6	3	4	na	na	na	na	na	na	na	na	na	na	na	na	na	na	na	30	8	3	2	2	2	2	na	na	na	na	na	na	na	na	na	na	na	na
I61E	54	13	na	na	5	na	na	na	na	na	194	25	20	15	9	17	na	na	na	na	na	na	na	na	na	na	na	na	na	na	114	12	6	3	4	2	2	15	18	30	na	na	na	na	na	na	na	na	na
I61F	214	2	59	na	114	4	53	47	2	na	211	189	48	44	51	na	2	43	na	16	na	na	na	na	na	na	na	na	na	na	247	245	16	18	11	15	2	2	8	16	na	na	na	na	na	na	na	na	na
I61G	1315	1597	681	367	416	317	255	454	193	206	700	831	398	330	331	297	312	360	363	309	na	na	na	na	na	na	na	na	na	na	1538	1646	358	392	286	285	305	271	267	225	na	na	na	na	na	na	na	na	na
I61H	193	65	16	3	10	na	na	na	3	3	218	69	43	18	64	2	2	5	2	4	na	na	na	na	na	na	na	na	na	na	152	38	10	5	7	4	9	6	8	15	na	na	na	na	na	na	na	na	na
I61K	281	133	76	16	27	14	4	na	na	5	170	89	48	38	14	18	14	na	25	53	na	na	na	na	na	na	na	na	na	na	252	113	23	28	15	20	18	17	9	5	na	na	na	na	na	na	na	na	na
I61L	873	1231	661	450	803	485	628	1068	691	1158	514	588	286	461	448	585	654	514	775	1124	na	na	na	na	na	na	na	na	na	na	870	1418	287	381	324	290	446	665	644	856	na	na	na	na	na	na	na	na	na
I61M	201	304	99	87	102	75	77	235	116	277	71	161	70	41	88	128	111	117	119	231	na	na	na	na	na	na	na	na	na	na	211	358	50	78	56	62	107	119	125	125	na	na	na	na	na	na	na	na	na
I61N	2	3	33	29	4	na	1	12	3	2	103	110	33	15	9	37	na	na	na	2	na	na	na	na	na	na	na	na	na	na	197	2	3	na	3	3	na	na	na	na	na	na	na	na	na	na	na	na	na
I61P	332	202	92	57	24	23	14	37	11	21	562	197	222	75	196	197	14	15	19	18	na	na	na	na	na	na	na	na	na	na	438	195	40	33	23	22	8	10	9	na	na	na	na	na	na	na	na	na	na
I61Q	148	107	28	10	5	14	16	41	2	2	189	71	47	32	53	12	14	5	17	na	na	na	na	na	na	na	na	na	na	na	217	100	17	27	13	7	7	15	8	7	na	na	na	na	na	na	na	na	na
I61R	891	514	198	101	102	103	45	99	30	78	958	378	239	271	140	66	112	232	113	113	na	na	na	na	na	na	na	na	na	na	746	609	116	125	90	58	82	72	82	61	na	na	na	na	na	na	na	na	na
I61S	513	434	242	132	75	172	115	157	12	109	422	258	190	162	132	143	170	169	112	106	na	na	na	na	na	na	na	na	na	na	458	511	95	114	108	70	90	51	64	23	na	na	na	na	na	na	na	na	na
I61T	333	363	161	39	81	57	40	84	84	36	427	232	351	49	89	25	25	38	20	16	na	na	na	na	na	na	na	na	na	na	357	313	34	45	36	44	29	24	17	15	na	na	na	na	na	na	na	na	na
I61V	505	418	175	122	164	166	104	161	148	117	3	310	466	75	148	180	128	278	140	137	na	na	na	na	na	na	na	na	na	na	397	518	119	135	87	86	107	134	131	117	na	na	na	na	na	na	na	na	na
I61W	90	51	12	10	35	na	5	na	5	na	353	58	268	32	24	136	6	9	12	5	na	na	na	na	na	na	na	na	na	na	225	73	9	11	9	6	7	4	4	6	na	na	na	na	na	na	na	na	na
I61Y	221	192	86	50	55	26	37	54	22	28	150	131	37	30	50	51	30	14	37	45	na	na	na	na	na	na	na	na	na	na	160	147	41	35	30	29	39	40	32	23	na	na	na	na	na	na	na	na	na
I82*	na	na	na	na	na	na	na	na	na	na	na	na	na	na	na	na	na	na	na	na	244	5	12	2	8	4	4	2	na	na	na	na	na	na	na	na	na	na	na	na	357	92	33	24	12	12	10	9	6
I82A	na	na	na	na	na	na	na	na	na	na	na	na	na	na	na	na	na	na	na	na	462	532	565	262	490	432	462	410	1110	587	na	na	na	na	na	na	na	na	na	na	1247	1401	512	576	759	791	713	1122	875
I82C	na	na	na	na	na	na	na	na	na	na	na	na	na	na	na	na	na	na	na	na	38	24	100	38	15	39	28	63	91	64	na	na	na	na	na	na	na	na	na	na	105	146	48	59	49	70	54	81	61
I82D	na	na	na	na	na	na	na	na	na	na	na	na	na	na	na	na	na	na	na	na	84	161	127	74	70	83	87	76	181	538	na	na	na	na	na	na	na	na	na	na	356	369	129	130	156	161	159	153	110
I82E	na	na	na	na	na	na	na	na	na	na	na	na	na	na	na	na	na	na	na	na	1268	1681	1617	898	983	1148	1045	1124	2735	1736	na	na	na	na	na	na	na	na	na	na	3969	4982	1459	1612	2057	2256	1931	2577	2103
I82F	na	na	na	na	na	na	na	na	na	na	na	na	na	na	na	na	na	na	na	na	34	43	na	28	na	na	90	24	31	12	na	na	na	na	na	na	na	na	na	na	94	96	na	na	na	na	na	na	na
I82G	na	na	na	na	na	na	na	na	na	na	na	na	na	na	na	na	na	na	na	na	4274	4981	4990	2703	3155	3712	3410	2648	6985	4659	na	na	na	na	na	na	na	na	na	na	12881	15475	4665	5037	6350	5951	5028	6581	4426
I82H	na	na	na	na	na	na	na	na	na	na	na	na	na	na	na	na	na	na	na	na	73	60	53	41	52	56	58	36	125	87	na	na	na	na	na	na	na	na	na	na	136	187	55	65	92	86	78	109	69
I82K	na	na	na	na	na	na	na	na	na	na	na	na	na	na	na	na	na	na	na	na	486	698	809	367	424	523	545	564	1409	905	na	na	na	na	na	na	na	na	na	na	2144	2417	794	929	1034	1085	1085	1496	1130
I82L	na	na	na	na	na	na	na	na	na	na	na	na	na	na	na	na	na	na	na	na	757	826	951	431	555	548	535	587	1317	840	na	na	na	na	na	na	na	na	na	na	2170	2877	846	939	1087	1105	989	1285	925
I82M	na	na	na	na	na	na	na	na	na	na	na	na	na	na	na	na	na	na	na	na	573	718	641	410	516	447	485	455	1174	786	na	na	na	na	na	na	na	na	na	na	1968	2181	803	875	1064	902	924	1215	960
I82N	na	na	na	na	na	na	na	na	na	na	na	na	na	na	na	na	na	na	na	na	18	5	na	2	2	2	na	na	na	5	na	na	na	na	na	na	na	na	na	na	12	31	na	na	na	na	na	na	na
I82P	na	na	na	na	na	na	na	na	na	na	na	na	na	na	na	na	na	na	na	na	165	217	156	70	57	76	52	102	134	125	na	na	na	na	na	na	na	na	na	na	416	305	135	124	187	155	98	112	89
I82Q	na	na	na	na	na	na	na	na	na	na	na	na	na	na	na	na	na	na	na	na	427	389	442	238	340	308	277	220	798	500	na	na	na	na	na	na	na	na	na	na	1072	1277	454	408	536	562	493	705	597
I82R	na	na	na	na	na	na	na	na	na	na	na	na	na	na	na	na	na	na	na	na	1144	1500	1487	839	805	1038	1007	956	2495	1666	na	na	na	na	na	na	na	na	na	na	4145	4519	1545	1713	2097	1958	1882	2569	2110
I82S	na	na	na	na	na	na	na	na	na	na	na	na	na	na	na	na	na	na	na	na	182	228	247	127	117	155	214	216	436	231	na	na	na	na	na	na	na	na	na	na	531	503	195	239	318	289	279	419	398
I82T	na	na	na	na	na	na	na	na	na	na	na	na	na	na	na	na	na	na	na	na	250	211	270	178	197	237	214	200	470	378	na	na	na	na	na	na	na	na	na	na	592	1103	253	305	304	382	334	545	362
I82V	na	na	na	na	na	na	na	na	na	na	na	na	na	na	na	na	na	na	na	na	759	1072	1032	467	606	654	689	645	1635	997	na	na	na	na	na	na	na	na	na	na	2515	3316	764	1005	1252	1267	1154	1683	1246
I82W	na	na	na	na	na	na	na	na	na	na	na	na	na	na	na	na	na	na	na	na	386	464	435	280	366	359	342	414	931	590	na	na	na	na	na	na	na	na	na	na	1283	1164	493	588	701	890	673	952	914
I82Y	na	na	na	na	na	na	na	na	na	na	na	na	na	na	na	na	na	na	na	na	103	127	191	65	69	98	72	77	207	108	na	na	na	na	na	na	na	na	na	na	238	183	105	96	115	145	126	165	103
I91*	na	na	na	na	na	na	na	na	na	na	na	na	na	na	na	na	na	na	na	na	119	1	8	6	na	na	4	na	5	na	na	na	na	na	na	na	na	na	na	na	177	3	8	8	8	5	4	na	na
I91A	na	na	na	na	na	na	na	na	na	na	na	na	na	na	na	na	na	na	na	na	433	530	453	259	304	355	488	552	1708	1018	na	na	na	na	na	na	na	na	na	na	951	1199	464	607	791	876	893	1593	1715
I91C	na	na	na	na	na	na	na	na	na	na	na	na	na	na	na	na	na	na	na	na	27	53	34	35	31	42	64	62	147	83	na	na	na	na	na	na	na	na	na	na	156	108	76	75	73	85	81	140	129
I91D	na	na	na	na	na	na	na	na	na	na	na	na	na	na	na	na	na	na	na	na	198	101	63	22	38	23	6	4	7	8	na	na	na	na	na	na	na	na	na	na	606	212	70	28	44	28	18	19	23
I91E	na	na	na	na	na	na	na	na	na	na	na	na	na	na	na	na	na	na	na	na	337	298	368	165	191	227	162	142	195	178	na	na	na	na	na	na	na	na	na	na	1325	1433	306	358	409	394	262	296	163
I91F	na	na	na	na	na	na	na	na	na	na	na	na	na	na	na	na	na	na	na	na	43	176	na	na	na	9	15	5	33	19	na	na	na	na	na	na	na	na	na	na	99	122	na	na	na	na	23	63	na
I91G	na	na	na	na	na	na	na	na	na	na	na	na	na	na	na	na	na	na	na	na	1524	1627	1778	1021	1240	1372	1768	2170	6719	3872	na	na	na	na	na	na	na	na	na	na	4397	4607	1956	2657	3225	3736	3952	7107	7088
I91H	na	na	na	na	na	na	na	na	na	na	na	na	na	na	na	na	na	na	na	na	145	139	89	70	84	93	89	75	139	107	na	na	na	na	na	na	na	na	na	na	329	300	116	143	141	223	114	120	180
I91K	na	na	na	na	na	na	na	na	na	na	na	na	na	na	na	na	na	na	na	na	877	943	979	612	600	750	777	800	1570	1091	na	na	na	na	na	na	na	na	na	na	3004	2762	1071	1177	1456	1438	1339	1930	1557
I91L	na	na	na	na	na	na	na	na	na	na	na	na	na	na	na	na	na	na	na	na	186	154	154	116	223	162	186	194	449	333	na	na	na	na	na	na	na	na	na	na	609	897	224	265	378	357	314	584	495
I91M	na	na	na	na	na	na	na	na	na	na	na	na	na	na	na	na	na	na	na	na	306	349	388	240	276	306	386	415	976	654	na	na	na	na	na	na	na	na	na	na	981	960	372	499	700	701	672	1291	1032
I91N	na	na	na	na	na	na	na	na	na	na	na	na	na	na	na	na	na	na	na	na	929	1012	983	456	914	666	673	677	1506	971	na	na	na	na	na	na	na	na	na	na	2429	3730	874	960	1659	1253	1042	1610	1060
I91P	na	na	na	na	na	na	na	na	na	na	na	na	na	na	na	na	na	na	na	na	108	98	105	70	55	83	90	104	286	133	na	na	na	na	na	na	na	na	na	na	351	462	135	152	168	204	163	265	222
I91Q	na	na	na	na	na	na	na	na	na	na	na	na	na	na	na	na	na	na	na	na	40	72	38	32	74	30	29	23	70	46	na	na	na	na	na	na	na	na	na	na	150	112	54	50	56	55	49	75	81
I91R	na	na	na	na	na	na	na	na	na	na	na	na	na	na	na	na	na	na	na	na	358	385	500	245	264	240	289	397	754	433	na	na	na	na	na	na	na	na	na	na	1328	943	486	506	618	637	587	724	581
I91S	na	na	na	na	na	na	na	na	na	na	na	na	na	na	na	na	na	na	na	na	273	430	403	238	272	336	392	501	1155	822	na	na	na	na	na	na	na	na	na	na	1104	941	442	489	790	772	742	1346	1233
I91T	na	na	na	na	na	na	na	na	na	na	na	na	na	na	na	na	na	na	na	na	386	507	463	265	233	354	505	508	1228	789	na	na	na	na	na	na	na	na	na	na	1232	1363	507	574	769	811	820	1205	1211
I91V	na	na	na	na	na	na	na	na	na	na	na	na	na	na	na	na	na	na	na	na	328	340	320	196	147	277	368	478	1021	533	na	na	na	na	na	na	na	na	na	na	1007	1503	327	439	534	630	630	1112	725
I91W	na	na	na	na	na	na	na	na	na	na	na	na	na	na	na	na	na	na	na	na	79	105	131	67	66	102	88	131	290	173	na	na	na	na	na	na	na	na	na	na	423	247	142	187	230	231	207	429	300
I91Y	na	na	na	na	na	na	na	na	na	na	na	na	na	na	na	na	na	na	na	na	144	146	129	79	93	89	106	227	255	190	na	na	na	na	na	na	na	na	na	na	450	461	150	170	224	241	197	359	233
I94*	na	na	na	na	na	na	na	na	na	na	na	na	na	na	na	na	na	na	na	na	150	12	na	4	na	2	na	na	na	na	na	na	na	na	na	na	na	na	na	na	72	26	4	na	9	na	na	na	na
I94A	na	na	na	na	na	na	na	na	na	na	na	na	na	na	na	na	na	na	na	na	300	316	224	158	150	135	109	76	206	137	na	na	na	na	na	na	na	na	na	na	905	1061	286	241	253	388	239	280	161
I94C	na	na	na	na	na	na	na	na	na	na	na	na	na	na	na	na	na	na	na	na	94	72	86	34	43	54	44	23	75	53	na	na	na	na	na	na	na	na	na	na	382	459	97	101	94	92	89	95	85
I94D	na	na	na	na	na	na	na	na	na	na	na	na	na	na	na	na	na	na	na	na	95	13	5	na	na	na	na	na	na	na	na	na	na	na	na	na	na	na	na	na	109	91	3	na	5	9	na	na	na
I94E	na	na	na	na	na	na	na	na	na	na	na	na	na	na	na	na	na	na	na	na	175	16	9	7	4	3	na	na	4	na	na	na	na	na	na	na	na	na	na	na	325	121	22	15	11	7	8	na	26
I94F	na	na	na	na	na	na	na	na	na	na	na	na	na	na	na	na	na	na	na	na	137	33	20	12	4	6	na	2	na	na	na	na	na	na	na	na	na	na	na	na	299	99	16	17	na	4	4	na	na
I94G	na	na	na	na	na	na	na	na	na	na	na	na	na	na	na	na	na	na	na	na	919	659	601	283	218	247	159	130	187	195	na	na	na	na	na	na	na	na	na	na	3688	2555	741	624	569	431	300	300	193
I94H	na	na	na	na	na	na	na	na	na	na	na	na	na	na	na	na	na	na	na	na	260	17	14	7	2	6	6	3	na	8	na	na	na	na	na	na	na	na	na	na	362	23	32	10	11	9	4	13	na
I94K	na	na	na	na	na	na	na	na	na	na	na	na	na	na	na	na	na	na	na	na	387	24	13	6	9	8	4	6	4	5	na	na	na	na	na	na	na	na	na	na	583	104	54	31	12	5	21	6	5
I94L	na	na	na	na	na	na	na	na	na	na	na	na	na	na	na	na	na	na	na	na	935	1285	1141	658	738	812	844	785	2632	1724	na	na	na	na	na	na	na	na	na	na	2856	3012	1123	1298	1757	1735	1738	2944	2637
I94M	na	na	na	na	na	na	na	na	na	na	na	na	na	na	na	na	na	na	na	na	251	273	202	147	147	185	157	116	316	240	na	na	na	na	na	na	na	na	na	na	686	671	279	276	334	293	282	373	261
I94N	na	na	na	na	na	na	na	na	na	na	na	na	na	na	na	na	na	na	na	na	827	427	364	213	265	118	65	102	120	83	na	na	na	na	na	na	na	na	na	na	2308	1684	460	227	233	228	113	111	57
I94P	na	na	na	na	na	na	na	na	na	na	na	na	na	na	na	na	na	na	na	na	1329	383	327	196	147	127	98	53	94	75	na	na	na	na	na	na	na	na	na	na	3502	1749	447	269	225	223	124	153	196
I94Q	na	na	na	na	na	na	na	na	na	na	na	na	na	na	na	na	na	na	na	na	195	142	143	67	86	97	77	87	167	158	na	na	na	na	na	na	na	na	na	na	689	529	233	166	198	223	148	187	140
I94R	na	na	na	na	na	na	na	na	na	na	na	na	na	na	na	na	na	na	na	na	277	18	20	4	na	3	na	na	na	3	na	na	na	na	na	na	na	na	na	na	378	78	32	23	na	14	9	5	4
I94S	na	na	na	na	na	na	na	na	na	na	na	na	na	na	na	na	na	na	na	na	830	847	603	459	338	433	262	209	469	396	na	na	na	na	na	na	na	na	na	na	2953	2448	743	654	685	676	533	619	376
I94T	na	na	na	na	na	na	na	na	na	na	na	na	na	na	na	na	na	na	na	na	938	781	671	409	309	488	314	309	591	538	na	na	na	na	na	na	na	na	na	na	2560	2178	730	684	795	787	602	744	555
I94V	na	na	na	na	na	na	na	na	na	na	na	na	na	na	na	na	na	na	na	na	374	503	357	216	231	273	243	191	614	361	na	na	na	na	na	na	na	na	na	na	1334	1546	512	471	612	658	529	775	512
I94W	na	na	na	na	na	na	na	na	na	na	na	na	na	na	na	na	na	na	na	na	188	9	5	2	4	na	6	17	4	na	na	na	na	na	na	na	na	na	na	na	186	28	19	na	5	12	5	11	na
I94Y	na	na	na	na	na	na	na	na	na	na	na	na	na	na	na	na	na	na	na	na	73	8	3	5	3	na	2	na	na	na	na	na	na	na	na	na	na	na	na	na	111	12	8	5	8	na	na	na	6
K106*	na	na	na	na	na	na	na	na	na	na	na	na	na	na	na	na	na	na	na	na	84	2	9	na	na	na	na	na	na	na	na	na	na	na	na	na	na	na	na	na	100	55	13	10	7	7	na	na	na
K106A	na	na	na	na	na	na	na	na	na	na	na	na	na	na	na	na	na	na	na	na	165	222	221	117	97	143	163	118	308	210	na	na	na	na	na	na	na	na	na	na	607	639	258	284	357	429	324	553	321
K106C	na	na	na	na	na	na	na	na	na	na	na	na	na	na	na	na	na	na	na	na	16	13	16	6	12	13	12	3	33	20	na	na	na	na	na	na	na	na	na	na	85	38	23	23	30	15	24	39	34
K106D	na	na	na	na	na	na	na	na	na	na	na	na	na	na	na	na	na	na	na	na	72	93	72	45	34	52	44	33	111	67	na	na	na	na	na	na	na	na	na	na	191	299	98	99	135	112	113	175	133
K106E	na	na	na	na	na	na	na	na	na	na	na	na	na	na	na	na	na	na	na	na	295	354	392	233	257	300	277	357	632	460	na	na	na	na	na	na	na	na	na	na	1353	1490	510	605	795	721	750	954	738
K106F	na	na	na	na	na	na	na	na	na	na	na	na	na	na	na	na	na	na	na	na	11	34	25	13	20	32	36	19	79	47	na	na	na	na	na	na	na	na	na	na	101	100	43	52	42	44	66	96	41
K106G	na	na	na	na	na	na	na	na	na	na	na	na	na	na	na	na	na	na	na	na	788	1105	971	556	664	684	733	720	1759	1182	na	na	na	na	na	na	na	na	na	na	3499	3196	1378	1691	2081	2048	1983	2940	2287
K106H	na	na	na	na	na	na	na	na	na	na	na	na	na	na	na	na	na	na	na	na	234	138	169	79	76	97	123	84	336	246	na	na	na	na	na	na	na	na	na	na	384	380	187	212	301	371	272	441	372
K106I	na	na	na	na	na	na	na	na	na	na	na	na	na	na	na	na	na	na	na	na	90	209	107	59	53	94	88	90	218	106	na	na	na	na	na	na	na	na	na	na	301	381	116	156	196	213	204	215	205
K106L	na	na	na	na	na	na	na	na	na	na	na	na	na	na	na	na	na	na	na	na	350	332	389	215	520	238	207	235	535	332	na	na	na	na	na	na	na	na	na	na	1218	1686	477	544	620	715	570	799	487
K106M	na	na	na	na	na	na	na	na	na	na	na	na	na	na	na	na	na	na	na	na	256	320	279	157	117	196	198	143	339	240	na	na	na	na	na	na	na	na	na	na	900	1221	432	381	464	482	442	472	343
K106N	na	na	na	na	na	na	na	na	na	na	na	na	na	na	na	na	na	na	na	na	150	167	143	69	74	88	101	131	290	153	na	na	na	na	na	na	na	na	na	na	364	270	97	133	220	163	157	266	207
K106P	na	na	na	na	na	na	na	na	na	na	na	na	na	na	na	na	na	na	na	na	542	548	605	304	377	372	368	398	789	523	na	na	na	na	na	na	na	na	na	na	1730	2115	809	834	1017	979	880	1267	952
K106Q	na	na	na	na	na	na	na	na	na	na	na	na	na	na	na	na	na	na	na	na	63	99	143	43	58	54	83	101	171	72	na	na	na	na	na	na	na	na	na	na	271	206	95	96	139	174	164	251	225
K106R	na	na	na	na	na	na	na	na	na	na	na	na	na	na	na	na	na	na	na	na	346	445	423	209	227	242	240	269	727	467	na	na	na	na	na	na	na	na	na	na	1181	1339	503	557	749	720	687	1004	776
K106S	na	na	na	na	na	na	na	na	na	na	na	na	na	na	na	na	na	na	na	na	97	127	114	95	116	75	77	96	299	259	na	na	na	na	na	na	na	na	na	na	470	690	178	205	213	235	214	315	238
K106T	na	na	na	na	na	na	na	na	na	na	na	na	na	na	na	na	na	na	na	na	342	498	356	226	242	259	307	307	703	463	na	na	na	na	na	na	na	na	na	na	1055	1607	464	537	585	791	650	950	603
K106V	na	na	na	na	na	na	na	na	na	na	na	na	na	na	na	na	na	na	na	na	396	607	645	327	329	417	393	354	1182	667	na	na	na	na	na	na	na	na	na	na	1865	2103	732	863	1063	1234	1050	1515	1284
K106W	na	na	na	na	na	na	na	na	na	na	na	na	na	na	na	na	na	na	na	na	103	111	137	59	81	139	69	87	267	135	na	na	na	na	na	na	na	na	na	na	378	441	148	174	193	198	208	356	243
K106Y	na	na	na	na	na	na	na	na	na	na	na	na	na	na	na	na	na	na	na	na	51	84	49	15	29	33	37	24	75	32	na	na	na	na	na	na	na	na	na	na	88	75	33	63	80	70	84	120	86
K109*	na	na	na	na	na	na	na	na	na	na	na	na	na	na	na	na	na	na	na	na	31	1	na	na	na	3	na	na	na	na	na	na	na	na	na	na	na	na	na	na	26	30	5	na	na	6	na	na	na
K109A	na	na	na	na	na	na	na	na	na	na	na	na	na	na	na	na	na	na	na	na	416	554	512	297	379	453	460	464	1118	689	na	na	na	na	na	na	na	na	na	na	1461	1355	663	847	975	938	967	1854	1133
K109C	na	na	na	na	na	na	na	na	na	na	na	na	na	na	na	na	na	na	na	na	86	116	102	38	61	60	52	76	132	108	na	na	na	na	na	na	na	na	na	na	258	181	108	100	142	167	101	189	187
K109D	na	na	na	na	na	na	na	na	na	na	na	na	na	na	na	na	na	na	na	na	123	59	48	43	17	31	7	11	36	20	na	na	na	na	na	na	na	na	na	na	381	139	92	50	32	46	35	23	23
K109E	na	na	na	na	na	na	na	na	na	na	na	na	na	na	na	na	na	na	na	na	183	241	165	102	84	137	65	53	167	105	na	na	na	na	na	na	na	na	na	na	700	562	240	256	339	248	192	291	227
K109F	na	na	na	na	na	na	na	na	na	na	na	na	na	na	na	na	na	na	na	na	243	264	275	137	202	211	190	258	527	345	na	na	na	na	na	na	na	na	na	na	649	929	306	403	372	391	425	580	480
K109G	na	na	na	na	na	na	na	na	na	na	na	na	na	na	na	na	na	na	na	na	842	1142	1150	597	735	804	793	747	1915	1215	na	na	na	na	na	na	na	na	na	na	3479	4285	1439	1675	1970	2013	1866	2757	2371
K109H	na	na	na	na	na	na	na	na	na	na	na	na	na	na	na	na	na	na	na	na	174	190	194	139	124	146	144	192	477	300	na	na	na	na	na	na	na	na	na	na	487	507	202	294	357	344	387	587	443
K109I	na	na	na	na	na	na	na	na	na	na	na	na	na	na	na	na	na	na	na	na	247	365	298	181	173	178	216	172	529	316	na	na	na	na	na	na	na	na	na	na	831	1036	322	352	515	466	413	565	390
K109L	na	na	na	na	na	na	na	na	na	na	na	na	na	na	na	na	na	na	na	na	313	359	386	222	240	291	279	279	806	517	na	na	na	na	na	na	na	na	na	na	928	868	396	541	562	603	626	950	807
K109M	na	na	na	na	na	na	na	na	na	na	na	na	na	na	na	na	na	na	na	na	269	289	429	204	196	207	179	221	550	306	na	na	na	na	na	na	na	na	na	na	956	1076	396	394	559	565	474	687	406
K109N	na	na	na	na	na	na	na	na	na	na	na	na	na	na	na	na	na	na	na	na	315	483	311	186	262	279	290	308	670	364	na	na	na	na	na	na	na	na	na	na	961	1156	328	407	496	526	515	701	604
K109P	na	na	na	na	na	na	na	na	na	na	na	na	na	na	na	na	na	na	na	na	462	12	23	13	7	9	8	7	6	5	na	na	na	na	na	na	na	na	na	na	709	108	49	39	22	33	32	11	15
K109Q	na	na	na	na	na	na	na	na	na	na	na	na	na	na	na	na	na	na	na	na	24	21	20	30	21	26	11	19	49	56	na	na	na	na	na	na	na	na	na	na	72	132	27	25	40	72	42	43	25
K109R	na	na	na	na	na	na	na	na	na	na	na	na	na	na	na	na	na	na	na	na	425	463	559	267	379	422	379	437	928	650	na	na	na	na	na	na	na	na	na	na	1452	1534	630	744	1066	1034	872	1324	1124
K109S	na	na	na	na	na	na	na	na	na	na	na	na	na	na	na	na	na	na	na	na	548	728	621	397	414	432	453	475	1447	738	na	na	na	na	na	na	na	na	na	na	1721	2074	840	936	1116	1016	995	1477	1199
K109T	na	na	na	na	na	na	na	na	na	na	na	na	na	na	na	na	na	na	na	na	864	1299	981	514	771	636	725	813	1853	1151	na	na	na	na	na	na	na	na	na	na	2503	2370	985	1160	1340	1525	1417	2021	1693
K109V	na	na	na	na	na	na	na	na	na	na	na	na	na	na	na	na	na	na	na	na	582	622	670	390	430	375	386	411	1066	595	na	na	na	na	na	na	na	na	na	na	1781	1839	698	779	1061	1034	976	1208	1006
K109W	na	na	na	na	na	na	na	na	na	na	na	na	na	na	na	na	na	na	na	na	47	90	115	30	44	59	80	51	176	112	na	na	na	na	na	na	na	na	na	na	204	304	82	107	139	160	157	221	189
K109Y	na	na	na	na	na	na	na	na	na	na	na	na	na	na	na	na	na	na	na	na	99	108	98	47	61	67	85	92	208	142	na	na	na	na	na	na	na	na	na	na	237	305	106	180	157	162	160	280	192
K32*	195	47	129	5	15	7	6	15	na	na	184	4	8	16	4	58	na	na	3	8	1	3	7	8	4	9	3	4	7	9	na	na	na	na	na	na	na	na	na	na	na	na	na	na	na	na	na	na	na
K32A	667	1096	279	240	164	124	176	193	69	143	263	595	169	230	200	322	157	150	177	174	599	531	408	234	193	249	294	199	438	314	na	na	na	na	na	na	na	na	na	na	na	na	na	na	na	na	na	na	na
K32C	407	493	138	72	73	29	42	25	45	43	179	330	117	200	77	561	62	46	111	91	340	446	251	122	161	116	98	54	153	115	na	na	na	na	na	na	na	na	na	na	na	na	na	na	na	na	na	na	na
K32D	97	46	3	7	5	4	5	na	na	na	79	1	20	6	1	na	2	2	na	6	94	80	7	2	na	2	na	na	na	na	na	na	na	na	na	na	na	na	na	na	na	na	na	na	na	na	na	na	na
K32E	932	1209	295	187	305	193	107	258	86	127	556	3	245	348	294	336	195	333	235	203	4	3	584	271	324	310	174	199	401	288	na	na	na	na	na	na	na	na	na	na	na	na	na	na	na	na	na	na	na
K32F	679	1046	261	102	97	173	132	157	49	94	261	557	166	79	136	70	131	97	107	136	567	774	367	179	191	248	147	114	406	239	na	na	na	na	na	na	na	na	na	na	na	na	na	na	na	na	na	na	na
K32G	3404	4548	1300	733	815	465	595	1303	354	549	1507	2947	1122	742	585	1487	861	1200	798	736	1	2	1901	984	1063	1169	856	754	1845	1161	na	na	na	na	na	na	na	na	na	na	na	na	na	na	na	na	na	na	na
K32H	172	228	71	29	151	43	34	3	14	29	115	344	79	71	61	55	44	28	37	36	163	135	68	45	50	49	39	39	79	91	na	na	na	na	na	na	na	na	na	na	na	na	na	na	na	na	na	na	na
K32I	238	226	104	24	34	11	19	47	17	8	94	4	41	42	31	28	17	64	30	14	1	144	117	64	26	51	28	15	36	26	na	na	na	na	na	na	na	na	na	na	na	na	na	na	na	na	na	na	na
K32L	2279	2798	916	505	835	715	635	1412	634	952	1090	2	434	666	563	749	689	741	961	1033	2088	2	1632	830	916	1018	879	789	2213	1657	na	na	na	na	na	na	na	na	na	na	na	na	na	na	na	na	na	na	na
K32M	1078	1170	389	190	186	195	114	320	101	109	393	829	211	280	139	278	150	136	195	141	1	3	528	325	275	275	221	157	290	242	na	na	na	na	na	na	na	na	na	na	na	na	na	na	na	na	na	na	na
K32N	61	114	2	na	na	7	4	na	na	na	3	3	na	5	5	na	na	na	na	na	1	7	3	na	2	2	2	2	na	7	na	na	na	na	na	na	na	na	na	na	na	na	na	na	na	na	na	na	na
K32P	155	101	39	12	22	na	2	9	na	4	195	76	23	11	8	na	9	4	7	na	172	115	51	15	6	5	na	na	na	na	na	na	na	na	na	na	na	na	na	na	na	na	na	na	na	na	na	na	na
K32Q	714	816	310	136	167	57	117	252	133	98	378	528	221	203	120	55	176	159	186	223	590	2	412	178	206	252	148	137	277	274	na	na	na	na	na	na	na	na	na	na	na	na	na	na	na	na	na	na	na
K32R	4245	5836	1789	1159	1398	864	683	1540	648	1054	2045	3	1033	1171	980	1519	1158	697	1232	1412	7	5	2725	1548	1393	1669	1211	1152	2391	1867	na	na	na	na	na	na	na	na	na	na	na	na	na	na	na	na	na	na	na
K32S	948	1321	410	185	206	183	172	224	230	287	461	734	265	343	180	254	225	252	293	251	772	893	560	317	288	331	281	198	658	505	na	na	na	na	na	na	na	na	na	na	na	na	na	na	na	na	na	na	na
K32T	630	748	266	161	141	95	111	164	69	102	354	559	170	447	119	178	100	203	107	52	548	611	248	216	142	212	136	75	291	218	na	na	na	na	na	na	na	na	na	na	na	na	na	na	na	na	na	na	na
K32V	1388	2123	587	355	245	442	316	583	223	499	614	1079	291	376	489	637	734	468	457	350	1262	2	863	510	589	609	554	401	1130	792	na	na	na	na	na	na	na	na	na	na	na	na	na	na	na	na	na	na	na
K32W	1391	1799	619	243	291	124	111	109	101	101	581	1	240	405	205	276	113	191	167	168	1	1402	762	376	279	396	172	180	298	268	na	na	na	na	na	na	na	na	na	na	na	na	na	na	na	na	na	na	na
K32Y	237	399	175	58	54	94	32	121	43	75	94	268	77	63	55	47	57	23	89	74	220	891	154	78	188	115	92	144	162	125	na	na	na	na	na	na	na	na	na	na	na	na	na	na	na	na	na	na	na
K38*	94	22	19	5	4	na	na	16	na	na	41	20	4	5	2	na	na	na	na	na	1	2	11	7	3	3	na	na	6	3	na	na	na	na	na	na	na	na	na	na	na	na	na	na	na	na	na	na	na
K38A	831	1715	512	635	505	291	352	742	375	477	413	838	603	815	331	1121	528	380	487	455	750	1233	670	367	414	509	505	575	1158	787	na	na	na	na	na	na	na	na	na	na	na	na	na	na	na	na	na	na	na
K38C	392	647	212	134	136	173	610	252	261	306	116	484	100	106	174	194	289	243	286	345	358	494	311	170	191	222	296	372	698	419	na	na	na	na	na	na	na	na	na	na	na	na	na	na	na	na	na	na	na
K38D	500	594	261	141	125	149	137	310	130	305	193	447	115	139	127	117	173	147	207	194	376	432	309	147	126	191	221	215	414	334	na	na	na	na	na	na	na	na	na	na	na	na	na	na	na	na	na	na	na
K38E	352	388	145	114	100	171	116	163	110	209	144	3	118	71	100	235	105	99	116	170	1	2	264	123	102	158	144	110	332	220	na	na	na	na	na	na	na	na	na	na	na	na	na	na	na	na	na	na	na
K38F	1055	1542	497	323	488	334	494	1234	604	747	348	979	296	606	374	803	437	628	630	901	5	1	844	437	585	619	649	761	1877	1283	na	na	na	na	na	na	na	na	na	na	na	na	na	na	na	na	na	na	na
K38G	1133	1577	648	468	519	517	1444	1036	508	830	502	1103	450	295	477	558	897	474	904	1303	1133	1	1161	647	638	788	794	865	1739	1243	na	na	na	na	na	na	na	na	na	na	na	na	na	na	na	na	na	na	na
K38H	897	1140	491	344	279	291	257	598	227	471	391	1	264	213	249	367	453	256	362	405	8	1226	725	393	457	488	428	419	959	695	na	na	na	na	na	na	na	na	na	na	na	na	na	na	na	na	na	na	na
K38I	600	785	263	316	376	176	208	404	261	437	160	503	194	169	198	154	228	178	355	542	1	821	473	246	305	314	311	363	784	620	na	na	na	na	na	na	na	na	na	na	na	na	na	na	na	na	na	na	na
K38L	2051	2486	1174	772	853	1184	1073	1480	992	1582	1148	2113	618	616	727	1931	989	1232	1125	1185	1913	1	1530	883	995	1262	1234	1378	3281	2020	na	na	na	na	na	na	na	na	na	na	na	na	na	na	na	na	na	na	na
K38M	358	420	185	134	77	178	72	113	145	194	182	311	121	98	120	64	127	475	153	158	327	297	291	123	106	135	179	163	366	221	na	na	na	na	na	na	na	na	na	na	na	na	na	na	na	na	na	na	na
K38N	769	1334	218	227	280	288	278	626	628	631	277	3	112	108	186	181	276	888	431	644	3	1	437	224	290	315	492	440	1480	920	na	na	na	na	na	na	na	na	na	na	na	na	na	na	na	na	na	na	na
K38P	1724	815	321	103	115	36	38	72	54	50	1232	665	423	179	120	98	44	79	57	88	9	633	346	174	224	109	47	56	67	66	na	na	na	na	na	na	na	na	na	na	na	na	na	na	na	na	na	na	na
K38Q	261	314	179	61	30	13	40	14	41	50	173	223	58	71	54	28	56	498	69	180	279	346	212	69	77	91	46	67	95	65	na	na	na	na	na	na	na	na	na	na	na	na	na	na	na	na	na	na	na
K38R	769	998	386	304	341	342	302	689	318	525	210	2	288	288	384	294	435	288	448	611	3	4	625	354	417	428	551	598	1273	779	na	na	na	na	na	na	na	na	na	na	na	na	na	na	na	na	na	na	na
K38S	1625	2811	858	717	732	738	840	1503	882	1547	849	1	475	822	523	781	911	801	1192	1640	4	2759	1636	848	836	1196	1117	1177	3024	2021	na	na	na	na	na	na	na	na	na	na	na	na	na	na	na	na	na	na	na
K38T	1180	1812	644	411	546	573	557	927	649	1111	625	1292	404	642	411	964	512	530	780	1007	1111	2223	862	501	724	707	825	780	2168	1343	na	na	na	na	na	na	na	na	na	na	na	na	na	na	na	na	na	na	na
K38V	1082	1618	649	394	330	343	442	621	485	785	647	1349	331	279	296	453	362	355	553	550	1137	1725	1361	525	482	658	610	537	1426	965	na	na	na	na	na	na	na	na	na	na	na	na	na	na	na	na	na	na	na
K38W	368	427	137	142	72	119	88	194	89	155	152	286	101	102	97	86	116	88	190	137	326	1	399	172	135	207	180	146	403	274	na	na	na	na	na	na	na	na	na	na	na	na	na	na	na	na	na	na	na
K38Y	526	863	179	144	174	238	216	385	183	481	210	534	194	198	142	246	159	182	276	352	498	1	537	199	249	291	248	329	747	536	na	na	na	na	na	na	na	na	na	na	na	na	na	na	na	na	na	na	na
K58*	138	16	14	10	8	na	na	9	2	na	2	20	21	4	7	3	4	4	2	12	na	na	na	na	na	na	na	na	na	na	132	72	13	9	5	6	8	3	4	2	na	na	na	na	na	na	na	na	na
K58A	598	829	383	233	210	282	279	442	281	448	292	423	158	229	228	630	427	624	298	292	na	na	na	na	na	na	na	na	na	na	591	931	186	196	192	150	232	208	245	194	na	na	na	na	na	na	na	na	na
K58C	633	745	418	241	367	4100	265	405	146	410	347	446	163	168	185	282	253	260	324	430	na	na	na	na	na	na	na	na	na	na	621	902	212	224	162	153	233	203	248	228	na	na	na	na	na	na	na	na	na
K58D	335	709	275	166	219	111	192	409	194	335	277	326	140	183	133	198	158	242	245	315	na	na	na	na	na	na	na	na	na	na	442	477	95	122	112	112	149	161	155	148	na	na	na	na	na	na	na	na	na
K58E	4	6	376	279	282	507	228	459	241	356	5	428	294	919	227	414	329	380	302	300	na	na	na	na	na	na	na	na	na	na	548	832	167	203	192	152	207	208	232	215	na	na	na	na	na	na	na	na	na
K58F	776	1365	834	480	593	359	424	733	383	594	618	779	261	338	395	544	402	304	442	641	na	na	na	na	na	na	na	na	na	na	1129	1451	277	390	266	226	432	385	406	372	na	na	na	na	na	na	na	na	na
K58G	2880	8	1752	1102	1219	1327	1072	1634	849	1509	2	1802	861	948	955	1865	1221	1144	1432	1360	na	na	na	na	na	na	na	na	na	na	2764	3797	835	946	782	730	910	1025	969	967	na	na	na	na	na	na	na	na	na
K58H	354	476	183	194	172	198	103	275	130	212	190	194	94	168	110	190	120	85	139	203	na	na	na	na	na	na	na	na	na	na	269	295	102	83	84	46	115	91	83	103	na	na	na	na	na	na	na	na	na
K58I	306	290	122	93	124	120	148	267	68	184	17	177	165	56	90	67	113	116	207	164	na	na	na	na	na	na	na	na	na	na	293	333	97	112	82	71	81	80	142	83	na	na	na	na	na	na	na	na	na
K58L	2702	3242	1389	1074	1339	1011	1090	1834	1115	2069	1601	1719	907	961	874	1306	1157	1245	1268	1231	na	na	na	na	na	na	na	na	na	na	2672	3430	1131	886	845	605	810	922	1001	999	na	na	na	na	na	na	na	na	na
K58M	493	825	394	217	484	233	283	780	275	406	388	398	239	177	267	523	252	232	322	932	na	na	na	na	na	na	na	na	na	na	584	919	197	242	189	168	195	218	277	225	na	na	na	na	na	na	na	na	na
K58N	211	241	98	94	75	42	43	112	59	162	3	160	108	26	67	39	103	151	47	59	na	na	na	na	na	na	na	na	na	na	154	220	30	37	33	43	68	51	58	79	na	na	na	na	na	na	na	na	na
K58P	908	1096	600	373	578	351	261	547	282	412	554	529	178	452	272	330	284	224	439	447	na	na	na	na	na	na	na	na	na	na	554	632	119	195	145	115	178	202	202	231	na	na	na	na	na	na	na	na	na
K58Q	590	944	333	215	289	190	237	541	270	446	375	423	173	92	171	184	271	279	273	489	na	na	na	na	na	na	na	na	na	na	520	791	133	181	149	150	210	206	229	224	na	na	na	na	na	na	na	na	na
K58R	5	6	1373	893	1293	1020	928	1611	937	1287	2	1548	786	497	839	1401	1074	784	1045	1245	na	na	na	na	na	na	na	na	na	na	2176	3030	559	762	674	566	735	867	841	831	na	na	na	na	na	na	na	na	na
K58S	1304	1557	795	550	550	495	500	891	469	746	875	847	392	352	496	790	552	701	714	733	na	na	na	na	na	na	na	na	na	na	1231	1605	342	416	340	328	369	417	477	452	na	na	na	na	na	na	na	na	na
K58T	477	629	278	161	221	229	171	190	111	221	270	388	153	145	228	362	180	189	287	251	na	na	na	na	na	na	na	na	na	na	484	570	118	146	111	94	101	124	140	105	na	na	na	na	na	na	na	na	na
K58V	1505	2157	777	563	739	621	672	1197	773	967	813	1077	531	516	623	606	852	839	787	1209	na	na	na	na	na	na	na	na	na	na	1707	2178	421	607	515	448	664	645	727	698	na	na	na	na	na	na	na	na	na
K58W	2	1842	749	521	662	609	470	1152	337	794	903	1032	369	422	481	888	515	551	704	699	na	na	na	na	na	na	na	na	na	na	1384	2127	515	559	443	380	516	569	569	534	na	na	na	na	na	na	na	na	na
K58Y	466	586	340	205	249	208	191	389	182	203	275	370	186	134	194	255	176	150	239	411	na	na	na	na	na	na	na	na	na	na	489	630	125	166	136	106	187	162	159	131	na	na	na	na	na	na	na	na	na
K76*	2	na	na	na	na	na	1	na	na	na	2	3	na	2	1	na	na	na	na	na	na	na	na	na	na	na	na	na	na	na	30	2	2	na	3	2	na	3	na	na	na	na	na	na	na	na	na	na	na
K76A	1059	1347	789	453	486	285	439	622	411	698	669	772	254	459	312	1163	412	349	540	449	na	na	na	na	na	na	na	na	na	na	1031	1300	305	367	313	283	460	432	443	419	na	na	na	na	na	na	na	na	na
K76C	197	346	169	66	92	91	96	182	81	132	78	164	85	120	93	671	129	84	133	123	na	na	na	na	na	na	na	na	na	na	258	313	87	109	71	80	114	112	124	96	na	na	na	na	na	na	na	na	na
K76D	409	459	208	113	167	179	241	403	184	262	213	263	79	61	93	137	212	154	184	340	na	na	na	na	na	na	na	na	na	na	356	411	96	121	82	65	122	108	149	110	na	na	na	na	na	na	na	na	na
K76E	2	2	223	140	368	266	207	430	213	309	1	401	58	160	102	184	206	229	244	375	na	na	na	na	na	na	na	na	na	na	496	596	86	149	125	123	183	232	237	265	na	na	na	na	na	na	na	na	na
K76F	266	399	226	125	121	219	121	248	99	180	88	203	103	81	130	151	232	115	183	275	na	na	na	na	na	na	na	na	na	na	222	309	75	80	92	78	141	116	156	160	na	na	na	na	na	na	na	na	na
K76G	2232	2	1238	831	1241	1135	814	1417	691	1221	1307	1569	1156	978	750	1336	929	1149	1161	995	na	na	na	na	na	na	na	na	na	na	2239	2902	598	778	701	538	852	787	869	904	na	na	na	na	na	na	na	na	na
K76H	2	422	224	108	88	60	99	698	71	137	135	167	125	63	126	111	215	50	112	104	na	na	na	na	na	na	na	na	na	na	253	327	52	71	53	61	69	49	57	56	na	na	na	na	na	na	na	na	na
K76I	4	445	194	147	138	161	169	201	509	334	118	246	161	91	141	342	123	133	234	304	na	na	na	na	na	na	na	na	na	na	139	215	32	52	49	48	47	64	67	97	na	na	na	na	na	na	na	na	na
K76L	1022	1640	748	469	450	440	375	920	410	690	730	623	207	225	341	437	386	867	587	725	na	na	na	na	na	na	na	na	na	na	865	1275	348	391	323	252	410	407	478	564	na	na	na	na	na	na	na	na	na
K76M	370	511	220	196	102	123	143	172	134	230	1	282	102	151	108	181	246	122	208	282	na	na	na	na	na	na	na	na	na	na	334	430	86	125	128	76	163	123	128	141	na	na	na	na	na	na	na	na	na
K76N	727	802	361	280	300	219	238	230	256	333	1	433	190	343	228	203	405	241	377	498	na	na	na	na	na	na	na	na	na	na	496	599	143	150	124	120	125	210	170	128	na	na	na	na	na	na	na	na	na
K76P	882	1401	469	368	489	486	347	588	301	500	616	539	440	877	310	413	476	267	400	335	na	na	na	na	na	na	na	na	na	na	730	954	355	293	280	250	304	360	364	345	na	na	na	na	na	na	na	na	na
K76Q	510	436	161	95	125	98	135	156	168	201	243	242	101	122	93	205	135	82	150	106	na	na	na	na	na	na	na	na	na	na	318	342	78	98	132	85	105	128	90	123	na	na	na	na	na	na	na	na	na
K76R	8	3	675	449	494	685	410	645	498	741	4	817	262	274	394	1055	516	395	565	794	na	na	na	na	na	na	na	na	na	na	1237	1623	416	374	357	341	430	449	520	407	na	na	na	na	na	na	na	na	na
K76S	1062	1360	691	433	461	342	438	514	316	399	1	711	271	279	321	515	362	379	451	482	na	na	na	na	na	na	na	na	na	na	898	1242	313	317	269	249	317	371	358	310	na	na	na	na	na	na	na	na	na
K76T	1084	1189	574	357	430	1027	365	665	429	573	5	657	184	141	332	422	533	800	492	499	na	na	na	na	na	na	na	na	na	na	727	929	212	253	222	203	267	258	266	274	na	na	na	na	na	na	na	na	na
K76V	1090	2	777	690	594	798	626	835	571	1002	531	862	290	386	451	667	744	459	750	898	na	na	na	na	na	na	na	na	na	na	1064	1496	324	459	417	355	523	598	631	692	na	na	na	na	na	na	na	na	na
K76W	434	938	364	200	175	282	200	757	264	329	247	331	182	155	145	241	222	294	275	479	na	na	na	na	na	na	na	na	na	na	426	530	145	162	163	117	149	217	203	180	na	na	na	na	na	na	na	na	na
K76Y	3	433	168	159	128	114	178	339	157	199	245	227	63	74	124	73	134	85	157	174	na	na	na	na	na	na	na	na	na	na	291	355	96	106	103	87	134	159	118	146	na	na	na	na	na	na	na	na	na
L104*	na	na	na	na	na	na	na	na	na	na	na	na	na	na	na	na	na	na	na	na	1	4	na	na	2	2	na	na	na	na	na	na	na	na	na	na	na	na	na	na	na	na	na	na	na	na	na	na	na
L104A	na	na	na	na	na	na	na	na	na	na	na	na	na	na	na	na	na	na	na	na	13	28	14	5	12	6	17	6	15	11	na	na	na	na	na	na	na	na	na	na	50	20	18	19	21	14	11	20	na
L104C	na	na	na	na	na	na	na	na	na	na	na	na	na	na	na	na	na	na	na	na	23	10	4	2	4	3	7	2	17	3	na	na	na	na	na	na	na	na	na	na	28	na	6	12	24	8	10	10	na
L104D	na	na	na	na	na	na	na	na	na	na	na	na	na	na	na	na	na	na	na	na	9	7	3	na	na	na	na	2	na	na	na	na	na	na	na	na	na	na	na	na	22	na	na	na	na	na	na	na	na
L104E	na	na	na	na	na	na	na	na	na	na	na	na	na	na	na	na	na	na	na	na	28	24	26	9	9	20	9	3	7	15	na	na	na	na	na	na	na	na	na	na	62	72	14	15	23	21	9	10	18
L104F	na	na	na	na	na	na	na	na	na	na	na	na	na	na	na	na	na	na	na	na	51	11	3	4	18	17	2	13	4	9	na	na	na	na	na	na	na	na	na	na	38	130	10	9	9	na	6	na	5
L104G	na	na	na	na	na	na	na	na	na	na	na	na	na	na	na	na	na	na	na	na	106	80	48	22	40	37	43	23	48	38	na	na	na	na	na	na	na	na	na	na	245	131	72	69	84	132	62	60	47
L104H	na	na	na	na	na	na	na	na	na	na	na	na	na	na	na	na	na	na	na	na	16	4	3	3	na	4	2	4	7	5	na	na	na	na	na	na	na	na	na	na	11	na	7	na	4	8	na	na	na
L104I	na	na	na	na	na	na	na	na	na	na	na	na	na	na	na	na	na	na	na	na	28	21	9	12	14	20	4	3	13	12	na	na	na	na	na	na	na	na	na	na	31	56	16	14	9	25	11	10	na
L104K	na	na	na	na	na	na	na	na	na	na	na	na	na	na	na	na	na	na	na	na	18	13	10	6	7	7	8	4	16	7	na	na	na	na	na	na	na	na	na	na	30	56	25	13	27	8	10	7	8
L104M	na	na	na	na	na	na	na	na	na	na	na	na	na	na	na	na	na	na	na	na	1	4	na	na	na	na	na	2	na	na	na	na	na	na	na	na	na	na	na	na	na	na	na	na	na	na	na	na	na
L104N	na	na	na	na	na	na	na	na	na	na	na	na	na	na	na	na	na	na	na	na	21	7	3	na	na	2	na	na	na	na	na	na	na	na	na	na	na	na	na	na	25	11	8	3	4	na	na	5	na
L104P	na	na	na	na	na	na	na	na	na	na	na	na	na	na	na	na	na	na	na	na	48	na	na	na	na	na	na	na	na	na	na	na	na	na	na	na	na	na	na	na	20	na	na	na	na	na	na	na	na
L104Q	na	na	na	na	na	na	na	na	na	na	na	na	na	na	na	na	na	na	na	na	20	13	9	4	8	9	7	17	13	5	na	na	na	na	na	na	na	na	na	na	43	12	9	10	14	30	11	17	11
L104R	na	na	na	na	na	na	na	na	na	na	na	na	na	na	na	na	na	na	na	na	172	52	75	20	59	34	28	13	57	36	na	na	na	na	na	na	na	na	na	na	174	59	88	85	70	48	47	67	30
L104S	na	na	na	na	na	na	na	na	na	na	na	na	na	na	na	na	na	na	na	na	16	20	8	10	6	11	4	10	14	6	na	na	na	na	na	na	na	na	na	na	51	35	34	14	7	16	12	22	8
L104T	na	na	na	na	na	na	na	na	na	na	na	na	na	na	na	na	na	na	na	na	26	21	13	7	5	8	7	2	17	14	na	na	na	na	na	na	na	na	na	na	40	na	15	17	9	23	14	16	10
L104V	na	na	na	na	na	na	na	na	na	na	na	na	na	na	na	na	na	na	na	na	65	38	35	14	23	24	11	2	35	5	na	na	na	na	na	na	na	na	na	na	116	129	41	26	61	29	28	10	33
L104W	na	na	na	na	na	na	na	na	na	na	na	na	na	na	na	na	na	na	na	na	22	9	na	6	2	2	na	na	na	na	na	na	na	na	na	na	na	na	na	na	43	71	9	na	na	na	na	na	na
L104Y	na	na	na	na	na	na	na	na	na	na	na	na	na	na	na	na	na	na	na	na	5	11	9	12	6	5	na	2	na	na	na	na	na	na	na	na	na	na	na	na	46	13	6	8	6	5	9	na	5
L110*	na	na	na	na	na	na	na	na	na	na	na	na	na	na	na	na	na	na	na	na	45	1	na	na	na	na	na	na	na	na	na	na	na	na	na	na	na	na	na	na	58	14	6	26	na	na	na	na	na
L110A	na	na	na	na	na	na	na	na	na	na	na	na	na	na	na	na	na	na	na	na	329	339	341	157	172	218	158	113	287	211	na	na	na	na	na	na	na	na	na	na	1019	846	326	305	378	371	241	282	194
L110C	na	na	na	na	na	na	na	na	na	na	na	na	na	na	na	na	na	na	na	na	25	24	25	13	14	11	3	13	113	20	na	na	na	na	na	na	na	na	na	na	99	55	19	21	22	32	27	39	17
L110D	na	na	na	na	na	na	na	na	na	na	na	na	na	na	na	na	na	na	na	na	112	4	na	na	na	4	na	3	na	na	na	na	na	na	na	na	na	na	na	na	104	18	9	na	na	na	na	na	na
L110E	na	na	na	na	na	na	na	na	na	na	na	na	na	na	na	na	na	na	na	na	387	40	13	8	6	7	6	3	8	11	na	na	na	na	na	na	na	na	na	na	647	107	89	28	23	27	34	72	166
L110F	na	na	na	na	na	na	na	na	na	na	na	na	na	na	na	na	na	na	na	na	61	70	94	45	92	56	83	29	153	89	na	na	na	na	na	na	na	na	na	na	223	5064	96	105	129	123	116	124	104
L110G	na	na	na	na	na	na	na	na	na	na	na	na	na	na	na	na	na	na	na	na	669	196	78	43	37	37	24	33	21	4	na	na	na	na	na	na	na	na	na	na	1592	1149	176	63	51	56	25	24	33
L110H	na	na	na	na	na	na	na	na	na	na	na	na	na	na	na	na	na	na	na	na	61	19	18	7	2	20	na	na	16	na	na	na	na	na	na	na	na	na	na	na	199	65	30	8	18	11	5	na	na
L110I	na	na	na	na	na	na	na	na	na	na	na	na	na	na	na	na	na	na	na	na	122	160	141	81	108	99	124	108	258	183	na	na	na	na	na	na	na	na	na	na	359	330	184	183	253	237	189	259	285
L110K	na	na	na	na	na	na	na	na	na	na	na	na	na	na	na	na	na	na	na	na	326	151	154	55	19	35	25	21	42	25	na	na	na	na	na	na	na	na	na	na	774	482	123	83	87	81	42	84	45
L110M	na	na	na	na	na	na	na	na	na	na	na	na	na	na	na	na	na	na	na	na	172	159	169	78	112	144	103	86	225	147	na	na	na	na	na	na	na	na	na	na	633	583	160	177	225	228	180	245	218
L110N	na	na	na	na	na	na	na	na	na	na	na	na	na	na	na	na	na	na	na	na	131	178	44	24	6	24	5	5	10	7	na	na	na	na	na	na	na	na	na	na	397	164	51	43	38	44	21	24	17
L110P	na	na	na	na	na	na	na	na	na	na	na	na	na	na	na	na	na	na	na	na	132	5	4	3	5	2	2	na	na	8	na	na	na	na	na	na	na	na	na	na	126	38	21	15	15	7	5	7	na
L110Q	na	na	na	na	na	na	na	na	na	na	na	na	na	na	na	na	na	na	na	na	46	34	24	na	11	na	33	20	16	na	na	na	na	na	na	na	na	na	na	na	62	56	24	na	17	23	4	9	na
L110R	na	na	na	na	na	na	na	na	na	na	na	na	na	na	na	na	na	na	na	na	183	7	8	2	4	2	na	na	na	na	na	na	na	na	na	na	na	na	na	na	275	81	12	6	7	5	6	na	na
L110S	na	na	na	na	na	na	na	na	na	na	na	na	na	na	na	na	na	na	na	na	284	141	109	60	61	60	36	27	89	40	na	na	na	na	na	na	na	na	na	na	516	437	125	113	98	99	59	85	104
L110T	na	na	na	na	na	na	na	na	na	na	na	na	na	na	na	na	na	na	na	na	384	353	325	179	141	184	143	156	263	228	na	na	na	na	na	na	na	na	na	na	1084	929	332	408	374	322	307	375	295
L110V	na	na	na	na	na	na	na	na	na	na	na	na	na	na	na	na	na	na	na	na	641	558	556	259	293	299	326	246	575	414	na	na	na	na	na	na	na	na	na	na	1875	1757	675	719	846	765	679	817	657
L110W	na	na	na	na	na	na	na	na	na	na	na	na	na	na	na	na	na	na	na	na	47	22	10	6	na	2	na	na	4	9	na	na	na	na	na	na	na	na	na	na	140	47	16	9	13	7	6	na	na
L110Y	na	na	na	na	na	na	na	na	na	na	na	na	na	na	na	na	na	na	na	na	43	16	11	5	7	11	2	4	4	na	na	na	na	na	na	na	na	na	na	na	115	52	26	17	8	11	7	14	18
L112*	na	na	na	na	na	na	na	na	na	na	na	na	na	na	na	na	na	na	na	na	175	92	7	6	2	2	6	2	5	4	na	na	na	na	na	na	na	na	na	na	224	62	12	15	9	7	14	15	14
L112A	na	na	na	na	na	na	na	na	na	na	na	na	na	na	na	na	na	na	na	na	494	715	504	277	272	414	269	333	678	482	na	na	na	na	na	na	na	na	na	na	1724	1896	768	711	812	647	602	694	677
L112C	na	na	na	na	na	na	na	na	na	na	na	na	na	na	na	na	na	na	na	na	222	293	269	228	207	231	200	242	510	440	na	na	na	na	na	na	na	na	na	na	650	1217	377	427	472	679	466	711	594
L112D	na	na	na	na	na	na	na	na	na	na	na	na	na	na	na	na	na	na	na	na	133	14	12	2	2	3	6	na	na	na	na	na	na	na	na	na	na	na	na	na	163	20	16	15	12	8	8	8	28
L112E	na	na	na	na	na	na	na	na	na	na	na	na	na	na	na	na	na	na	na	na	572	176	145	22	15	12	15	2	19	15	na	na	na	na	na	na	na	na	na	na	1394	307	129	104	50	56	17	23	15
L112F	na	na	na	na	na	na	na	na	na	na	na	na	na	na	na	na	na	na	na	na	1097	1469	1560	823	957	1074	971	996	3083	2027	na	na	na	na	na	na	na	na	na	na	3110	3334	1460	1812	2215	2194	2244	3326	2549
L112G	na	na	na	na	na	na	na	na	na	na	na	na	na	na	na	na	na	na	na	na	2230	256	168	70	42	68	38	40	31	21	na	na	na	na	na	na	na	na	na	na	4481	1013	451	231	262	145	122	147	354
L112H	na	na	na	na	na	na	na	na	na	na	na	na	na	na	na	na	na	na	na	na	485	503	479	294	255	363	319	359	855	592	na	na	na	na	na	na	na	na	na	na	1388	1746	551	625	667	685	592	964	778
L112I	na	na	na	na	na	na	na	na	na	na	na	na	na	na	na	na	na	na	na	na	601	446	406	186	324	329	264	241	729	417	na	na	na	na	na	na	na	na	na	na	923	1378	471	560	710	772	638	918	723
L112K	na	na	na	na	na	na	na	na	na	na	na	na	na	na	na	na	na	na	na	na	491	394	359	197	163	204	133	155	336	553	na	na	na	na	na	na	na	na	na	na	1459	1469	510	439	428	407	229	399	393
L112M	na	na	na	na	na	na	na	na	na	na	na	na	na	na	na	na	na	na	na	na	380	396	396	229	266	273	324	257	699	518	na	na	na	na	na	na	na	na	na	na	1191	1717	485	589	749	731	663	885	724
L112N	na	na	na	na	na	na	na	na	na	na	na	na	na	na	na	na	na	na	na	na	585	294	265	139	137	157	75	48	80	167	na	na	na	na	na	na	na	na	na	na	1418	756	337	257	182	198	132	154	114
L112P	na	na	na	na	na	na	na	na	na	na	na	na	na	na	na	na	na	na	na	na	1629	111	74	37	21	58	19	17	27	29	na	na	na	na	na	na	na	na	na	na	2338	432	174	136	87	94	75	139	166
L112Q	na	na	na	na	na	na	na	na	na	na	na	na	na	na	na	na	na	na	na	na	311	337	109	113	149	102	87	84	197	122	na	na	na	na	na	na	na	na	na	na	738	967	167	237	198	191	144	228	186
L112R	na	na	na	na	na	na	na	na	na	na	na	na	na	na	na	na	na	na	na	na	1277	476	316	199	138	163	70	72	164	95	na	na	na	na	na	na	na	na	na	na	3431	3351	577	319	352	396	208	283	459
L112S	na	na	na	na	na	na	na	na	na	na	na	na	na	na	na	na	na	na	na	na	793	232	223	88	67	59	77	25	26	19	na	na	na	na	na	na	na	na	na	na	2281	3284	305	160	109	122	98	141	236
L112T	na	na	na	na	na	na	na	na	na	na	na	na	na	na	na	na	na	na	na	na	783	1011	798	449	531	554	472	433	1259	817	na	na	na	na	na	na	na	na	na	na	2245	1891	947	952	1198	1155	888	1268	1047
L112V	na	na	na	na	na	na	na	na	na	na	na	na	na	na	na	na	na	na	na	na	1239	1748	1844	877	1094	1273	1191	1191	2931	1886	na	na	na	na	na	na	na	na	na	na	4204	5438	2078	2366	2879	2817	2562	3583	2881
L112W	na	na	na	na	na	na	na	na	na	na	na	na	na	na	na	na	na	na	na	na	755	622	801	341	407	554	379	385	1179	671	na	na	na	na	na	na	na	na	na	na	2184	3340	907	934	1128	996	869	1327	1036
L112Y	na	na	na	na	na	na	na	na	na	na	na	na	na	na	na	na	na	na	na	na	222	547	403	214	138	221	152	204	491	327	na	na	na	na	na	na	na	na	na	na	899	920	384	409	504	438	367	779	478
L156*	na	na	na	na	na	na	na	na	na	na	na	na	na	na	na	na	na	na	na	na	na	na	na	na	na	na	na	na	na	na	85	28	6	na	1	1	3	2	7	3	81	34	6	9	9	10	na	9	13
L156A	na	na	na	na	na	na	na	na	na	na	na	na	na	na	na	na	na	na	na	na	na	na	na	na	na	na	na	na	na	na	182	369	113	117	109	87	140	236	173	177	475	555	233	305	345	347	311	603	412
L156C	na	na	na	na	na	na	na	na	na	na	na	na	na	na	na	na	na	na	na	na	na	na	na	na	na	na	na	na	na	na	134	111	31	20	17	26	38	25	29	37	265	201	74	88	97	62	83	63	43
L156D	na	na	na	na	na	na	na	na	na	na	na	na	na	na	na	na	na	na	na	na	na	na	na	na	na	na	na	na	na	na	145	156	23	34	30	26	30	27	39	33	372	286	98	62	65	62	34	38	44
L156E	na	na	na	na	na	na	na	na	na	na	na	na	na	na	na	na	na	na	na	na	na	na	na	na	na	na	na	na	na	na	317	270	89	103	66	81	98	104	118	99	768	605	250	274	273	271	223	225	184
L156F	na	na	na	na	na	na	na	na	na	na	na	na	na	na	na	na	na	na	na	na	na	na	na	na	na	na	na	na	na	na	354	773	214	301	316	286	526	659	653	850	10	10	579	883	1020	1076	1266	1747	1646
L156G	na	na	na	na	na	na	na	na	na	na	na	na	na	na	na	na	na	na	na	na	na	na	na	na	na	na	na	na	na	na	807	887	251	266	228	175	258	365	282	327	2071	8	564	637	683	595	493	690	724
L156H	na	na	na	na	na	na	na	na	na	na	na	na	na	na	na	na	na	na	na	na	na	na	na	na	na	na	na	na	na	na	239	393	165	169	169	130	219	269	314	314	554	764	365	506	485	555	568	666	690
L156I	na	na	na	na	na	na	na	na	na	na	na	na	na	na	na	na	na	na	na	na	na	na	na	na	na	na	na	na	na	na	194	185	85	74	64	53	83	84	88	100	407	433	146	211	180	446	201	249	189
L156K	na	na	na	na	na	na	na	na	na	na	na	na	na	na	na	na	na	na	na	na	na	na	na	na	na	na	na	na	na	na	535	1059	399	435	473	399	688	863	897	1166	1381	2113	870	1300	1545	1754	1747	2339	2431
L156M	na	na	na	na	na	na	na	na	na	na	na	na	na	na	na	na	na	na	na	na	na	na	na	na	na	na	na	na	na	na	190	275	120	130	125	114	199	210	273	406	477	760	272	357	475	473	482	799	732
L156N	na	na	na	na	na	na	na	na	na	na	na	na	na	na	na	na	na	na	na	na	na	na	na	na	na	na	na	na	na	na	320	330	101	149	112	91	107	143	134	139	805	744	257	284	317	367	309	351	284
L156P	na	na	na	na	na	na	na	na	na	na	na	na	na	na	na	na	na	na	na	na	na	na	na	na	na	na	na	na	na	na	290	38	17	19	10	14	6	10	7	2	3	105	25	29	13	22	20	7	10
L156Q	na	na	na	na	na	na	na	na	na	na	na	na	na	na	na	na	na	na	na	na	na	na	na	na	na	na	na	na	na	na	129	170	60	44	61	66	136	161	132	217	225	3	185	272	240	249	271	257	353
L156R	na	na	na	na	na	na	na	na	na	na	na	na	na	na	na	na	na	na	na	na	na	na	na	na	na	na	na	na	na	na	617	1072	452	551	515	443	836	950	1134	1407	1544	2408	1056	1499	1847	1997	1932	3202	2613
L156S	na	na	na	na	na	na	na	na	na	na	na	na	na	na	na	na	na	na	na	na	na	na	na	na	na	na	na	na	na	na	676	1060	328	419	391	346	535	762	770	1148	1705	2172	840	1105	1344	1526	1412	2267	1960
L156T	na	na	na	na	na	na	na	na	na	na	na	na	na	na	na	na	na	na	na	na	na	na	na	na	na	na	na	na	na	na	220	205	78	118	103	87	125	87	134	107	563	551	209	216	282	248	260	373	229
L156V	na	na	na	na	na	na	na	na	na	na	na	na	na	na	na	na	na	na	na	na	na	na	na	na	na	na	na	na	na	na	308	288	100	87	81	74	118	88	98	80	886	813	286	314	361	307	251	242	256
L156W	na	na	na	na	na	na	na	na	na	na	na	na	na	na	na	na	na	na	na	na	na	na	na	na	na	na	na	na	na	na	214	295	118	180	166	141	232	258	317	334	514	844	339	421	565	558	534	762	602
L156Y	na	na	na	na	na	na	na	na	na	na	na	na	na	na	na	na	na	na	na	na	na	na	na	na	na	na	na	na	na	na	148	359	105	148	149	123	237	294	381	441	429	625	241	356	494	540	606	848	1040
L24*	132	32	12	11	na	17	10	na	na	2	121	19	40	2	3	43	na	na	na	na	188	8	8	8	4	2	2	2	7	11	na	na	na	na	na	na	na	na	na	na	na	na	na	na	na	na	na	na	na
L24A	409	737	413	143	171	128	224	485	283	352	208	504	108	163	130	379	212	166	289	383	451	560	329	197	146	284	316	326	822	487	na	na	na	na	na	na	na	na	na	na	na	na	na	na	na	na	na	na	na
L24C	150	222	83	31	67	38	19	84	13	19	98	199	29	83	40	140	26	36	50	182	145	107	113	42	49	85	41	34	129	121	na	na	na	na	na	na	na	na	na	na	na	na	na	na	na	na	na	na	na
L24D	225	263	105	48	113	101	49	206	96	153	88	252	33	22	88	59	79	71	123	90	168	159	149	55	63	88	78	79	252	185	na	na	na	na	na	na	na	na	na	na	na	na	na	na	na	na	na	na	na
L24E	1005	1470	413	284	464	275	355	616	381	586	587	798	327	379	387	597	359	385	487	582	831	3	606	368	498	471	555	464	1434	912	na	na	na	na	na	na	na	na	na	na	na	na	na	na	na	na	na	na	na
L24F	308	304	158	61	105	144	71	111	70	88	135	403	59	45	50	71	64	73	96	86	237	305	178	96	117	107	99	105	179	169	na	na	na	na	na	na	na	na	na	na	na	na	na	na	na	na	na	na	na
L24G	2414	4394	1385	1226	1050	1286	1230	3050	2167	4344	889	2663	893	841	1020	2889	1688	1425	2381	3533	3	1	2041	1135	1276	1589	1966	2065	6426	3935	na	na	na	na	na	na	na	na	na	na	na	na	na	na	na	na	na	na	na
L24H	110	191	45	22	21	na	14	72	2	10	113	1	87	27	8	8	7	303	7	11	114	3	82	51	22	43	32	15	58	16	na	na	na	na	na	na	na	na	na	na	na	na	na	na	na	na	na	na	na
L24I	198	393	90	62	85	63	86	505	178	216	166	236	74	61	59	125	129	93	156	148	171	212	192	70	91	133	117	135	334	241	na	na	na	na	na	na	na	na	na	na	na	na	na	na	na	na	na	na	na
L24K	1144	1197	402	182	121	101	35	181	36	70	502	991	315	777	175	293	75	68	86	123	1069	1269	600	277	238	251	116	95	167	117	na	na	na	na	na	na	na	na	na	na	na	na	na	na	na	na	na	na	na
L24M	555	579	209	12	25	na	36	39	na	3	183	5	135	69	42	64	4	5	8	71	1	1	161	86	79	133	32	na	64	154	na	na	na	na	na	na	na	na	na	na	na	na	na	na	na	na	na	na	na
L24N	279	345	118	71	89	160	92	83	116	141	95	286	56	40	94	71	75	72	96	118	223	165	227	105	74	133	178	99	283	209	na	na	na	na	na	na	na	na	na	na	na	na	na	na	na	na	na	na	na
L24P	52	15	4	na	na	na	7	5	na	na	39	4	9	7	4	16	na	na	2	13	4	31	7	na	na	2	4	na	na	na	na	na	na	na	na	na	na	na	na	na	na	na	na	na	na	na	na	na	na
L24Q	339	499	92	102	90	190	53	191	69	258	200	3	94	135	89	28	74	61	104	106	1	1	124	109	151	179	151	108	461	297	na	na	na	na	na	na	na	na	na	na	na	na	na	na	na	na	na	na	na
L24R	826	506	89	26	39	19	19	29	12	36	818	1	76	51	24	70	13	9	11	16	963	437	118	61	33	22	23	19	16	12	na	na	na	na	na	na	na	na	na	na	na	na	na	na	na	na	na	na	na
L24S	455	569	183	146	84	53	93	247	36	114	169	413	92	125	81	111	101	77	101	50	342	739	253	107	115	147	162	77	195	179	na	na	na	na	na	na	na	na	na	na	na	na	na	na	na	na	na	na	na
L24T	390	543	199	155	151	138	129	340	145	301	124	346	99	88	144	582	172	156	254	443	356	1	313	192	187	238	258	262	727	494	na	na	na	na	na	na	na	na	na	na	na	na	na	na	na	na	na	na	na
L24V	588	914	274	171	327	341	360	981	593	1065	291	821	201	140	171	174	510	310	568	1793	2	672	636	263	212	355	500	666	1600	956	na	na	na	na	na	na	na	na	na	na	na	na	na	na	na	na	na	na	na
L24W	660	684	201	46	63	56	71	275	50	99	297	501	153	113	114	145	101	88	125	95	551	527	358	159	160	160	132	116	222	166	na	na	na	na	na	na	na	na	na	na	na	na	na	na	na	na	na	na	na
L24Y	157	169	57	35	6	13	12	29	16	15	64	105	34	57	29	36	10	19	24	32	1	144	108	45	46	51	15	18	41	47	na	na	na	na	na	na	na	na	na	na	na	na	na	na	na	na	na	na	na
L28*	192	52	3	7	na	4	na	na	7	8	322	22	39	9	1	25	5	3	3	2	266	52	19	na	na	5	2	na	4	3	na	na	na	na	na	na	na	na	na	na	na	na	na	na	na	na	na	na	na
L28A	1026	1035	290	115	88	58	55	72	28	35	418	803	162	91	85	103	187	42	72	48	908	752	380	207	142	197	75	168	81	80	na	na	na	na	na	na	na	na	na	na	na	na	na	na	na	na	na	na	na
L28C	145	139	24	20	8	14	15	6	7	na	66	117	19	12	12	3	3	na	17	4	1	72	61	31	33	20	14	11	40	17	na	na	na	na	na	na	na	na	na	na	na	na	na	na	na	na	na	na	na
L28D	222	133	267	20	5	na	65	27	4	na	108	105	29	35	9	33	7	3	7	na	197	181	39	26	13	3	10	2	na	14	na	na	na	na	na	na	na	na	na	na	na	na	na	na	na	na	na	na	na
L28E	1182	610	405	33	35	77	14	34	10	16	549	540	113	94	60	31	13	28	25	23	884	806	198	112	83	83	21	12	41	43	na	na	na	na	na	na	na	na	na	na	na	na	na	na	na	na	na	na	na
L28F	147	259	130	2	3	na	3	na	57	na	162	2	na	17	2	na	42	103	2	124	2	3	na	na	2	22	23	15	63	6	na	na	na	na	na	na	na	na	na	na	na	na	na	na	na	na	na	na	na
L28G	1889	1868	531	239	100	231	133	142	80	81	879	1297	416	373	323	613	121	202	189	795	1	1659	865	415	383	360	190	131	318	290	na	na	na	na	na	na	na	na	na	na	na	na	na	na	na	na	na	na	na
L28H	166	119	65	na	na	na	1	3	na	5	79	4	11	7	5	na	na	na	na	na	1	2	na	na	na	na	na	na	na	na	na	na	na	na	na	na	na	na	na	na	na	na	na	na	na	na	na	na	na
L28I	103	202	na	2	na	na	2	8	na	na	67	110	na	4	80	na	na	na	na	2	1	2	na	na	na	na	na	na	na	na	na	na	na	na	na	na	na	na	na	na	na	na	na	na	na	na	na	na	na
L28K	441	145	39	27	12	16	5	na	18	27	418	185	67	13	59	31	8	2	5	35	612	102	26	17	16	8	12	18	19	7	na	na	na	na	na	na	na	na	na	na	na	na	na	na	na	na	na	na	na
L28M	878	1206	329	209	167	105	113	244	109	209	369	903	200	173	213	209	297	170	284	276	759	1215	509	273	310	327	223	224	426	439	na	na	na	na	na	na	na	na	na	na	na	na	na	na	na	na	na	na	na
L28N	497	387	139	46	16	35	25	na	18	31	215	3	79	80	76	24	59	59	52	60	495	467	322	104	140	70	29	44	66	42	na	na	na	na	na	na	na	na	na	na	na	na	na	na	na	na	na	na	na
L28P	362	261	53	26	25	16	10	na	na	8	312	2	64	39	28	21	62	5	13	21	287	2	109	23	15	53	na	14	8	16	na	na	na	na	na	na	na	na	na	na	na	na	na	na	na	na	na	na	na
L28Q	371	257	98	7	15	5	10	14	3	na	237	381	57	48	24	145	10	12	8	5	475	411	91	34	23	25	12	13	7	10	na	na	na	na	na	na	na	na	na	na	na	na	na	na	na	na	na	na	na
L28R	874	429	101	28	113	36	11	32	na	5	652	416	115	65	69	36	9	9	20	6	870	273	129	68	38	33	15	9	32	19	na	na	na	na	na	na	na	na	na	na	na	na	na	na	na	na	na	na	na
L28S	767	633	170	79	44	35	29	163	17	23	431	527	248	146	146	42	34	42	59	86	825	884	277	108	119	129	43	38	76	77	na	na	na	na	na	na	na	na	na	na	na	na	na	na	na	na	na	na	na
L28T	956	756	304	76	104	143	78	105	16	27	635	546	195	184	105	167	63	48	72	31	869	626	434	190	115	206	75	83	119	94	na	na	na	na	na	na	na	na	na	na	na	na	na	na	na	na	na	na	na
L28V	1571	1189	375	96	76	76	66	49	12	25	702	1	213	396	115	95	184	126	71	32	1	1177	471	224	154	220	57	93	106	92	na	na	na	na	na	na	na	na	na	na	na	na	na	na	na	na	na	na	na
L28W	477	488	138	34	24	31	28	30	9	7	350	354	91	73	77	18	16	45	38	8	1	623	181	99	121	65	29	20	45	94	na	na	na	na	na	na	na	na	na	na	na	na	na	na	na	na	na	na	na
L28Y	242	458	99	64	71	47	68	261	92	178	112	181	45	62	76	105	106	72	127	122	196	306	149	85	98	129	121	146	332	209	na	na	na	na	na	na	na	na	na	na	na	na	na	na	na	na	na	na	na
L36*	222	78	13	15	4	18	1	7	na	2	124	6	6	16	8	na	na	4	2	na	7	1	21	8	4	5	5	6	4	4	na	na	na	na	na	na	na	na	na	na	na	na	na	na	na	na	na	na	na
L36A	957	1256	369	245	159	137	98	67	58	124	547	874	741	163	179	419	259	105	127	101	1	633	328	196	130	206	85	76	245	218	na	na	na	na	na	na	na	na	na	na	na	na	na	na	na	na	na	na	na
L36C	552	633	198	76	89	164	60	151	36	43	250	371	104	143	118	113	99	67	89	49	367	853	236	170	131	220	95	74	245	119	na	na	na	na	na	na	na	na	na	na	na	na	na	na	na	na	na	na	na
L36D	500	585	182	155	184	104	95	142	80	138	207	388	79	142	111	210	165	148	156	114	394	462	328	149	152	194	136	206	376	276	na	na	na	na	na	na	na	na	na	na	na	na	na	na	na	na	na	na	na
L36E	894	1486	449	357	254	312	240	401	210	379	385	718	234	206	229	373	405	268	373	384	841	1218	696	410	432	530	437	403	924	618	na	na	na	na	na	na	na	na	na	na	na	na	na	na	na	na	na	na	na
L36F	946	1370	479	404	425	205	448	740	403	843	384	3	223	405	286	867	431	446	554	596	1	1	709	421	377	519	597	617	1537	915	na	na	na	na	na	na	na	na	na	na	na	na	na	na	na	na	na	na	na
L36G	2750	3539	1171	820	1073	682	848	2182	816	1353	1304	1	651	1249	849	1370	1033	1521	1226	1299	6	3169	1965	1147	1255	1554	1359	1267	3552	2359	na	na	na	na	na	na	na	na	na	na	na	na	na	na	na	na	na	na	na
L36H	347	378	121	102	63	162	97	167	58	140	158	300	95	287	119	112	103	89	142	166	275	1	245	135	135	145	169	110	349	262	na	na	na	na	na	na	na	na	na	na	na	na	na	na	na	na	na	na	na
L36I	297	495	313	120	106	79	118	177	81	123	143	2	143	93	84	146	140	292	122	127	3	279	202	135	125	178	173	217	337	353	na	na	na	na	na	na	na	na	na	na	na	na	na	na	na	na	na	na	na
L36K	829	1041	344	241	342	231	266	484	303	637	394	638	223	184	339	321	341	937	387	494	669	1209	529	289	467	472	464	440	1224	762	na	na	na	na	na	na	na	na	na	na	na	na	na	na	na	na	na	na	na
L36M	496	824	408	227	213	276	175	455	191	283	204	494	149	160	193	317	227	172	222	306	499	890	540	247	325	331	314	395	673	454	na	na	na	na	na	na	na	na	na	na	na	na	na	na	na	na	na	na	na
L36N	293	514	145	85	85	96	95	211	129	155	151	225	40	126	94	199	120	99	148	222	1	234	162	171	106	147	140	184	436	304	na	na	na	na	na	na	na	na	na	na	na	na	na	na	na	na	na	na	na
L36P	785	506	269	71	35	41	16	19	13	16	491	428	264	88	101	116	107	18	31	12	634	557	208	116	83	68	20	16	73	41	na	na	na	na	na	na	na	na	na	na	na	na	na	na	na	na	na	na	na
L36Q	517	847	259	172	196	245	249	332	177	379	201	517	188	123	153	235	271	433	292	597	452	547	393	224	572	316	322	322	955	613	na	na	na	na	na	na	na	na	na	na	na	na	na	na	na	na	na	na	na
L36R	1982	2738	979	675	845	528	751	1617	745	1258	872	2096	1774	625	735	2799	714	928	1065	1160	1795	2492	1468	878	918	1118	1121	1217	2753	1797	na	na	na	na	na	na	na	na	na	na	na	na	na	na	na	na	na	na	na
L36S	1150	1612	790	379	418	618	340	537	488	674	742	13	439	295	467	315	629	317	537	1645	6	7	1161	516	614	625	579	516	1514	978	na	na	na	na	na	na	na	na	na	na	na	na	na	na	na	na	na	na	na
L36T	589	1094	284	183	157	218	222	318	154	315	274	568	118	249	194	257	194	144	242	291	524	450	386	276	212	311	260	220	649	423	na	na	na	na	na	na	na	na	na	na	na	na	na	na	na	na	na	na	na
L36V	1526	2155	795	435	407	331	209	656	154	225	466	2	456	451	331	354	334	177	344	269	2	1467	942	534	459	554	316	224	673	564	na	na	na	na	na	na	na	na	na	na	na	na	na	na	na	na	na	na	na
L36W	1213	1796	629	431	366	468	369	587	294	525	566	1021	705	344	385	573	429	418	509	486	1	1	858	553	543	576	558	619	1111	827	na	na	na	na	na	na	na	na	na	na	na	na	na	na	na	na	na	na	na
L36Y	421	674	183	116	210	96	184	300	130	151	187	358	146	219	130	382	126	132	153	173	1	614	297	164	160	238	200	205	516	311	na	na	na	na	na	na	na	na	na	na	na	na	na	na	na	na	na	na	na
L4*	103	32	11	8	11	na	na	na	na	3	108	23	5	2	2	na	na	2	na	9	3	10	6	4	8	na	na	na	na	3	na	na	na	na	na	na	na	na	na	na	na	na	na	na	na	na	na	na	na
L4A	340	282	78	34	56	16	11	51	9	12	100	180	49	28	40	46	30	22	21	12	573	517	236	131	117	160	104	62	253	228	na	na	na	na	na	na	na	na	na	na	na	na	na	na	na	na	na	na	na
L4C	491	561	107	41	70	21	28	38	19	24	250	351	86	64	89	70	34	60	59	29	456	1	280	130	86	154	75	49	70	72	na	na	na	na	na	na	na	na	na	na	na	na	na	na	na	na	na	na	na
L4D	124	17	7	5	26	na	na	na	na	na	58	44	14	5	11	na	na	na	na	na	149	5	12	28	4	na	6	3	6	8	na	na	na	na	na	na	na	na	na	na	na	na	na	na	na	na	na	na	na
L4E	437	440	167	37	60	14	15	36	25	26	239	395	125	45	40	46	13	19	12	4	372	366	197	87	61	95	30	25	50	60	na	na	na	na	na	na	na	na	na	na	na	na	na	na	na	na	na	na	na
L4F	1133	2060	583	507	659	747	799	2069	1198	2374	495	1557	385	858	581	748	670	814	1247	1885	908	1325	1012	595	737	717	1122	1457	3737	2502	na	na	na	na	na	na	na	na	na	na	na	na	na	na	na	na	na	na	na
L4G	1319	807	285	86	68	75	28	51	22	48	769	640	172	108	88	135	64	22	37	35	1458	723	396	179	104	111	40	54	52	71	na	na	na	na	na	na	na	na	na	na	na	na	na	na	na	na	na	na	na
L4H	550	683	288	174	160	170	191	304	216	428	334	559	112	109	153	149	185	219	256	360	528	865	548	240	339	384	290	177	841	423	na	na	na	na	na	na	na	na	na	na	na	na	na	na	na	na	na	na	na
L4I	372	546	190	126	269	157	192	385	144	363	228	433	115	98	132	478	161	240	301	505	345	646	346	165	409	221	247	210	730	394	na	na	na	na	na	na	na	na	na	na	na	na	na	na	na	na	na	na	na
L4K	474	104	53	17	18	5	1	na	na	12	442	135	128	187	30	55	na	25	6	52	508	80	64	18	18	14	7	14	17	22	na	na	na	na	na	na	na	na	na	na	na	na	na	na	na	na	na	na	na
L4M	207	543	2	4	2	na	4	8	2	3	37	2	49	10	7	na	na	4	6	4	1	2	na	2	na	na	3	na	na	na	na	na	na	na	na	na	na	na	na	na	na	na	na	na	na	na	na	na	na
L4N	494	748	215	133	117	162	130	192	104	210	257	512	96	125	162	317	101	127	173	222	424	460	411	171	218	260	170	183	422	284	na	na	na	na	na	na	na	na	na	na	na	na	na	na	na	na	na	na	na
L4P	793	467	176	72	73	44	12	21	42	19	493	6	165	92	65	86	10	10	25	7	6	8	644	134	127	109	33	47	58	62	na	na	na	na	na	na	na	na	na	na	na	na	na	na	na	na	na	na	na
L4Q	531	684	232	474	28	11	36	na	4	8	272	2	55	42	134	134	10	na	7	28	5	3	197	141	140	139	75	37	98	105	na	na	na	na	na	na	na	na	na	na	na	na	na	na	na	na	na	na	na
L4R	415	90	19	2	34	na	10	20	7	41	503	70	31	15	5	2	4	3	8	3	2	31	26	21	11	13	2	9	10	7	na	na	na	na	na	na	na	na	na	na	na	na	na	na	na	na	na	na	na
L4S	1088	1218	431	180	163	100	137	353	83	166	493	922	245	163	159	174	105	142	171	189	1091	1208	675	337	340	381	239	184	556	383	na	na	na	na	na	na	na	na	na	na	na	na	na	na	na	na	na	na	na
L4T	682	828	208	135	130	156	94	553	257	142	261	7	219	161	170	147	104	124	152	128	750	613	421	282	282	356	229	202	499	323	na	na	na	na	na	na	na	na	na	na	na	na	na	na	na	na	na	na	na
L4V	1380	1356	390	172	279	182	105	270	116	139	544	2	412	228	226	391	154	121	175	175	2	1213	800	372	347	398	272	189	462	400	na	na	na	na	na	na	na	na	na	na	na	na	na	na	na	na	na	na	na
L4W	122	41	2	8	10	3	4	na	2	3	89	36	19	1	5	na	na	na	na	5	2	16	13	na	na	6	5	na	6	4	na	na	na	na	na	na	na	na	na	na	na	na	na	na	na	na	na	na	na
L4Y	340	530	158	119	113	150	151	243	171	458	211	421	125	173	117	336	243	300	329	343	340	3	215	135	150	224	169	266	768	451	na	na	na	na	na	na	na	na	na	na	na	na	na	na	na	na	na	na	na
L54*	15	2	na	na	na	na	1	na	na	na	1	3	na	2	1	na	na	2	na	na	na	na	na	na	na	na	na	na	na	na	92	na	2	na	1	na	na	na	na	na	na	na	na	na	na	na	na	na	na
L54A	569	404	117	68	82	23	25	42	32	18	265	301	163	89	52	130	38	129	59	22	na	na	na	na	na	na	na	na	na	na	499	356	53	47	34	33	21	18	20	6	na	na	na	na	na	na	na	na	na
L54C	147	178	69	21	39	17	42	3	33	14	147	91	85	20	35	19	24	21	37	20	na	na	na	na	na	na	na	na	na	na	135	119	39	33	21	25	18	20	12	13	na	na	na	na	na	na	na	na	na
L54D	101	14	3	7	9	na	1	na	na	na	242	29	8	3	na	5	4	2	na	na	na	na	na	na	na	na	na	na	na	na	52	30	2	2	1	na	na	3	na	na	na	na	na	na	na	na	na	na	na
L54E	197	36	9	na	2	4	2	3	na	na	372	45	28	10	2	na	4	2	na	2	na	na	na	na	na	na	na	na	na	na	216	30	6	5	1	1	na	6	na	4	na	na	na	na	na	na	na	na	na
L54F	340	2	227	134	200	166	160	188	138	192	230	355	134	107	117	334	348	201	156	278	na	na	na	na	na	na	na	na	na	na	345	468	905	885	757	651	975	899	1012	697	na	na	na	na	na	na	na	na	na
L54G	710	107	54	27	29	na	6	8	4	5	1118	190	113	137	57	33	10	4	10	17	na	na	na	na	na	na	na	na	na	na	624	163	32	30	17	21	9	10	9	7	na	na	na	na	na	na	na	na	na
L54H	186	35	20	9	11	15	3	na	na	na	330	50	48	14	9	na	2	na	2	na	na	na	na	na	na	na	na	na	na	na	156	29	4	7	6	4	3	2	2	4	na	na	na	na	na	na	na	na	na
L54I	310	257	92	80	236	24	40	40	43	39	163	272	64	85	52	82	66	64	81	73	na	na	na	na	na	na	na	na	na	na	249	236	2618	2421	1882	1602	2245	2426	2064	1596	na	na	na	na	na	na	na	na	na
L54K	363	63	30	12	10	5	2	na	na	10	491	129	74	21	24	14	8	3	4	8	na	na	na	na	na	na	na	na	na	na	310	73	19	15	6	9	4	8	na	2	na	na	na	na	na	na	na	na	na
L54M	373	478	206	136	172	303	157	285	138	347	1	267	107	115	114	75	257	183	238	258	na	na	na	na	na	na	na	na	na	na	370	398	94	91	76	55	87	108	120	124	na	na	na	na	na	na	na	na	na
L54N	296	120	37	28	61	5	1	12	na	na	596	136	56	57	31	29	6	7	17	7	na	na	na	na	na	na	na	na	na	na	262	132	14	18	5	10	2	4	6	na	na	na	na	na	na	na	na	na	na
L54P	696	680	264	110	134	90	76	103	21	34	1	496	274	208	123	881	79	53	106	114	na	na	na	na	na	na	na	na	na	na	747	499	78	85	56	59	53	26	43	16	na	na	na	na	na	na	na	na	na
L54Q	131	63	39	23	2	3	1	60	2	na	99	68	33	27	14	74	18	2	3	na	na	na	na	na	na	na	na	na	na	na	126	73	14	16	7	8	5	na	2	2	na	na	na	na	na	na	na	na	na
L54R	412	151	34	16	23	11	6	na	2	na	718	126	77	58	55	7	19	2	8	7	na	na	na	na	na	na	na	na	na	na	389	115	41	12	16	14	10	na	3	na	na	na	na	na	na	na	na	na	na
L54S	276	6	94	21	32	42	27	4	na	2	3	201	95	67	75	103	31	42	32	4	na	na	na	na	na	na	na	na	na	na	420	161	30	35	18	16	17	3	10	3	na	na	na	na	na	na	na	na	na
L54T	670	672	192	55	74	117	52	43	17	43	1	465	265	145	146	64	97	55	75	64	na	na	na	na	na	na	na	na	na	na	745	384	97	78	50	28	36	39	31	15	na	na	na	na	na	na	na	na	na
L54V	851	829	341	161	173	125	106	118	19	66	498	491	197	309	180	291	305	168	133	93	na	na	na	na	na	na	na	na	na	na	777	650	113	110	99	57	95	63	93	27	na	na	na	na	na	na	na	na	na
L54W	94	na	4	13	na	na	na	11	na	na	153	37	15	5	7	12	na	na	na	na	na	na	na	na	na	na	na	na	na	na	127	19	3	2	na	na	na	na	na	na	na	na	na	na	na	na	na	na	na
L54Y	168	30	11	na	5	11	1	na	na	na	200	46	35	6	14	15	3	na	na	10	na	na	na	na	na	na	na	na	na	na	245	64	17	8	2	7	2	na	na	na	na	na	na	na	na	na	na	na	na
L62*	48	11	6	11	2	na	na	9	na	na	207	11	na	2	3	na	2	na	na	na	na	na	na	na	na	na	na	na	na	na	55	12	7	4	1	3	4	na	2	na	na	na	na	na	na	na	na	na	na
L62A	534	834	345	256	341	324	398	1057	410	687	474	364	143	206	253	831	298	343	526	1328	na	na	na	na	na	na	na	na	na	na	659	1001	139	269	243	196	359	367	482	476	na	na	na	na	na	na	na	na	na
L62C	230	305	126	130	137	207	186	381	158	467	161	176	52	96	73	719	134	131	227	460	na	na	na	na	na	na	na	na	na	na	247	306	92	94	68	78	142	181	178	223	na	na	na	na	na	na	na	na	na
L62D	44	5	na	na	3	na	na	na	na	na	69	9	6	8	7	na	2	na	na	na	na	na	na	na	na	na	na	na	na	na	30	12	2	2	1	5	11	6	2	2	na	na	na	na	na	na	na	na	na
L62E	244	127	59	34	13	17	8	32	na	13	176	89	38	90	44	58	18	11	25	31	na	na	na	na	na	na	na	na	na	na	274	131	16	25	22	12	13	6	11	3	na	na	na	na	na	na	na	na	na
L62F	314	537	263	126	257	286	216	300	207	313	1	264	110	53	171	430	151	165	231	465	na	na	na	na	na	na	na	na	na	na	411	667	128	154	135	122	197	216	212	248	na	na	na	na	na	na	na	na	na
L62G	375	122	24	15	8	11	10	na	3	3	484	156	109	185	39	51	16	76	10	2	na	na	na	na	na	na	na	na	na	na	577	126	25	31	26	7	8	20	13	23	na	na	na	na	na	na	na	na	na
L62H	447	552	215	88	108	86	120	360	74	183	1	300	113	72	116	247	113	148	229	230	na	na	na	na	na	na	na	na	na	na	443	466	110	95	56	73	78	88	97	115	na	na	na	na	na	na	na	na	na
L62I	293	2	161	94	101	244	207	340	129	407	2	156	45	32	60	38	171	109	143	420	na	na	na	na	na	na	na	na	na	na	231	294	56	48	51	65	89	153	150	208	na	na	na	na	na	na	na	na	na
L62K	322	461	151	44	161	29	50	76	46	25	219	221	96	74	65	180	47	33	54	15	na	na	na	na	na	na	na	na	na	na	408	327	89	90	70	68	56	55	64	39	na	na	na	na	na	na	na	na	na
L62M	209	280	120	83	122	118	92	176	81	205	133	159	41	40	104	89	123	95	131	222	na	na	na	na	na	na	na	na	na	na	242	389	88	86	65	63	116	87	110	144	na	na	na	na	na	na	na	na	na
L62N	289	148	69	25	20	29	12	26	16	33	155	167	71	121	92	49	21	119	53	29	na	na	na	na	na	na	na	na	na	na	382	210	38	43	31	23	21	20	23	8	na	na	na	na	na	na	na	na	na
L62P	556	2	33	33	16	26	10	35	2	6	653	267	118	69	54	46	23	8	18	122	na	na	na	na	na	na	na	na	na	na	585	266	18	18	17	12	8	9	19	17	na	na	na	na	na	na	na	na	na
L62Q	375	482	228	148	152	197	155	289	91	137	228	225	213	228	115	158	114	123	189	219	na	na	na	na	na	na	na	na	na	na	426	506	124	153	121	98	120	138	136	117	na	na	na	na	na	na	na	na	na
L62R	369	82	21	17	17	7	10	10	13	na	402	90	77	57	27	167	5	8	5	13	na	na	na	na	na	na	na	na	na	na	351	73	20	15	8	10	2	24	18	6	na	na	na	na	na	na	na	na	na
L62S	469	590	250	130	107	126	107	325	119	127	429	360	244	220	147	219	187	197	229	250	na	na	na	na	na	na	na	na	na	na	731	523	140	141	121	95	111	106	117	99	na	na	na	na	na	na	na	na	na
L62T	539	1372	435	432	542	501	461	989	728	1179	324	524	181	210	327	284	472	601	680	1129	na	na	na	na	na	na	na	na	na	na	650	1015	227	274	300	256	390	585	554	891	na	na	na	na	na	na	na	na	na
L62V	742	2	528	452	558	661	704	1328	894	1539	694	622	266	237	324	1104	657	632	818	1311	na	na	na	na	na	na	na	na	na	na	859	1290	339	420	380	339	641	751	826	1205	na	na	na	na	na	na	na	na	na
L62W	489	686	370	224	240	238	103	147	112	122	231	323	130	136	141	383	147	182	112	190	na	na	na	na	na	na	na	na	na	na	486	823	153	204	158	107	158	134	139	83	na	na	na	na	na	na	na	na	na
L62Y	2	345	152	96	167	95	91	70	55	93	213	187	72	51	104	104	40	42	94	72	na	na	na	na	na	na	na	na	na	na	271	316	60	71	73	46	71	51	48	24	na	na	na	na	na	na	na	na	na
L8*	568	102	64	25	16	10	12	84	2	12	472	2	91	14	23	6	7	3	8	na	660	1600	33	23	10	13	7	7	9	40	na	na	na	na	na	na	na	na	na	na	na	na	na	na	na	na	na	na	na
L8A	753	1141	337	232	228	181	139	187	172	222	417	647	184	198	196	252	669	136	243	297	1	659	332	242	263	252	217	194	482	393	na	na	na	na	na	na	na	na	na	na	na	na	na	na	na	na	na	na	na
L8C	16	27	6	5	2	2	3	na	na	9	na	11	na	4	7	na	7	144	16	na	14	10	13	7	7	16	9	2	13	9	na	na	na	na	na	na	na	na	na	na	na	na	na	na	na	na	na	na	na
L8D	163	92	22	23	15	5	4	na	na	na	98	89	118	23	7	16	4	2	3	14	23	21	3	9	4	3	na	na	na	na	na	na	na	na	na	na	na	na	na	na	na	na	na	na	na	na	na	na	na
L8E	4147	7258	2165	1485	1450	1598	1415	2618	1450	2012	1637	4047	1170	1485	1345	3223	1723	1503	2133	2686	3380	4871	3615	2018	2038	2461	2285	2233	5595	3906	na	na	na	na	na	na	na	na	na	na	na	na	na	na	na	na	na	na	na
L8F	24	44	na	14	na	2	17	23	na	na	30	2	23	13	3	na	10	na	6	na	2	276	13	8	3	4	na	4	9	na	na	na	na	na	na	na	na	na	na	na	na	na	na	na	na	na	na	na	na
L8G	3721	4580	1298	639	573	538	400	593	275	373	2069	2	867	773	680	919	502	472	545	357	3029	2	2146	984	787	1062	598	475	1113	952	na	na	na	na	na	na	na	na	na	na	na	na	na	na	na	na	na	na	na
L8H	72	90	81	15	3	na	19	44	7	5	112	54	18	13	5	29	9	8	20	16	53	72	101	21	17	29	11	11	35	43	na	na	na	na	na	na	na	na	na	na	na	na	na	na	na	na	na	na	na
L8I	223	191	47	7	12	6	7	na	3	na	80	114	32	20	59	14	6	12	9	9	102	1	60	8	3	13	10	3	na	5	na	na	na	na	na	na	na	na	na	na	na	na	na	na	na	na	na	na	na
L8K	5915	10982	3846	2138	2713	2456	2035	3837	1858	3483	2634	1	1842	2122	2201	3686	2941	2834	2871	4318	1	2	5796	3065	3453	3988	3822	3664	8685	6315	na	na	na	na	na	na	na	na	na	na	na	na	na	na	na	na	na	na	na
L8M	1782	2629	784	450	626	513	400	647	342	675	837	1491	518	984	400	882	584	453	638	669	1445	1830	1429	657	713	805	713	647	1597	1183	na	na	na	na	na	na	na	na	na	na	na	na	na	na	na	na	na	na	na
L8N	228	283	107	45	30	21	28	43	41	47	364	234	47	42	137	86	26	10	37	9	181	207	121	75	70	66	48	33	194	60	na	na	na	na	na	na	na	na	na	na	na	na	na	na	na	na	na	na	na
L8P	333	435	108	26	31	13	18	24	4	20	278	243	58	74	59	18	79	26	16	7	305	1471	111	63	70	65	25	14	31	33	na	na	na	na	na	na	na	na	na	na	na	na	na	na	na	na	na	na	na
L8Q	1195	1334	456	243	176	234	235	189	90	206	641	1001	289	295	276	604	152	114	197	199	959	1472	689	403	579	465	243	203	431	363	na	na	na	na	na	na	na	na	na	na	na	na	na	na	na	na	na	na	na
L8R	7429	12298	3814	2176	2330	2342	1842	3738	1532	2360	3756	2	2034	2365	2300	3208	2310	2404	2374	2658	4	1	6345	3528	3688	4108	3423	2680	6907	5292	na	na	na	na	na	na	na	na	na	na	na	na	na	na	na	na	na	na	na
L8S	693	909	277	143	126	97	104	231	60	106	242	1	318	209	166	274	207	91	157	100	604	3	366	219	268	220	162	201	305	245	na	na	na	na	na	na	na	na	na	na	na	na	na	na	na	na	na	na	na
L8T	1645	2775	807	520	739	579	578	1089	446	963	742	1500	697	528	498	1184	654	460	748	1116	1227	3130	1149	668	720	844	868	1009	2256	1551	na	na	na	na	na	na	na	na	na	na	na	na	na	na	na	na	na	na	na
L8V	1633	1869	611	288	300	351	220	306	75	181	648	1	335	426	337	493	282	192	239	194	3	777	491	311	309	396	257	159	425	329	na	na	na	na	na	na	na	na	na	na	na	na	na	na	na	na	na	na	na
L8W	671	1305	339	193	276	171	144	225	129	165	235	658	128	200	164	264	168	111	182	224	1	1200	726	434	447	515	432	343	787	646	na	na	na	na	na	na	na	na	na	na	na	na	na	na	na	na	na	na	na
L8Y	56	54	15	4	na	21	6	na	5	4	62	55	17	9	12	na	5	4	7	4	45	65	32	24	48	21	13	5	26	20	na	na	na	na	na	na	na	na	na	na	na	na	na	na	na	na	na	na	na
M16*	450	101	49	27	35	11	3	na	29	38	493	62	13	18	18	22	9	2	5	11	485	116	43	23	14	11	7	na	11	11	na	na	na	na	na	na	na	na	na	na	na	na	na	na	na	na	na	na	na
M16A	705	1152	389	285	410	278	312	738	333	677	336	780	229	268	320	354	454	391	418	805	604	976	665	361	329	397	433	476	1396	867	na	na	na	na	na	na	na	na	na	na	na	na	na	na	na	na	na	na	na
M16C	478	735	247	177	155	165	151	317	142	272	180	494	158	111	144	228	163	123	191	238	365	438	340	199	210	239	285	220	703	491	na	na	na	na	na	na	na	na	na	na	na	na	na	na	na	na	na	na	na
M16D	549	818	271	102	126	81	87	101	56	79	329	754	255	321	115	104	69	86	118	111	464	539	364	226	278	227	135	88	203	197	na	na	na	na	na	na	na	na	na	na	na	na	na	na	na	na	na	na	na
M16E	2331	3129	1092	431	532	293	389	665	238	325	833	2	609	626	486	695	294	345	313	412	3	2274	1665	742	922	923	549	496	879	687	na	na	na	na	na	na	na	na	na	na	na	na	na	na	na	na	na	na	na
M16F	867	720	159	40	64	34	28	74	9	21	419	370	93	105	90	61	21	27	25	36	640	1	207	119	60	108	38	13	135	22	na	na	na	na	na	na	na	na	na	na	na	na	na	na	na	na	na	na	na
M16G	2020	2819	706	255	224	114	179	201	87	98	855	1463	532	442	243	382	136	159	177	179	1636	1441	928	418	298	457	196	218	366	331	na	na	na	na	na	na	na	na	na	na	na	na	na	na	na	na	na	na	na
M16H	403	441	129	77	64	25	21	50	15	16	277	325	135	69	56	57	54	24	54	40	316	570	177	97	60	93	71	64	90	68	na	na	na	na	na	na	na	na	na	na	na	na	na	na	na	na	na	na	na
M16I	762	1381	178	98	152	5	50	na	na	na	357	7	68	126	93	120	10	25	33	na	4	3	407	177	222	191	131	64	282	136	na	na	na	na	na	na	na	na	na	na	na	na	na	na	na	na	na	na	na
M16K	2578	3118	1356	562	418	414	445	677	272	327	1389	4	930	773	492	1030	652	499	578	465	1	2246	1442	764	723	892	595	539	1215	992	na	na	na	na	na	na	na	na	na	na	na	na	na	na	na	na	na	na	na
M16L	2990	3919	1097	780	840	573	657	1350	621	704	1467	4	696	577	740	1163	907	745	845	1066	1	8	1740	879	986	1160	1081	965	2340	1446	na	na	na	na	na	na	na	na	na	na	na	na	na	na	na	na	na	na	na
M16N	561	693	258	73	90	111	51	54	43	33	232	463	108	406	86	120	234	37	74	32	528	542	296	183	201	188	61	86	106	125	na	na	na	na	na	na	na	na	na	na	na	na	na	na	na	na	na	na	na
M16P	243	81	35	4	22	5	3	na	na	5	169	66	55	11	8	na	na	na	3	na	182	132	20	10	5	2	2	6	na	na	na	na	na	na	na	na	na	na	na	na	na	na	na	na	na	na	na	na	na
M16Q	1313	2551	695	352	344	377	326	833	300	480	700	1305	356	374	374	723	433	542	633	407	923	2151	1132	559	578	664	538	518	1241	841	na	na	na	na	na	na	na	na	na	na	na	na	na	na	na	na	na	na	na
M16R	4004	5600	1572	1061	1200	1300	1078	1564	947	1517	1523	3278	1021	931	906	2783	1349	1188	1571	2269	4	4621	2843	1512	1533	1943	1646	1585	4128	2775	na	na	na	na	na	na	na	na	na	na	na	na	na	na	na	na	na	na	na
M16S	1265	2640	864	534	586	573	634	1372	673	1260	744	1	398	441	440	751	664	572	807	1429	1066	2	1215	680	798	854	793	929	2591	1566	na	na	na	na	na	na	na	na	na	na	na	na	na	na	na	na	na	na	na
M16T	1061	1438	415	252	322	123	256	580	377	336	411	4	310	278	190	318	231	207	319	1036	1	3	713	367	267	466	286	322	964	734	na	na	na	na	na	na	na	na	na	na	na	na	na	na	na	na	na	na	na
M16V	2146	3803	1063	825	848	1252	922	2032	1170	1680	915	1	825	823	913	1093	1232	958	1362	1632	1	4	1632	954	996	1236	1251	1354	3530	2529	na	na	na	na	na	na	na	na	na	na	na	na	na	na	na	na	na	na	na
M16W	1180	1309	417	257	200	177	201	440	154	320	481	955	233	363	250	302	206	190	343	275	1	2	587	336	352	418	313	353	702	498	na	na	na	na	na	na	na	na	na	na	na	na	na	na	na	na	na	na	na
M16Y	573	498	160	44	18	12	13	23	8	na	298	305	94	53	41	89	15	12	24	40	429	1	185	86	43	66	35	12	17	42	na	na	na	na	na	na	na	na	na	na	na	na	na	na	na	na	na	na	na
M1I	98	153	5	2	na	2	12	4	2	2	7	12	na	12	4	2	20	11	24	9	65	17	3	na	na	na	na	na	13	18	na	na	na	na	na	na	na	na	na	na	na	na	na	na	na	na	na	na	na
M1K	2	2	2	na	na	na	3	na	na	na	3	1	2	8	na	2	na	na	na	na	3	1	na	na	na	na	na	na	na	na	na	na	na	na	na	na	na	na	na	na	na	na	na	na	na	na	na	na	na
M1L	na	2	2	2	2	na	3	na	na	na	1	3	na	1	1	na	na	na	na	na	3	3	na	na	na	na	na	na	na	na	na	na	na	na	na	na	na	na	na	na	na	na	na	na	na	na	na	na	na
M1R	na	na	na	na	na	na	na	na	na	na	1	na	na	na	na	na	na	na	na	na	1	na	na	na	na	na	na	na	na	na	na	na	na	na	na	na	na	na	na	na	na	na	na	na	na	na	na	na	na
M1T	na	2	na	na	na	na	4	na	2	na	1	3	na	4	5	na	na	na	na	na	2	2	na	na	na	na	na	na	na	na	na	na	na	na	na	na	na	na	na	na	na	na	na	na	na	na	na	na	na
M1V	2	na	na	na	na	na	2	na	na	na	4	4	na	8	3	na	na	na	na	2	1	na	na	na	na	na	na	na	na	na	na	na	na	na	na	na	na	na	na	na	na	na	na	na	na	na	na	na	na
M20*	124	24	13	4	na	na	3	na	na	na	142	13	12	4	1	na	na	na	5	na	109	17	3	na	10	2	na	3	na	na	na	na	na	na	na	na	na	na	na	na	na	na	na	na	na	na	na	na	na
M20A	415	242	78	20	46	26	3	6	2	3	268	257	49	27	18	na	9	na	4	7	422	133	75	30	11	8	12	24	5	9	na	na	na	na	na	na	na	na	na	na	na	na	na	na	na	na	na	na	na
M20C	233	141	47	14	24	na	55	na	na	na	90	152	39	32	18	9	7	185	11	10	194	217	62	34	20	25	10	3	19	12	na	na	na	na	na	na	na	na	na	na	na	na	na	na	na	na	na	na	na
M20D	84	15	16	na	6	7	8	na	na	2	101	17	10	1	na	21	2	na	na	na	70	19	6	2	2	2	na	na	na	na	na	na	na	na	na	na	na	na	na	na	na	na	na	na	na	na	na	na	na
M20E	552	484	153	43	105	430	15	55	8	28	198	2	136	126	41	32	14	53	49	32	396	388	187	80	52	68	19	24	46	38	na	na	na	na	na	na	na	na	na	na	na	na	na	na	na	na	na	na	na
M20F	240	249	51	45	12	9	8	46	53	10	110	122	44	22	16	13	13	11	14	25	167	110	101	47	38	29	12	5	15	31	na	na	na	na	na	na	na	na	na	na	na	na	na	na	na	na	na	na	na
M20G	982	366	148	83	83	12	12	53	27	35	817	382	283	58	95	43	21	11	18	36	1	530	108	48	24	34	15	10	17	16	na	na	na	na	na	na	na	na	na	na	na	na	na	na	na	na	na	na	na
M20H	66	11	25	5	na	4	3	na	na	13	33	27	15	5	1	8	na	na	na	12	59	17	6	3	na	2	na	na	4	na	na	na	na	na	na	na	na	na	na	na	na	na	na	na	na	na	na	na	na
M20I	285	92	na	2	na	na	3	na	na	2	190	4	960	3	4	2	na	na	na	na	5	2	na	na	na	na	na	na	na	na	na	na	na	na	na	na	na	na	na	na	na	na	na	na	na	na	na	na	na
M20K	141	na	na	na	na	na	5	na	na	na	249	3	na	4	4	na	na	na	na	na	2	2	na	na	na	na	na	na	na	na	na	na	na	na	na	na	na	na	na	na	na	na	na	na	na	na	na	na	na
M20L	920	740	218	60	57	36	28	37	11	16	464	2	232	204	124	259	47	45	60	53	703	1	300	143	96	122	47	47	120	75	na	na	na	na	na	na	na	na	na	na	na	na	na	na	na	na	na	na	na
M20N	253	168	37	12	12	na	7	na	3	7	111	79	21	19	10	5	2	2	6	na	161	49	19	12	4	10	9	2	7	15	na	na	na	na	na	na	na	na	na	na	na	na	na	na	na	na	na	na	na
M20P	333	154	33	16	15	11	1	9	na	na	276	167	58	62	15	na	38	2	7	na	273	194	47	27	18	5	8	2	7	3	na	na	na	na	na	na	na	na	na	na	na	na	na	na	na	na	na	na	na
M20Q	317	232	55	23	25	22	5	na	3	5	138	233	63	17	19	29	5	6	19	na	238	128	76	28	12	32	8	10	16	28	na	na	na	na	na	na	na	na	na	na	na	na	na	na	na	na	na	na	na
M20R	619	36	13	5	19	16	2	4	na	3	640	67	23	8	11	na	2	2	2	na	654	1	3	3	6	5	2	na	na	5	na	na	na	na	na	na	na	na	na	na	na	na	na	na	na	na	na	na	na
M20S	615	321	124	59	16	23	10	10	9	2	275	287	65	35	30	50	8	6	16	45	528	144	106	39	20	21	17	12	17	14	na	na	na	na	na	na	na	na	na	na	na	na	na	na	na	na	na	na	na
M20T	320	174	53	21	9	na	7	21	4	32	210	2	77	22	19	11	16	5	8	7	298	2	57	19	13	20	7	3	17	12	na	na	na	na	na	na	na	na	na	na	na	na	na	na	na	na	na	na	na
M20V	694	286	49	20	9	6	19	14	na	6	370	3	39	50	21	29	3	8	8	8	1	4	78	26	13	9	9	na	16	4	na	na	na	na	na	na	na	na	na	na	na	na	na	na	na	na	na	na	na
M20W	324	287	82	43	22	14	15	154	12	21	140	233	40	49	28	77	7	11	13	44	265	250	82	53	122	38	10	18	13	21	na	na	na	na	na	na	na	na	na	na	na	na	na	na	na	na	na	na	na
M20Y	197	172	39	22	4	22	7	32	3	na	145	110	24	83	29	21	3	10	3	na	160	142	49	33	30	10	7	7	17	11	na	na	na	na	na	na	na	na	na	na	na	na	na	na	na	na	na	na	na
M42*	291	15	24	4	8	3	3	21	10	15	1	30	33	14	10	11	11	2	7	12	na	na	na	na	na	na	na	na	na	na	224	78	11	11	8	5	7	6	7	7	na	na	na	na	na	na	na	na	na
M42A	510	489	221	192	322	120	120	185	96	122	1	270	128	112	138	206	200	132	189	209	na	na	na	na	na	na	na	na	na	na	422	523	92	89	90	72	123	78	96	61	na	na	na	na	na	na	na	na	na
M42C	64	3	26	5	12	22	2	na	12	3	51	43	39	10	18	4	16	13	19	na	na	na	na	na	na	na	na	na	na	na	71	77	20	12	15	14	16	14	8	15	na	na	na	na	na	na	na	na	na
M42D	87	4	2	2	na	na	2	na	na	na	93	7	2	4	5	16	3	na	3	10	na	na	na	na	na	na	na	na	na	na	69	20	7	2	9	1	na	2	na	na	na	na	na	na	na	na	na	na	na
M42E	1030	806	478	314	289	257	131	310	103	147	1	643	374	252	375	348	256	188	285	401	na	na	na	na	na	na	na	na	na	na	1093	932	190	235	187	119	203	121	150	83	na	na	na	na	na	na	na	na	na
M42F	2	287	148	87	128	146	101	298	214	287	46	172	43	57	104	78	422	133	237	308	na	na	na	na	na	na	na	na	na	na	149	7	57	74	60	59	103	130	121	123	na	na	na	na	na	na	na	na	na
M42G	2973	3513	1851	981	1082	1090	824	1273	692	783	2240	1926	1021	1613	966	3121	1162	1241	1010	823	na	na	na	na	na	na	na	na	na	na	2650	3283	663	786	667	499	767	576	578	535	na	na	na	na	na	na	na	na	na
M42H	127	257	152	115	43	53	86	146	64	87	37	104	35	40	96	47	110	52	94	115	na	na	na	na	na	na	na	na	na	na	200	190	53	52	41	52	77	66	91	105	na	na	na	na	na	na	na	na	na
M42I	252	2	54	na	na	50	14	na	15	4	1	171	86	20	24	15	7	2	na	59	na	na	na	na	na	na	na	na	na	na	191	117	18	12	19	12	7	na	6	na	na	na	na	na	na	na	na	na	na
M42K	425	4	161	35	103	na	16	na	na	na	1	252	73	80	61	2	28	9	4	na	na	na	na	na	na	na	na	na	na	na	475	2	20	42	19	12	2	na	na	na	na	na	na	na	na	na	na	na	na
M42L	1075	1431	534	468	509	734	480	1059	518	998	1	693	466	399	302	441	661	746	717	721	na	na	na	na	na	na	na	na	na	na	1268	1339	240	261	276	235	320	316	389	347	na	na	na	na	na	na	na	na	na
M42N	98	12	26	14	na	12	4	17	na	5	1	75	47	19	14	44	9	9	13	10	na	na	na	na	na	na	na	na	na	na	111	61	12	11	25	9	2	4	6	6	na	na	na	na	na	na	na	na	na
M42P	93	6	2	2	2	11	5	na	na	2	80	13	3	4	5	na	3	2	2	na	na	na	na	na	na	na	na	na	na	na	57	16	16	5	2	3	na	na	na	na	na	na	na	na	na	na	na	na	na
M42Q	568	927	434	299	408	529	480	900	490	738	1	483	391	363	413	291	393	333	634	751	na	na	na	na	na	na	na	na	na	na	584	856	243	201	219	197	342	318	378	425	na	na	na	na	na	na	na	na	na
M42R	2	133	48	10	39	na	3	na	3	10	938	201	151	100	92	42	70	14	14	35	na	na	na	na	na	na	na	na	na	na	587	217	32	27	17	8	10	5	8	4	na	na	na	na	na	na	na	na	na
M42S	556	923	655	252	302	337	208	439	240	414	450	402	143	185	236	440	251	379	376	386	na	na	na	na	na	na	na	na	na	na	581	635	146	173	158	131	155	254	230	312	na	na	na	na	na	na	na	na	na
M42T	427	359	111	88	28	141	30	112	6	20	2	235	53	214	76	87	61	138	25	25	na	na	na	na	na	na	na	na	na	na	163	78	15	25	22	13	19	10	14	15	na	na	na	na	na	na	na	na	na
M42V	781	552	222	108	48	50	24	14	19	na	924	332	160	201	249	161	91	29	64	107	na	na	na	na	na	na	na	na	na	na	847	646	77	81	51	41	33	38	13	2	na	na	na	na	na	na	na	na	na
M42W	3	376	157	51	29	20	29	35	6	33	8	289	172	78	56	132	93	51	52	25	na	na	na	na	na	na	na	na	na	na	661	353	74	63	36	25	32	17	23	7	na	na	na	na	na	na	na	na	na
M42Y	195	217	102	87	174	87	113	319	142	441	47	143	32	55	162	57	136	94	166	162	na	na	na	na	na	na	na	na	na	na	167	221	49	58	62	51	105	101	96	90	na	na	na	na	na	na	na	na	na
M92*	na	na	na	na	na	na	na	na	na	na	na	na	na	na	na	na	na	na	na	na	74	9	na	6	na	na	3	na	na	na	na	na	na	na	na	na	na	na	na	na	142	34	14	3	8	na	4	13	na
M92A	na	na	na	na	na	na	na	na	na	na	na	na	na	na	na	na	na	na	na	na	405	610	465	308	311	355	418	468	1142	851	na	na	na	na	na	na	na	na	na	na	1182	1174	459	616	703	759	786	1252	1146
M92C	na	na	na	na	na	na	na	na	na	na	na	na	na	na	na	na	na	na	na	na	174	343	272	129	164	190	245	234	721	443	na	na	na	na	na	na	na	na	na	na	599	735	262	339	395	350	411	602	584
M92D	na	na	na	na	na	na	na	na	na	na	na	na	na	na	na	na	na	na	na	na	244	86	81	34	22	44	9	22	11	9	na	na	na	na	na	na	na	na	na	na	629	406	85	38	52	51	16	44	19
M92E	na	na	na	na	na	na	na	na	na	na	na	na	na	na	na	na	na	na	na	na	407	198	197	101	61	79	30	33	42	41	na	na	na	na	na	na	na	na	na	na	1244	650	210	113	120	90	61	55	57
M92F	na	na	na	na	na	na	na	na	na	na	na	na	na	na	na	na	na	na	na	na	135	194	181	98	122	151	243	249	654	433	na	na	na	na	na	na	na	na	na	na	439	719	220	316	424	374	431	736	673
M92G	na	na	na	na	na	na	na	na	na	na	na	na	na	na	na	na	na	na	na	na	1417	1530	1432	802	1022	993	938	703	1764	1243	na	na	na	na	na	na	na	na	na	na	4776	5425	1586	1539	1764	1711	1446	2169	1757
M92H	na	na	na	na	na	na	na	na	na	na	na	na	na	na	na	na	na	na	na	na	223	329	280	184	242	260	217	296	756	446	na	na	na	na	na	na	na	na	na	na	630	578	298	309	380	412	362	666	554
M92I	na	na	na	na	na	na	na	na	na	na	na	na	na	na	na	na	na	na	na	na	259	251	256	131	148	257	263	323	785	576	na	na	na	na	na	na	na	na	na	na	562	504	262	328	411	479	435	853	841
M92K	na	na	na	na	na	na	na	na	na	na	na	na	na	na	na	na	na	na	na	na	710	566	394	207	188	148	48	16	124	136	na	na	na	na	na	na	na	na	na	na	2116	1801	325	284	213	249	127	130	150
M92L	na	na	na	na	na	na	na	na	na	na	na	na	na	na	na	na	na	na	na	na	813	1393	829	507	647	697	949	1003	2464	1510	na	na	na	na	na	na	na	na	na	na	2268	2570	765	986	1356	1408	1363	2418	2081
M92N	na	na	na	na	na	na	na	na	na	na	na	na	na	na	na	na	na	na	na	na	457	537	499	316	398	381	441	426	1131	797	na	na	na	na	na	na	na	na	na	na	1334	1334	555	650	843	751	777	1191	1207
M92P	na	na	na	na	na	na	na	na	na	na	na	na	na	na	na	na	na	na	na	na	558	465	353	163	159	193	113	55	266	275	na	na	na	na	na	na	na	na	na	na	1542	958	342	291	348	261	216	345	231
M92Q	na	na	na	na	na	na	na	na	na	na	na	na	na	na	na	na	na	na	na	na	452	631	522	352	543	399	396	477	1093	734	na	na	na	na	na	na	na	na	na	na	1141	1364	586	612	728	812	764	1290	906
M92R	na	na	na	na	na	na	na	na	na	na	na	na	na	na	na	na	na	na	na	na	1376	725	532	293	211	280	262	140	209	169	na	na	na	na	na	na	na	na	na	na	3765	1876	652	313	291	277	143	208	212
M92S	na	na	na	na	na	na	na	na	na	na	na	na	na	na	na	na	na	na	na	na	591	689	659	333	412	445	444	494	1434	931	na	na	na	na	na	na	na	na	na	na	1432	1662	640	629	791	828	876	1513	1252
M92T	na	na	na	na	na	na	na	na	na	na	na	na	na	na	na	na	na	na	na	na	267	497	310	247	185	314	426	417	1157	751	na	na	na	na	na	na	na	na	na	na	954	771	274	857	465	582	625	1076	895
M92V	na	na	na	na	na	na	na	na	na	na	na	na	na	na	na	na	na	na	na	na	573	729	699	357	545	435	561	522	1592	1019	na	na	na	na	na	na	na	na	na	na	1775	1549	542	648	1065	985	1068	1669	1510
M92W	na	na	na	na	na	na	na	na	na	na	na	na	na	na	na	na	na	na	na	na	398	631	529	324	480	415	479	461	1194	815	na	na	na	na	na	na	na	na	na	na	1343	1830	584	630	783	798	821	1268	999
M92Y	na	na	na	na	na	na	na	na	na	na	na	na	na	na	na	na	na	na	na	na	156	239	192	93	119	143	204	562	607	344	na	na	na	na	na	na	na	na	na	na	498	348	212	242	337	343	344	550	539
N147*	na	na	na	na	na	na	na	na	na	na	na	na	na	na	na	na	na	na	na	na	na	na	na	na	na	na	na	na	na	na	220	55	17	5	4	8	11	3	7	3	301	84	19	18	12	17	35	na	8
N147A	na	na	na	na	na	na	na	na	na	na	na	na	na	na	na	na	na	na	na	na	na	na	na	na	na	na	na	na	na	na	1108	1217	342	531	407	429	640	863	749	764	8	5	1003	1383	1491	1594	1513	2289	1932
N147C	na	na	na	na	na	na	na	na	na	na	na	na	na	na	na	na	na	na	na	na	na	na	na	na	na	na	na	na	na	na	252	305	70	59	69	53	94	70	100	68	611	576	165	200	230	274	201	277	150
N147D	na	na	na	na	na	na	na	na	na	na	na	na	na	na	na	na	na	na	na	na	na	na	na	na	na	na	na	na	na	na	375	341	68	42	45	39	20	69	28	23	837	667	204	157	120	115	109	32	na
N147E	na	na	na	na	na	na	na	na	na	na	na	na	na	na	na	na	na	na	na	na	na	na	na	na	na	na	na	na	na	na	889	929	326	366	347	250	421	377	395	384	2445	2215	776	975	934	997	914	1134	811
N147F	na	na	na	na	na	na	na	na	na	na	na	na	na	na	na	na	na	na	na	na	na	na	na	na	na	na	na	na	na	na	435	252	95	61	64	55	37	62	30	18	923	563	210	146	123	101	83	104	19
N147G	na	na	na	na	na	na	na	na	na	na	na	na	na	na	na	na	na	na	na	na	na	na	na	na	na	na	na	na	na	na	2671	2524	681	774	656	471	729	649	676	461	3	21	2133	1871	2197	3285	1635	1934	1153
N147H	na	na	na	na	na	na	na	na	na	na	na	na	na	na	na	na	na	na	na	na	na	na	na	na	na	na	na	na	na	na	409	393	145	144	113	170	169	186	136	146	1053	888	287	321	415	366	341	357	358
N147I	na	na	na	na	na	na	na	na	na	na	na	na	na	na	na	na	na	na	na	na	na	na	na	na	na	na	na	na	na	na	386	231	54	62	26	30	49	na	13	2	739	677	112	181	22	28	28	5	na
N147K	na	na	na	na	na	na	na	na	na	na	na	na	na	na	na	na	na	na	na	na	na	na	na	na	na	na	na	na	na	na	952	882	202	250	221	151	191	174	169	113	2338	1885	614	555	552	567	391	369	169
N147L	na	na	na	na	na	na	na	na	na	na	na	na	na	na	na	na	na	na	na	na	na	na	na	na	na	na	na	na	na	na	1349	1193	324	411	289	235	244	276	233	148	5	25	840	712	748	845	620	665	440
N147M	na	na	na	na	na	na	na	na	na	na	na	na	na	na	na	na	na	na	na	na	na	na	na	na	na	na	na	na	na	na	660	745	167	260	133	136	164	162	175	146	3	1503	535	526	529	491	467	414	426
N147P	na	na	na	na	na	na	na	na	na	na	na	na	na	na	na	na	na	na	na	na	na	na	na	na	na	na	na	na	na	na	1588	1309	392	429	378	231	276	170	278	129	3921	2731	1048	845	860	692	518	487	302
N147Q	na	na	na	na	na	na	na	na	na	na	na	na	na	na	na	na	na	na	na	na	na	na	na	na	na	na	na	na	na	na	445	400	148	147	145	124	176	208	198	231	1080	996	376	454	447	478	473	523	408
N147R	na	na	na	na	na	na	na	na	na	na	na	na	na	na	na	na	na	na	na	na	na	na	na	na	na	na	na	na	na	na	1933	1995	561	679	547	428	528	566	549	371	4888	4436	1531	1466	1734	1583	1309	1571	894
N147S	na	na	na	na	na	na	na	na	na	na	na	na	na	na	na	na	na	na	na	na	na	na	na	na	na	na	na	na	na	na	890	1161	250	289	303	246	374	419	454	425	2245	2304	670	892	912	997	943	1212	941
N147T	na	na	na	na	na	na	na	na	na	na	na	na	na	na	na	na	na	na	na	na	na	na	na	na	na	na	na	na	na	na	1180	1269	313	433	421	308	443	593	492	433	2894	3063	1003	1175	1280	1290	1179	1489	1020
N147V	na	na	na	na	na	na	na	na	na	na	na	na	na	na	na	na	na	na	na	na	na	na	na	na	na	na	na	na	na	na	1390	1085	335	430	345	244	331	297	289	256	3255	2893	923	873	956	960	852	924	505
N147W	na	na	na	na	na	na	na	na	na	na	na	na	na	na	na	na	na	na	na	na	na	na	na	na	na	na	na	na	na	na	448	470	113	109	122	70	95	52	80	34	1179	828	339	228	289	245	166	162	92
N147Y	na	na	na	na	na	na	na	na	na	na	na	na	na	na	na	na	na	na	na	na	na	na	na	na	na	na	na	na	na	na	282	239	38	23	29	18	6	53	na	na	676	454	67	77	25	na	na	na	na
N18*	134	59	16	7	27	27	1	7	4	na	149	43	10	4	2	11	2	na	na	8	194	26	13	5	5	6	na	na	10	5	na	na	na	na	na	na	na	na	na	na	na	na	na	na	na	na	na	na	na
N18A	550	878	312	186	174	205	113	456	103	169	330	551	145	88	137	103	124	337	196	326	490	1130	403	275	215	275	239	221	477	358	na	na	na	na	na	na	na	na	na	na	na	na	na	na	na	na	na	na	na
N18C	97	206	63	183	31	30	27	38	36	59	42	105	56	6	32	39	33	43	46	68	70	177	62	71	54	75	76	69	127	93	na	na	na	na	na	na	na	na	na	na	na	na	na	na	na	na	na	na	na
N18D	139	271	5	na	20	179	45	276	51	111	96	4	na	2	68	na	27	70	60	143	108	116	68	36	71	118	82	64	292	139	na	na	na	na	na	na	na	na	na	na	na	na	na	na	na	na	na	na	na
N18E	1106	1931	609	500	357	431	336	1102	272	528	449	1421	336	327	275	485	396	343	523	439	999	2291	981	535	544	743	498	534	1313	1062	na	na	na	na	na	na	na	na	na	na	na	na	na	na	na	na	na	na	na
N18F	212	362	92	49	107	187	90	189	112	124	175	171	73	43	61	124	65	77	131	169	180	285	188	79	76	115	76	167	326	211	na	na	na	na	na	na	na	na	na	na	na	na	na	na	na	na	na	na	na
N18G	11136	14964	4560	2851	2908	2527	2303	5091	1908	3410	5669	3	3159	2730	2648	3746	3639	2888	3633	4730	3	19	8050	4129	4303	5137	4248	3827	9298	6236	na	na	na	na	na	na	na	na	na	na	na	na	na	na	na	na	na	na	na
N18H	14	109	na	na	na	3	2	na	18	na	20	20	na	2	na	16	na	na	na	na	8	1	na	na	na	2	na	4	22	na	na	na	na	na	na	na	na	na	na	na	na	na	na	na	na	na	na	na	na
N18I	12	6	6	na	na	na	3	na	na	na	3	2	na	2	2	3	na	na	na	31	2	1	na	na	na	2	2	na	na	na	na	na	na	na	na	na	na	na	na	na	na	na	na	na	na	na	na	na	na
N18K	1389	877	125	117	114	239	104	209	94	200	273	4	623	54	89	44	92	40	165	113	2	2	338	184	327	303	237	147	476	298	na	na	na	na	na	na	na	na	na	na	na	na	na	na	na	na	na	na	na
N18L	1384	2322	683	709	469	383	615	1018	640	1111	712	2451	393	336	527	761	593	1292	864	919	1255	2183	1109	649	678	927	1004	927	2640	1546	na	na	na	na	na	na	na	na	na	na	na	na	na	na	na	na	na	na	na
N18M	1470	2105	675	382	340	406	451	651	301	609	605	1	275	285	463	704	465	389	556	733	1330	2147	1025	588	735	668	654	705	1391	995	na	na	na	na	na	na	na	na	na	na	na	na	na	na	na	na	na	na	na
N18P	57	39	14	9	8	na	3	na	na	3	53	54	17	8	na	17	2	2	2	11	82	17	6	6	na	5	3	na	na	na	na	na	na	na	na	na	na	na	na	na	na	na	na	na	na	na	na	na	na
N18Q	209	838	74	61	72	61	114	234	126	247	98	196	32	47	43	67	121	231	125	261	175	280	142	107	155	139	129	164	392	241	na	na	na	na	na	na	na	na	na	na	na	na	na	na	na	na	na	na	na
N18R	2817	4856	1443	1399	1161	1013	822	1485	591	1172	1126	2753	839	598	892	3020	1409	723	1063	1237	2611	3188	2169	1195	1244	1490	1297	1924	2746	2149	na	na	na	na	na	na	na	na	na	na	na	na	na	na	na	na	na	na	na
N18S	555	895	236	147	180	198	178	171	120	210	206	3	84	111	214	139	144	212	435	139	421	2	262	217	140	283	244	265	463	325	na	na	na	na	na	na	na	na	na	na	na	na	na	na	na	na	na	na	na
N18T	189	373	124	103	52	73	117	185	109	143	106	6	109	115	86	146	117	169	120	110	6	7	176	104	185	127	147	145	369	279	na	na	na	na	na	na	na	na	na	na	na	na	na	na	na	na	na	na	na
N18V	2485	4233	1293	622	541	361	376	600	261	382	1137	2584	665	487	914	651	592	659	460	488	1	3607	1886	999	819	1064	637	659	1148	834	na	na	na	na	na	na	na	na	na	na	na	na	na	na	na	na	na	na	na
N18W	1113	1684	601	322	417	242	292	672	223	435	399	1290	236	347	326	917	439	267	441	389	943	1399	889	457	533	562	491	408	1091	782	na	na	na	na	na	na	na	na	na	na	na	na	na	na	na	na	na	na	na
N18Y	na	na	na	na	na	na	1	na	na	6	1	1	na	2	1	na	na	na	na	na	na	1	na	na	na	na	na	na	na	na	na	na	na	na	na	na	na	na	na	na	na	na	na	na	na	na	na	na	na
N23*	49	18	4	4	na	na	na	na	na	na	46	12	2	2	1	na	na	7	2	na	63	4	6	2	2	2	na	na	na	na	na	na	na	na	na	na	na	na	na	na	na	na	na	na	na	na	na	na	na
N23A	297	418	144	96	141	109	114	235	101	217	132	269	43	46	90	324	108	78	151	150	221	288	183	102	121	141	208	160	494	281	na	na	na	na	na	na	na	na	na	na	na	na	na	na	na	na	na	na	na
N23C	126	206	55	41	50	103	34	115	50	84	79	137	52	58	42	782	52	27	56	62	1	200	85	55	79	85	74	36	172	125	na	na	na	na	na	na	na	na	na	na	na	na	na	na	na	na	na	na	na
N23D	3	na	4	na	4	4	4	2	na	3	1	1	na	5	5	na	na	3	na	na	1	2	na	na	2	na	4	na	na	na	na	na	na	na	na	na	na	na	na	na	na	na	na	na	na	na	na	na	na
N23E	338	526	135	126	146	130	84	210	87	149	190	390	87	151	143	192	120	132	158	244	320	270	234	131	190	162	198	124	376	204	na	na	na	na	na	na	na	na	na	na	na	na	na	na	na	na	na	na	na
N23F	552	686	217	85	103	126	95	82	58	79	232	386	74	90	106	268	171	130	115	147	2	564	218	195	120	166	152	68	277	156	na	na	na	na	na	na	na	na	na	na	na	na	na	na	na	na	na	na	na
N23G	607	797	277	209	250	138	233	461	253	457	325	1	104	167	271	294	263	344	311	451	2	599	495	299	318	347	352	350	873	635	na	na	na	na	na	na	na	na	na	na	na	na	na	na	na	na	na	na	na
N23H	307	369	162	78	113	63	121	129	81	99	182	289	43	67	73	193	108	39	102	203	260	209	163	106	84	107	119	78	314	175	na	na	na	na	na	na	na	na	na	na	na	na	na	na	na	na	na	na	na
N23I	62	225	na	na	na	na	3	4	na	na	2	87	na	54	6	55	2	na	na	na	3	4	25	na	120	38	6	na	na	na	na	na	na	na	na	na	na	na	na	na	na	na	na	na	na	na	na	na	na
N23K	544	753	161	na	43	170	7	46	23	121	205	643	251	37	103	434	51	4	58	2	1	1	238	195	52	196	80	46	102	783	na	na	na	na	na	na	na	na	na	na	na	na	na	na	na	na	na	na	na
N23L	1052	1419	337	269	207	199	202	371	203	230	572	933	163	744	254	583	271	213	319	466	874	1	679	331	347	420	303	365	851	581	na	na	na	na	na	na	na	na	na	na	na	na	na	na	na	na	na	na	na
N23M	272	495	159	71	82	243	102	324	70	207	124	1	131	91	73	102	88	203	149	221	287	422	227	123	251	153	198	143	411	259	na	na	na	na	na	na	na	na	na	na	na	na	na	na	na	na	na	na	na
N23P	833	1112	392	183	163	169	126	225	141	233	363	814	176	130	172	308	221	107	226	255	698	709	487	216	196	264	221	204	554	406	na	na	na	na	na	na	na	na	na	na	na	na	na	na	na	na	na	na	na
N23Q	186	384	79	81	102	69	53	253	55	71	41	256	54	23	56	199	63	70	106	214	158	266	158	98	129	108	136	92	278	169	na	na	na	na	na	na	na	na	na	na	na	na	na	na	na	na	na	na	na
N23R	887	1205	373	149	324	198	214	548	164	292	323	845	209	208	239	382	232	371	300	286	649	1065	514	290	292	447	331	309	750	495	na	na	na	na	na	na	na	na	na	na	na	na	na	na	na	na	na	na	na
N23S	377	619	165	68	30	38	73	92	23	50	175	2	98	77	151	10	63	41	88	147	6	2	174	144	174	126	95	76	184	234	na	na	na	na	na	na	na	na	na	na	na	na	na	na	na	na	na	na	na
N23T	262	356	93	66	64	49	58	143	68	123	169	178	54	35	112	135	69	92	77	245	154	136	109	60	72	117	106	90	287	195	na	na	na	na	na	na	na	na	na	na	na	na	na	na	na	na	na	na	na
N23V	501	697	241	123	119	93	108	235	114	244	268	448	111	80	134	799	155	147	208	281	467	2	312	250	240	235	197	239	624	321	na	na	na	na	na	na	na	na	na	na	na	na	na	na	na	na	na	na	na
N23W	273	326	99	53	48	36	60	58	38	68	19	233	168	52	37	55	57	29	77	32	232	407	121	99	82	73	93	85	135	148	na	na	na	na	na	na	na	na	na	na	na	na	na	na	na	na	na	na	na
N23Y	53	167	na	na	na	na	4	2	na	na	85	2	na	5	5	na	na	na	na	na	6	5	na	10	7	na	2	na	na	na	na	na	na	na	na	na	na	na	na	na	na	na	na	na	na	na	na	na	na
N34*	142	39	7	5	8	na	4	2	2	na	128	31	17	5	na	na	3	2	na	na	176	17	8	5	na	na	2	na	na	7	na	na	na	na	na	na	na	na	na	na	na	na	na	na	na	na	na	na	na
N34A	1092	1482	550	261	243	327	235	441	239	368	442	963	297	302	363	437	267	282	376	294	2	2	782	422	366	531	462	381	879	565	na	na	na	na	na	na	na	na	na	na	na	na	na	na	na	na	na	na	na
N34C	341	547	159	138	140	21	115	207	73	244	154	382	108	265	76	135	115	116	116	95	303	363	204	101	161	145	138	137	365	248	na	na	na	na	na	na	na	na	na	na	na	na	na	na	na	na	na	na	na
N34D	178	269	na	na	na	3	5	4	na	na	30	3	na	17	67	na	na	2	3	7	5	3	na	na	na	3	2	na	4	na	na	na	na	na	na	na	na	na	na	na	na	na	na	na	na	na	na	na	na
N34E	1195	1776	594	343	407	398	433	758	369	702	772	1163	312	465	312	644	548	316	506	612	1119	1638	963	548	647	639	514	626	1329	929	na	na	na	na	na	na	na	na	na	na	na	na	na	na	na	na	na	na	na
N34F	644	856	409	694	131	153	167	208	88	167	290	582	214	304	169	122	152	113	362	174	578	672	463	269	253	295	235	221	483	410	na	na	na	na	na	na	na	na	na	na	na	na	na	na	na	na	na	na	na
N34G	6010	9442	2737	1913	2532	2612	2516	4694	2833	4675	2546	5750	2524	2007	1925	2431	2770	2663	3494	4627	3	1	4886	2567	2856	3433	3787	3425	9407	6354	na	na	na	na	na	na	na	na	na	na	na	na	na	na	na	na	na	na	na
N34H	159	240	76	35	38	60	73	166	74	58	88	153	61	52	42	205	55	35	74	28	162	154	62	76	75	77	57	88	220	125	na	na	na	na	na	na	na	na	na	na	na	na	na	na	na	na	na	na	na
N34I	148	133	5	na	15	na	3	1086	na	na	118	1	na	4	3	2	27	na	na	na	1	2	na	15	3	6	na	2	na	na	na	na	na	na	na	na	na	na	na	na	na	na	na	na	na	na	na	na	na
N34K	570	716	275	121	144	205	162	447	176	341	301	4	569	226	216	78	168	355	218	209	3	2	338	207	147	199	272	377	631	422	na	na	na	na	na	na	na	na	na	na	na	na	na	na	na	na	na	na	na
N34L	1828	3012	868	529	558	733	488	911	435	673	682	1713	505	602	506	545	684	491	948	873	1654	2625	1378	795	702	847	835	703	1844	1247	na	na	na	na	na	na	na	na	na	na	na	na	na	na	na	na	na	na	na
N34M	633	754	244	214	136	169	103	302	150	210	407	574	347	115	824	244	206	209	176	266	1	1036	443	277	298	259	268	184	452	307	na	na	na	na	na	na	na	na	na	na	na	na	na	na	na	na	na	na	na
N34P	216	37	9	13	10	na	4	na	na	10	143	53	23	13	4	28	na	na	na	na	204	35	5	10	5	3	na	na	na	na	na	na	na	na	na	na	na	na	na	na	na	na	na	na	na	na	na	na	na
N34Q	500	712	215	172	184	192	198	481	345	414	264	448	122	180	156	384	205	192	370	579	1	625	509	237	247	262	282	241	779	572	na	na	na	na	na	na	na	na	na	na	na	na	na	na	na	na	na	na	na
N34R	2318	4013	1096	778	775	878	737	1542	810	1239	1144	2564	1030	653	642	1010	1190	679	1145	2193	1	2803	1641	934	1273	1202	1324	1066	2693	1906	na	na	na	na	na	na	na	na	na	na	na	na	na	na	na	na	na	na	na
N34S	915	1243	351	288	302	350	279	678	186	375	305	2	241	180	265	224	299	251	376	567	2	1	655	320	357	482	389	405	889	785	na	na	na	na	na	na	na	na	na	na	na	na	na	na	na	na	na	na	na
N34T	561	841	211	120	173	106	102	275	70	57	181	1	103	133	180	495	134	66	132	200	484	1	369	206	229	238	129	325	408	317	na	na	na	na	na	na	na	na	na	na	na	na	na	na	na	na	na	na	na
N34V	2104	2764	1185	719	600	647	473	1058	525	822	728	1774	572	577	575	845	625	730	887	757	2	2778	1770	876	1270	1141	997	838	1993	1425	na	na	na	na	na	na	na	na	na	na	na	na	na	na	na	na	na	na	na
N34W	951	1551	491	285	386	358	306	309	262	399	509	950	204	740	246	536	249	384	348	799	2	2	734	388	409	474	455	434	1067	603	na	na	na	na	na	na	na	na	na	na	na	na	na	na	na	na	na	na	na
N34Y	282	260	29	43	57	68	15	9	2	2	131	6	168	42	47	67	28	17	26	74	3	1	171	67	66	65	87	26	168	124	na	na	na	na	na	na	na	na	na	na	na	na	na	na	na	na	na	na	na
N37*	132	46	21	2	9	na	2	na	na	11	107	72	20	na	6	5	4	2	6	14	154	9	10	4	7	4	na	na	7	4	na	na	na	na	na	na	na	na	na	na	na	na	na	na	na	na	na	na	na
N37A	1273	1980	688	446	514	626	406	822	309	535	563	1075	348	427	358	605	674	599	574	1003	1	1692	938	549	518	671	522	502	1167	793	na	na	na	na	na	na	na	na	na	na	na	na	na	na	na	na	na	na	na
N37C	549	773	271	146	310	62	130	202	73	138	249	581	247	113	135	206	423	117	192	167	411	669	465	214	218	246	192	140	512	218	na	na	na	na	na	na	na	na	na	na	na	na	na	na	na	na	na	na	na
N37D	618	1006	316	224	154	238	183	353	188	247	304	3	242	226	217	197	247	448	301	241	3	3	513	212	188	421	281	245	798	496	na	na	na	na	na	na	na	na	na	na	na	na	na	na	na	na	na	na	na
N37E	875	1482	527	353	349	394	353	832	412	719	524	4	456	376	348	613	453	478	653	648	697	996	720	409	415	561	631	517	1448	1131	na	na	na	na	na	na	na	na	na	na	na	na	na	na	na	na	na	na	na
N37F	813	1136	407	437	389	298	334	423	331	545	538	750	367	285	447	1629	407	337	460	513	648	2	670	412	403	490	503	602	1252	972	na	na	na	na	na	na	na	na	na	na	na	na	na	na	na	na	na	na	na
N37G	3793	5161	2002	2347	1498	1319	1206	1971	1122	1655	1513	3634	1605	1230	1229	7511	1596	1557	1791	1785	3	4857	3171	1556	1835	1897	1789	1571	3957	2772	na	na	na	na	na	na	na	na	na	na	na	na	na	na	na	na	na	na	na
N37H	839	1159	603	330	230	282	202	492	238	372	362	783	216	338	192	401	311	245	350	360	562	1	591	293	455	369	346	298	960	521	na	na	na	na	na	na	na	na	na	na	na	na	na	na	na	na	na	na	na
N37I	500	562	286	165	241	84	110	168	106	142	271	403	151	162	120	176	119	173	178	115	1	1	292	184	160	266	167	180	432	297	na	na	na	na	na	na	na	na	na	na	na	na	na	na	na	na	na	na	na
N37K	1147	1592	522	454	554	463	562	629	568	845	408	1	503	291	374	802	552	450	690	919	4	4	944	491	494	708	741	672	1886	1155	na	na	na	na	na	na	na	na	na	na	na	na	na	na	na	na	na	na	na
N37L	2210	3308	1432	792	970	709	751	1895	828	1219	907	2	693	857	828	1178	988	730	1150	1121	1762	2	1789	1005	1033	1233	1317	960	2969	2155	na	na	na	na	na	na	na	na	na	na	na	na	na	na	na	na	na	na	na
N37M	580	1411	264	202	401	399	215	469	249	403	315	585	1137	117	204	451	273	197	347	361	449	592	518	257	312	327	408	488	931	709	na	na	na	na	na	na	na	na	na	na	na	na	na	na	na	na	na	na	na
N37P	1877	2710	1003	644	537	384	419	795	281	485	1030	1876	764	643	666	879	504	666	533	360	1301	2043	1459	751	737	821	581	495	1186	897	na	na	na	na	na	na	na	na	na	na	na	na	na	na	na	na	na	na	na
N37Q	532	902	360	246	262	298	230	460	239	328	280	758	307	218	573	667	403	180	386	502	1	593	475	246	353	296	337	281	867	551	na	na	na	na	na	na	na	na	na	na	na	na	na	na	na	na	na	na	na
N37R	2441	4169	1194	855	900	808	757	1373	874	1333	1281	2329	859	1222	724	941	1067	1102	1230	1460	1801	2312	2120	989	995	1301	1228	1242	3017	2011	na	na	na	na	na	na	na	na	na	na	na	na	na	na	na	na	na	na	na
N37S	1633	2214	1034	516	633	491	519	1514	516	815	659	3	419	717	1339	1235	607	497	696	763	1	1	1091	614	533	847	710	741	1837	1163	na	na	na	na	na	na	na	na	na	na	na	na	na	na	na	na	na	na	na
N37T	1091	1583	608	407	615	354	373	685	275	446	515	1174	984	452	344	1206	467	375	522	680	707	1	846	423	506	545	490	427	1376	893	na	na	na	na	na	na	na	na	na	na	na	na	na	na	na	na	na	na	na
N37V	1618	2341	967	634	740	802	737	1672	707	1121	643	1457	955	643	530	971	1221	759	936	1257	1288	1711	1277	705	859	935	1024	805	2305	1647	na	na	na	na	na	na	na	na	na	na	na	na	na	na	na	na	na	na	na
N37W	1294	2041	633	472	541	569	482	652	350	674	546	1	289	327	384	739	630	886	572	789	946	1650	931	563	548	712	736	886	1692	1080	na	na	na	na	na	na	na	na	na	na	na	na	na	na	na	na	na	na	na
N37Y	441	737	255	178	248	167	177	355	212	265	147	7	156	142	204	148	174	158	274	330	350	2	315	215	206	294	300	277	715	527	na	na	na	na	na	na	na	na	na	na	na	na	na	na	na	na	na	na	na
N59*	122	11	10	na	na	na	na	na	na	na	156	9	13	13	6	28	5	na	4	3	na	na	na	na	na	na	na	na	na	na	83	38	4	5	2	4	na	2	4	6	na	na	na	na	na	na	na	na	na
N59A	869	1201	488	430	293	302	415	681	473	713	667	526	256	305	409	447	358	371	611	502	na	na	na	na	na	na	na	na	na	na	666	930	235	208	262	167	345	276	322	371	na	na	na	na	na	na	na	na	na
N59C	485	546	277	159	123	201	161	383	186	234	196	236	66	108	105	130	154	300	195	228	na	na	na	na	na	na	na	na	na	na	327	496	91	114	122	92	135	111	193	154	na	na	na	na	na	na	na	na	na
N59D	435	415	140	104	93	79	105	281	126	159	4	297	180	68	122	847	108	86	152	239	na	na	na	na	na	na	na	na	na	na	264	309	57	75	46	43	55	120	76	55	na	na	na	na	na	na	na	na	na
N59E	2	1158	539	598	404	289	274	718	292	450	655	723	217	224	274	629	505	452	598	640	na	na	na	na	na	na	na	na	na	na	834	1294	241	324	282	246	332	316	375	344	na	na	na	na	na	na	na	na	na
N59F	229	603	256	117	216	180	149	201	124	182	154	253	247	143	153	75	139	705	167	121	na	na	na	na	na	na	na	na	na	na	347	639	107	117	95	103	133	119	125	113	na	na	na	na	na	na	na	na	na
N59G	3872	6014	2683	1737	2059	1932	1790	3494	2358	3467	1990	3015	1430	1417	1669	2980	2378	2273	2976	2806	na	na	na	na	na	na	na	na	na	na	4399	7184	1363	1813	1409	1359	1935	2230	2347	2244	na	na	na	na	na	na	na	na	na
N59H	199	309	135	94	185	113	136	77	138	204	173	166	72	51	72	167	117	132	103	257	na	na	na	na	na	na	na	na	na	na	188	244	39	67	48	48	83	77	72	50	na	na	na	na	na	na	na	na	na
N59I	304	2	141	123	133	218	151	242	229	248	4	268	89	48	72	95	136	102	206	238	na	na	na	na	na	na	na	na	na	na	259	305	62	79	80	81	120	133	139	149	na	na	na	na	na	na	na	na	na
N59K	931	1362	560	418	334	362	246	580	345	601	2	780	283	360	262	518	468	320	602	505	na	na	na	na	na	na	na	na	na	na	1084	1177	182	297	223	197	260	298	333	295	na	na	na	na	na	na	na	na	na
N59L	953	1363	818	470	491	309	371	594	243	364	464	761	240	455	363	411	295	318	379	418	na	na	na	na	na	na	na	na	na	na	862	1332	255	307	297	232	243	302	246	207	na	na	na	na	na	na	na	na	na
N59M	513	795	328	257	341	185	161	438	114	250	432	404	157	306	235	644	186	368	285	165	na	na	na	na	na	na	na	na	na	na	465	750	143	151	165	109	189	222	191	134	na	na	na	na	na	na	na	na	na
N59P	420	454	355	182	271	253	130	187	208	402	117	263	171	221	103	96	188	196	273	416	na	na	na	na	na	na	na	na	na	na	279	390	66	66	86	80	113	115	117	115	na	na	na	na	na	na	na	na	na
[truncated: 1,168 more rows]
[truncated: 11 more columns]
