# Supplementary material for: Altered expression of a quality control protease in E. coli reshapes the in vivo mutational landscape of a model enzyme
Source: eLife. 2020 Jul 23;9:e53476. doi: 10.7554/eLife.53476 (PMC7377907; doi:10.7554/eLife.53476)
Supplement: Supplementary file 5. — Counts are recorded as in Supplementary file 4. [file elife-53476-supp5.csv]

#Mutant	Repeat1_library_transformation	Repeat1_outgrowth	Repeat1_t_00hrs	Repeat1_t_02hrs	Repeat1_t_04hrs	Repeat1_t_06hrs	Repeat1_t_08hrs	Repeat1_t_12hrs	Repeat1_t_16hrs	Repeat1_t_18hrs	Repeat2_library_transformation	Repeat2_outgrowth	Repeat2_t_00hrs	Repeat2_t_02hrs	Repeat2_t_04hrs	Repeat2_t_06hrs	Repeat2_t_08hrs	Repeat2_t_12hrs	Repeat2_t_16hrs	Repeat2_t_18hrs	Repeat3_library_transformation	Repeat3_outgrowth	Repeat3_t_00hrs	Repeat3_t_02hrs	Repeat3_t_04hrs	Repeat3_t_06hrs	Repeat3_t_08hrs	Repeat3_t_12hrs	Repeat3_t_16hrs	Repeat3_t_18hrs	Repeat4_library_transformation	Repeat4_outgrowth	Repeat4_t_00hrs	Repeat4_t_02hrs	Repeat4_t_04hrs	Repeat4_t_06hrs	Repeat4_t_08hrs	Repeat4_t_12hrs	Repeat4_t_16hrs	Repeat4_t_18hrs	Repeat5_library_transformation	Repeat5_outgrowth	Repeat5_t_00hrs	Repeat5_t_02hrs	Repeat5_t_04hrs	Repeat5_t_06hrs	Repeat5_t_08hrs	Repeat5_t_12hrs	Repeat5_t_16hrs
A107*	42	na	na	na	na	na	na	na	na	na	na	na	na	na	na	na	na	na	na	na	na	na	na	na	na	na	na	na	na	na	na	na	na	na	na	na	na	na	na	na	na	na	na	na	na	na	na	na	na
A107C	89	81	na	68	51	41	41	68	35	508	na	na	na	na	na	na	na	na	na	na	na	na	na	na	na	na	na	na	na	na	150	64	29	34	160	32	45	45	40	35	na	na	na	na	na	na	na	na	na
A107E	na	na	na	na	na	na	na	na	na	na	na	na	na	na	na	na	na	na	na	na	na	na	na	na	na	na	na	na	na	na	na	na	na	na	5	na	na	na	na	na	na	na	na	na	na	na	na	na	na
A107F	41	na	na	na	na	19	na	na	na	na	na	na	na	na	na	na	na	na	na	na	na	na	na	na	na	na	na	na	na	na	37	na	na	na	na	na	na	na	na	na	na	na	na	na	na	na	na	na	na
A107G	6	na	na	na	na	na	na	na	na	461	na	na	na	na	na	na	na	na	na	na	na	na	na	na	na	na	na	na	na	na	9	6	na	na	na	na	na	na	na	na	na	na	na	na	na	na	na	na	na
A107H	8	na	na	na	na	na	na	na	na	na	na	na	na	na	na	na	na	na	na	na	na	na	na	na	na	na	na	na	na	na	na	na	na	na	na	na	na	na	na	na	na	na	na	na	na	na	na	na	na
A107I	189	233	na	104	114	83	120	106	134	860	na	na	na	na	na	na	na	na	na	na	na	na	na	na	na	na	na	na	na	na	443	357	87	103	82	93	123	124	95	85	na	na	na	na	na	na	na	na	na
A107K	145	na	na	na	na	na	na	na	na	na	na	na	na	na	na	na	na	na	na	na	na	na	na	na	na	na	na	na	na	na	na	na	na	na	na	na	na	na	na	na	na	na	na	na	na	na	na	na	na
A107L	300	132	na	32	51	21	29	na	na	115	na	na	na	na	na	na	na	na	na	na	na	na	na	na	na	na	na	na	na	na	343	157	23	25	na	7	6	na	na	na	na	na	na	na	na	na	na	na	na
A107M	389	129	na	79	44	na	na	na	na	na	na	na	na	na	na	na	na	na	na	na	na	na	na	na	na	na	na	na	na	na	397	34	18	13	11	na	na	na	na	na	na	na	na	na	na	na	na	na	na
A107N	65	27	na	na	na	na	na	na	na	na	na	na	na	na	na	na	na	na	na	na	na	na	na	na	na	na	na	na	na	na	64	na	na	na	na	na	na	na	na	na	na	na	na	na	na	na	na	na	na
A107P	na	na	na	na	na	na	na	na	na	na	na	na	na	na	na	na	na	na	na	na	na	na	na	na	na	na	na	na	na	na	na	na	na	na	na	na	na	na	na	na	na	na	na	na	na	na	na	na	na
A107R	139	na	na	na	na	na	na	na	na	na	na	na	na	na	na	na	na	na	na	na	na	na	na	na	na	na	na	na	na	na	na	na	na	na	na	na	na	na	na	na	na	na	na	na	na	na	na	na	na
A107S	267	347	na	187	206	138	141	260	178	1259	na	na	na	na	na	na	na	na	na	na	na	na	na	na	na	na	na	na	na	na	657	557	211	118	110	116	126	155	153	130	na	na	na	na	na	na	na	na	na
A107T	na	na	na	na	na	na	na	na	na	na	na	na	na	na	na	na	na	na	na	na	na	na	na	na	na	na	na	na	na	na	na	na	na	na	na	na	na	11	na	na	na	na	na	na	na	na	na	na	na
A107V	282	805	11	141	144	167	113	183	144	1551	na	na	na	na	na	na	na	na	na	na	na	na	na	na	na	na	na	na	na	na	720	750	25	29	na	na	53	26	na	45	na	na	na	na	na	na	na	na	na
A107W	39	na	na	na	na	na	na	na	na	na	na	na	na	na	na	na	na	na	na	na	na	na	na	na	na	na	na	na	na	na	19	na	na	na	na	na	na	na	na	na	na	na	na	na	na	na	na	na	na
A107Y	105	na	na	na	na	na	na	na	na	na	na	na	na	na	na	na	na	na	na	na	na	na	na	na	na	na	na	na	na	na	34	na	na	na	na	na	na	na	na	na	na	na	na	na	na	na	na	na	na
A117*	388	77	na	12	15	24	6	6	na	66	na	na	na	na	na	na	na	na	na	na	na	na	na	na	na	na	na	na	na	na	200	37	6	na	18	28	18	13	7	6	na	na	na	na	na	na	na	na	na
A117C	165	204	na	87	152	162	136	41	82	785	na	na	na	na	na	na	na	na	na	na	na	na	na	na	na	na	na	na	na	na	400	275	81	91	92	96	113	111	75	107	na	na	na	na	na	na	na	na	na
A117D	130	259	na	na	na	63	93	na	64	165	na	na	na	na	na	na	na	na	na	na	na	na	na	na	na	na	na	na	na	na	487	265	na	na	na	na	na	na	na	na	na	na	na	na	na	na	na	na	na
A117E	1622	2269	na	1016	1228	1589	1049	1442	885	8643	na	na	na	na	na	na	na	na	na	na	na	na	na	na	na	na	na	na	na	na	4075	3381	1002	927	1330	1168	1260	1501	1106	1223	na	na	na	na	na	na	na	na	na
A117F	656	1288	na	373	414	174	146	162	92	858	na	na	na	na	na	na	na	na	na	na	na	na	na	na	na	na	na	na	na	na	1847	1480	425	371	333	422	458	352	272	168	na	na	na	na	na	na	na	na	na
A117G	7422	9625	na	3910	4663	4685	4359	4395	4026	27826	na	na	na	na	na	na	na	na	na	na	na	na	na	na	na	na	na	na	na	na	17258	14663	3749	3581	3401	3954	4640	4850	4372	4640	na	na	na	na	na	na	na	na	na
A117H	588	833	na	420	467	377	528	353	275	2590	na	na	na	na	na	na	na	na	na	na	na	na	na	na	na	na	na	na	na	na	1796	1479	413	355	304	438	536	522	422	405	na	na	na	na	na	na	na	na	na
A117I	365	594	na	343	446	293	397	479	393	3901	na	na	na	na	na	na	na	na	na	na	na	na	na	na	na	na	na	na	na	na	1365	1035	453	368	471	514	532	579	541	550	na	na	na	na	na	na	na	na	na
A117K	3013	4423	na	1872	2206	1815	1737	1410	1144	10614	na	na	na	na	na	na	na	na	na	na	na	na	na	na	na	na	na	na	na	na	8121	10	2362	2073	2332	2497	2628	2486	2058	1962	na	na	na	na	na	na	na	na	na
A117L	3956	4763	na	1787	2171	1997	1468	1192	988	6805	na	na	na	na	na	na	na	na	na	na	na	na	na	na	na	na	na	na	na	na	8205	6240	2003	1934	1708	2336	2323	2321	1626	1543	na	na	na	na	na	na	na	na	na
A117M	986	1236	na	519	620	633	853	626	487	4319	na	na	na	na	na	na	na	na	na	na	na	na	na	na	na	na	na	na	na	na	2191	2507	607	588	645	803	828	847	761	730	na	na	na	na	na	na	na	na	na
A117N	1229	1859	na	746	896	515	740	667	570	4591	na	na	na	na	na	na	na	na	na	na	na	na	na	na	na	na	na	na	na	na	3225	2737	872	808	853	1062	1004	1201	838	812	na	na	na	na	na	na	na	na	na
A117P	338	5	na	na	na	na	na	na	na	na	na	na	na	na	na	na	na	na	na	na	na	na	na	na	na	na	na	na	na	na	165	8	na	na	na	na	na	na	na	na	na	na	na	na	na	na	na	na	na
A117Q	759	995	na	370	512	493	558	426	356	4398	na	na	na	na	na	na	na	na	na	na	na	na	na	na	na	na	na	na	na	na	1602	1246	462	369	477	620	569	781	643	625	na	na	na	na	na	na	na	na	na
A117R	2181	3238	na	1435	1631	2018	1897	1268	1399	11541	na	na	na	na	na	na	na	na	na	na	na	na	na	na	na	na	na	na	na	na	6393	5022	1538	1623	2137	2014	2089	2429	2145	2132	na	na	na	na	na	na	na	na	na
A117S	1038	1485	na	453	587	1275	764	488	461	4079	na	na	na	na	na	na	na	na	na	na	na	na	na	na	na	na	na	na	na	na	2695	2647	297	478	334	355	465	570	436	531	na	na	na	na	na	na	na	na	na
A117T	1739	2630	na	773	917	1017	763	1440	439	5282	na	na	na	na	na	na	na	na	na	na	na	na	na	na	na	na	na	na	na	na	3678	2588	752	661	611	718	805	752	644	646	na	na	na	na	na	na	na	na	na
A117V	2578	3756	na	1536	2047	2082	1905	1847	1939	14316	na	na	na	na	na	na	na	na	na	na	na	na	na	na	na	na	na	na	na	na	6166	5896	1727	1771	1759	2185	2281	2598	2318	2444	na	na	na	na	na	na	na	na	na
A117W	1136	1664	na	521	549	459	287	183	266	1401	na	na	na	na	na	na	na	na	na	na	na	na	na	na	na	na	na	na	na	na	2665	1965	524	531	437	681	654	534	312	321	na	na	na	na	na	na	na	na	na
A117Y	228	422	na	208	176	141	18	103	55	457	na	na	na	na	na	na	na	na	na	na	na	na	na	na	na	na	na	na	na	na	782	1035	131	130	178	193	183	174	117	77	na	na	na	na	na	na	na	na	na
A143*	na	na	na	na	na	na	na	na	na	na	330	42	28	13	1	na	na	10	20	15	na	na	na	na	na	na	na	na	na	na	282	51	21	11	na	13	6	10	na	9	na	na	na	na	na	na	na	na	na
A143C	na	na	na	na	na	na	na	na	na	na	295	252	144	83	12	135	117	92	29	93	na	na	na	na	na	na	na	na	na	na	278	341	81	68	80	111	122	140	107	81	na	na	na	na	na	na	na	na	na
A143D	na	na	na	na	na	na	na	na	na	na	1	630	441	265	39	230	194	313	300	412	na	na	na	na	na	na	na	na	na	na	759	1026	201	196	223	347	318	361	281	277	na	na	na	na	na	na	na	na	na
A143E	na	na	na	na	na	na	na	na	na	na	2083	2017	1025	522	72	543	570	864	743	968	na	na	na	na	na	na	na	na	na	na	2083	2772	522	592	594	762	933	924	696	761	na	na	na	na	na	na	na	na	na
A143F	na	na	na	na	na	na	na	na	na	na	2518	2146	1236	550	63	716	678	800	1037	1026	na	na	na	na	na	na	na	na	na	na	2425	3133	701	603	922	943	1109	930	870	879	na	na	na	na	na	na	na	na	na
A143G	na	na	na	na	na	na	na	na	na	na	1	6254	3681	2044	226	2081	2411	2561	2822	2938	na	na	na	na	na	na	na	na	na	na	20	10016	2201	1948	2465	3112	3185	3285	2746	2709	na	na	na	na	na	na	na	na	na
A143H	na	na	na	na	na	na	na	na	na	na	1556	1188	687	287	37	349	499	635	373	731	na	na	na	na	na	na	na	na	na	na	1406	1999	429	415	733	623	625	736	616	574	na	na	na	na	na	na	na	na	na
A143I	na	na	na	na	na	na	na	na	na	na	1304	847	641	225	61	379	341	471	526	490	na	na	na	na	na	na	na	na	na	na	1213	1583	365	339	427	466	575	491	443	469	na	na	na	na	na	na	na	na	na
A143K	na	na	na	na	na	na	na	na	na	na	4730	4036	2216	1105	160	1146	1453	1482	1868	2073	na	na	na	na	na	na	na	na	na	na	17	6244	1331	1417	1455	2062	2199	2108	2010	1875	na	na	na	na	na	na	na	na	na
A143L	na	na	na	na	na	na	na	na	na	na	1	6478	4008	1476	270	2198	2650	2910	3170	3471	na	na	na	na	na	na	na	na	na	na	25	10645	2341	2208	3132	3375	3541	3734	3190	3050	na	na	na	na	na	na	na	na	na
A143M	na	na	na	na	na	na	na	na	na	na	2281	1817	1138	507	73	596	1066	725	955	938	na	na	na	na	na	na	na	na	na	na	2000	2774	601	708	646	961	938	952	862	875	na	na	na	na	na	na	na	na	na
A143N	na	na	na	na	na	na	na	na	na	na	3275	2926	1523	761	102	792	1326	1058	878	1247	na	na	na	na	na	na	na	na	na	na	8	4335	943	750	1134	1232	1358	1400	1092	1190	na	na	na	na	na	na	na	na	na
A143P	na	na	na	na	na	na	na	na	na	na	2	8315	5472	2383	332	2468	2950	3023	3014	3765	na	na	na	na	na	na	na	na	na	na	46	14390	3386	3352	3748	4265	4591	4169	3474	3282	na	na	na	na	na	na	na	na	na
A143Q	na	na	na	na	na	na	na	na	na	na	1377	1203	635	303	36	363	476	445	396	556	na	na	na	na	na	na	na	na	na	na	1326	1745	360	569	391	538	608	570	492	550	na	na	na	na	na	na	na	na	na
A143R	na	na	na	na	na	na	na	na	na	na	3910	3152	1903	835	147	1184	1095	1236	1435	1728	na	na	na	na	na	na	na	na	na	na	12	5182	1001	1144	1336	1736	1846	1804	1629	1557	na	na	na	na	na	na	na	na	na
A143S	na	na	na	na	na	na	na	na	na	na	4	2069	1354	795	115	867	1093	821	896	1163	na	na	na	na	na	na	na	na	na	na	2470	3633	792	583	880	1025	970	1065	898	924	na	na	na	na	na	na	na	na	na
A143T	na	na	na	na	na	na	na	na	na	na	1	3785	2406	911	182	1141	1431	1631	1616	1863	na	na	na	na	na	na	na	na	na	na	4941	6172	1246	1274	1398	1848	1907	1882	1514	1514	na	na	na	na	na	na	na	na	na
A143V	na	na	na	na	na	na	na	na	na	na	7	4175	2178	1011	165	1311	1409	1512	1549	1933	na	na	na	na	na	na	na	na	na	na	4134	5606	1086	1186	1638	1815	1972	1955	1666	1675	na	na	na	na	na	na	na	na	na
A143W	na	na	na	na	na	na	na	na	na	na	1949	1461	923	383	59	433	547	575	541	709	na	na	na	na	na	na	na	na	na	na	11	2528	418	574	578	727	809	722	625	637	na	na	na	na	na	na	na	na	na
A143Y	na	na	na	na	na	na	na	na	na	na	729	651	378	228	20	234	161	325	242	292	na	na	na	na	na	na	na	na	na	na	827	1068	180	230	234	315	429	334	259	273	na	na	na	na	na	na	na	na	na
A145*	na	na	na	na	na	na	na	na	na	na	337	91	35	na	3	5	na	5	na	na	na	na	na	na	na	na	na	na	na	na	108	45	na	7	8	na	na	na	na	na	na	na	na	na	na	na	na	na	na
A145C	na	na	na	na	na	na	na	na	na	na	920	638	410	216	41	307	359	236	242	361	na	na	na	na	na	na	na	na	na	na	15	1223	308	242	317	368	433	388	372	379	na	na	na	na	na	na	na	na	na
A145D	na	na	na	na	na	na	na	na	na	na	1	1111	664	332	47	322	471	582	734	654	na	na	na	na	na	na	na	na	na	na	1421	1838	390	373	428	599	690	590	558	489	na	na	na	na	na	na	na	na	na
A145E	na	na	na	na	na	na	na	na	na	na	4	6	8	10	10	8	6	16	22	13	na	na	na	na	na	na	na	na	na	na	na	na	na	5	na	na	na	na	na	na	na	na	na	na	na	na	na	na	na
A145F	na	na	na	na	na	na	na	na	na	na	1923	1317	987	459	67	435	466	629	652	854	na	na	na	na	na	na	na	na	na	na	12	2483	564	532	603	777	862	801	746	822	na	na	na	na	na	na	na	na	na
A145G	na	na	na	na	na	na	na	na	na	na	2	8444	2078	478	93	896	2085	1626	1562	1189	na	na	na	na	na	na	na	na	na	na	8577	12452	628	592	821	919	1037	1004	932	904	na	na	na	na	na	na	na	na	na
A145H	na	na	na	na	na	na	na	na	na	na	2021	1577	1011	417	85	551	1034	724	1015	1066	na	na	na	na	na	na	na	na	na	na	1706	2621	583	467	674	915	1006	899	934	943	na	na	na	na	na	na	na	na	na
A145I	na	na	na	na	na	na	na	na	na	na	1316	1164	589	271	41	296	382	407	679	534	na	na	na	na	na	na	na	na	na	na	1134	1652	327	362	429	550	534	498	410	498	na	na	na	na	na	na	na	na	na
A145K	na	na	na	na	na	na	na	na	na	na	4427	3849	2313	993	183	1172	1873	1789	1807	1916	na	na	na	na	na	na	na	na	na	na	4924	5768	1227	1264	1468	1883	2111	2201	1701	1647	na	na	na	na	na	na	na	na	na
A145L	na	na	na	na	na	na	na	na	na	na	1	7882	4928	2137	348	3811	3679	3560	3595	4370	na	na	na	na	na	na	na	na	na	na	30	13428	2874	2633	3709	4195	4266	4423	3703	3728	na	na	na	na	na	na	na	na	na
A145M	na	na	na	na	na	na	na	na	na	na	3	2146	1280	648	106	827	1158	891	1347	1216	na	na	na	na	na	na	na	na	na	na	27	3403	865	817	708	1102	1097	1232	1092	1034	na	na	na	na	na	na	na	na	na
A145N	na	na	na	na	na	na	na	na	na	na	2525	1947	1192	541	75	703	3871	964	1089	1142	na	na	na	na	na	na	na	na	na	na	9	3554	773	663	813	1005	1112	1142	1038	983	na	na	na	na	na	na	na	na	na
A145P	na	na	na	na	na	na	na	na	na	na	1	3770	2299	1043	170	1131	1672	1578	1460	1849	na	na	na	na	na	na	na	na	na	na	21	6326	1360	1265	1513	2009	2145	2100	1689	1776	na	na	na	na	na	na	na	na	na
A145Q	na	na	na	na	na	na	na	na	na	na	2275	1894	963	488	80	540	1051	756	984	1078	na	na	na	na	na	na	na	na	na	na	1825	2822	574	692	599	886	955	923	898	833	na	na	na	na	na	na	na	na	na
A145R	na	na	na	na	na	na	na	na	na	na	8971	7143	4227	1856	287	2030	2184	2742	2808	3571	na	na	na	na	na	na	na	na	na	na	44	11367	2413	2341	3330	3490	3834	4033	3285	3060	na	na	na	na	na	na	na	na	na
A145S	na	na	na	na	na	na	na	na	na	na	5	2790	1519	695	147	848	1429	1130	1511	1420	na	na	na	na	na	na	na	na	na	na	3649	4453	818	825	1204	1326	1290	1538	1208	1160	na	na	na	na	na	na	na	na	na
A145T	na	na	na	na	na	na	na	na	na	na	4	1268	768	308	54	356	501	549	598	600	na	na	na	na	na	na	na	na	na	na	1716	1948	486	479	833	602	630	706	653	564	na	na	na	na	na	na	na	na	na
A145V	na	na	na	na	na	na	na	na	na	na	8	2438	861	403	67	347	625	716	663	777	na	na	na	na	na	na	na	na	na	na	2664	3711	513	491	514	737	730	676	624	649	na	na	na	na	na	na	na	na	na
A145W	na	na	na	na	na	na	na	na	na	na	4419	3124	2237	1045	140	1103	1127	1471	1549	1919	na	na	na	na	na	na	na	na	na	na	3772	5815	1198	1344	1432	1602	1695	1583	1430	1433	na	na	na	na	na	na	na	na	na
A145Y	na	na	na	na	na	na	na	na	na	na	1334	967	665	269	43	339	464	456	513	623	na	na	na	na	na	na	na	na	na	na	9	1689	346	359	409	486	569	513	468	517	na	na	na	na	na	na	na	na	na
A19*	385	na	47	18	14	5	16	16	7	64	na	na	na	na	na	na	na	na	na	na	652	86	24	29	36	30	16	15	na	23	na	na	na	na	na	na	na	na	na	na	133	61	26	16	31	26	24	18	16
A19C	1544	na	1044	599	894	889	990	1104	1399	7164	na	na	na	na	na	na	na	na	na	na	2076	2570	973	915	1420	1405	1908	1100	1705	1596	na	na	na	na	na	na	na	na	na	na	1210	2211	631	706	968	972	1055	1058	1167
A19D	na	na	na	na	na	na	8	na	13	na	na	na	na	na	na	na	na	na	na	na	15	9	na	na	na	8	16	na	na	na	na	na	na	na	na	na	na	na	na	na	21	29	na	na	na	na	na	7	na
A19E	2559	na	2905	1014	1335	1415	1048	924	570	6046	na	na	na	na	na	na	na	na	na	na	3419	3723	1640	1641	2223	1902	1609	989	1158	1150	na	na	na	na	na	na	na	na	na	na	2893	3508	1024	999	1611	1547	1399	1184	966
A19F	4	na	2152	1059	1469	2105	1948	2323	2082	19660	na	na	na	na	na	na	na	na	na	na	3250	3765	1481	1664	2479	2330	3314	2050	3303	3716	na	na	na	na	na	na	na	na	na	na	2012	3439	1086	1131	1894	2281	1886	2063	2230
A19G	43	na	14214	6053	7637	7792	9528	12586	11014	90979	na	na	na	na	na	na	na	na	na	na	19455	7	7977	8741	12269	12522	16529	10061	14343	16212	na	na	na	na	na	na	na	na	na	na	50	20379	6320	6296	9865	9169	9870	10379	10714
A19H	1364	na	1429	701	921	823	1346	1650	1401	10848	na	na	na	na	na	na	na	na	na	na	2222	2520	918	1094	1520	1477	1820	1311	1659	2284	na	na	na	na	na	na	na	na	na	na	1580	2337	841	741	1052	1041	1148	1148	1332
A19I	4	na	1717	836	1318	924	1220	1311	1271	11564	na	na	na	na	na	na	na	na	na	na	2775	3247	1364	1365	1871	1956	2325	1380	2113	1854	na	na	na	na	na	na	na	na	na	na	2010	2916	929	911	1417	1363	1347	1230	1258
A19K	11	na	4036	1834	2280	2124	2422	1864	1499	13663	na	na	na	na	na	na	na	na	na	na	6129	5607	2528	2426	3470	3052	3584	2028	2555	2549	na	na	na	na	na	na	na	na	na	na	9	5806	1749	1892	2714	2593	2683	2412	2024
A19L	6	na	7161	2642	3371	2502	3035	2587	2514	17203	na	na	na	na	na	na	na	na	na	na	8828	9245	3970	3960	5364	4843	4789	2770	3356	3484	na	na	na	na	na	na	na	na	na	na	17	8911	2946	2666	4006	3641	3723	3220	2789
A19M	4	na	2535	982	1292	1276	1121	1193	980	7605	na	na	na	na	na	na	na	na	na	na	3250	3418	1438	1446	2074	1827	1772	1295	1538	1813	na	na	na	na	na	na	na	na	na	na	11	3038	1071	976	1530	1405	1488	1262	1153
A19N	25	na	4064	1993	2627	2910	2870	3553	3004	27467	na	na	na	na	na	na	na	na	na	na	5834	7332	3075	3164	4669	4477	5808	3545	5444	6246	na	na	na	na	na	na	na	na	na	na	13	6778	2177	2065	3247	3174	3552	3389	3586
A19P	26	na	100	11	na	na	10	24	na	na	na	na	na	na	na	na	na	na	na	na	336	25	9	na	13	na	na	na	na	na	na	na	na	na	na	na	na	na	na	na	251	21	na	8	8	na	na	na	na
A19Q	1689	8	1333	690	990	728	830	704	904	5470	na	na	na	na	na	na	na	na	na	na	2473	2643	1104	1150	1587	1471	1613	947	1241	1169	na	na	na	na	na	na	na	na	na	na	8	2490	819	765	1116	1136	1148	1123	943
A19R	4	6	4996	1963	2435	2193	2360	1799	1493	9297	na	na	na	na	na	na	na	na	na	na	7166	6286	2640	2647	3704	3092	2776	1787	1895	2190	na	na	na	na	na	na	na	na	na	na	5	6598	2180	2152	2881	2845	2723	2244	2048
A19S	4	na	2585	1134	1420	1668	1524	1570	1366	11633	na	na	na	na	na	na	na	na	na	na	3555	3784	1683	1846	2223	2169	3294	1525	1991	1979	na	na	na	na	na	na	na	na	na	na	10	3852	1379	1311	1972	1710	1953	1723	1631
A19T	30	na	960	601	722	539	619	698	560	5775	na	na	na	na	na	na	na	na	na	na	1659	1806	827	835	1055	1069	1103	724	1010	1029	na	na	na	na	na	na	na	na	na	na	1272	1922	574	544	899	900	775	761	700
A19V	3329	na	4943	1227	1293	1210	935	846	585	5077	na	na	na	na	na	na	na	na	na	na	5205	5681	1668	1669	2279	1704	2597	887	1098	897	na	na	na	na	na	na	na	na	na	na	6	5478	1631	1198	1665	1686	1444	1267	898
A19W	18	na	3547	1716	2275	2299	2180	2371	2612	18076	na	na	na	na	na	na	na	na	na	na	5210	6366	2625	2613	3641	3393	4344	2640	2946	3688	na	na	na	na	na	na	na	na	na	na	10	5696	1960	1863	2538	2569	2618	2429	2284
A19Y	1467	na	1513	785	1074	1704	1572	1653	1434	11820	na	na	na	na	na	na	na	na	na	na	2500	2881	1224	1239	1851	1863	2554	1403	1958	2551	na	na	na	na	na	na	na	na	na	na	1622	2781	808	806	1450	1394	1381	1406	1505
A26*	370	na	107	15	25	22	6	na	na	na	na	na	na	na	na	na	na	na	na	na	922	134	44	54	80	47	58	20	19	33	na	na	na	na	na	na	na	na	na	na	252	87	42	29	28	72	36	15	7
A26C	796	na	692	215	258	334	196	308	87	951	na	na	na	na	na	na	na	na	na	na	1026	964	415	453	512	465	572	191	162	167	na	na	na	na	na	na	na	na	na	na	892	1106	455	413	436	468	307	337	195
A26D	na	na	na	na	na	9	6	na	na	na	na	na	na	na	na	na	na	na	na	na	na	na	na	na	na	na	na	na	na	na	na	na	na	na	na	na	na	na	na	na	na	na	na	na	na	na	na	na	na
A26E	4513	na	5398	1845	1999	1855	1250	1476	809	6954	na	na	na	na	na	na	na	na	na	na	6864	6317	2851	2712	3253	2532	2759	1201	1229	1094	na	na	na	na	na	na	na	na	na	na	5421	6907	2264	2186	2699	2289	2317	1763	1335
A26F	7	na	1791	707	996	1103	1318	903	911	4941	na	na	na	na	na	na	na	na	na	na	2656	2839	1334	1286	1772	1675	1672	1021	1370	1547	na	na	na	na	na	na	na	na	na	na	6	2940	947	877	1104	1357	1294	1163	1020
A26G	9	na	14348	4528	5386	4449	3468	2814	2394	14149	na	na	na	na	na	na	na	na	na	na	18844	8	7424	7256	8692	6928	6524	3294	3588	3713	na	na	na	na	na	na	na	na	na	na	45	7	6047	5520	7138	5807	5988	4640	3703
A26H	836	na	534	247	320	144	445	315	219	2093	na	na	na	na	na	na	na	na	na	na	902	989	336	396	626	680	714	369	441	615	na	na	na	na	na	na	na	na	na	na	646	1135	276	284	355	443	399	402	401
A26I	4	na	1275	448	569	965	827	724	564	4276	na	na	na	na	na	na	na	na	na	na	1665	1944	885	772	1132	1127	994	689	1091	1004	na	na	na	na	na	na	na	na	na	na	6	1857	578	611	843	741	916	855	783
A26K	3086	na	3647	867	914	451	849	303	229	1896	na	na	na	na	na	na	na	na	na	na	4254	3623	1565	1664	1655	1192	1068	491	510	462	na	na	na	na	na	na	na	na	na	na	3007	3834	1219	1176	1306	1227	1062	828	501
A26L	16	na	10669	3641	4150	3330	3172	3361	2117	16968	na	na	na	na	na	na	na	na	na	na	13702	14678	5852	5867	7553	6088	6404	3143	4647	3916	na	na	na	na	na	na	na	na	na	na	21	14358	5060	4421	5711	5396	4676	3919	3285
A26M	12	na	3521	982	1158	793	743	439	693	2874	na	na	na	na	na	na	na	na	na	na	4461	4141	1642	1664	1996	1525	1325	672	956	635	na	na	na	na	na	na	na	na	na	na	6	4671	1450	1314	1692	1565	1335	1043	745
A26N	605	na	866	286	319	234	225	306	114	1060	na	na	na	na	na	na	na	na	na	na	994	966	403	460	440	585	361	198	618	202	na	na	na	na	na	na	na	na	na	na	824	973	300	289	421	350	281	281	218
A26P	933	na	1228	366	449	472	471	365	309	2157	na	na	na	na	na	na	na	na	na	na	1344	1348	482	557	667	547	642	336	493	577	na	na	na	na	na	na	na	na	na	na	948	1125	554	367	537	576	570	457	420
A26Q	4	na	1921	693	945	590	454	583	505	4707	na	na	na	na	na	na	na	na	na	na	2633	2657	1176	1178	1391	1209	1289	626	807	815	na	na	na	na	na	na	na	na	na	na	2116	2718	900	840	1086	954	1112	849	665
A26R	6675	na	7617	2035	2538	1944	1977	1161	952	8894	na	na	na	na	na	na	na	na	na	na	10280	9584	3748	3923	4627	3232	3526	1497	2098	1791	na	na	na	na	na	na	na	na	na	na	12	9255	3125	2823	3298	3094	2860	2171	1426
A26S	1718	na	2156	534	632	375	675	336	206	2053	na	na	na	na	na	na	na	na	na	na	3010	2609	976	939	1062	770	802	468	324	421	na	na	na	na	na	na	na	na	na	na	2308	2733	779	687	846	619	756	540	430
A26T	1527	na	1542	548	653	466	494	512	287	2145	na	na	na	na	na	na	na	na	na	na	2055	2221	913	910	1140	1117	973	450	516	437	na	na	na	na	na	na	na	na	na	na	1658	2153	658	584	864	869	836	502	470
A26V	24	5	6493	2006	2414	1979	1430	1539	1267	5962	na	na	na	na	na	na	na	na	na	na	8163	8646	3453	3436	3963	2906	2781	1482	1569	1472	na	na	na	na	na	na	na	na	na	na	18	9546	2882	2595	3072	2527	2867	2010	1481
A26W	4271	na	4096	898	1064	521	725	467	300	2194	na	na	na	na	na	na	na	na	na	na	5229	4281	1667	1711	1893	1555	1369	633	767	658	na	na	na	na	na	na	na	na	na	na	10	4517	1502	1435	1525	1744	1291	962	729
A26Y	391	na	515	281	335	174	365	519	201	1780	na	na	na	na	na	na	na	na	na	na	928	1085	446	456	697	543	891	360	576	629	na	na	na	na	na	na	na	na	na	na	616	1023	387	313	400	298	392	365	392
A29*	518	na	85	23	12	34	9	30	7	47	na	na	na	na	na	na	na	na	na	na	546	82	23	39	36	33	22	8	11	na	na	na	na	na	na	na	na	na	na	na	224	85	18	14	11	7	21	21	17
A29C	1934	na	1502	651	796	603	687	413	361	2130	na	na	na	na	na	na	na	na	na	na	2530	2104	932	983	1266	1008	1089	484	731	498	na	na	na	na	na	na	na	na	na	na	5	2044	798	665	1014	1533	679	690	518
A29D	65	na	28	na	7	na	na	na	6	na	na	na	na	na	na	na	na	na	na	na	na	na	na	na	na	na	na	na	na	na	na	na	na	na	na	na	na	na	na	na	na	na	na	na	na	na	na	na	na
A29E	4	na	2378	1054	1418	1785	1814	1540	1433	11509	na	na	na	na	na	na	na	na	na	na	3704	3892	1557	1772	2467	2278	2893	1462	2183	2194	na	na	na	na	na	na	na	na	na	na	2824	3561	1084	1064	1577	1432	1762	1750	1540
A29F	7	na	2881	1385	1595	1227	1451	1303	1184	7746	na	na	na	na	na	na	na	na	na	na	4217	4715	2037	1905	2669	2608	2389	1490	2280	1811	na	na	na	na	na	na	na	na	na	na	7	4614	1748	1454	2050	1926	2081	1848	1516
A29G	6	na	5633	1627	2019	1493	1663	1542	1069	8901	na	na	na	na	na	na	na	na	na	na	7509	6266	2188	2385	3089	2562	2702	1443	1813	1913	na	na	na	na	na	na	na	na	na	na	5	6744	1567	1784	2387	1955	2139	1775	1638
A29H	5	na	2208	1244	1393	1328	1203	1492	704	5036	na	na	na	na	na	na	na	na	na	na	3650	3604	1428	1638	2126	1883	2086	984	1233	1122	na	na	na	na	na	na	na	na	na	na	6	3332	1186	1109	1420	1506	1372	1178	1014
A29I	1226	na	1761	570	648	244	356	448	235	1548	na	na	na	na	na	na	na	na	na	na	2272	1846	854	818	1016	761	1256	291	331	335	na	na	na	na	na	na	na	na	na	na	5	1877	726	770	840	841	660	491	366
A29K	4	5	2637	1239	1556	1253	1398	1034	1096	8330	na	na	na	na	na	na	na	na	na	na	4092	4218	1747	1817	2397	2150	4423	1234	1692	1752	na	na	na	na	na	na	na	na	na	na	3015	4437	1430	1412	1952	1846	1765	1757	1451
A29L	60	na	7647	3833	5211	4753	5419	5484	5324	41549	na	na	na	na	na	na	na	na	na	na	12813	14536	5895	6459	8858	8670	10195	5782	8252	8682	na	na	na	na	na	na	na	na	na	na	30	14502	4592	4645	6845	6723	6693	6749	6221
A29M	1994	21	2421	711	887	684	545	932	397	2440	na	na	na	na	na	na	na	na	na	na	2861	2494	1056	1216	1267	923	2307	471	493	530	na	na	na	na	na	na	na	na	na	na	2058	2704	899	754	1131	819	884	753	546
A29N	1747	na	1836	455	496	414	267	125	112	932	na	na	na	na	na	na	na	na	na	na	2974	2080	897	806	807	605	978	222	338	173	na	na	na	na	na	na	na	na	na	na	2256	2135	711	841	769	657	620	368	258
A29P	3229	na	1947	143	101	66	86	59	7	na	na	na	na	na	na	na	na	na	na	na	3849	628	285	242	185	72	59	48	54	na	na	na	na	na	na	na	na	na	na	na	3304	678	325	219	147	119	233	95	55
A29Q	8	na	2320	1218	1560	1403	1725	1535	1587	12544	na	na	na	na	na	na	na	na	na	na	3623	4163	1686	1764	2513	2479	3116	1677	2671	2495	na	na	na	na	na	na	na	na	na	na	8	3872	1220	1259	2024	1911	2008	1988	1976
A29R	6	na	7699	2721	3402	2473	3336	2605	2185	16023	na	na	na	na	na	na	na	na	na	na	9660	9557	3944	4069	5290	4921	5057	2596	3447	3564	na	na	na	na	na	na	na	na	na	na	13	9538	3274	3085	3985	3452	3856	3259	2816
A29S	3552	7	4290	1123	1338	1000	1287	1306	888	7099	na	na	na	na	na	na	na	na	na	na	6276	6732	1680	1825	2395	1940	2656	1107	1359	1539	na	na	na	na	na	na	na	na	na	na	4655	6530	1418	1491	1853	1645	1776	1387	1275
A29T	27	12	2260	918	1106	567	937	875	809	11781	na	na	na	na	na	na	na	na	na	na	3515	3913	1155	1414	1690	1374	1827	911	1173	1248	na	na	na	na	na	na	na	na	na	na	16	3634	912	901	1331	1207	1220	1124	922
A29V	7	na	3276	1134	1397	1171	1273	800	893	7369	na	na	na	na	na	na	na	na	na	na	4869	4597	1427	1520	1995	1821	2120	1025	1341	1160	na	na	na	na	na	na	na	na	na	na	3831	5022	1389	1123	1581	1567	1573	1441	1138
A29W	9	na	2247	997	1331	999	1215	896	1026	10313	na	na	na	na	na	na	na	na	na	na	3208	3723	1532	1592	2068	2159	2574	1229	1510	1757	na	na	na	na	na	na	na	na	na	na	8	3733	1120	1275	1665	1756	1603	1536	1347
A29Y	1888	na	1929	723	801	474	429	267	413	2430	na	na	na	na	na	na	na	na	na	na	2746	2386	985	1063	1061	929	1088	482	334	354	na	na	na	na	na	na	na	na	na	na	2138	2255	962	760	1208	741	935	644	480
A6*	150	na	45	na	10	na	8	na	na	na	na	na	na	na	na	na	na	na	na	na	406	90	17	18	28	20	34	na	na	na	na	na	na	na	na	na	na	na	na	na	89	47	17	12	15	18	16	na	na
A6C	4	na	941	247	326	467	421	408	367	4562	na	na	na	na	na	na	na	na	na	na	1048	969	422	446	588	589	880	446	908	822	na	na	na	na	na	na	na	na	na	na	704	913	336	305	458	297	422	478	552
A6D	273	na	103	5	na	na	na	na	na	na	na	na	na	na	na	na	na	na	na	na	334	34	8	na	17	10	na	na	na	28	na	na	na	na	na	na	na	na	na	na	97	30	na	9	22	21	12	na	na
A6F	31	na	5044	1901	1992	1953	1939	2373	2604	30492	na	na	na	na	na	na	na	na	na	na	6007	6900	2570	2787	3617	3385	4281	2642	4201	4570	na	na	na	na	na	na	na	na	na	na	20	8	1909	1881	2511	2310	2541	2553	2560
A6G	1322	8	2035	410	385	432	467	340	555	6314	na	na	na	na	na	na	na	na	na	na	1890	2388	555	665	978	791	776	499	561	843	na	na	na	na	na	na	na	na	na	na	1630	2081	457	464	660	537	670	627	495
A6H	111	na	72	5	10	18	11	na	13	239	na	na	na	na	na	na	na	na	na	na	619	71	24	27	34	15	36	9	23	11	na	na	na	na	na	na	na	na	na	na	177	53	38	19	30	na	9	7	9
A6I	14	na	1482	578	602	563	877	933	870	8651	na	na	na	na	na	na	na	na	na	na	1775	2393	856	886	1054	1074	1426	837	1372	1480	na	na	na	na	na	na	na	na	na	na	1294	2042	694	651	736	998	902	948	1043
A6K	395	na	83	18	12	11	15	na	na	144	na	na	na	na	na	na	na	na	na	na	773	137	43	30	33	25	14	12	39	9	na	na	na	na	na	na	na	na	na	na	193	55	20	23	32	32	15	11	19
A6L	18	na	11970	3320	3505	2716	2626	3502	1852	16383	na	na	na	na	na	na	na	na	na	na	14322	14516	5187	5482	6026	5080	5707	2740	3442	3250	na	na	na	na	na	na	na	na	na	na	12	13170	4146	4033	5038	3917	4025	3078	2705
A6M	na	na	na	na	na	na	na	na	na	na	na	na	na	na	na	na	na	na	na	na	2493	3277	1011	1159	1397	1217	1571	773	1182	946	na	na	na	na	na	na	na	na	na	na	7	2702	905	680	1160	1294	1023	856	806
A6N	1721	na	2541	486	494	322	370	688	384	2962	na	na	na	na	na	na	na	na	na	na	2329	2032	665	920	887	794	918	500	639	629	na	na	na	na	na	na	na	na	na	na	1717	1632	609	573	865	763	708	690	597
A6P	392	na	88	16	11	22	na	na	9	41	na	na	na	na	na	na	na	na	na	na	793	92	17	61	40	21	39	19	43	29	na	na	na	na	na	na	na	na	na	na	224	52	12	69	14	8	27	7	7
A6Q	979	na	425	63	50	66	19	29	410	290	na	na	na	na	na	na	na	na	na	na	1451	293	114	189	143	62	85	28	69	64	na	na	na	na	na	na	na	na	na	na	1326	262	142	132	102	123	103	95	87
A6R	441	na	113	21	15	16	na	10	na	na	na	na	na	na	na	na	na	na	na	na	1094	150	45	31	29	38	134	6	46	16	na	na	na	na	na	na	na	na	na	na	384	109	20	22	22	21	12	24	na
A6S	38	na	1542	775	1116	1380	1580	2175	2101	17328	na	na	na	na	na	na	na	na	na	na	2565	3516	1286	1419	1976	2051	2861	1920	3471	4049	na	na	na	na	na	na	na	na	na	na	6	2948	856	907	1419	1549	1655	1936	2097
A6T	4	na	1216	439	660	709	1019	1006	1565	13568	na	na	na	na	na	na	na	na	na	na	1853	3117	572	942	1113	1267	1721	1367	2699	3222	na	na	na	na	na	na	na	na	na	na	6	11	594	469	752	1172	844	1124	1405
A6V	26	5	2114	542	651	867	1127	898	806	7086	na	na	na	na	na	na	na	na	na	na	2270	2605	710	841	975	1052	1236	872	999	1322	na	na	na	na	na	na	na	na	na	na	23	2319	634	687	1067	1198	941	996	1090
A6W	316	na	137	31	41	na	na	8	na	na	na	na	na	na	na	na	na	na	na	na	909	123	56	64	49	25	16	11	10	na	na	na	na	na	na	na	na	na	na	na	533	105	33	29	26	15	20	16	15
A6Y	613	na	327	123	135	71	118	45	96	650	na	na	na	na	na	na	na	na	na	na	908	420	178	178	239	159	276	104	168	166	na	na	na	na	na	na	na	na	na	na	755	433	235	182	296	252	246	270	238
A7*	364	na	89	8	na	114	na	na	na	na	na	na	na	na	na	na	na	na	na	na	445	57	24	25	17	14	21	6	na	na	na	na	na	na	na	na	na	na	na	na	180	50	10	6	na	na	9	na	7
A7C	1005	na	889	395	496	341	553	589	640	4442	na	na	na	na	na	na	na	na	na	na	1220	1320	595	630	973	769	736	627	964	999	na	na	na	na	na	na	na	na	na	na	914	1371	467	489	661	605	589	585	588
A7D	435	na	90	10	10	16	na	na	na	104	na	na	na	na	na	na	na	na	na	na	567	94	17	34	23	11	41	7	na	na	na	na	na	na	na	na	na	na	na	na	171	57	25	22	23	na	na	13	na
A7E	na	na	na	na	na	na	na	na	na	na	na	na	na	na	na	na	na	na	na	na	9	na	na	na	na	na	na	na	na	na	na	na	na	na	na	na	na	na	na	na	na	na	na	na	na	na	na	na	na
A7F	110	na	69	5	na	na	na	na	na	na	na	na	na	na	na	na	na	na	na	na	373	30	8	12	16	41	na	7	8	11	na	na	na	na	na	na	na	na	na	na	154	31	7	8	11	16	na	na	na
A7G	3562	6	3399	421	396	129	189	249	105	822	na	na	na	na	na	na	na	na	na	na	4076	2407	617	578	656	520	466	203	286	151	na	na	na	na	na	na	na	na	na	na	3066	2892	470	592	593	359	496	396	296
A7H	145	na	34	8	6	na	24	na	6	49	na	na	na	na	na	na	na	na	na	na	540	88	9	21	14	19	35	15	na	18	na	na	na	na	na	na	na	na	na	na	231	57	26	10	23	na	8	10	8
A7I	970	na	3339	552	591	536	608	370	772	2262	na	na	na	na	na	na	na	na	na	na	2060	2091	855	1033	1317	859	716	536	592	566	na	na	na	na	na	na	na	na	na	na	1462	2023	702	630	845	1014	799	777	535
A7K	565	na	77	9	7	na	24	na	na	na	na	na	na	na	na	na	na	na	na	na	625	62	32	73	18	25	na	na	8	10	na	na	na	na	na	na	na	na	na	na	246	48	23	10	8	19	12	7	7
A7L	3425	na	1779	299	252	98	65	57	27	382	na	na	na	na	na	na	na	na	na	na	4510	1341	541	398	378	223	384	99	145	105	na	na	na	na	na	na	na	na	na	na	4018	1241	503	408	399	480	262	204	95
A7M	785	na	445	65	46	89	44	150	19	187	na	na	na	na	na	na	na	na	na	na	1309	314	127	103	107	66	25	14	19	42	na	na	na	na	na	na	na	na	na	na	1029	281	154	121	69	85	112	45	22
A7N	2203	na	1998	387	312	170	209	191	171	1283	na	na	na	na	na	na	na	na	na	na	2417	1621	717	677	776	632	517	282	352	346	na	na	na	na	na	na	na	na	na	na	13	1787	649	546	657	753	558	451	309
A7P	1242	na	185	20	17	na	na	36	33	242	na	na	na	na	na	na	na	na	na	na	1793	237	75	81	71	54	64	20	22	9	na	na	na	na	na	na	na	na	na	na	417	173	89	57	39	14	57	32	32
A7Q	159	na	50	na	na	na	na	na	na	na	na	na	na	na	na	na	na	na	na	na	292	36	na	15	na	13	na	na	na	na	na	na	na	na	na	na	na	na	na	na	106	38	6	10	na	na	na	na	na
A7R	480	na	187	5	9	na	na	na	na	na	na	na	na	na	na	na	na	na	na	na	885	116	52	36	28	na	67	13	na	14	na	na	na	na	na	na	na	na	na	na	285	103	25	50	20	na	15	7	na
A7S	2507	na	3358	995	973	633	785	708	509	3491	na	na	na	na	na	na	na	na	na	na	4084	3408	1280	1403	1648	1299	1446	770	768	797	na	na	na	na	na	na	na	na	na	na	3082	3475	1457	1176	1490	1259	1132	1009	786
A7T	2446	na	3614	833	712	568	606	459	298	2524	na	na	na	na	na	na	na	na	na	na	3456	2700	1161	1335	1403	1101	959	588	584	731	na	na	na	na	na	na	na	na	na	na	10	2969	1050	877	1071	897	996	877	603
A7V	3255	na	3522	719	713	441	574	585	293	2238	na	na	na	na	na	na	na	na	na	na	3942	2953	996	1050	1238	934	804	494	555	465	na	na	na	na	na	na	na	na	na	na	3202	3517	827	768	928	815	922	647	491
A7W	218	na	68	7	7	19	11	na	na	50	na	na	na	na	na	na	na	na	na	na	341	32	20	16	11	17	18	11	na	39	na	na	na	na	na	na	na	na	na	na	87	37	18	24	na	17	11	na	na
A7Y	255	na	44	17	7	7	na	19	na	na	na	na	na	na	na	na	na	na	na	na	307	36	28	21	22	11	18	8	31	na	na	na	na	na	na	na	na	na	na	na	136	32	13	na	na	12	8	na	na
A81*	321	78	na	10	18	40	na	21	7	78	na	na	na	na	na	na	na	na	na	na	na	na	na	na	na	na	na	na	na	na	124	31	na	na	na	na	na	na	na	na	na	na	na	na	na	na	na	na	na
A81C	721	571	na	289	340	249	397	381	402	2652	na	na	na	na	na	na	na	na	na	na	na	na	na	na	na	na	na	na	na	na	1032	991	259	229	234	202	251	325	318	312	na	na	na	na	na	na	na	na	na
A81D	na	na	23	na	na	na	na	na	na	na	na	na	na	na	na	na	na	na	na	na	na	na	na	na	na	na	na	na	na	na	na	na	na	na	na	na	na	na	na	na	na	na	na	na	na	na	na	na	na
A81E	383	86	na	na	na	45	na	na	na	na	na	na	na	na	na	na	na	na	na	na	na	na	na	na	na	na	na	na	na	na	114	na	na	na	na	na	na	na	na	na	na	na	na	na	na	na	na	na	na
A81F	179	134	na	92	38	51	11	23	na	na	na	na	na	na	na	na	na	na	na	na	na	na	na	na	na	na	na	na	na	na	356	12	34	11	51	6	12	8	na	na	na	na	na	na	na	na	na	na	na
A81G	2065	2692	116	1434	1736	1468	1291	1622	1168	9072	na	na	na	na	na	na	na	na	na	na	na	na	na	na	na	na	na	na	na	na	4306	4049	867	723	614	678	844	864	697	677	na	na	na	na	na	na	na	na	na
A81H	231	47	na	8	17	22	28	na	10	na	na	na	na	na	na	na	na	na	na	na	na	na	na	na	na	na	na	na	na	na	211	114	na	na	na	na	na	na	na	na	na	na	na	na	na	na	na	na	na
A81I	604	762	na	325	354	206	222	291	222	1076	na	na	na	na	na	na	na	na	na	na	na	na	na	na	na	na	na	na	na	na	1109	821	275	334	264	348	235	291	164	148	na	na	na	na	na	na	na	na	na
A81K	603	126	na	51	31	26	22	27	9	119	na	na	na	na	na	na	na	na	na	na	na	na	na	na	na	na	na	na	na	na	298	63	6	na	5	na	6	na	na	na	na	na	na	na	na	na	na	na	na
A81L	2475	2824	na	939	998	825	479	450	372	2983	na	na	na	na	na	na	na	na	na	na	na	na	na	na	na	na	na	na	na	na	4054	2395	781	730	807	849	711	560	472	409	na	na	na	na	na	na	na	na	na
A81M	785	1125	na	387	424	325	298	222	210	1476	na	na	na	na	na	na	na	na	na	na	na	na	na	na	na	na	na	na	na	na	1543	1062	340	287	387	413	334	312	220	163	na	na	na	na	na	na	na	na	na
A81N	245	239	na	30	17	12	na	105	na	na	na	na	na	na	na	na	na	na	na	na	na	na	na	na	na	na	na	na	na	na	193	6	6	26	5	na	na	na	6	na	na	na	na	na	na	na	na	na	na
A81P	218	6	na	na	na	na	na	na	na	na	na	na	na	na	na	na	na	na	na	na	na	na	na	na	na	na	na	na	na	na	156	na	na	na	na	na	na	na	na	na	na	na	na	na	na	na	na	na	na
A81Q	164	19	na	14	8	27	9	na	26	134	na	na	na	na	na	na	na	na	na	na	na	na	na	na	na	na	na	na	na	na	149	na	6	na	na	na	na	na	na	na	na	na	na	na	na	na	na	na	na
A81R	834	136	na	37	36	24	18	31	12	153	na	na	na	na	na	na	na	na	na	na	na	na	na	na	na	na	na	na	na	na	261	107	na	na	na	na	na	12	na	na	na	na	na	na	na	na	na	na	na
A81S	823	1403	na	604	730	398	540	539	259	1665	na	na	na	na	na	na	na	na	na	na	na	na	na	na	na	na	na	na	na	na	1908	1342	337	329	391	373	361	351	238	309	na	na	na	na	na	na	na	na	na
A81T	671	1080	na	464	486	511	496	382	227	1969	na	na	na	na	na	na	na	na	na	na	na	na	na	na	na	na	na	na	na	na	1531	1978	331	266	283	356	341	395	255	251	na	na	na	na	na	na	na	na	na
A81V	1986	3216	na	1250	1473	1263	1288	1246	1087	8311	na	na	na	na	na	na	na	na	na	na	na	na	na	na	na	na	na	na	na	na	4054	4894	1168	1045	921	1226	1185	1304	1058	1010	na	na	na	na	na	na	na	na	na
A81W	594	326	na	88	67	na	15	85	7	181	na	na	na	na	na	na	na	na	na	na	na	na	na	na	na	na	na	na	na	na	694	18	25	23	18	37	40	8	na	na	na	na	na	na	na	na	na	na	na
A81Y	321	84	na	43	30	45	na	na	na	na	na	na	na	na	na	na	na	na	na	na	na	na	na	na	na	na	na	na	na	na	291	18	14	na	10	8	na	na	na	na	na	na	na	na	na	na	na	na	na
A83*	333	92	na	29	38	12	22	96	9	288	na	na	na	na	na	na	na	na	na	na	na	na	na	na	na	na	na	na	na	na	374	57	na	na	20	na	na	na	na	na	na	na	na	na	na	na	na	na	na
A83C	347	502	na	220	336	125	218	328	235	1977	na	na	na	na	na	na	na	na	na	na	na	na	na	na	na	na	na	na	na	na	832	538	270	349	242	365	331	371	349	396	na	na	na	na	na	na	na	na	na
A83D	827	1210	na	719	848	598	820	620	783	4266	na	na	na	na	na	na	na	na	na	na	na	na	na	na	na	na	na	na	na	na	2465	1759	676	632	677	747	804	829	808	853	na	na	na	na	na	na	na	na	na
A83E	233	575	na	18	41	na	110	12	21	193	na	na	na	na	na	na	na	na	na	na	na	na	na	na	na	na	na	na	na	na	104	526	8	16	27	30	32	26	34	27	na	na	na	na	na	na	na	na	na
A83F	1037	1203	na	623	755	938	884	863	831	6083	na	na	na	na	na	na	na	na	na	na	na	na	na	na	na	na	na	na	na	na	2188	1137	618	743	1077	700	750	945	821	923	na	na	na	na	na	na	na	na	na
A83G	1241	3706	na	832	954	881	1059	813	977	6404	na	na	na	na	na	na	na	na	na	na	na	na	na	na	na	na	na	na	na	na	2414	3264	435	540	573	512	568	575	565	612	na	na	na	na	na	na	na	na	na
A83H	405	748	na	423	429	499	396	782	439	3089	na	na	na	na	na	na	na	na	na	na	na	na	na	na	na	na	na	na	na	na	1121	11	330	350	316	459	441	457	521	496	na	na	na	na	na	na	na	na	na
A83I	843	1070	na	515	561	404	921	848	647	4816	na	na	na	na	na	na	na	na	na	na	na	na	na	na	na	na	na	na	na	na	1718	1414	456	492	484	659	648	793	772	729	na	na	na	na	na	na	na	na	na
A83K	5720	8596	na	3878	5068	6396	5641	5471	4867	42035	na	na	na	na	na	na	na	na	na	na	na	na	na	na	na	na	na	na	na	na	14793	12334	4451	4234	4817	5409	5444	6152	5692	6098	na	na	na	na	na	na	na	na	na
A83L	3005	4559	na	2265	2778	2601	2659	2929	3155	19643	na	na	na	na	na	na	na	na	na	na	na	na	na	na	na	na	na	na	na	na	7401	5868	1894	1777	2048	2369	2531	2928	2558	2769	na	na	na	na	na	na	na	na	na
A83M	2134	2461	na	1159	1457	1562	1436	1853	1405	10644	na	na	na	na	na	na	na	na	na	na	na	na	na	na	na	na	na	na	na	na	3937	3372	1140	1305	1487	1428	1441	1784	1580	1523	na	na	na	na	na	na	na	na	na
A83N	1856	2666	na	1322	1612	1618	1676	1822	1386	11777	na	na	na	na	na	na	na	na	na	na	na	na	na	na	na	na	na	na	na	na	4592	4112	1362	1323	1337	1661	1719	1989	1893	1998	na	na	na	na	na	na	na	na	na
A83P	77	187	na	83	84	32	35	91	38	361	na	na	na	na	na	na	na	na	na	na	na	na	na	na	na	na	na	na	na	na	276	682	44	52	26	52	50	67	49	50	na	na	na	na	na	na	na	na	na
A83Q	1491	1637	na	883	1083	966	1203	1037	851	7120	na	na	na	na	na	na	na	na	na	na	na	na	na	na	na	na	na	na	na	na	2773	2311	682	692	657	874	904	1041	898	915	na	na	na	na	na	na	na	na	na
A83R	3630	4400	na	2285	2917	3173	2882	2747	2678	19410	na	na	na	na	na	na	na	na	na	na	na	na	na	na	na	na	na	na	na	na	7103	5431	1833	1766	1706	2071	2131	2472	2173	2338	na	na	na	na	na	na	na	na	na
A83S	529	881	na	441	525	537	618	785	433	3922	na	na	na	na	na	na	na	na	na	na	na	na	na	na	na	na	na	na	na	na	1553	1089	444	383	736	531	556	723	599	720	na	na	na	na	na	na	na	na	na
A83T	188	495	na	242	321	233	421	324	309	2215	na	na	na	na	na	na	na	na	na	na	na	na	na	na	na	na	na	na	na	na	911	851	252	237	214	321	314	489	364	351	na	na	na	na	na	na	na	na	na
A83V	1976	3137	na	544	567	849	868	872	836	5570	na	na	na	na	na	na	na	na	na	na	na	na	na	na	na	na	na	na	na	na	3775	2824	155	145	206	289	272	304	282	250	na	na	na	na	na	na	na	na	na
A83W	2106	2761	na	1334	1639	1279	2295	2045	1872	15600	na	na	na	na	na	na	na	na	na	na	na	na	na	na	na	na	na	na	na	na	4196	3713	1010	921	998	1172	1266	1439	1272	1338	na	na	na	na	na	na	na	na	na
A83Y	529	702	na	271	396	352	350	417	402	3028	na	na	na	na	na	na	na	na	na	na	na	na	na	na	na	na	na	na	na	na	1116	725	373	362	284	495	391	538	462	539	na	na	na	na	na	na	na	na	na
A84*	188	160	na	28	19	na	18	24	11	139	na	na	na	na	na	na	na	na	na	na	na	na	na	na	na	na	na	na	na	na	114	na	na	na	na	na	na	na	na	na	na	na	na	na	na	na	na	na	na
A84C	45	148	na	53	44	185	61	35	35	564	na	na	na	na	na	na	na	na	na	na	na	na	na	na	na	na	na	na	na	na	101	182	40	44	43	58	60	62	77	57	na	na	na	na	na	na	na	na	na
A84D	984	1696	na	677	842	721	676	576	483	3775	na	na	na	na	na	na	na	na	na	na	na	na	na	na	na	na	na	na	na	na	2367	2908	631	689	671	777	850	824	642	671	na	na	na	na	na	na	na	na	na
A84E	520	1045	na	na	7	42	na	25	na	na	na	na	na	na	na	na	na	na	na	na	na	na	na	na	na	na	na	na	na	na	1144	974	na	na	na	na	9	7	na	na	na	na	na	na	na	na	na	na	na
A84F	77	173	na	63	64	46	77	33	50	802	na	na	na	na	na	na	na	na	na	na	na	na	na	na	na	na	na	na	na	na	133	36	40	73	54	70	56	59	47	105	na	na	na	na	na	na	na	na	na
A84G	1452	1943	na	885	1092	884	1079	1488	524	4872	na	na	na	na	na	na	na	na	na	na	na	na	na	na	na	na	na	na	na	na	2993	2505	788	908	836	886	1016	801	703	891	na	na	na	na	na	na	na	na	na
A84H	717	1182	na	453	615	517	661	863	912	4133	na	na	na	na	na	na	na	na	na	na	na	na	na	na	na	na	na	na	na	na	1480	1288	491	457	555	653	553	754	677	719	na	na	na	na	na	na	na	na	na
A84I	679	1184	na	652	769	726	552	810	909	6349	na	na	na	na	na	na	na	na	na	na	na	na	na	na	na	na	na	na	na	na	1885	1310	617	647	621	821	759	902	816	908	na	na	na	na	na	na	na	na	na
A84K	4460	6521	na	2970	3634	2766	3137	2712	2422	18382	na	na	na	na	na	na	na	na	na	na	na	na	na	na	na	na	na	na	na	na	10221	8354	3255	3169	3141	3822	3657	4037	3362	3631	na	na	na	na	na	na	na	na	na
A84L	1472	2422	na	1104	1198	1121	1200	1461	1198	7757	na	na	na	na	na	na	na	na	na	na	na	na	na	na	na	na	na	na	na	na	3104	2830	927	1223	1063	1181	1115	1302	1266	1315	na	na	na	na	na	na	na	na	na
A84M	1549	2261	na	1106	1449	1187	1463	1211	919	12800	na	na	na	na	na	na	na	na	na	na	na	na	na	na	na	na	na	na	na	na	3429	2423	995	1143	1195	1307	1298	1355	1209	1355	na	na	na	na	na	na	na	na	na
A84N	1387	2570	na	1149	1536	1055	1417	1109	1335	8211	na	na	na	na	na	na	na	na	na	na	na	na	na	na	na	na	na	na	na	na	4057	3187	1094	1108	1148	1481	1428	1454	1454	1641	na	na	na	na	na	na	na	na	na
A84P	1108	1028	na	323	346	130	258	46	136	498	na	na	na	na	na	na	na	na	na	na	na	na	na	na	na	na	na	na	na	na	2010	993	298	311	341	426	373	244	144	132	na	na	na	na	na	na	na	na	na
A84Q	477	847	na	355	440	492	334	574	279	2551	na	na	na	na	na	na	na	na	na	na	na	na	na	na	na	na	na	na	na	na	1185	946	463	367	407	437	453	413	438	462	na	na	na	na	na	na	na	na	na
A84R	3083	4648	na	2218	2694	1905	2080	1674	1901	14908	na	na	na	na	na	na	na	na	na	na	na	na	na	na	na	na	na	na	na	na	7355	5887	1874	2256	2075	2601	2237	2462	2141	2225	na	na	na	na	na	na	na	na	na
A84S	1010	1511	na	724	882	578	671	767	537	5665	na	na	na	na	na	na	na	na	na	na	na	na	na	na	na	na	na	na	na	na	2175	1520	861	615	618	845	886	880	738	887	na	na	na	na	na	na	na	na	na
A84T	835	1603	na	739	956	854	945	763	905	6684	na	na	na	na	na	na	na	na	na	na	na	na	na	na	na	na	na	na	na	na	2367	1986	741	778	791	964	922	1074	930	1109	na	na	na	na	na	na	na	na	na
A84V	1889	3525	na	849	1072	896	945	1152	774	7570	na	na	na	na	na	na	na	na	na	na	na	na	na	na	na	na	na	na	na	na	5751	5427	758	767	738	1062	965	1154	957	1090	na	na	na	na	na	na	na	na	na
A84W	246	350	na	164	173	56	147	154	153	1154	na	na	na	na	na	na	na	na	na	na	na	na	na	na	na	na	na	na	na	na	505	295	147	185	127	120	161	162	107	139	na	na	na	na	na	na	na	na	na
A84Y	172	426	na	169	240	219	210	176	206	2452	na	na	na	na	na	na	na	na	na	na	na	na	na	na	na	na	na	na	na	na	560	347	198	201	152	225	205	195	210	204	na	na	na	na	na	na	na	na	na
A9*	442	na	39	7	10	na	na	na	na	70	na	na	na	na	na	na	na	na	na	na	422	58	19	27	22	na	13	10	21	na	na	na	na	na	na	na	na	na	na	na	221	44	na	8	26	8	11	na	na
A9C	5	na	1365	678	883	859	840	1170	880	7210	na	na	na	na	na	na	na	na	na	na	2035	2529	1000	1173	1336	1482	1587	1052	1520	1344	na	na	na	na	na	na	na	na	na	na	8	2371	790	745	1294	1179	1190	1049	1004
A9D	1664	na	1428	543	612	157	527	198	274	1493	na	na	na	na	na	na	na	na	na	na	1979	1847	715	761	996	770	756	394	314	371	na	na	na	na	na	na	na	na	na	na	1533	1994	663	587	870	551	733	550	408
A9E	5	na	9	na	na	6	18	10	na	na	na	na	na	na	na	na	na	na	na	na	na	na	na	na	na	na	na	na	na	na	na	na	na	na	na	na	na	na	na	na	na	na	na	na	na	na	na	na	na
A9F	1615	na	2077	510	569	415	381	284	400	1790	na	na	na	na	na	na	na	na	na	na	2193	1806	794	777	837	701	809	385	402	353	na	na	na	na	na	na	na	na	na	na	1501	1790	631	648	813	1044	648	576	389
A9G	5	na	6110	2406	3053	3400	3475	3328	2521	19878	na	na	na	na	na	na	na	na	na	na	8414	9851	3709	3769	5313	4603	5548	2963	5202	3780	na	na	na	na	na	na	na	na	na	na	6339	9616	2681	2438	3670	3275	3479	2953	2604
A9H	849	na	780	141	121	98	101	25	38	212	na	na	na	na	na	na	na	na	na	na	1679	673	278	242	223	152	169	58	67	30	na	na	na	na	na	na	na	na	na	na	1468	710	338	239	250	213	217	137	115
A9I	953	na	1588	433	480	588	394	397	1201	4019	na	na	na	na	na	na	na	na	na	na	1730	1714	728	671	918	785	1383	565	691	874	na	na	na	na	na	na	na	na	na	na	1320	1568	549	458	985	692	645	625	523
A9K	2016	na	1090	101	99	94	44	65	14	142	na	na	na	na	na	na	na	na	na	na	2485	867	350	234	235	79	142	44	60	15	na	na	na	na	na	na	na	na	na	na	2352	669	315	257	209	129	153	91	53
A9L	9	10	7827	2728	3393	2615	3130	3268	2478	17565	na	na	na	na	na	na	na	na	na	na	9312	8	3778	4164	5292	4645	5786	3096	3871	4397	na	na	na	na	na	na	na	na	na	na	13	13	3019	2947	4021	3981	3772	3401	3148
A9M	2186	na	2644	795	659	358	701	297	233	5663	na	na	na	na	na	na	na	na	na	na	3152	2351	1014	1048	1339	796	920	391	420	312	na	na	na	na	na	na	na	na	na	na	5	2550	909	809	940	947	850	605	468
A9N	13	na	1620	924	1313	1654	1985	2474	2631	22204	na	na	na	na	na	na	na	na	na	na	2210	2986	1259	1536	2138	2332	2871	2181	3209	5115	na	na	na	na	na	na	na	na	na	na	12	2942	1099	938	1568	1679	1601	1795	1944
A9P	13	na	1817	345	324	375	239	106	118	825	na	na	na	na	na	na	na	na	na	na	3162	1526	702	646	726	474	480	219	151	275	na	na	na	na	na	na	na	na	na	na	2483	1713	631	587	579	541	556	427	302
A9Q	11	na	2536	639	685	548	452	289	276	1756	na	na	na	na	na	na	na	na	na	na	2638	2109	819	859	1134	882	762	497	377	368	na	na	na	na	na	na	na	na	na	na	2306	2429	891	751	1055	794	872	691	445
A9R	4183	na	1751	167	158	36	71	66	69	447	na	na	na	na	na	na	na	na	na	na	5285	1267	530	372	318	172	231	69	151	104	na	na	na	na	na	na	na	na	na	na	4140	1252	964	373	320	250	226	109	103
A9S	5	na	3254	1374	1833	1941	2017	2241	1985	19567	na	na	na	na	na	na	na	na	na	na	4272	5466	2136	2151	3034	2973	3857	2376	3136	3429	na	na	na	na	na	na	na	na	na	na	16	4907	1613	1434	2399	2013	2261	2207	2016
A9T	15	na	3268	1680	2323	2532	3671	5310	5315	46648	na	na	na	na	na	na	na	na	na	na	5396	7326	2275	2709	4478	4586	5632	4456	7183	8783	na	na	na	na	na	na	na	na	na	na	14	6435	1829	1705	2860	3044	3330	3709	4211
A9V	7	9	5519	1182	1278	1184	1111	1285	1255	12189	na	na	na	na	na	na	na	na	na	na	6114	5670	1405	1570	2206	1952	2629	1377	1881	1892	na	na	na	na	na	na	na	na	na	na	12	5774	1529	1373	1543	1841	1669	1290	1372
A9W	3035	na	2985	757	662	495	313	347	272	1589	na	na	na	na	na	na	na	na	na	na	3655	2276	1100	905	1104	651	870	386	524	472	na	na	na	na	na	na	na	na	na	na	2973	2624	1075	933	1157	1006	818	634	472
A9Y	678	na	1068	264	198	213	100	123	90	688	na	na	na	na	na	na	na	na	na	na	1359	862	332	337	358	248	296	150	84	164	na	na	na	na	na	na	na	na	na	na	1187	874	301	299	326	470	287	226	135
C152*	na	na	na	na	na	na	na	na	na	na	3	21	8	na	3	11	na	na	na	na	na	na	na	na	na	na	na	na	na	na	119	11	5	na	na	na	na	na	na	na	na	na	na	na	na	na	na	na	na
C152A	na	na	na	na	na	na	na	na	na	na	2066	1583	1100	579	99	630	805	837	749	1049	na	na	na	na	na	na	na	na	na	na	2003	2842	561	633	694	895	942	913	929	868	na	na	na	na	na	na	na	na	na
C152D	na	na	na	na	na	na	na	na	na	na	557	497	283	119	21	201	213	237	316	329	na	na	na	na	na	na	na	na	na	na	716	884	217	170	239	273	293	300	262	288	na	na	na	na	na	na	na	na	na
C152E	na	na	na	na	na	na	na	na	na	na	1	1564	1102	494	76	717	955	911	869	1181	na	na	na	na	na	na	na	na	na	na	2089	2884	693	695	1013	973	1074	1195	1068	1074	na	na	na	na	na	na	na	na	na
C152F	na	na	na	na	na	na	na	na	na	na	14	na	7	4	10	4	na	na	7	na	na	na	na	na	na	na	na	na	na	na	na	6	na	na	na	na	na	na	na	na	na	na	na	na	na	na	na	na	na
C152G	na	na	na	na	na	na	na	na	na	na	4617	3718	2488	1043	174	1382	2004	2029	2413	2803	na	na	na	na	na	na	na	na	na	na	4982	6393	1348	1419	1575	1998	2341	2321	2345	2294	na	na	na	na	na	na	na	na	na
C152H	na	na	na	na	na	na	na	na	na	na	832	611	510	208	33	370	313	529	602	558	na	na	na	na	na	na	na	na	na	na	957	1132	239	284	347	361	457	469	393	416	na	na	na	na	na	na	na	na	na
C152I	na	na	na	na	na	na	na	na	na	na	469	433	263	108	20	191	225	230	414	272	na	na	na	na	na	na	na	na	na	na	612	665	99	109	125	147	166	163	184	165	na	na	na	na	na	na	na	na	na
C152K	na	na	na	na	na	na	na	na	na	na	1502	1379	882	416	66	585	713	734	981	1023	na	na	na	na	na	na	na	na	na	na	1562	2015	469	536	594	735	768	886	814	879	na	na	na	na	na	na	na	na	na
C152L	na	na	na	na	na	na	na	na	na	na	1	4197	2584	1212	233	1738	2289	2219	2612	2797	na	na	na	na	na	na	na	na	na	na	8	6146	1192	1222	1324	1793	1957	2020	1867	1849	na	na	na	na	na	na	na	na	na
C152M	na	na	na	na	na	na	na	na	na	na	930	707	488	270	41	328	599	410	721	711	na	na	na	na	na	na	na	na	na	na	1101	1250	279	333	475	447	523	539	464	553	na	na	na	na	na	na	na	na	na
C152N	na	na	na	na	na	na	na	na	na	na	790	659	399	183	27	246	432	280	494	486	na	na	na	na	na	na	na	na	na	na	750	1028	241	241	267	398	404	394	399	386	na	na	na	na	na	na	na	na	na
C152P	na	na	na	na	na	na	na	na	na	na	368	92	27	8	1	na	8	20	33	9	na	na	na	na	na	na	na	na	na	na	219	72	na	na	na	na	na	8	na	7	na	na	na	na	na	na	na	na	na
C152Q	na	na	na	na	na	na	na	na	na	na	771	701	453	429	34	151	286	300	396	513	na	na	na	na	na	na	na	na	na	na	790	1259	288	253	559	405	478	512	446	407	na	na	na	na	na	na	na	na	na
C152R	na	na	na	na	na	na	na	na	na	na	3	2171	1194	717	90	1011	1108	1253	1308	1590	na	na	na	na	na	na	na	na	na	na	2076	2869	570	613	703	912	953	1162	1052	1039	na	na	na	na	na	na	na	na	na
C152S	na	na	na	na	na	na	na	na	na	na	9	721	501	195	58	258	325	357	474	621	na	na	na	na	na	na	na	na	na	na	830	1160	230	189	267	328	400	417	401	400	na	na	na	na	na	na	na	na	na
C152T	na	na	na	na	na	na	na	na	na	na	2048	1778	1110	555	75	639	1101	1227	1275	1549	na	na	na	na	na	na	na	na	na	na	2205	2738	571	584	700	983	1119	1379	1073	1169	na	na	na	na	na	na	na	na	na
C152V	na	na	na	na	na	na	na	na	na	na	2552	2480	1437	587	81	858	1045	939	1233	1500	na	na	na	na	na	na	na	na	na	na	9	3517	737	732	917	1045	1183	1259	1057	1097	na	na	na	na	na	na	na	na	na
C152W	na	na	na	na	na	na	na	na	na	na	1	na	8	na	2	na	na	na	na	na	na	na	na	na	na	na	na	na	na	na	na	na	na	na	na	na	na	na	na	na	na	na	na	na	na	na	na	na	na
C152Y	na	na	na	na	na	na	na	na	na	na	1	na	na	na	2	na	na	na	na	na	na	na	na	na	na	na	na	na	na	na	na	na	na	na	na	na	na	na	na	na	na	na	na	na	na	na	na	na	na
C85*	281	44	na	na	na	20	na	na	na	na	na	na	na	na	na	na	na	na	na	na	na	na	na	na	na	na	na	na	na	na	109	na	na	na	na	na	na	na	na	na	na	na	na	na	na	na	na	na	na
C85A	2958	4461	na	2046	2574	3376	2703	3384	2468	21737	na	na	na	na	na	na	na	na	na	na	na	na	na	na	na	na	na	na	na	na	7108	4974	2202	2090	2462	2725	2742	3427	2838	3360	na	na	na	na	na	na	na	na	na
C85D	903	1037	na	253	224	146	95	49	26	298	na	na	na	na	na	na	na	na	na	na	na	na	na	na	na	na	na	na	na	na	1795	921	258	278	240	298	230	195	83	108	na	na	na	na	na	na	na	na	na
C85E	2307	3146	na	859	854	424	461	264	165	943	na	na	na	na	na	na	na	na	na	na	na	na	na	na	na	na	na	na	na	na	5449	3472	1139	928	1218	1083	896	767	444	400	na	na	na	na	na	na	na	na	na
C85F	28	52	na	16	26	25	na	79	75	185	na	na	na	na	na	na	na	na	na	na	na	na	na	na	na	na	na	na	na	na	91	138	10	17	na	14	19	10	15	25	na	na	na	na	na	na	na	na	na
C85G	8928	12306	22	5609	6758	6533	6653	5706	6180	45473	na	na	na	na	na	na	na	na	na	na	na	na	na	na	na	na	na	na	na	na	19297	14343	5323	5059	6069	5763	5901	6049	5540	6075	na	na	na	na	na	na	na	na	na
C85H	542	816	na	210	316	186	269	114	742	4793	na	na	na	na	na	na	na	na	na	na	na	na	na	na	na	na	na	na	na	na	1107	1758	291	296	295	341	295	309	248	240	na	na	na	na	na	na	na	na	na
C85I	1549	2515	na	1164	1432	1834	2120	2528	2154	19983	na	na	na	na	na	na	na	na	na	na	na	na	na	na	na	na	na	na	na	na	3400	3262	1062	1300	1066	1445	1543	1774	1777	2122	na	na	na	na	na	na	na	na	na
C85K	3831	3609	na	1135	1173	643	584	455	484	2244	na	na	na	na	na	na	na	na	na	na	na	na	na	na	na	na	na	na	na	na	7415	4315	1378	1349	1565	1402	1146	915	595	599	na	na	na	na	na	na	na	na	na
C85L	1645	1659	na	857	1068	939	1206	1515	1513	10816	na	na	na	na	na	na	na	na	na	na	na	na	na	na	na	na	na	na	na	na	2832	2601	843	844	896	1100	1077	1476	1251	1533	na	na	na	na	na	na	na	na	na
C85M	1393	1990	na	1035	1185	882	1044	1479	1255	7613	na	na	na	na	na	na	na	na	na	na	na	na	na	na	na	na	na	na	na	na	3314	2624	1116	991	1272	1172	1168	1266	1177	1322	na	na	na	na	na	na	na	na	na
C85N	2502	3911	na	1231	1531	933	1189	1021	663	4192	na	na	na	na	na	na	na	na	na	na	na	na	na	na	na	na	na	na	na	na	5607	4798	1477	1332	1476	1615	1593	1553	1084	1105	na	na	na	na	na	na	na	na	na
C85P	2350	3617	na	1519	1667	2011	1377	1401	705	6072	na	na	na	na	na	na	na	na	na	na	na	na	na	na	na	na	na	na	na	na	5740	5366	1418	1487	1538	1814	1760	1675	1225	1249	na	na	na	na	na	na	na	na	na
C85Q	1264	1092	na	411	390	376	274	97	137	657	na	na	na	na	na	na	na	na	na	na	na	na	na	na	na	na	na	na	na	na	1906	1000	403	409	444	453	372	398	234	237	na	na	na	na	na	na	na	na	na
C85R	2393	2304	na	672	674	667	326	449	184	2232	na	na	na	na	na	na	na	na	na	na	na	na	na	na	na	na	na	na	na	na	5088	2371	700	685	688	667	551	467	215	196	na	na	na	na	na	na	na	na	na
C85S	1643	2187	na	1061	1317	1134	1415	1174	1381	7727	na	na	na	na	na	na	na	na	na	na	na	na	na	na	na	na	na	na	na	na	3838	2951	1062	1070	1038	1260	1226	1416	1316	1468	na	na	na	na	na	na	na	na	na
C85T	4859	6282	na	2856	3690	3588	3895	4481	2831	20002	na	na	na	na	na	na	na	na	na	na	na	na	na	na	na	na	na	na	na	na	10950	8246	3160	3201	2826	3855	3972	4322	3767	4078	na	na	na	na	na	na	na	na	na
C85V	3447	5109	na	2440	3096	3075	3256	3526	2904	27563	na	na	na	na	na	na	na	na	na	na	na	na	na	na	na	na	na	na	na	na	8123	5910	2731	2828	3402	3366	3507	3933	3667	4177	na	na	na	na	na	na	na	na	na
C85W	32	13	77	42	26	28	68	95	100	379	na	na	na	na	na	na	na	na	na	na	na	na	na	na	na	na	na	na	na	na	na	na	na	na	na	na	na	na	na	na	na	na	na	na	na	na	na	na	na
C85Y	171	143	na	68	102	26	48	41	18	655	na	na	na	na	na	na	na	na	na	na	na	na	na	na	na	na	na	na	na	na	246	249	46	33	66	39	66	34	43	49	na	na	na	na	na	na	na	na	na
D11*	531	na	132	8	9	na	15	11	8	na	na	na	na	na	na	na	na	na	na	na	634	97	33	33	35	24	18	15	27	15	na	na	na	na	na	na	na	na	na	na	294	73	20	16	18	38	8	na	7
D116*	187	29	na	na	na	28	na	na	na	na	na	na	na	na	na	na	na	na	na	na	na	na	na	na	na	na	na	na	na	na	212	66	na	na	na	na	na	na	na	na	na	na	na	na	na	na	na	na	na
D116A	na	na	na	na	na	na	na	na	na	na	na	na	na	na	na	na	na	na	na	na	na	na	na	na	na	na	na	na	na	na	20	85	36	59	na	33	12	15	6	106	na	na	na	na	na	na	na	na	na
D116C	307	510	na	201	288	482	260	396	298	5350	na	na	na	na	na	na	na	na	na	na	na	na	na	na	na	na	na	na	na	na	875	901	185	189	166	268	453	420	416	425	na	na	na	na	na	na	na	na	na
D116E	na	na	na	na	na	na	na	na	na	na	na	na	na	na	na	na	na	na	na	na	na	na	na	na	na	na	na	na	na	na	12	8	na	na	27	6	na	6	na	na	na	na	na	na	na	na	na	na	na
D116F	1513	2358	na	1216	1754	1412	1947	2581	2620	22004	na	na	na	na	na	na	na	na	na	na	na	na	na	na	na	na	na	na	na	na	3811	2740	1063	1129	901	1156	1438	1714	1869	2241	na	na	na	na	na	na	na	na	na
D116G	3194	4891	na	2398	3143	3889	4455	4724	4224	41667	na	na	na	na	na	na	na	na	na	na	na	na	na	na	na	na	na	na	na	na	8498	6332	2340	2404	2576	2480	2941	3502	3787	4580	na	na	na	na	na	na	na	na	na
D116I	648	751	na	385	605	457	663	815	1021	9797	na	na	na	na	na	na	na	na	na	na	na	na	na	na	na	na	na	na	na	na	1403	1366	340	390	427	374	565	579	660	876	na	na	na	na	na	na	na	na	na
D116K	1420	2788	na	1210	1645	1562	2225	3013	2504	23993	na	na	na	na	na	na	na	na	na	na	na	na	na	na	na	na	na	na	na	na	4160	3653	1062	1162	1144	1282	1455	1813	1931	2238	na	na	na	na	na	na	na	na	na
D116L	4461	5591	na	2770	3828	3766	5256	5956	5527	52189	na	na	na	na	na	na	na	na	na	na	na	na	na	na	na	na	na	na	na	na	8813	6972	2785	2853	3441	3771	4244	4573	4777	5469	na	na	na	na	na	na	na	na	na
D116M	1024	1404	na	749	1026	860	1273	1214	1919	14096	na	na	na	na	na	na	na	na	na	na	na	na	na	na	na	na	na	na	na	na	2419	2035	819	858	1146	1148	1345	1561	1588	1796	na	na	na	na	na	na	na	na	na
D116N	6	na	na	na	na	na	na	na	na	na	na	na	na	na	na	na	na	na	na	na	na	na	na	na	na	na	na	na	na	na	9	6	na	na	na	na	na	na	na	na	na	na	na	na	na	na	na	na	na
D116P	742	1328	na	548	611	497	502	667	418	3765	na	na	na	na	na	na	na	na	na	na	na	na	na	na	na	na	na	na	na	na	2146	1543	614	603	567	816	788	835	655	694	na	na	na	na	na	na	na	na	na
D116Q	804	1068	na	316	613	698	698	978	791	7968	na	na	na	na	na	na	na	na	na	na	na	na	na	na	na	na	na	na	na	na	1783	1679	408	518	352	403	498	562	612	752	na	na	na	na	na	na	na	na	na
D116R	2542	4367	na	1989	2872	2228	3148	3786	3821	36941	na	na	na	na	na	na	na	na	na	na	na	na	na	na	na	na	na	na	na	na	7165	6586	2251	2421	2654	3222	3369	4226	4199	4492	na	na	na	na	na	na	na	na	na
D116S	1005	976	na	340	442	415	512	376	565	5299	na	na	na	na	na	na	na	na	na	na	na	na	na	na	na	na	na	na	na	na	1541	1572	320	373	313	395	439	543	501	491	na	na	na	na	na	na	na	na	na
D116T	464	1048	na	426	595	369	690	695	1270	5780	na	na	na	na	na	na	na	na	na	na	na	na	na	na	na	na	na	na	na	na	1354	992	334	463	755	534	639	643	621	736	na	na	na	na	na	na	na	na	na
D116V	1103	1724	na	751	1071	1067	1546	1649	1441	12962	na	na	na	na	na	na	na	na	na	na	na	na	na	na	na	na	na	na	na	na	2459	2343	708	650	626	776	942	1086	1132	1229	na	na	na	na	na	na	na	na	na
D116W	2102	2782	na	1341	1947	2450	2434	2059	2367	22169	na	na	na	na	na	na	na	na	na	na	na	na	na	na	na	na	na	na	na	na	4928	4728	1823	1580	2089	2127	2222	2711	2704	3038	na	na	na	na	na	na	na	na	na
D116Y	na	na	na	na	na	na	na	na	na	68	na	na	na	na	na	na	na	na	na	na	na	na	na	na	na	na	na	na	na	na	na	6	na	5	na	na	na	na	na	na	na	na	na	na	na	na	na	na	na
D11A	1873	na	2524	1173	1705	1296	1575	1517	1846	17146	na	na	na	na	na	na	na	na	na	na	3801	4299	1692	1846	2535	2647	2856	1901	2761	2898	na	na	na	na	na	na	na	na	na	na	37	4076	1380	1193	2012	1819	2025	2134	2063
D11C	512	na	642	314	361	216	195	371	288	1914	na	na	na	na	na	na	na	na	na	na	1014	912	487	421	599	500	541	252	346	200	na	na	na	na	na	na	na	na	na	na	729	887	308	306	405	363	393	331	252
D11E	2596	na	3800	776	820	1306	1056	2189	2100	16041	na	na	na	na	na	na	na	na	na	na	4685	6056	620	843	2145	2179	2776	1590	3155	2371	na	na	na	na	na	na	na	na	na	na	3401	5629	371	549	1021	1310	1226	1216	1631
D11F	1759	na	1395	364	328	124	303	89	59	525	na	na	na	na	na	na	na	na	na	na	2299	1417	596	571	650	435	322	159	349	156	na	na	na	na	na	na	na	na	na	na	1937	1665	637	506	607	414	492	380	239
D11G	82	6	23011	11908	16687	14919	18414	19527	17510	134478	na	na	na	na	na	na	na	na	na	na	36036	20	17328	19286	26757	26163	32391	18720	26693	27325	na	na	na	na	na	na	na	na	na	na	124	40716	12237	12488	18270	17704	19091	19347	18455
D11H	966	na	946	452	472	599	491	350	321	1782	na	na	na	na	na	na	na	na	na	na	1457	1351	633	601	868	667	976	350	478	253	na	na	na	na	na	na	na	na	na	na	1051	1448	446	432	663	606	550	394	376
D11I	780	na	312	48	67	30	42	na	14	48	na	na	na	na	na	na	na	na	na	na	1171	456	123	103	98	29	90	31	36	46	na	na	na	na	na	na	na	na	na	na	972	340	120	144	112	62	125	46	40
D11K	43	7	9055	4753	6845	6806	7836	9928	10929	92743	na	na	na	na	na	na	na	na	na	na	12696	16727	7432	7976	11263	11455	14425	9299	15717	17029	na	na	na	na	na	na	na	na	na	na	51	15519	4938	4889	7091	7144	8083	8119	8991
D11L	3683	na	4346	1118	1454	839	905	850	715	5412	na	na	na	na	na	na	na	na	na	na	5888	4657	1975	1860	2461	1953	2175	1109	1229	1230	na	na	na	na	na	na	na	na	na	na	11	4734	2125	1414	1866	2138	1862	1319	1116
D11M	1821	na	2263	893	1022	793	820	860	1191	3885	na	na	na	na	na	na	na	na	na	na	2940	2893	1185	1198	1667	1516	1812	902	1015	1127	na	na	na	na	na	na	na	na	na	na	6	2926	1023	810	1293	891	1199	973	855
D11N	5	na	4262	1682	2003	1487	1742	1505	1252	9606	na	na	na	na	na	na	na	na	na	na	5150	5674	2373	2602	3121	2740	2900	1616	1626	1594	na	na	na	na	na	na	na	na	na	na	9	5576	1670	1789	2350	2116	2162	1785	1606
D11P	948	na	782	354	409	396	392	319	415	2406	na	na	na	na	na	na	na	na	na	na	1316	1209	563	497	689	649	616	408	428	537	na	na	na	na	na	na	na	na	na	na	896	1226	392	358	652	456	445	493	455
D11Q	8	na	1451	665	951	677	1485	1383	1189	11742	na	na	na	na	na	na	na	na	na	na	2202	2684	1161	1184	1767	1781	2384	1369	2376	2791	na	na	na	na	na	na	na	na	na	na	14	2632	783	854	1234	1865	1209	1417	1467
D11R	21	15	6549	3055	4207	3903	4847	5131	5671	46112	na	na	na	na	na	na	na	na	na	na	8635	10798	4645	4903	7210	7068	10138	5460	8663	9274	na	na	na	na	na	na	na	na	na	na	23	10211	3560	3007	4641	5200	5093	5295	5301
D11S	8	6	2807	988	1301	862	1258	1295	1281	8176	na	na	na	na	na	na	na	na	na	na	3464	3616	1542	1625	2279	2086	2442	1328	1923	1831	na	na	na	na	na	na	na	na	na	na	2464	3341	1023	1115	1551	1680	1514	1366	1292
D11T	8	na	2008	1016	1213	1187	1346	1540	1109	9887	na	na	na	na	na	na	na	na	na	na	3155	3266	1358	1678	2067	2137	2941	1309	1681	1913	na	na	na	na	na	na	na	na	na	na	5	3064	976	913	1339	1138	1390	1305	1095
D11V	4975	na	4982	1208	1263	1008	823	882	662	4504	na	na	na	na	na	na	na	na	na	na	7778	5044	2401	2268	2491	1798	2098	1041	1567	1083	na	na	na	na	na	na	na	na	na	na	6326	5551	1777	1602	2275	1568	1767	1276	1038
D11W	14	na	5555	1380	1676	1079	1211	1085	963	5799	na	na	na	na	na	na	na	na	na	na	6922	5731	2448	2307	2989	2410	2359	1231	1390	1581	na	na	na	na	na	na	na	na	na	na	8	6153	2170	1904	2321	2008	2105	1594	1368
D11Y	1040	na	1456	405	481	120	211	211	217	1071	na	na	na	na	na	na	na	na	na	na	1729	1330	709	569	634	497	349	240	299	172	na	na	na	na	na	na	na	na	na	na	1221	1364	507	515	644	377	511	367	241
D122*	na	na	na	na	na	na	na	na	na	na	2	69	na	na	na	na	na	na	na	na	na	na	na	na	na	na	na	na	na	na	163	22	na	na	na	na	na	na	na	na	na	na	na	na	na	na	na	na	na
D122A	na	na	na	na	na	na	na	na	na	na	13	9	518	199	33	158	58	151	81	112	na	na	na	na	na	na	na	na	na	na	807	1072	268	177	195	182	208	97	61	62	na	na	na	na	na	na	na	na	na
D122C	na	na	na	na	na	na	na	na	na	na	738	314	324	114	12	16	14	39	6	36	na	na	na	na	na	na	na	na	na	na	576	693	170	104	167	127	116	49	53	46	na	na	na	na	na	na	na	na	na
D122E	na	na	na	na	na	na	na	na	na	na	16	na	12	na	15	6	na	6	na	na	na	na	na	na	na	na	na	na	na	na	17	na	na	na	na	na	na	na	na	na	na	na	na	na	na	na	na	na	na
D122F	na	na	na	na	na	na	na	na	na	na	1558	981	551	231	30	179	76	92	32	58	na	na	na	na	na	na	na	na	na	na	1557	1443	289	268	237	290	227	180	71	73	na	na	na	na	na	na	na	na	na
D122G	na	na	na	na	na	na	na	na	na	na	7639	4505	2813	1081	139	1043	761	719	592	611	na	na	na	na	na	na	na	na	na	na	37	6840	1860	1745	1773	1987	1788	1027	741	577	na	na	na	na	na	na	na	na	na
D122H	na	na	na	na	na	na	na	na	na	na	1	na	36	19	9	na	na	na	na	8	na	na	na	na	na	na	na	na	na	na	11	na	na	na	na	na	na	na	na	na	na	na	na	na	na	na	na	na	na
D122I	na	na	na	na	na	na	na	na	na	na	794	390	257	76	23	64	na	13	34	30	na	na	na	na	na	na	na	na	na	na	508	532	132	119	111	109	118	42	20	19	na	na	na	na	na	na	na	na	na
D122K	na	na	na	na	na	na	na	na	na	na	2758	1490	963	412	45	308	259	190	195	230	na	na	na	na	na	na	na	na	na	na	2471	2371	767	595	569	670	526	344	172	146	na	na	na	na	na	na	na	na	na
D122L	na	na	na	na	na	na	na	na	na	na	1	2883	1833	713	85	448	819	401	159	268	na	na	na	na	na	na	na	na	na	na	25	4509	1196	1183	1454	1176	905	682	398	296	na	na	na	na	na	na	na	na	na
D122M	na	na	na	na	na	na	na	na	na	na	2170	1399	852	407	58	293	205	185	141	152	na	na	na	na	na	na	na	na	na	na	1897	2335	775	524	552	767	600	380	290	191	na	na	na	na	na	na	na	na	na
D122N	na	na	na	na	na	na	na	na	na	na	4	8	8	7	3	22	na	15	na	7	na	na	na	na	na	na	na	na	na	na	na	9	na	na	na	na	na	na	na	na	na	na	na	na	na	na	na	na	na
D122P	na	na	na	na	na	na	na	na	na	na	2638	762	518	205	19	148	80	147	33	71	na	na	na	na	na	na	na	na	na	na	1916	1182	344	345	207	225	130	78	36	53	na	na	na	na	na	na	na	na	na
D122Q	na	na	na	na	na	na	na	na	na	na	1772	1135	948	275	40	216	425	257	292	201	na	na	na	na	na	na	na	na	na	na	21	1986	403	465	446	413	380	260	170	202	na	na	na	na	na	na	na	na	na
D122R	na	na	na	na	na	na	na	na	na	na	1	2512	1676	652	92	552	640	477	164	335	na	na	na	na	na	na	na	na	na	na	33	3949	1080	982	936	1095	843	634	401	328	na	na	na	na	na	na	na	na	na
D122S	na	na	na	na	na	na	na	na	na	na	3058	2214	1456	565	73	578	618	441	313	421	na	na	na	na	na	na	na	na	na	na	2797	3580	917	862	836	1042	917	702	477	480	na	na	na	na	na	na	na	na	na
D122T	na	na	na	na	na	na	na	na	na	na	2274	1687	1079	549	91	575	377	380	192	435	na	na	na	na	na	na	na	na	na	na	1854	2813	701	775	961	837	871	651	479	472	na	na	na	na	na	na	na	na	na
D122V	na	na	na	na	na	na	na	na	na	na	11	7	807	261	37	164	469	165	91	114	na	na	na	na	na	na	na	na	na	na	1897	1857	432	318	338	341	259	183	110	69	na	na	na	na	na	na	na	na	na
D122W	na	na	na	na	na	na	na	na	na	na	2430	1720	974	394	47	222	275	299	197	188	na	na	na	na	na	na	na	na	na	na	2418	2917	823	652	654	781	631	465	274	259	na	na	na	na	na	na	na	na	na
D122Y	na	na	na	na	na	na	na	na	na	na	14	7	10	11	12	na	na	na	na	na	na	na	na	na	na	na	na	na	na	na	na	na	na	na	na	na	na	na	na	na	na	na	na	na	na	na	na	na	na
D127*	na	na	na	na	na	na	na	na	na	na	124	8	na	na	na	na	na	na	na	na	na	na	na	na	na	na	na	na	na	na	na	na	na	na	na	na	na	na	na	na	na	na	na	na	na	na	na	na	na
D127A	na	na	na	na	na	na	na	na	na	na	10	23	2111	1063	195	1308	2126	2257	2309	2490	na	na	na	na	na	na	na	na	na	na	3518	5484	869	952	1246	1509	1728	1902	1736	1853	na	na	na	na	na	na	na	na	na
D127C	na	na	na	na	na	na	na	na	na	na	607	448	289	171	25	165	224	311	315	379	na	na	na	na	na	na	na	na	na	na	608	849	201	177	201	301	352	333	325	318	na	na	na	na	na	na	na	na	na
D127E	na	na	na	na	na	na	na	na	na	na	69	473	403	136	51	28	168	231	240	165	na	na	na	na	na	na	na	na	na	na	22	8	8	10	6	10	na	26	19	9	na	na	na	na	na	na	na	na	na
D127F	na	na	na	na	na	na	na	na	na	na	1316	1172	720	354	58	376	779	890	1418	982	na	na	na	na	na	na	na	na	na	na	1370	1864	437	478	579	709	850	844	796	878	na	na	na	na	na	na	na	na	na
D127G	na	na	na	na	na	na	na	na	na	na	11807	9695	6668	3006	506	4340	5184	6306	7190	7796	na	na	na	na	na	na	na	na	na	na	31	15690	3772	3793	4422	5852	6266	6855	6454	6676	na	na	na	na	na	na	na	na	na
D127H	na	na	na	na	na	na	na	na	na	na	10	10	1950	926	184	1203	1748	1991	2666	2763	na	na	na	na	na	na	na	na	na	na	3400	4849	1011	920	1070	1750	1841	2183	2007	1987	na	na	na	na	na	na	na	na	na
D127I	na	na	na	na	na	na	na	na	na	na	3112	2750	1773	848	169	1195	1371	1784	1922	2398	na	na	na	na	na	na	na	na	na	na	23	4538	1122	1181	1356	1733	1964	2041	1999	2093	na	na	na	na	na	na	na	na	na
D127K	na	na	na	na	na	na	na	na	na	na	7287	6176	4111	2005	296	2618	3356	3943	5926	5898	na	na	na	na	na	na	na	na	na	na	8	9557	2270	2223	2752	3622	3974	4375	4275	4485	na	na	na	na	na	na	na	na	na
D127L	na	na	na	na	na	na	na	na	na	na	1	7737	5317	2627	367	3186	4486	5413	7440	7005	na	na	na	na	na	na	na	na	na	na	41	13931	3141	3402	4321	5382	5684	6245	5761	5859	na	na	na	na	na	na	na	na	na
D127M	na	na	na	na	na	na	na	na	na	na	4141	3452	2342	1121	165	1689	2097	2446	2981	3021	na	na	na	na	na	na	na	na	na	na	27	5485	1337	1316	1640	2185	2294	2680	2482	2478	na	na	na	na	na	na	na	na	na
D127N	na	na	na	na	na	na	na	na	na	na	1	3497	2325	1134	177	1288	1751	1876	2861	2591	na	na	na	na	na	na	na	na	na	na	10	5142	1304	1290	1649	1804	2210	2192	2105	2160	na	na	na	na	na	na	na	na	na
D127P	na	na	na	na	na	na	na	na	na	na	2	6357	4141	1972	343	2630	3281	4132	5231	5222	na	na	na	na	na	na	na	na	na	na	27	10444	2268	2743	3441	3864	4207	4547	4322	4358	na	na	na	na	na	na	na	na	na
D127Q	na	na	na	na	na	na	na	na	na	na	2410	1499	869	476	59	549	513	893	746	960	na	na	na	na	na	na	na	na	na	na	2721	2050	415	325	327	526	504	510	522	585	na	na	na	na	na	na	na	na	na
D127R	na	na	na	na	na	na	na	na	na	na	2	5235	3291	1810	254	2179	2747	3779	4482	4961	na	na	na	na	na	na	na	na	na	na	62	8318	2053	2096	2755	3344	3781	4213	3888	4143	na	na	na	na	na	na	na	na	na
D127S	na	na	na	na	na	na	na	na	na	na	2909	2389	1569	808	134	906	1335	1397	1956	1854	na	na	na	na	na	na	na	na	na	na	3132	3908	1030	875	1419	1525	1726	1709	1687	1712	na	na	na	na	na	na	na	na	na
D127T	na	na	na	na	na	na	na	na	na	na	5546	4998	3023	1503	243	1734	2198	3159	3463	4004	na	na	na	na	na	na	na	na	na	na	19	7707	1876	1973	2763	2973	3248	3632	3204	3341	na	na	na	na	na	na	na	na	na
D127V	na	na	na	na	na	na	na	na	na	na	20	67	5186	2385	397	3690	4902	5077	6893	6782	na	na	na	na	na	na	na	na	na	na	8	12895	2414	2474	3064	3280	4082	4003	3972	4332	na	na	na	na	na	na	na	na	na
D127W	na	na	na	na	na	na	na	na	na	na	804	715	423	230	34	657	429	417	454	513	na	na	na	na	na	na	na	na	na	na	956	1130	264	376	766	417	486	516	443	481	na	na	na	na	na	na	na	na	na
D127Y	na	na	na	na	na	na	na	na	na	na	23	22	673	376	53	370	697	643	909	883	na	na	na	na	na	na	na	na	na	na	1076	1426	284	312	324	416	426	492	466	541	na	na	na	na	na	na	na	na	na
D131*	na	na	na	na	na	na	na	na	na	na	160	43	na	na	1	na	na	na	na	na	na	na	na	na	na	na	na	na	na	na	56	17	na	na	na	na	na	na	na	na	na	na	na	na	na	na	na	na	na
D131A	na	na	na	na	na	na	na	na	na	na	1	1686	1030	461	77	531	651	654	657	532	na	na	na	na	na	na	na	na	na	na	2355	2658	506	520	517	775	701	786	500	447	na	na	na	na	na	na	na	na	na
D131C	na	na	na	na	na	na	na	na	na	na	58	45	42	4	3	23	na	39	75	17	na	na	na	na	na	na	na	na	na	na	22	76	7	na	20	9	13	12	21	14	na	na	na	na	na	na	na	na	na
D131E	na	na	na	na	na	na	na	na	na	na	20	61	34	11	24	4	12	6	9	na	na	na	na	na	na	na	na	na	na	na	na	11	na	na	na	na	na	na	na	na	na	na	na	na	na	na	na	na	na
D131F	na	na	na	na	na	na	na	na	na	na	83	50	58	16	3	10	31	35	56	27	na	na	na	na	na	na	na	na	na	na	119	99	33	32	13	44	36	45	33	24	na	na	na	na	na	na	na	na	na
D131G	na	na	na	na	na	na	na	na	na	na	3	9907	5726	2697	397	2595	3592	2987	2700	3407	na	na	na	na	na	na	na	na	na	na	34	15211	3683	3482	3950	5069	4710	4771	3454	3453	na	na	na	na	na	na	na	na	na
D131H	na	na	na	na	na	na	na	na	na	na	2	317	209	67	11	96	199	175	131	105	na	na	na	na	na	na	na	na	na	na	308	525	143	133	134	150	168	124	123	148	na	na	na	na	na	na	na	na	na
D131I	na	na	na	na	na	na	na	na	na	na	1	721	464	212	40	247	428	253	216	483	na	na	na	na	na	na	na	na	na	na	1201	1323	360	295	708	464	539	421	437	407	na	na	na	na	na	na	na	na	na
D131K	na	na	na	na	na	na	na	na	na	na	4536	3441	2094	1115	165	1002	1253	1343	1322	1430	na	na	na	na	na	na	na	na	na	na	4405	5779	1252	1350	1359	1834	1820	1776	1615	1551	na	na	na	na	na	na	na	na	na
D131L	na	na	na	na	na	na	na	na	na	na	2078	1905	1053	618	61	624	883	666	665	902	na	na	na	na	na	na	na	na	na	na	2188	2772	637	651	794	1005	1131	1035	881	897	na	na	na	na	na	na	na	na	na
D131M	na	na	na	na	na	na	na	na	na	na	1306	1175	516	250	34	616	364	327	322	365	na	na	na	na	na	na	na	na	na	na	1252	1708	420	404	466	574	575	534	467	433	na	na	na	na	na	na	na	na	na
D131N	na	na	na	na	na	na	na	na	na	na	5	2031	1076	466	76	473	660	751	761	879	na	na	na	na	na	na	na	na	na	na	2296	3024	706	709	881	958	1011	979	867	858	na	na	na	na	na	na	na	na	na
D131P	na	na	na	na	na	na	na	na	na	na	3649	3050	1939	887	140	1001	1310	1269	1223	1756	na	na	na	na	na	na	na	na	na	na	15	4958	1113	1144	1233	1644	1769	1857	1613	1717	na	na	na	na	na	na	na	na	na
D131Q	na	na	na	na	na	na	na	na	na	na	688	533	300	160	23	164	221	131	109	205	na	na	na	na	na	na	na	na	na	na	656	760	221	173	168	223	247	237	141	153	na	na	na	na	na	na	na	na	na
D131R	na	na	na	na	na	na	na	na	na	na	1	2985	1734	991	120	839	982	937	1016	1204	na	na	na	na	na	na	na	na	na	na	61	4616	1122	1158	1304	1565	1654	1528	1281	1214	na	na	na	na	na	na	na	na	na
D131S	na	na	na	na	na	na	na	na	na	na	1271	1029	671	275	36	200	347	263	159	303	na	na	na	na	na	na	na	na	na	na	10	1417	306	353	377	487	459	468	363	319	na	na	na	na	na	na	na	na	na
D131T	na	na	na	na	na	na	na	na	na	na	3259	2625	1677	978	105	683	936	1001	1112	1101	na	na	na	na	na	na	na	na	na	na	4031	4494	1171	1035	1290	1533	1550	1307	1139	1127	na	na	na	na	na	na	na	na	na
D131V	na	na	na	na	na	na	na	na	na	na	9	2289	1580	715	118	728	764	861	528	843	na	na	na	na	na	na	na	na	na	na	2911	4032	797	854	798	940	953	873	779	718	na	na	na	na	na	na	na	na	na
D131W	na	na	na	na	na	na	na	na	na	na	1080	926	585	265	48	366	443	430	583	622	na	na	na	na	na	na	na	na	na	na	1243	1653	333	390	345	588	590	654	573	507	na	na	na	na	na	na	na	na	na
D131Y	na	na	na	na	na	na	na	na	na	na	8	192	120	61	21	55	94	57	107	152	na	na	na	na	na	na	na	na	na	na	172	273	49	44	40	72	88	68	72	90	na	na	na	na	na	na	na	na	na
D132*	na	na	na	na	na	na	na	na	na	na	195	105	15	na	na	na	na	na	na	na	na	na	na	na	na	na	na	na	na	na	86	na	na	na	na	na	na	na	na	na	na	na	na	na	na	na	na	na	na
D132A	na	na	na	na	na	na	na	na	na	na	2	1170	642	323	46	456	322	599	314	664	na	na	na	na	na	na	na	na	na	na	1480	1678	273	296	295	463	447	549	441	390	na	na	na	na	na	na	na	na	na
D132C	na	na	na	na	na	na	na	na	na	na	886	809	489	269	32	281	242	275	209	408	na	na	na	na	na	na	na	na	na	na	736	828	181	237	207	316	371	305	315	287	na	na	na	na	na	na	na	na	na
D132E	na	na	na	na	na	na	na	na	na	na	19	9	20	34	16	12	8	na	25	28	na	na	na	na	na	na	na	na	na	na	8	8	na	na	na	na	na	na	6	na	na	na	na	na	na	na	na	na	na
D132F	na	na	na	na	na	na	na	na	na	na	3135	2498	1816	992	127	1175	1551	1593	1731	1859	na	na	na	na	na	na	na	na	na	na	2862	3886	854	809	973	1352	1312	1499	1294	1273	na	na	na	na	na	na	na	na	na
D132G	na	na	na	na	na	na	na	na	na	na	2	4429	2990	1389	184	1656	9711	2205	1986	2907	na	na	na	na	na	na	na	na	na	na	6788	7188	1505	1660	1812	2423	2411	2741	2404	2425	na	na	na	na	na	na	na	na	na
D132H	na	na	na	na	na	na	na	na	na	na	2	na	10	na	6	na	na	8	7	14	na	na	na	na	na	na	na	na	na	na	34	23	8	na	na	na	8	na	6	na	na	na	na	na	na	na	na	na	na
D132I	na	na	na	na	na	na	na	na	na	na	1336	1124	712	299	55	322	356	617	919	838	na	na	na	na	na	na	na	na	na	na	15	1694	405	460	450	566	657	683	620	624	na	na	na	na	na	na	na	na	na
D132K	na	na	na	na	na	na	na	na	na	na	3795	3146	2054	1182	146	1312	1599	1937	2432	2419	na	na	na	na	na	na	na	na	na	na	12	4782	1223	1056	1598	1708	1857	1972	1885	1911	na	na	na	na	na	na	na	na	na
D132L	na	na	na	na	na	na	na	na	na	na	7921	6571	4290	2054	330	2750	3139	3654	3449	4567	na	na	na	na	na	na	na	na	na	na	28	10602	2545	2691	2974	3686	3986	4399	3911	4141	na	na	na	na	na	na	na	na	na
D132M	na	na	na	na	na	na	na	na	na	na	2512	2025	1418	683	105	688	912	1257	941	1328	na	na	na	na	na	na	na	na	na	na	8	3348	785	778	1197	1258	1218	1338	1162	1115	na	na	na	na	na	na	na	na	na
D132N	na	na	na	na	na	na	na	na	na	na	2	24	17	7	8	na	23	12	6	22	na	na	na	na	na	na	na	na	na	na	20	93	na	na	na	na	na	na	na	na	na	na	na	na	na	na	na	na	na
D132P	na	na	na	na	na	na	na	na	na	na	1	3567	2213	1237	164	1271	2429	1959	1728	2329	na	na	na	na	na	na	na	na	na	na	5273	5846	1471	1336	1494	2035	2064	2285	2161	2022	na	na	na	na	na	na	na	na	na
D132Q	na	na	na	na	na	na	na	na	na	na	1455	1501	729	345	50	475	634	618	887	656	na	na	na	na	na	na	na	na	na	na	1624	1992	327	369	461	545	700	668	524	573	na	na	na	na	na	na	na	na	na
D132R	na	na	na	na	na	na	na	na	na	na	5285	4876	3000	1313	218	2049	1769	2320	3038	3337	na	na	na	na	na	na	na	na	na	na	30	7123	1651	1916	2006	2601	2855	3244	2728	2779	na	na	na	na	na	na	na	na	na
D132S	na	na	na	na	na	na	na	na	na	na	4177	3401	2359	1117	159	1325	1659	2024	2398	2691	na	na	na	na	na	na	na	na	na	na	12	5690	1396	1227	1476	2014	2176	2415	2203	2190	na	na	na	na	na	na	na	na	na
D132T	na	na	na	na	na	na	na	na	na	na	3292	2853	1745	737	152	1079	1548	1814	2149	2314	na	na	na	na	na	na	na	na	na	na	9	4807	1104	1159	1309	1715	1766	2107	1931	2000	na	na	na	na	na	na	na	na	na
D132V	na	na	na	na	na	na	na	na	na	na	7	2431	1453	629	120	872	931	1277	1568	1591	na	na	na	na	na	na	na	na	na	na	2963	3663	579	671	757	951	952	1048	1019	1117	na	na	na	na	na	na	na	na	na
D132W	na	na	na	na	na	na	na	na	na	na	1527	1352	789	351	52	384	751	525	518	715	na	na	na	na	na	na	na	na	na	na	1254	2080	474	478	547	701	819	748	705	692	na	na	na	na	na	na	na	na	na
D132Y	na	na	na	na	na	na	na	na	na	na	na	na	23	na	8	na	na	na	8	na	na	na	na	na	na	na	na	na	na	na	na	na	na	na	na	na	na	na	na	na	na	na	na	na	na	na	na	na	na
D142*	na	na	na	na	na	na	na	na	na	na	658	126	43	na	2	8	na	9	7	na	na	na	na	na	na	na	na	na	na	na	357	75	na	na	na	na	na	na	na	na	na	na	na	na	na	na	na	na	na
D142A	na	na	na	na	na	na	na	na	na	na	1	1686	948	409	83	492	848	822	792	974	na	na	na	na	na	na	na	na	na	na	1929	2724	468	558	743	723	854	910	833	719	na	na	na	na	na	na	na	na	na
D142C	na	na	na	na	na	na	na	na	na	na	250	257	131	50	6	49	55	113	148	134	na	na	na	na	na	na	na	na	na	na	307	389	94	101	79	112	125	135	135	131	na	na	na	na	na	na	na	na	na
D142E	na	na	na	na	na	na	na	na	na	na	20	7	85	39	15	8	na	19	70	58	na	na	na	na	na	na	na	na	na	na	20	na	na	na	na	7	6	na	na	9	na	na	na	na	na	na	na	na	na
D142F	na	na	na	na	na	na	na	na	na	na	5357	4334	2697	1192	190	1640	1995	2318	2470	2738	na	na	na	na	na	na	na	na	na	na	19	7471	1499	1472	1713	2399	2501	2699	2463	2462	na	na	na	na	na	na	na	na	na
D142G	na	na	na	na	na	na	na	na	na	na	2	5392	3323	1400	226	1957	3363	2616	2901	3641	na	na	na	na	na	na	na	na	na	na	28	8831	2069	1914	2564	3009	3020	3291	2856	2915	na	na	na	na	na	na	na	na	na
D142H	na	na	na	na	na	na	na	na	na	na	1	2025	1329	634	113	679	1101	1064	1328	1401	na	na	na	na	na	na	na	na	na	na	2386	3654	769	675	780	1146	1310	1254	1234	1117	na	na	na	na	na	na	na	na	na
D142I	na	na	na	na	na	na	na	na	na	na	1484	1123	808	373	54	478	381	558	607	764	na	na	na	na	na	na	na	na	na	na	15	2060	549	446	521	745	741	785	624	638	na	na	na	na	na	na	na	na	na
D142K	na	na	na	na	na	na	na	na	na	na	5694	5027	2782	1261	223	1847	1763	2695	3089	3043	na	na	na	na	na	na	na	na	na	na	5021	7575	1765	1560	1850	2546	2867	2683	2492	2586	na	na	na	na	na	na	na	na	na
D142L	na	na	na	na	na	na	na	na	na	na	1	11585	7683	3310	579	4554	5985	6314	6581	8473	na	na	na	na	na	na	na	na	na	na	70	19868	4354	4576	5094	6352	7183	7118	6811	6676	na	na	na	na	na	na	na	na	na
D142M	na	na	na	na	na	na	na	na	na	na	2781	2475	1363	607	103	702	1170	1348	1198	1382	na	na	na	na	na	na	na	na	na	na	14	3385	699	741	880	1134	1153	1138	1026	1127	na	na	na	na	na	na	na	na	na
D142N	na	na	na	na	na	na	na	na	na	na	2257	1734	1121	526	75	698	727	889	917	1026	na	na	na	na	na	na	na	na	na	na	2352	2871	606	572	747	900	997	1018	907	850	na	na	na	na	na	na	na	na	na
D142P	na	na	na	na	na	na	na	na	na	na	7401	6435	3975	1701	293	2192	2648	3207	3940	4173	na	na	na	na	na	na	na	na	na	na	30	10230	2222	2150	2504	3491	3717	3836	3732	3597	na	na	na	na	na	na	na	na	na
D142Q	na	na	na	na	na	na	na	na	na	na	2940	2436	1400	720	112	1070	980	1279	1460	1526	na	na	na	na	na	na	na	na	na	na	2665	3833	853	809	994	1231	1385	1378	1255	1160	na	na	na	na	na	na	na	na	na
D142R	na	na	na	na	na	na	na	na	na	na	6032	5391	2985	1458	221	2172	2371	2844	2487	3057	na	na	na	na	na	na	na	na	na	na	11	8552	1753	1829	2220	2739	2901	3004	2636	2729	na	na	na	na	na	na	na	na	na
D142S	na	na	na	na	na	na	na	na	na	na	1	3147	2001	996	164	1037	1376	1847	1440	2009	na	na	na	na	na	na	na	na	na	na	23	5685	1134	1210	1768	1818	1925	2127	1825	1789	na	na	na	na	na	na	na	na	na
D142T	na	na	na	na	na	na	na	na	na	na	2996	2558	1464	632	117	1045	1366	1267	1207	1616	na	na	na	na	na	na	na	na	na	na	9	4188	885	795	1024	1298	1481	1520	1275	1344	na	na	na	na	na	na	na	na	na
D142V	na	na	na	na	na	na	na	na	na	na	2	4391	2787	1174	191	1672	2084	1904	2293	2837	na	na	na	na	na	na	na	na	na	na	5287	6990	1190	1413	1751	2090	2157	2269	2046	2156	na	na	na	na	na	na	na	na	na
D142W	na	na	na	na	na	na	na	na	na	na	4121	3405	2430	938	142	1143	1928	1538	2073	2059	na	na	na	na	na	na	na	na	na	na	18	6110	1260	1236	1434	1974	2057	2008	1869	1922	na	na	na	na	na	na	na	na	na
D142Y	na	na	na	na	na	na	na	na	na	na	4	1402	662	274	58	357	423	436	587	645	na	na	na	na	na	na	na	na	na	na	1414	1900	390	375	432	603	621	663	519	567	na	na	na	na	na	na	na	na	na
D144*	na	na	na	na	na	na	na	na	na	na	378	26	na	na	1	7	na	na	8	na	na	na	na	na	na	na	na	na	na	na	242	42	8	na	7	na	na	na	na	na	na	na	na	na	na	na	na	na	na
D144A	na	na	na	na	na	na	na	na	na	na	1	747	441	185	45	151	228	230	251	286	na	na	na	na	na	na	na	na	na	na	921	1213	166	219	305	269	302	242	218	226	na	na	na	na	na	na	na	na	na
D144C	na	na	na	na	na	na	na	na	na	na	502	429	274	118	11	104	54	108	137	209	na	na	na	na	na	na	na	na	na	na	538	674	163	153	155	224	197	218	154	159	na	na	na	na	na	na	na	na	na
D144E	na	na	na	na	na	na	na	na	na	na	8	16	41	13	19	17	na	15	34	na	na	na	na	na	na	na	na	na	na	na	32	20	na	na	na	na	na	na	na	na	na	na	na	na	na	na	na	na	na
D144F	na	na	na	na	na	na	na	na	na	na	1657	1123	674	291	41	327	212	276	298	357	na	na	na	na	na	na	na	na	na	na	1399	1728	354	358	391	470	461	421	272	303	na	na	na	na	na	na	na	na	na
D144G	na	na	na	na	na	na	na	na	na	na	1	3173	1789	802	148	1148	1647	1424	1780	1859	na	na	na	na	na	na	na	na	na	na	3698	4884	962	928	1230	1497	1669	1704	1587	1608	na	na	na	na	na	na	na	na	na
D144H	na	na	na	na	na	na	na	na	na	na	1118	1128	505	221	41	237	218	331	358	403	na	na	na	na	na	na	na	na	na	na	13	1291	299	271	379	423	339	391	300	293	na	na	na	na	na	na	na	na	na
D144I	na	na	na	na	na	na	na	na	na	na	889	709	363	129	28	158	581	244	292	203	na	na	na	na	na	na	na	na	na	na	877	1097	203	204	214	282	245	244	193	189	na	na	na	na	na	na	na	na	na
D144K	na	na	na	na	na	na	na	na	na	na	2086	1637	901	413	57	327	693	470	616	457	na	na	na	na	na	na	na	na	na	na	2382	2519	638	491	555	658	754	651	445	451	na	na	na	na	na	na	na	na	na
D144L	na	na	na	na	na	na	na	na	na	na	5212	3670	2030	890	119	1047	2051	1161	1045	1263	na	na	na	na	na	na	na	na	na	na	4368	5714	1619	1129	1136	1469	1361	1247	922	961	na	na	na	na	na	na	na	na	na
D144M	na	na	na	na	na	na	na	na	na	na	1400	1089	588	200	33	154	333	226	259	310	na	na	na	na	na	na	na	na	na	na	1429	1573	385	342	599	473	407	310	281	248	na	na	na	na	na	na	na	na	na
D144N	na	na	na	na	na	na	na	na	na	na	1194	1022	582	243	45	361	486	297	568	494	na	na	na	na	na	na	na	na	na	na	1626	1675	352	366	348	504	523	475	401	422	na	na	na	na	na	na	na	na	na
D144P	na	na	na	na	na	na	na	na	na	na	2702	2118	1068	482	70	438	499	427	269	392	na	na	na	na	na	na	na	na	na	na	2646	2959	621	552	596	739	654	585	387	320	na	na	na	na	na	na	na	na	na
D144Q	na	na	na	na	na	na	na	na	na	na	1363	1041	582	240	43	180	357	375	299	396	na	na	na	na	na	na	na	na	na	na	1136	1672	334	349	320	465	437	401	347	324	na	na	na	na	na	na	na	na	na
D144R	na	na	na	na	na	na	na	na	na	na	1	2508	1240	592	84	521	1007	570	588	686	na	na	na	na	na	na	na	na	na	na	3484	3700	840	757	879	1090	947	755	609	551	na	na	na	na	na	na	na	na	na
D144S	na	na	na	na	na	na	na	na	na	na	2673	2034	1276	495	99	693	761	882	1018	941	na	na	na	na	na	na	na	na	na	na	42	3488	672	844	836	1037	1036	1014	922	917	na	na	na	na	na	na	na	na	na
D144T	na	na	na	na	na	na	na	na	na	na	1882	1221	694	337	49	395	716	598	253	507	na	na	na	na	na	na	na	na	na	na	1621	2283	506	464	474	598	618	626	488	506	na	na	na	na	na	na	na	na	na
D144V	na	na	na	na	na	na	na	na	na	na	3	1725	965	282	56	374	626	451	371	617	na	na	na	na	na	na	na	na	na	na	1927	2414	410	448	572	600	562	493	448	374	na	na	na	na	na	na	na	na	na
D144W	na	na	na	na	na	na	na	na	na	na	1612	1062	622	275	53	370	307	217	265	365	na	na	na	na	na	na	na	na	na	na	1529	1765	433	327	525	542	449	353	305	315	na	na	na	na	na	na	na	na	na
D144Y	na	na	na	na	na	na	na	na	na	na	4	480	320	113	22	159	173	152	128	178	na	na	na	na	na	na	na	na	na	na	648	858	191	172	141	180	181	150	111	120	na	na	na	na	na	na	na	na	na
D27*	579	na	74	8	7	13	na	na	21	1484	na	na	na	na	na	na	na	na	na	na	701	104	35	57	21	21	89	18	35	115	na	na	na	na	na	na	na	na	na	na	206	60	34	16	12	66	14	16	na
D27A	208	12	139	20	na	na	6	12	70	215	na	na	na	na	na	na	na	na	na	na	388	18	13	11	na	na	9	na	na	na	na	na	na	na	na	na	na	na	na	na	40	8	9	6	na	8	na	na	na
D27C	376	na	364	26	24	26	na	22	na	126	na	na	na	na	na	na	na	na	na	na	694	134	56	48	50	16	27	7	na	11	na	na	na	na	na	na	na	na	na	na	408	110	83	51	37	15	41	25	22
D27E	na	na	na	na	na	na	10	na	19	na	na	na	na	na	na	na	na	na	na	na	na	na	na	na	na	na	na	na	na	na	na	na	na	na	na	na	na	na	na	na	na	na	na	na	na	na	na	na	na
D27F	215	na	40	na	7	na	na	na	na	na	na	na	na	na	na	na	na	na	na	na	455	70	26	11	12	23	na	7	12	na	na	na	na	na	na	na	na	na	na	na	163	46	12	na	7	na	11	8	na
D27G	1072	na	224	22	27	na	15	24	17	216	na	na	na	na	na	na	na	na	na	na	1879	315	106	78	116	50	77	28	54	47	na	na	na	na	na	na	na	na	na	na	579	171	45	45	69	58	38	26	14
D27H	156	na	12	na	na	na	na	na	na	na	na	na	na	na	na	na	na	na	na	na	229	18	12	11	11	na	na	na	na	na	na	na	na	na	na	na	na	na	na	na	115	24	na	na	na	na	na	na	na
D27I	na	na	41	na	na	na	na	16	na	45	na	na	na	na	na	na	na	na	na	na	315	46	17	14	17	11	12	na	na	12	na	na	na	na	na	na	na	na	na	na	107	20	na	6	na	9	na	na	na
D27K	908	na	90	na	13	15	na	21	na	na	na	na	na	na	na	na	na	na	na	na	1068	145	41	27	31	23	106	12	29	na	na	na	na	na	na	na	na	na	na	na	232	83	39	19	51	na	21	16	7
D27L	1321	na	200	10	11	na	33	na	na	na	na	na	na	na	na	na	na	na	na	na	1579	242	97	86	84	34	45	30	8	49	na	na	na	na	na	na	na	na	na	na	325	143	21	37	41	36	22	12	na
D27M	682	na	91	14	7	na	14	na	na	na	na	na	na	na	na	na	na	na	na	na	633	74	32	37	45	9	23	9	34	40	na	na	na	na	na	na	na	na	na	na	243	44	17	14	15	24	na	10	9
D27N	693	na	83	9	na	26	na	12	na	na	na	na	na	na	na	na	na	na	na	na	457	47	23	20	na	9	38	na	39	9	na	na	na	na	na	na	na	na	na	na	174	54	na	16	19	15	na	na	na
D27P	127	na	53	na	na	na	na	na	na	na	na	na	na	na	na	na	na	na	na	na	278	35	8	8	15	na	22	na	na	na	na	na	na	na	na	na	na	na	na	na	57	34	na	na	na	17	na	7	na
D27Q	325	na	83	na	na	na	na	na	na	na	na	na	na	na	na	na	na	na	na	na	408	65	na	na	na	9	na	na	22	na	na	na	na	na	na	na	na	na	na	na	152	64	na	9	na	7	na	na	11
D27R	1359	na	56	15	23	na	37	na	na	69	na	na	na	na	na	na	na	na	na	na	1502	185	64	40	61	45	73	11	na	na	na	na	na	na	na	na	na	na	na	na	376	130	34	25	45	60	22	14	na
D27S	14	na	173	6	8	17	na	na	26	79	na	na	na	na	na	na	na	na	na	na	837	114	48	na	37	9	140	7	34	99	na	na	na	na	na	na	na	na	na	na	332	77	7	23	na	14	12	8	30
D27T	468	na	76	5	6	na	15	na	na	na	na	na	na	na	na	na	na	na	na	na	442	71	19	19	34	na	38	na	24	15	na	na	na	na	na	na	na	na	na	na	193	32	14	9	11	13	12	na	na
D27V	894	na	74	na	na	15	na	na	9	81	na	na	na	na	na	na	na	na	na	na	970	139	37	39	47	26	74	16	28	na	na	na	na	na	na	na	na	na	na	na	242	93	13	25	18	8	30	23	22
D27W	559	na	87	8	11	20	32	21	5	38	na	na	na	na	na	na	na	na	na	na	794	116	40	52	38	30	23	13	na	39	na	na	na	na	na	na	na	na	na	na	299	45	33	10	na	na	15	13	17
D27Y	433	na	46	5	6	na	na	na	na	na	na	na	na	na	na	na	na	na	na	na	350	30	10	na	11	8	na	na	11	na	na	na	na	na	na	na	na	na	na	na	96	13	6	6	na	na	na	na	na
D69*	na	na	na	na	na	na	na	na	na	na	33	45	14	21	na	na	na	na	na	na	303	66	25	13	39	13	na	14	na	15	na	na	na	na	na	na	na	na	na	na	134	37	13	63	33	na	9	14	na
D69A	na	na	na	na	na	na	na	na	na	na	217	2058	1037	1657	118	810	622	1082	1055	3371	1125	1313	808	633	695	603	631	571	822	848	na	na	na	na	na	na	na	na	na	na	1033	1444	499	451	637	443	748	732	524
D69C	na	na	na	na	na	na	na	na	na	na	42	496	129	168	18	81	131	196	461	240	380	459	246	207	232	207	229	201	236	417	na	na	na	na	na	na	na	na	na	na	368	434	122	153	218	192	247	233	227
D69E	na	na	na	na	na	na	na	na	na	na	19	33	23	21	17	14	na	10	23	18	na	9	na	na	na	na	na	na	na	10	na	na	na	na	na	na	na	na	na	na	20	16	na	na	9	na	na	na	na
D69F	na	na	na	na	na	na	na	na	na	na	83	951	251	429	35	203	378	342	200	463	713	1035	524	395	517	510	773	441	415	456	na	na	na	na	na	na	na	na	na	na	690	929	300	358	491	555	467	459	399
D69G	na	na	na	na	na	na	na	na	na	na	658	8648	2681	2564	310	2832	2921	2786	3505	3891	14	8054	4056	3462	3612	3760	4253	3374	4679	5089	na	na	na	na	na	na	na	na	na	na	5943	7259	2347	2414	3605	3124	3642	3629	3333
D69H	na	na	na	na	na	na	na	na	na	na	138	1860	21	220	14	156	7	43	253	17	1821	1844	na	na	na	na	na	na	na	na	na	na	na	na	na	na	na	na	na	na	1266	1664	na	na	7	na	na	na	na
D69I	na	na	na	na	na	na	na	na	na	na	115	1435	474	522	40	339	628	414	472	504	1537	1582	762	737	732	712	727	660	652	839	na	na	na	na	na	na	na	na	na	na	1047	1447	486	522	775	584	749	699	592
D69K	na	na	na	na	na	na	na	na	na	na	358	3876	1384	1349	149	1259	1222	856	994	1152	4480	4057	2334	1828	2026	1870	2182	1474	1498	2082	na	na	na	na	na	na	na	na	na	na	3387	3959	1434	1418	2338	1778	1964	1805	1356
D69L	na	na	na	na	na	na	na	na	na	na	450	5555	1771	1603	227	2592	1779	1550	1738	2182	4801	5530	2740	2587	2841	2831	3901	2445	3111	2965	na	na	na	na	na	na	na	na	na	na	3930	5100	1971	1907	2818	2658	2737	2573	2139
D69M	na	na	na	na	na	na	na	na	na	na	157	1585	600	425	87	474	693	589	573	506	1705	1646	897	945	831	875	1278	595	789	640	na	na	na	na	na	na	na	na	na	na	1315	1636	602	619	882	968	864	752	599
D69N	na	na	na	na	na	na	na	na	na	na	294	3267	77	709	79	562	887	514	506	414	4124	3856	867	662	577	780	1135	845	1280	696	na	na	na	na	na	na	na	na	na	na	2628	3725	878	567	877	914	778	879	637
D69P	na	na	na	na	na	na	na	na	na	na	735	8630	3024	2911	352	3277	3741	2753	2467	3329	8494	8780	4676	4006	4579	4193	5474	3752	5019	5620	na	na	na	na	na	na	na	na	na	na	6193	8292	2972	3139	4858	4225	4296	4185	3670
D69Q	na	na	na	na	na	na	na	na	na	na	148	1904	631	538	61	491	491	517	552	654	1611	1831	1019	792	1060	872	1211	734	926	847	na	na	na	na	na	na	na	na	na	na	1324	1826	628	694	802	1065	1010	813	719
D69R	na	na	na	na	na	na	na	na	na	na	368	3877	1330	1231	170	1186	1154	1077	943	1277	4289	3879	2034	1924	1964	1738	2026	1499	1863	1909	na	na	na	na	na	na	na	na	na	na	2742	3471	1422	1272	1876	1695	1828	1739	1289
D69S	na	na	na	na	na	na	na	na	na	na	213	2773	867	847	102	912	1048	1060	1529	1367	2836	2820	1406	1289	1302	1305	1273	1218	1706	1715	na	na	na	na	na	na	na	na	na	na	1855	2573	1078	948	1334	1182	1343	1378	1188
D69T	na	na	na	na	na	na	na	na	na	na	372	4451	1366	1280	202	1527	1491	1374	1496	1744	4737	4238	2261	1886	2151	2010	2817	1788	2022	2164	na	na	na	na	na	na	na	na	na	na	3145	3909	1490	1422	2231	1806	2097	2067	1732
D69V	na	na	na	na	na	na	na	na	na	na	269	3245	1105	1074	133	914	961	1050	940	1214	3845	3322	1729	1536	1675	1607	2017	1463	1605	1765	na	na	na	na	na	na	na	na	na	na	2531	2954	1093	1128	1604	1521	1518	1593	1373
D69W	na	na	na	na	na	na	na	na	na	na	119	1403	443	458	61	575	345	507	350	523	1326	1515	779	684	684	747	758	626	744	745	na	na	na	na	na	na	na	na	na	na	973	1436	573	487	833	720	669	659	546
D69Y	na	na	na	na	na	na	na	na	na	na	6	7	na	5	5	na	na	na	16	14	na	8	8	13	na	na	na	13	25	na	na	na	na	na	na	na	na	na	na	na	5	na	na	na	na	na	na	na	na
D70*	na	na	na	na	na	na	na	na	na	na	43	56	21	11	3	4	na	20	16	na	406	78	32	65	32	28	44	16	na	na	na	na	na	na	na	na	na	na	na	na	274	56	7	7	29	na	20	13	na
D70A	na	na	na	na	na	na	na	na	na	na	281	3757	8830	4354	198	1097	1624	4671	6682	8338	1776	2020	1039	985	949	943	817	986	1074	1563	na	na	na	na	na	na	na	na	na	na	1051	1745	553	625	927	854	901	1039	849
D70C	na	na	na	na	na	na	na	na	na	na	68	1017	305	332	39	290	277	483	691	434	831	769	469	338	423	423	456	400	520	574	na	na	na	na	na	na	na	na	na	na	572	794	268	264	389	438	429	473	398
D70E	na	na	na	na	na	na	na	na	na	na	33	203	151	36	17	38	135	89	190	114	103	105	18	32	na	17	31	32	61	61	na	na	na	na	na	na	na	na	na	na	161	77	21	32	na	18	22	17	31
D70F	na	na	na	na	na	na	na	na	na	na	170	2147	667	662	88	733	1079	742	821	999	2052	1992	1140	976	1094	1016	1183	1013	1243	1419	na	na	na	na	na	na	na	na	na	na	1453	1887	707	737	1014	1151	969	1041	1004
D70G	na	na	na	na	na	na	na	na	na	na	682	8788	3081	3022	352	3873	3594	2806	3937	3765	7094	8337	4478	3683	4003	4070	4921	3709	4379	5139	na	na	na	na	na	na	na	na	na	na	5995	7642	2664	2676	4190	3893	3960	4042	3409
D70H	na	na	na	na	na	na	na	na	na	na	173	2682	727	788	104	920	907	1011	1104	1302	1790	2169	1246	985	1020	986	1431	1024	1603	1547	na	na	na	na	na	na	na	na	na	na	1548	1868	684	717	1046	1010	1070	1080	1045
D70I	na	na	na	na	na	na	na	na	na	na	117	1877	595	585	66	653	1035	785	827	832	1222	1837	944	848	847	915	1314	796	1145	1223	na	na	na	na	na	na	na	na	na	na	1265	1656	513	531	1067	810	989	853	801
D70K	na	na	na	na	na	na	na	na	na	na	340	4613	1478	1399	207	1528	2156	1837	2098	2363	3372	4177	2341	1758	2148	2202	3173	2049	2503	2751	na	na	na	na	na	na	na	na	na	na	2633	3868	1507	1238	2146	2075	2161	2076	1883
D70L	na	na	na	na	na	na	na	na	na	na	821	11245	3622	3700	474	4442	5609	4726	6377	6541	10247	10583	5744	4440	5255	5485	5906	5145	6753	7675	na	na	na	na	na	na	na	na	na	na	7024	10057	3663	3707	5545	5579	5635	5550	5287
D70M	na	na	na	na	na	na	na	na	na	na	277	3799	1084	1373	159	1359	1523	1498	1616	2014	3761	3486	1911	1590	1643	1812	2188	1541	2390	2518	na	na	na	na	na	na	na	na	na	na	2391	3287	1125	1158	1687	1263	1834	1693	1658
D70N	na	na	na	na	na	na	na	na	na	na	235	3118	928	936	113	1073	1115	1243	1372	1571	2268	2856	1515	1542	1468	1431	1589	1334	2115	1987	na	na	na	na	na	na	na	na	na	na	1817	2647	1059	1021	1361	1376	1446	1456	1456
D70P	na	na	na	na	na	na	na	na	na	na	369	5397	1667	1515	232	1667	2754	2596	3256	3357	4442	4583	2371	2159	2437	2392	2700	2412	3113	3952	na	na	na	na	na	na	na	na	na	na	3132	4589	1588	1525	2511	2157	2531	2683	2599
D70Q	na	na	na	na	na	na	na	na	na	na	176	2623	909	868	114	866	1299	1068	1179	1595	2866	2605	1501	1412	1245	1172	1710	1215	1479	1805	na	na	na	na	na	na	na	na	na	na	1526	2307	914	877	1217	1076	1347	1327	1184
D70R	na	na	na	na	na	na	na	na	na	na	517	7924	2411	2555	312	2416	3095	2739	2775	3924	6626	6316	3431	3075	3285	3076	3792	3042	3759	4959	na	na	na	na	na	na	na	na	na	na	4553	6251	2151	2252	3280	3277	3152	3244	3012
D70S	na	na	na	na	na	na	na	na	na	na	338	4459	1360	1448	170	1286	2450	1399	1932	2437	4035	4112	2175	1812	1966	1956	2489	1950	2617	2938	na	na	na	na	na	na	na	na	na	na	2593	3707	1445	1292	2439	1910	2073	2074	2067
D70T	na	na	na	na	na	na	na	na	na	na	207	3131	1023	918	132	929	984	1392	1595	1884	2404	2632	1256	1133	1184	1201	1757	1401	1755	1988	na	na	na	na	na	na	na	na	na	na	1721	2432	914	841	1440	1078	1523	1534	1422
D70V	na	na	na	na	na	na	na	na	na	na	305	4192	1372	1420	167	1318	1976	1576	1785	2053	3355	3836	1977	1969	1918	2045	2539	1708	2367	2376	na	na	na	na	na	na	na	na	na	na	2703	3488	1324	1351	1914	1352	2017	1871	1690
D70W	na	na	na	na	na	na	na	na	na	na	295	3673	1250	1129	145	1649	1149	1337	857	1402	2808	3611	1808	1498	1798	1845	2042	1436	1950	1954	na	na	na	na	na	na	na	na	na	na	2839	3371	1160	1112	1784	1574	1676	1614	1372
D70Y	na	na	na	na	na	na	na	na	na	na	115	1330	472	386	68	290	719	540	620	850	1261	1374	760	605	712	685	590	622	884	911	na	na	na	na	na	na	na	na	na	na	963	1286	438	442	768	657	755	698	561
D79*	na	na	na	na	na	na	na	na	na	na	28	25	na	na	na	6	9	na	na	na	265	25	na	na	na	na	na	na	na	10	na	na	na	na	na	na	na	na	na	na	183	51	na	na	na	na	na	na	na
D79A	na	na	na	na	na	na	na	na	na	na	200	2487	953	659	107	727	932	909	859	1135	2293	2264	1187	989	1129	1063	1309	1056	1175	1226	na	na	na	na	na	na	na	na	na	na	1564	2309	898	675	1068	1038	1091	1120	1027
D79C	na	na	na	na	na	na	na	na	na	na	77	807	284	239	53	282	223	222	346	306	784	889	422	312	403	364	318	324	356	378	na	na	na	na	na	na	na	na	na	na	605	783	222	249	394	399	351	376	285
D79E	na	na	na	na	na	na	na	na	na	na	33	108	6	18	23	45	62	44	25	38	na	70	20	12	na	na	31	7	56	94	na	na	na	na	na	na	na	na	na	na	53	40	na	12	na	57	na	19	19
D79F	na	na	na	na	na	na	na	na	na	na	260	3269	1096	1054	148	951	1278	1070	1168	1305	3946	3524	1779	1433	1648	1690	1877	1439	1581	1610	na	na	na	na	na	na	na	na	na	na	2437	3112	1132	1065	1477	1759	1563	1549	1158
D79G	na	na	na	na	na	na	na	na	na	na	329	4323	1500	1277	174	1472	1833	1224	1664	1839	4600	3965	2119	1905	2129	1924	2076	1878	1906	2271	na	na	na	na	na	na	na	na	na	na	3055	4062	1310	1422	2032	1806	1970	1879	1669
D79H	na	na	na	na	na	na	na	na	na	na	164	2038	718	716	80	780	884	541	762	995	2559	1908	1024	798	839	1031	1264	877	960	1361	na	na	na	na	na	na	na	na	na	na	1231	1780	627	569	826	774	950	1064	865
D79I	na	na	na	na	na	na	na	na	na	na	119	1313	445	602	66	415	637	507	368	611	1215	1404	616	580	659	602	821	642	780	934	na	na	na	na	na	na	na	na	na	na	917	1209	495	478	642	689	630	721	592
D79K	na	na	na	na	na	na	na	na	na	na	408	5356	1958	1913	178	1584	2130	1555	1963	2140	4412	4963	2527	2157	2546	2460	2662	2295	2597	2705	na	na	na	na	na	na	na	na	na	na	3955	4969	1751	1616	2487	2118	2759	2354	2097
D79L	na	na	na	na	na	na	na	na	na	na	564	7131	2659	2265	286	2197	2668	2243	2385	2708	8273	7223	3789	3129	3586	3231	4504	3163	3439	3541	na	na	na	na	na	na	na	na	na	na	5293	6817	2360	2355	3517	3191	3598	3214	2860
D79M	na	na	na	na	na	na	na	na	na	na	136	1982	712	623	82	609	909	418	435	666	1532	1855	1034	909	913	825	981	693	806	1023	na	na	na	na	na	na	na	na	na	na	1366	1711	659	659	843	917	877	775	718
D79N	na	na	na	na	na	na	na	na	na	na	329	4171	1383	1248	188	1264	1504	1776	1549	2111	3559	4123	2103	1935	2100	1928	2342	2007	2587	2531	na	na	na	na	na	na	na	na	na	na	2852	3775	1363	1346	2159	1690	2144	2041	1883
D79P	na	na	na	na	na	na	na	na	na	na	750	10427	3463	3444	433	3663	4809	3881	3991	5185	8	9642	4940	4364	4676	4482	6397	4524	6042	6411	na	na	na	na	na	na	na	na	na	na	6905	9283	3351	3244	5016	4824	4677	5023	4384
D79Q	na	na	na	na	na	na	na	na	na	na	117	1714	622	693	74	631	699	708	662	778	1705	1882	970	900	936	822	1295	814	952	1043	na	na	na	na	na	na	na	na	na	na	1117	1795	611	575	919	925	852	771	690
D79R	na	na	na	na	na	na	na	na	na	na	493	5716	1947	2061	247	1732	3007	2022	1956	2487	4904	5588	2922	2436	2442	2541	2880	2486	3071	3275	na	na	na	na	na	na	na	na	na	na	3820	5333	1806	1844	2842	2380	2652	2652	2397
D79S	na	na	na	na	na	na	na	na	na	na	484	6387	2180	2150	263	2229	2707	2561	3014	3019	5505	6175	3259	2813	3071	2888	3265	2757	3744	3904	na	na	na	na	na	na	na	na	na	na	4824	6101	2056	2075	2932	2646	3189	3170	2702
D79T	na	na	na	na	na	na	na	na	na	na	368	5108	1735	1561	221	1755	2088	1919	2263	3096	5514	4771	2399	2009	2354	2253	2890	2259	3331	3220	na	na	na	na	na	na	na	na	na	na	3020	4473	1655	1462	2382	2177	2365	2350	2337
D79V	na	na	na	na	na	na	na	na	na	na	307	3257	1189	626	122	986	1381	1320	1620	705	3371	3383	1987	1606	1629	1624	1940	1466	1630	1819	na	na	na	na	na	na	na	na	na	na	2607	3140	1170	1043	1652	1485	1522	1447	1220
D79W	na	na	na	na	na	na	na	na	na	na	275	3227	1126	952	114	975	1043	901	1235	1314	3969	3439	1629	1530	1661	1597	2024	1409	2050	1566	na	na	na	na	na	na	na	na	na	na	2327	3099	1089	1129	1675	1470	1502	1485	1216
D79Y	na	na	na	na	na	na	na	na	na	na	127	1611	632	918	82	615	863	694	765	684	1810	1567	755	719	786	827	1128	764	998	857	na	na	na	na	na	na	na	na	na	na	1223	1706	609	572	831	861	890	783	750
D87*	463	79	na	14	10	na	na	15	na	na	na	na	na	na	na	na	na	na	na	na	na	na	na	na	na	na	na	na	na	na	163	na	na	na	na	na	na	na	na	na	na	na	na	na	na	na	na	na	na
D87A	623	828	na	390	411	395	455	460	634	3130	na	na	na	na	na	na	na	na	na	na	na	na	na	na	na	na	na	na	na	na	1117	1273	247	198	212	248	244	319	319	325	na	na	na	na	na	na	na	na	na
D87C	798	1057	na	541	580	475	626	483	658	3874	na	na	na	na	na	na	na	na	na	na	na	na	na	na	na	na	na	na	na	na	1598	1256	301	302	338	420	346	481	346	362	na	na	na	na	na	na	na	na	na
D87E	48	47	6	na	8	65	22	7	7	38	na	na	na	na	na	na	na	na	na	na	na	na	na	na	na	na	na	na	na	na	17	20	11	5	na	6	na	na	na	na	na	na	na	na	na	na	na	na	na
D87F	3412	5544	na	2584	3071	3718	3988	3664	3416	25654	na	na	na	na	na	na	na	na	na	na	na	na	na	na	na	na	na	na	na	na	5481	5443	689	608	627	869	997	1146	1083	946	na	na	na	na	na	na	na	na	na
D87G	3151	3534	na	1810	2371	1981	2675	2775	1905	18257	na	na	na	na	na	na	na	na	na	na	na	na	na	na	na	na	na	na	na	na	6021	4559	1548	1496	1765	2004	2244	2446	2222	2452	na	na	na	na	na	na	na	na	na
D87H	12	42	na	na	na	33	na	na	na	189	na	na	na	na	na	na	na	na	na	na	na	na	na	na	na	na	na	na	na	na	12	9	na	na	13	na	na	na	na	na	na	na	na	na	na	na	na	na	na
D87I	935	1278	na	630	795	750	953	882	877	5658	na	na	na	na	na	na	na	na	na	na	na	na	na	na	na	na	na	na	na	na	1811	1678	305	253	370	354	427	557	477	408	na	na	na	na	na	na	na	na	na
D87K	3031	4512	na	1982	2568	2096	2552	2564	2215	21343	na	na	na	na	na	na	na	na	na	na	na	na	na	na	na	na	na	na	na	na	7378	7092	2203	1869	2554	2507	2574	2986	2707	2814	na	na	na	na	na	na	na	na	na
D87L	6258	8668	na	4126	5172	5554	5813	6206	5355	42260	na	na	na	na	na	na	na	na	na	na	na	na	na	na	na	na	na	na	na	na	11233	10361	2414	2022	2333	2921	3050	3597	3124	3081	na	na	na	na	na	na	na	na	na
D87M	1449	2026	na	896	1162	1101	1183	1528	1130	10049	na	na	na	na	na	na	na	na	na	na	na	na	na	na	na	na	na	na	na	na	3000	2803	901	732	1039	906	1024	1071	994	1073	na	na	na	na	na	na	na	na	na
D87N	na	129	na	na	na	5	10	22	22	na	na	na	na	na	na	na	na	na	na	na	na	na	na	na	na	na	na	na	na	na	59	38	na	na	na	na	na	na	na	na	na	na	na	na	na	na	na	na	na
D87P	4874	6953	na	3345	4137	4347	4605	6037	4527	33695	na	na	na	na	na	na	na	na	na	na	na	na	na	na	na	na	na	na	na	na	11136	9953	3225	2712	2734	3330	3627	3957	3989	4033	na	na	na	na	na	na	na	na	na
D87Q	1219	1792	na	913	1186	984	1295	1430	988	8310	na	na	na	na	na	na	na	na	na	na	na	na	na	na	na	na	na	na	na	na	2777	1913	722	621	802	842	874	1098	1141	1039	na	na	na	na	na	na	na	na	na
D87R	4695	6709	na	2910	3804	3376	4027	3648	3122	24386	na	na	na	na	na	na	na	na	na	na	na	na	na	na	na	na	na	na	na	na	10450	9	2690	2747	2577	3605	3415	3848	3484	3628	na	na	na	na	na	na	na	na	na
D87S	3071	4595	na	2061	2491	2746	2871	3104	2297	17958	na	na	na	na	na	na	na	na	na	na	na	na	na	na	na	na	na	na	na	na	6424	4495	1523	1463	1520	1676	1762	2094	1907	1904	na	na	na	na	na	na	na	na	na
D87T	1734	2760	na	1356	1750	1642	1802	2179	1689	13607	na	na	na	na	na	na	na	na	na	na	na	na	na	na	na	na	na	na	na	na	4511	4111	1152	1040	1389	1352	1507	1777	1446	1561	na	na	na	na	na	na	na	na	na
D87V	1630	1934	na	1077	1240	958	1440	1037	1059	10252	na	na	na	na	na	na	na	na	na	na	na	na	na	na	na	na	na	na	na	na	3255	2563	612	627	836	667	682	813	586	603	na	na	na	na	na	na	na	na	na
D87W	1201	1916	na	829	1159	1062	1177	1249	929	12047	na	na	na	na	na	na	na	na	na	na	na	na	na	na	na	na	na	na	na	na	2991	2752	720	659	832	869	1003	1093	1001	950	na	na	na	na	na	na	na	na	na
D87Y	na	8	na	6	na	na	na	na	16	113	na	na	na	na	na	na	na	na	na	na	na	na	na	na	na	na	na	na	na	na	9	na	na	na	na	na	na	na	na	na	na	na	na	na	na	na	na	na	na
E101*	598	44	6	na	17	11	na	na	na	na	na	na	na	na	na	na	na	na	na	na	na	na	na	na	na	na	na	na	na	na	280	na	na	5	56	na	na	na	na	6	na	na	na	na	na	na	na	na	na
E101A	2862	4225	na	1812	2383	2108	2337	2097	1847	14994	na	na	na	na	na	na	na	na	na	na	na	na	na	na	na	na	na	na	na	na	6695	5666	1389	1550	2186	1799	1785	2275	1891	2000	na	na	na	na	na	na	na	na	na
E101C	1160	1818	na	811	936	773	867	902	701	6802	na	na	na	na	na	na	na	na	na	na	na	na	na	na	na	na	na	na	na	na	2175	1292	420	289	683	462	543	502	447	339	na	na	na	na	na	na	na	na	na
E101D	6	10	7	na	na	na	na	7	5	na	na	na	na	na	na	na	na	na	na	na	na	na	na	na	na	na	na	na	na	na	na	na	na	na	na	na	na	na	na	na	na	na	na	na	na	na	na	na	na
E101F	2948	3875	na	1835	2289	2439	2020	2126	2004	19886	na	na	na	na	na	na	na	na	na	na	na	na	na	na	na	na	na	na	na	na	1173	996	98	118	98	88	75	76	172	164	na	na	na	na	na	na	na	na	na
E101G	7441	10679	na	4936	6236	6439	7185	7434	7222	52285	na	na	na	na	na	na	na	na	na	na	na	na	na	na	na	na	na	na	na	na	19114	16172	6142	5866	6019	6928	7165	8444	7422	8371	na	na	na	na	na	na	na	na	na
E101H	1724	1932	na	851	1124	1029	1152	1484	968	9492	na	na	na	na	na	na	na	na	na	na	na	na	na	na	na	na	na	na	na	na	2036	1849	239	250	209	237	370	433	361	369	na	na	na	na	na	na	na	na	na
E101I	1288	2048	na	821	1017	1235	1071	859	939	7026	na	na	na	na	na	na	na	na	na	na	na	na	na	na	na	na	na	na	na	na	2710	2152	443	415	408	610	548	562	481	410	na	na	na	na	na	na	na	na	na
E101K	3256	3369	na	1659	2118	2139	2488	2152	1991	15308	na	na	na	na	na	na	na	na	na	na	na	na	na	na	na	na	na	na	na	na	6245	5340	1749	1634	1644	2011	2077	2260	1901	1939	na	na	na	na	na	na	na	na	na
E101L	8931	10240	na	4835	6215	6226	6663	7788	5208	53031	na	na	na	na	na	na	na	na	na	na	na	na	na	na	na	na	na	na	na	na	9771	7513	1317	1076	1397	1669	1907	2047	1678	1535	na	na	na	na	na	na	na	na	na
E101M	1713	2887	na	1114	1381	1257	1615	1482	1602	10653	na	na	na	na	na	na	na	na	na	na	na	na	na	na	na	na	na	na	na	na	3830	3096	822	702	1001	1306	1229	1335	1038	1035	na	na	na	na	na	na	na	na	na
E101N	2011	2910	na	1161	1565	1483	2479	1705	1447	10913	na	na	na	na	na	na	na	na	na	na	na	na	na	na	na	na	na	na	na	na	3745	3519	661	548	554	808	872	826	775	705	na	na	na	na	na	na	na	na	na
E101P	9562	11436	na	3702	3754	2710	2270	1782	1168	7638	na	na	na	na	na	na	na	na	na	na	na	na	na	na	na	na	na	na	na	na	13518	10927	1855	1357	1714	1782	1815	1585	933	775	na	na	na	na	na	na	na	na	na
E101Q	1570	2031	na	800	1108	700	1316	934	1249	9080	na	na	na	na	na	na	na	na	na	na	na	na	na	na	na	na	na	na	na	na	2575	2466	777	523	692	820	755	1030	866	796	na	na	na	na	na	na	na	na	na
E101R	5386	7161	na	3254	4324	4769	4281	4828	3932	35174	na	na	na	na	na	na	na	na	na	na	na	na	na	na	na	na	na	na	na	na	11948	9846	3531	3194	3493	4038	4364	5016	4376	4424	na	na	na	na	na	na	na	na	na
E101S	5188	7092	na	3091	3810	3836	4355	4344	3462	29398	na	na	na	na	na	na	na	na	na	na	na	na	na	na	na	na	na	na	na	na	6636	5436	1459	1394	1441	1764	2039	1987	1727	1894	na	na	na	na	na	na	na	na	na
E101T	3334	4393	na	1945	2298	4816	2518	2131	2125	13682	na	na	na	na	na	na	na	na	na	na	na	na	na	na	na	na	na	na	na	na	7489	7956	2006	1435	1839	2199	2350	2161	1796	1686	na	na	na	na	na	na	na	na	na
E101V	3972	5244	na	2121	2899	2950	3103	2622	2090	18667	na	na	na	na	na	na	na	na	na	na	na	na	na	na	na	na	na	na	na	na	7082	6557	1527	1226	1473	1647	1733	2012	1581	1571	na	na	na	na	na	na	na	na	na
E101W	2021	3419	na	1506	1945	1581	1852	1789	1867	15856	na	na	na	na	na	na	na	na	na	na	na	na	na	na	na	na	na	na	na	na	4447	3239	885	664	930	1213	1233	1341	1110	922	na	na	na	na	na	na	na	na	na
E101Y	1204	1495	na	527	537	661	635	855	498	5094	na	na	na	na	na	na	na	na	na	na	na	na	na	na	na	na	na	na	na	na	911	618	na	na	na	na	na	na	na	na	na	na	na	na	na	na	na	na	na
E118*	73	67	na	na	na	na	na	na	na	na	na	na	na	na	na	na	na	na	na	na	na	na	na	na	na	na	na	na	na	na	114	na	na	na	na	na	na	na	na	na	na	na	na	na	na	na	na	na	na
E118A	998	1549	na	755	1117	833	1185	1030	1032	11035	na	na	na	na	na	na	na	na	na	na	na	na	na	na	na	na	na	na	na	na	2178	15	724	638	3985	916	956	1154	1189	1186	na	na	na	na	na	na	na	na	na
E118C	36	18	na	31	41	55	53	51	26	406	na	na	na	na	na	na	na	na	na	na	na	na	na	na	na	na	na	na	na	na	78	48	11	49	15	34	32	42	34	43	na	na	na	na	na	na	na	na	na
E118D	5	na	na	na	na	na	8	na	na	na	na	na	na	na	na	na	na	na	na	na	na	na	na	na	na	na	na	na	na	na	na	na	na	na	na	na	na	na	na	na	na	na	na	na	na	na	na	na	na
E118F	124	190	na	75	145	122	178	209	149	999	na	na	na	na	na	na	na	na	na	na	na	na	na	na	na	na	na	na	na	na	329	158	116	143	115	135	178	87	154	145	na	na	na	na	na	na	na	na	na
E118G	2293	3054	na	1590	2228	2017	2491	2817	2380	19573	na	na	na	na	na	na	na	na	na	na	na	na	na	na	na	na	na	na	na	na	4912	4210	1568	1491	1828	2237	2223	2720	2565	2617	na	na	na	na	na	na	na	na	na
E118H	120	243	na	53	47	86	66	100	64	1094	na	na	na	na	na	na	na	na	na	na	na	na	na	na	na	na	na	na	na	na	153	71	na	na	na	na	7	8	33	28	na	na	na	na	na	na	na	na	na
E118I	594	946	na	437	620	589	775	577	628	5583	na	na	na	na	na	na	na	na	na	na	na	na	na	na	na	na	na	na	na	na	1309	1045	440	469	656	580	544	670	643	617	na	na	na	na	na	na	na	na	na
E118K	2064	3331	na	1672	2368	2485	2637	2666	2697	26940	na	na	na	na	na	na	na	na	na	na	na	na	na	na	na	na	na	na	na	na	4723	3018	1643	1716	1898	2260	2229	2784	2645	2882	na	na	na	na	na	na	na	na	na
E118L	1043	1887	na	878	1313	845	1226	1287	1436	9483	na	na	na	na	na	na	na	na	na	na	na	na	na	na	na	na	na	na	na	na	2744	2248	892	985	1215	1119	1287	1433	1371	1398	na	na	na	na	na	na	na	na	na
E118M	1265	1995	na	976	1258	1132	1487	1233	1350	10374	na	na	na	na	na	na	na	na	na	na	na	na	na	na	na	na	na	na	na	na	2731	1493	1114	856	1153	1177	1304	1411	1337	1553	na	na	na	na	na	na	na	na	na
E118N	679	1021	na	495	652	549	967	765	718	6845	na	na	na	na	na	na	na	na	na	na	na	na	na	na	na	na	na	na	na	na	1615	1221	439	476	1061	737	565	865	816	832	na	na	na	na	na	na	na	na	na
E118P	1051	1526	na	742	1074	726	1320	1200	1039	11390	na	na	na	na	na	na	na	na	na	na	na	na	na	na	na	na	na	na	na	na	2606	2936	869	670	885	1137	1181	1255	1429	1405	na	na	na	na	na	na	na	na	na
E118Q	50	101	na	24	8	34	73	47	50	158	na	na	na	na	na	na	na	na	na	na	na	na	na	na	na	na	na	na	na	na	136	7	na	na	na	na	na	na	na	29	na	na	na	na	na	na	na	na	na
E118R	1059	1694	na	829	1251	1279	1103	1523	1360	11451	na	na	na	na	na	na	na	na	na	na	na	na	na	na	na	na	na	na	na	na	2744	2916	1116	882	1086	1189	1313	1542	1488	1557	na	na	na	na	na	na	na	na	na
E118S	987	1097	na	538	694	533	742	890	921	7328	na	na	na	na	na	na	na	na	na	na	na	na	na	na	na	na	na	na	na	na	1694	1135	612	585	645	727	743	756	854	933	na	na	na	na	na	na	na	na	na
E118T	1474	2449	na	1258	1836	1466	2186	2362	2027	15442	na	na	na	na	na	na	na	na	na	na	na	na	na	na	na	na	na	na	na	na	3909	3520	1309	1124	1430	1724	1768	2108	1931	2044	na	na	na	na	na	na	na	na	na
E118V	2303	2741	na	1428	1956	1870	2526	1881	1675	14832	na	na	na	na	na	na	na	na	na	na	na	na	na	na	na	na	na	na	na	na	4179	3002	1679	1325	1629	1755	1777	1944	1987	2036	na	na	na	na	na	na	na	na	na
E118W	75	160	na	96	136	161	128	287	111	1236	na	na	na	na	na	na	na	na	na	na	na	na	na	na	na	na	na	na	na	na	366	349	113	243	127	149	137	196	148	163	na	na	na	na	na	na	na	na	na
E118Y	57	97	na	51	55	129	100	59	28	425	na	na	na	na	na	na	na	na	na	na	na	na	na	na	na	na	na	na	na	na	139	225	23	73	18	51	43	113	46	74	na	na	na	na	na	na	na	na	na
E120*	359	80	na	31	30	16	na	18	na	62	na	na	na	na	na	na	na	na	na	na	na	na	na	na	na	na	na	na	na	na	303	na	13	na	na	na	na	na	na	na	na	na	na	na	na	na	na	na	na
E120A	2027	3104	na	1035	1116	1514	912	690	802	4003	na	na	na	na	na	na	na	na	na	na	na	na	na	na	na	na	na	na	na	na	4457	4087	1214	1358	1077	1334	1305	1348	1051	970	na	na	na	na	na	na	na	na	na
E120C	322	253	na	175	202	267	202	220	162	1642	na	na	na	na	na	na	na	na	na	na	na	na	na	na	na	na	na	na	na	na	687	392	282	257	193	298	303	383	284	339	na	na	na	na	na	na	na	na	na
E120D	22	7	na	na	na	14	25	28	9	47	na	na	na	na	na	na	na	na	na	na	na	na	na	na	na	na	na	na	na	na	na	na	na	na	na	na	na	na	na	na	na	na	na	na	na	na	na	na	na
E120F	769	963	na	494	761	563	839	851	729	6169	na	na	na	na	na	na	na	na	na	na	na	na	na	na	na	na	na	na	na	na	2016	1473	642	643	769	823	989	1093	925	972	na	na	na	na	na	na	na	na	na
E120G	3569	5082	na	2542	3068	3220	3509	3518	3256	29903	na	na	na	na	na	na	na	na	na	na	na	na	na	na	na	na	na	na	na	na	9724	8358	3156	2806	3534	3836	4382	4630	4521	4851	na	na	na	na	na	na	na	na	na
E120H	1338	1922	na	799	1145	1550	1224	1225	1082	10252	na	na	na	na	na	na	na	na	na	na	na	na	na	na	na	na	na	na	na	na	3081	2262	849	847	1100	1234	1442	1601	1409	1501	na	na	na	na	na	na	na	na	na
E120I	1267	1596	na	654	962	850	1050	678	755	7618	na	na	na	na	na	na	na	na	na	na	na	na	na	na	na	na	na	na	na	na	2790	2006	856	794	796	1083	1185	1147	1150	1298	na	na	na	na	na	na	na	na	na
E120K	3108	4082	na	2159	3095	3010	3657	3945	3877	35032	na	na	na	na	na	na	na	na	na	na	na	na	na	na	na	na	na	na	na	na	7595	7489	2964	2704	3615	3508	4053	4446	4403	4692	na	na	na	na	na	na	na	na	na
E120L	6112	8289	na	3609	5141	5131	6236	5636	5313	43838	na	na	na	na	na	na	na	na	na	na	na	na	na	na	na	na	na	na	na	na	14202	19	5404	4483	5170	6186	6629	7504	7151	7243	na	na	na	na	na	na	na	na	na
E120M	1584	1931	na	964	1256	1460	1449	1507	1335	14758	na	na	na	na	na	na	na	na	na	na	na	na	na	na	na	na	na	na	na	na	3751	3094	1119	933	1191	1553	1821	1922	1904	1904	na	na	na	na	na	na	na	na	na
E120N	2307	3200	na	1553	2061	2355	2189	2704	2201	20619	na	na	na	na	na	na	na	na	na	na	na	na	na	na	na	na	na	na	na	na	5794	5885	1928	1827	1914	2442	2656	2887	3071	3032	na	na	na	na	na	na	na	na	na
E120P	4836	7933	na	2368	2683	2518	2073	1363	1298	9256	na	na	na	na	na	na	na	na	na	na	na	na	na	na	na	na	na	na	na	na	12308	9969	3271	3089	3149	3885	3702	3607	2572	2460	na	na	na	na	na	na	na	na	na
E120Q	1195	1840	na	900	1166	890	939	1193	1182	9974	na	na	na	na	na	na	na	na	na	na	na	na	na	na	na	na	na	na	na	na	3346	2503	1035	888	1246	1464	1449	1651	1431	1545	na	na	na	na	na	na	na	na	na
E120R	3169	4840	na	2576	3660	6538	4445	5198	4523	45325	na	na	na	na	na	na	na	na	na	na	na	na	na	na	na	na	na	na	na	na	8481	7106	2862	2826	3590	3899	4505	5481	5112	5414	na	na	na	na	na	na	na	na	na
E120S	3404	4631	na	1928	2320	2384	2188	2030	1820	17072	na	na	na	na	na	na	na	na	na	na	na	na	na	na	na	na	na	na	na	na	7797	7948	2517	2304	2328	3017	3185	3526	3116	3152	na	na	na	na	na	na	na	na	na
E120T	2835	4083	na	1891	2633	2959	2897	3069	2905	23193	na	na	na	na	na	na	na	na	na	na	na	na	na	na	na	na	na	na	na	na	7432	5755	2368	2155	2389	2919	3207	3494	3418	3786	na	na	na	na	na	na	na	na	na
E120V	3327	4859	na	1852	2699	2218	2679	2417	2051	17788	na	na	na	na	na	na	na	na	na	na	na	na	na	na	na	na	na	na	na	na	8428	7496	2311	2290	2884	3068	3228	3581	2917	3042	na	na	na	na	na	na	na	na	na
E120W	1558	2224	na	1073	1351	1192	1396	1585	1268	11850	na	na	na	na	na	na	na	na	na	na	na	na	na	na	na	na	na	na	na	na	4057	3089	1689	1366	1470	1716	1850	2244	1935	1992	na	na	na	na	na	na	na	na	na
E120Y	578	1359	na	582	753	869	662	715	763	7413	na	na	na	na	na	na	na	na	na	na	na	na	na	na	na	na	na	na	na	na	2007	1649	504	389	551	663	713	869	824	912	na	na	na	na	na	na	na	na	na
E129*	na	na	na	na	na	na	na	na	na	na	7	na	na	na	8	na	na	na	na	na	na	na	na	na	na	na	na	na	na	na	na	na	na	na	na	na	na	na	na	na	na	na	na	na	na	na	na	na	na
E129A	na	na	na	na	na	na	na	na	na	na	7	7	354	134	35	250	261	221	271	299	na	na	na	na	na	na	na	na	na	na	300	678	125	127	151	182	214	182	190	169	na	na	na	na	na	na	na	na	na
E129C	na	na	na	na	na	na	na	na	na	na	1	632	410	389	37	244	358	300	566	721	na	na	na	na	na	na	na	na	na	na	898	1048	272	266	291	383	373	490	398	395	na	na	na	na	na	na	na	na	na
E129D	na	na	na	na	na	na	na	na	na	na	19	na	39	10	10	8	na	na	na	na	na	na	na	na	na	na	na	na	na	na	na	na	na	na	na	na	na	na	na	na	na	na	na	na	na	na	na	na	na
E129F	na	na	na	na	na	na	na	na	na	na	2385	1881	1249	760	88	758	1157	1028	1144	1589	na	na	na	na	na	na	na	na	na	na	14	3394	836	885	997	1266	1285	1503	1394	1341	na	na	na	na	na	na	na	na	na
E129G	na	na	na	na	na	na	na	na	na	na	3445	3334	1230	186	86	593	1004	1072	1864	1404	na	na	na	na	na	na	na	na	na	na	3867	5200	297	351	387	416	562	582	802	792	na	na	na	na	na	na	na	na	na
E129H	na	na	na	na	na	na	na	na	na	na	1	1360	757	418	68	510	761	785	952	952	na	na	na	na	na	na	na	na	na	na	1543	1970	533	467	637	698	772	787	692	688	na	na	na	na	na	na	na	na	na
E129I	na	na	na	na	na	na	na	na	na	na	1025	821	547	266	45	342	339	398	639	538	na	na	na	na	na	na	na	na	na	na	973	1376	291	357	371	520	554	675	475	486	na	na	na	na	na	na	na	na	na
E129K	na	na	na	na	na	na	na	na	na	na	na	317	17	12	7	5	6	8	29	17	na	na	na	na	na	na	na	na	na	na	10	29	na	na	8	na	na	na	6	7	na	na	na	na	na	na	na	na	na
E129L	na	na	na	na	na	na	na	na	na	na	4961	4209	2772	1291	216	1395	2459	2064	2529	2655	na	na	na	na	na	na	na	na	na	na	4747	6443	1460	1451	1684	2057	2159	2295	2097	2049	na	na	na	na	na	na	na	na	na
E129M	na	na	na	na	na	na	na	na	na	na	1192	1202	651	270	46	405	446	516	539	698	na	na	na	na	na	na	na	na	na	na	1026	1459	330	268	378	550	484	514	568	550	na	na	na	na	na	na	na	na	na
E129N	na	na	na	na	na	na	na	na	na	na	2673	2452	1516	633	99	719	584	968	1065	1281	na	na	na	na	na	na	na	na	na	na	2604	3413	819	864	1069	1158	1264	1256	1072	1120	na	na	na	na	na	na	na	na	na
E129P	na	na	na	na	na	na	na	na	na	na	5023	4216	2790	1304	229	1604	2318	2465	2765	3015	na	na	na	na	na	na	na	na	na	na	39	6941	1718	1713	2719	2415	2632	2970	2474	2424	na	na	na	na	na	na	na	na	na
E129Q	na	na	na	na	na	na	na	na	na	na	3	na	15	na	8	na	na	na	na	10	na	na	na	na	na	na	na	na	na	na	16	na	na	na	na	na	na	na	na	na	na	na	na	na	na	na	na	na	na
E129R	na	na	na	na	na	na	na	na	na	na	3822	3104	2058	1180	157	1279	2133	1982	2127	2366	na	na	na	na	na	na	na	na	na	na	10	5065	1047	1349	1443	1803	2117	2106	1970	1999	na	na	na	na	na	na	na	na	na
E129S	na	na	na	na	na	na	na	na	na	na	1	1660	1223	591	92	738	1238	1044	1098	1208	na	na	na	na	na	na	na	na	na	na	2487	3011	722	718	824	1155	1143	1252	1144	1257	na	na	na	na	na	na	na	na	na
E129T	na	na	na	na	na	na	na	na	na	na	1662	1446	857	459	70	462	502	691	947	899	na	na	na	na	na	na	na	na	na	na	1498	2192	547	568	682	822	868	822	726	782	na	na	na	na	na	na	na	na	na
E129V	na	na	na	na	na	na	na	na	na	na	10	396	265	108	35	155	151	202	277	300	na	na	na	na	na	na	na	na	na	na	569	746	105	118	179	163	289	215	188	201	na	na	na	na	na	na	na	na	na
E129W	na	na	na	na	na	na	na	na	na	na	1440	1214	812	436	58	469	466	610	482	809	na	na	na	na	na	na	na	na	na	na	1133	1853	412	439	539	729	752	830	751	684	na	na	na	na	na	na	na	na	na
E129Y	na	na	na	na	na	na	na	na	na	na	1025	905	566	261	50	296	299	519	525	609	na	na	na	na	na	na	na	na	na	na	718	1146	193	241	266	276	364	416	358	388	na	na	na	na	na	na	na	na	na
E134*	na	na	na	na	na	na	na	na	na	na	25	126	52	37	22	75	31	25	31	74	na	na	na	na	na	na	na	na	na	na	11	17	8	na	6	8	6	11	na	9	na	na	na	na	na	na	na	na	na
E134A	na	na	na	na	na	na	na	na	na	na	1	2085	1213	598	92	783	725	1226	901	1339	na	na	na	na	na	na	na	na	na	na	2233	3138	629	688	797	960	1006	1069	968	1014	na	na	na	na	na	na	na	na	na
E134C	na	na	na	na	na	na	na	na	na	na	1212	921	672	208	43	276	476	651	647	663	na	na	na	na	na	na	na	na	na	na	11	1566	351	368	435	564	607	564	549	579	na	na	na	na	na	na	na	na	na
E134D	na	na	na	na	na	na	na	na	na	na	24	7	47	19	20	5	na	na	14	8	na	na	na	na	na	na	na	na	na	na	13	na	na	na	7	na	na	na	na	na	na	na	na	na	na	na	na	na	na
E134F	na	na	na	na	na	na	na	na	na	na	1	4585	3023	1375	206	1913	1958	2641	2516	3060	na	na	na	na	na	na	na	na	na	na	31	7911	2058	1811	2177	2796	2859	3007	2649	2829	na	na	na	na	na	na	na	na	na
E134G	na	na	na	na	na	na	na	na	na	na	5	10139	6755	3161	533	3477	5330	5335	5944	6910	na	na	na	na	na	na	na	na	na	na	87	17919	4095	4252	4514	5983	6216	6582	5871	5800	na	na	na	na	na	na	na	na	na
E134H	na	na	na	na	na	na	na	na	na	na	2210	1718	1138	464	77	709	799	840	1000	1231	na	na	na	na	na	na	na	na	na	na	2100	2983	504	529	908	838	880	879	854	886	na	na	na	na	na	na	na	na	na
E134I	na	na	na	na	na	na	na	na	na	na	1615	1291	833	391	65	367	386	697	677	784	na	na	na	na	na	na	na	na	na	na	1402	1993	521	556	502	734	724	817	754	711	na	na	na	na	na	na	na	na	na
E134K	na	na	na	na	na	na	na	na	na	na	4	4763	2845	1467	229	1666	2372	2265	2980	3150	na	na	na	na	na	na	na	na	na	na	20	7465	1656	1880	2083	2508	2810	3001	2715	2893	na	na	na	na	na	na	na	na	na
E134L	na	na	na	na	na	na	na	na	na	na	7486	6319	3932	1956	288	3052	2553	3167	3570	3973	na	na	na	na	na	na	na	na	na	na	34	10271	2446	2268	3492	3661	3676	3958	3709	3613	na	na	na	na	na	na	na	na	na
E134M	na	na	na	na	na	na	na	na	na	na	2260	1833	1158	581	78	566	930	822	1189	1204	na	na	na	na	na	na	na	na	na	na	1821	3153	705	705	919	1111	1156	1326	1038	1120	na	na	na	na	na	na	na	na	na
E134N	na	na	na	na	na	na	na	na	na	na	1	2656	2076	949	152	1157	1261	1664	876	1939	na	na	na	na	na	na	na	na	na	na	8	5098	1160	1218	1222	1646	1708	1813	1603	1609	na	na	na	na	na	na	na	na	na
E134P	na	na	na	na	na	na	na	na	na	na	3	8917	5712	2372	420	3313	4171	4413	4818	5099	na	na	na	na	na	na	na	na	na	na	68	15354	3361	3460	4467	4868	5121	4997	4452	4571	na	na	na	na	na	na	na	na	na
E134Q	na	na	na	na	na	na	na	na	na	na	10	936	568	261	41	445	596	446	454	649	na	na	na	na	na	na	na	na	na	na	1048	1449	251	301	261	550	492	495	461	458	na	na	na	na	na	na	na	na	na
E134R	na	na	na	na	na	na	na	na	na	na	1	5230	3371	1504	269	2108	2710	2857	3491	3775	na	na	na	na	na	na	na	na	na	na	9	9301	2059	2113	2458	3300	3483	3496	3474	3324	na	na	na	na	na	na	na	na	na
E134S	na	na	na	na	na	na	na	na	na	na	1	3320	2102	934	162	979	1411	1363	1532	1995	na	na	na	na	na	na	na	na	na	na	13	5609	1179	1341	1481	1935	1953	2149	1767	1748	na	na	na	na	na	na	na	na	na
E134T	na	na	na	na	na	na	na	na	na	na	3940	3643	1997	839	146	1047	2502	1400	1574	1892	na	na	na	na	na	na	na	na	na	na	15	5089	1143	1309	1675	1597	1804	1739	1700	1679	na	na	na	na	na	na	na	na	na
E134V	na	na	na	na	na	na	na	na	na	na	10	9	2814	1275	242	1634	2086	2532	2542	3006	na	na	na	na	na	na	na	na	na	na	34	7854	1431	1781	1890	2317	2415	2372	2154	2274	na	na	na	na	na	na	na	na	na
E134W	na	na	na	na	na	na	na	na	na	na	2025	1468	1015	444	75	586	758	652	957	950	na	na	na	na	na	na	na	na	na	na	11	2986	658	698	694	1068	1081	1066	948	949	na	na	na	na	na	na	na	na	na
E134Y	na	na	na	na	na	na	na	na	na	na	1229	711	588	253	40	193	484	502	402	590	na	na	na	na	na	na	na	na	na	na	1168	1651	224	332	331	382	397	422	416	442	na	na	na	na	na	na	na	na	na
E139*	na	na	na	na	na	na	na	na	na	na	56	44	21	18	49	219	5	20	32	39	na	na	na	na	na	na	na	na	na	na	53	10	9	11	17	22	na	7	6	11	na	na	na	na	na	na	na	na	na
E139A	na	na	na	na	na	na	na	na	na	na	2136	1819	1082	588	81	487	786	744	738	866	na	na	na	na	na	na	na	na	na	na	1717	2977	547	432	511	793	817	894	698	581	na	na	na	na	na	na	na	na	na
E139C	na	na	na	na	na	na	na	na	na	na	1471	1066	740	271	43	353	370	408	432	587	na	na	na	na	na	na	na	na	na	na	1188	2007	427	387	442	655	592	713	596	528	na	na	na	na	na	na	na	na	na
E139D	na	na	na	na	na	na	na	na	na	na	34	68	52	16	31	5	14	5	na	na	na	na	na	na	na	na	na	na	na	na	9	6	na	na	na	na	na	na	na	na	na	na	na	na	na	na	na	na	na
E139F	na	na	na	na	na	na	na	na	na	na	6418	5034	2960	1311	216	1604	2052	1868	2316	2498	na	na	na	na	na	na	na	na	na	na	18	8220	1916	1777	1904	2545	2544	2333	2091	2148	na	na	na	na	na	na	na	na	na
E139G	na	na	na	na	na	na	na	na	na	na	6	6035	3362	1227	202	1592	2128	2063	2758	2315	na	na	na	na	na	na	na	na	na	na	12	9112	1922	1868	1923	2568	2663	2709	2020	2147	na	na	na	na	na	na	na	na	na
E139H	na	na	na	na	na	na	na	na	na	na	3261	2543	1538	679	99	698	1115	1614	1284	1249	na	na	na	na	na	na	na	na	na	na	3313	4066	792	800	1006	1211	1294	1299	984	1109	na	na	na	na	na	na	na	na	na
E139I	na	na	na	na	na	na	na	na	na	na	1650	1384	777	299	39	494	442	434	789	611	na	na	na	na	na	na	na	na	na	na	1733	2209	466	421	494	612	707	734	507	560	na	na	na	na	na	na	na	na	na
E139K	na	na	na	na	na	na	na	na	na	na	8	3402	1966	833	122	885	1107	1436	1470	1698	na	na	na	na	na	na	na	na	na	na	32	5375	1051	1147	1403	1618	1575	1622	1507	1462	na	na	na	na	na	na	na	na	na
E139L	na	na	na	na	na	na	na	na	na	na	13513	10892	6202	2859	410	3335	4096	4736	4660	5301	na	na	na	na	na	na	na	na	na	na	44	17749	3839	3904	4367	5158	5631	5863	4621	4626	na	na	na	na	na	na	na	na	na
E139M	na	na	na	na	na	na	na	na	na	na	2883	2184	1389	603	96	757	945	945	1052	1188	na	na	na	na	na	na	na	na	na	na	2414	3615	710	796	817	1132	1223	1188	918	963	na	na	na	na	na	na	na	na	na
E139N	na	na	na	na	na	na	na	na	na	na	2653	2090	1279	701	89	724	990	891	783	1130	na	na	na	na	na	na	na	na	na	na	2693	3266	510	613	731	900	971	881	822	805	na	na	na	na	na	na	na	na	na
E139P	na	na	na	na	na	na	na	na	na	na	4082	1097	975	591	31	245	413	622	174	154	na	na	na	na	na	na	na	na	na	na	3474	1872	783	563	962	556	349	315	145	122	na	na	na	na	na	na	na	na	na
E139Q	na	na	na	na	na	na	na	na	na	na	3	1259	1018	399	70	488	932	429	704	655	na	na	na	na	na	na	na	na	na	na	1733	2360	511	488	708	740	758	684	600	607	na	na	na	na	na	na	na	na	na
E139R	na	na	na	na	na	na	na	na	na	na	6686	5373	3306	1445	208	1704	2340	2137	2969	2739	na	na	na	na	na	na	na	na	na	na	42	9225	1821	2060	2335	2791	2829	2949	2426	2441	na	na	na	na	na	na	na	na	na
E139S	na	na	na	na	na	na	na	na	na	na	1	3298	2242	960	200	1412	1454	1534	1441	1883	na	na	na	na	na	na	na	na	na	na	11	6564	1337	1397	1990	2111	2119	2128	1888	1880	na	na	na	na	na	na	na	na	na
E139T	na	na	na	na	na	na	na	na	na	na	3577	2906	1656	701	81	1043	947	1065	1328	1559	na	na	na	na	na	na	na	na	na	na	10	4711	1047	999	1164	1440	1437	1443	1335	1243	na	na	na	na	na	na	na	na	na
E139V	na	na	na	na	na	na	na	na	na	na	6	5073	2707	1091	180	1378	1597	1744	2335	2317	na	na	na	na	na	na	na	na	na	na	4975	7316	1236	1342	1421	1855	2046	2139	1748	1909	na	na	na	na	na	na	na	na	na
E139W	na	na	na	na	na	na	na	na	na	na	2242	1887	1018	432	61	574	904	711	562	825	na	na	na	na	na	na	na	na	na	na	1677	2835	516	592	558	763	851	949	762	629	na	na	na	na	na	na	na	na	na
E139Y	na	na	na	na	na	na	na	na	na	na	1416	1002	532	190	25	171	414	299	337	320	na	na	na	na	na	na	na	na	na	na	1261	1638	117	104	248	147	170	142	118	145	na	na	na	na	na	na	na	na	na
E154*	na	na	na	na	na	na	na	na	na	na	2	na	na	na	6	9	na	na	na	na	na	na	na	na	na	na	na	na	na	na	na	na	na	na	na	na	na	na	na	na	na	na	na	na	na	na	na	na	na
E154A	na	na	na	na	na	na	na	na	na	na	3	837	511	295	41	364	299	578	657	767	na	na	na	na	na	na	na	na	na	na	751	1489	226	285	428	471	483	511	454	530	na	na	na	na	na	na	na	na	na
E154C	na	na	na	na	na	na	na	na	na	na	551	560	306	166	19	254	136	388	503	488	na	na	na	na	na	na	na	na	na	na	476	855	174	188	275	328	353	381	391	387	na	na	na	na	na	na	na	na	na
E154D	na	na	na	na	na	na	na	na	na	na	3	17	na	na	3	na	na	na	na	7	na	na	na	na	na	na	na	na	na	na	na	na	na	na	na	na	na	na	na	na	na	na	na	na	na	na	na	na	na
E154F	na	na	na	na	na	na	na	na	na	na	1308	1181	764	249	44	448	555	555	593	794	na	na	na	na	na	na	na	na	na	na	1440	1664	372	361	531	532	553	559	513	534	na	na	na	na	na	na	na	na	na
E154G	na	na	na	na	na	na	na	na	na	na	3	3329	813	273	40	226	473	275	613	396	na	na	na	na	na	na	na	na	na	na	17	4428	229	202	315	383	313	312	251	291	na	na	na	na	na	na	na	na	na
E154H	na	na	na	na	na	na	na	na	na	na	929	905	581	261	44	319	315	698	493	662	na	na	na	na	na	na	na	na	na	na	9	1338	301	325	352	480	472	578	541	540	na	na	na	na	na	na	na	na	na
E154I	na	na	na	na	na	na	na	na	na	na	615	555	284	156	29	247	407	310	429	342	na	na	na	na	na	na	na	na	na	na	546	861	192	228	270	324	352	342	293	360	na	na	na	na	na	na	na	na	na
E154K	na	na	na	na	na	na	na	na	na	na	2	299	10	9	5	na	na	15	37	27	na	na	na	na	na	na	na	na	na	na	525	754	na	na	6	na	na	na	na	na	na	na	na	na	na	na	na	na	na
E154L	na	na	na	na	na	na	na	na	na	na	3924	3672	2202	1000	164	1371	1974	2390	2661	2913	na	na	na	na	na	na	na	na	na	na	9	5245	1101	1091	1426	1764	1939	2107	1913	2107	na	na	na	na	na	na	na	na	na
E154M	na	na	na	na	na	na	na	na	na	na	974	957	553	177	56	332	522	523	764	742	na	na	na	na	na	na	na	na	na	na	1006	1415	456	302	401	484	548	634	655	621	na	na	na	na	na	na	na	na	na
E154N	na	na	na	na	na	na	na	na	na	na	1891	1735	1221	467	85	817	701	1166	984	1324	na	na	na	na	na	na	na	na	na	na	2036	2718	596	514	597	931	927	994	973	1080	na	na	na	na	na	na	na	na	na
E154P	na	na	na	na	na	na	na	na	na	na	604	102	57	43	2	16	43	25	11	14	na	na	na	na	na	na	na	na	na	na	442	104	20	15	21	22	6	29	na	7	na	na	na	na	na	na	na	na	na
E154Q	na	na	na	na	na	na	na	na	na	na	2	na	na	na	5	na	na	na	14	na	na	na	na	na	na	na	na	na	na	na	na	na	na	na	na	na	na	na	na	na	na	na	na	na	na	na	na	na	na
E154R	na	na	na	na	na	na	na	na	na	na	3217	2874	1877	855	152	1114	1551	1841	1905	2479	na	na	na	na	na	na	na	na	na	na	14	4681	1027	1045	1382	1516	1756	1967	1844	1913	na	na	na	na	na	na	na	na	na
E154S	na	na	na	na	na	na	na	na	na	na	1	2258	1533	936	133	1112	1328	1613	1968	2198	na	na	na	na	na	na	na	na	na	na	12	3795	834	817	1048	1368	1499	1628	1560	1673	na	na	na	na	na	na	na	na	na
E154T	na	na	na	na	na	na	na	na	na	na	2879	2496	1641	703	98	1002	1252	1567	2091	2284	na	na	na	na	na	na	na	na	na	na	2445	3884	824	812	1195	1387	1556	1667	1570	1682	na	na	na	na	na	na	na	na	na
E154V	na	na	na	na	na	na	na	na	na	na	4	726	483	208	40	305	442	585	885	692	na	na	na	na	na	na	na	na	na	na	755	1209	288	203	348	403	463	694	507	491	na	na	na	na	na	na	na	na	na
E154W	na	na	na	na	na	na	na	na	na	na	1320	1258	813	273	42	457	463	429	616	709	na	na	na	na	na	na	na	na	na	na	1312	1731	313	384	366	466	528	460	435	405	na	na	na	na	na	na	na	na	na
E154Y	na	na	na	na	na	na	na	na	na	na	567	745	371	165	24	216	354	328	412	429	na	na	na	na	na	na	na	na	na	na	731	939	188	184	206	329	262	302	325	295	na	na	na	na	na	na	na	na	na
E157*	na	na	na	na	na	na	na	na	na	na	4	na	na	5	7	na	na	na	na	na	na	na	na	na	na	na	na	na	na	na	na	na	na	na	na	na	na	na	na	na	na	na	na	na	na	na	na	na	na
E157A	na	na	na	na	na	na	na	na	na	na	1729	1758	534	194	55	220	352	346	419	517	na	na	na	na	na	na	na	na	na	na	12	2176	266	270	311	432	474	437	360	412	na	na	na	na	na	na	na	na	na
E157C	na	na	na	na	na	na	na	na	na	na	362	265	190	93	15	112	214	172	209	160	na	na	na	na	na	na	na	na	na	na	11	493	84	121	125	149	186	162	171	164	na	na	na	na	na	na	na	na	na
E157D	na	na	na	na	na	na	na	na	na	na	1	320	17	na	6	na	na	11	9	10	na	na	na	na	na	na	na	na	na	na	444	212	na	na	na	na	na	na	na	na	na	na	na	na	na	na	na	na	na
E157F	na	na	na	na	na	na	na	na	na	na	965	641	479	214	31	212	245	399	240	399	na	na	na	na	na	na	na	na	na	na	1138	1153	214	213	258	350	392	374	333	313	na	na	na	na	na	na	na	na	na
E157G	na	na	na	na	na	na	na	na	na	na	5	4156	1520	230	53	635	1291	1096	1242	1216	na	na	na	na	na	na	na	na	na	na	4939	6058	236	240	345	411	570	465	407	450	na	na	na	na	na	na	na	na	na
E157H	na	na	na	na	na	na	na	na	na	na	1149	1000	564	268	54	293	295	349	294	519	na	na	na	na	na	na	na	na	na	na	1239	1514	330	307	295	475	576	563	451	393	na	na	na	na	na	na	na	na	na
E157I	na	na	na	na	na	na	na	na	na	na	1041	928	532	246	42	296	386	380	468	456	na	na	na	na	na	na	na	na	na	na	1101	1431	369	275	361	481	524	555	404	461	na	na	na	na	na	na	na	na	na
E157K	na	na	na	na	na	na	na	na	na	na	1	1355	24	14	11	8	na	9	51	21	na	na	na	na	na	na	na	na	na	na	1071	1418	na	na	5	na	na	na	na	na	na	na	na	na	na	na	na	na	na
E157L	na	na	na	na	na	na	na	na	na	na	1	2336	1453	754	99	767	1230	788	948	1176	na	na	na	na	na	na	na	na	na	na	2777	3747	934	744	946	1122	1247	1067	1025	979	na	na	na	na	na	na	na	na	na
E157M	na	na	na	na	na	na	na	na	na	na	998	765	533	207	33	244	673	381	295	446	na	na	na	na	na	na	na	na	na	na	1186	1251	266	248	275	367	389	377	358	338	na	na	na	na	na	na	na	na	na
E157N	na	na	na	na	na	na	na	na	na	na	3057	2269	1490	681	107	1382	1677	1054	999	1342	na	na	na	na	na	na	na	na	na	na	10	4285	1015	921	963	1382	1435	1496	1223	1345	na	na	na	na	na	na	na	na	na
E157P	na	na	na	na	na	na	na	na	na	na	1639	257	128	203	4	52	95	53	74	48	na	na	na	na	na	na	na	na	na	na	973	346	63	83	56	54	66	38	28	34	na	na	na	na	na	na	na	na	na
E157Q	na	na	na	na	na	na	na	na	na	na	na	na	11	4	3	na	na	6	na	na	na	na	na	na	na	na	na	na	na	na	na	na	na	na	na	na	na	na	na	na	na	na	na	na	na	na	na	na	na
E157R	na	na	na	na	na	na	na	na	na	na	1	2269	1373	669	94	841	859	884	1229	1315	na	na	na	na	na	na	na	na	na	na	2768	3305	719	704	1149	1188	1153	1272	1018	1076	na	na	na	na	na	na	na	na	na
E157S	na	na	na	na	na	na	na	na	na	na	3166	2553	1647	777	129	1117	1453	1125	1438	1741	na	na	na	na	na	na	na	na	na	na	3083	4072	829	942	1055	1453	1421	1475	1327	1347	na	na	na	na	na	na	na	na	na
E157T	na	na	na	na	na	na	na	na	na	na	2	3970	2309	976	165	1061	1496	1300	1601	1890	na	na	na	na	na	na	na	na	na	na	5388	5795	1289	1369	1428	1792	1951	1859	1570	1557	na	na	na	na	na	na	na	na	na
E157V	na	na	na	na	na	na	na	na	na	na	6	938	530	269	51	280	265	296	377	469	na	na	na	na	na	na	na	na	na	na	1144	1465	300	282	332	447	459	468	375	439	na	na	na	na	na	na	na	na	na
E157W	na	na	na	na	na	na	na	na	na	na	1047	664	539	213	37	291	354	478	301	517	na	na	na	na	na	na	na	na	na	na	851	1197	230	236	252	354	364	412	329	343	na	na	na	na	na	na	na	na	na
E157Y	na	na	na	na	na	na	na	na	na	na	1	758	451	206	24	184	349	240	295	292	na	na	na	na	na	na	na	na	na	na	842	1193	338	229	309	369	442	354	325	325	na	na	na	na	na	na	na	na	na
E17*	487	na	91	7	na	na	na	na	na	na	na	na	na	na	na	na	na	na	na	na	731	96	30	25	28	na	na	na	na	16	na	na	na	na	na	na	na	na	na	na	185	56	30	14	10	na	8	na	16
E17A	962	na	992	432	454	405	513	514	433	3035	na	na	na	na	na	na	na	na	na	na	3248	3694	917	905	1025	999	1151	728	840	718	na	na	na	na	na	na	na	na	na	na	8	3570	681	601	718	776	730	755	619
E17C	934	na	1965	572	739	945	532	471	366	2751	na	na	na	na	na	na	na	na	na	na	2239	2091	988	917	1079	899	1062	531	635	459	na	na	na	na	na	na	na	na	na	na	1737	2200	695	621	1060	804	725	620	548
E17D	764	na	304	na	8	5	9	na	142	632	na	na	na	na	na	na	na	na	na	na	829	1233	na	na	na	na	na	36	66	11	na	na	na	na	na	na	na	na	na	na	706	883	na	na	na	12	na	na	na
E17F	3328	na	3012	845	965	716	784	402	201	1497	na	na	na	na	na	na	na	na	na	na	4142	3651	1501	1532	1516	1119	1193	547	567	487	na	na	na	na	na	na	na	na	na	na	2721	3429	1167	959	1393	1075	1011	716	555
E17G	40	8	11717	5102	6992	5807	7509	8111	7219	63271	na	na	na	na	na	na	na	na	na	na	16186	8	8299	8447	11690	11331	12562	8234	11785	11786	na	na	na	na	na	na	na	na	na	na	26	18590	5338	5586	7489	7594	8503	8265	7942
E17H	1740	5	1501	594	564	507	365	292	128	1256	na	na	na	na	na	na	na	na	na	na	2445	2119	866	756	947	753	1492	355	372	344	na	na	na	na	na	na	na	na	na	na	2329	2208	812	638	698	739	789	494	350
E17I	817	na	350	90	57	na	38	7	30	87	na	na	na	na	na	na	na	na	na	na	1075	373	122	98	93	41	23	23	40	46	na	na	na	na	na	na	na	na	na	na	861	376	178	181	128	123	75	40	58
E17K	5	10	7963	2144	2465	1413	1583	889	903	6153	na	na	na	na	na	na	na	na	na	na	9621	7900	3369	3476	3916	2632	4816	1157	1264	1176	na	na	na	na	na	na	na	na	na	na	14	8471	2916	2738	3352	3007	2979	2144	1377
E17L	7	5	14380	4261	5374	3618	4151	3349	2652	16176	na	na	na	na	na	na	na	na	na	na	17379	16062	6915	6767	8596	6528	7361	3529	4087	3265	na	na	na	na	na	na	na	na	na	na	20	16473	5627	4929	6432	6178	5931	4791	3321
E17M	5	na	2714	805	880	705	614	428	309	2777	na	na	na	na	na	na	na	na	na	na	3446	2771	1368	1181	1439	1057	1079	503	473	719	na	na	na	na	na	na	na	na	na	na	5	2826	1041	961	1164	1265	967	783	553
E17N	8	na	4284	1441	1942	1572	1966	1645	1451	11024	na	na	na	na	na	na	na	na	na	na	5320	5086	2206	2084	3018	2802	3553	1668	2092	2125	na	na	na	na	na	na	na	na	na	na	11	5102	1568	1680	2213	1993	2094	1918	1734
E17P	3784	na	1025	106	116	57	93	21	51	419	na	na	na	na	na	na	na	na	na	na	5970	728	230	216	211	124	168	86	59	94	na	na	na	na	na	na	na	na	na	na	3096	460	183	159	131	114	111	55	53
E17Q	34	na	4696	1173	1251	1120	915	530	549	2676	na	na	na	na	na	na	na	na	na	na	4487	4264	1817	1938	2073	1737	2138	710	1065	669	na	na	na	na	na	na	na	na	na	na	3436	4331	1407	1161	1736	1103	1413	1059	781
E17R	10504	5	8291	1670	1666	993	810	844	403	2922	na	na	na	na	na	na	na	na	na	na	12270	7422	3162	3117	3054	1808	2071	732	702	620	na	na	na	na	na	na	na	na	na	na	19	8064	3710	2770	2721	2628	2685	1520	1004
E17S	14	na	8863	3451	4521	4251	4580	4291	2974	22354	na	na	na	na	na	na	na	na	na	na	11926	13015	5575	5877	7285	6755	7788	4192	5146	5180	na	na	na	na	na	na	na	na	na	na	25	12877	4091	3986	5282	4872	5188	4559	4131
E17T	4	na	5542	1207	1345	849	845	655	385	2692	na	na	na	na	na	na	na	na	na	na	5963	4902	2081	2116	2184	1518	1733	757	908	1011	na	na	na	na	na	na	na	na	na	na	4970	5108	1799	1612	1738	1712	1551	1131	878
E17V	5469	na	6903	1539	1716	1497	961	782	599	3319	na	na	na	na	na	na	na	na	na	na	8109	6305	2621	2388	2693	1827	1850	802	901	799	na	na	na	na	na	na	na	na	na	na	5	6597	2361	2092	2383	2129	1798	1331	915
E17W	5	na	7373	1577	1680	1119	783	552	329	2019	na	na	na	na	na	na	na	na	na	na	10547	6796	2795	2570	2781	1660	1654	661	643	513	na	na	na	na	na	na	na	na	na	na	6	7104	2769	2423	2616	2075	2040	1318	849
E17Y	1294	na	1240	440	478	438	249	332	201	977	na	na	na	na	na	na	na	na	na	na	1887	1643	634	708	755	606	783	314	422	275	na	na	na	na	na	na	na	na	na	na	1396	1716	543	481	699	561	575	399	324
E48*	na	na	na	na	na	na	na	na	na	na	73	148	20	20	2	29	30	na	na	45	1044	190	130	90	120	63	36	63	25	49	na	na	na	na	na	na	na	na	na	na	556	157	72	39	120	49	76	51	50
E48A	na	na	na	na	na	na	na	na	na	na	276	4309	1280	1228	166	1202	1948	1845	2128	2460	3632	4600	2707	2248	2567	2432	3067	2313	3833	4094	na	na	na	na	na	na	na	na	na	na	2695	3908	1495	1779	2395	2502	2536	2605	2610
E48C	na	na	na	na	na	na	na	na	na	na	100	1602	517	511	60	606	551	544	1183	918	1633	1577	967	776	906	1070	885	890	1453	1418	na	na	na	na	na	na	na	na	na	na	1019	1523	590	591	1185	891	991	901	999
E48D	na	na	na	na	na	na	na	na	na	na	14	122	13	13	8	746	na	9	20	24	328	271	na	na	na	na	na	na	na	na	na	na	na	na	na	na	na	na	na	na	120	122	na	na	na	13	na	na	na
E48F	na	na	na	na	na	na	na	na	na	na	192	2642	827	818	100	690	992	1149	1465	1373	2421	2999	1673	1506	1573	1592	1830	1380	2221	2128	na	na	na	na	na	na	na	na	na	na	2017	2584	1049	1116	1597	1613	1668	1586	1607
E48G	na	na	na	na	na	na	na	na	na	na	1198	17572	5270	4942	694	5372	7398	8063	14915	10550	15131	17329	9864	8751	9406	9657	10895	9195	14224	17438	na	na	na	na	na	na	na	na	na	na	10074	14911	6370	6193	9435	8808	10354	10482	10743
E48H	na	na	na	na	na	na	na	na	na	na	111	1861	565	502	77	652	750	759	880	953	2155	1774	1111	1037	961	930	1011	1008	1445	1602	na	na	na	na	na	na	na	na	na	na	1123	1680	630	636	968	919	947	1018	980
E48I	na	na	na	na	na	na	na	na	na	na	128	1618	496	416	61	727	639	449	541	644	1743	1507	930	814	985	884	1446	764	1143	923	na	na	na	na	na	na	na	na	na	na	1367	1439	745	525	925	854	965	823	743
E48K	na	na	na	na	na	na	na	na	na	na	664	9776	2792	2937	348	2844	4357	3529	4115	5479	29	10250	5560	5218	5496	5293	7045	5045	7399	8493	na	na	na	na	na	na	na	na	na	na	5895	8587	3802	3398	5495	5026	5803	5492	5572
E48L	na	na	na	na	na	na	na	na	na	na	1034	15292	4272	4554	569	5206	6388	6471	7744	9303	12547	15041	9035	7846	8161	8341	10813	7883	12258	14409	na	na	na	na	na	na	na	na	na	na	9526	13797	5786	5501	8380	8280	8901	9226	9727
E48M	na	na	na	na	na	na	na	na	na	na	444	5979	1710	1548	192	2059	2179	2028	2327	2876	5002	6009	3547	3019	3352	3280	4498	3065	4139	4615	na	na	na	na	na	na	na	na	na	na	4074	5580	2327	2342	3605	3476	3375	3505	3499
E48N	na	na	na	na	na	na	na	na	na	na	117	1574	593	488	60	619	719	452	956	877	1150	1384	856	698	891	764	894	712	1066	1238	na	na	na	na	na	na	na	na	na	na	987	1425	530	585	833	830	874	947	793
E48P	na	na	na	na	na	na	na	na	na	na	143	996	392	339	18	153	108	103	64	202	1987	1491	1011	981	811	752	498	433	510	381	na	na	na	na	na	na	na	na	na	na	1465	1582	636	686	631	575	653	499	422
E48Q	na	na	na	na	na	na	na	na	na	na	455	6565	1978	1951	248	2066	1959	2602	3483	3565	10	6712	3881	3548	3669	3885	4807	3428	5976	6061	na	na	na	na	na	na	na	na	na	na	4452	6120	2814	2599	3816	4107	3878	4314	4129
E48R	na	na	na	na	na	na	na	na	na	na	1296	20326	5813	5863	721	6099	8339	8417	10154	11668	8	21076	12858	10859	11651	11666	13377	11094	17867	21242	na	na	na	na	na	na	na	na	na	na	13187	19303	7731	7884	11387	11265	16177	13439	13738
E48S	na	na	na	na	na	na	na	na	na	na	372	5103	1402	1480	187	1283	2682	2076	2871	2886	4909	5450	3065	2976	3041	3148	4081	2920	4301	4872	na	na	na	na	na	na	na	na	na	na	3567	4703	1876	2045	2927	3145	3383	3455	3127
E48T	na	na	na	na	na	na	na	na	na	na	317	4442	1207	1276	146	1360	1527	1232	1750	2079	4086	4289	2628	2286	2405	2468	3142	2013	2734	3487	na	na	na	na	na	na	na	na	na	na	2913	4084	1560	1666	2551	2281	2531	2300	2352
E48V	na	na	na	na	na	na	na	na	na	na	551	7758	2193	2260	298	2377	3103	3256	4470	4502	7080	7315	4482	3781	4527	4342	5265	4332	6275	7017	na	na	na	na	na	na	na	na	na	na	4653	6690	2787	2758	4446	4091	4280	4607	4614
E48W	na	na	na	na	na	na	na	na	na	na	574	9093	2588	2629	337	2968	3549	3370	5093	5183	8	8435	5134	4332	4654	4849	5653	4651	7733	8110	na	na	na	na	na	na	na	na	na	na	5248	7607	2919	3081	4248	4486	5032	5461	5241
E48Y	na	na	na	na	na	na	na	na	na	na	137	2060	561	583	71	549	754	627	674	1121	2007	1816	1164	919	1069	1002	1168	984	1275	1717	na	na	na	na	na	na	na	na	na	na	1093	1671	634	694	795	1033	1075	1052	1007
E80*	na	na	na	na	na	na	na	na	na	na	69	90	29	37	5	20	23	20	9	17	1104	116	69	54	28	14	30	20	39	na	na	na	na	na	na	na	na	na	na	na	487	87	48	25	23	35	24	25	na
E80A	na	na	na	na	na	na	na	na	na	na	196	2055	906	740	102	612	681	594	743	917	1835	2163	1246	854	1096	973	1171	840	900	1041	na	na	na	na	na	na	na	na	na	na	1629	1940	622	616	936	981	984	916	682
E80C	na	na	na	na	na	na	na	na	na	na	55	733	297	235	31	240	234	298	111	272	801	699	408	340	355	278	400	321	332	326	na	na	na	na	na	na	na	na	na	na	450	629	242	188	276	257	323	289	301
E80D	na	na	na	na	na	na	na	na	na	na	30	255	94	427	20	60	47	101	126	655	15	na	na	na	13	na	na	na	10	na	na	na	na	na	na	na	na	na	na	na	35	na	na	na	na	7	na	12	na
E80F	na	na	na	na	na	na	na	na	na	na	184	2180	755	750	101	748	1052	834	544	815	2234	2113	1172	1001	1135	1082	1342	968	1047	1166	na	na	na	na	na	na	na	na	na	na	1571	2101	678	735	1136	1060	1135	925	820
E80G	na	na	na	na	na	na	na	na	na	na	1100	13601	4713	4769	593	4336	6560	5441	5284	5900	13341	13590	7973	6727	6827	6897	9201	6053	7209	7761	na	na	na	na	na	na	na	na	na	na	9846	13125	5196	4744	6860	6358	6693	6352	5750
E80H	na	na	na	na	na	na	na	na	na	na	10	130	40	53	3	45	89	44	na	68	134	86	21	10	62	22	59	40	51	38	na	na	na	na	na	na	na	na	na	na	67	85	36	12	37	74	30	30	43
E80I	na	na	na	na	na	na	na	na	na	na	99	1098	410	328	46	352	619	372	318	409	1431	1096	511	532	463	558	746	491	534	442	na	na	na	na	na	na	na	na	na	na	812	948	334	333	500	378	548	460	504
E80K	na	na	na	na	na	na	na	na	na	na	677	7968	2798	2569	353	2981	2790	2028	2587	2915	8508	8266	4413	3819	4143	4128	5043	3381	3907	4165	na	na	na	na	na	na	na	na	na	na	6395	8088	2976	2920	4271	4055	4106	3897	3245
E80L	na	na	na	na	na	na	na	na	na	na	871	9850	3730	3288	441	3371	4084	3772	3024	4357	10882	10619	5667	4773	5481	4910	6384	4547	5476	6012	na	na	na	na	na	na	na	na	na	na	7800	9775	3758	3501	5426	4966	5191	4784	4241
E80M	na	na	na	na	na	na	na	na	na	na	369	4368	1618	1675	196	1569	1686	1324	1383	1943	4391	4596	2662	2032	2326	2119	2374	1908	2422	2621	na	na	na	na	na	na	na	na	na	na	3347	4260	1579	1619	2519	2065	2084	2063	1849
E80N	na	na	na	na	na	na	na	na	na	na	34	541	184	187	31	211	163	193	122	179	607	511	287	235	255	241	185	239	144	258	na	na	na	na	na	na	na	na	na	na	253	487	219	159	239	165	251	171	173
E80P	na	na	na	na	na	na	na	na	na	na	98	557	239	187	15	161	42	81	84	91	898	664	494	322	477	336	364	231	156	190	na	na	na	na	na	na	na	na	na	na	579	727	254	313	285	339	366	302	203
E80Q	na	na	na	na	na	na	na	na	na	na	207	2238	848	867	94	901	887	978	748	1019	2306	2334	1065	1039	1262	1136	1322	981	1048	1276	na	na	na	na	na	na	na	na	na	na	1645	2177	868	738	1035	1075	1113	997	937
E80R	na	na	na	na	na	na	na	na	na	na	797	8599	3216	2817	397	2838	3565	2654	2803	3116	9853	8861	4721	4075	4657	4446	4981	3628	3976	4321	na	na	na	na	na	na	na	na	na	na	7067	8464	3160	3102	4619	4032	4440	4004	3215
E80S	na	na	na	na	na	na	na	na	na	na	250	2778	999	867	132	873	1169	832	1383	1145	2581	2783	1401	1173	1399	1232	1821	1369	1342	1558	na	na	na	na	na	na	na	na	na	na	2096	2519	848	809	1242	1137	1236	1186	1048
E80T	na	na	na	na	na	na	na	na	na	na	198	2414	845	867	117	956	902	715	837	980	2068	2349	1324	1045	1190	1122	1481	1038	1125	1358	na	na	na	na	na	na	na	na	na	na	1964	2251	773	715	1181	1040	1093	1112	940
E80V	na	na	na	na	na	na	na	na	na	na	431	5686	2122	1976	257	1692	2239	2147	1736	2438	6423	5852	2947	2461	3037	2950	2662	2359	2620	2989	na	na	na	na	na	na	na	na	na	na	4254	5441	1871	1807	2813	2837	2569	2581	2052
E80W	na	na	na	na	na	na	na	na	na	na	316	3065	1288	1203	131	930	1150	850	806	935	4220	3426	1966	1653	1888	1721	2016	1311	1414	1411	na	na	na	na	na	na	na	na	na	na	2904	3272	1199	1258	1856	1593	1754	1361	1092
E80Y	na	na	na	na	na	na	na	na	na	na	31	410	138	169	23	152	223	152	130	135	290	391	186	162	188	177	227	158	184	106	na	na	na	na	na	na	na	na	na	na	386	411	120	132	176	147	162	130	121
E90*	405	111	na	8	11	58	na	125	9	59	na	na	na	na	na	na	na	na	na	na	na	na	na	na	na	na	na	na	na	na	163	na	na	na	na	na	na	na	na	na	na	na	na	na	na	na	na	na	na
E90A	1572	1381	na	499	522	441	397	678	218	2112	na	na	na	na	na	na	na	na	na	na	na	na	na	na	na	na	na	na	na	na	2760	2104	569	475	451	549	571	530	392	363	na	na	na	na	na	na	na	na	na
E90C	211	430	na	158	160	167	41	46	196	653	na	na	na	na	na	na	na	na	na	na	na	na	na	na	na	na	na	na	na	na	586	349	87	101	108	141	125	142	96	106	na	na	na	na	na	na	na	na	na
E90D	na	na	na	na	na	na	na	6	24	na	na	na	na	na	na	na	na	na	na	na	na	na	na	na	na	na	na	na	na	na	na	na	na	na	7	na	na	na	na	na	na	na	na	na	na	na	na	na	na
E90F	440	323	na	128	112	89	175	441	55	441	na	na	na	na	na	na	na	na	na	na	na	na	na	na	na	na	na	na	na	na	690	207	96	89	89	105	98	96	56	62	na	na	na	na	na	na	na	na	na
E90G	9048	8443	na	2883	3021	2672	1707	1831	885	7329	na	na	na	na	na	na	na	na	na	na	na	na	na	na	na	na	na	na	na	na	18660	9154	3036	2298	2351	2671	2213	1781	1145	1048	na	na	na	na	na	na	na	na	na
E90H	348	485	na	163	170	57	96	250	169	766	na	na	na	na	na	na	na	na	na	na	na	na	na	na	na	na	na	na	na	na	591	391	111	87	82	111	89	159	111	115	na	na	na	na	na	na	na	na	na
E90I	643	519	na	190	227	142	292	221	94	942	na	na	na	na	na	na	na	na	na	na	na	na	na	na	na	na	na	na	na	na	1073	477	210	163	191	240	214	171	116	146	na	na	na	na	na	na	na	na	na
E90K	1150	567	na	191	173	81	141	89	83	389	na	na	na	na	na	na	na	na	na	na	na	na	na	na	na	na	na	na	na	na	1675	492	209	181	133	138	192	88	40	33	na	na	na	na	na	na	na	na	na
E90L	1353	1384	na	373	434	793	191	140	141	895	na	na	na	na	na	na	na	na	na	na	na	na	na	na	na	na	na	na	na	na	2878	1414	379	321	329	369	307	287	176	140	na	na	na	na	na	na	na	na	na
E90M	1447	2274	na	757	844	409	820	584	415	2460	na	na	na	na	na	na	na	na	na	na	na	na	na	na	na	na	na	na	na	na	3379	2320	734	734	640	795	767	783	552	553	na	na	na	na	na	na	na	na	na
E90N	280	415	na	149	189	104	114	131	185	1097	na	na	na	na	na	na	na	na	na	na	na	na	na	na	na	na	na	na	na	na	658	274	161	152	133	160	116	134	115	99	na	na	na	na	na	na	na	na	na
E90P	205	39	na	18	na	na	16	na	na	48	na	na	na	na	na	na	na	na	na	na	na	na	na	na	na	na	na	na	na	na	151	na	na	na	na	na	na	na	6	na	na	na	na	na	na	na	na	na	na
E90Q	265	432	na	168	172	93	138	89	75	579	na	na	na	na	na	na	na	na	na	na	na	na	na	na	na	na	na	na	na	na	714	567	105	119	95	135	161	131	79	88	na	na	na	na	na	na	na	na	na
E90R	1920	1209	na	420	372	331	220	256	157	1030	na	na	na	na	na	na	na	na	na	na	na	na	na	na	na	na	na	na	na	na	3436	1224	515	443	388	336	247	261	126	83	na	na	na	na	na	na	na	na	na
E90S	1026	1413	na	431	494	397	318	450	290	3353	na	na	na	na	na	na	na	na	na	na	na	na	na	na	na	na	na	na	na	na	1943	1313	396	333	429	478	391	379	318	250	na	na	na	na	na	na	na	na	na
E90T	644	786	na	216	215	441	90	113	91	559	na	na	na	na	na	na	na	na	na	na	na	na	na	na	na	na	na	na	na	na	1288	972	307	193	173	260	242	155	88	110	na	na	na	na	na	na	na	na	na
E90V	3481	3949	na	1280	1390	772	783	575	668	5069	na	na	na	na	na	na	na	na	na	na	na	na	na	na	na	na	na	na	na	na	7069	5449	1277	990	1249	1274	999	1010	609	671	na	na	na	na	na	na	na	na	na
E90W	976	998	na	355	333	244	232	1212	202	1026	na	na	na	na	na	na	na	na	na	na	na	na	na	na	na	na	na	na	na	na	2249	1451	372	398	280	418	326	265	174	175	na	na	na	na	na	na	na	na	na
E90Y	227	491	na	75	131	11	38	20	20	570	na	na	na	na	na	na	na	na	na	na	na	na	na	na	na	na	na	na	na	na	514	491	95	137	71	70	39	66	25	30	na	na	na	na	na	na	na	na	na
F103*	589	115	na	14	16	na	na	na	na	na	na	na	na	na	na	na	na	na	na	na	na	na	na	na	na	na	na	na	na	na	202	10	na	na	na	na	na	na	na	na	na	na	na	na	na	na	na	na	na
F103A	2078	4195	na	1479	1812	1503	1725	1741	1853	15646	na	na	na	na	na	na	na	na	na	na	na	na	na	na	na	na	na	na	na	na	6023	5412	1726	1839	1553	1990	1966	2269	1847	2007	na	na	na	na	na	na	na	na	na
F103C	18	na	10	na	9	6	na	7	na	na	na	na	na	na	na	na	na	na	na	na	na	na	na	na	na	na	na	na	na	na	na	na	na	na	na	na	na	na	na	na	na	na	na	na	na	na	na	na	na
F103D	301	71	na	6	na	na	na	na	na	na	na	na	na	na	na	na	na	na	na	na	na	na	na	na	na	na	na	na	na	na	182	15	na	na	na	na	na	na	na	na	na	na	na	na	na	na	na	na	na
F103E	835	189	na	57	80	24	6	32	31	475	na	na	na	na	na	na	na	na	na	na	na	na	na	na	na	na	na	na	na	na	679	73	38	44	18	28	20	15	7	7	na	na	na	na	na	na	na	na	na
F103G	3837	2067	na	762	729	489	226	283	263	1447	na	na	na	na	na	na	na	na	na	na	na	na	na	na	na	na	na	na	na	na	6447	1256	864	596	1033	541	384	234	121	122	na	na	na	na	na	na	na	na	na
F103H	1191	654	na	182	238	183	176	71	51	189	na	na	na	na	na	na	na	na	na	na	na	na	na	na	na	na	na	na	na	na	1802	496	187	243	308	178	153	91	76	59	na	na	na	na	na	na	na	na	na
F103I	8	na	na	na	na	na	na	na	na	na	na	na	na	na	na	na	na	na	na	na	na	na	na	na	na	na	na	na	na	na	na	na	na	na	na	na	na	na	na	na	na	na	na	na	na	na	na	na	na
F103K	758	187	na	51	44	43	35	32	34	105	na	na	na	na	na	na	na	na	na	na	na	na	na	na	na	na	na	na	na	na	561	68	24	16	22	29	20	25	21	6	na	na	na	na	na	na	na	na	na
F103L	1062	1748	na	717	871	612	741	727	1609	4496	na	na	na	na	na	na	na	na	na	na	na	na	na	na	na	na	na	na	na	na	2931	43	818	997	712	839	942	997	901	1105	na	na	na	na	na	na	na	na	na
F103M	2096	2850	na	1299	1374	1071	1645	1131	1754	8154	na	na	na	na	na	na	na	na	na	na	na	na	na	na	na	na	na	na	na	na	4545	3272	887	945	930	1045	1105	1225	1088	1097	na	na	na	na	na	na	na	na	na
F103N	1062	479	na	111	199	57	183	96	na	48	na	na	na	na	na	na	na	na	na	na	na	na	na	na	na	na	na	na	na	na	1552	163	137	151	127	55	70	19	47	11	na	na	na	na	na	na	na	na	na
F103P	1564	393	na	79	81	48	52	75	18	118	na	na	na	na	na	na	na	na	na	na	na	na	na	na	na	na	na	na	na	na	1126	467	263	111	134	282	250	219	345	170	na	na	na	na	na	na	na	na	na
F103Q	286	150	na	40	25	na	29	38	18	64	na	na	na	na	na	na	na	na	na	na	na	na	na	na	na	na	na	na	na	na	482	23	27	20	17	10	10	6	na	6	na	na	na	na	na	na	na	na	na
F103R	859	224	na	45	56	191	15	84	5	46	na	na	na	na	na	na	na	na	na	na	na	na	na	na	na	na	na	na	na	na	543	54	8	5	21	6	11	6	7	15	na	na	na	na	na	na	na	na	na
F103S	1300	1644	na	548	558	669	543	185	273	1631	na	na	na	na	na	na	na	na	na	na	na	na	na	na	na	na	na	na	na	na	2665	1661	426	380	376	456	373	325	240	293	na	na	na	na	na	na	na	na	na
F103T	3331	5013	na	2097	2621	1521	2369	1960	1824	12958	na	na	na	na	na	na	na	na	na	na	na	na	na	na	na	na	na	na	na	na	7440	7564	1768	1805	2109	2377	2290	2597	1937	2154	na	na	na	na	na	na	na	na	na
F103V	3577	5519	na	2090	2780	1972	2156	2127	1806	15297	na	na	na	na	na	na	na	na	na	na	na	na	na	na	na	na	na	na	na	na	8423	7623	1868	1705	1735	2086	2116	2400	1750	1865	na	na	na	na	na	na	na	na	na
F103W	1732	2566	na	1017	1294	1290	1381	1115	782	6785	na	na	na	na	na	na	na	na	na	na	na	na	na	na	na	na	na	na	na	na	3980	3105	794	759	763	897	902	964	841	798	na	na	na	na	na	na	na	na	na
F103Y	17	na	na	na	na	na	11	na	na	na	na	na	na	na	na	na	na	na	na	na	na	na	na	na	na	na	na	na	na	na	na	na	na	na	na	na	na	na	na	na	na	na	na	na	na	na	na	na	na
F125*	na	na	na	na	na	na	na	na	na	na	136	16	6	4	2	na	na	26	42	13	na	na	na	na	na	na	na	na	na	na	41	13	na	na	na	na	na	na	na	na	na	na	na	na	na	na	na	na	na
F125A	na	na	na	na	na	na	na	na	na	na	1097	414	350	134	16	203	103	166	42	83	na	na	na	na	na	na	na	na	na	na	675	572	264	214	208	277	118	109	78	68	na	na	na	na	na	na	na	na	na
F125C	na	na	na	na	na	na	na	na	na	na	7	na	22	na	7	na	na	na	na	na	na	na	na	na	na	na	na	na	na	na	8	na	na	na	na	na	na	na	na	na	na	na	na	na	na	na	na	na	na
F125D	na	na	na	na	na	na	na	na	na	na	107	14	na	12	na	na	6	na	na	na	na	na	na	na	na	na	na	na	na	na	52	24	na	na	na	na	6	na	na	na	na	na	na	na	na	na	na	na	na
F125E	na	na	na	na	na	na	na	na	na	na	280	108	18	15	1	8	na	7	na	na	na	na	na	na	na	na	na	na	na	na	59	47	13	9	19	8	14	8	na	na	na	na	na	na	na	na	na	na	na
F125G	na	na	na	na	na	na	na	na	na	na	3	1930	1671	749	82	616	808	570	390	523	na	na	na	na	na	na	na	na	na	na	9	2788	1138	967	803	1114	1061	709	569	556	na	na	na	na	na	na	na	na	na
F125H	na	na	na	na	na	na	na	na	na	na	980	254	299	210	12	53	133	116	16	24	na	na	na	na	na	na	na	na	na	na	713	441	190	122	109	162	86	57	26	33	na	na	na	na	na	na	na	na	na
F125I	na	na	na	na	na	na	na	na	na	na	20	23	33	16	19	4	5	5	20	15	na	na	na	na	na	na	na	na	na	na	6	na	na	na	na	na	na	na	na	na	na	na	na	na	na	na	na	na	na
F125K	na	na	na	na	na	na	na	na	na	na	477	76	44	16	na	15	24	46	na	22	na	na	na	na	na	na	na	na	na	na	286	89	38	12	19	16	22	11	na	7	na	na	na	na	na	na	na	na	na
F125L	na	na	na	na	na	na	na	na	na	na	8	7	1042	441	66	402	783	674	970	818	na	na	na	na	na	na	na	na	na	na	1919	2384	563	551	630	741	721	684	638	609	na	na	na	na	na	na	na	na	na
F125M	na	na	na	na	na	na	na	na	na	na	2471	2053	1284	612	90	648	843	928	1136	1360	na	na	na	na	na	na	na	na	na	na	2032	2911	667	792	571	912	902	951	910	933	na	na	na	na	na	na	na	na	na
F125N	na	na	na	na	na	na	na	na	na	na	425	126	44	12	4	na	40	17	na	8	na	na	na	na	na	na	na	na	na	na	256	47	na	na	na	na	na	na	na	na	na	na	na	na	na	na	na	na	na
F125P	na	na	na	na	na	na	na	na	na	na	1055	277	110	32	4	28	28	90	na	11	na	na	na	na	na	na	na	na	na	na	511	205	31	44	23	31	31	25	13	8	na	na	na	na	na	na	na	na	na
F125Q	na	na	na	na	na	na	na	na	na	na	161	60	24	12	na	na	na	9	na	na	na	na	na	na	na	na	na	na	na	na	137	41	5	na	na	7	9	na	na	na	na	na	na	na	na	na	na	na	na
F125R	na	na	na	na	na	na	na	na	na	na	600	155	81	4	5	39	85	31	37	39	na	na	na	na	na	na	na	na	na	na	370	124	14	16	11	27	11	6	na	8	na	na	na	na	na	na	na	na	na
F125S	na	na	na	na	na	na	na	na	na	na	6	183	165	58	9	30	19	32	na	na	na	na	na	na	na	na	na	na	na	na	759	205	151	73	28	29	7	na	na	na	na	na	na	na	na	na	na	na	na
F125T	na	na	na	na	na	na	na	na	na	na	922	184	110	25	3	na	138	40	14	16	na	na	na	na	na	na	na	na	na	na	623	147	25	22	na	21	19	na	6	9	na	na	na	na	na	na	na	na	na
F125V	na	na	na	na	na	na	na	na	na	na	2	381	316	393	17	106	174	42	43	37	na	na	na	na	na	na	na	na	na	na	1367	499	496	194	118	185	72	37	24	33	na	na	na	na	na	na	na	na	na
F125W	na	na	na	na	na	na	na	na	na	na	1266	995	720	311	44	378	522	718	553	664	na	na	na	na	na	na	na	na	na	na	1339	1652	337	343	869	502	602	562	460	543	na	na	na	na	na	na	na	na	na
F125Y	na	na	na	na	na	na	na	na	na	na	16	na	12	13	8	na	19	na	na	22	na	na	na	na	na	na	na	na	na	na	na	na	na	na	na	na	na	na	na	na	na	na	na	na	na	na	na	na	na
F137*	na	na	na	na	na	na	na	na	na	na	233	78	32	15	1	6	na	na	na	na	na	na	na	na	na	na	na	na	na	na	215	47	na	na	25	na	na	na	na	na	na	na	na	na	na	na	na	na	na
F137A	na	na	na	na	na	na	na	na	na	na	1687	1213	764	394	47	352	641	740	908	755	na	na	na	na	na	na	na	na	na	na	1522	1921	353	530	604	611	656	730	604	605	na	na	na	na	na	na	na	na	na
F137C	na	na	na	na	na	na	na	na	na	na	17	31	33	27	17	8	na	17	18	27	na	na	na	na	na	na	na	na	na	na	na	na	6	na	na	na	na	na	na	na	na	na	na	na	na	na	na	na	na
F137D	na	na	na	na	na	na	na	na	na	na	1304	1050	646	266	46	315	464	473	423	476	na	na	na	na	na	na	na	na	na	na	1294	1641	335	246	542	436	426	388	352	346	na	na	na	na	na	na	na	na	na
F137E	na	na	na	na	na	na	na	na	na	na	3716	2900	1901	855	136	1010	1731	1378	1550	1653	na	na	na	na	na	na	na	na	na	na	4120	4917	1110	1177	1285	1581	1698	1783	1483	1626	na	na	na	na	na	na	na	na	na
F137G	na	na	na	na	na	na	na	na	na	na	1	6739	3493	1407	233	1868	2342	2112	2281	2570	na	na	na	na	na	na	na	na	na	na	26	9197	2023	1822	2003	2653	2779	2680	2232	2181	na	na	na	na	na	na	na	na	na
F137H	na	na	na	na	na	na	na	na	na	na	1799	1504	864	459	50	496	769	756	913	972	na	na	na	na	na	na	na	na	na	na	1659	2307	480	632	1063	755	812	818	735	760	na	na	na	na	na	na	na	na	na
F137I	na	na	na	na	na	na	na	na	na	na	6	41	28	7	13	14	10	6	23	12	na	na	na	na	na	na	na	na	na	na	na	na	5	na	na	na	na	na	na	na	na	na	na	na	na	na	na	na	na
F137K	na	na	na	na	na	na	na	na	na	na	4925	4633	2542	1030	202	1421	1303	1820	2242	2525	na	na	na	na	na	na	na	na	na	na	12	6794	1386	1528	1928	2297	2454	2507	2064	2187	na	na	na	na	na	na	na	na	na
F137L	na	na	na	na	na	na	na	na	na	na	8	700	574	366	54	789	374	390	604	665	na	na	na	na	na	na	na	na	na	na	8	1305	235	364	287	429	421	424	399	478	na	na	na	na	na	na	na	na	na
F137M	na	na	na	na	na	na	na	na	na	na	1580	1285	859	423	62	533	755	512	576	741	na	na	na	na	na	na	na	na	na	na	1837	2054	320	443	466	532	585	527	554	568	na	na	na	na	na	na	na	na	na
F137N	na	na	na	na	na	na	na	na	na	na	3498	2834	1713	699	122	977	1316	1217	1494	1576	na	na	na	na	na	na	na	na	na	na	3427	4355	976	904	1093	1415	1518	1446	1152	1270	na	na	na	na	na	na	na	na	na
F137P	na	na	na	na	na	na	na	na	na	na	1611	363	390	66	9	54	124	85	17	64	na	na	na	na	na	na	na	na	na	na	1048	626	208	174	510	165	113	43	36	37	na	na	na	na	na	na	na	na	na
F137Q	na	na	na	na	na	na	na	na	na	na	1326	1045	632	287	47	356	593	586	607	768	na	na	na	na	na	na	na	na	na	na	997	1920	376	391	431	636	663	610	595	635	na	na	na	na	na	na	na	na	na
F137R	na	na	na	na	na	na	na	na	na	na	3087	2419	1391	629	104	880	944	1151	1635	1415	na	na	na	na	na	na	na	na	na	na	2744	4213	807	861	929	1309	1333	1348	1276	1262	na	na	na	na	na	na	na	na	na
F137S	na	na	na	na	na	na	na	na	na	na	2	1033	707	343	51	409	447	641	581	666	na	na	na	na	na	na	na	na	na	na	1185	1775	281	286	378	417	563	534	494	427	na	na	na	na	na	na	na	na	na
F137T	na	na	na	na	na	na	na	na	na	na	2324	2098	1144	468	89	787	851	1362	1085	1392	na	na	na	na	na	na	na	na	na	na	18	3131	647	689	704	980	1046	1035	1025	972	na	na	na	na	na	na	na	na	na
F137V	na	na	na	na	na	na	na	na	na	na	6	2384	1386	519	110	551	967	1104	940	1328	na	na	na	na	na	na	na	na	na	na	2275	3318	543	596	687	784	887	990	848	821	na	na	na	na	na	na	na	na	na
F137W	na	na	na	na	na	na	na	na	na	na	1697	1279	914	321	76	400	929	589	392	612	na	na	na	na	na	na	na	na	na	na	1626	2222	337	293	400	450	496	518	431	421	na	na	na	na	na	na	na	na	na
F137Y	na	na	na	na	na	na	na	na	na	na	5	na	na	8	8	na	na	10	7	13	na	na	na	na	na	na	na	na	na	na	na	na	na	na	na	na	na	na	na	na	na	na	na	na	na	na	na	na	na
F140*	na	na	na	na	na	na	na	na	na	na	138	56	26	6	2	9	5	7	7	9	na	na	na	na	na	na	na	na	na	na	92	27	6	na	8	na	na	na	na	na	na	na	na	na	na	na	na	na	na
F140A	na	na	na	na	na	na	na	na	na	na	1584	1315	865	375	58	483	566	846	1235	924	na	na	na	na	na	na	na	na	na	na	1435	2307	453	482	616	822	625	747	761	790	na	na	na	na	na	na	na	na	na
F140C	na	na	na	na	na	na	na	na	na	na	29	8	31	26	17	4	5	na	9	20	na	na	na	na	na	na	na	na	na	na	na	na	na	na	na	na	na	na	na	na	na	na	na	na	na	na	na	na	na
F140D	na	na	na	na	na	na	na	na	na	na	1054	793	504	248	49	437	494	479	387	642	na	na	na	na	na	na	na	na	na	na	706	1278	269	345	344	436	484	505	415	449	na	na	na	na	na	na	na	na	na
F140E	na	na	na	na	na	na	na	na	na	na	1352	966	741	321	46	416	676	586	652	747	na	na	na	na	na	na	na	na	na	na	1578	2087	477	461	467	698	803	774	782	681	na	na	na	na	na	na	na	na	na
F140G	na	na	na	na	na	na	na	na	na	na	1	1952	1210	552	102	743	1092	1006	1351	1654	na	na	na	na	na	na	na	na	na	na	1992	3401	690	662	781	985	1117	1254	1112	1200	na	na	na	na	na	na	na	na	na
F140H	na	na	na	na	na	na	na	na	na	na	1230	1108	571	281	38	307	249	725	534	594	na	na	na	na	na	na	na	na	na	na	1005	1427	326	275	679	508	465	539	444	456	na	na	na	na	na	na	na	na	na
F140I	na	na	na	na	na	na	na	na	na	na	6	29	39	17	7	4	27	5	16	16	na	na	na	na	na	na	na	na	na	na	na	9	na	na	na	na	na	na	na	na	na	na	na	na	na	na	na	na	na
F140K	na	na	na	na	na	na	na	na	na	na	1	1261	805	521	70	643	696	764	999	1038	na	na	na	na	na	na	na	na	na	na	1494	2261	469	488	573	754	806	894	894	813	na	na	na	na	na	na	na	na	na
F140L	na	na	na	na	na	na	na	na	na	na	20	495	377	236	52	212	222	319	514	461	na	na	na	na	na	na	na	na	na	na	519	866	203	163	247	255	278	354	268	328	na	na	na	na	na	na	na	na	na
F140M	na	na	na	na	na	na	na	na	na	na	2033	1655	1025	349	70	531	882	997	1028	1104	na	na	na	na	na	na	na	na	na	na	1957	2513	482	397	584	771	909	909	867	860	na	na	na	na	na	na	na	na	na
F140N	na	na	na	na	na	na	na	na	na	na	1	1898	1469	630	96	838	1437	1231	1714	1566	na	na	na	na	na	na	na	na	na	na	2345	3639	756	771	950	1218	1341	1450	1336	1497	na	na	na	na	na	na	na	na	na
F140P	na	na	na	na	na	na	na	na	na	na	5171	4617	2747	1161	198	1632	2386	2440	3230	3316	na	na	na	na	na	na	na	na	na	na	13	7434	1747	1707	1842	2414	2626	2878	2733	2682	na	na	na	na	na	na	na	na	na
F140Q	na	na	na	na	na	na	na	na	na	na	304	225	163	37	13	95	235	152	204	174	na	na	na	na	na	na	na	na	na	na	314	514	120	129	106	140	191	163	151	173	na	na	na	na	na	na	na	na	na
F140R	na	na	na	na	na	na	na	na	na	na	1430	1371	914	414	46	600	687	862	789	956	na	na	na	na	na	na	na	na	na	na	37	2183	381	433	481	759	856	921	761	844	na	na	na	na	na	na	na	na	na
F140S	na	na	na	na	na	na	na	na	na	na	2	1285	654	393	69	486	838	885	839	930	na	na	na	na	na	na	na	na	na	na	1341	2235	331	459	467	600	639	635	640	664	na	na	na	na	na	na	na	na	na
F140T	na	na	na	na	na	na	na	na	na	na	3617	2980	1957	1027	180	1003	1983	2041	2088	2559	na	na	na	na	na	na	na	na	na	na	16	5089	1054	943	1546	1720	1802	2056	1717	1890	na	na	na	na	na	na	na	na	na
F140V	na	na	na	na	na	na	na	na	na	na	13	41	1327	598	118	928	899	1094	1226	1569	na	na	na	na	na	na	na	na	na	na	1842	3127	557	514	725	997	1100	1250	1124	1174	na	na	na	na	na	na	na	na	na
F140W	na	na	na	na	na	na	na	na	na	na	433	226	208	83	16	160	277	128	209	250	na	na	na	na	na	na	na	na	na	na	393	519	94	84	101	119	122	136	126	146	na	na	na	na	na	na	na	na	na
F140Y	na	na	na	na	na	na	na	na	na	na	4	na	6	na	5	5	na	na	na	na	na	na	na	na	na	na	na	na	na	na	na	na	na	na	na	na	na	na	na	na	na	na	na	na	na	na	na	na	na
F153*	na	na	na	na	na	na	na	na	na	na	232	74	21	5	2	9	19	9	na	7	na	na	na	na	na	na	na	na	na	na	159	45	17	na	9	na	6	na	na	na	na	na	na	na	na	na	na	na	na
F153A	na	na	na	na	na	na	na	na	na	na	817	453	255	128	13	82	95	133	104	108	na	na	na	na	na	na	na	na	na	na	640	819	160	312	149	176	184	107	105	76	na	na	na	na	na	na	na	na	na
F153C	na	na	na	na	na	na	na	na	na	na	1	376	276	118	15	93	133	158	319	223	na	na	na	na	na	na	na	na	na	na	421	660	110	137	211	165	174	131	131	175	na	na	na	na	na	na	na	na	na
F153D	na	na	na	na	na	na	na	na	na	na	241	62	30	21	na	na	na	10	na	na	na	na	na	na	na	na	na	na	na	na	162	90	49	22	7	9	na	na	na	na	na	na	na	na	na	na	na	na	na
F153E	na	na	na	na	na	na	na	na	na	na	1693	768	532	189	20	155	182	221	306	139	na	na	na	na	na	na	na	na	na	na	1516	1313	319	298	264	331	248	192	133	165	na	na	na	na	na	na	na	na	na
F153G	na	na	na	na	na	na	na	na	na	na	1228	206	176	38	5	32	68	56	108	64	na	na	na	na	na	na	na	na	na	na	881	286	70	91	148	128	58	42	40	57	na	na	na	na	na	na	na	na	na
F153H	na	na	na	na	na	na	na	na	na	na	1	891	625	279	29	229	267	328	362	474	na	na	na	na	na	na	na	na	na	na	1168	1693	294	463	426	476	537	478	334	381	na	na	na	na	na	na	na	na	na
F153I	na	na	na	na	na	na	na	na	na	na	1022	850	566	203	40	284	486	260	247	396	na	na	na	na	na	na	na	na	na	na	827	1349	240	349	271	429	390	402	284	296	na	na	na	na	na	na	na	na	na
F153K	na	na	na	na	na	na	na	na	na	na	3581	1814	1301	473	73	454	703	440	402	466	na	na	na	na	na	na	na	na	na	na	15	3241	766	650	653	778	675	481	370	302	na	na	na	na	na	na	na	na	na
F153L	na	na	na	na	na	na	na	na	na	na	5	7	1481	635	132	764	923	1106	1318	1647	na	na	na	na	na	na	na	na	na	na	13	3913	728	775	981	1129	1395	1405	1300	1305	na	na	na	na	na	na	na	na	na
F153M	na	na	na	na	na	na	na	na	na	na	1	1287	799	341	51	307	482	527	707	775	na	na	na	na	na	na	na	na	na	na	1372	1928	421	357	795	599	615	693	558	676	na	na	na	na	na	na	na	na	na
F153N	na	na	na	na	na	na	na	na	na	na	2535	1563	1083	401	74	596	509	595	819	687	na	na	na	na	na	na	na	na	na	na	2473	2850	661	597	707	851	851	768	713	608	na	na	na	na	na	na	na	na	na
F153P	na	na	na	na	na	na	na	na	na	na	785	106	72	29	3	6	na	18	7	14	na	na	na	na	na	na	na	na	na	na	421	150	17	30	113	14	9	14	6	6	na	na	na	na	na	na	na	na	na
F153Q	na	na	na	na	na	na	na	na	na	na	1190	783	517	240	33	252	159	209	243	286	na	na	na	na	na	na	na	na	na	na	1120	1454	319	295	288	403	330	340	271	225	na	na	na	na	na	na	na	na	na
F153R	na	na	na	na	na	na	na	na	na	na	3486	2426	1424	706	87	594	499	600	539	591	na	na	na	na	na	na	na	na	na	na	9	3583	724	616	905	909	826	705	502	493	na	na	na	na	na	na	na	na	na
F153S	na	na	na	na	na	na	na	na	na	na	3	982	642	281	47	368	349	180	170	349	na	na	na	na	na	na	na	na	na	na	1838	1842	350	355	325	428	415	329	194	242	na	na	na	na	na	na	na	na	na
F153T	na	na	na	na	na	na	na	na	na	na	2034	1677	923	414	74	408	654	761	630	728	na	na	na	na	na	na	na	na	na	na	1898	2570	611	496	599	778	739	660	574	629	na	na	na	na	na	na	na	na	na
F153V	na	na	na	na	na	na	na	na	na	na	4	3058	1795	708	104	774	1310	971	1198	1369	na	na	na	na	na	na	na	na	na	na	3650	4983	970	1093	1060	1401	1399	1306	1101	999	na	na	na	na	na	na	na	na	na
F153W	na	na	na	na	na	na	na	na	na	na	1623	1191	770	316	55	441	374	360	1177	498	na	na	na	na	na	na	na	na	na	na	34	1929	409	494	487	518	608	592	402	391	na	na	na	na	na	na	na	na	na
F153Y	na	na	na	na	na	na	na	na	na	na	1	919	418	273	38	229	175	300	224	343	na	na	na	na	na	na	na	na	na	na	974	1176	264	240	309	375	362	382	294	314	na	na	na	na	na	na	na	na	na
F31*	821	na	145	9	11	35	13	na	na	47	na	na	na	na	na	na	na	na	na	na	1044	100	45	26	38	17	59	6	na	na	na	na	na	na	na	na	na	na	na	na	358	92	15	31	24	46	14	25	29
F31A	2917	na	1516	152	100	43	64	na	37	98	na	na	na	na	na	na	na	na	na	na	3608	736	314	301	195	109	185	56	39	44	na	na	na	na	na	na	na	na	na	na	2680	696	366	250	253	131	136	72	66
F31C	5	5	1916	315	292	294	193	143	136	405	na	na	na	na	na	na	na	na	na	na	2516	1389	663	627	710	448	454	211	234	162	na	na	na	na	na	na	na	na	na	na	1964	13	482	475	523	329	444	359	241
F31D	304	na	39	16	17	32	na	na	na	na	na	na	na	na	na	na	na	na	na	na	743	164	43	37	38	24	13	17	na	na	na	na	na	na	na	na	na	na	na	na	195	83	30	20	20	26	49	10	10
F31E	1497	na	1400	72	46	12	41	26	14	206	na	na	na	na	na	na	na	na	na	na	2095	244	62	109	66	38	43	26	13	21	na	na	na	na	na	na	na	na	na	na	1412	166	62	50	38	69	43	27	43
F31G	1678	na	419	34	26	40	32	20	na	131	na	na	na	na	na	na	na	na	na	na	2495	325	117	105	100	70	154	35	72	75	na	na	na	na	na	na	na	na	na	na	8	158	56	67	45	38	49	36	25
F31H	2162	na	1250	172	144	109	35	34	5	509	na	na	na	na	na	na	na	na	na	na	2454	992	387	282	234	165	132	68	28	45	na	na	na	na	na	na	na	na	na	na	1942	909	369	374	386	333	244	127	105
F31I	911	na	783	65	61	33	na	29	12	199	na	na	na	na	na	na	na	na	na	na	1564	458	154	152	98	92	73	42	34	34	na	na	na	na	na	na	na	na	na	na	1302	413	251	152	114	101	91	49	23
F31K	675	na	144	11	19	28	na	14	na	78	na	na	na	na	na	na	na	na	na	na	1191	206	60	73	69	27	56	20	11	69	na	na	na	na	na	na	na	na	na	na	468	115	32	27	41	7	17	10	11
F31L	7	38	8266	2154	2530	1791	2154	1728	1667	13347	na	na	na	na	na	na	na	na	na	na	11008	9374	3191	3373	4114	3419	4633	2143	2715	2791	na	na	na	na	na	na	na	na	na	na	11	9774	2709	2547	3220	3049	3032	2494	2285
F31M	2535	na	4841	1215	1250	1263	1128	948	1147	5983	na	na	na	na	na	na	na	na	na	na	4712	4183	1760	1810	2262	2146	2263	1289	1507	1773	na	na	na	na	na	na	na	na	na	na	3704	4059	1530	1448	1697	1641	1949	1605	1396
F31N	486	na	101	19	9	10	na	14	7	81	na	na	na	na	na	na	na	na	na	na	666	89	44	30	48	39	21	15	na	21	na	na	na	na	na	na	na	na	na	na	216	57	28	22	37	31	24	18	7
F31P	1285	na	331	39	27	na	67	24	26	409	na	na	na	na	na	na	na	na	na	na	2175	327	103	216	119	96	229	35	84	112	na	na	na	na	na	na	na	na	na	na	723	146	79	43	31	54	40	36	38
F31Q	420	na	217	21	25	24	11	50	na	115	na	na	na	na	na	na	na	na	na	na	1287	145	70	72	37	28	48	12	16	22	na	na	na	na	na	na	na	na	na	na	653	110	26	37	36	17	37	30	12
F31R	683	na	387	43	27	24	21	31	7	na	na	na	na	na	na	na	na	na	na	na	2311	323	149	104	136	68	115	28	52	57	na	na	na	na	na	na	na	na	na	na	614	210	67	53	44	40	30	19	na
F31S	1024	na	462	28	37	na	46	58	54	349	na	na	na	na	na	na	na	na	na	na	1933	210	73	76	68	58	25	35	54	136	na	na	na	na	na	na	na	na	na	na	696	185	46	43	78	57	34	37	28
F31T	2216	na	1060	103	93	29	85	122	12	287	na	na	na	na	na	na	na	na	na	na	3416	659	309	218	127	216	423	41	39	67	na	na	na	na	na	na	na	na	na	na	2673	660	317	232	107	61	148	185	53
F31V	6084	na	7418	1351	1106	787	604	477	361	3110	na	na	na	na	na	na	na	na	na	na	9768	4968	2248	2134	2182	1726	1606	756	810	595	na	na	na	na	na	na	na	na	na	na	7710	5965	2519	2038	2024	1814	1767	1352	1026
F31W	877	na	182	5	na	na	na	na	na	na	na	na	na	na	na	na	na	na	na	na	1037	111	45	28	52	12	na	19	32	11	na	na	na	na	na	na	na	na	na	na	372	53	17	20	na	na	na	na	na
F31Y	17	6	2168	803	1100	1072	1050	792	1162	5512	na	na	na	na	na	na	na	na	na	na	3100	3248	1180	1333	1845	1508	1896	1022	1345	1199	na	na	na	na	na	na	na	na	na	na	2141	2754	904	903	1175	1183	1276	1103	955
G121*	na	na	na	na	na	na	na	na	na	na	2	110	40	14	5	6	24	21	12	9	na	na	na	na	na	na	na	na	na	na	260	62	8	28	6	26	13	11	na	na	na	na	na	na	na	na	na	na	na
G121A	na	na	na	na	na	na	na	na	na	na	14	1582	906	344	82	431	336	172	188	224	na	na	na	na	na	na	na	na	na	na	1568	2347	408	433	434	530	447	357	230	225	na	na	na	na	na	na	na	na	na
G121C	na	na	na	na	na	na	na	na	na	na	6	18	na	na	9	10	na	na	8	na	na	na	na	na	na	na	na	na	na	na	na	na	na	na	na	na	na	na	na	na	na	na	na	na	na	na	na	na	na
G121D	na	na	na	na	na	na	na	na	na	na	1	na	na	na	na	na	na	na	na	na	na	na	na	na	na	na	na	na	na	na	na	na	na	na	na	na	na	na	na	na	na	na	na	na	na	na	na	na	na
G121E	na	na	na	na	na	na	na	na	na	na	1895	688	370	179	13	64	71	68	33	34	na	na	na	na	na	na	na	na	na	na	1465	907	330	203	197	202	114	57	30	14	na	na	na	na	na	na	na	na	na
G121F	na	na	na	na	na	na	na	na	na	na	340	259	110	30	5	11	na	na	na	na	na	na	na	na	na	na	na	na	na	na	343	269	69	46	30	34	19	na	na	na	na	na	na	na	na	na	na	na	na
G121H	na	na	na	na	na	na	na	na	na	na	613	296	191	98	19	59	41	47	34	21	na	na	na	na	na	na	na	na	na	na	401	552	169	143	149	119	132	62	38	20	na	na	na	na	na	na	na	na	na
G121I	na	na	na	na	na	na	na	na	na	na	275	24	13	na	na	na	na	na	na	na	na	na	na	na	na	na	na	na	na	na	172	33	8	6	na	17	na	na	na	na	na	na	na	na	na	na	na	na	na
G121K	na	na	na	na	na	na	na	na	na	na	3444	1114	1060	407	34	191	494	175	144	121	na	na	na	na	na	na	na	na	na	na	9	1565	694	635	443	445	322	153	52	51	na	na	na	na	na	na	na	na	na
G121L	na	na	na	na	na	na	na	na	na	na	918	126	83	18	3	20	19	26	26	7	na	na	na	na	na	na	na	na	na	na	560	150	33	31	31	36	39	22	17	9	na	na	na	na	na	na	na	na	na
G121M	na	na	na	na	na	na	na	na	na	na	1542	541	399	158	17	41	44	60	46	40	na	na	na	na	na	na	na	na	na	na	1076	657	264	213	170	185	109	58	51	29	na	na	na	na	na	na	na	na	na
G121N	na	na	na	na	na	na	na	na	na	na	1428	767	384	162	16	42	134	51	na	27	na	na	na	na	na	na	na	na	na	na	1032	724	258	251	180	179	196	54	41	27	na	na	na	na	na	na	na	na	na
G121P	na	na	na	na	na	na	na	na	na	na	3331	1518	1068	453	36	262	183	102	104	79	na	na	na	na	na	na	na	na	na	na	2521	2384	665	536	422	470	311	219	99	91	na	na	na	na	na	na	na	na	na
G121Q	na	na	na	na	na	na	na	na	na	na	1122	637	328	210	15	183	46	60	80	34	na	na	na	na	na	na	na	na	na	na	1044	773	213	177	163	205	132	57	73	45	na	na	na	na	na	na	na	na	na
G121R	na	na	na	na	na	na	na	na	na	na	33	32	798	272	49	164	180	263	145	119	na	na	na	na	na	na	na	na	na	na	8	1593	597	392	276	372	257	112	91	92	na	na	na	na	na	na	na	na	na
G121S	na	na	na	na	na	na	na	na	na	na	1	1320	643	319	26	453	108	113	42	119	na	na	na	na	na	na	na	na	na	na	1683	1504	437	315	295	422	314	182	140	102	na	na	na	na	na	na	na	na	na
G121T	na	na	na	na	na	na	na	na	na	na	2607	1036	615	188	28	92	122	124	35	45	na	na	na	na	na	na	na	na	na	na	1954	1322	548	347	440	351	218	135	64	34	na	na	na	na	na	na	na	na	na
G121V	na	na	na	na	na	na	na	na	na	na	9	35	800	294	33	583	251	54	88	43	na	na	na	na	na	na	na	na	na	na	1952	1774	489	341	580	287	214	145	51	63	na	na	na	na	na	na	na	na	na
G121W	na	na	na	na	na	na	na	na	na	na	1236	502	387	141	16	96	74	57	45	25	na	na	na	na	na	na	na	na	na	na	1110	881	281	194	146	210	149	86	46	23	na	na	na	na	na	na	na	na	na
G121Y	na	na	na	na	na	na	na	na	na	na	449	209	152	94	9	71	86	21	26	55	na	na	na	na	na	na	na	na	na	na	410	339	128	60	56	101	67	36	37	22	na	na	na	na	na	na	na	na	na
G15*	224	na	111	14	na	na	na	na	na	na	na	na	na	na	na	na	na	na	na	na	724	83	20	35	26	22	11	18	27	24	na	na	na	na	na	na	na	na	na	na	246	54	17	7	9	na	14	8	8
G15A	1030	na	713	195	159	64	48	103	73	2399	na	na	na	na	na	na	na	na	na	na	1572	822	349	352	359	325	161	117	117	112	na	na	na	na	na	na	na	na	na	na	13	998	385	340	323	288	311	211	133
G15C	11	na	na	na	na	na	na	na	na	na	na	na	na	na	na	na	na	na	na	na	na	na	na	na	na	na	na	na	na	na	na	na	na	na	na	na	na	na	na	na	7	na	na	na	na	na	na	na	na
G15D	na	na	na	na	na	na	na	na	na	na	na	na	na	na	na	na	na	na	na	na	14	na	na	na	na	na	na	na	na	na	na	na	na	na	na	na	na	na	na	na	na	na	na	na	na	na	na	na	na
G15E	699	na	243	21	16	na	18	16	24	124	na	na	na	na	na	na	na	na	na	na	1228	132	65	48	51	34	30	12	66	42	na	na	na	na	na	na	na	na	na	na	519	124	67	37	22	7	47	47	33
G15F	1346	na	132	16	15	63	23	na	na	40	na	na	na	na	na	na	na	na	na	na	1033	170	43	54	62	25	31	21	na	26	na	na	na	na	na	na	na	na	na	na	5	90	41	36	44	19	10	9	na
G15H	178	na	54	na	8	23	12	na	12	201	na	na	na	na	na	na	na	na	na	na	449	77	19	14	17	13	12	na	na	na	na	na	na	na	na	na	na	na	na	na	168	37	23	6	na	na	17	na	na
G15I	233	na	82	na	na	na	na	26	na	na	na	na	na	na	na	na	na	na	na	na	300	39	21	na	33	na	9	na	27	12	na	na	na	na	na	na	na	na	na	na	138	17	17	13	7	na	na	na	na
G15K	638	na	132	27	27	na	38	na	19	105	na	na	na	na	na	na	na	na	na	na	1169	109	72	40	56	55	45	17	26	41	na	na	na	na	na	na	na	na	na	na	309	99	24	31	24	na	25	16	na
G15L	1520	na	453	46	40	14	7	20	44	426	na	na	na	na	na	na	na	na	na	na	2720	382	128	122	130	90	108	32	43	59	na	na	na	na	na	na	na	na	na	na	746	235	73	64	48	49	62	37	32
G15M	790	na	56	13	na	na	na	na	na	na	na	na	na	na	na	na	na	na	na	na	672	70	27	19	27	12	na	10	na	na	na	na	na	na	na	na	na	na	na	na	120	46	23	16	18	9	11	10	na
G15N	452	na	73	17	22	62	18	na	8	349	na	na	na	na	na	na	na	na	na	na	822	113	50	34	46	10	71	17	18	27	na	na	na	na	na	na	na	na	na	na	382	73	32	35	39	na	12	13	9
G15P	1435	na	493	31	21	18	31	39	14	na	na	na	na	na	na	na	na	na	na	na	2268	244	81	97	100	71	109	46	38	27	na	na	na	na	na	na	na	na	na	na	549	209	71	52	74	57	42	27	45
G15Q	209	na	115	9	na	70	18	na	na	na	na	na	na	na	na	na	na	na	na	na	623	71	51	19	26	29	na	7	na	na	na	na	na	na	na	na	na	na	na	na	216	50	16	na	28	17	21	na	na
G15R	968	na	232	5	19	17	13	na	13	na	na	na	na	na	na	na	na	na	na	na	1592	215	41	66	75	48	75	21	34	30	na	na	na	na	na	na	na	na	na	na	401	151	32	35	59	22	32	na	7
G15S	2637	na	1308	222	234	37	95	31	40	192	na	na	na	na	na	na	na	na	na	na	3616	1317	503	402	390	225	261	100	60	117	na	na	na	na	na	na	na	na	na	na	3165	1256	598	459	352	471	336	163	127
G15T	606	na	316	41	26	na	23	na	na	na	na	na	na	na	na	na	na	na	na	na	1468	196	54	68	65	31	76	6	17	na	na	na	na	na	na	na	na	na	na	na	1026	143	65	40	7	na	9	28	10
G15V	782	na	82	12	8	na	na	na	na	269	na	na	na	na	na	na	na	na	na	na	703	125	34	36	37	23	62	21	13	22	na	na	na	na	na	na	na	na	na	na	277	70	13	16	8	52	20	na	12
G15W	637	na	195	12	12	13	22	30	29	213	na	na	na	na	na	na	na	na	na	na	1102	135	46	37	41	34	18	16	22	37	na	na	na	na	na	na	na	na	na	na	278	97	17	17	45	12	16	25	36
G15Y	103	na	8	7	6	148	6	15	28	164	na	na	na	na	na	na	na	na	na	na	338	77	17	22	13	15	na	na	21	28	na	na	na	na	na	na	na	na	na	na	81	25	na	12	10	na	na	10	20
G43*	na	na	na	na	na	na	na	na	na	na	63	86	28	7	1	na	na	na	18	8	738	108	73	52	50	44	30	28	na	36	na	na	na	na	na	na	na	na	na	na	338	96	75	36	37	7	41	20	13
G43A	na	na	na	na	na	na	na	na	na	na	101	196	67	60	9	28	na	15	7	9	1257	419	422	242	261	107	137	56	106	45	na	na	na	na	na	na	na	na	na	na	1075	391	284	236	146	185	127	165	50
G43D	na	na	na	na	na	na	na	na	na	na	1	na	na	na	1	na	na	na	na	na	7	na	na	na	na	na	na	na	na	na	na	na	na	na	na	na	na	na	na	na	na	na	na	na	na	na	na	na	na
G43E	na	na	na	na	na	na	na	na	na	na	62	99	27	37	na	19	59	na	na	29	877	155	97	55	65	70	18	31	38	24	na	na	na	na	na	na	na	na	na	na	375	81	11	38	21	34	25	16	18
G43F	na	na	na	na	na	na	na	na	na	na	21	33	na	na	na	8	na	na	31	na	253	49	24	32	47	22	14	12	na	na	na	na	na	na	na	na	na	na	na	na	73	38	12	12	na	na	9	na	na
G43H	na	na	na	na	na	na	na	na	na	na	20	19	11	6	na	na	na	6	na	na	117	49	18	19	10	na	na	7	24	na	na	na	na	na	na	na	na	na	na	na	121	32	6	na	na	20	na	9	na
G43I	na	na	na	na	na	na	na	na	na	na	16	22	7	na	na	na	na	na	na	na	127	52	17	17	17	13	na	14	15	29	na	na	na	na	na	na	na	na	na	na	162	28	26	11	na	12	na	10	na
G43K	na	na	na	na	na	na	na	na	na	na	65	129	47	19	3	23	na	25	na	29	889	207	118	69	83	56	47	32	31	63	na	na	na	na	na	na	na	na	na	na	478	126	59	49	48	30	23	35	30
G43L	na	na	na	na	na	na	na	na	na	na	96	188	48	13	6	14	57	45	18	28	1523	275	154	194	150	76	68	70	47	96	na	na	na	na	na	na	na	na	na	na	959	227	86	85	89	83	66	64	29
G43M	na	na	na	na	na	na	na	na	na	na	45	49	13	8	3	10	na	na	na	9	542	120	49	75	58	25	11	25	42	30	na	na	na	na	na	na	na	na	na	na	272	51	38	38	17	16	25	21	17
G43N	na	na	na	na	na	na	na	na	na	na	33	51	na	14	na	na	21	14	16	na	247	80	54	46	29	18	18	7	na	36	na	na	na	na	na	na	na	na	na	na	207	57	11	18	39	na	23	15	11
G43P	na	na	na	na	na	na	na	na	na	na	22	36	10	12	na	13	na	na	na	na	229	53	25	31	17	12	34	18	na	16	na	na	na	na	na	na	na	na	na	na	217	45	36	8	na	na	11	18	na
G43Q	na	na	na	na	na	na	na	na	na	na	29	41	10	7	2	na	na	na	na	na	328	82	39	37	55	24	na	22	56	10	na	na	na	na	na	na	na	na	na	na	185	66	20	25	17	53	11	23	na
G43R	na	na	na	na	na	na	na	na	na	na	101	167	48	22	8	21	11	37	63	40	1063	212	156	91	85	45	173	42	36	47	na	na	na	na	na	na	na	na	na	na	827	149	88	66	50	48	47	34	41
G43S	na	na	na	na	na	na	na	na	na	na	101	182	66	42	8	12	39	45	47	33	1169	301	224	214	144	66	68	70	38	114	na	na	na	na	na	na	na	na	na	na	942	227	137	138	89	113	94	64	37
G43T	na	na	na	na	na	na	na	na	na	na	30	45	6	6	1	17	na	na	na	na	528	72	40	25	50	14	12	30	na	67	na	na	na	na	na	na	na	na	na	na	196	72	14	21	27	11	na	20	9
G43V	na	na	na	na	na	na	na	na	na	na	67	102	10	16	4	na	na	na	16	na	1134	152	113	73	63	67	53	53	77	75	na	na	na	na	na	na	na	na	na	na	473	142	38	65	51	24	46	43	45
G43W	na	na	na	na	na	na	na	na	na	na	76	108	30	19	2	17	11	6	18	17	738	176	139	120	89	50	241	45	77	20	na	na	na	na	na	na	na	na	na	na	580	166	36	52	47	71	22	62	31
G43Y	na	na	na	na	na	na	na	na	na	na	19	28	7	8	2	na	14	22	na	na	110	47	31	32	22	14	15	9	60	31	na	na	na	na	na	na	na	na	na	na	214	38	na	26	9	na	na	16	na
G51*	na	na	na	na	na	na	na	na	na	na	27	30	13	17	1	na	29	na	15	na	303	64	53	31	28	34	16	18	14	19	na	na	na	na	na	na	na	na	na	na	150	41	33	16	26	20	21	26	16
G51A	na	na	na	na	na	na	na	na	na	na	198	2468	622	799	78	742	847	737	528	944	2723	2580	1321	1196	1275	1183	1633	1106	1515	1384	na	na	na	na	na	na	na	na	na	na	1967	2162	849	826	1265	1107	1300	1233	1150
G51C	na	na	na	na	na	na	na	na	na	na	153	1920	563	490	75	477	586	683	664	668	1872	1863	955	946	1061	1036	1154	784	1111	1231	na	na	na	na	na	na	na	na	na	na	1460	1653	765	727	1069	1037	1064	1049	952
G51D	na	na	na	na	na	na	na	na	na	na	332	4409	1213	1139	154	1206	1465	1454	1545	1966	5164	4725	2741	2275	2459	2382	2567	2222	3174	3632	na	na	na	na	na	na	na	na	na	na	3007	3970	1718	1524	2309	2363	2239	2444	2283
G51E	na	na	na	na	na	na	na	na	na	na	165	2210	693	626	90	726	1166	717	904	1129	1839	2261	1242	1014	1303	1156	1830	1028	1549	1697	na	na	na	na	na	na	na	na	na	na	1569	1979	858	885	1290	1222	1265	1341	1229
G51F	na	na	na	na	na	na	na	na	na	na	263	3031	946	1050	145	903	1135	877	866	1211	3723	3081	1983	1598	1729	1835	1823	1448	1990	1785	na	na	na	na	na	na	na	na	na	na	2298	2943	1561	1289	1923	1733	1919	1655	1450
G51H	na	na	na	na	na	na	na	na	na	na	210	2812	779	753	94	792	941	1113	1214	1405	2722	2872	1787	1480	1659	1562	1746	1607	2022	2274	na	na	na	na	na	na	na	na	na	na	2087	2595	1053	1139	1573	1643	1697	1764	1701
G51I	na	na	na	na	na	na	na	na	na	na	191	2836	808	865	98	1031	794	938	1073	1346	2256	3033	1746	1454	1668	1625	1736	1390	2125	1998	na	na	na	na	na	na	na	na	na	na	2103	2638	1157	1115	1829	1301	1614	1791	1515
G51K	na	na	na	na	na	na	na	na	na	na	234	3201	933	1065	143	1124	1424	1121	1087	1639	3194	3378	1903	1873	1876	1836	3024	1657	2451	2708	na	na	na	na	na	na	na	na	na	na	2534	3095	1217	1217	1959	1895	1775	1789	1862
G51L	na	na	na	na	na	na	na	na	na	na	414	4355	1406	1417	159	1303	1475	1291	1212	1710	8	4995	3256	2572	2699	2637	3248	2049	2929	3013	na	na	na	na	na	na	na	na	na	na	3840	4733	1902	1858	2977	3011	2809	2593	2264
G51M	na	na	na	na	na	na	na	na	na	na	91	1161	387	390	58	350	410	342	430	549	1430	1318	962	745	719	724	968	602	724	752	na	na	na	na	na	na	na	na	na	na	1123	1247	500	519	753	905	797	703	664
G51N	na	na	na	na	na	na	na	na	na	na	514	6868	2091	2268	244	2056	2836	2532	2886	3318	7174	7191	4244	3537	4341	3866	4720	3421	4681	4943	na	na	na	na	na	na	na	na	na	na	5284	6531	3002	2891	4258	3842	4069	3862	3728
G51P	na	na	na	na	na	na	na	na	na	na	119	1679	488	449	56	581	722	595	778	806	2186	1851	1081	882	859	864	1178	862	1152	1281	na	na	na	na	na	na	na	na	na	na	1193	1509	664	615	788	807	934	877	826
G51Q	na	na	na	na	na	na	na	na	na	na	96	1185	356	373	56	386	419	371	525	628	748	1198	711	585	640	638	1139	591	915	904	na	na	na	na	na	na	na	na	na	na	961	1141	544	515	696	640	765	746	764
G51R	na	na	na	na	na	na	na	na	na	na	403	5472	1692	1584	226	1633	2238	1756	2200	2372	5735	5645	3571	2998	3313	3056	3978	2801	3993	4485	na	na	na	na	na	na	na	na	na	na	3721	5215	2285	1928	3293	2910	3147	3268	2888
G51S	na	na	na	na	na	na	na	na	na	na	412	5466	1530	1570	203	1418	2260	1846	1861	2397	4905	5652	3409	3116	3182	3172	3690	2570	3272	4021	na	na	na	na	na	na	na	na	na	na	3813	5319	2255	2134	3216	3037	3167	3059	2741
G51T	na	na	na	na	na	na	na	na	na	na	189	2694	882	739	96	771	909	1008	1726	1462	2558	2640	1481	1509	1404	1409	2292	1325	1859	2496	na	na	na	na	na	na	na	na	na	na	1923	2365	1027	917	1577	1316	1525	1424	1337
G51V	na	na	na	na	na	na	na	na	na	na	421	4756	1365	1376	170	1460	1802	1566	1928	2047	8	4959	2955	2740	2797	2737	3822	2328	3038	3521	na	na	na	na	na	na	na	na	na	na	3263	4710	2062	1892	2597	2693	2547	2819	2479
G51W	na	na	na	na	na	na	na	na	na	na	216	2567	779	812	88	746	783	629	1030	821	3038	2936	1727	1566	1492	1562	1871	1162	1573	1775	na	na	na	na	na	na	na	na	na	na	2196	2718	1090	1048	1695	1496	1503	1608	1223
G51Y	na	na	na	na	na	na	na	na	na	na	229	2743	882	824	115	832	1187	855	639	1140	3081	3252	1868	1573	1867	1848	2295	1413	1974	2009	na	na	na	na	na	na	na	na	na	na	2300	2903	1387	1211	2599	1451	1907	1751	1544
G56*	na	na	na	na	na	na	na	na	na	na	21	51	na	na	3	17	na	na	na	na	226	40	18	21	16	16	12	15	24	15	na	na	na	na	na	na	na	na	na	na	162	31	26	17	8	9	12	16	11
G56A	na	na	na	na	na	na	na	na	na	na	101	1503	430	445	55	353	601	418	423	624	1430	1369	789	680	741	695	1167	653	835	816	na	na	na	na	na	na	na	na	na	na	993	1251	491	453	701	1120	656	706	616
G56C	na	na	na	na	na	na	na	na	na	na	44	656	202	175	25	141	154	180	297	241	620	682	407	333	301	309	437	291	399	354	na	na	na	na	na	na	na	na	na	na	409	596	234	222	313	226	319	324	264
G56D	na	na	na	na	na	na	na	na	na	na	132	1599	471	625	63	422	730	603	469	687	1397	1586	860	799	832	877	1242	740	1083	1108	na	na	na	na	na	na	na	na	na	na	1213	1492	682	555	794	729	838	782	782
G56E	na	na	na	na	na	na	na	na	na	na	287	3462	1071	1054	124	827	1409	1023	1120	1286	3329	3184	2042	1538	1705	1760	2229	1421	1626	1982	na	na	na	na	na	na	na	na	na	na	2726	3118	1403	1394	1966	1871	1866	1629	1403
G56F	na	na	na	na	na	na	na	na	na	na	54	772	264	237	35	250	246	260	240	287	793	770	503	373	459	420	495	395	489	442	na	na	na	na	na	na	na	na	na	na	555	739	231	310	454	356	410	371	333
G56H	na	na	na	na	na	na	na	na	na	na	103	1368	397	424	47	351	308	433	448	617	1540	1374	843	673	773	659	929	648	907	1148	na	na	na	na	na	na	na	na	na	na	1078	1337	515	476	837	561	770	748	652
G56I	na	na	na	na	na	na	na	na	na	na	103	825	345	350	31	241	123	185	133	242	1076	1244	597	455	519	505	723	417	397	531	na	na	na	na	na	na	na	na	na	na	784	935	460	415	573	563	337	399	301
G56K	na	na	na	na	na	na	na	na	na	na	274	3178	1011	913	134	799	844	907	840	1208	2959	3173	1865	1602	1755	1689	2687	1480	1644	1973	na	na	na	na	na	na	na	na	na	na	2460	3046	1307	1290	1730	1980	1549	1651	1303
G56L	na	na	na	na	na	na	na	na	na	na	256	2787	878	782	116	731	1160	733	840	1066	2911	2861	1611	1450	1528	1342	2688	1137	1698	1648	na	na	na	na	na	na	na	na	na	na	1920	2655	982	1062	1560	1458	1646	1285	1201
G56M	na	na	na	na	na	na	na	na	na	na	196	2240	662	599	80	620	1021	665	681	674	2079	2099	1262	986	1176	1064	1258	996	1245	1158	na	na	na	na	na	na	na	na	na	na	1788	2010	872	762	1161	948	999	1031	891
G56N	na	na	na	na	na	na	na	na	na	na	102	1154	369	307	48	436	365	514	489	562	1806	1188	724	585	622	558	740	624	927	757	na	na	na	na	na	na	na	na	na	na	897	1142	540	443	695	664	676	661	602
G56P	na	na	na	na	na	na	na	na	na	na	38	79	24	63	1	32	na	13	44	28	271	116	88	79	53	21	56	13	27	9	na	na	na	na	na	na	na	na	na	na	238	106	63	46	43	37	38	26	12
G56Q	na	na	na	na	na	na	na	na	na	na	156	1773	535	572	73	626	669	394	433	619	1913	1625	923	784	955	834	1149	736	1018	1065	na	na	na	na	na	na	na	na	na	na	1132	1487	653	659	1012	1013	874	819	651
G56R	na	na	na	na	na	na	na	na	na	na	297	3155	968	880	123	883	1041	872	1072	1186	3338	3243	1801	1666	1725	1788	2025	1411	1758	1833	na	na	na	na	na	na	na	na	na	na	2181	3008	1221	1245	1706	1856	1695	1539	1462
G56S	na	na	na	na	na	na	na	na	na	na	123	1375	429	448	54	425	501	383	406	555	1423	1461	778	716	833	751	1154	685	1149	1038	na	na	na	na	na	na	na	na	na	na	1224	1320	527	555	696	833	737	833	638
G56T	na	na	na	na	na	na	na	na	na	na	116	1488	453	462	51	348	518	407	379	521	1549	1507	960	839	835	747	1021	673	695	902	na	na	na	na	na	na	na	na	na	na	1273	1414	653	449	850	944	758	780	604
G56V	na	na	na	na	na	na	na	na	na	na	421	4287	1477	1317	148	1236	1472	909	1014	1361	4907	4705	2758	2325	2562	2413	3134	1965	2145	2687	na	na	na	na	na	na	na	na	na	na	3521	4287	2101	1826	2676	2157	2121	2054	1755
G56W	na	na	na	na	na	na	na	na	na	na	55	731	262	209	23	115	192	207	249	320	691	865	394	381	481	349	600	304	429	438	na	na	na	na	na	na	na	na	na	na	461	704	329	271	427	544	382	329	313
G56Y	na	na	na	na	na	na	na	na	na	na	72	1088	393	303	31	256	361	358	226	385	1042	1012	700	451	550	511	613	467	478	588	na	na	na	na	na	na	na	na	na	na	687	894	385	331	555	562	467	567	454
G67*	na	na	na	na	na	na	na	na	na	na	59	67	20	14	3	21	na	12	na	22	582	108	33	58	48	20	21	39	27	42	na	na	na	na	na	na	na	na	na	na	242	74	29	23	20	60	36	29	15
G67A	na	na	na	na	na	na	na	na	na	na	145	2008	710	616	86	594	855	799	1214	1125	1397	1692	872	756	789	803	1367	898	1642	1273	na	na	na	na	na	na	na	na	na	na	1155	1641	512	653	933	836	876	1022	980
G67C	na	na	na	na	na	na	na	na	na	na	28	530	122	153	22	161	248	362	470	267	475	493	222	191	224	313	289	200	274	442	na	na	na	na	na	na	na	na	na	na	254	390	111	130	228	319	198	270	249
G67D	na	na	na	na	na	na	na	na	na	na	139	2051	644	645	80	613	1001	820	861	1156	1739	1787	905	745	836	900	2381	904	1708	1348	na	na	na	na	na	na	na	na	na	na	1033	1532	468	485	785	766	843	949	926
G67E	na	na	na	na	na	na	na	na	na	na	373	5200	1516	1587	199	1685	2228	2440	2691	3304	4285	4849	2372	2256	2465	2240	2732	2350	3717	4171	na	na	na	na	na	na	na	na	na	na	2963	4474	1584	1577	2428	2280	2554	2837	2675
G67F	na	na	na	na	na	na	na	na	na	na	39	467	147	109	16	111	209	140	132	184	321	416	214	258	159	212	181	153	247	210	na	na	na	na	na	na	na	na	na	na	340	512	193	172	241	238	253	259	229
G67H	na	na	na	na	na	na	na	na	na	na	50	585	183	175	25	154	314	177	242	185	586	595	257	267	246	249	312	240	343	217	na	na	na	na	na	na	na	na	na	na	470	577	239	188	296	292	326	281	216
G67I	na	na	na	na	na	na	na	na	na	na	90	1342	467	312	63	384	574	605	505	583	1407	1302	555	562	494	443	619	584	733	838	na	na	na	na	na	na	na	na	na	na	684	1099	350	372	529	560	594	690	534
G67K	na	na	na	na	na	na	na	na	na	na	1038	13056	4060	4131	484	4014	4726	3908	4624	4979	12180	12625	6687	6058	6336	6230	7781	5330	6560	7553	na	na	na	na	na	na	na	na	na	na	9436	11924	4394	4266	6016	5468	5942	5483	4956
G67L	na	na	na	na	na	na	na	na	na	na	159	2577	794	1091	100	686	1459	1027	928	1355	2169	2528	1233	1159	1235	1199	1570	1117	1664	1707	na	na	na	na	na	na	na	na	na	na	1443	2356	1018	831	1251	1176	1410	1264	1084
G67M	na	na	na	na	na	na	na	na	na	na	153	2111	628	551	95	853	1184	1042	1325	1224	18	2244	1151	972	1020	1137	1431	1123	1587	1712	na	na	na	na	na	na	na	na	na	na	1419	1899	664	706	1157	1107	1069	1077	1060
G67N	na	na	na	na	na	na	na	na	na	na	453	5959	1794	1781	221	1958	2436	2586	2277	2734	5168	5459	2969	2634	2636	2498	3250	2514	3364	3964	na	na	na	na	na	na	na	na	na	na	3628	5242	1996	1896	2886	2734	2671	2720	2677
G67P	na	na	na	na	na	na	na	na	na	na	50	893	272	304	43	256	395	555	808	528	797	859	414	340	439	410	624	479	727	953	na	na	na	na	na	na	na	na	na	na	542	777	293	234	459	436	413	417	447
G67Q	na	na	na	na	na	na	na	na	na	na	69	887	262	236	48	262	254	214	308	368	872	989	542	398	427	526	511	444	550	622	na	na	na	na	na	na	na	na	na	na	724	858	296	295	513	496	513	417	410
G67R	na	na	na	na	na	na	na	na	na	na	493	4795	1495	1494	205	1430	2695	1229	761	1385	4806	5058	2792	2283	2524	2442	2841	2039	2310	2056	na	na	na	na	na	na	na	na	na	na	4271	4974	1786	1763	2815	2531	2754	2183	1962
G67S	na	na	na	na	na	na	na	na	na	na	135	2113	721	632	91	644	780	861	1214	1172	2111	1993	1007	873	985	954	1068	1115	1561	1463	na	na	na	na	na	na	na	na	na	na	1199	1754	643	650	974	1082	1067	1073	1064
G67T	na	na	na	na	na	na	na	na	na	na	160	2708	853	952	95	923	1541	1167	1702	1661	1732	2527	1345	1045	1309	1290	1422	1267	1802	1955	na	na	na	na	na	na	na	na	na	na	1559	2355	830	858	1232	1240	1347	1320	1398
G67V	na	na	na	na	na	na	na	na	na	na	383	5535	1746	1568	215	1716	2004	2283	3008	3001	3173	5378	2666	2316	2202	2322	2730	2362	3138	3953	na	na	na	na	na	na	na	na	na	na	2894	4537	1496	1599	2197	2216	2492	2506	2459
G67W	na	na	na	na	na	na	na	na	na	na	218	2401	712	754	107	638	782	631	449	748	3138	3103	1418	1205	1341	1089	1477	997	1050	1027	na	na	na	na	na	na	na	na	na	na	1901	2528	914	950	1143	1153	1247	1109	911
G67Y	na	na	na	na	na	na	na	na	na	na	57	804	271	305	36	232	554	202	384	295	825	815	418	367	394	369	579	365	477	554	na	na	na	na	na	na	na	na	na	na	602	801	309	297	459	506	407	318	334
G86*	312	67	na	19	20	12	11	17	na	57	na	na	na	na	na	na	na	na	na	na	na	na	na	na	na	na	na	na	na	na	198	39	na	na	na	na	na	na	na	na	na	na	na	na	na	na	na	na	na
G86A	1473	2011	na	706	893	777	1192	1001	667	6283	na	na	na	na	na	na	na	na	na	na	na	na	na	na	na	na	na	na	na	na	2492	1764	475	435	646	516	514	650	570	658	na	na	na	na	na	na	na	na	na
G86C	678	1158	na	496	516	431	604	308	525	3298	na	na	na	na	na	na	na	na	na	na	na	na	na	na	na	na	na	na	na	na	1678	1245	317	313	263	350	386	400	323	383	na	na	na	na	na	na	na	na	na
G86D	612	821	na	319	432	315	579	223	422	2916	na	na	na	na	na	na	na	na	na	na	na	na	na	na	na	na	na	na	na	na	1168	912	344	287	288	364	323	381	324	381	na	na	na	na	na	na	na	na	na
G86E	1638	1898	na	826	1004	1173	1134	1187	784	7440	na	na	na	na	na	na	na	na	na	na	na	na	na	na	na	na	na	na	na	na	2802	1817	667	624	528	702	762	959	751	847	na	na	na	na	na	na	na	na	na
G86F	2004	3239	na	1468	1851	1432	1762	1904	1502	13262	na	na	na	na	na	na	na	na	na	na	na	na	na	na	na	na	na	na	na	na	4123	3729	1040	866	860	1018	1118	1248	945	802	na	na	na	na	na	na	na	na	na
G86H	1299	1602	na	796	992	868	998	1195	964	7211	na	na	na	na	na	na	na	na	na	na	na	na	na	na	na	na	na	na	na	na	2767	2147	719	695	906	955	860	1138	1002	1013	na	na	na	na	na	na	na	na	na
G86I	1347	1793	na	803	1156	949	1414	1791	882	7957	na	na	na	na	na	na	na	na	na	na	na	na	na	na	na	na	na	na	na	na	2548	2407	824	626	863	765	783	827	723	821	na	na	na	na	na	na	na	na	na
G86K	2084	3552	na	1802	2075	2591	2127	2275	1826	15105	na	na	na	na	na	na	na	na	na	na	na	na	na	na	na	na	na	na	na	na	5514	4363	1462	1604	1561	1814	1836	2233	1745	1872	na	na	na	na	na	na	na	na	na
G86L	7459	10343	na	4595	5903	6063	5897	6019	5022	39045	na	na	na	na	na	na	na	na	na	na	na	na	na	na	na	na	na	na	na	na	13801	10690	3259	2597	2920	3522	3759	4400	3718	3479	na	na	na	na	na	na	na	na	na
G86M	1692	2451	na	1227	1472	1036	1417	1825	1301	12297	na	na	na	na	na	na	na	na	na	na	na	na	na	na	na	na	na	na	na	na	3500	3210	843	944	774	1044	1121	1439	1216	1134	na	na	na	na	na	na	na	na	na
G86N	1402	2014	na	982	1102	1544	979	1141	936	7080	na	na	na	na	na	na	na	na	na	na	na	na	na	na	na	na	na	na	na	na	2970	2632	766	682	704	948	1016	1244	983	968	na	na	na	na	na	na	na	na	na
G86P	5077	7001	na	3326	4279	4814	5041	6091	5224	44751	na	na	na	na	na	na	na	na	na	na	na	na	na	na	na	na	na	na	na	na	11014	11538	3279	2868	3625	3887	4362	4989	4886	5356	na	na	na	na	na	na	na	na	na
G86Q	1471	1902	na	808	1108	868	1375	1232	891	10800	na	na	na	na	na	na	na	na	na	na	na	na	na	na	na	na	na	na	na	na	2839	2140	658	654	922	888	963	1087	1013	1009	na	na	na	na	na	na	na	na	na
G86R	5027	6803	na	3163	3869	4792	4133	4415	3606	32376	na	na	na	na	na	na	na	na	na	na	na	na	na	na	na	na	na	na	na	na	8964	7348	2135	1754	2020	2137	2491	2835	2733	2951	na	na	na	na	na	na	na	na	na
G86S	2642	3736	na	1657	2228	2657	2113	2332	2014	15190	na	na	na	na	na	na	na	na	na	na	na	na	na	na	na	na	na	na	na	na	5683	3775	1390	1338	1830	1760	1822	2127	1834	1973	na	na	na	na	na	na	na	na	na
G86T	2543	3827	na	1579	1970	1889	2257	2562	1926	15126	na	na	na	na	na	na	na	na	na	na	na	na	na	na	na	na	na	na	na	na	5007	5494	1320	1169	1246	1571	1653	2073	1712	1641	na	na	na	na	na	na	na	na	na
G86V	2904	3956	na	1777	2178	2107	2517	2594	1840	16686	na	na	na	na	na	na	na	na	na	na	na	na	na	na	na	na	na	na	na	na	5994	4127	1209	1131	1078	1296	1459	1637	1519	1505	na	na	na	na	na	na	na	na	na
G86W	1148	1876	na	709	746	1098	758	518	567	4260	na	na	na	na	na	na	na	na	na	na	na	na	na	na	na	na	na	na	na	na	2654	2345	420	350	472	364	298	348	273	362	na	na	na	na	na	na	na	na	na
G86Y	604	1001	na	393	471	534	473	510	390	4195	na	na	na	na	na	na	na	na	na	na	na	na	na	na	na	na	na	na	na	na	1276	1087	344	302	400	423	455	519	409	348	na	na	na	na	na	na	na	na	na
G95*	389	107	na	18	23	23	17	6	23	134	na	na	na	na	na	na	na	na	na	na	na	na	na	na	na	na	na	na	na	na	238	na	12	9	15	na	na	10	8	na	na	na	na	na	na	na	na	na	na
G95A	124	15	na	8	na	na	na	34	11	na	na	na	na	na	na	na	na	na	na	na	na	na	na	na	na	na	na	na	na	na	86	na	na	na	na	na	na	na	na	na	na	na	na	na	na	na	na	na	na
G95E	322	129	na	24	14	27	11	85	na	61	na	na	na	na	na	na	na	na	na	na	na	na	na	na	na	na	na	na	na	na	208	11	na	na	na	na	na	na	na	na	na	na	na	na	na	na	na	na	na
G95F	446	119	na	37	34	15	na	14	31	92	na	na	na	na	na	na	na	na	na	na	na	na	na	na	na	na	na	na	na	na	304	11	na	na	na	na	na	na	na	na	na	na	na	na	na	na	na	na	na
G95H	292	126	na	19	10	18	21	na	na	232	na	na	na	na	na	na	na	na	na	na	na	na	na	na	na	na	na	na	na	na	175	11	7	na	5	na	na	na	na	na	na	na	na	na	na	na	na	na	na
G95I	420	102	na	12	23	58	8	9	na	na	na	na	na	na	na	na	na	na	na	na	na	na	na	na	na	na	na	na	na	na	207	29	na	na	na	na	na	na	na	na	na	na	na	na	na	na	na	na	na
G95K	672	228	na	28	34	na	7	32	6	87	na	na	na	na	na	na	na	na	na	na	na	na	na	na	na	na	na	na	na	na	363	42	27	10	9	7	22	23	7	11	na	na	na	na	na	na	na	na	na
G95L	2295	374	na	89	91	58	59	86	10	263	na	na	na	na	na	na	na	na	na	na	na	na	na	na	na	na	na	na	na	na	1006	261	37	32	32	26	16	37	8	7	na	na	na	na	na	na	na	na	na
G95M	446	65	na	15	16	64	na	27	9	86	na	na	na	na	na	na	na	na	na	na	na	na	na	na	na	na	na	na	na	na	166	30	na	na	na	6	na	na	na	na	na	na	na	na	na	na	na	na	na
G95N	275	41	na	25	19	56	17	6	8	na	na	na	na	na	na	na	na	na	na	na	na	na	na	na	na	na	na	na	na	na	157	257	na	na	10	na	na	na	na	na	na	na	na	na	na	na	na	na	na
G95P	1806	395	na	76	75	99	33	58	31	484	na	na	na	na	na	na	na	na	na	na	na	na	na	na	na	na	na	na	na	na	703	109	5	11	na	11	10	20	na	na	na	na	na	na	na	na	na	na	na
G95Q	528	121	na	10	11	39	na	19	12	46	na	na	na	na	na	na	na	na	na	na	na	na	na	na	na	na	na	na	na	na	191	18	na	na	na	na	na	na	na	na	na	na	na	na	na	na	na	na	na
G95R	755	154	na	44	88	18	25	65	10	na	na	na	na	na	na	na	na	na	na	na	na	na	na	na	na	na	na	na	na	na	347	34	na	na	na	na	6	na	na	na	na	na	na	na	na	na	na	na	na
G95S	567	121	na	28	21	22	6	7	17	na	na	na	na	na	na	na	na	na	na	na	na	na	na	na	na	na	na	na	na	na	275	6	na	na	na	na	80	na	na	na	na	na	na	na	na	na	na	na	na
G95T	357	82	na	39	21	19	8	35	na	106	na	na	na	na	na	na	na	na	na	na	na	na	na	na	na	na	na	na	na	na	232	38	na	5	na	na	na	na	na	na	na	na	na	na	na	na	na	na	na
G95V	552	225	na	13	7	na	na	na	6	42	na	na	na	na	na	na	na	na	na	na	na	na	na	na	na	na	na	na	na	na	212	23	na	na	na	na	na	na	na	na	na	na	na	na	na	na	na	na	na
G95W	658	115	na	8	20	na	na	na	na	na	na	na	na	na	na	na	na	na	na	na	na	na	na	na	na	na	na	na	na	na	247	24	na	na	na	na	na	na	na	na	na	na	na	na	na	na	na	na	na
G95Y	334	60	na	5	6	19	6	36	18	200	na	na	na	na	na	na	na	na	na	na	na	na	na	na	na	na	na	na	na	na	116	289	na	na	na	na	na	na	na	na	na	na	na	na	na	na	na	na	na
G96*	560	145	na	44	32	60	35	13	13	37	na	na	na	na	na	na	na	na	na	na	na	na	na	na	na	na	na	na	na	na	237	10	5	na	na	na	na	na	na	na	na	na	na	na	na	na	na	na	na
G96A	283	123	na	21	7	25	31	na	na	na	na	na	na	na	na	na	na	na	na	na	na	na	na	na	na	na	na	na	na	na	352	11	17	7	30	na	na	na	na	na	na	na	na	na	na	na	na	na	na
G96C	na	na	na	33	na	na	6	na	na	138	na	na	na	na	na	na	na	na	na	na	na	na	na	na	na	na	na	na	na	na	na	na	na	na	na	na	na	na	na	na	na	na	na	na	na	na	na	na	na
G96E	688	160	na	12	29	38	7	98	14	na	na	na	na	na	na	na	na	na	na	na	na	na	na	na	na	na	na	na	na	na	384	na	5	na	8	na	6	7	na	na	na	na	na	na	na	na	na	na	na
G96F	501	73	na	13	18	21	13	16	na	51	na	na	na	na	na	na	na	na	na	na	na	na	na	na	na	na	na	na	na	na	203	13	11	7	na	na	na	na	na	na	na	na	na	na	na	na	na	na	na
G96H	81	23	na	11	8	na	12	na	na	na	na	na	na	na	na	na	na	na	na	na	na	na	na	na	na	na	na	na	na	na	44	na	na	na	na	na	na	na	na	na	na	na	na	na	na	na	na	na	na
G96I	116	52	na	8	12	14	30	21	7	na	na	na	na	na	na	na	na	na	na	na	na	na	na	na	na	na	na	na	na	na	107	17	na	9	na	na	na	na	na	na	na	na	na	na	na	na	na	na	na
G96K	1417	339	na	53	67	174	35	68	36	336	na	na	na	na	na	na	na	na	na	na	na	na	na	na	na	na	na	na	na	na	716	20	15	30	16	10	11	18	9	13	na	na	na	na	na	na	na	na	na
G96L	1095	209	na	51	57	66	82	116	22	89	na	na	na	na	na	na	na	na	na	na	na	na	na	na	na	na	na	na	na	na	716	51	20	36	21	8	20	11	11	18	na	na	na	na	na	na	na	na	na
G96M	767	190	na	26	44	na	na	46	5	59	na	na	na	na	na	na	na	na	na	na	na	na	na	na	na	na	na	na	na	na	373	29	17	5	na	17	14	9	6	na	na	na	na	na	na	na	na	na	na
G96N	194	41	na	12	16	na	na	na	na	na	na	na	na	na	na	na	na	na	na	na	na	na	na	na	na	na	na	na	na	na	111	21	na	na	na	na	na	na	na	na	na	na	na	na	na	na	na	na	na
G96P	383	96	na	6	8	72	38	9	na	70	na	na	na	na	na	na	na	na	na	na	na	na	na	na	na	na	na	na	na	na	115	na	na	na	na	na	na	na	na	na	na	na	na	na	na	na	na	na	na
G96Q	607	119	na	21	24	na	11	28	na	na	na	na	na	na	na	na	na	na	na	na	na	na	na	na	na	na	na	na	na	na	244	9	na	8	na	7	6	na	na	na	na	na	na	na	na	na	na	na	na
G96R	1425	411	na	92	77	8	na	49	31	109	na	na	na	na	na	na	na	na	na	na	na	na	na	na	na	na	na	na	na	na	862	143	19	22	na	13	16	12	6	na	na	na	na	na	na	na	na	na	na
G96S	345	82	na	23	7	29	11	na	na	na	na	na	na	na	na	na	na	na	na	na	na	na	na	na	na	na	na	na	na	na	272	263	na	na	11	na	na	na	na	na	na	na	na	na	na	na	na	na	na
G96T	429	88	na	22	19	40	22	23	na	na	na	na	na	na	na	na	na	na	na	na	na	na	na	na	na	na	na	na	na	na	205	9	10	6	na	na	na	6	na	na	na	na	na	na	na	na	na	na	na
G96V	873	192	na	55	22	na	40	117	31	163	na	na	na	na	na	na	na	na	na	na	na	na	na	na	na	na	na	na	na	na	402	24	6	15	24	8	9	7	na	na	na	na	na	na	na	na	na	na	na
G96W	521	165	na	26	21	8	18	6	na	na	na	na	na	na	na	na	na	na	na	na	na	na	na	na	na	na	na	na	na	na	298	38	na	na	na	na	6	na	na	na	na	na	na	na	na	na	na	na	na
G96Y	304	61	na	7	10	na	15	na	na	na	na	na	na	na	na	na	na	na	na	na	na	na	na	na	na	na	na	na	na	na	63	40	na	na	na	na	na	na	na	na	na	na	na	na	na	na	na	na	na
G97*	279	70	na	39	35	42	na	26	6	150	na	na	na	na	na	na	na	na	na	na	na	na	na	na	na	na	na	na	na	na	207	24	8	23	7	16	18	30	17	24	na	na	na	na	na	na	na	na	na
G97A	741	981	na	437	495	526	413	1043	480	4318	na	na	na	na	na	na	na	na	na	na	na	na	na	na	na	na	na	na	na	na	1851	1703	718	846	720	919	901	997	942	1101	na	na	na	na	na	na	na	na	na
G97C	564	1355	54	433	459	360	379	254	265	1681	na	na	na	na	na	na	na	na	na	na	na	na	na	na	na	na	na	na	na	na	2271	2282	700	822	987	877	727	531	502	546	na	na	na	na	na	na	na	na	na
G97D	769	1211	na	430	600	264	416	309	406	2216	na	na	na	na	na	na	na	na	na	na	na	na	na	na	na	na	na	na	na	na	2321	2039	849	948	964	968	885	868	632	629	na	na	na	na	na	na	na	na	na
G97E	1627	2615	na	1025	1302	1247	1041	851	1004	7600	na	na	na	na	na	na	na	na	na	na	na	na	na	na	na	na	na	na	na	na	5247	3596	1885	2036	2643	2227	2013	1919	2008	2107	na	na	na	na	na	na	na	na	na
G97F	1874	2941	na	1095	1211	777	728	739	442	3179	na	na	na	na	na	na	na	na	na	na	na	na	na	na	na	na	na	na	na	na	5429	3759	2013	1788	1642	1952	1579	1556	1037	1154	na	na	na	na	na	na	na	na	na
G97H	2252	2942	na	1180	1347	1188	787	583	471	3660	na	na	na	na	na	na	na	na	na	na	na	na	na	na	na	na	na	na	na	na	5490	17	1906	2045	1731	2143	1807	1715	1370	1331	na	na	na	na	na	na	na	na	na
G97I	289	342	na	65	55	129	13	31	19	104	na	na	na	na	na	na	na	na	na	na	na	na	na	na	na	na	na	na	na	na	884	108	133	84	59	61	39	58	20	14	na	na	na	na	na	na	na	na	na
G97K	4149	6647	na	2414	2994	2267	2162	1740	1417	10464	na	na	na	na	na	na	na	na	na	na	na	na	na	na	na	na	na	na	na	na	12216	15	4052	5019	4450	4776	4303	3972	3460	3788	na	na	na	na	na	na	na	na	na
G97L	4526	7743	na	2426	2455	1560	1689	1137	938	9863	na	na	na	na	na	na	na	na	na	na	na	na	na	na	na	na	na	na	na	na	12638	9728	4289	3935	3601	4198	3387	2962	2193	2296	na	na	na	na	na	na	na	na	na
G97M	1722	2521	na	1160	1287	1294	797	646	789	4287	na	na	na	na	na	na	na	na	na	na	na	na	na	na	na	na	na	na	na	na	5637	4882	1841	2126	2723	2253	2137	2044	1653	1784	na	na	na	na	na	na	na	na	na
G97N	2769	4085	na	1553	1963	1345	1368	1176	1088	8634	na	na	na	na	na	na	na	na	na	na	na	na	na	na	na	na	na	na	na	na	7387	6142	2606	2887	2780	3176	3095	2917	2785	2845	na	na	na	na	na	na	na	na	na
G97P	6292	7206	na	1649	1544	964	675	529	344	1771	na	na	na	na	na	na	na	na	na	na	na	na	na	na	na	na	na	na	na	na	16197	9606	3312	3409	2738	2393	1850	1518	728	727	na	na	na	na	na	na	na	na	na
G97Q	1918	2634	na	1206	1454	1758	1476	1412	1311	10146	na	na	na	na	na	na	na	na	na	na	na	na	na	na	na	na	na	na	na	na	5346	4831	1887	2078	2296	2287	2227	2920	2511	2920	na	na	na	na	na	na	na	na	na
G97R	3960	5237	na	2215	2702	1968	2064	2887	1874	13747	na	na	na	na	na	na	na	na	na	na	na	na	na	na	na	na	na	na	na	na	10174	7206	3335	3615	4049	4002	3956	3997	3462	4062	na	na	na	na	na	na	na	na	na
G97S	2184	3827	na	1650	1939	1272	1756	1708	1458	11813	na	na	na	na	na	na	na	na	na	na	na	na	na	na	na	na	na	na	na	na	6943	4924	2657	2744	2688	2999	2993	2987	2579	2800	na	na	na	na	na	na	na	na	na
G97T	1905	3171	na	1213	1539	1191	1328	1171	964	7203	na	na	na	na	na	na	na	na	na	na	na	na	na	na	na	na	na	na	na	na	5991	5084	2157	2466	2291	2639	2357	2445	2060	2359	na	na	na	na	na	na	na	na	na
G97V	2241	2314	na	534	496	237	227	72	76	673	na	na	na	na	na	na	na	na	na	na	na	na	na	na	na	na	na	na	na	na	3906	2417	785	875	745	864	529	501	397	284	na	na	na	na	na	na	na	na	na
G97W	920	1486	na	377	268	314	76	na	na	na	na	na	na	na	na	na	na	na	na	na	na	na	na	na	na	na	na	na	na	na	2848	1717	643	602	1523	662	530	356	198	207	na	na	na	na	na	na	na	na	na
G97Y	811	1815	na	487	519	488	355	307	96	1566	na	na	na	na	na	na	na	na	na	na	na	na	na	na	na	na	na	na	na	na	2665	2294	849	899	764	896	686	682	569	539	na	na	na	na	na	na	na	na	na
H114*	556	76	na	8	15	19	27	na	13	57	na	na	na	na	na	na	na	na	na	na	na	na	na	na	na	na	na	na	na	na	344	35	41	59	26	32	28	43	67	107	na	na	na	na	na	na	na	na	na
H114A	2556	4369	na	1569	2166	1880	1975	2140	3011	17671	na	na	na	na	na	na	na	na	na	na	na	na	na	na	na	na	na	na	na	na	5967	5795	1739	1474	2316	2287	2357	2450	2381	2478	na	na	na	na	na	na	na	na	na
H114C	626	795	na	353	496	418	465	492	715	5327	na	na	na	na	na	na	na	na	na	na	na	na	na	na	na	na	na	na	na	na	1435	1329	511	416	475	549	697	756	685	682	na	na	na	na	na	na	na	na	na
H114D	696	938	na	295	258	159	124	175	121	513	na	na	na	na	na	na	na	na	na	na	na	na	na	na	na	na	na	na	na	na	1636	9	255	247	189	257	286	163	153	115	na	na	na	na	na	na	na	na	na
H114E	1749	1978	na	819	1147	1126	1274	1570	981	14759	na	na	na	na	na	na	na	na	na	na	na	na	na	na	na	na	na	na	na	na	3418	3258	699	705	1112	909	1060	1085	1064	1057	na	na	na	na	na	na	na	na	na
H114F	1149	1320	na	708	957	538	813	1057	1034	8627	na	na	na	na	na	na	na	na	na	na	na	na	na	na	na	na	na	na	na	na	2124	1854	630	522	805	781	846	1009	762	961	na	na	na	na	na	na	na	na	na
H114G	5770	7406	na	2903	3520	2820	3309	2770	3384	22955	na	na	na	na	na	na	na	na	na	na	na	na	na	na	na	na	na	na	na	na	13676	10639	3526	3061	3412	4093	4088	3515	2968	2973	na	na	na	na	na	na	na	na	na
H114I	797	1367	na	685	1024	985	979	1053	905	11220	na	na	na	na	na	na	na	na	na	na	na	na	na	na	na	na	na	na	na	na	2400	2424	665	704	804	913	1145	1234	1086	1236	na	na	na	na	na	na	na	na	na
H114K	2771	3649	na	1819	2514	2234	3301	3038	4142	32824	na	na	na	na	na	na	na	na	na	na	na	na	na	na	na	na	na	na	na	na	6125	6164	1934	1587	1838	2130	2384	2904	3101	3321	na	na	na	na	na	na	na	na	na
H114L	3815	6178	na	3126	4510	4541	4870	6507	5748	52339	na	na	na	na	na	na	na	na	na	na	na	na	na	na	na	na	na	na	na	na	9935	8708	3339	3437	3115	4240	4999	5534	5351	5645	na	na	na	na	na	na	na	na	na
H114M	1690	2411	na	1169	1463	1239	1647	1609	2213	17061	na	na	na	na	na	na	na	na	na	na	na	na	na	na	na	na	na	na	na	na	3791	3623	1286	1162	1328	1615	1940	2034	2008	2012	na	na	na	na	na	na	na	na	na
H114N	1018	1970	na	905	1245	1217	1477	1253	1664	12655	na	na	na	na	na	na	na	na	na	na	na	na	na	na	na	na	na	na	na	na	2913	2423	1006	788	798	1012	1151	1376	1338	1457	na	na	na	na	na	na	na	na	na
H114P	2065	692	na	103	17	na	na	na	na	na	na	na	na	na	na	na	na	na	na	na	na	na	na	na	na	na	na	na	na	na	1943	91	50	64	23	16	24	56	24	na	na	na	na	na	na	na	na	na	na
H114Q	na	na	na	na	na	na	na	na	na	na	na	na	na	na	na	na	na	na	na	na	na	na	na	na	na	na	na	na	na	na	7	27	5	na	na	na	na	na	na	14	na	na	na	na	na	na	na	na	na
H114R	4109	5572	na	3046	4173	4269	4488	5303	5998	50520	na	na	na	na	na	na	na	na	na	na	na	na	na	na	na	na	na	na	na	na	10217	9670	3123	3385	3477	4458	4830	5762	5493	6042	na	na	na	na	na	na	na	na	na
H114S	3377	5472	na	2403	3148	2820	3013	3375	3203	29133	na	na	na	na	na	na	na	na	na	na	na	na	na	na	na	na	na	na	na	na	8436	6771	2658	2398	3169	3384	3789	4260	3842	3764	na	na	na	na	na	na	na	na	na
H114T	3365	3868	na	1991	2755	2302	3000	3404	2828	24649	na	na	na	na	na	na	na	na	na	na	na	na	na	na	na	na	na	na	na	na	6474	5097	2333	2142	2201	2779	3042	3246	3093	3201	na	na	na	na	na	na	na	na	na
H114V	3732	5954	na	2945	3888	4033	4624	4871	5023	43422	na	na	na	na	na	na	na	na	na	na	na	na	na	na	na	na	na	na	na	na	10086	12	3601	3173	3641	4583	5072	5802	5525	5778	na	na	na	na	na	na	na	na	na
H114W	1945	2862	na	1228	1691	1303	1759	1777	1851	14510	na	na	na	na	na	na	na	na	na	na	na	na	na	na	na	na	na	na	na	na	4954	3082	1442	1551	1536	2026	2208	2463	2323	2509	na	na	na	na	na	na	na	na	na
H114Y	745	831	na	567	748	694	586	917	630	5823	na	na	na	na	na	na	na	na	na	na	na	na	na	na	na	na	na	na	na	na	1554	890	509	673	599	660	734	835	789	851	na	na	na	na	na	na	na	na	na
H124*	na	na	na	na	na	na	na	na	na	na	152	70	31	14	1	5	10	33	20	29	na	na	na	na	na	na	na	na	na	na	83	40	7	9	na	6	na	na	na	7	na	na	na	na	na	na	na	na	na
H124A	na	na	na	na	na	na	na	na	na	na	1592	1277	811	407	62	558	561	738	879	1116	na	na	na	na	na	na	na	na	na	na	1249	2071	499	521	477	766	806	903	836	891	na	na	na	na	na	na	na	na	na
H124C	na	na	na	na	na	na	na	na	na	na	971	794	583	227	30	260	369	403	548	633	na	na	na	na	na	na	na	na	na	na	943	1307	418	273	321	543	506	567	623	605	na	na	na	na	na	na	na	na	na
H124D	na	na	na	na	na	na	na	na	na	na	8	598	425	237	38	251	312	342	282	413	na	na	na	na	na	na	na	na	na	na	861	1161	209	214	227	313	291	341	310	281	na	na	na	na	na	na	na	na	na
H124E	na	na	na	na	na	na	na	na	na	na	1	1755	1261	579	81	667	618	864	640	826	na	na	na	na	na	na	na	na	na	na	2428	2775	619	692	871	997	1010	925	791	697	na	na	na	na	na	na	na	na	na
H124F	na	na	na	na	na	na	na	na	na	na	7324	5583	3076	1673	223	1573	1724	1584	1261	1390	na	na	na	na	na	na	na	na	na	na	19	7652	2044	1877	2006	2755	2691	2390	1704	1655	na	na	na	na	na	na	na	na	na
H124G	na	na	na	na	na	na	na	na	na	na	1	3770	2650	1281	226	1711	2541	2175	2853	3098	na	na	na	na	na	na	na	na	na	na	82	7328	1957	1839	2114	2890	2960	2863	2739	3109	na	na	na	na	na	na	na	na	na
H124I	na	na	na	na	na	na	na	na	na	na	2	975	695	350	73	334	462	727	675	619	na	na	na	na	na	na	na	na	na	na	1321	1596	368	446	451	600	691	652	575	640	na	na	na	na	na	na	na	na	na
H124K	na	na	na	na	na	na	na	na	na	na	5114	4488	2954	1448	245	1877	2866	2572	2917	3363	na	na	na	na	na	na	na	na	na	na	18	7376	1731	1945	2078	2795	3044	3233	2822	2942	na	na	na	na	na	na	na	na	na
H124L	na	na	na	na	na	na	na	na	na	na	18	162	3943	1775	305	2511	2971	2499	2720	3069	na	na	na	na	na	na	na	na	na	na	24	8869	2128	2094	2707	2709	3194	3108	2578	2648	na	na	na	na	na	na	na	na	na
H124M	na	na	na	na	na	na	na	na	na	na	1	1597	997	416	77	496	845	766	1143	853	na	na	na	na	na	na	na	na	na	na	18	2401	628	601	1003	910	1008	1067	869	941	na	na	na	na	na	na	na	na	na
H124N	na	na	na	na	na	na	na	na	na	na	5	1670	1122	592	110	589	1032	1034	1241	1096	na	na	na	na	na	na	na	na	na	na	2142	2759	728	622	777	1043	996	1067	947	947	na	na	na	na	na	na	na	na	na
H124P	na	na	na	na	na	na	na	na	na	na	6	3471	2344	1095	152	1105	1548	1388	1813	2152	na	na	na	na	na	na	na	na	na	na	3879	5814	1326	1329	1457	1835	1926	1977	1655	1599	na	na	na	na	na	na	na	na	na
H124Q	na	na	na	na	na	na	na	na	na	na	20	92	45	29	15	na	36	11	16	32	na	na	na	na	na	na	na	na	na	na	14	na	na	na	na	na	na	na	6	na	na	na	na	na	na	na	na	na	na
H124R	na	na	na	na	na	na	na	na	na	na	1	3280	2308	1145	171	1500	1873	2022	2613	2693	na	na	na	na	na	na	na	na	na	na	4097	5860	1513	1545	1615	2160	2560	2372	2408	2368	na	na	na	na	na	na	na	na	na
H124S	na	na	na	na	na	na	na	na	na	na	4807	3921	2743	1311	204	1604	1726	2342	2725	3112	na	na	na	na	na	na	na	na	na	na	27	7017	1792	1910	2542	2639	2858	3167	2849	2972	na	na	na	na	na	na	na	na	na
H124T	na	na	na	na	na	na	na	na	na	na	2185	1975	1257	664	100	767	909	1031	1242	1374	na	na	na	na	na	na	na	na	na	na	12	3090	710	766	800	1115	1196	1368	1299	1295	na	na	na	na	na	na	na	na	na
H124V	na	na	na	na	na	na	na	na	na	na	2	2813	1630	930	120	895	1344	1379	1764	1840	na	na	na	na	na	na	na	na	na	na	40	4331	1069	1203	1394	1678	1868	1885	1624	1682	na	na	na	na	na	na	na	na	na
H124W	na	na	na	na	na	na	na	na	na	na	1514	1242	645	226	41	368	259	158	208	233	na	na	na	na	na	na	na	na	na	na	1586	1797	544	505	478	670	592	527	381	317	na	na	na	na	na	na	na	na	na
H124Y	na	na	na	na	na	na	na	na	na	na	4	854	550	281	40	329	203	187	190	243	na	na	na	na	na	na	na	na	na	na	1211	1353	364	306	325	478	440	393	276	276	na	na	na	na	na	na	na	na	na
H141*	na	na	na	na	na	na	na	na	na	na	250	41	29	11	2	10	na	13	na	na	na	na	na	na	na	na	na	na	na	na	111	44	8	na	7	6	na	na	na	na	na	na	na	na	na	na	na	na	na
H141A	na	na	na	na	na	na	na	na	na	na	2996	2098	1398	597	89	697	739	917	834	988	na	na	na	na	na	na	na	na	na	na	22	3434	736	671	675	987	1094	1021	779	827	na	na	na	na	na	na	na	na	na
H141C	na	na	na	na	na	na	na	na	na	na	625	435	260	142	22	190	128	217	97	205	na	na	na	na	na	na	na	na	na	na	626	765	142	182	105	260	211	217	170	172	na	na	na	na	na	na	na	na	na
H141D	na	na	na	na	na	na	na	na	na	na	1	na	11	na	1	na	na	na	na	na	na	na	na	na	na	na	na	na	na	na	na	na	na	na	na	na	na	na	na	na	na	na	na	na	na	na	na	na	na
H141E	na	na	na	na	na	na	na	na	na	na	1	2702	1613	689	101	603	986	879	662	1042	na	na	na	na	na	na	na	na	na	na	3956	4733	912	989	928	1220	1139	1049	678	757	na	na	na	na	na	na	na	na	na
H141F	na	na	na	na	na	na	na	na	na	na	4902	3661	2443	1264	149	986	1855	1407	1614	1959	na	na	na	na	na	na	na	na	na	na	5045	5595	1215	1340	1230	1643	1704	1677	1417	1451	na	na	na	na	na	na	na	na	na
H141G	na	na	na	na	na	na	na	na	na	na	2	9402	5706	2443	369	2736	3944	4072	4245	4731	na	na	na	na	na	na	na	na	na	na	32	14550	3048	3347	3917	4500	4724	4936	4219	4355	na	na	na	na	na	na	na	na	na
H141I	na	na	na	na	na	na	na	na	na	na	2257	1622	1049	370	82	617	1109	963	784	1026	na	na	na	na	na	na	na	na	na	na	2037	2770	457	559	820	722	803	637	596	599	na	na	na	na	na	na	na	na	na
H141K	na	na	na	na	na	na	na	na	na	na	3605	2961	1574	758	107	709	995	876	884	1140	na	na	na	na	na	na	na	na	na	na	3649	4321	952	912	941	1386	1310	1276	1001	921	na	na	na	na	na	na	na	na	na
H141L	na	na	na	na	na	na	na	na	na	na	4	4088	2242	894	138	922	1142	1030	994	1386	na	na	na	na	na	na	na	na	na	na	12	5710	1176	1256	1194	1404	1428	1230	938	940	na	na	na	na	na	na	na	na	na
H141M	na	na	na	na	na	na	na	na	na	na	2466	1945	1008	406	59	563	708	604	466	664	na	na	na	na	na	na	na	na	na	na	2056	2567	552	566	529	712	759	722	625	591	na	na	na	na	na	na	na	na	na
H141N	na	na	na	na	na	na	na	na	na	na	1	29	45	6	10	11	7	18	20	22	na	na	na	na	na	na	na	na	na	na	13	6	na	na	9	na	na	na	na	na	na	na	na	na	na	na	na	na	na
H141P	na	na	na	na	na	na	na	na	na	na	3	2870	626	224	46	226	280	173	181	249	na	na	na	na	na	na	na	na	na	na	2983	3052	224	285	229	301	278	170	190	159	na	na	na	na	na	na	na	na	na
H141Q	na	na	na	na	na	na	na	na	na	na	6	na	10	4	3	na	na	na	na	na	na	na	na	na	na	na	na	na	na	na	na	na	na	na	na	na	na	na	na	na	na	na	na	na	na	na	na	na	na
H141R	na	na	na	na	na	na	na	na	na	na	3	3172	1922	837	113	901	1053	1484	1245	1320	na	na	na	na	na	na	na	na	na	na	10	4992	1044	1055	952	1495	1614	1423	1202	1138	na	na	na	na	na	na	na	na	na
H141S	na	na	na	na	na	na	na	na	na	na	1	3033	1996	849	145	1003	2499	1345	1405	1536	na	na	na	na	na	na	na	na	na	na	31	5324	1106	1118	1100	1496	1528	1478	1254	1125	na	na	na	na	na	na	na	na	na
H141T	na	na	na	na	na	na	na	na	na	na	1	2917	1484	724	97	555	749	1269	641	1099	na	na	na	na	na	na	na	na	na	na	3234	4190	862	915	877	986	1006	958	805	808	na	na	na	na	na	na	na	na	na
H141V	na	na	na	na	na	na	na	na	na	na	8067	6542	3912	1760	257	1909	2362	2510	2910	3076	na	na	na	na	na	na	na	na	na	na	13	10354	2217	2205	2428	2910	2976	2970	2479	2493	na	na	na	na	na	na	na	na	na
H141W	na	na	na	na	na	na	na	na	na	na	1	1807	1122	690	71	687	650	789	665	896	na	na	na	na	na	na	na	na	na	na	9	3183	710	706	690	923	853	996	765	783	na	na	na	na	na	na	na	na	na
H141Y	na	na	na	na	na	na	na	na	na	na	3	6	11	4	8	na	9	5	na	12	na	na	na	na	na	na	na	na	na	na	8	na	na	na	na	na	na	na	na	na	na	na	na	na	na	na	na	na	na
H149*	na	na	na	na	na	na	na	na	na	na	195	49	8	5	na	4	na	8	na	na	na	na	na	na	na	na	na	na	na	na	92	26	na	na	na	na	na	na	na	na	na	na	na	na	na	na	na	na	na
H149A	na	na	na	na	na	na	na	na	na	na	2056	1721	782	602	56	425	421	435	373	436	na	na	na	na	na	na	na	na	na	na	2021	2263	550	415	535	629	548	565	365	405	na	na	na	na	na	na	na	na	na
H149C	na	na	na	na	na	na	na	na	na	na	1	698	511	238	31	198	218	268	313	297	na	na	na	na	na	na	na	na	na	na	1061	1188	233	271	260	367	352	371	263	313	na	na	na	na	na	na	na	na	na
H149D	na	na	na	na	na	na	na	na	na	na	na	na	6	na	1	na	na	na	na	na	na	na	na	na	na	na	na	na	na	na	na	na	na	na	na	na	na	na	na	na	na	na	na	na	na	na	na	na	na
H149E	na	na	na	na	na	na	na	na	na	na	1839	1285	684	324	50	357	615	569	317	532	na	na	na	na	na	na	na	na	na	na	2028	2255	412	427	440	590	607	558	410	435	na	na	na	na	na	na	na	na	na
H149F	na	na	na	na	na	na	na	na	na	na	2359	1520	773	303	31	214	434	177	98	113	na	na	na	na	na	na	na	na	na	na	2023	1953	459	480	434	444	351	278	110	101	na	na	na	na	na	na	na	na	na
H149G	na	na	na	na	na	na	na	na	na	na	1	5858	2850	1288	176	1160	1428	1253	943	1105	na	na	na	na	na	na	na	na	na	na	24	8115	1878	1654	1791	2026	1823	1494	1133	1064	na	na	na	na	na	na	na	na	na
H149I	na	na	na	na	na	na	na	na	na	na	1552	1220	561	275	32	217	290	273	398	250	na	na	na	na	na	na	na	na	na	na	1466	1551	294	334	362	357	477	277	200	191	na	na	na	na	na	na	na	na	na
H149K	na	na	na	na	na	na	na	na	na	na	2706	2307	1200	566	78	628	694	595	629	717	na	na	na	na	na	na	na	na	na	na	2764	3202	664	854	914	932	977	951	704	635	na	na	na	na	na	na	na	na	na
H149L	na	na	na	na	na	na	na	na	na	na	4	3545	1818	616	96	554	537	402	253	337	na	na	na	na	na	na	na	na	na	na	11	4546	908	877	956	985	880	578	397	333	na	na	na	na	na	na	na	na	na
H149M	na	na	na	na	na	na	na	na	na	na	1641	1272	505	231	19	212	168	158	109	113	na	na	na	na	na	na	na	na	na	na	1588	1437	314	346	337	448	319	229	178	141	na	na	na	na	na	na	na	na	na
H149N	na	na	na	na	na	na	na	na	na	na	1	na	11	6	8	na	na	na	6	10	na	na	na	na	na	na	na	na	na	na	na	6	na	na	na	na	na	na	na	na	na	na	na	na	na	na	na	na	na
H149P	na	na	na	na	na	na	na	na	na	na	5	2661	1488	622	119	610	1100	1230	1490	1592	na	na	na	na	na	na	na	na	na	na	2521	3374	779	842	812	987	1225	1319	1138	1206	na	na	na	na	na	na	na	na	na
H149Q	na	na	na	na	na	na	na	na	na	na	1	na	6	4	8	na	na	na	na	na	na	na	na	na	na	na	na	na	na	na	na	na	na	na	na	na	na	na	na	na	na	na	na	na	na	na	na	na	na
H149R	na	na	na	na	na	na	na	na	na	na	1	3388	1917	851	146	1063	1182	1306	1348	1686	na	na	na	na	na	na	na	na	na	na	10	5050	1183	1076	1249	1552	1647	1717	1442	1375	na	na	na	na	na	na	na	na	na
H149S	na	na	na	na	na	na	na	na	na	na	3641	2628	1369	538	93	753	688	533	429	457	na	na	na	na	na	na	na	na	na	na	3610	3623	812	716	933	1012	963	711	498	436	na	na	na	na	na	na	na	na	na
H149T	na	na	na	na	na	na	na	na	na	na	3118	2797	1507	630	107	834	1521	1270	1439	1381	na	na	na	na	na	na	na	na	na	na	3103	3929	876	854	973	1205	1365	1397	1243	1132	na	na	na	na	na	na	na	na	na
H149V	na	na	na	na	na	na	na	na	na	na	3858	3376	1884	756	143	1031	1299	1346	1743	1878	na	na	na	na	na	na	na	na	na	na	3528	4823	1038	1133	1127	1463	1537	1636	1495	1520	na	na	na	na	na	na	na	na	na
H149W	na	na	na	na	na	na	na	na	na	na	2192	1376	670	236	28	169	225	210	43	91	na	na	na	na	na	na	na	na	na	na	1966	1689	445	366	472	485	331	239	131	113	na	na	na	na	na	na	na	na	na
H149Y	na	na	na	na	na	na	na	na	na	na	na	na	na	na	3	na	na	na	na	na	na	na	na	na	na	na	na	na	na	na	na	na	na	na	na	na	na	na	na	na	na	na	na	na	na	na	na	na	na
H45*	na	na	na	na	na	na	na	na	na	na	27	37	17	12	na	na	na	na	na	na	303	65	36	41	19	32	na	21	49	na	na	na	na	na	na	na	na	na	na	na	123	57	29	15	29	30	8	23	12
H45A	na	na	na	na	na	na	na	na	na	na	145	2587	722	827	90	775	1172	1356	1846	2050	2495	2659	1501	1595	1415	1508	1912	1583	2373	3185	na	na	na	na	na	na	na	na	na	na	1735	2335	948	897	1262	1432	1610	1653	1834
H45C	na	na	na	na	na	na	na	na	na	na	178	1684	525	473	56	414	392	313	387	413	2445	2105	1313	1090	1252	1257	1181	747	1103	918	na	na	na	na	na	na	na	na	na	na	1381	2080	804	830	1027	1174	1116	911	803
H45D	na	na	na	na	na	na	na	na	na	na	180	1566	565	382	46	318	288	166	98	314	2179	1806	1160	1062	1091	847	1012	607	625	585	na	na	na	na	na	na	na	na	na	na	1652	1786	882	851	939	1043	857	674	548
H45E	na	na	na	na	na	na	na	na	na	na	211	2378	728	550	88	504	675	542	417	624	3120	2672	1806	1480	1523	1487	1388	1064	1182	1117	na	na	na	na	na	na	na	na	na	na	2173	2713	1161	1096	1548	1168	1406	1359	916
H45F	na	na	na	na	na	na	na	na	na	na	410	4329	1463	1528	132	1247	1237	966	785	1269	6013	5108	3216	2846	3109	2704	2841	1733	1995	1986	na	na	na	na	na	na	na	na	na	na	3902	5023	2123	2262	2696	2316	2396	1940	1573
H45G	na	na	na	na	na	na	na	na	na	na	684	11917	3597	3508	418	3120	3823	4101	4178	5161	18	12536	7230	7250	6951	6463	7741	5449	8188	9452	na	na	na	na	na	na	na	na	na	na	7372	11507	4586	4867	6340	6727	6636	6759	6537
H45I	na	na	na	na	na	na	na	na	na	na	165	1085	347	383	36	311	289	147	110	132	2474	1544	1024	920	1085	776	780	435	442	408	na	na	na	na	na	na	na	na	na	na	1933	1544	693	755	1158	659	670	528	372
H45K	na	na	na	na	na	na	na	na	na	na	428	4095	1277	1171	142	869	1202	956	722	1130	8	4864	3204	2772	2856	2675	3710	1913	2436	2611	na	na	na	na	na	na	na	na	na	na	4613	4680	2125	2162	2860	2505	2522	2512	1789
H45L	na	na	na	na	na	na	na	na	na	na	906	8548	2728	2682	291	2269	3174	1984	1642	2227	10843	10467	6895	6033	6098	5534	6564	3941	5189	5528	na	na	na	na	na	na	na	na	na	na	9048	9848	4255	4540	6487	4993	5210	4730	3883
H45M	na	na	na	na	na	na	na	na	na	na	267	2773	927	734	105	568	847	579	571	736	3575	3402	2041	1847	2009	1728	1950	1319	1212	2131	na	na	na	na	na	na	na	na	na	na	2287	3184	1279	1512	1904	1471	1833	1558	1240
H45N	na	na	na	na	na	na	na	na	na	na	267	4108	1109	1197	138	1184	1585	1537	1368	2115	4441	3936	2546	2407	2308	2203	3060	1972	2846	3568	na	na	na	na	na	na	na	na	na	na	2981	3791	1486	1632	2384	2238	2262	2469	2325
H45P	na	na	na	na	na	na	na	na	na	na	573	9768	2959	3363	403	3415	3876	4268	5477	6560	10	9963	5708	5206	5541	5174	6004	5230	7473	9832	na	na	na	na	na	na	na	na	na	na	5694	8563	3546	3930	5254	5042	5647	5772	5799
H45Q	na	na	na	na	na	na	na	na	na	na	304	4186	656	983	146	1241	1095	1104	1146	1466	3551	3995	2408	1828	1649	1583	2316	1810	2421	2659	na	na	na	na	na	na	na	na	na	na	2317	3552	1255	1365	1952	2006	1830	1940	1700
H45R	na	na	na	na	na	na	na	na	na	na	838	8660	2940	2626	278	3085	2366	1933	1582	2260	10	11191	6894	6470	6701	6234	7459	4206	4988	4903	na	na	na	na	na	na	na	na	na	na	9416	10845	4982	5240	6100	6158	5674	4846	3799
H45S	na	na	na	na	na	na	na	na	na	na	462	7634	2254	2734	321	2819	4596	4916	7344	8058	6284	7349	4566	4476	3947	4232	5764	4574	8155	10606	na	na	na	na	na	na	na	na	na	na	4093	7172	2802	3094	4326	4426	5127	5873	6536
H45T	na	na	na	na	na	na	na	na	na	na	306	5195	1562	1746	193	1681	2373	2655	4730	4957	4844	5187	3138	2693	2949	2966	3834	3177	5920	7714	na	na	na	na	na	na	na	na	na	na	2875	4598	2003	1952	3147	3254	3553	3818	4445
H45V	na	na	na	na	na	na	na	na	na	na	329	2642	815	839	94	496	635	334	418	456	4468	3546	2413	2500	2373	2000	2276	1171	1261	1105	na	na	na	na	na	na	na	na	na	na	3732	3478	1635	1734	2181	1841	1801	1422	978
H45W	na	na	na	na	na	na	na	na	na	na	388	4502	1249	1146	141	809	1658	938	961	1375	12	5055	2961	2683	2788	2640	2500	1842	2481	2418	na	na	na	na	na	na	na	na	na	na	3578	4628	2066	2108	2629	2106	2462	1950	1733
H45Y	na	na	na	na	na	na	na	na	na	na	194	2094	652	558	81	493	457	405	414	494	9	2346	1611	1403	1342	1146	1248	784	1024	896	na	na	na	na	na	na	na	na	na	na	1743	2133	1016	1013	1422	1504	1209	853	714
I115*	499	na	na	na	na	na	na	na	na	na	na	na	na	na	na	na	na	na	na	na	na	na	na	na	na	na	na	na	na	na	na	na	na	na	na	na	na	na	na	na	na	na	na	na	na	na	na	na	na
I115A	1559	1765	na	585	750	657	737	546	394	2441	na	na	na	na	na	na	na	na	na	na	na	na	na	na	na	na	na	na	na	na	3078	2789	713	678	681	947	833	768	634	568	na	na	na	na	na	na	na	na	na
I115C	384	636	na	94	44	63	11	na	59	333	na	na	na	na	na	na	na	na	na	na	na	na	na	na	na	na	na	na	na	na	922	963	112	108	158	86	194	123	86	62	na	na	na	na	na	na	na	na	na
I115D	131	na	na	na	na	na	na	na	na	na	na	na	na	na	na	na	na	na	na	na	na	na	na	na	na	na	na	na	na	na	50	na	na	na	na	na	na	na	na	na	na	na	na	na	na	na	na	na	na
I115E	524	180	na	44	42	na	20	11	na	203	na	na	na	na	na	na	na	na	na	na	na	na	na	na	na	na	na	na	na	na	506	39	27	21	23	28	22	41	27	21	na	na	na	na	na	na	na	na	na
I115F	na	na	na	na	na	na	na	na	na	na	na	na	na	na	na	na	na	na	na	na	na	na	na	na	na	na	na	na	na	na	18	18	na	5	16	6	6	14	6	31	na	na	na	na	na	na	na	na	na
I115G	3388	1306	na	323	303	252	230	373	58	497	na	na	na	na	na	na	na	na	na	na	na	na	na	na	na	na	na	na	na	na	3505	702	279	366	251	236	195	194	79	112	na	na	na	na	na	na	na	na	na
I115H	1124	1618	na	373	485	395	445	429	236	1675	na	na	na	na	na	na	na	na	na	na	na	na	na	na	na	na	na	na	na	na	2225	1710	431	377	418	443	483	341	303	291	na	na	na	na	na	na	na	na	na
I115K	na	na	na	na	na	na	na	na	na	na	na	na	na	na	na	na	na	na	na	na	na	na	na	na	na	na	na	na	na	na	na	na	na	na	na	na	na	na	na	na	na	na	na	na	na	na	na	na	na
I115L	1128	1898	na	532	473	493	322	158	127	595	na	na	na	na	na	na	na	na	na	na	na	na	na	na	na	na	na	na	na	na	2979	14008	522	427	479	678	563	535	246	204	na	na	na	na	na	na	na	na	na
I115M	na	na	na	na	na	na	na	na	na	na	na	na	na	na	na	na	na	na	na	na	na	na	na	na	na	na	na	na	na	na	na	17	28	na	na	10	na	na	38	10	na	na	na	na	na	na	na	na	na
I115N	na	na	na	na	na	na	na	na	na	na	na	na	na	na	na	na	na	na	na	na	na	na	na	na	na	na	na	na	na	na	8	na	na	na	na	na	na	na	na	na	na	na	na	na	na	na	na	na	na
I115P	1389	831	na	109	154	89	17	24	16	255	na	na	na	na	na	na	na	na	na	na	na	na	na	na	na	na	na	na	na	na	1688	274	45	55	49	72	62	50	32	27	na	na	na	na	na	na	na	na	na
I115Q	767	399	na	189	241	154	37	108	70	273	na	na	na	na	na	na	na	na	na	na	na	na	na	na	na	na	na	na	na	na	1393	397	207	151	182	205	139	119	76	64	na	na	na	na	na	na	na	na	na
I115R	1214	317	na	66	60	na	15	39	9	81	na	na	na	na	na	na	na	na	na	na	na	na	na	na	na	na	na	na	na	na	1187	108	31	28	na	6	17	21	6	na	na	na	na	na	na	na	na	na	na
I115S	1609	1778	na	616	603	597	501	472	403	3693	na	na	na	na	na	na	na	na	na	na	na	na	na	na	na	na	na	na	na	na	3144	2327	566	432	883	659	591	574	410	372	na	na	na	na	na	na	na	na	na
I115T	1369	2188	na	597	738	669	709	532	527	8066	na	na	na	na	na	na	na	na	na	na	na	na	na	na	na	na	na	na	na	na	3370	3887	692	653	562	820	773	840	703	771	na	na	na	na	na	na	na	na	na
I115V	2118	3143	na	1341	1609	1423	1603	1066	1250	10483	na	na	na	na	na	na	na	na	na	na	na	na	na	na	na	na	na	na	na	na	5348	5275	1623	1431	1450	1883	1924	2046	1923	1787	na	na	na	na	na	na	na	na	na
I115W	1131	1584	na	352	378	305	284	295	146	880	na	na	na	na	na	na	na	na	na	na	na	na	na	na	na	na	na	na	na	na	2358	1253	391	355	358	469	383	348	227	197	na	na	na	na	na	na	na	na	na
I115Y	na	na	na	na	na	na	6	na	na	na	na	na	na	na	na	na	na	na	na	na	na	na	na	na	na	na	na	na	na	na	na	na	na	na	na	na	na	na	na	na	na	na	na	na	na	na	na	na	na
I14*	315	na	78	10	7	na	27	42	34	312	na	na	na	na	na	na	na	na	na	na	601	87	26	37	37	25	22	18	26	27	na	na	na	na	na	na	na	na	na	na	184	80	32	29	18	83	30	34	67
I14A	1431	na	2135	799	978	912	1084	1093	872	8914	na	na	na	na	na	na	na	na	na	na	2531	2725	1247	1147	1605	1672	1965	1201	1553	2271	na	na	na	na	na	na	na	na	na	na	8	2713	835	830	1094	1093	1081	1037	1098
I14C	7	na	781	295	480	549	452	564	507	3618	na	na	na	na	na	na	na	na	na	na	969	1051	498	515	667	688	784	503	539	793	na	na	na	na	na	na	na	na	na	na	700	1063	640	319	543	506	431	460	397
I14D	56	na	16	9	na	na	na	na	na	na	na	na	na	na	na	na	na	na	na	na	290	26	18	11	24	na	na	8	na	10	na	na	na	na	na	na	na	na	na	na	58	16	32	na	na	na	11	na	9
I14E	573	na	61	9	8	na	43	13	na	na	na	na	na	na	na	na	na	na	na	na	674	87	33	24	21	23	18	6	na	na	na	na	na	na	na	na	na	na	na	na	295	78	20	22	34	16	9	10	na
I14G	3620	na	1311	130	84	144	35	91	7	75	na	na	na	na	na	na	na	na	na	na	4167	852	272	200	216	106	144	64	36	22	na	na	na	na	na	na	na	na	na	na	3115	758	325	225	218	128	160	66	63
I14H	380	na	47	6	na	na	10	21	na	na	na	na	na	na	na	na	na	na	na	na	622	77	27	28	14	18	35	16	na	16	na	na	na	na	na	na	na	na	na	na	292	64	22	15	na	10	na	9	na
I14K	545	na	104	17	16	na	13	na	42	356	na	na	na	na	na	na	na	na	na	na	977	128	32	34	38	25	22	15	58	84	na	na	na	na	na	na	na	na	na	na	295	106	18	16	31	54	42	25	26
I14L	24	na	9333	3956	5500	5663	8200	9673	11371	85914	na	na	na	na	na	na	na	na	na	na	12791	16745	6181	6564	9600	10447	14570	9651	16868	18749	na	na	na	na	na	na	na	na	na	na	25	15766	4412	4132	6951	6721	6785	8034	9238
I14M	1917	na	1830	235	233	97	113	58	388	2765	na	na	na	na	na	na	na	na	na	na	2115	2648	241	362	788	423	784	349	367	372	na	na	na	na	na	na	na	na	na	na	1232	2380	127	75	111	105	21	48	21
I14N	79	na	na	5	na	na	na	na	na	na	na	na	na	na	na	na	na	na	na	na	na	na	na	na	na	na	na	na	na	na	na	na	na	na	na	na	na	na	na	na	na	na	na	na	na	na	na	na	na
I14P	1431	na	312	40	20	54	29	na	8	164	na	na	na	na	na	na	na	na	na	na	1915	241	91	78	75	76	72	24	29	41	na	na	na	na	na	na	na	na	na	na	598	177	60	44	58	29	28	19	25
I14Q	1353	na	1043	134	133	132	64	34	7	162	na	na	na	na	na	na	na	na	na	na	1982	774	257	278	234	168	155	59	97	48	na	na	na	na	na	na	na	na	na	na	1824	816	347	291	299	230	201	152	75
I14R	1080	na	213	26	28	86	na	34	18	na	na	na	na	na	na	na	na	na	na	na	1772	213	96	97	99	64	55	20	47	93	na	na	na	na	na	na	na	na	na	na	442	158	60	47	25	17	19	40	13
I14S	1857	na	1089	151	162	81	73	99	36	360	na	na	na	na	na	na	na	na	na	na	1896	839	356	285	332	367	149	123	104	118	na	na	na	na	na	na	na	na	na	na	1774	841	369	309	271	295	252	224	155
I14T	2553	na	3531	507	612	485	396	371	368	2326	na	na	na	na	na	na	na	na	na	na	3319	2877	939	923	1039	926	990	520	447	623	na	na	na	na	na	na	na	na	na	na	2584	2672	684	625	759	733	739	629	539
I14V	23	na	3291	1407	1762	1759	2707	3267	2663	21918	na	na	na	na	na	na	na	na	na	na	4833	6348	2288	2298	3401	3609	5217	2964	4687	4892	na	na	na	na	na	na	na	na	na	na	14	5683	1608	1475	2054	2368	2311	2724	2747
I14W	309	na	44	na	8	na	6	na	na	42	na	na	na	na	na	na	na	na	na	na	488	60	20	11	26	9	31	na	15	na	na	na	na	na	na	na	na	na	na	na	114	60	7	18	16	23	29	na	na
I14Y	166	na	26	na	na	na	na	na	na	na	na	na	na	na	na	na	na	na	na	na	228	31	12	13	na	29	na	na	na	na	na	na	na	na	na	na	na	na	na	na	95	29	10	7	na	11	na	na	na
I155*	na	na	na	na	na	na	na	na	na	na	199	37	32	7	2	20	5	9	24	30	na	na	na	na	na	na	na	na	na	na	134	51	na	49	6	22	6	18	6	na	na	na	na	na	na	na	na	na	na
I155A	na	na	na	na	na	na	na	na	na	na	1946	1185	795	342	52	416	285	397	310	475	na	na	na	na	na	na	na	na	na	na	15	2079	458	409	500	603	539	419	325	342	na	na	na	na	na	na	na	na	na
I155C	na	na	na	na	na	na	na	na	na	na	767	749	282	113	24	193	141	142	278	292	na	na	na	na	na	na	na	na	na	na	684	873	182	153	624	277	271	252	228	231	na	na	na	na	na	na	na	na	na
I155D	na	na	na	na	na	na	na	na	na	na	443	129	41	8	2	9	na	25	31	12	na	na	na	na	na	na	na	na	na	na	143	101	17	15	40	22	15	na	7	13	na	na	na	na	na	na	na	na	na
I155E	na	na	na	na	na	na	na	na	na	na	2623	1926	1172	498	70	666	594	684	807	774	na	na	na	na	na	na	na	na	na	na	2308	3114	707	734	713	896	917	733	658	653	na	na	na	na	na	na	na	na	na
I155F	na	na	na	na	na	na	na	na	na	na	1569	1010	484	300	24	186	253	223	166	234	na	na	na	na	na	na	na	na	na	na	1490	1338	266	285	298	327	338	276	145	171	na	na	na	na	na	na	na	na	na
I155G	na	na	na	na	na	na	na	na	na	na	1	1575	1274	499	69	388	392	252	257	266	na	na	na	na	na	na	na	na	na	na	14	2666	861	782	634	708	539	426	225	195	na	na	na	na	na	na	na	na	na
I155H	na	na	na	na	na	na	na	na	na	na	1258	867	417	199	19	210	229	201	291	160	na	na	na	na	na	na	na	na	na	na	1035	1198	283	289	210	271	240	196	163	174	na	na	na	na	na	na	na	na	na
I155K	na	na	na	na	na	na	na	na	na	na	2835	2602	1325	633	85	513	707	718	762	871	na	na	na	na	na	na	na	na	na	na	2983	3452	678	732	728	1004	1027	897	686	738	na	na	na	na	na	na	na	na	na
I155L	na	na	na	na	na	na	na	na	na	na	1	4329	2211	1033	150	1104	2102	1352	2016	1846	na	na	na	na	na	na	na	na	na	na	5289	5977	1176	1225	1300	1803	1859	1971	1608	1575	na	na	na	na	na	na	na	na	na
I155M	na	na	na	na	na	na	na	na	na	na	9	na	7	na	8	6	9	na	7	na	na	na	na	na	na	na	na	na	na	na	na	na	na	na	na	na	na	na	na	na	na	na	na	na	na	na	na	na	na
I155N	na	na	na	na	na	na	na	na	na	na	6	1151	597	257	33	183	256	141	66	201	na	na	na	na	na	na	na	na	na	na	1518	1525	353	377	368	375	324	197	172	135	na	na	na	na	na	na	na	na	na
I155P	na	na	na	na	na	na	na	na	na	na	684	204	66	20	3	35	5	75	28	12	na	na	na	na	na	na	na	na	na	na	679	113	40	61	17	17	28	14	9	8	na	na	na	na	na	na	na	na	na
I155Q	na	na	na	na	na	na	na	na	na	na	1219	883	521	252	37	274	321	354	382	344	na	na	na	na	na	na	na	na	na	na	1021	1432	369	242	277	402	354	310	284	290	na	na	na	na	na	na	na	na	na
I155R	na	na	na	na	na	na	na	na	na	na	3677	2690	1674	637	116	817	891	867	959	1081	na	na	na	na	na	na	na	na	na	na	3622	4286	976	826	936	1136	1205	1016	868	831	na	na	na	na	na	na	na	na	na
I155S	na	na	na	na	na	na	na	na	na	na	2118	1269	811	315	55	264	414	354	218	283	na	na	na	na	na	na	na	na	na	na	1810	2141	474	385	483	618	455	349	235	256	na	na	na	na	na	na	na	na	na
I155T	na	na	na	na	na	na	na	na	na	na	4	1737	948	400	52	451	912	512	524	761	na	na	na	na	na	na	na	na	na	na	2258	2529	500	505	629	798	762	791	579	543	na	na	na	na	na	na	na	na	na
I155V	na	na	na	na	na	na	na	na	na	na	4	3758	2302	947	146	1104	1402	1195	1423	1919	na	na	na	na	na	na	na	na	na	na	4126	5865	1164	1224	1391	1774	1794	1855	1538	1555	na	na	na	na	na	na	na	na	na
I155W	na	na	na	na	na	na	na	na	na	na	1917	1050	828	349	51	322	431	280	398	325	na	na	na	na	na	na	na	na	na	na	1554	1991	567	481	621	567	414	270	222	174	na	na	na	na	na	na	na	na	na
I155Y	na	na	na	na	na	na	na	na	na	na	977	841	362	216	23	207	145	116	96	219	na	na	na	na	na	na	na	na	na	na	904	911	212	162	203	242	209	157	120	128	na	na	na	na	na	na	na	na	na
I2*	29	na	na	na	na	na	na	na	na	na	na	na	na	na	na	na	na	na	na	na	18	na	na	na	na	na	na	na	na	na	na	na	na	na	na	na	na	na	na	na	18	na	na	na	na	na	na	na	na
I2A	6	na	13	na	na	na	na	19	na	na	na	na	na	na	na	na	na	na	na	na	27	na	na	na	na	na	na	na	na	na	na	na	na	na	na	na	na	na	na	na	23	na	na	na	na	16	na	na	na
I2C	73	na	6	6	14	na	na	na	5	na	na	na	na	na	na	na	na	na	na	na	32	11	13	8	9	22	22	na	na	na	na	na	na	na	na	na	na	na	na	na	15	32	10	11	13	24	na	na	10
I2D	na	na	na	na	na	na	na	na	na	na	na	na	na	na	na	na	na	na	na	na	19	na	na	na	na	na	na	na	na	na	na	na	na	na	na	na	na	na	na	na	na	na	na	na	na	na	na	na	na
I2E	na	na	na	na	na	na	na	na	na	na	na	na	na	na	na	na	na	na	na	na	12	na	na	na	na	na	na	na	na	na	na	na	na	na	na	na	na	na	na	na	21	na	na	na	na	na	na	na	na
I2G	36	na	na	na	na	na	na	na	na	na	na	na	na	na	na	na	na	na	na	na	30	na	na	na	na	na	na	na	na	10	na	na	na	na	na	na	na	na	na	na	9	na	na	na	na	na	na	na	na
I2H	26	na	8	12	12	29	na	na	na	na	na	na	na	na	na	na	na	na	na	na	94	19	10	na	21	8	na	12	26	na	na	na	na	na	na	na	na	na	na	na	22	43	27	8	15	7	14	14	10
I2K	386	na	245	67	55	70	19	61	19	106	na	na	na	na	na	na	na	na	na	na	570	241	127	89	124	60	49	35	49	28	na	na	na	na	na	na	na	na	na	na	620	242	111	115	100	118	60	91	45
I2L	108	na	164	64	58	22	149	55	14	277	na	na	na	na	na	na	na	na	na	na	98	60	41	56	47	36	32	7	24	na	na	na	na	na	na	na	na	na	na	na	55	58	39	36	43	10	30	16	na
I2M	550	na	1035	88	133	302	257	297	134	1254	na	na	na	na	na	na	na	na	na	na	1242	906	na	36	175	111	52	165	na	10	na	na	na	na	na	na	na	na	na	na	1005	1244	na	98	168	na	99	12	12
I2P	62	na	35	6	na	na	na	na	na	na	na	na	na	na	na	na	na	na	na	na	92	na	na	na	na	na	na	na	na	na	na	na	na	na	na	na	na	na	na	na	63	14	20	na	na	na	19	na	na
I2Q	na	na	na	na	na	na	na	na	na	na	na	na	na	na	na	na	na	na	na	na	37	na	na	11	na	na	na	na	na	na	na	na	na	na	na	na	na	na	na	na	35	na	na	na	na	na	na	na	9
I2R	312	na	62	23	14	na	na	46	17	na	na	na	na	na	na	na	na	na	na	na	929	92	56	14	58	25	14	13	12	64	na	na	na	na	na	na	na	na	na	na	497	83	93	32	25	10	12	16	10
I2S	na	na	10	na	na	na	na	na	na	na	na	na	na	na	na	na	na	na	na	na	31	na	na	na	na	na	na	na	na	na	na	na	na	na	na	na	na	na	na	na	na	na	na	na	na	na	na	na	na
I2T	512	na	355	135	105	199	7	24	32	123	na	na	na	na	na	na	na	na	na	na	799	297	164	143	210	123	101	54	35	39	na	na	na	na	na	na	na	na	na	na	816	443	356	140	266	198	163	146	81
I2V	62	na	76	21	17	na	6	na	6	56	na	na	na	na	na	na	na	na	na	na	166	86	64	47	44	33	na	7	15	na	na	na	na	na	na	na	na	na	na	na	142	101	18	54	37	33	27	16	11
I2W	61	na	28	na	na	na	na	na	na	na	na	na	na	na	na	na	na	na	na	na	34	19	12	8	12	na	na	na	na	na	na	na	na	na	na	na	na	na	na	na	37	15	na	6	na	18	na	na	8
I2Y	61	na	123	19	17	na	14	na	38	48	na	na	na	na	na	na	na	na	na	na	47	18	13	26	9	20	na	11	na	na	na	na	na	na	na	na	na	na	na	na	35	46	na	17	27	29	12	23	12
I41*	na	na	na	na	na	na	na	na	na	na	98	118	28	19	6	na	na	22	12	24	856	190	130	74	70	66	24	53	74	71	na	na	na	na	na	na	na	na	na	na	386	90	69	40	44	14	41	40	19
I41A	na	na	na	na	na	na	na	na	na	na	428	3863	1341	1157	157	758	645	784	962	1058	5876	6010	4038	3484	3795	3152	4056	2044	2367	2836	na	na	na	na	na	na	na	na	na	na	5098	5896	2464	2727	3264	3184	2620	2455	1968
I41C	na	na	na	na	na	na	na	na	na	na	157	2212	789	587	88	689	789	904	1444	1376	2610	2310	1445	1402	1327	1365	1852	1324	2571	2621	na	na	na	na	na	na	na	na	na	na	1492	2049	1216	951	1262	1296	1480	1434	1436
I41D	na	na	na	na	na	na	na	na	na	na	31	68	33	19	na	na	6	na	na	8	248	72	49	27	28	37	na	25	27	22	na	na	na	na	na	na	na	na	na	na	160	56	29	12	11	67	30	25	na
I41E	na	na	na	na	na	na	na	na	na	na	82	102	34	25	7	30	na	36	20	66	904	188	109	99	89	85	90	77	87	62	na	na	na	na	na	na	na	na	na	na	599	112	68	52	78	48	51	52	23
I41F	na	na	na	na	na	na	na	na	na	na	114	438	166	105	9	99	9	58	131	99	1226	675	669	533	495	377	473	188	134	120	na	na	na	na	na	na	na	na	na	na	1057	642	476	354	417	411	348	292	157
I41G	na	na	na	na	na	na	na	na	na	na	132	214	65	58	5	20	na	9	na	43	2443	318	271	240	169	136	166	92	79	201	na	na	na	na	na	na	na	na	na	na	1088	268	250	191	242	170	110	147	79
I41H	na	na	na	na	na	na	na	na	na	na	38	53	36	17	na	22	na	10	45	11	348	69	47	63	38	43	27	19	na	na	na	na	na	na	na	na	na	na	na	na	182	56	13	17	25	45	18	19	12
I41K	na	na	na	na	na	na	na	na	na	na	91	125	44	20	3	na	na	25	na	26	999	186	155	86	73	95	42	59	62	55	na	na	na	na	na	na	na	na	na	na	700	118	74	61	61	44	60	50	15
I41L	na	na	na	na	na	na	na	na	na	na	935	10440	3608	3311	376	3210	3894	3322	3911	4491	13457	11815	7794	7312	7632	7558	9413	6053	8264	8776	na	na	na	na	na	na	na	na	na	na	9314	10849	5032	5279	7669	6657	7112	6655	5681
I41M	na	na	na	na	na	na	na	na	na	na	360	2732	862	979	100	647	1005	572	323	665	4155	3189	2227	2120	2126	1836	1549	1264	1351	1402	na	na	na	na	na	na	na	na	na	na	3074	2922	1344	1493	1665	1682	1794	1417	1046
I41N	na	na	na	na	na	na	na	na	na	na	56	88	20	11	6	5	15	18	12	7	628	166	95	113	44	101	38	49	40	75	na	na	na	na	na	na	na	na	na	na	527	99	65	54	36	48	28	42	14
I41P	na	na	na	na	na	na	na	na	na	na	113	179	60	54	4	27	66	6	30	28	1155	253	167	131	134	71	120	61	25	105	na	na	na	na	na	na	na	na	na	na	704	177	80	89	83	30	36	64	18
I41Q	na	na	na	na	na	na	na	na	na	na	41	64	25	12	na	15	na	20	11	28	619	86	66	53	56	33	11	35	30	39	na	na	na	na	na	na	na	na	na	na	378	77	54	35	27	37	31	18	22
I41R	na	na	na	na	na	na	na	na	na	na	105	169	42	53	6	23	25	29	28	13	1217	293	214	161	174	87	174	87	53	54	na	na	na	na	na	na	na	na	na	na	1030	210	127	69	71	90	63	77	47
I41S	na	na	na	na	na	na	na	na	na	na	160	288	87	49	9	34	78	22	55	71	2243	467	379	295	226	153	150	82	32	137	na	na	na	na	na	na	na	na	na	na	1985	350	306	301	194	167	129	127	71
I41T	na	na	na	na	na	na	na	na	na	na	267	1702	656	613	52	342	483	230	258	259	3677	2508	2003	1688	1722	1364	1183	740	648	732	na	na	na	na	na	na	na	na	na	na	2827	2461	1288	1249	1656	1136	1228	1033	664
I41V	na	na	na	na	na	na	na	na	na	na	999	16787	5392	5568	679	6696	8266	8656	11423	13339	14650	18223	10565	9811	9900	10432	13829	10470	17522	22485	na	na	na	na	na	na	na	na	na	na	10475	15038	6670	6873	10427	10514	11320	12420	13200
I41W	na	na	na	na	na	na	na	na	na	na	106	236	60	59	2	49	51	350	446	407	10	321	273	154	171	80	59	64	119	77	na	na	na	na	na	na	na	na	na	na	1103	264	170	121	187	54	70	109	45
I41Y	na	na	na	na	na	na	na	na	na	na	30	50	14	10	na	18	11	19	na	13	458	107	97	62	31	16	77	11	19	24	na	na	na	na	na	na	na	na	na	na	436	81	20	32	41	25	20	32	12
I5*	85	na	88	6	10	na	28	na	na	na	na	na	na	na	na	na	na	na	na	na	561	73	30	23	28	14	13	10	14	na	na	na	na	na	na	na	na	na	na	na	205	50	13	12	10	9	8	17	8
I50*	na	na	na	na	na	na	na	na	na	na	47	81	27	42	4	12	21	7	na	10	547	108	66	60	75	39	na	30	na	30	na	na	na	na	na	na	na	na	na	na	284	85	29	20	40	55	18	28	16
I50A	na	na	na	na	na	na	na	na	na	na	178	1375	487	401	45	321	206	257	148	309	1983	1897	1359	856	1158	897	1161	670	495	686	na	na	na	na	na	na	na	na	na	na	1543	1850	888	757	814	850	776	756	501
I50C	na	na	na	na	na	na	na	na	na	na	58	604	195	156	24	195	240	208	202	281	607	699	388	358	388	377	564	322	449	582	na	na	na	na	na	na	na	na	na	na	475	687	325	301	434	360	373	425	382
I50D	na	na	na	na	na	na	na	na	na	na	9	18	na	na	1	4	na	na	na	7	109	22	30	8	11	8	15	8	16	73	na	na	na	na	na	na	na	na	na	na	95	16	na	na	9	39	na	10	18
I50E	na	na	na	na	na	na	na	na	na	na	61	117	36	11	4	38	46	14	na	17	846	184	141	82	95	56	85	45	13	17	na	na	na	na	na	na	na	na	na	na	531	172	90	55	66	57	33	37	35
I50F	na	na	na	na	na	na	na	na	na	na	3	18	na	5	5	13	na	na	18	7	29	36	na	na	na	na	16	7	16	10	na	na	na	na	na	na	na	na	na	na	12	11	na	7	na	na	11	7	15
I50G	na	na	na	na	na	na	na	na	na	na	531	921	229	206	15	173	138	70	84	58	12	1584	1411	821	689	395	392	368	183	190	na	na	na	na	na	na	na	na	na	na	4896	1393	777	650	614	624	462	361	175
I50H	na	na	na	na	na	na	na	na	na	na	16	37	9	10	2	6	25	na	15	na	74	74	71	28	36	21	11	28	na	na	na	na	na	na	na	na	na	na	na	na	138	81	47	35	36	na	38	22	12
I50K	na	na	na	na	na	na	na	na	na	na	81	143	45	16	5	41	45	46	14	16	687	185	130	139	94	59	23	49	35	17	na	na	na	na	na	na	na	na	na	na	539	166	83	242	58	38	68	46	17
I50L	na	na	na	na	na	na	na	na	na	na	664	11443	3166	3202	431	4033	5533	7413	8522	9717	8142	10633	6143	5262	5789	5933	8142	6332	11251	13335	na	na	na	na	na	na	na	na	na	na	6436	9211	4154	3519	6005	6986	6548	7576	7915
I50M	na	na	na	na	na	na	na	na	na	na	24	703	10	18	6	19	9	11	47	39	236	743	na	na	21	na	11	7	18	33	na	na	na	na	na	na	na	na	na	na	380	477	25	10	7	14	29	15	18
I50N	na	na	na	na	na	na	na	na	na	na	6	na	na	5	3	na	na	na	na	na	na	na	na	na	na	na	na	na	na	na	na	na	na	na	na	na	na	na	na	na	na	na	na	na	na	na	na	na	na
I50P	na	na	na	na	na	na	na	na	na	na	12	23	8	4	na	na	na	na	na	na	281	32	15	66	20	11	na	10	na	na	na	na	na	na	na	na	na	na	na	na	133	29	6	15	17	na	na	na	13
I50Q	na	na	na	na	na	na	na	na	na	na	88	416	188	122	4	93	35	63	37	67	941	839	571	502	417	298	214	203	93	179	na	na	na	na	na	na	na	na	na	na	957	736	388	288	337	300	318	255	173
I50R	na	na	na	na	na	na	na	na	na	na	338	1099	368	251	15	193	179	59	46	94	4614	1856	1654	1156	962	652	700	427	256	257	na	na	na	na	na	na	na	na	na	na	3826	1924	1072	884	950	1011	765	525	276
I50S	na	na	na	na	na	na	na	na	na	na	107	323	75	116	8	86	25	12	37	44	1180	601	504	447	386	311	131	161	110	120	na	na	na	na	na	na	na	na	na	na	769	621	588	220	293	206	241	170	120
I50T	na	na	na	na	na	na	na	na	na	na	98	812	284	240	25	167	124	195	172	232	759	1147	693	600	714	556	519	466	513	469	na	na	na	na	na	na	na	na	na	na	921	1120	439	422	523	573	516	470	356
I50V	na	na	na	na	na	na	na	na	na	na	491	5715	1628	1647	208	1428	1985	1808	1994	2467	6469	5819	3334	2651	3122	3274	3941	2994	4235	4416	na	na	na	na	na	na	na	na	na	na	4663	5676	2292	2134	3321	2878	3077	3431	3094
I50W	na	na	na	na	na	na	na	na	na	na	128	179	42	18	5	9	na	11	45	18	2617	300	205	175	160	84	180	97	57	84	na	na	na	na	na	na	na	na	na	na	1126	257	146	84	156	65	54	79	23
I50Y	na	na	na	na	na	na	na	na	na	na	21	35	na	18	na	9	na	na	na	na	153	54	67	43	41	21	68	na	na	na	na	na	na	na	na	na	na	na	na	na	170	83	26	37	27	28	18	19	7
I5A	1912	na	607	62	76	101	7	20	8	104	na	na	na	na	na	na	na	na	na	na	2136	327	197	142	117	100	49	37	39	21	na	na	na	na	na	na	na	na	na	na	1471	424	247	160	94	99	46	21	25
I5C	361	na	427	166	201	69	96	43	81	455	na	na	na	na	na	na	na	na	na	na	726	441	264	205	249	221	268	125	108	62	na	na	na	na	na	na	na	na	na	na	421	562	284	193	219	148	203	138	108
I5D	193	na	13	na	13	na	17	na	na	na	na	na	na	na	na	na	na	na	na	na	460	43	18	15	27	16	na	na	na	na	na	na	na	na	na	na	na	na	na	na	142	50	10	11	11	na	23	na	7
I5E	750	na	118	21	20	na	12	65	6	77	na	na	na	na	na	na	na	na	na	na	938	123	48	38	34	39	21	8	12	14	na	na	na	na	na	na	na	na	na	na	283	82	37	18	24	68	17	7	18
I5F	1381	na	1033	445	499	356	388	351	365	2926	na	na	na	na	na	na	na	na	na	na	1832	1787	747	676	890	739	970	442	585	510	na	na	na	na	na	na	na	na	na	na	1404	1729	600	548	633	514	570	469	413
I5G	1625	na	330	33	43	na	13	25	24	164	na	na	na	na	na	na	na	na	na	na	2869	332	152	134	115	56	131	36	70	57	na	na	na	na	na	na	na	na	na	na	923	220	61	78	53	39	51	42	25
I5H	2877	na	2785	542	538	345	124	235	166	1116	na	na	na	na	na	na	na	na	na	na	3708	1905	1133	1110	1074	836	746	383	315	235	na	na	na	na	na	na	na	na	na	na	3265	2420	811	903	1043	751	715	619	428
I5K	1011	na	244	35	26	165	31	na	9	123	na	na	na	na	na	na	na	na	na	na	2093	190	70	82	57	47	72	26	48	27	na	na	na	na	na	na	na	na	na	na	735	164	65	50	52	37	27	29	9
I5L	7	na	4226	1432	1485	1301	1114	901	1352	5703	na	na	na	na	na	na	na	na	na	na	6511	5065	2191	2163	2695	2291	2407	1313	1496	1300	na	na	na	na	na	na	na	na	na	na	5387	5225	2124	1688	2255	1704	2233	1543	1265
I5M	805	na	867	84	na	38	na	na	na	na	na	na	na	na	na	na	na	na	na	na	1569	1096	340	238	249	79	na	na	na	na	na	na	na	na	na	na	na	na	na	na	1720	1198	431	339	196	na	99	7	na
I5N	1605	na	586	90	74	77	11	na	36	59	na	na	na	na	na	na	na	na	na	na	2971	366	152	122	134	69	43	49	24	23	na	na	na	na	na	na	na	na	na	na	1786	285	127	139	71	87	124	37	30
I5P	1604	na	310	20	47	65	38	20	10	69	na	na	na	na	na	na	na	na	na	na	2061	253	106	72	132	67	107	40	27	80	na	na	na	na	na	na	na	na	na	na	705	160	64	80	56	26	32	27	23
I5Q	597	na	146	27	20	16	41	na	7	na	na	na	na	na	na	na	na	na	na	na	1112	160	69	68	48	37	21	12	14	na	na	na	na	na	na	na	na	na	na	na	771	161	53	44	19	65	45	15	26
I5R	828	na	329	7	14	30	6	na	na	43	na	na	na	na	na	na	na	na	na	na	1572	184	50	120	64	29	33	36	20	12	na	na	na	na	na	na	na	na	na	na	427	131	104	51	40	60	32	30	13
I5S	1356	na	577	90	65	101	54	na	20	126	na	na	na	na	na	na	na	na	na	na	2612	452	158	146	161	73	134	33	36	16	na	na	na	na	na	na	na	na	na	na	1889	410	236	158	158	92	98	56	34
I5T	3070	na	777	99	70	149	44	9	7	235	na	na	na	na	na	na	na	na	na	na	3061	876	284	301	202	83	27	43	29	26	na	na	na	na	na	na	na	na	na	na	2240	738	498	271	158	113	185	74	45
I5V	3588	na	2336	367	413	238	199	55	51	529	na	na	na	na	na	na	na	na	na	na	4471	2106	1061	977	838	602	700	190	256	153	na	na	na	na	na	na	na	na	na	na	3428	2573	1008	789	783	550	693	442	251
I5W	165	na	17	17	11	na	na	na	na	na	na	na	na	na	na	na	na	na	na	na	492	87	17	14	21	20	37	na	15	na	na	na	na	na	na	na	na	na	na	na	255	24	17	13	11	na	na	na	na
I5Y	947	na	819	174	139	29	98	41	57	138	na	na	na	na	na	na	na	na	na	na	1212	511	259	274	332	151	112	87	43	85	na	na	na	na	na	na	na	na	na	na	1327	677	296	262	252	220	267	143	97
I60*	na	na	na	na	na	na	na	na	na	na	43	64	21	10	3	24	na	11	na	8	625	51	39	32	33	21	na	22	na	27	na	na	na	na	na	na	na	na	na	na	224	69	39	28	14	11	15	19	na
I60A	na	na	na	na	na	na	na	na	na	na	502	3299	1197	826	86	482	735	323	271	437	12	4114	2533	2079	2174	1524	1338	1011	918	902	na	na	na	na	na	na	na	na	na	na	3768	4124	1213	1500	1899	1634	1392	1273	798
I60C	na	na	na	na	na	na	na	na	na	na	173	2015	673	593	88	501	707	726	615	893	1848	2088	1047	986	1035	1063	1163	919	1227	1095	na	na	na	na	na	na	na	na	na	na	1473	2029	690	721	940	1139	1047	867	902
I60D	na	na	na	na	na	na	na	na	na	na	25	55	na	13	2	na	25	na	29	15	241	61	45	17	12	8	10	11	18	na	na	na	na	na	na	na	na	na	na	na	124	47	22	17	11	na	11	9	na
I60E	na	na	na	na	na	na	na	na	na	na	72	137	56	28	5	21	56	12	25	41	818	178	147	103	103	31	20	35	38	30	na	na	na	na	na	na	na	na	na	na	572	135	61	49	52	39	28	29	26
I60F	na	na	na	na	na	na	na	na	na	na	158	2718	803	828	96	799	1089	1163	1394	1578	2502	2517	1514	1389	1253	1418	1976	1319	1603	2366	na	na	na	na	na	na	na	na	na	na	1520	2219	1061	878	1289	1364	1159	1302	1292
I60G	na	na	na	na	na	na	na	na	na	na	390	686	162	100	7	109	95	74	143	103	4763	1112	661	512	456	455	392	216	179	186	na	na	na	na	na	na	na	na	na	na	3435	1002	570	406	283	344	252	232	126
I60H	na	na	na	na	na	na	na	na	na	na	144	1110	399	351	42	261	34	96	61	212	1941	1339	875	721	861	714	500	484	403	441	na	na	na	na	na	na	na	na	na	na	1350	1435	555	504	722	766	659	582	401
I60K	na	na	na	na	na	na	na	na	na	na	91	232	70	53	2	49	36	43	na	21	1523	395	243	176	152	88	104	60	15	57	na	na	na	na	na	na	na	na	na	na	957	280	151	129	222	120	106	65	29
I60L	na	na	na	na	na	na	na	na	na	na	668	9504	2794	2837	360	2888	3297	3675	3903	4594	8560	9480	5111	4504	4568	4379	5796	4437	6714	7317	na	na	na	na	na	na	na	na	na	na	5869	8362	3121	3118	4890	4530	4551	4668	4338
I60M	na	na	na	na	na	na	na	na	na	na	144	2022	473	565	77	671	634	421	541	842	1581	1942	866	731	907	736	710	752	722	1065	na	na	na	na	na	na	na	na	na	na	1305	1768	523	586	963	808	810	776	624
I60N	na	na	na	na	na	na	na	na	na	na	151	580	243	171	27	101	180	32	13	58	1684	893	653	502	489	328	273	196	255	115	na	na	na	na	na	na	na	na	na	na	1144	854	485	315	448	431	390	255	170
I60P	na	na	na	na	na	na	na	na	na	na	79	167	38	36	2	12	17	13	24	24	919	195	86	70	95	46	25	44	52	80	na	na	na	na	na	na	na	na	na	na	394	120	87	43	33	24	31	41	57
I60Q	na	na	na	na	na	na	na	na	na	na	139	323	113	56	6	53	32	46	43	31	1335	539	381	260	232	142	223	97	56	53	na	na	na	na	na	na	na	na	na	na	1026	468	233	198	203	207	140	136	61
I60R	na	na	na	na	na	na	na	na	na	na	202	406	99	88	7	20	5	20	31	17	2473	680	554	467	278	154	89	107	153	82	na	na	na	na	na	na	na	na	na	na	1957	551	254	267	203	168	125	139	60
I60S	na	na	na	na	na	na	na	na	na	na	278	945	263	189	26	174	79	141	64	110	3495	1471	1139	867	719	519	382	323	249	157	na	na	na	na	na	na	na	na	na	na	2594	1466	703	644	679	635	442	411	174
I60T	na	na	na	na	na	na	na	na	na	na	247	1847	641	618	72	399	479	233	403	362	14	2481	1440	1199	1200	1097	1350	784	826	841	na	na	na	na	na	na	na	na	na	na	2457	2312	911	801	1292	1015	1012	945	626
I60V	na	na	na	na	na	na	na	na	na	na	625	9415	2611	2736	366	2870	3829	3524	4361	4981	7339	8652	4900	3944	4383	4509	6546	4362	5919	7333	na	na	na	na	na	na	na	na	na	na	5719	8344	3129	2987	4629	4419	4636	4667	4745
I60W	na	na	na	na	na	na	na	na	na	na	158	556	189	113	8	19	111	54	61	106	1855	915	646	400	431	258	326	184	63	144	na	na	na	na	na	na	na	na	na	na	1611	834	379	308	372	330	303	234	130
I60Y	na	na	na	na	na	na	na	na	na	na	133	2046	729	599	74	822	1075	1145	928	1253	1715	1875	1053	811	931	892	1379	1009	1584	1560	na	na	na	na	na	na	na	na	na	na	1317	1678	723	562	924	843	929	998	996
I61*	na	na	na	na	na	na	na	na	na	na	15	18	na	na	na	na	na	na	na	na	85	22	12	17	na	8	na	na	45	na	na	na	na	na	na	na	na	na	na	na	100	9	6	na	na	9	na	7	na
I61A	na	na	na	na	na	na	na	na	na	na	109	677	239	198	25	120	51	99	114	100	1019	913	574	466	491	392	427	310	194	186	na	na	na	na	na	na	na	na	na	na	948	870	394	338	458	448	422	295	269
I61C	na	na	na	na	na	na	na	na	na	na	73	1034	317	325	41	412	608	386	433	581	1128	1084	622	433	538	472	739	488	752	716	na	na	na	na	na	na	na	na	na	na	769	941	403	407	625	684	593	522	479
I61D	na	na	na	na	na	na	na	na	na	na	11	20	6	na	1	na	na	na	na	na	234	32	17	22	na	9	10	12	19	na	na	na	na	na	na	na	na	na	na	na	126	22	19	8	na	na	18	11	na
I61E	na	na	na	na	na	na	na	na	na	na	27	35	8	5	4	na	na	na	na	na	310	56	37	16	14	12	39	20	na	16	na	na	na	na	na	na	na	na	na	na	166	32	21	13	11	18	17	15	na
I61F	na	na	na	na	na	na	na	na	na	na	5	na	na	12	1	na	na	na	na	na	8	na	na	na	na	na	na	na	na	na	na	na	na	na	na	na	na	na	na	na	na	na	na	na	na	na	na	na	na
I61G	na	na	na	na	na	na	na	na	na	na	539	2273	910	657	84	454	209	207	226	255	5319	3398	2465	1935	2100	1410	1304	754	644	570	na	na	na	na	na	na	na	na	na	na	4457	3231	1588	1514	1598	1917	1365	1157	679
I61H	na	na	na	na	na	na	na	na	na	na	38	51	9	22	3	na	25	6	na	na	327	87	49	25	14	12	na	20	35	26	na	na	na	na	na	na	na	na	na	na	309	51	23	6	20	na	17	15	na
I61K	na	na	na	na	na	na	na	na	na	na	45	59	10	6	1	11	73	16	26	10	762	104	52	53	25	29	20	29	9	na	na	na	na	na	na	na	na	na	na	na	395	92	56	19	32	21	na	31	na
I61L	na	na	na	na	na	na	na	na	na	na	228	2890	1007	937	129	860	709	1020	1234	1379	2198	2787	1528	1399	1285	1244	1747	1131	1558	1890	na	na	na	na	na	na	na	na	na	na	1775	2478	1019	955	1367	2318	1492	1265	1197
I61M	na	na	na	na	na	na	na	na	na	na	10	na	9	na	5	na	na	na	8	na	117	na	na	na	na	na	na	6	na	na	na	na	na	na	na	na	na	na	na	na	na	na	na	na	na	na	na	na	na
I61N	na	na	na	na	na	na	na	na	na	na	12	na	na	na	7	4	na	na	na	na	na	na	na	na	na	na	na	na	na	na	na	na	na	na	na	na	na	na	na	na	na	na	na	na	na	na	na	na	na
I61P	na	na	na	na	na	na	na	na	na	na	100	130	24	35	5	48	55	5	34	22	1120	172	117	81	64	72	40	33	33	98	na	na	na	na	na	na	na	na	na	na	618	151	57	42	45	27	43	32	15
I61Q	na	na	na	na	na	na	na	na	na	na	29	54	15	19	na	10	na	na	na	na	508	51	43	26	34	19	14	12	na	10	na	na	na	na	na	na	na	na	na	na	278	56	17	28	24	na	14	26	8
I61R	na	na	na	na	na	na	na	na	na	na	133	255	68	60	1	42	19	80	58	104	2270	347	242	342	182	100	106	96	17	51	na	na	na	na	na	na	na	na	na	na	1344	320	200	160	103	74	67	63	27
I61S	na	na	na	na	na	na	na	na	na	na	101	270	115	68	13	82	14	13	82	76	689	443	392	238	259	157	97	83	48	58	na	na	na	na	na	na	na	na	na	na	736	427	204	149	285	129	214	143	91
I61T	na	na	na	na	na	na	na	na	na	na	76	232	111	79	6	4	34	38	10	43	824	341	210	208	199	176	127	82	91	40	na	na	na	na	na	na	na	na	na	na	338	324	155	144	134	208	142	88	87
I61V	na	na	na	na	na	na	na	na	na	na	168	1880	659	605	69	615	738	632	838	695	2664	2221	1160	1053	1152	926	1609	920	1221	1588	na	na	na	na	na	na	na	na	na	na	1745	1928	773	761	1082	901	987	921	791
I61W	na	na	na	na	na	na	na	na	na	na	31	38	12	4	2	4	na	na	14	na	311	58	53	49	56	27	44	23	30	na	na	na	na	na	na	na	na	na	na	na	259	54	33	26	17	27	14	14	8
I61Y	na	na	na	na	na	na	na	na	na	na	40	77	33	15	2	17	17	na	na	na	464	168	184	89	84	42	65	28	na	34	na	na	na	na	na	na	na	na	na	na	320	130	112	50	96	51	40	50	25
I82*	699	196	na	50	47	35	na	13	16	56	na	na	na	na	na	na	na	na	na	na	na	na	na	na	na	na	na	na	na	na	468	36	17	5	8	8	14	9	12	12	na	na	na	na	na	na	na	na	na
I82A	1694	2498	na	1062	1312	1006	876	1047	762	5356	na	na	na	na	na	na	na	na	na	na	na	na	na	na	na	na	na	na	na	na	3343	2579	952	761	1098	924	1002	1039	848	811	na	na	na	na	na	na	na	na	na
I82C	147	187	na	46	42	135	76	397	13	218	na	na	na	na	na	na	na	na	na	na	na	na	na	na	na	na	na	na	na	na	199	89	na	5	na	na	na	na	na	19	na	na	na	na	na	na	na	na	na
I82D	530	378	na	126	108	37	51	46	14	253	na	na	na	na	na	na	na	na	na	na	na	na	na	na	na	na	na	na	na	na	696	499	125	91	133	114	92	88	42	23	na	na	na	na	na	na	na	na	na
I82E	5266	7339	na	3353	4267	3477	3613	3289	2658	17935	na	na	na	na	na	na	na	na	na	na	na	na	na	na	na	na	na	na	na	na	11551	8507	3596	2977	3085	3752	4000	3945	3443	3318	na	na	na	na	na	na	na	na	na
I82F	na	na	na	na	na	na	na	na	5	na	na	na	na	na	na	na	na	na	na	na	na	na	na	na	na	na	na	na	na	na	na	na	na	na	na	na	na	na	na	na	na	na	na	na	na	na	na	na	na
I82G	14136	18060	na	5494	5777	3593	3409	2920	1764	9161	na	na	na	na	na	na	na	na	na	na	na	na	na	na	na	na	na	na	na	na	26029	9	5121	4399	5187	5482	4687	4124	2409	2064	na	na	na	na	na	na	na	na	na
I82H	123	393	na	264	188	100	86	44	61	807	na	na	na	na	na	na	na	na	na	na	na	na	na	na	na	na	na	na	na	na	373	243	69	58	131	94	62	65	48	57	na	na	na	na	na	na	na	na	na
I82K	2391	3438	na	1431	1801	994	1369	1207	838	8670	na	na	na	na	na	na	na	na	na	na	na	na	na	na	na	na	na	na	na	na	5467	4576	1375	1163	1214	1306	1320	1318	1002	923	na	na	na	na	na	na	na	na	na
I82L	3336	4501	na	2097	2607	2285	2748	2609	2038	15831	na	na	na	na	na	na	na	na	na	na	na	na	na	na	na	na	na	na	na	na	4723	3218	1000	895	804	1026	1081	1264	1158	1126	na	na	na	na	na	na	na	na	na
I82M	11	6	na	na	na	na	7	na	na	na	na	na	na	na	na	na	na	na	na	na	na	na	na	na	na	na	na	na	na	na	9	na	6	na	na	na	na	na	8	na	na	na	na	na	na	na	na	na	na
I82N	na	na	na	na	na	na	na	12	na	na	na	na	na	na	na	na	na	na	na	na	na	na	na	na	na	na	na	na	na	na	na	na	na	na	na	na	na	na	na	na	na	na	na	na	na	na	na	na	na
I82P	458	364	na	115	81	na	102	37	10	132	na	na	na	na	na	na	na	na	na	na	na	na	na	na	na	na	na	na	na	na	525	238	51	50	26	43	42	23	7	10	na	na	na	na	na	na	na	na	na
I82Q	1709	2325	na	979	1153	767	1807	784	577	6014	na	na	na	na	na	na	na	na	na	na	na	na	na	na	na	na	na	na	na	na	2861	3851	854	697	807	860	930	950	832	758	na	na	na	na	na	na	na	na	na
I82R	5146	7468	na	2731	3105	2292	2572	1919	1464	10284	na	na	na	na	na	na	na	na	na	na	na	na	na	na	na	na	na	na	na	na	8983	7948	1825	1632	1924	1780	1777	1901	1489	1468	na	na	na	na	na	na	na	na	na
I82S	708	1125	76	370	491	345	400	179	217	1696	na	na	na	na	na	na	na	na	na	na	na	na	na	na	na	na	na	na	na	na	970	622	305	188	255	246	266	232	169	155	na	na	na	na	na	na	na	na	na
I82T	1135	1488	na	695	773	387	914	623	512	4611	na	na	na	na	na	na	na	na	na	na	na	na	na	na	na	na	na	na	na	na	1640	1522	321	289	240	281	357	368	322	385	na	na	na	na	na	na	na	na	na
I82V	3208	4423	na	2412	2827	2448	2979	3233	2342	18120	na	na	na	na	na	na	na	na	na	na	na	na	na	na	na	na	na	na	na	na	6575	5283	1753	1534	1490	2036	2112	2385	2174	2233	na	na	na	na	na	na	na	na	na
I82W	1843	2480	na	956	1173	1016	858	775	1030	5698	na	na	na	na	na	na	na	na	na	na	na	na	na	na	na	na	na	na	na	na	3483	2502	806	879	908	1054	1074	992	915	899	na	na	na	na	na	na	na	na	na
I82Y	316	634	na	258	316	240	185	217	262	1362	na	na	na	na	na	na	na	na	na	na	na	na	na	na	na	na	na	na	na	na	591	616	235	158	181	171	166	161	168	149	na	na	na	na	na	na	na	na	na
I91*	153	45	na	23	17	5	22	na	na	37	na	na	na	na	na	na	na	na	na	na	na	na	na	na	na	na	na	na	na	na	163	6	na	na	na	na	na	7	na	na	na	na	na	na	na	na	na	na	na
I91A	1368	2024	na	988	1267	1285	1670	2216	1972	22755	na	na	na	na	na	na	na	na	na	na	na	na	na	na	na	na	na	na	na	na	3104	3373	926	765	1027	1231	1332	1586	1751	1970	na	na	na	na	na	na	na	na	na
I91C	92	207	na	75	136	102	140	186	115	1114	na	na	na	na	na	na	na	na	na	na	na	na	na	na	na	na	na	na	na	na	389	432	83	97	100	91	124	125	138	173	na	na	na	na	na	na	na	na	na
I91D	386	214	na	39	71	46	na	na	13	128	na	na	na	na	na	na	na	na	na	na	na	na	na	na	na	na	na	na	na	na	464	166	27	20	14	16	6	na	na	na	na	na	na	na	na	na	na	na	na
I91E	1166	1100	na	455	400	251	196	150	67	517	na	na	na	na	na	na	na	na	na	na	na	na	na	na	na	na	na	na	na	na	2252	1001	310	290	291	356	302	195	114	125	na	na	na	na	na	na	na	na	na
I91F	na	na	na	na	na	na	na	9	na	na	na	na	na	na	na	na	na	na	na	na	na	na	na	na	na	na	na	na	na	na	na	na	na	na	na	na	na	na	na	na	na	na	na	na	na	na	na	na	na
I91G	6341	8104	na	3807	4840	4852	5765	5881	6383	48637	na	na	na	na	na	na	na	na	na	na	na	na	na	na	na	na	na	na	na	na	13143	11548	3583	3716	3713	4554	4970	7264	5299	5754	na	na	na	na	na	na	na	na	na
I91H	262	414	na	192	187	134	78	40	80	460	na	na	na	na	na	na	na	na	na	na	na	na	na	na	na	na	na	na	na	na	715	330	133	82	92	135	138	99	53	41	na	na	na	na	na	na	na	na	na
I91K	4449	6241	na	2368	2980	2859	2882	2410	2495	15116	na	na	na	na	na	na	na	na	na	na	na	na	na	na	na	na	na	na	na	na	9000	7193	1976	1886	1736	2439	2335	2370	2237	2238	na	na	na	na	na	na	na	na	na
I91L	757	913	na	272	479	571	646	657	533	7571	na	na	na	na	na	na	na	na	na	na	na	na	na	na	na	na	na	na	na	na	1175	841	240	237	168	253	254	276	340	382	na	na	na	na	na	na	na	na	na
I91M	na	na	9	na	na	5	6	na	6	na	na	na	na	na	na	na	na	na	na	na	na	na	na	na	na	na	na	na	na	na	na	na	na	na	na	na	na	na	na	na	na	na	na	na	na	na	na	na	na
I91N	5	na	na	na	na	na	na	na	na	na	na	na	na	na	na	na	na	na	na	na	na	na	na	na	na	na	na	na	na	na	na	na	na	na	na	na	na	na	na	na	na	na	na	na	na	na	na	na	na
I91P	520	449	na	158	149	79	122	83	32	326	na	na	na	na	na	na	na	na	na	na	na	na	na	na	na	na	na	na	na	na	810	318	106	269	103	148	125	93	90	53	na	na	na	na	na	na	na	na	na
I91Q	111	137	na	88	88	45	30	48	16	240	na	na	na	na	na	na	na	na	na	na	na	na	na	na	na	na	na	na	na	na	266	477	74	48	70	72	86	71	56	49	na	na	na	na	na	na	na	na	na
I91R	1692	2406	na	944	931	1124	520	640	245	2358	na	na	na	na	na	na	na	na	na	na	na	na	na	na	na	na	na	na	na	na	3394	2529	518	513	516	540	611	557	441	342	na	na	na	na	na	na	na	na	na
I91S	317	283	na	214	260	166	264	402	357	3212	na	na	na	na	na	na	na	na	na	na	na	na	na	na	na	na	na	na	na	na	650	284	152	141	124	195	171	290	214	258	na	na	na	na	na	na	na	na	na
I91T	845	1661	na	552	738	816	1004	901	974	6851	na	na	na	na	na	na	na	na	na	na	na	na	na	na	na	na	na	na	na	na	1952	1085	476	473	540	534	685	769	634	816	na	na	na	na	na	na	na	na	na
I91V	275	642	14	243	360	305	537	614	449	4404	na	na	na	na	na	na	na	na	na	na	na	na	na	na	na	na	na	na	na	na	900	800	186	197	202	222	254	368	361	485	na	na	na	na	na	na	na	na	na
I91W	302	760	na	331	260	271	260	329	169	1291	na	na	na	na	na	na	na	na	na	na	na	na	na	na	na	na	na	na	na	na	892	857	196	185	239	228	302	241	199	201	na	na	na	na	na	na	na	na	na
I91Y	591	840	na	282	336	166	414	154	263	2012	na	na	na	na	na	na	na	na	na	na	na	na	na	na	na	na	na	na	na	na	1109	816	235	208	290	291	236	293	227	238	na	na	na	na	na	na	na	na	na
I94*	409	65	na	14	10	15	26	na	na	na	na	na	na	na	na	na	na	na	na	na	na	na	na	na	na	na	na	na	na	na	136	36	na	na	na	na	na	8	na	6	na	na	na	na	na	na	na	na	na
I94A	1023	1642	na	599	745	592	680	393	358	2721	na	na	na	na	na	na	na	na	na	na	na	na	na	na	na	na	na	na	na	na	2247	1969	538	394	379	527	528	548	410	392	na	na	na	na	na	na	na	na	na
I94C	401	454	na	237	223	207	415	94	156	1000	na	na	na	na	na	na	na	na	na	na	na	na	na	na	na	na	na	na	na	na	861	478	214	169	158	220	199	201	159	130	na	na	na	na	na	na	na	na	na
I94D	90	32	na	na	9	na	16	na	na	na	na	na	na	na	na	na	na	na	na	na	na	na	na	na	na	na	na	na	na	na	95	na	na	6	na	na	na	na	na	na	na	na	na	na	na	na	na	na	na
I94E	300	102	na	33	24	na	na	67	na	na	na	na	na	na	na	na	na	na	na	na	na	na	na	na	na	na	na	na	na	na	249	26	na	na	na	na	6	na	na	na	na	na	na	na	na	na	na	na	na
I94F	212	115	na	52	na	na	49	40	na	na	na	na	na	na	na	na	na	na	na	na	na	na	na	na	na	na	na	na	na	na	293	na	na	na	na	na	na	na	na	na	na	na	na	na	na	na	na	na	na
I94G	5047	6225	na	1959	1850	2929	870	664	547	2708	na	na	na	na	na	na	na	na	na	na	na	na	na	na	na	na	na	na	na	na	8981	7264	1319	957	958	1222	1139	871	497	413	na	na	na	na	na	na	na	na	na
I94H	480	134	na	35	37	14	6	12	na	na	na	na	na	na	na	na	na	na	na	na	na	na	na	na	na	na	na	na	na	na	406	11	na	9	5	7	na	na	na	na	na	na	na	na	na	na	na	na	na
I94K	835	151	na	28	na	6	6	na	na	na	na	na	na	na	na	na	na	na	na	na	na	na	na	na	na	na	na	na	na	na	401	na	na	na	na	na	na	na	na	na	na	na	na	na	na	na	na	na	na
I94L	3735	5529	na	2401	2983	2574	3000	3216	3807	29835	na	na	na	na	na	na	na	na	na	na	na	na	na	na	na	na	na	na	na	na	7759	5812	1838	1473	1655	2050	2233	2464	2398	2371	na	na	na	na	na	na	na	na	na
I94M	74	145	na	50	71	100	86	25	11	240	na	na	na	na	na	na	na	na	na	na	na	na	na	na	na	na	na	na	na	na	211	148	17	48	67	19	33	26	13	37	na	na	na	na	na	na	na	na	na
I94N	1884	1294	45	271	290	175	145	64	41	84	na	na	na	na	na	na	na	na	na	na	na	na	na	na	na	na	na	na	na	na	3212	842	224	178	173	115	76	81	32	27	na	na	na	na	na	na	na	na	na
I94P	2132	653	na	196	157	167	119	85	42	325	na	na	na	na	na	na	na	na	na	na	na	na	na	na	na	na	na	na	na	na	1986	212	78	65	44	37	42	49	35	70	na	na	na	na	na	na	na	na	na
I94Q	617	360	na	91	83	111	118	99	10	151	na	na	na	na	na	na	na	na	na	na	na	na	na	na	na	na	na	na	na	na	816	138	74	45	53	53	43	45	34	31	na	na	na	na	na	na	na	na	na
I94R	745	206	na	23	26	20	21	50	20	194	na	na	na	na	na	na	na	na	na	na	na	na	na	na	na	na	na	na	na	na	300	19	na	na	na	na	na	na	na	na	na	na	na	na	na	na	na	na	na
I94S	3482	4814	na	1614	1716	1196	1145	887	696	3940	na	na	na	na	na	na	na	na	na	na	na	na	na	na	na	na	na	na	na	na	6922	6468	1300	959	978	1240	1210	913	621	594	na	na	na	na	na	na	na	na	na
I94T	3573	4450	na	1698	1821	1625	1331	1157	959	5732	na	na	na	na	na	na	na	na	na	na	na	na	na	na	na	na	na	na	na	na	7046	6268	1283	1210	1310	1590	1363	1499	918	779	na	na	na	na	na	na	na	na	na
I94V	2053	2599	na	1164	1375	1360	1406	1310	1180	11490	na	na	na	na	na	na	na	na	na	na	na	na	na	na	na	na	na	na	na	na	3944	4893	975	757	1271	1063	1244	1316	1139	967	na	na	na	na	na	na	na	na	na
I94W	525	109	na	28	28	6	23	18	31	94	na	na	na	na	na	na	na	na	na	na	na	na	na	na	na	na	na	na	na	na	181	80	na	na	na	na	na	7	na	na	na	na	na	na	na	na	na	na	na
I94Y	280	110	na	6	18	60	15	8	na	55	na	na	na	na	na	na	na	na	na	na	na	na	na	na	na	na	na	na	na	na	119	13	7	na	na	na	na	na	na	na	na	na	na	na	na	na	na	na	na
K106*	89	55	na	na	9	na	na	na	na	na	na	na	na	na	na	na	na	na	na	na	na	na	na	na	na	na	na	na	na	na	135	9	na	7	5	14	na	na	na	na	na	na	na	na	na	na	na	na	na
K106A	1012	1249	na	497	649	498	762	714	907	4230	na	na	na	na	na	na	na	na	na	na	na	na	na	na	na	na	na	na	na	na	1916	1165	515	566	385	599	701	849	634	748	na	na	na	na	na	na	na	na	na
K106C	41	118	na	30	47	54	na	35	34	401	na	na	na	na	na	na	na	na	na	na	na	na	na	na	na	na	na	na	na	na	148	64	31	21	34	55	77	59	51	63	na	na	na	na	na	na	na	na	na
K106D	258	371	na	175	233	162	208	86	179	1782	na	na	na	na	na	na	na	na	na	na	na	na	na	na	na	na	na	na	na	na	760	436	217	123	157	224	200	226	204	180	na	na	na	na	na	na	na	na	na
K106E	1366	2123	na	904	1149	899	1472	1251	1155	8458	na	na	na	na	na	na	na	na	na	na	na	na	na	na	na	na	na	na	na	na	3461	2530	848	824	1141	1127	1244	1419	1338	1392	na	na	na	na	na	na	na	na	na
K106F	94	113	na	93	103	28	47	91	97	682	na	na	na	na	na	na	na	na	na	na	na	na	na	na	na	na	na	na	na	na	258	180	77	47	66	83	78	132	92	98	na	na	na	na	na	na	na	na	na
K106G	4299	6450	na	2551	3551	3014	3977	3768	3314	23175	na	na	na	na	na	na	na	na	na	na	na	na	na	na	na	na	na	na	na	na	10050	17	2826	2743	3138	3084	3564	3998	3558	3594	na	na	na	na	na	na	na	na	na
K106H	518	872	na	383	454	373	407	690	516	4663	na	na	na	na	na	na	na	na	na	na	na	na	na	na	na	na	na	na	na	na	1294	716	326	356	316	420	480	522	514	540	na	na	na	na	na	na	na	na	na
K106I	411	501	na	235	331	412	311	381	335	2350	na	na	na	na	na	na	na	na	na	na	na	na	na	na	na	na	na	na	na	na	826	658	153	152	202	222	220	225	244	236	na	na	na	na	na	na	na	na	na
K106L	1251	2478	na	937	1232	994	1081	1152	968	7374	na	na	na	na	na	na	na	na	na	na	na	na	na	na	na	na	na	na	na	na	3554	2956	774	792	1003	1107	1099	1269	1058	1062	na	na	na	na	na	na	na	na	na
K106M	1076	1506	na	738	875	815	930	653	802	5322	na	na	na	na	na	na	na	na	na	na	na	na	na	na	na	na	na	na	na	na	2634	2152	670	555	707	877	881	858	697	772	na	na	na	na	na	na	na	na	na
K106N	na	na	na	na	na	14	na	na	na	na	na	na	na	na	na	na	na	na	na	na	na	na	na	na	na	na	na	na	na	na	na	na	na	na	na	na	na	na	na	na	na	na	na	na	na	na	na	na	na
K106P	2173	3278	na	1262	1492	900	1269	1022	995	7789	na	na	na	na	na	na	na	na	na	na	na	na	na	na	na	na	na	na	na	na	5408	3938	1390	1160	1395	1558	1533	1609	1266	1325	na	na	na	na	na	na	na	na	na
K106Q	407	453	na	232	275	389	182	299	260	1822	na	na	na	na	na	na	na	na	na	na	na	na	na	na	na	na	na	na	na	na	1004	1122	304	292	330	368	410	377	420	374	na	na	na	na	na	na	na	na	na
K106R	1483	1814	na	838	1145	741	1001	1652	1612	8429	na	na	na	na	na	na	na	na	na	na	na	na	na	na	na	na	na	na	na	na	3779	3236	1025	953	1127	1318	1618	1726	1423	1493	na	na	na	na	na	na	na	na	na
K106S	709	652	na	311	427	407	399	389	400	3437	na	na	na	na	na	na	na	na	na	na	na	na	na	na	na	na	na	na	na	na	1259	839	463	318	474	439	376	462	467	403	na	na	na	na	na	na	na	na	na
K106T	1169	2219	na	873	1065	1261	1108	1348	1068	8994	na	na	na	na	na	na	na	na	na	na	na	na	na	na	na	na	na	na	na	na	3231	2721	858	757	800	1077	1121	1280	1209	1186	na	na	na	na	na	na	na	na	na
K106V	2460	3089	na	1446	1853	2362	2055	2106	1805	15555	na	na	na	na	na	na	na	na	na	na	na	na	na	na	na	na	na	na	na	na	5119	8	1516	1302	1345	1629	1819	2080	1962	2200	na	na	na	na	na	na	na	na	na
K106W	302	504	na	232	336	421	429	322	362	3158	na	na	na	na	na	na	na	na	na	na	na	na	na	na	na	na	na	na	na	na	987	603	271	203	325	323	339	320	366	397	na	na	na	na	na	na	na	na	na
K106Y	82	164	na	102	128	112	118	180	109	1156	na	na	na	na	na	na	na	na	na	na	na	na	na	na	na	na	na	na	na	na	297	212	75	81	64	82	142	94	111	105	na	na	na	na	na	na	na	na	na
K109*	107	23	na	na	na	na	na	na	na	na	na	na	na	na	na	na	na	na	na	na	na	na	na	na	na	na	na	na	na	na	16	na	na	na	na	na	na	na	na	na	na	na	na	na	na	na	na	na	na
K109A	1672	3130	na	1232	1421	1434	1504	1398	1294	10308	na	na	na	na	na	na	na	na	na	na	na	na	na	na	na	na	na	na	na	na	4782	3587	1546	1408	1408	1803	1695	1890	1753	1806	na	na	na	na	na	na	na	na	na
K109C	314	471	na	206	341	220	342	298	153	2156	na	na	na	na	na	na	na	na	na	na	na	na	na	na	na	na	na	na	na	na	814	368	283	191	192	269	295	267	313	281	na	na	na	na	na	na	na	na	na
K109D	367	144	na	47	30	19	36	8	15	90	na	na	na	na	na	na	na	na	na	na	na	na	na	na	na	na	na	na	na	na	494	66	84	61	22	31	27	18	11	na	na	na	na	na	na	na	na	na	na
K109E	690	577	na	205	210	80	53	48	79	365	na	na	na	na	na	na	na	na	na	na	na	na	na	na	na	na	na	na	na	na	1309	339	202	146	235	171	116	156	78	29	na	na	na	na	na	na	na	na	na
K109F	913	1329	na	539	716	745	824	915	665	5466	na	na	na	na	na	na	na	na	na	na	na	na	na	na	na	na	na	na	na	na	1865	2077	460	419	477	486	606	676	736	667	na	na	na	na	na	na	na	na	na
K109G	4311	5443	na	1732	1997	1242	1321	1289	1211	9172	na	na	na	na	na	na	na	na	na	na	na	na	na	na	na	na	na	na	na	na	9286	6125	2072	1832	2042	2307	1933	1856	1494	1387	na	na	na	na	na	na	na	na	na
K109H	873	1099	na	486	647	865	573	698	555	5946	na	na	na	na	na	na	na	na	na	na	na	na	na	na	na	na	na	na	na	na	1623	1477	347	341	445	495	617	555	541	537	na	na	na	na	na	na	na	na	na
K109I	1136	1842	na	632	842	748	711	781	809	5689	na	na	na	na	na	na	na	na	na	na	na	na	na	na	na	na	na	na	na	na	2588	1847	509	497	445	539	611	772	656	658	na	na	na	na	na	na	na	na	na
K109L	1181	1915	na	801	1097	991	1099	1252	1010	8339	na	na	na	na	na	na	na	na	na	na	na	na	na	na	na	na	na	na	na	na	2805	3081	845	656	796	949	1029	1299	1060	1104	na	na	na	na	na	na	na	na	na
K109M	1300	1970	na	770	977	982	1344	1193	1014	7458	na	na	na	na	na	na	na	na	na	na	na	na	na	na	na	na	na	na	na	na	2831	2214	777	629	970	831	971	974	895	941	na	na	na	na	na	na	na	na	na
K109N	7	10	7	na	na	na	na	na	na	na	na	na	na	na	na	na	na	na	na	na	na	na	na	na	na	na	na	na	na	na	na	18	na	6	na	na	na	8	12	8	na	na	na	na	na	na	na	na	na
K109P	1217	426	na	68	71	5	44	30	64	132	na	na	na	na	na	na	na	na	na	na	na	na	na	na	na	na	na	na	na	na	631	201	48	52	61	78	68	71	49	42	na	na	na	na	na	na	na	na	na
K109Q	94	106	na	46	87	90	70	18	112	627	na	na	na	na	na	na	na	na	na	na	na	na	na	na	na	na	na	na	na	na	222	406	45	57	34	58	63	105	97	62	na	na	na	na	na	na	na	na	na
K109R	1957	3094	na	1287	1648	1445	1719	1830	1805	14059	na	na	na	na	na	na	na	na	na	na	na	na	na	na	na	na	na	na	na	na	4483	3836	1549	1220	1513	1559	1585	2007	1758	1811	na	na	na	na	na	na	na	na	na
K109S	2638	3136	na	1337	1655	1158	1379	1647	1355	11774	na	na	na	na	na	na	na	na	na	na	na	na	na	na	na	na	na	na	na	na	8406	7439	7583	6560	6393	4786	3984	2327	1780	1729	na	na	na	na	na	na	na	na	na
K109T	3438	4915	na	2233	2789	2848	3212	3163	2153	21399	na	na	na	na	na	na	na	na	na	na	na	na	na	na	na	na	na	na	na	na	7806	6259	2310	1927	2539	2519	2839	2944	2580	2712	na	na	na	na	na	na	na	na	na
K109V	2291	3661	na	1675	2024	1651	1714	1947	1837	11381	na	na	na	na	na	na	na	na	na	na	na	na	na	na	na	na	na	na	na	na	5646	4883	1523	1211	1652	1879	1965	2124	1883	1743	na	na	na	na	na	na	na	na	na
K109W	285	641	na	222	250	103	222	163	210	1941	na	na	na	na	na	na	na	na	na	na	na	na	na	na	na	na	na	na	na	na	688	541	177	197	153	210	214	247	235	245	na	na	na	na	na	na	na	na	na
K109Y	343	490	na	230	292	237	428	331	320	2556	na	na	na	na	na	na	na	na	na	na	na	na	na	na	na	na	na	na	na	na	935	700	408	321	499	397	350	238	238	245	na	na	na	na	na	na	na	na	na
K32*	471	na	77	21	33	14	11	7	27	233	na	na	na	na	na	na	na	na	na	na	878	106	76	44	74	32	27	25	42	69	na	na	na	na	na	na	na	na	na	na	178	92	34	27	38	51	14	24	16
K32A	4	na	4766	1093	1437	1026	1410	1184	973	9631	na	na	na	na	na	na	na	na	na	na	3812	3854	1696	1752	2283	1906	2317	1225	1291	1536	na	na	na	na	na	na	na	na	na	na	12	3904	1154	1306	1617	1669	1576	1598	1290
K32C	1967	na	1205	553	740	507	394	447	406	3035	na	na	na	na	na	na	na	na	na	na	2185	1842	740	1088	1121	815	1266	500	349	685	na	na	na	na	na	na	na	na	na	na	5	1920	599	555	806	782	672	643	494
K32D	237	na	83	na	na	na	na	na	na	na	na	na	na	na	na	na	na	na	na	na	304	43	na	na	na	na	na	na	na	na	na	na	na	na	na	na	na	na	na	na	99	17	na	na	na	na	na	na	na
K32E	4036	na	5072	1160	1394	1105	1039	868	607	4708	na	na	na	na	na	na	na	na	na	na	5274	4742	1911	2019	2597	2108	2023	1263	1197	1015	na	na	na	na	na	na	na	na	na	na	10	4505	1417	1554	1947	2213	1962	1600	1352
K32F	1931	6	2691	908	1143	757	659	747	573	4155	na	na	na	na	na	na	na	na	na	na	3148	3150	1262	1391	1730	1478	1571	673	902	787	na	na	na	na	na	na	na	na	na	na	6	3288	1041	941	1202	1102	1226	1019	799
K32G	24	5	13361	4802	5439	4353	4223	3362	2950	24451	na	na	na	na	na	na	na	na	na	na	17120	14743	6434	7079	8901	7505	7107	4147	4699	4709	na	na	na	na	na	na	na	na	na	na	23	15204	5673	5211	6665	5619	6057	5194	4640
K32H	606	na	458	156	329	234	257	240	222	1424	na	na	na	na	na	na	na	na	na	na	933	981	296	329	440	374	398	234	140	156	na	na	na	na	na	na	na	na	na	na	769	804	285	268	365	314	374	302	195
K32I	1209	na	748	172	159	80	75	14	42	336	na	na	na	na	na	na	na	na	na	na	1079	836	312	327	341	219	249	108	46	57	na	na	na	na	na	na	na	na	na	na	6	776	191	244	273	186	129	160	108
K32L	30	6	9273	4113	5352	4713	5819	5791	5017	42525	na	na	na	na	na	na	na	na	na	na	12816	13927	5891	6049	8584	7787	9410	5840	7641	7771	na	na	na	na	na	na	na	na	na	na	35	13901	4676	4349	6817	6006	6844	6838	6284
K32M	3454	na	4412	1424	1775	1430	1286	1166	937	7202	na	na	na	na	na	na	na	na	na	na	5360	4462	2002	2110	2560	2187	2193	1216	1406	1758	na	na	na	na	na	na	na	na	na	na	3834	4902	1580	1555	2201	1806	1823	1549	1290
K32N	50	51	327	67	310	125	136	164	53	531	na	na	na	na	na	na	na	na	na	na	86	129	na	29	121	77	97	82	42	48	na	na	na	na	na	na	na	na	na	na	27	86	na	16	129	95	63	115	38
K32P	375	na	127	29	32	53	7	7	6	160	na	na	na	na	na	na	na	na	na	na	667	61	37	25	49	34	18	17	11	18	na	na	na	na	na	na	na	na	na	na	326	61	22	21	32	40	17	12	11
K32Q	1298	na	2700	902	1262	994	780	483	856	6483	na	na	na	na	na	na	na	na	na	na	3443	3697	1413	1516	1900	1621	1848	950	1178	1192	na	na	na	na	na	na	na	na	na	na	2571	3337	1070	1057	1506	1413	1385	1352	1108
K32R	30	18	13287	5554	7310	5077	6172	4775	5396	32731	na	na	na	na	na	na	na	na	na	na	20540	7	8747	8959	11547	10157	10872	5646	6591	7632	na	na	na	na	na	na	na	na	na	na	41	20233	6921	6606	8432	7510	8195	6947	5885
K32S	4	na	3519	1431	1816	1365	1639	1503	1434	9609	na	na	na	na	na	na	na	na	na	na	4833	4789	2144	2133	2906	2661	2805	1627	2027	1765	na	na	na	na	na	na	na	na	na	na	5	4926	1476	1428	2287	1997	2179	1908	1726
K32T	49	16	3049	705	1612	2249	621	657	537	2746	na	na	na	na	na	na	na	na	na	na	3001	2762	1093	949	2017	1252	1397	620	642	617	na	na	na	na	na	na	na	na	na	na	6	10	910	882	1394	919	1046	1041	824
K32V	33	na	5419	2412	2991	2110	2586	2505	2276	16355	na	na	na	na	na	na	na	na	na	na	7885	7837	3604	3495	5144	4446	5247	2827	3563	3861	na	na	na	na	na	na	na	na	na	na	16	8270	2536	2599	3964	3422	3685	3420	3085
K32W	33	na	4625	1652	1970	1686	1126	968	627	4850	na	na	na	na	na	na	na	na	na	na	6888	5629	2515	2491	2859	2193	2556	954	1225	911	na	na	na	na	na	na	na	na	na	na	6	5970	2179	1870	2379	1757	1916	1563	1095
K32Y	976	na	894	488	421	388	431	352	258	2914	na	na	na	na	na	na	na	na	na	na	1366	1409	625	589	978	620	692	403	497	535	na	na	na	na	na	na	na	na	na	na	941	1544	438	432	634	485	704	455	402
K38*	85	na	66	10	7	na	na	na	na	na	na	na	na	na	na	na	na	na	na	na	398	62	24	25	15	10	na	na	na	25	na	na	na	na	na	na	na	na	na	na	142	25	20	8	na	na	na	na	na
K38A	6	na	3438	1248	1461	1303	1217	1367	1336	8133	na	na	na	na	na	na	na	na	na	na	4585	4745	2063	2215	2892	2409	2476	1496	1815	1975	na	na	na	na	na	na	na	na	na	na	3615	4855	1618	1633	1702	1589	1814	1517	1325
K38C	1414	na	1344	715	836	459	887	802	978	6702	na	na	na	na	na	na	na	na	na	na	2120	2278	1024	1070	1483	1318	1446	910	1545	1506	na	na	na	na	na	na	na	na	na	na	1648	2413	1019	714	960	843	1035	970	941
K38D	1123	na	952	270	239	169	139	170	99	826	na	na	na	na	na	na	na	na	na	na	1609	738	423	359	497	305	206	141	223	195	na	na	na	na	na	na	na	na	na	na	1337	843	312	325	337	349	353	283	215
K38E	1257	na	1395	202	237	94	240	184	81	529	na	na	na	na	na	na	na	na	na	na	1402	7	399	391	331	316	343	178	234	213	na	na	na	na	na	na	na	na	na	na	8	770	315	308	340	482	339	261	165
K38F	12	na	4609	1678	1968	1677	2061	1661	1841	15988	na	na	na	na	na	na	na	na	na	na	5444	5931	2796	2807	3526	3372	6244	2323	3170	3938	na	na	na	na	na	na	na	na	na	na	15	5916	1822	1984	2694	2681	2286	2315	2267
K38G	3428	na	3753	1366	1789	1699	1516	1474	1488	11338	na	na	na	na	na	na	na	na	na	na	5198	7	2590	2746	3408	3259	3245	1677	2497	2571	na	na	na	na	na	na	na	na	na	na	19	5617	1676	1790	2096	2171	1853	1682	1545
K38H	7	na	4288	1741	2077	1708	1829	1525	1563	13429	na	na	na	na	na	na	na	na	na	na	4937	5669	2553	2690	3493	3044	3789	2050	2411	2618	na	na	na	na	na	na	na	na	na	na	14	13	1987	1908	2442	2707	2785	2344	2175
K38I	7	na	2407	709	745	967	931	672	713	5871	na	na	na	na	na	na	na	na	na	na	2667	2537	1284	1399	1542	1447	1376	896	1075	1368	na	na	na	na	na	na	na	na	na	na	5	2820	1140	912	1132	1551	1147	993	805
K38L	15	na	7395	3277	4061	3096	3557	4169	3967	26809	na	na	na	na	na	na	na	na	na	na	11300	7	5385	5747	7569	6910	6424	4437	6775	6924	na	na	na	na	na	na	na	na	na	na	47	11974	3799	3811	4794	4550	4786	4428	4190
K38M	879	12	1160	479	468	662	308	330	409	3622	na	na	na	na	na	na	na	na	na	na	1594	1555	648	754	846	719	969	433	607	430	na	na	na	na	na	na	na	na	na	na	1172	1577	547	551	545	436	568	484	414
K38N	125	807	1564	207	154	348	3785	2849	380	1341	na	na	na	na	na	na	na	na	na	na	na	31	na	na	na	na	97	na	51	na	na	na	na	na	na	na	na	na	na	na	na	na	11	na	na	na	na	na	na
K38P	3560	na	782	177	149	48	33	137	107	779	na	na	na	na	na	na	na	na	na	na	5530	645	335	285	316	152	119	101	84	118	na	na	na	na	na	na	na	na	na	na	2796	487	480	222	136	174	131	83	71
K38Q	650	na	1053	187	179	18	56	81	34	596	na	na	na	na	na	na	na	na	na	na	1363	856	411	360	403	334	234	127	106	178	na	na	na	na	na	na	na	na	na	na	1063	1024	328	285	301	272	270	208	166
K38R	26	21	2525	1311	1819	1873	2001	2079	1957	14458	na	na	na	na	na	na	na	na	na	na	3855	4836	2040	2539	3164	2969	3968	1991	3012	3728	na	na	na	na	na	na	na	na	na	na	8	4578	1684	1577	2100	2081	2407	2409	2332
K38S	10	na	6711	2825	3263	2748	2875	3307	2930	23668	na	na	na	na	na	na	na	na	na	na	9320	10533	4626	5068	6109	5635	7803	3847	6143	5908	na	na	na	na	na	na	na	na	na	na	22	10679	3374	3382	4448	4160	4273	3873	3764
K38T	53	263	5819	2151	2737	2346	2777	3433	2775	20876	na	na	na	na	na	na	na	na	na	na	6899	7525	3537	3508	4506	4387	5519	3093	4506	5337	na	na	na	na	na	na	na	na	na	na	17	7212	2635	2330	3403	2789	3271	3161	2879
K38V	4	na	5096	1494	1730	1389	1503	1259	1335	9107	na	na	na	na	na	na	na	na	na	na	5854	6125	2646	2606	3234	2857	3485	1666	2255	2481	na	na	na	na	na	na	na	na	na	na	13	6050	1920	1795	2531	1774	2123	1726	1696
K38W	1262	na	1058	304	319	224	321	94	190	1500	na	na	na	na	na	na	na	na	na	na	1377	1234	609	670	614	521	508	313	571	304	na	na	na	na	na	na	na	na	na	na	1183	1240	422	389	497	504	440	337	298
K38Y	1874	na	2652	820	918	716	722	975	851	5650	na	na	na	na	na	na	na	na	na	na	2842	3162	1473	1420	1849	1616	1630	1149	1367	1682	na	na	na	na	na	na	na	na	na	na	2089	2888	1112	931	1165	956	1036	1085	909
K58*	na	na	na	na	na	na	na	na	na	na	65	96	25	17	7	20	61	na	6	35	570	105	47	41	50	41	11	31	29	na	na	na	na	na	na	na	na	na	na	na	249	79	24	23	30	23	44	24	23
K58A	na	na	na	na	na	na	na	na	na	na	251	3413	1004	1164	149	1384	1003	1028	1036	1472	3626	3566	1934	1706	1763	1782	2239	1626	2016	3759	na	na	na	na	na	na	na	na	na	na	2265	3125	1073	1226	1745	1971	1762	1621	1583
K58C	na	na	na	na	na	na	na	na	na	na	265	3697	1000	998	149	1053	1139	1256	1403	1424	3795	3481	1935	1706	1701	1680	1860	1627	2045	1996	na	na	na	na	na	na	na	na	na	na	2378	3238	1109	1349	1704	1925	1712	1706	1626
K58D	na	na	na	na	na	na	na	na	na	na	184	2351	732	633	89	622	585	864	645	864	2014	2246	1220	1167	1083	1141	1282	956	1245	1305	na	na	na	na	na	na	na	na	na	na	1242	2057	678	690	927	1081	1073	1040	926
K58E	na	na	na	na	na	na	na	na	na	na	275	3287	934	1023	120	832	1101	1345	920	1351	3120	3199	1786	1664	1641	1557	2027	1482	1724	1922	na	na	na	na	na	na	na	na	na	na	2335	3104	1337	1101	1736	1518	1706	1561	1438
K58F	na	na	na	na	na	na	na	na	na	na	490	6157	1742	1601	239	1659	2256	2081	2159	2625	5510	6343	3531	3179	3372	3202	3990	2782	3530	4009	na	na	na	na	na	na	na	na	na	na	4075	5631	2210	2123	3371	2835	3102	3145	2922
K58G	na	na	na	na	na	na	na	na	na	na	1112	14214	4210	3596	510	3754	4395	3943	3165	4768	13888	14247	8048	6799	7230	6545	7425	5379	7530	6774	na	na	na	na	na	na	na	na	na	na	9946	13020	5032	4769	7155	5781	6460	6182	5468
K58H	na	na	na	na	na	na	na	na	na	na	126	1595	450	431	50	507	488	519	398	697	1146	1587	857	867	881	728	1112	679	1259	1164	na	na	na	na	na	na	na	na	na	na	1057	1567	570	516	942	963	772	839	667
K58I	na	na	na	na	na	na	na	na	na	na	110	1653	525	487	72	506	440	565	584	830	1615	1608	875	807	859	880	992	746	1053	1251	na	na	na	na	na	na	na	na	na	na	1161	1366	470	483	1013	555	829	773	751
K58L	na	na	na	na	na	na	na	na	na	na	1110	14624	4387	4288	514	4626	6063	4328	5368	6654	14143	14904	8407	7500	7863	7383	8774	6906	9290	10275	na	na	na	na	na	na	na	na	na	na	9917	13740	5388	5102	7422	7662	7880	7683	7080
K58M	na	na	na	na	na	na	na	na	na	na	254	3616	1041	1076	116	1146	1191	1292	1240	1737	2994	3375	1926	1729	1907	1658	2339	1647	2363	2901	na	na	na	na	na	na	na	na	na	na	2175	3101	1193	1067	1697	1740	1809	1845	1719
K58N	na	na	na	na	na	na	na	na	na	na	70	919	178	222	24	110	218	194	412	410	739	828	310	204	213	156	398	256	236	329	na	na	na	na	na	na	na	na	na	na	523	766	329	259	220	255	349	380	285
K58P	na	na	na	na	na	na	na	na	na	na	312	3481	1064	974	143	994	1130	1056	1185	1498	4257	4019	2425	1897	1975	1943	2695	1745	2198	2934	na	na	na	na	na	na	na	na	na	na	2610	3772	1356	1391	2058	2159	2106	2117	2048
K58Q	na	na	na	na	na	na	na	na	na	na	285	3363	1058	990	120	730	1164	1191	1018	1364	3738	3343	1926	1597	1676	1660	2156	1575	2282	2590	na	na	na	na	na	na	na	na	na	na	2255	3002	1400	1217	1646	1594	1638	1826	1504
K58R	na	na	na	na	na	na	na	na	na	na	881	11875	3520	3237	424	3490	4727	3551	4586	5513	11476	11951	6355	5793	6258	5951	6691	5479	7027	8135	na	na	na	na	na	na	na	na	na	na	7650	10913	4202	4309	5926	6004	6109	6367	5585
K58S	na	na	na	na	na	na	na	na	na	na	520	7237	2164	1992	253	1804	2995	2062	2169	2824	6429	7179	3912	3542	3860	3802	4169	3137	4185	4093	na	na	na	na	na	na	na	na	na	na	4853	6608	2754	2687	3432	3466	3487	3434	2938
K58T	na	na	na	na	na	na	na	na	na	na	191	2702	718	877	100	827	918	755	827	1060	1987	2707	1532	1294	1383	1296	1612	1036	1463	1440	na	na	na	na	na	na	na	na	na	na	1921	2569	934	1046	1465	1257	1466	1142	1113
K58V	na	na	na	na	na	na	na	na	na	na	755	10404	3045	2948	410	2742	4082	3398	4654	4756	9833	10016	5762	4799	5139	5012	5946	4731	6476	7385	na	na	na	na	na	na	na	na	na	na	6624	9225	3680	3357	5108	5138	5245	5222	4983
K58W	na	na	na	na	na	na	na	na	na	na	524	7896	2246	2224	272	1823	2671	2253	2011	2872	5373	7096	3952	3462	3522	3341	4076	2953	3997	4218	na	na	na	na	na	na	na	na	na	na	4867	6468	2668	2338	3653	3181	3623	3136	2807
K58Y	na	na	na	na	na	na	na	na	na	na	182	2678	795	844	93	714	878	882	1100	1011	2061	2554	1524	1196	1243	1315	1099	1095	1893	1510	na	na	na	na	na	na	na	na	na	na	1687	2338	944	851	1401	1144	1294	1208	1115
K76*	na	na	na	na	na	na	na	na	na	na	17	13	19	na	5	na	8	na	23	7	na	na	na	na	na	na	na	na	na	na	na	na	na	na	na	na	na	na	na	na	na	na	na	na	na	na	na	na	na
K76A	na	na	na	na	na	na	na	na	na	na	391	5695	1972	1665	267	1991	2398	2236	2270	2955	4938	5697	2864	2648	2870	2561	3168	2628	3255	3992	na	na	na	na	na	na	na	na	na	na	3812	5177	1824	1819	2563	2853	2673	2652	2519
K76C	na	na	na	na	na	na	na	na	na	na	126	1722	619	685	61	553	722	765	721	978	1548	1448	695	691	784	734	719	644	715	918	na	na	na	na	na	na	na	na	na	na	969	1298	404	527	681	513	703	710	615
K76D	na	na	na	na	na	na	na	na	na	na	170	2251	805	654	89	797	1161	799	1173	1244	1512	1974	980	972	876	956	1378	870	1341	1359	na	na	na	na	na	na	na	na	na	na	1146	1737	624	639	912	910	842	936	807
K76E	na	na	na	na	na	na	na	na	na	na	185	2745	572	739	108	885	1386	1083	1476	1317	2099	2284	802	519	533	609	897	851	1015	1413	na	na	na	na	na	na	na	na	na	na	1495	2090	536	470	863	638	652	913	832
K76F	na	na	na	na	na	na	na	na	na	na	113	1618	606	558	73	647	839	692	749	860	1100	1571	825	707	719	725	863	682	917	1102	na	na	na	na	na	na	na	na	na	na	1201	1491	491	478	854	977	751	762	708
K76G	na	na	na	na	na	na	na	na	na	na	1072	13455	4487	4155	540	3843	5199	5020	5391	6132	10	12163	6655	5747	6145	6006	6012	5969	6799	7342	na	na	na	na	na	na	na	na	na	na	8882	12048	4379	4325	6533	5802	6287	6186	5517
K76H	na	na	na	na	na	na	na	na	na	na	132	1426	481	429	52	478	640	505	573	608	1464	1234	684	609	624	584	562	586	727	728	na	na	na	na	na	na	na	na	na	na	909	1291	401	447	789	632	567	661	555
K76I	na	na	na	na	na	na	na	na	na	na	136	1932	654	550	82	507	731	830	1069	1064	1411	2036	914	869	803	893	956	920	1359	1460	na	na	na	na	na	na	na	na	na	na	1136	1662	767	562	907	834	922	901	825
K76L	na	na	na	na	na	na	na	na	na	na	452	5957	1893	1827	257	1997	2040	2293	2550	3149	5310	5803	2874	2503	2751	2684	3015	2617	3191	4291	na	na	na	na	na	na	na	na	na	na	4146	5321	1915	1779	2825	2722	2946	2879	2481
K76M	na	na	na	na	na	na	na	na	na	na	38	547	73	42	28	149	118	273	103	36	na	na	na	na	na	na	na	na	na	na	na	na	na	na	na	na	na	na	na	na	15	na	na	na	na	na	na	na	na
K76N	na	na	na	na	na	na	na	na	na	na	77	1023	35	23	13	24	219	73	47	27	879	897	na	na	na	na	18	na	na	na	na	na	na	na	na	na	na	na	na	na	722	694	na	na	na	26	na	na	na
K76P	na	na	na	na	na	na	na	na	na	na	374	4487	1530	1445	201	1503	1698	1468	1869	1993	3407	4470	2126	2024	2153	1926	2028	1946	2322	2129	na	na	na	na	na	na	na	na	na	na	2966	3995	1323	1439	2075	2198	1864	1998	1804
K76Q	na	na	na	na	na	na	na	na	na	na	28	210	158	268	13	5	na	81	239	404	na	147	8	na	na	8	18	na	na	na	na	na	na	na	na	na	na	na	na	na	221	43	na	na	na	na	na	na	na
K76R	na	na	na	na	na	na	na	na	na	na	383	5796	1080	1255	196	1454	1844	1401	2643	2155	5632	5315	1679	1406	1446	1370	2101	1672	2250	2465	na	na	na	na	na	na	na	na	na	na	3211	5096	1042	912	1554	1199	1447	1474	1311
K76S	na	na	na	na	na	na	na	na	na	na	411	5543	1813	1845	235	2108	1801	2097	2240	2647	5716	5485	2840	2265	2742	2378	3526	2517	3035	3338	na	na	na	na	na	na	na	na	na	na	3753	4884	1864	1816	2768	2637	2848	2417	2209
K76T	na	na	na	na	na	na	na	na	na	na	204	2984	573	616	103	591	1001	777	1507	1171	2394	2975	914	760	939	850	967	845	992	1095	na	na	na	na	na	na	na	na	na	na	1647	2795	667	594	1217	701	906	889	811
K76V	na	na	na	na	na	na	na	na	na	na	522	7608	2418	2455	324	2857	3697	4951	3467	4341	6521	7474	3530	3198	3310	3381	3833	3329	4537	4585	na	na	na	na	na	na	na	na	na	na	4857	6688	2150	2144	3304	3431	3418	3644	3497
K76W	na	na	na	na	na	na	na	na	na	na	174	2260	827	803	91	780	1296	704	893	936	2090	2309	1160	1075	1239	1058	1332	1069	1309	1372	na	na	na	na	na	na	na	na	na	na	1471	2209	710	697	1181	1182	1030	1048	914
K76Y	na	na	na	na	na	na	na	na	na	na	139	1685	645	530	70	451	878	889	657	975	1256	1603	854	669	715	705	1553	730	919	885	na	na	na	na	na	na	na	na	na	na	1127	1395	511	540	776	700	729	763	709
L104*	44	5	47	na	26	14	54	6	8	na	na	na	na	na	na	na	na	na	na	na	na	na	na	na	na	na	na	na	na	na	na	na	na	na	na	na	na	na	na	na	na	na	na	na	na	na	na	na	na
L104A	155	206	na	98	122	141	45	127	38	487	na	na	na	na	na	na	na	na	na	na	na	na	na	na	na	na	na	na	na	na	77	54	28	26	29	33	29	6	15	34	na	na	na	na	na	na	na	na	na
L104C	35	87	na	62	64	72	28	78	54	324	na	na	na	na	na	na	na	na	na	na	na	na	na	na	na	na	na	na	na	na	54	78	30	19	14	26	24	13	11	17	na	na	na	na	na	na	na	na	na
L104D	na	9	na	8	na	na	na	na	na	na	na	na	na	na	na	na	na	na	na	na	na	na	na	na	na	na	na	na	na	na	12	na	na	na	na	na	na	na	na	na	na	na	na	na	na	na	na	na	na
L104E	143	233	na	116	113	118	120	18	19	249	na	na	na	na	na	na	na	na	na	na	na	na	na	na	na	na	na	na	na	na	63	30	20	11	19	15	13	19	8	19	na	na	na	na	na	na	na	na	na
L104F	33	na	na	na	na	na	na	na	8	na	na	na	na	na	na	na	na	na	na	na	na	na	na	na	na	na	na	na	na	na	na	na	na	6	na	na	na	na	na	na	na	na	na	na	na	na	na	na	na
L104G	522	1031	na	337	322	144	202	187	152	1040	na	na	na	na	na	na	na	na	na	na	na	na	na	na	na	na	na	na	na	na	370	305	81	91	81	84	92	68	45	33	na	na	na	na	na	na	na	na	na
L104H	48	67	na	36	28	na	28	11	19	44	na	na	na	na	na	na	na	na	na	na	na	na	na	na	na	na	na	na	na	na	34	na	6	11	na	9	17	6	9	na	na	na	na	na	na	na	na	na	na
L104I	134	274	na	107	82	34	78	62	48	579	na	na	na	na	na	na	na	na	na	na	na	na	na	na	na	na	na	na	na	na	24	12	5	na	na	na	na	na	na	na	na	na	na	na	na	na	na	na	na
L104K	45	168	na	41	36	na	6	36	6	na	na	na	na	na	na	na	na	na	na	na	na	na	na	na	na	na	na	na	na	na	na	na	na	na	na	na	na	na	na	na	na	na	na	na	na	na	na	na	na
L104M	na	5	na	na	na	na	na	na	na	na	na	na	na	na	na	na	na	na	na	na	na	na	na	na	na	na	na	na	na	na	na	na	na	5	na	na	na	na	na	na	na	na	na	na	na	na	na	na	na
L104N	13	29	na	14	na	na	na	na	na	na	na	na	na	na	na	na	na	na	na	na	na	na	na	na	na	na	na	na	na	na	20	na	na	10	na	na	na	na	na	na	na	na	na	na	na	na	na	na	na
L104P	22	na	na	na	na	na	na	na	na	na	na	na	na	na	na	na	na	na	na	na	na	na	na	na	na	na	na	na	na	na	28	na	na	na	na	na	na	na	na	na	na	na	na	na	na	na	na	na	na
L104Q	54	221	na	78	86	157	72	31	75	304	na	na	na	na	na	na	na	na	na	na	na	na	na	na	na	na	na	na	na	na	56	26	24	9	7	11	24	8	14	16	na	na	na	na	na	na	na	na	na
L104R	354	685	na	209	182	111	262	85	67	346	na	na	na	na	na	na	na	na	na	na	na	na	na	na	na	na	na	na	na	na	260	266	44	103	33	43	7	28	13	9	na	na	na	na	na	na	na	na	na
L104S	61	296	na	97	84	110	80	45	40	442	na	na	na	na	na	na	na	na	na	na	na	na	na	na	na	na	na	na	na	na	87	91	37	35	12	17	26	8	18	7	na	na	na	na	na	na	na	na	na
L104T	74	224	na	59	64	11	24	na	7	184	na	na	na	na	na	na	na	na	na	na	na	na	na	na	na	na	na	na	na	na	38	na	25	8	na	na	10	na	na	na	na	na	na	na	na	na	na	na	na
L104V	13	197	na	84	120	214	92	99	59	505	na	na	na	na	na	na	na	na	na	na	na	na	na	na	na	na	na	na	na	na	49	101	10	5	14	7	17	17	7	na	na	na	na	na	na	na	na	na	na
L104Y	29	136	na	77	71	96	36	47	11	100	na	na	na	na	na	na	na	na	na	na	na	na	na	na	na	na	na	na	na	na	51	26	8	8	na	13	na	na	na	na	na	na	na	na	na	na	na	na	na
L110A	1198	1981	na	567	574	311	339	483	316	1771	na	na	na	na	na	na	na	na	na	na	na	na	na	na	na	na	na	na	na	na	3067	2687	669	547	635	650	571	507	268	269	na	na	na	na	na	na	na	na	na
L110C	81	115	na	59	53	41	42	87	31	137	na	na	na	na	na	na	na	na	na	na	na	na	na	na	na	na	na	na	na	na	125	82	31	20	35	36	32	44	36	30	na	na	na	na	na	na	na	na	na
L110D	212	25	na	na	na	na	na	na	na	na	na	na	na	na	na	na	na	na	na	na	na	na	na	na	na	na	na	na	na	na	22	na	na	na	na	na	na	na	na	na	na	na	na	na	na	na	na	na	na
L110F	166	361	na	139	150	50	62	156	176	1358	na	na	na	na	na	na	na	na	na	na	na	na	na	na	na	na	na	na	na	na	592	475	107	90	130	128	128	176	89	111	na	na	na	na	na	na	na	na	na
L110G	1407	377	na	156	87	68	37	50	110	73	na	na	na	na	na	na	na	na	na	na	na	na	na	na	na	na	na	na	na	na	1202	54	22	23	287	20	na	na	na	na	na	na	na	na	na	na	na	na	na
L110I	4	na	na	na	na	na	na	na	na	na	na	na	na	na	na	na	na	na	na	na	na	na	na	na	na	na	na	na	na	na	na	na	na	na	na	na	na	na	na	na	na	na	na	na	na	na	na	na	na
L110M	na	na	na	na	na	na	na	na	na	na	na	na	na	na	na	na	na	na	na	na	na	na	na	na	na	na	na	na	na	na	9	na	na	na	18	7	na	na	na	na	na	na	na	na	na	na	na	na	na
L110P	350	80	na	6	na	42	na	na	na	na	na	na	na	na	na	na	na	na	na	na	na	na	na	na	na	na	na	na	na	na	167	20	na	na	na	na	na	na	na	na	na	na	na	na	na	na	na	na	na
L110Q	na	na	na	na	na	na	na	na	na	na	na	na	na	na	na	na	na	na	na	na	na	na	na	na	na	na	na	na	na	na	8	9	21	17	31	15	13	42	21	40	na	na	na	na	na	na	na	na	na
L110R	5	na	na	na	na	na	na	na	na	na	na	na	na	na	na	na	na	na	na	na	na	na	na	na	na	na	na	na	na	na	na	na	na	na	na	na	na	na	na	na	na	na	na	na	na	na	na	na	na
L110S	457	265	na	86	42	36	54	na	38	na	na	na	na	na	na	na	na	na	na	na	na	na	na	na	na	na	na	na	na	na	839	247	67	94	52	74	32	23	7	17	na	na	na	na	na	na	na	na	na
L110T	1328	777	na	173	173	152	116	128	1033	318	na	na	na	na	na	na	na	na	na	na	na	na	na	na	na	na	na	na	na	na	1855	541	445	206	204	167	131	124	64	64	na	na	na	na	na	na	na	na	na
L110V	675	843	na	399	409	635	394	361	267	2161	na	na	na	na	na	na	na	na	na	na	na	na	na	na	na	na	na	na	na	na	1398	1000	327	233	227	325	301	413	290	268	na	na	na	na	na	na	na	na	na
L110W	62	100	na	13	8	19	na	na	na	na	na	na	na	na	na	na	na	na	na	na	na	na	na	na	na	na	na	na	na	na	318	75	38	16	13	12	11	9	na	na	na	na	na	na	na	na	na	na	na
L110Y	99	43	na	9	na	na	na	14	na	na	na	na	na	na	na	na	na	na	na	na	na	na	na	na	na	na	na	na	na	na	121	77	na	na	na	na	na	na	na	na	na	na	na	na	na	na	na	na	na
L112*	693	na	na	na	na	na	na	na	na	na	na	na	na	na	na	na	na	na	na	na	na	na	na	na	na	na	na	na	na	na	na	na	7	10	na	na	na	na	na	7	na	na	na	na	na	na	na	na	na
L112A	1680	1529	na	578	618	573	581	397	718	1752	na	na	na	na	na	na	na	na	na	na	na	na	na	na	na	na	na	na	na	na	3908	1951	609	470	608	610	495	482	289	240	na	na	na	na	na	na	na	na	na
L112C	991	1137	na	431	459	459	467	386	472	2802	na	na	na	na	na	na	na	na	na	na	na	na	na	na	na	na	na	na	na	na	1939	940	582	491	576	614	599	587	488	502	na	na	na	na	na	na	na	na	na
L112D	613	115	na	18	23	23	9	35	9	na	na	na	na	na	na	na	na	na	na	na	na	na	na	na	na	na	na	na	na	na	195	58	na	na	na	na	na	na	na	na	na	na	na	na	na	na	na	na	na
L112E	664	70	na	na	na	na	na	na	na	na	na	na	na	na	na	na	na	na	na	na	na	na	na	na	na	na	na	na	na	na	368	na	na	na	na	na	na	na	na	na	na	na	na	na	na	na	na	na	na
L112F	3848	5663	na	2579	3470	3689	3651	3917	3395	28263	na	na	na	na	na	na	na	na	na	na	na	na	na	na	na	na	na	na	na	na	9483	7624	2835	2465	2941	3624	3723	4648	3846	3363	na	na	na	na	na	na	na	na	na
L112G	3875	1203	na	242	194	187	137	156	52	689	na	na	na	na	na	na	na	na	na	na	na	na	na	na	na	na	na	na	na	na	3295	373	69	62	28	34	7	32	na	23	na	na	na	na	na	na	na	na	na
L112H	1083	614	na	209	30	22	na	16	90	na	na	na	na	na	na	na	na	na	na	na	na	na	na	na	na	na	na	na	na	na	2273	765	153	150	79	45	na	na	na	na	na	na	na	na	na	na	na	na	na
L112I	249	235	na	na	na	na	na	na	na	na	na	na	na	na	na	na	na	na	na	na	na	na	na	na	na	na	na	na	na	na	340	237	na	na	na	na	na	na	na	na	na	na	na	na	na	na	na	na	na
L112M	na	na	na	na	na	na	na	na	na	na	na	na	na	na	na	na	na	na	na	na	na	na	na	na	na	na	na	na	na	na	na	42	na	na	8	na	na	7	6	na	na	na	na	na	na	na	na	na	na
L112N	1286	474	na	273	51	na	15	na	na	na	na	na	na	na	na	na	na	na	na	na	na	na	na	na	na	na	na	na	na	na	1500	320	58	53	32	na	na	na	na	na	na	na	na	na	na	na	na	na	na
L112P	2731	727	na	153	164	58	55	139	45	414	na	na	na	na	na	na	na	na	na	na	na	na	na	na	na	na	na	na	na	na	1657	132	65	24	41	70	35	37	26	32	na	na	na	na	na	na	na	na	na
L112Q	na	na	na	na	na	na	na	na	na	na	na	na	na	na	na	na	na	na	na	na	na	na	na	na	na	na	na	na	na	na	na	37	na	na	na	na	na	na	na	na	na	na	na	na	na	na	na	na	na
L112R	527	302	na	35	14	na	na	na	na	na	na	na	na	na	na	na	na	na	na	na	na	na	na	na	na	na	na	na	na	na	729	36	29	29	9	7	na	na	na	13	na	na	na	na	na	na	na	na	na
L112S	1604	595	na	278	155	126	67	40	20	91	na	na	na	na	na	na	na	na	na	na	na	na	na	na	na	na	na	na	na	na	1845	90	197	63	89	62	44	32	46	35	na	na	na	na	na	na	na	na	na
L112T	2230	1447	na	505	482	260	269	241	250	860	na	na	na	na	na	na	na	na	na	na	na	na	na	na	na	na	na	na	na	na	3884	1810	654	483	497	588	420	423	250	163	na	na	na	na	na	na	na	na	na
L112V	1851	2897	na	1266	1601	1486	1775	1851	1550	11494	na	na	na	na	na	na	na	na	na	na	na	na	na	na	na	na	na	na	na	na	4628	4113	1401	1198	1291	1630	1809	1814	1521	1772	na	na	na	na	na	na	na	na	na
L112W	2714	2475	na	778	825	792	455	594	307	2217	na	na	na	na	na	na	na	na	na	na	na	na	na	na	na	na	na	na	na	na	4634	2556	919	983	780	797	629	536	391	312	na	na	na	na	na	na	na	na	na
L112Y	878	829	na	283	290	165	171	182	246	828	na	na	na	na	na	na	na	na	na	na	na	na	na	na	na	na	na	na	na	na	1743	751	398	307	404	350	346	306	185	180	na	na	na	na	na	na	na	na	na
L156*	na	na	na	na	na	na	na	na	na	na	241	18	17	na	2	16	na	15	32	9	na	na	na	na	na	na	na	na	na	na	124	32	na	7	na	na	na	na	na	6	na	na	na	na	na	na	na	na	na
L156A	na	na	na	na	na	na	na	na	na	na	962	684	499	165	35	217	324	276	484	425	na	na	na	na	na	na	na	na	na	na	799	1257	282	274	313	364	337	444	279	330	na	na	na	na	na	na	na	na	na
L156C	na	na	na	na	na	na	na	na	na	na	595	459	220	94	12	169	310	170	95	128	na	na	na	na	na	na	na	na	na	na	719	757	148	148	206	206	237	176	143	180	na	na	na	na	na	na	na	na	na
L156D	na	na	na	na	na	na	na	na	na	na	490	147	118	65	3	39	20	96	na	18	na	na	na	na	na	na	na	na	na	na	500	255	171	105	68	66	73	18	14	13	na	na	na	na	na	na	na	na	na
L156E	na	na	na	na	na	na	na	na	na	na	1	438	489	167	20	115	140	79	104	90	na	na	na	na	na	na	na	na	na	na	1030	766	302	254	275	310	220	156	64	76	na	na	na	na	na	na	na	na	na
L156F	na	na	na	na	na	na	na	na	na	na	2044	1749	1219	541	94	592	1261	1394	1558	1596	na	na	na	na	na	na	na	na	na	na	26	3011	678	578	717	1040	1142	1279	1242	1253	na	na	na	na	na	na	na	na	na
L156G	na	na	na	na	na	na	na	na	na	na	2995	982	912	400	56	189	259	272	146	173	na	na	na	na	na	na	na	na	na	na	2532	1576	545	494	718	492	323	256	133	132	na	na	na	na	na	na	na	na	na
L156H	na	na	na	na	na	na	na	na	na	na	1168	924	605	390	40	208	331	371	402	457	na	na	na	na	na	na	na	na	na	na	1106	1463	315	317	382	405	448	420	366	394	na	na	na	na	na	na	na	na	na
L156I	na	na	na	na	na	na	na	na	na	na	1161	762	575	218	39	342	266	433	434	541	na	na	na	na	na	na	na	na	na	na	1175	1345	267	268	394	402	436	480	487	440	na	na	na	na	na	na	na	na	na
L156K	na	na	na	na	na	na	na	na	na	na	1	2824	1875	805	165	1113	1615	1597	2003	2221	na	na	na	na	na	na	na	na	na	na	3474	4522	1077	983	1245	1623	1701	1828	1724	1826	na	na	na	na	na	na	na	na	na
L156M	na	na	na	na	na	na	na	na	na	na	na	7	9	13	7	na	na	na	8	7	na	na	na	na	na	na	na	na	na	na	na	na	na	na	na	na	na	na	na	na	na	na	na	na	na	na	na	na	na
L156N	na	na	na	na	na	na	na	na	na	na	1617	1312	764	305	33	289	331	435	359	412	na	na	na	na	na	na	na	na	na	na	1499	1796	343	415	520	528	496	388	319	323	na	na	na	na	na	na	na	na	na
L156P	na	na	na	na	na	na	na	na	na	na	2	102	59	12	6	6	28	29	18	9	na	na	na	na	na	na	na	na	na	na	259	97	8	23	29	19	15	14	9	12	na	na	na	na	na	na	na	na	na
L156Q	na	na	na	na	na	na	na	na	na	na	3	na	39	4	7	10	na	5	na	19	na	na	na	na	na	na	na	na	na	na	na	na	na	na	na	na	na	na	na	na	na	na	na	na	na	na	na	na	na
L156R	na	na	na	na	na	na	na	na	na	na	2	2726	1667	694	125	976	1576	1262	1811	2035	na	na	na	na	na	na	na	na	na	na	2750	4054	929	910	1274	1426	1507	1613	1432	1535	na	na	na	na	na	na	na	na	na
L156S	na	na	na	na	na	na	na	na	na	na	3537	3033	1781	821	117	791	1100	1204	1580	1589	na	na	na	na	na	na	na	na	na	na	3909	4188	868	947	1097	1344	1341	1326	1165	1189	na	na	na	na	na	na	na	na	na
L156T	na	na	na	na	na	na	na	na	na	na	1296	854	466	208	28	209	487	255	220	281	na	na	na	na	na	na	na	na	na	na	1085	1280	257	228	288	309	283	275	217	182	na	na	na	na	na	na	na	na	na
L156V	na	na	na	na	na	na	na	na	na	na	699	495	364	104	27	818	280	216	112	185	na	na	na	na	na	na	na	na	na	na	565	932	144	135	182	226	212	247	201	132	na	na	na	na	na	na	na	na	na
L156W	na	na	na	na	na	na	na	na	na	na	1275	1317	679	303	57	422	351	638	659	696	na	na	na	na	na	na	na	na	na	na	9	1853	494	529	528	644	693	670	581	609	na	na	na	na	na	na	na	na	na
L156Y	na	na	na	na	na	na	na	na	na	na	949	796	503	229	28	302	385	578	658	783	na	na	na	na	na	na	na	na	na	na	995	1321	296	284	373	471	537	572	652	609	na	na	na	na	na	na	na	na	na
L24*	403	na	61	7	na	na	na	19	na	na	na	na	na	na	na	na	na	na	na	na	631	99	23	20	32	na	34	11	na	na	na	na	na	na	na	na	na	na	na	na	158	41	9	27	11	na	8	8	na
L24A	9	na	1374	655	887	1032	1098	1344	1312	11143	na	na	na	na	na	na	na	na	na	na	2211	2562	1017	1033	1603	1600	2044	1200	1836	2773	na	na	na	na	na	na	na	na	na	na	6	2556	819	767	1153	986	1186	1248	1343
L24C	850	na	466	245	365	301	362	356	244	1908	na	na	na	na	na	na	na	na	na	na	986	1020	373	326	515	488	483	344	263	372	na	na	na	na	na	na	na	na	na	na	683	1117	391	304	587	239	508	385	325
L24D	571	na	689	283	306	358	335	282	291	2964	na	na	na	na	na	na	na	na	na	na	959	1027	386	361	554	515	605	322	264	507	na	na	na	na	na	na	na	na	na	na	487	917	341	316	346	439	503	425	349
L24E	7	na	2915	1497	1911	1985	2519	2484	2254	18893	na	na	na	na	na	na	na	na	na	na	4945	5486	2020	2215	3067	3039	3755	2103	3670	3287	na	na	na	na	na	na	na	na	na	na	9	5538	1723	1671	2774	2415	2346	2335	2318
L24F	849	na	1247	483	582	404	540	582	367	3933	na	na	na	na	na	na	na	na	na	na	1378	1771	699	548	845	846	692	540	720	819	na	na	na	na	na	na	na	na	na	na	1005	1586	482	425	767	598	650	549	543
L24G	53	na	9426	4001	5163	5643	6143	7621	8587	65465	na	na	na	na	na	na	na	na	na	na	12034	14430	6199	6423	9106	9477	12125	7516	12731	14632	na	na	na	na	na	na	na	na	na	na	40	14322	4626	4528	6344	6226	6969	7449	8221
L24H	454	na	429	26	69	280	na	70	na	na	na	na	na	na	na	na	na	na	na	na	567	513	133	116	175	204	146	31	38	na	na	na	na	na	na	na	na	na	na	na	296	456	189	83	108	127	64	37	75
L24I	612	na	602	199	335	576	522	616	666	8378	na	na	na	na	na	na	na	na	na	na	947	1297	433	396	566	808	1218	635	733	1261	na	na	na	na	na	na	na	na	na	na	521	1200	317	294	432	468	562	586	699
L24K	3749	na	4006	749	806	426	701	621	229	1226	na	na	na	na	na	na	na	na	na	na	5659	3517	1568	1454	1384	946	819	406	355	281	na	na	na	na	na	na	na	na	na	na	4715	3686	1496	1180	1391	1077	1141	764	468
L24M	167	na	17	12	32	18	8	105	10	na	na	na	na	na	na	na	na	na	na	na	26	71	na	na	na	16	25	na	31	na	na	na	na	na	na	na	na	na	na	na	68	64	na	15	7	11	11	na	8
L24N	871	na	842	448	621	616	639	689	551	5066	na	na	na	na	na	na	na	na	na	na	1283	1419	655	698	998	831	1002	549	792	793	na	na	na	na	na	na	na	na	na	na	5	1687	520	471	769	726	663	763	688
L24P	126	na	174	na	na	na	na	na	na	na	na	na	na	na	na	na	na	na	na	na	186	33	10	na	na	na	na	na	na	na	na	na	na	na	na	na	na	na	na	na	128	23	11	na	na	na	na	na	na
L24Q	na	na	na	na	6	na	47	na	na	na	na	na	na	na	na	na	na	na	na	na	na	9	na	na	na	na	na	na	74	na	na	na	na	na	na	na	na	na	na	na	na	na	87	na	na	na	na	na	na
L24R	2107	na	925	117	89	45	48	26	21	79	na	na	na	na	na	na	na	na	na	na	3196	672	191	150	120	75	62	26	25	73	na	na	na	na	na	na	na	na	na	na	2324	416	198	183	88	128	27	48	12
L24S	1803	na	1450	630	754	691	883	651	628	4473	na	na	na	na	na	na	na	na	na	na	2410	2277	959	1084	1276	1252	1176	681	704	982	na	na	na	na	na	na	na	na	na	na	1703	2309	709	690	1136	835	1090	823	791
L24T	1721	19	1374	743	902	819	1083	1138	1127	7922	na	na	na	na	na	na	na	na	na	na	2052	2464	1035	1072	1734	1556	1713	1032	1735	1632	na	na	na	na	na	na	na	na	na	na	1613	2203	677	647	1211	739	1057	1038	1030
L24V	1314	na	1303	265	345	245	1057	1637	1431	17322	na	na	na	na	na	na	na	na	na	na	1964	2934	364	419	769	993	2354	1128	2517	2899	na	na	na	na	na	na	na	na	na	na	1561	2657	225	238	365	487	503	933	1463
L24W	1869	na	2121	451	456	368	224	184	272	1013	na	na	na	na	na	na	na	na	na	na	2519	1568	720	785	792	653	698	359	226	259	na	na	na	na	na	na	na	na	na	na	2017	1750	643	595	679	590	698	551	371
L24Y	174	na	910	160	184	256	117	195	93	438	na	na	na	na	na	na	na	na	na	na	736	730	289	291	326	266	140	140	132	146	na	na	na	na	na	na	na	na	na	na	701	802	293	243	317	350	230	175	142
L28*	514	na	78	6	6	na	29	na	5	138	na	na	na	na	na	na	na	na	na	na	753	85	35	27	34	19	39	14	na	34	na	na	na	na	na	na	na	na	na	na	195	67	28	18	11	25	25	15	7
L28A	2698	na	3814	734	820	288	455	452	890	2387	na	na	na	na	na	na	na	na	na	na	4692	3018	1388	1308	1308	1028	1007	495	521	512	na	na	na	na	na	na	na	na	na	na	7	3545	1344	1191	1317	1505	1162	893	599
L28C	259	na	502	99	135	29	118	na	22	354	na	na	na	na	na	na	na	na	na	na	770	540	193	165	269	162	145	87	81	43	na	na	na	na	na	na	na	na	na	na	568	554	191	182	146	194	165	166	81
L28D	836	na	353	67	75	44	29	na	6	157	na	na	na	na	na	na	na	na	na	na	912	403	148	141	108	82	30	37	34	55	na	na	na	na	na	na	na	na	na	na	624	320	299	120	100	127	81	50	29
L28E	2731	na	1971	337	332	567	110	133	24	325	na	na	na	na	na	na	na	na	na	na	4382	1794	737	691	631	334	246	149	106	116	na	na	na	na	na	na	na	na	na	na	4155	1895	599	625	550	356	490	311	186
L28F	42	na	12	na	na	18	na	7	na	na	na	na	na	na	na	na	na	na	na	na	na	228	na	na	na	na	15	na	na	na	na	na	na	na	na	na	na	na	na	na	na	202	na	na	na	na	na	na	na
L28G	5046	11	7123	1749	1849	1557	1028	820	889	4893	na	na	na	na	na	na	na	na	na	na	8937	6332	2846	2787	3065	2389	2233	1121	834	1180	na	na	na	na	na	na	na	na	na	na	9	7200	2419	2527	3045	2775	2438	2110	1511
L28I	5	na	8	na	na	6	na	na	na	na	na	na	na	na	na	na	na	na	na	na	na	na	na	na	na	na	na	na	na	na	na	na	na	na	na	na	na	na	na	na	12	14	na	na	na	na	na	7	8
L28K	561	na	156	43	26	60	na	34	6	90	na	na	na	na	na	na	na	na	na	na	2078	227	182	104	75	33	95	20	26	na	na	na	na	na	na	na	na	na	na	na	1410	230	73	73	52	34	42	18	22
L28M	3720	na	2808	1172	1370	917	1286	973	1074	5589	na	na	na	na	na	na	na	na	na	na	4089	3819	1669	1662	2161	2233	2103	1071	1377	1336	na	na	na	na	na	na	na	na	na	na	2484	4085	1296	1262	1685	1452	1533	1307	1162
L28N	1975	na	1711	387	430	311	237	126	162	938	na	na	na	na	na	na	na	na	na	na	2374	1525	865	609	768	519	339	229	275	347	na	na	na	na	na	na	na	na	na	na	1799	1910	751	627	862	440	739	516	374
L28P	1064	na	353	57	43	31	17	29	na	115	na	na	na	na	na	na	na	na	na	na	1325	7	124	158	102	44	40	22	60	26	na	na	na	na	na	na	na	na	na	na	8	295	139	139	89	58	41	26	27
L28Q	1177	na	556	124	81	39	34	na	10	178	na	na	na	na	na	na	na	na	na	na	2178	737	277	248	230	115	150	56	71	129	na	na	na	na	na	na	na	na	na	na	1800	798	264	231	276	326	160	143	55
L28R	1619	na	1241	171	100	119	42	78	23	151	na	na	na	na	na	na	na	na	na	na	3744	878	279	258	210	151	194	53	56	61	na	na	na	na	na	na	na	na	na	na	3053	784	521	229	212	130	169	104	79
L28S	1593	na	2272	482	595	276	399	206	210	1641	na	na	na	na	na	na	na	na	na	na	3352	2036	801	800	1011	741	783	368	521	426	na	na	na	na	na	na	na	na	na	na	2897	2478	821	835	874	792	710	605	487
L28T	1966	na	3011	701	742	941	496	343	265	1916	na	na	na	na	na	na	na	na	na	na	4360	2766	1270	1211	1316	932	1479	467	474	488	na	na	na	na	na	na	na	na	na	na	3276	3115	1158	1141	1304	1267	990	768	580
L28V	3595	na	4334	943	1118	817	703	478	310	2049	na	na	na	na	na	na	na	na	na	na	5541	3424	1436	1791	1486	1108	1744	497	626	432	na	na	na	na	na	na	na	na	na	na	8	3755	1451	1245	1485	1375	1064	910	719
L28W	2719	na	1506	337	347	149	104	182	138	772	na	na	na	na	na	na	na	na	na	na	2501	1509	638	612	720	504	362	203	185	140	na	na	na	na	na	na	na	na	na	na	2016	1748	625	604	618	1128	545	426	277
L28Y	753	na	1079	391	475	263	751	557	609	4943	na	na	na	na	na	na	na	na	na	na	1268	1377	557	648	876	830	887	602	941	997	na	na	na	na	na	na	na	na	na	na	821	1467	446	447	628	512	777	819	748
L36*	266	6	33	28	11	7	na	na	18	98	na	na	na	na	na	na	na	na	na	na	772	32	38	73	36	23	36	26	24	17	na	na	na	na	na	na	na	na	na	na	13	66	36	14	18	17	20	35	22
L36A	3063	na	3916	1202	1378	1212	1107	735	899	5479	na	na	na	na	na	na	na	na	na	na	5185	4393	1837	2028	2279	1893	1862	1005	1034	915	na	na	na	na	na	na	na	na	na	na	7	4237	1631	1515	1987	1803	1681	1355	1116
L36C	1297	na	2030	685	774	525	745	656	339	2441	na	na	na	na	na	na	na	na	na	na	2443	2057	935	1035	1199	1064	1423	537	507	538	na	na	na	na	na	na	na	na	na	na	1916	2091	969	687	980	918	840	681	564
L36D	1535	na	2268	812	1093	1360	859	587	875	10772	na	na	na	na	na	na	na	na	na	na	2359	2753	1163	1253	1761	1506	1909	826	1072	1205	na	na	na	na	na	na	na	na	na	na	9	2674	934	859	1236	1339	1573	1311	1072
L36E	18	na	3878	1799	2174	1784	2204	2314	1754	14891	na	na	na	na	na	na	na	na	na	na	5297	5499	2511	2687	3467	3402	3899	2123	2620	2792	na	na	na	na	na	na	na	na	na	na	15	5201	1987	1756	3028	2367	2601	2798	2260
L36F	1756	na	2068	525	716	1142	1588	1392	1736	13039	na	na	na	na	na	na	na	na	na	na	3220	4337	856	1027	1840	1955	1583	1434	2164	2662	na	na	na	na	na	na	na	na	na	na	2323	4149	601	476	997	1432	1428	1262	1458
L36G	38	na	10293	5106	6655	6124	6958	6860	5960	47973	na	na	na	na	na	na	na	na	na	na	14907	21	6950	7522	10513	9880	13449	6854	9074	9744	na	na	na	na	na	na	na	na	na	na	51	15	5678	5286	7795	7219	8218	7636	7273
L36H	10	na	1336	623	791	859	783	1012	1150	6388	na	na	na	na	na	na	na	na	na	na	1777	1840	818	864	1299	1231	1301	940	1064	1167	na	na	na	na	na	na	na	na	na	na	1214	2021	646	643	1026	950	1014	1029	957
L36I	1347	na	1275	602	865	718	786	631	715	4941	na	na	na	na	na	na	na	na	na	na	1890	2039	907	905	1296	1220	1583	860	1080	1086	na	na	na	na	na	na	na	na	na	na	7	1917	594	626	919	963	993	873	843
L36K	13	na	3207	1574	1953	1857	2706	2124	2515	19191	na	na	na	na	na	na	na	na	na	na	4633	4913	2151	2324	3292	3058	4786	2431	3368	4383	na	na	na	na	na	na	na	na	na	na	24	4710	2000	1645	2564	2643	2611	2664	2835
L36M	6	na	2409	1136	1493	1573	1342	2146	1257	16508	na	na	na	na	na	na	na	na	na	na	3333	3624	1683	1761	2400	2273	2142	1475	1976	2188	na	na	na	na	na	na	na	na	na	na	9	3647	1107	1134	1788	1532	1632	1591	1467
L36N	9	na	1144	565	775	573	830	1094	838	7081	na	na	na	na	na	na	na	na	na	na	1650	1798	876	825	1235	1234	1594	921	1228	1357	na	na	na	na	na	na	na	na	na	na	6	1729	625	478	855	910	937	786	909
L36P	3404	na	2143	190	190	100	101	47	20	494	na	na	na	na	na	na	na	na	na	na	3760	1678	617	685	433	259	398	138	97	101	na	na	na	na	na	na	na	na	na	na	3274	1601	738	499	486	279	348	197	156
L36Q	7	na	2292	992	1453	1752	1934	1898	2135	13909	na	na	na	na	na	na	na	na	na	na	3062	3590	1657	1801	2420	2196	3294	1860	3204	3016	na	na	na	na	na	na	na	na	na	na	13	3429	1158	1111	2042	1696	2040	2044	1924
L36R	21	na	9297	3772	4753	4837	5576	6115	5962	45555	na	na	na	na	na	na	na	na	na	na	11789	12603	5573	5998	7934	7793	9376	5488	7997	9031	na	na	na	na	na	na	na	na	na	na	44	12115	4337	4359	6249	6365	6503	6666	6356
L36S	20	na	5072	2119	2806	2351	3166	3584	3249	24467	na	na	na	na	na	na	na	na	na	na	6620	7	3273	3422	4910	4733	5511	3170	4060	4691	na	na	na	na	na	na	na	na	na	na	38	9	2527	2592	3508	3621	3730	3734	3517
L36T	13	na	2552	1244	1612	1489	1606	1719	1410	13062	na	na	na	na	na	na	na	na	na	na	3987	4119	1841	1921	2449	2380	2581	1592	2246	2043	na	na	na	na	na	na	na	na	na	na	6	3959	1328	1375	2283	2042	1966	1811	1681
L36V	10	5	5784	2464	2737	2115	2070	1786	1589	9642	na	na	na	na	na	na	na	na	na	na	7698	6854	3162	3476	4397	3562	3988	1851	1967	2064	na	na	na	na	na	na	na	na	na	na	16	7288	3399	2470	3184	3166	3099	2461	2085
L36W	12	na	4343	2293	2841	2487	2840	2427	2485	17940	na	na	na	na	na	na	na	na	na	na	6782	7104	3323	3515	4502	4439	5091	2710	3583	4034	na	na	na	na	na	na	na	na	na	na	29	6507	2524	2170	3286	3318	3327	2977	2866
L36Y	1678	na	1406	786	1032	857	1155	1219	937	6656	na	na	na	na	na	na	na	na	na	na	2386	2539	1235	1185	1620	1471	1704	1084	1643	1358	na	na	na	na	na	na	na	na	na	na	7	2336	763	672	1172	1044	1252	1084	996
L4*	275	na	54	na	na	na	17	na	5	na	na	na	na	na	na	na	na	na	na	na	392	77	19	11	19	na	48	na	na	na	na	na	na	na	na	na	na	na	na	na	84	29	12	6	na	na	16	na	na
L4A	5	na	2563	607	663	453	407	374	235	1323	na	na	na	na	na	na	na	na	na	na	3821	2001	1071	939	1081	860	1392	388	444	362	na	na	na	na	na	na	na	na	na	na	3125	2497	896	886	992	878	796	661	449
L4C	1661	na	2201	518	588	187	272	427	273	1578	na	na	na	na	na	na	na	na	na	na	2571	1724	786	729	951	693	602	345	288	261	na	na	na	na	na	na	na	na	na	na	1786	1758	695	608	833	532	567	531	384
L4D	624	na	75	8	7	na	na	na	na	na	na	na	na	na	na	na	na	na	na	na	366	52	17	16	15	12	na	na	na	na	na	na	na	na	na	na	na	na	na	na	92	25	6	20	9	na	9	na	na
L4E	1038	na	369	53	56	15	203	26	10	173	na	na	na	na	na	na	na	na	na	na	1306	347	128	100	102	38	62	46	na	49	na	na	na	na	na	na	na	na	na	na	1129	232	126	100	117	84	78	62	44
L4F	22	na	6173	1872	2174	2274	2596	3480	3705	28770	na	na	na	na	na	na	na	na	na	na	5072	8081	2771	3119	4011	3808	5758	3048	6000	6610	na	na	na	na	na	na	na	na	na	na	17	6343	2087	1905	2262	2859	2795	2839	2931
L4G	1641	na	699	51	75	15	27	31	31	425	na	na	na	na	na	na	na	na	na	na	4053	425	180	312	120	83	65	45	80	99	na	na	na	na	na	na	na	na	na	na	1908	365	136	160	110	58	53	70	52
L4H	1401	na	321	87	138	141	68	87	44	105	na	na	na	na	na	na	na	na	na	na	1905	475	191	196	173	169	56	58	39	81	na	na	na	na	na	na	na	na	na	na	1594	459	309	264	241	141	169	129	89
L4I	7	na	1485	734	902	1000	1264	1783	1752	12949	na	na	na	na	na	na	na	na	na	na	2256	3518	993	1202	1512	1738	2555	1319	2693	2554	na	na	na	na	na	na	na	na	na	na	1639	2581	1010	823	1109	1452	1526	1603	1727
L4K	915	na	145	11	13	na	na	na	9	130	na	na	na	na	na	na	na	na	na	na	1254	156	48	47	40	32	36	8	38	38	na	na	na	na	na	na	na	na	na	na	275	109	50	20	12	17	47	18	36
L4M	38	na	16	na	na	5	17	16	5	na	na	na	na	na	na	na	na	na	na	na	na	258	na	na	na	na	10	na	na	na	na	na	na	na	na	na	na	na	na	na	na	7	9	6	na	na	na	na	na
L4N	1811	na	313	119	99	25	10	18	7	168	na	na	na	na	na	na	na	na	na	na	1602	475	183	117	140	106	44	63	113	54	na	na	na	na	na	na	na	na	na	na	1262	337	163	158	119	77	210	65	26
L4P	1272	na	208	35	26	na	26	66	na	124	na	na	na	na	na	na	na	na	na	na	2272	214	106	40	81	59	82	20	20	43	na	na	na	na	na	na	na	na	na	na	1221	178	89	72	74	56	60	41	35
L4Q	8	na	na	na	na	na	18	na	na	na	na	na	na	na	na	na	na	na	na	na	441	7	na	na	na	na	na	na	na	na	na	na	na	na	na	na	na	na	na	na	642	13	na	na	na	24	na	na	na
L4R	794	na	247	29	26	na	na	15	46	180	na	na	na	na	na	na	na	na	na	na	1351	214	53	73	78	47	48	42	82	57	na	na	na	na	na	na	na	na	na	na	416	109	34	36	35	11	49	28	34
L4S	3078	na	956	195	191	131	38	75	32	268	na	na	na	na	na	na	na	na	na	na	3991	981	414	352	299	185	320	76	120	143	na	na	na	na	na	na	na	na	na	na	3629	1068	655	641	432	258	351	145	108
L4T	3396	na	1672	343	382	291	143	128	42	704	na	na	na	na	na	na	na	na	na	na	3401	1540	783	558	620	527	269	233	184	190	na	na	na	na	na	na	na	na	na	na	12	1762	775	614	673	685	568	404	268
L4V	10	na	4279	1444	1568	1329	1448	1643	1215	9244	na	na	na	na	na	na	na	na	na	na	6618	4722	1555	1826	2339	2045	3251	1452	1592	1913	na	na	na	na	na	na	na	na	na	na	12	5122	1778	1448	1927	1674	1785	1670	1387
L4W	335	na	57	7	7	28	7	29	na	na	na	na	na	na	na	na	na	na	na	na	516	54	22	22	37	na	30	na	17	na	na	na	na	na	na	na	na	na	na	na	147	47	16	16	14	na	15	na	8
L4Y	946	na	330	78	72	54	19	11	na	65	na	na	na	na	na	na	na	na	na	na	1107	350	172	103	111	156	129	36	41	na	na	na	na	na	na	na	na	na	na	na	911	343	180	176	134	87	114	43	32
L54*	na	na	na	na	na	na	na	na	na	na	na	na	na	na	na	na	na	na	na	na	26	na	8	na	na	na	12	na	na	na	na	na	na	na	na	na	na	na	na	na	22	na	na	na	na	na	na	na	na
L54A	na	na	na	na	na	na	na	na	na	na	192	702	200	157	17	135	800	52	58	60	1959	1286	1019	751	624	453	294	194	256	147	na	na	na	na	na	na	na	na	na	na	1768	1128	538	505	391	429	334	243	138
L54C	na	na	na	na	na	na	na	na	na	na	51	391	139	464	14	115	47	106	24	96	504	584	335	333	336	239	493	193	238	206	na	na	na	na	na	na	na	na	na	na	654	525	289	213	227	343	251	214	132
L54D	na	na	na	na	na	na	na	na	na	na	28	45	na	na	na	5	na	na	13	na	582	84	34	29	20	8	133	15	10	23	na	na	na	na	na	na	na	na	na	na	171	38	22	7	14	na	8	na	8
L54E	na	na	na	na	na	na	na	na	na	na	43	37	na	na	na	na	na	na	na	na	607	62	na	na	na	na	na	na	na	na	na	na	na	na	na	na	na	na	na	na	263	43	na	11	na	na	na	na	na
L54F	na	na	na	na	na	na	na	na	na	na	39	228	70	85	21	42	83	70	83	70	312	359	117	89	90	98	131	111	197	126	na	na	na	na	na	na	na	na	na	na	210	241	97	97	107	101	132	104	100
L54G	na	na	na	na	na	na	na	na	na	na	170	248	48	38	3	55	25	18	34	13	2059	349	232	194	159	122	45	85	na	14	na	na	na	na	na	na	na	na	na	na	1283	309	140	128	78	118	77	52	40
L54H	na	na	na	na	na	na	na	na	na	na	62	71	34	18	1	na	na	na	na	12	586	110	80	49	47	39	16	21	na	na	na	na	na	na	na	na	na	na	na	na	291	95	54	51	21	15	22	26	13
L54I	na	na	na	na	na	na	na	na	na	na	117	904	290	249	27	130	203	126	70	212	1718	1382	900	716	722	658	998	499	586	368	na	na	na	na	na	na	na	na	na	na	1110	1275	636	490	723	449	655	602	435
L54K	na	na	na	na	na	na	na	na	na	na	79	135	43	19	na	14	na	17	na	na	1158	173	139	72	57	34	38	47	49	na	na	na	na	na	na	na	na	na	na	na	675	124	79	51	36	79	16	36	24
L54M	na	na	na	na	na	na	na	na	na	na	34	11	12	17	8	na	16	na	20	20	232	153	na	na	na	na	110	na	na	11	na	na	na	na	na	na	na	na	na	na	290	110	9	na	na	na	na	na	9
L54N	na	na	na	na	na	na	na	na	na	na	94	184	46	30	4	45	20	8	7	12	1553	293	226	225	157	86	59	56	36	28	na	na	na	na	na	na	na	na	na	na	825	274	136	122	132	127	85	57	33
L54P	na	na	na	na	na	na	na	na	na	na	296	1159	413	275	24	179	270	51	116	87	3088	1614	1336	889	890	586	604	396	190	279	na	na	na	na	na	na	na	na	na	na	2514	1481	804	613	592	410	497	353	242
L54Q	na	na	na	na	na	na	na	na	na	na	51	190	55	40	1	8	41	13	na	na	763	281	200	116	116	79	104	40	75	20	na	na	na	na	na	na	na	na	na	na	493	229	94	113	84	120	74	41	44
L54R	na	na	na	na	na	na	na	na	na	na	98	199	74	54	2	12	23	23	13	na	1245	261	190	108	112	49	101	67	43	47	na	na	na	na	na	na	na	na	na	na	858	209	88	109	49	19	44	51	22
L54S	na	na	na	na	na	na	na	na	na	na	114	285	70	54	7	70	na	25	33	na	1458	526	429	329	275	119	395	92	58	41	na	na	na	na	na	na	na	na	na	na	1143	441	255	191	149	105	168	100	53
L54T	na	na	na	na	na	na	na	na	na	na	285	1034	393	256	39	130	283	110	71	95	4130	2024	1654	1155	1081	860	753	438	313	291	na	na	na	na	na	na	na	na	na	na	2721	1897	1170	820	895	947	609	437	337
L54V	na	na	na	na	na	na	na	na	na	na	121	909	295	266	40	255	127	183	110	159	1778	1091	736	491	651	597	725	438	630	446	na	na	na	na	na	na	na	na	na	na	1075	1093	504	436	663	540	573	447	348
L54W	na	na	na	na	na	na	na	na	na	na	7	8	12	5	5	4	na	5	8	na	na	na	na	na	na	na	na	na	na	na	na	na	na	na	na	na	na	na	na	na	19	na	na	na	na	na	na	na	na
L54Y	na	na	na	na	na	na	na	na	na	na	31	78	11	8	2	na	na	28	6	na	500	79	73	51	42	33	15	22	24	na	na	na	na	na	na	na	na	na	na	na	308	79	47	35	40	73	26	13	na
L62*	na	na	na	na	na	na	na	na	na	na	32	28	32	na	1	na	na	na	11	na	242	44	17	41	14	11	na	6	10	9	na	na	na	na	na	na	na	na	na	na	156	28	11	11	13	na	12	10	na
L62A	na	na	na	na	na	na	na	na	na	na	219	1521	526	320	52	283	487	350	379	419	2394	1877	1090	800	902	738	1125	574	356	636	na	na	na	na	na	na	na	na	na	na	1708	1754	625	638	745	557	729	537	399
L62C	na	na	na	na	na	na	na	na	na	na	97	1261	425	360	53	556	464	674	703	787	1232	1283	634	582	654	674	1083	649	986	1175	na	na	na	na	na	na	na	na	na	na	922	1248	346	451	738	679	720	672	644
L62D	na	na	na	na	na	na	na	na	na	na	13	34	18	14	na	14	na	na	na	na	187	40	38	10	32	13	42	14	12	na	na	na	na	na	na	na	na	na	na	na	100	24	11	12	11	16	8	na	na
L62E	na	na	na	na	na	na	na	na	na	na	41	57	19	4	4	6	na	na	na	10	391	109	63	29	15	18	44	29	16	15	na	na	na	na	na	na	na	na	na	na	219	67	41	33	64	9	19	16	8
L62F	na	na	na	na	na	na	na	na	na	na	29	692	12	21	7	34	44	13	60	na	129	523	17	30	13	na	18	17	na	18	na	na	na	na	na	na	na	na	na	na	198	310	9	na	32	8	9	19	32
L62G	na	na	na	na	na	na	na	na	na	na	78	119	29	45	5	53	33	27	130	43	1199	168	119	73	90	72	75	69	45	na	na	na	na	na	na	na	na	na	na	na	565	119	78	42	56	67	40	49	26
L62H	na	na	na	na	na	na	na	na	na	na	50	na	na	5	1	na	na	na	na	na	184	na	na	na	na	na	na	na	na	na	na	na	na	na	na	na	na	na	na	na	177	na	na	na	na	na	na	na	na
L62I	na	na	na	na	na	na	na	na	na	na	18	86	60	110	18	7	10	59	82	190	na	na	na	na	na	na	na	na	na	na	na	na	na	na	na	na	na	na	na	na	na	na	na	na	na	na	na	na	na
L62K	na	na	na	na	na	na	na	na	na	na	67	153	51	27	2	12	7	17	110	8	903	283	282	170	146	95	87	42	62	47	na	na	na	na	na	na	na	na	na	na	780	211	186	137	111	122	79	51	34
L62M	na	na	na	na	na	na	na	na	na	na	86	1400	406	449	60	520	540	629	385	693	1436	1385	820	719	746	678	825	671	1029	1066	na	na	na	na	na	na	na	na	na	na	972	1300	536	476	721	800	730	804	700
L62N	na	na	na	na	na	na	na	na	na	na	51	89	38	9	6	30	90	27	12	11	677	115	85	73	62	26	49	38	12	na	na	na	na	na	na	na	na	na	na	na	423	89	50	49	27	41	40	27	28
L62P	na	na	na	na	na	na	na	na	na	na	35	51	13	11	2	6	na	7	na	24	302	70	36	38	27	15	47	17	na	12	na	na	na	na	na	na	na	na	na	na	189	58	29	15	17	na	26	17	na
L62Q	na	na	na	na	na	na	na	na	na	na	114	389	161	83	8	62	19	40	62	69	977	580	572	379	361	265	281	140	112	139	na	na	na	na	na	na	na	na	na	na	904	624	328	223	310	255	210	207	106
L62R	na	na	na	na	na	na	na	na	na	na	39	76	33	23	6	45	na	12	30	32	421	111	53	68	39	21	22	23	19	42	na	na	na	na	na	na	na	na	na	na	411	74	37	23	15	27	18	18	na
L62S	na	na	na	na	na	na	na	na	na	na	78	189	73	50	2	39	47	33	207	50	1389	326	281	267	158	99	104	64	86	87	na	na	na	na	na	na	na	na	na	na	1013	275	198	133	146	35	121	105	13
L62T	na	na	na	na	na	na	na	na	na	na	208	2027	795	630	76	555	617	494	495	632	2546	2268	1460	1212	1388	1037	1719	840	1064	997	na	na	na	na	na	na	na	na	na	na	1699	2310	822	754	1216	926	930	926	684
L62V	na	na	na	na	na	na	na	na	na	na	257	3992	1146	1254	221	2433	1767	2139	2914	2804	3071	3430	1669	1607	1819	1857	2187	1872	2917	3895	na	na	na	na	na	na	na	na	na	na	2147	2983	1181	1074	1706	1839	1782	2069	2197
L62W	na	na	na	na	na	na	na	na	na	na	180	1832	673	650	51	453	579	319	321	372	2642	2008	1152	1102	1017	1007	1588	627	854	614	na	na	na	na	na	na	na	na	na	na	1549	1976	757	654	880	761	727	688	460
L62Y	na	na	na	na	na	na	na	na	na	na	115	879	365	285	23	147	265	278	91	172	1189	1041	668	545	617	437	506	342	414	346	na	na	na	na	na	na	na	na	na	na	732	934	431	355	494	379	423	267	249
L8*	946	na	186	21	34	25	54	na	8	146	na	na	na	na	na	na	na	na	na	na	2045	251	92	93	81	51	54	13	15	9	na	na	na	na	na	na	na	na	na	na	748	202	55	83	64	110	36	41	24
L8A	4	na	2819	1215	1604	1308	1176	1344	1005	8242	na	na	na	na	na	na	na	na	na	na	4434	4013	1662	1767	2331	2087	3201	1372	1603	1329	na	na	na	na	na	na	na	na	na	na	6	3919	1630	1264	1738	1688	1619	1351	1140
L8C	40	na	53	25	43	50	16	16	28	457	na	na	na	na	na	na	na	na	na	na	113	133	48	54	70	67	82	45	47	na	na	na	na	na	na	na	na	na	na	na	160	103	35	30	47	15	40	29	20
L8D	461	na	68	13	21	na	na	21	14	43	na	na	na	na	na	na	na	na	na	na	445	77	26	12	22	10	na	7	10	na	na	na	na	na	na	na	na	na	na	na	286	74	6	26	na	35	11	7	na
L8E	19	na	12763	4585	5342	4831	3622	3196	3331	23657	na	na	na	na	na	na	na	na	na	na	18326	12973	6412	6380	7652	6072	5721	3396	4530	3956	na	na	na	na	na	na	na	na	na	na	36	15011	5949	5323	7635	6906	6406	5228	4325
L8F	na	na	na	5	7	na	6	8	10	na	na	na	na	na	na	na	na	na	na	na	26	9	9	na	9	na	na	na	na	na	na	na	na	na	na	na	na	na	na	na	na	18	na	11	na	20	na	na	na
L8G	12668	5	6302	1190	943	1070	669	457	306	2164	na	na	na	na	na	na	na	na	na	na	16431	7	2462	2098	2071	1245	2191	575	878	556	na	na	na	na	na	na	na	na	na	na	6	5865	3767	2624	2224	2297	2000	1289	855
L8H	88	na	346	94	121	92	102	34	30	447	na	na	na	na	na	na	na	na	na	na	282	405	151	166	158	160	304	85	91	71	na	na	na	na	na	na	na	na	na	na	298	484	145	131	166	150	159	139	128
L8I	930	na	577	130	168	118	27	121	15	244	na	na	na	na	na	na	na	na	na	na	1070	541	208	249	239	100	258	55	na	87	na	na	na	na	na	na	na	na	na	na	1124	639	244	238	305	234	207	128	81
L8K	56	16	21997	9899	12843	11316	10645	11207	11449	81919	na	na	na	na	na	na	na	na	na	na	30617	9	14484	14784	20157	18762	22601	12200	15963	16091	na	na	na	na	na	na	na	na	na	na	56	32350	10154	9818	14665	13088	13420	11893	10974
L8M	21	21	6511	3134	3669	3700	4060	5224	3820	26830	na	na	na	na	na	na	na	na	na	na	9024	10030	3987	4444	6128	5648	8299	4059	5281	5978	na	na	na	na	na	na	na	na	na	na	19	9604	3070	3102	4434	3975	4394	4227	4011
L8N	544	na	520	132	188	211	158	83	31	217	na	na	na	na	na	na	na	na	na	na	869	669	300	240	297	221	222	98	76	94	na	na	na	na	na	na	na	na	na	na	873	945	303	282	324	297	238	150	129
L8P	1693	na	781	167	137	41	88	20	69	305	na	na	na	na	na	na	na	na	na	na	1639	766	340	275	255	168	143	95	29	57	na	na	na	na	na	na	na	na	na	na	1229	714	318	224	294	287	221	161	125
L8Q	8	na	4302	1589	1874	1228	1171	1242	1022	6274	na	na	na	na	na	na	na	na	na	na	5994	5168	2285	2165	2549	2093	2206	1246	1449	1312	na	na	na	na	na	na	na	na	na	na	6	5166	1772	1532	2060	1943	1725	1409	1257
L8R	18	8	24928	7888	8885	6064	5447	5294	4545	44816	na	na	na	na	na	na	na	na	na	na	34352	17	12409	11267	14255	11380	11574	6201	6543	7608	na	na	na	na	na	na	na	na	na	na	70	14	10332	9200	11957	10450	10519	8407	7023
L8S	2024	na	2196	782	1063	615	610	563	509	3717	na	na	na	na	na	na	na	na	na	na	3463	7	1334	1364	1612	1224	1156	726	496	734	na	na	na	na	na	na	na	na	na	na	2882	3138	911	882	1326	1134	1070	943	715
L8T	13	na	6281	3044	3799	2884	3804	4010	3931	29647	na	na	na	na	na	na	na	na	na	na	9088	9813	4225	4726	6011	5651	6915	4118	5547	5877	na	na	na	na	na	na	na	na	na	na	15	9495	2982	2800	4063	3718	4204	4141	4246
L8V	27	na	6015	2284	2785	3024	2268	2165	1720	12569	na	na	na	na	na	na	na	na	na	na	9307	7473	3202	3447	4324	3461	4297	2171	2216	2483	na	na	na	na	na	na	na	na	na	na	13	7998	2679	2374	3595	3308	3304	2667	2213
L8W	6	na	3732	1370	1683	1288	1445	1334	1213	8416	na	na	na	na	na	na	na	na	na	na	4958	4868	2126	2243	3059	2490	2804	1484	1538	1872	na	na	na	na	na	na	na	na	na	na	8	4981	1476	1562	2076	1795	1795	1646	1369
L8Y	372	na	346	91	108	45	49	134	36	238	na	na	na	na	na	na	na	na	na	na	288	238	98	122	151	107	133	65	93	63	na	na	na	na	na	na	na	na	na	na	152	249	93	108	119	120	98	75	59
M16*	1298	na	215	32	30	254	8	10	54	246	na	na	na	na	na	na	na	na	na	na	1699	236	123	134	77	79	50	38	87	51	na	na	na	na	na	na	na	na	na	na	579	151	46	53	39	27	73	35	27
M16A	12	11	2753	1354	1886	1754	2085	2256	2503	18287	na	na	na	na	na	na	na	na	na	na	4012	4745	1889	2165	3234	3072	3600	2409	3416	3486	na	na	na	na	na	na	na	na	na	na	5	4712	1346	1429	2353	2896	2269	2295	2408
M16C	1979	9	1995	974	1195	828	1161	1138	1220	8959	na	na	na	na	na	na	na	na	na	na	2515	2843	1244	1150	1880	1657	1814	1385	1757	2081	na	na	na	na	na	na	na	na	na	na	5	2907	878	900	1453	1287	1320	1491	1212
M16D	4	na	2401	706	803	398	669	415	369	3352	na	na	na	na	na	na	na	na	na	na	2771	2690	1086	1350	1400	1143	1291	610	615	694	na	na	na	na	na	na	na	na	na	na	2161	2675	859	810	1076	828	1028	770	605
M16E	15	9	12039	2997	3671	2432	2628	2106	1453	11857	na	na	na	na	na	na	na	na	na	na	11598	10743	4762	4711	5603	4564	4596	2289	2063	2202	na	na	na	na	na	na	na	na	na	na	27	16	3907	3289	4200	3610	3919	2967	2199
M16F	2993	na	2754	477	419	611	184	206	97	656	na	na	na	na	na	na	na	na	na	na	4292	2220	927	862	925	515	370	222	118	193	na	na	na	na	na	na	na	na	na	na	3272	2504	996	925	925	724	648	447	273
M16G	8344	na	8414	1856	2039	1015	1184	955	497	4647	na	na	na	na	na	na	na	na	na	na	9845	6870	3208	2928	3280	2398	2625	1202	1256	848	na	na	na	na	na	na	na	na	na	na	11	7355	2569	2498	2538	2699	2267	1670	1333
M16H	2123	na	1795	459	512	473	414	322	254	1592	na	na	na	na	na	na	na	na	na	na	2382	1729	748	777	884	680	594	328	296	312	na	na	na	na	na	na	na	na	na	na	1936	1913	632	569	851	740	753	524	364
M16I	4	na	1313	na	na	19	na	15	55	na	na	na	na	na	na	na	na	na	na	na	1384	881	na	na	10	na	na	na	na	25	na	na	na	na	na	na	na	na	na	na	1247	1395	7	15	22	16	13	na	na
M16K	5715	na	8109	2204	2233	2182	1807	798	1382	4134	na	na	na	na	na	na	na	na	na	na	10728	9996	2135	2734	4011	3003	3838	1327	1436	560	na	na	na	na	na	na	na	na	na	na	8801	9805	2147	1833	2714	2542	1942	1887	1309
M16L	20	11	8822	1875	2058	2084	2722	1693	2030	20122	na	na	na	na	na	na	na	na	na	na	11337	10899	2025	2154	3591	3350	5112	2043	2085	1905	na	na	na	na	na	na	na	na	na	na	8506	10802	1951	1843	2620	2524	2533	2178	1615
M16N	2266	na	4545	748	836	564	555	226	351	2358	na	na	na	na	na	na	na	na	na	na	3132	2684	1198	1131	1413	1038	1296	536	538	342	na	na	na	na	na	na	na	na	na	na	2471	2864	910	939	1310	1143	981	723	510
M16P	566	na	238	26	15	19	25	na	na	na	na	na	na	na	na	na	na	na	na	na	1060	159	54	30	21	44	na	15	32	na	na	na	na	na	na	na	na	na	na	na	760	94	64	31	22	14	8	13	9
M16Q	24	na	6510	2155	2726	2058	2751	3067	2065	16878	na	na	na	na	na	na	na	na	na	na	7005	7108	3081	3382	4264	3962	4844	2512	2959	3206	na	na	na	na	na	na	na	na	na	na	7	6887	2306	2247	3316	2866	2939	2540	2166
M16R	21	14	12680	5056	6804	6746	8006	7808	7046	60748	na	na	na	na	na	na	na	na	na	na	19026	19889	7219	8330	11312	10360	12508	7815	10073	11241	na	na	na	na	na	na	na	na	na	na	22	18696	5564	5193	8483	8373	7787	7869	7729
M16S	33	na	5561	2275	3173	2966	3549	4048	4348	31565	na	na	na	na	na	na	na	na	na	na	7356	8477	3951	3914	5158	5173	6775	4140	5868	6440	na	na	na	na	na	na	na	na	na	na	10	8009	2715	2524	3560	3303	3903	4034	3951
M16T	1882	na	3433	914	894	860	806	925	1716	6815	na	na	na	na	na	na	na	na	na	na	4156	4276	1037	1435	1963	1676	1885	1061	848	1321	na	na	na	na	na	na	na	na	na	na	18	4286	1089	844	1278	1313	1101	932	777
M16V	8	9	7397	2850	3772	3437	4452	5209	5794	41696	na	na	na	na	na	na	na	na	na	na	10226	12499	3976	4503	6883	6796	9070	5727	7604	8710	na	na	na	na	na	na	na	na	na	na	6	12071	3035	2936	4502	4922	5164	4998	5173
M16W	4	na	3924	1938	2353	2436	2280	2157	1738	13556	na	na	na	na	na	na	na	na	na	na	6472	5891	2452	2716	3585	3264	3814	2289	2600	2973	na	na	na	na	na	na	na	na	na	na	10	5466	1882	1962	2796	2825	2549	2511	2246
M16Y	2105	na	2256	416	335	898	102	185	129	498	na	na	na	na	na	na	na	na	na	na	3137	1727	694	624	785	444	335	199	208	165	na	na	na	na	na	na	na	na	na	na	2245	1929	703	692	802	609	468	388	237
M1I	4	na	na	5	569	na	na	na	na	na	na	na	na	na	na	na	na	na	na	na	325	9	na	na	706	na	na	na	na	42	na	na	na	na	na	na	na	na	na	na	311	na	na	6	171	na	na	na	na
M1L	na	na	na	na	na	na	na	na	na	na	na	na	na	na	na	na	na	na	na	na	na	na	na	na	na	na	na	6	na	na	na	na	na	na	na	na	na	na	na	na	na	na	na	na	na	na	na	na	na
M20*	38	na	83	na	na	17	11	na	na	na	na	na	na	na	na	na	na	na	na	na	458	36	na	na	na	na	na	na	na	na	na	na	na	na	na	na	na	na	na	na	93	17	na	na	na	na	na	na	na
M20A	2663	na	1146	81	65	85	30	na	6	164	na	na	na	na	na	na	na	na	na	na	2619	677	304	180	145	110	99	40	60	14	na	na	na	na	na	na	na	na	na	na	2204	749	317	276	172	127	122	52	47
M20C	797	na	864	182	173	92	105	na	47	301	na	na	na	na	na	na	na	na	na	na	1304	1088	329	280	396	182	141	90	105	26	na	na	na	na	na	na	na	na	na	na	1021	897	300	276	282	316	222	151	111
M20D	291	na	53	7	8	na	na	na	na	na	na	na	na	na	na	na	na	na	na	na	446	33	16	na	22	9	27	6	na	na	na	na	na	na	na	na	na	na	na	na	246	31	29	8	8	13	12	na	na
M20E	1581	na	2136	468	401	252	136	163	124	841	na	na	na	na	na	na	na	na	na	na	2674	1770	712	746	722	510	576	237	270	256	na	na	na	na	na	na	na	na	na	na	1980	1893	720	593	685	465	643	395	270
M20F	703	na	961	177	157	97	100	94	67	267	na	na	na	na	na	na	na	na	na	na	1212	735	364	329	372	256	270	113	94	53	na	na	na	na	na	na	na	na	na	na	921	953	345	297	376	387	284	202	171
M20G	2971	na	1171	90	99	57	32	32	31	183	na	na	na	na	na	na	na	na	na	na	5767	798	264	261	180	126	104	74	50	139	na	na	na	na	na	na	na	na	na	na	3689	586	204	205	154	110	127	60	48
M20H	120	na	56	7	10	na	15	na	na	na	na	na	na	na	na	na	na	na	na	na	428	45	9	na	14	11	24	na	na	na	na	na	na	na	na	na	na	na	na	na	271	35	25	17	25	na	na	na	na
M20I	na	na	na	na	na	na	na	na	na	na	na	na	na	na	na	na	na	na	na	na	8	na	na	na	na	na	na	na	na	na	na	na	na	na	na	na	na	na	na	na	na	na	na	na	na	na	na	na	na
M20L	1746	na	2250	370	432	260	211	140	48	655	na	na	na	na	na	na	na	na	na	na	2166	1435	642	604	638	409	641	208	159	136	na	na	na	na	na	na	na	na	na	na	1698	1725	631	543	672	445	497	339	201
M20N	1546	na	658	24	14	78	na	6	na	na	na	na	na	na	na	na	na	na	na	na	1337	357	133	62	37	na	55	na	na	na	na	na	na	na	na	na	na	na	na	na	983	328	102	60	63	42	na	12	na
M20P	1663	na	842	75	68	57	16	39	8	na	na	na	na	na	na	na	na	na	na	na	2396	571	213	218	136	71	214	25	16	19	na	na	na	na	na	na	na	na	na	na	1706	525	230	194	124	145	111	50	28
M20Q	1401	na	1497	183	151	96	50	na	8	128	na	na	na	na	na	na	na	na	na	na	1690	733	274	278	231	206	92	68	na	37	na	na	na	na	na	na	na	na	na	na	1299	766	288	352	323	260	229	129	99
M20R	201	na	116	6	na	28	na	na	na	na	na	na	na	na	na	na	na	na	na	na	889	137	32	34	20	12	na	8	na	na	na	na	na	na	na	na	na	na	na	na	445	75	13	9	11	na	na	na	na
M20S	2784	na	1828	190	156	136	110	44	15	93	na	na	na	na	na	na	na	na	na	na	3353	1149	368	339	343	162	221	42	18	61	na	na	na	na	na	na	na	na	na	na	3021	1141	472	434	382	290	263	161	75
M20T	911	na	943	186	189	114	94	124	59	214	na	na	na	na	na	na	na	na	na	na	1556	878	358	294	286	184	189	106	68	122	na	na	na	na	na	na	na	na	na	na	1335	872	236	334	483	347	196	142	118
M20V	1504	na	1260	97	74	29	21	16	16	52	na	na	na	na	na	na	na	na	na	na	2294	580	293	233	147	95	81	42	54	10	na	na	na	na	na	na	na	na	na	na	1979	764	365	239	242	225	205	117	49
M20W	1720	na	985	181	176	59	63	138	22	234	na	na	na	na	na	na	na	na	na	na	1819	888	393	335	346	237	117	104	78	66	na	na	na	na	na	na	na	na	na	na	1731	928	422	340	370	331	275	158	143
M20Y	1519	na	721	94	103	39	60	22	10	364	na	na	na	na	na	na	na	na	na	na	1160	516	261	247	232	156	88	60	86	70	na	na	na	na	na	na	na	na	na	na	1074	565	271	221	240	227	202	97	69
M42*	na	na	na	na	na	na	na	na	na	na	69	90	22	27	3	27	45	9	na	12	803	145	79	54	54	33	36	42	38	13	na	na	na	na	na	na	na	na	na	na	439	81	82	43	36	29	17	37	13
M42A	na	na	na	na	na	na	na	na	na	na	182	1407	564	401	59	336	497	254	352	394	2709	1909	1335	1183	1280	1084	966	752	695	841	na	na	na	na	na	na	na	na	na	na	1764	1837	736	722	1259	1072	1213	885	758
M42C	na	na	na	na	na	na	na	na	na	na	24	227	78	98	12	50	52	35	7	51	379	331	194	176	170	162	258	116	156	81	na	na	na	na	na	na	na	na	na	na	336	282	117	133	140	109	163	80	86
M42D	na	na	na	na	na	na	na	na	na	na	9	9	na	na	4	na	na	5	7	na	136	29	38	15	22	12	13	16	na	na	na	na	na	na	na	na	na	na	na	na	52	15	7	na	11	na	20	na	na
M42E	na	na	na	na	na	na	na	na	na	na	215	656	280	261	16	158	101	62	64	55	3212	1122	1213	1049	1122	848	738	373	336	252	na	na	na	na	na	na	na	na	na	na	2387	1078	803	862	953	876	920	657	357
M42F	na	na	na	na	na	na	na	na	na	na	96	898	291	261	37	324	293	431	793	570	1073	1225	716	701	613	583	563	585	833	1311	na	na	na	na	na	na	na	na	na	na	889	942	472	478	635	514	642	648	662
M42G	na	na	na	na	na	na	na	na	na	na	877	3729	1512	1231	108	1122	602	552	443	507	9397	5503	5092	4069	4095	3287	3385	1805	1752	1680	na	na	na	na	na	na	na	na	na	na	7099	5476	3143	3076	3452	3071	3331	2506	1659
M42H	na	na	na	na	na	na	na	na	na	na	46	218	80	90	8	65	37	35	54	136	557	372	322	237	259	183	88	101	121	73	na	na	na	na	na	na	na	na	na	na	466	354	221	183	196	115	140	121	54
M42I	na	na	na	na	na	na	na	na	na	na	8	na	na	na	4	na	29	na	na	na	na	14	na	na	na	na	na	14	na	na	na	na	na	na	na	na	na	na	na	na	18	11	7	9	7	na	8	12	na
M42K	na	na	na	na	na	na	na	na	na	na	5	na	na	na	2	na	na	na	na	na	40	7	16	na	na	na	na	8	36	na	na	na	na	na	na	na	na	na	na	na	22	32	26	na	na	na	na	17	16
M42L	na	na	na	na	na	na	na	na	na	na	243	3314	921	1085	128	956	1255	1184	1630	1820	4080	4717	2377	2377	1859	2019	2301	2133	3479	4121	na	na	na	na	na	na	na	na	na	na	3075	4114	1556	1626	1926	1906	2141	2812	2642
M42N	na	na	na	na	na	na	na	na	na	na	13	20	na	na	na	na	na	na	na	na	251	41	51	17	20	na	na	18	na	na	na	na	na	na	na	na	na	na	na	na	167	35	25	19	na	23	na	34	12
M42P	na	na	na	na	na	na	na	na	na	na	19	25	11	9	1	na	na	na	na	7	297	67	36	53	19	18	32	12	9	28	na	na	na	na	na	na	na	na	na	na	142	25	26	20	na	na	13	19	8
M42Q	na	na	na	na	na	na	na	na	na	na	258	2962	935	894	106	899	897	951	1167	1213	3461	3218	2030	1856	2092	1880	2283	1602	2419	2813	na	na	na	na	na	na	na	na	na	na	2116	2968	1292	1388	2078	2070	1735	1838	1664
M42R	na	na	na	na	na	na	na	na	na	na	79	106	32	8	4	na	27	9	na	19	580	131	84	75	63	59	73	25	32	24	na	na	na	na	na	na	na	na	na	na	498	118	27	45	48	62	44	30	36
M42S	na	na	na	na	na	na	na	na	na	na	172	1676	570	596	58	328	648	342	133	403	15	2206	1419	1240	1403	1217	1265	909	786	1284	na	na	na	na	na	na	na	na	na	na	2137	2151	1011	977	1207	1340	1208	1067	910
M42T	na	na	na	na	na	na	na	na	na	na	102	353	112	72	8	26	31	31	19	32	1501	820	380	305	202	141	111	115	109	128	na	na	na	na	na	na	na	na	na	na	954	876	263	311	179	205	191	116	73
M42V	na	na	na	na	na	na	na	na	na	na	284	1750	485	417	43	245	150	119	15	85	3456	2661	1864	1610	1390	1035	717	584	273	492	na	na	na	na	na	na	na	na	na	na	2989	2469	1024	1088	1228	812	960	777	307
M42W	na	na	na	na	na	na	na	na	na	na	269	892	268	225	18	73	219	56	22	46	9	1474	1360	1050	913	529	610	317	239	251	na	na	na	na	na	na	na	na	na	na	2035	1467	890	783	599	594	505	346	156
M42Y	na	na	na	na	na	na	na	na	na	na	62	1018	314	269	35	280	237	363	323	613	956	1004	657	546	633	687	855	524	938	1019	na	na	na	na	na	na	na	na	na	na	638	983	417	450	726	540	681	677	635
M92*	216	58	na	na	na	na	na	na	na	na	na	na	na	na	na	na	na	na	na	na	na	na	na	na	na	na	na	na	na	na	72	na	na	na	na	na	na	na	na	na	na	na	na	na	na	na	na	na	na
M92A	1482	1906	na	972	1229	1099	1305	1348	1310	11387	na	na	na	na	na	na	na	na	na	na	na	na	na	na	na	na	na	na	na	na	3549	2770	977	863	1006	1035	1241	1397	1224	1365	na	na	na	na	na	na	na	na	na
M92C	968	1158	na	503	674	810	1311	1146	1083	13100	na	na	na	na	na	na	na	na	na	na	na	na	na	na	na	na	na	na	na	na	2009	1864	503	550	522	665	799	1050	978	1042	na	na	na	na	na	na	na	na	na
M92D	460	152	na	67	32	7	na	15	22	44	na	na	na	na	na	na	na	na	na	na	na	na	na	na	na	na	na	na	na	na	532	40	37	17	167	11	20	6	na	na	na	na	na	na	na	na	na	na	na
M92E	1030	723	na	131	175	62	35	16	6	99	na	na	na	na	na	na	na	na	na	na	na	na	na	na	na	na	na	na	na	na	1120	131	142	125	44	40	43	11	10	na	na	na	na	na	na	na	na	na	na
M92F	772	953	na	424	543	618	762	1059	1148	9673	na	na	na	na	na	na	na	na	na	na	na	na	na	na	na	na	na	na	na	na	1507	1058	411	226	293	343	413	563	531	639	na	na	na	na	na	na	na	na	na
M92G	4756	3594	na	1125	983	572	677	642	791	2073	na	na	na	na	na	na	na	na	na	na	na	na	na	na	na	na	na	na	na	na	8729	3228	1094	990	1110	905	732	579	271	332	na	na	na	na	na	na	na	na	na
M92H	718	1009	na	361	386	207	165	170	301	2085	na	na	na	na	na	na	na	na	na	na	na	na	na	na	na	na	na	na	na	na	1789	1088	329	364	328	364	330	282	201	172	na	na	na	na	na	na	na	na	na
M92I	138	154	17	63	77	134	132	76	66	961	na	na	na	na	na	na	na	na	na	na	na	na	na	na	na	na	na	na	na	na	258	172	30	50	87	59	45	83	67	105	na	na	na	na	na	na	na	na	na
M92K	19	14	na	na	na	na	na	na	na	na	na	na	na	na	na	na	na	na	na	na	na	na	na	na	na	na	na	na	na	na	na	12	na	na	na	na	na	na	na	na	na	na	na	na	na	na	na	na	na
M92L	1266	1504	na	681	922	1038	1161	1839	1399	10708	na	na	na	na	na	na	na	na	na	na	na	na	na	na	na	na	na	na	na	na	2356	1990	525	491	505	564	609	858	876	810	na	na	na	na	na	na	na	na	na
M92N	1660	1248	na	451	460	240	216	296	323	1644	na	na	na	na	na	na	na	na	na	na	na	na	na	na	na	na	na	na	na	na	2539	1725	355	416	323	328	271	224	121	166	na	na	na	na	na	na	na	na	na
M92P	1260	636	na	275	133	66	106	116	31	136	na	na	na	na	na	na	na	na	na	na	na	na	na	na	na	na	na	na	na	na	2179	634	206	154	105	176	104	113	26	30	na	na	na	na	na	na	na	na	na
M92Q	1597	2420	na	833	981	774	609	880	795	5851	na	na	na	na	na	na	na	na	na	na	na	na	na	na	na	na	na	na	na	na	3266	3520	791	633	778	762	743	689	554	576	na	na	na	na	na	na	na	na	na
M92R	1934	606	na	111	129	211	65	126	49	44	na	na	na	na	na	na	na	na	na	na	na	na	na	na	na	na	na	na	na	na	2293	447	153	164	188	81	30	30	7	6	na	na	na	na	na	na	na	na	na
M92S	1776	2928	na	911	1040	1186	796	1212	880	5725	na	na	na	na	na	na	na	na	na	na	na	na	na	na	na	na	na	na	na	na	3722	3308	732	706	876	884	820	931	675	730	na	na	na	na	na	na	na	na	na
M92T	710	928	na	379	505	511	687	457	943	3717	na	na	na	na	na	na	na	na	na	na	na	na	na	na	na	na	na	na	na	na	1514	1052	296	353	391	430	464	579	499	504	na	na	na	na	na	na	na	na	na
M92V	1286	1784	na	505	751	659	975	1108	1034	8902	na	na	na	na	na	na	na	na	na	na	na	na	na	na	na	na	na	na	na	na	2102	1425	394	342	378	431	485	634	527	579	na	na	na	na	na	na	na	na	na
M92W	1720	2701	na	983	1153	1189	959	1167	1107	8668	na	na	na	na	na	na	na	na	na	na	na	na	na	na	na	na	na	na	na	na	3596	3036	806	784	740	986	988	1039	817	778	na	na	na	na	na	na	na	na	na
M92Y	593	835	na	368	404	464	571	645	572	4215	na	na	na	na	na	na	na	na	na	na	na	na	na	na	na	na	na	na	na	na	1540	1083	434	373	440	459	478	537	540	576	na	na	na	na	na	na	na	na	na
N147*	na	na	na	na	na	na	na	na	na	na	358	110	35	7	4	na	7	na	na	na	na	na	na	na	na	na	na	na	na	na	292	64	8	na	na	na	na	na	na	na	na	na	na	na	na	na	na	na	na
N147A	na	na	na	na	na	na	na	na	na	na	7024	4743	2991	1196	215	2058	2429	2688	3153	3558	na	na	na	na	na	na	na	na	na	na	43	8890	1885	1793	2190	2970	2982	2947	2909	2957	na	na	na	na	na	na	na	na	na
N147C	na	na	na	na	na	na	na	na	na	na	1618	1340	588	214	49	268	336	296	319	382	na	na	na	na	na	na	na	na	na	na	1415	1797	414	335	368	509	584	446	375	354	na	na	na	na	na	na	na	na	na
N147D	na	na	na	na	na	na	na	na	na	na	na	89	11	14	7	na	na	7	8	7	na	na	na	na	na	na	na	na	na	na	na	na	na	na	na	na	na	na	na	na	na	na	na	na	na	na	na	na	na
N147E	na	na	na	na	na	na	na	na	na	na	6211	4376	2612	1140	145	1270	1496	1502	1539	1906	na	na	na	na	na	na	na	na	na	na	5415	7648	1477	1717	2193	2159	2162	2069	1581	1677	na	na	na	na	na	na	na	na	na
N147F	na	na	na	na	na	na	na	na	na	na	2301	1439	826	354	44	288	409	149	82	197	na	na	na	na	na	na	na	na	na	na	2671	2422	417	423	381	503	470	372	189	174	na	na	na	na	na	na	na	na	na
N147G	na	na	na	na	na	na	na	na	na	na	2	13748	7872	3168	528	3844	4224	3865	3039	4066	na	na	na	na	na	na	na	na	na	na	65	22204	4765	4614	6017	6655	6242	5416	4179	4057	na	na	na	na	na	na	na	na	na
N147H	na	na	na	na	na	na	na	na	na	na	1266	1116	22	10	5	na	na	6	16	10	na	na	na	na	na	na	na	na	na	na	1189	1417	na	na	na	na	na	na	na	na	na	na	na	na	na	na	na	na	na
N147I	na	na	na	na	na	na	na	na	na	na	6	8	11	na	7	na	na	na	na	na	na	na	na	na	na	na	na	na	na	na	na	na	na	na	na	na	na	na	na	na	na	na	na	na	na	na	na	na	na
N147K	na	na	na	na	na	na	na	na	na	na	3	19	17	4	6	na	na	na	na	na	na	na	na	na	na	na	na	na	na	na	6	na	5	na	na	na	na	na	na	na	na	na	na	na	na	na	na	na	na
N147L	na	na	na	na	na	na	na	na	na	na	7363	5604	2968	1143	170	1117	883	1156	763	1168	na	na	na	na	na	na	na	na	na	na	26	9010	1915	1784	1957	2147	1912	1646	1117	1190	na	na	na	na	na	na	na	na	na
N147M	na	na	na	na	na	na	na	na	na	na	4022	2698	1559	639	97	579	665	773	458	834	na	na	na	na	na	na	na	na	na	na	3266	4327	763	719	733	1069	1150	857	667	585	na	na	na	na	na	na	na	na	na
N147P	na	na	na	na	na	na	na	na	na	na	2	5237	2711	1066	129	797	1106	731	418	585	na	na	na	na	na	na	na	na	na	na	18	7933	1356	1322	1346	1514	1128	818	645	532	na	na	na	na	na	na	na	na	na
N147Q	na	na	na	na	na	na	na	na	na	na	2599	1693	1135	495	76	582	502	844	702	952	na	na	na	na	na	na	na	na	na	na	2134	3141	550	613	612	987	934	943	791	778	na	na	na	na	na	na	na	na	na
N147R	na	na	na	na	na	na	na	na	na	na	12555	8461	4547	1948	300	2116	1934	1923	1764	2418	na	na	na	na	na	na	na	na	na	na	11547	14036	2868	2928	2663	3389	3210	2442	1930	1736	na	na	na	na	na	na	na	na	na
N147S	na	na	na	na	na	na	na	na	na	na	2	2572	1545	778	86	872	778	917	1014	1222	na	na	na	na	na	na	na	na	na	na	2960	4387	1004	872	968	1166	1286	1258	1122	1099	na	na	na	na	na	na	na	na	na
N147T	na	na	na	na	na	na	na	na	na	na	5320	4605	1923	779	126	1054	855	1057	1489	1355	na	na	na	na	na	na	na	na	na	na	4388	6326	973	941	1188	1423	1495	1529	1270	1253	na	na	na	na	na	na	na	na	na
N147V	na	na	na	na	na	na	na	na	na	na	1	6955	3826	1707	224	1297	1485	1644	1162	1651	na	na	na	na	na	na	na	na	na	na	10	10686	2155	2106	1885	2721	2796	2525	1888	1632	na	na	na	na	na	na	na	na	na
N147W	na	na	na	na	na	na	na	na	na	na	2846	2065	1062	463	50	248	470	309	432	323	na	na	na	na	na	na	na	na	na	na	2328	3235	577	681	541	769	639	552	422	363	na	na	na	na	na	na	na	na	na
N147Y	na	na	na	na	na	na	na	na	na	na	2	na	11	na	5	na	na	na	na	na	na	na	na	na	na	na	na	na	na	na	na	na	na	na	na	na	na	na	na	na	na	na	na	na	na	na	na	na	na
N18*	265	na	127	10	12	na	na	na	na	na	na	na	na	na	na	na	na	na	na	na	638	96	24	32	45	20	28	9	17	30	na	na	na	na	na	na	na	na	na	na	221	48	12	18	13	na	29	na	19
N18A	6	na	2121	712	906	839	929	934	751	6138	na	na	na	na	na	na	na	na	na	na	2878	2936	1229	1337	1698	1492	1929	988	1515	1503	na	na	na	na	na	na	na	na	na	na	2480	3078	1055	792	1011	1289	1070	1127	1032
N18C	456	na	291	178	258	296	221	239	137	1277	na	na	na	na	na	na	na	na	na	na	639	904	343	435	490	353	355	271	314	467	na	na	na	na	na	na	na	na	na	na	492	756	286	237	278	290	332	307	286
N18D	na	na	26	na	na	14	na	na	16	na	na	na	na	na	na	na	na	na	na	na	na	na	na	na	na	na	na	na	na	na	na	na	na	na	na	na	na	na	na	na	32	na	na	na	17	20	na	na	na
N18E	11	na	4787	2052	2560	2794	2377	2493	1808	14806	na	na	na	na	na	na	na	na	na	na	6207	7608	3176	3162	4318	3992	4609	2572	3252	3640	na	na	na	na	na	na	na	na	na	na	17	7135	1959	2048	2977	2476	2688	2866	2366
N18F	1248	na	697	395	548	351	461	706	524	4221	na	na	na	na	na	na	na	na	na	na	988	1341	563	577	711	731	1021	530	633	853	na	na	na	na	na	na	na	na	na	na	781	1112	408	364	647	546	493	543	503
N18G	104	26	39558	17376	22293	17894	21931	21263	20178	150602	na	na	na	na	na	na	na	na	na	na	57222	24	25273	26009	34492	33584	38742	21934	28734	29865	na	na	na	na	na	na	na	na	na	na	136	8	19287	17946	26223	22805	25794	24224	23246
N18H	5	na	7	na	na	na	na	6	11	na	na	na	na	na	na	na	na	na	na	na	na	na	na	8	na	na	na	na	na	na	na	na	na	na	na	na	na	na	na	na	na	na	na	na	na	na	na	na	na
N18I	54	na	20	na	na	na	na	na	na	na	na	na	na	na	na	na	na	na	na	na	na	na	na	na	na	na	na	na	na	na	na	na	na	na	na	na	na	na	na	na	na	na	na	na	na	na	na	na	na
N18K	8	na	14	na	na	27	na	8	10	na	na	na	na	na	na	na	na	na	na	na	19	748	na	na	na	14	13	na	8	na	na	na	na	na	na	na	na	na	na	na	75	613	na	na	na	na	10	7	na
N18L	17	na	4977	2452	3334	3250	4164	3860	4311	35715	na	na	na	na	na	na	na	na	na	na	7905	9589	3825	3887	5713	5707	7257	4410	6405	7259	na	na	na	na	na	na	na	na	na	na	17	9030	2943	2711	4056	4121	4315	4416	4429
N18M	10	na	5863	2745	3352	3629	3056	3433	3115	25760	na	na	na	na	na	na	na	na	na	na	8104	8811	3433	3654	4936	5125	5563	3520	4836	4770	na	na	na	na	na	na	na	na	na	na	14	8351	3086	2679	4131	3837	3994	3907	3558
N18P	243	na	42	22	7	na	15	14	na	38	na	na	na	na	na	na	na	na	na	na	415	60	20	9	18	na	na	7	13	20	na	na	na	na	na	na	na	na	na	na	259	48	13	7	16	na	na	na	na
N18Q	332	na	402	268	414	385	561	606	594	4676	na	na	na	na	na	na	na	na	na	na	1070	1258	521	566	815	713	839	653	629	1014	na	na	na	na	na	na	na	na	na	na	671	1353	404	375	618	635	600	653	711
N18R	36	na	11988	4812	6146	5482	5669	6362	5359	43279	na	na	na	na	na	na	na	na	na	na	15332	17033	7046	7524	9472	9413	10041	5914	7957	8267	na	na	na	na	na	na	na	na	na	na	45	17440	5476	5236	7211	7381	7267	6927	6519
N18S	678	na	938	336	429	350	342	408	326	2361	na	na	na	na	na	na	na	na	na	na	1270	1647	603	815	811	723	706	544	517	488	na	na	na	na	na	na	na	na	na	na	1017	1479	405	388	532	441	554	489	431
N18T	345	12	818	363	469	239	473	618	604	3639	na	na	na	na	na	na	na	na	na	na	1150	16	634	544	836	730	658	595	717	868	na	na	na	na	na	na	na	na	na	na	668	42	324	323	459	514	535	428	450
N18V	16	na	10969	3120	3776	2295	2979	2548	1730	11571	na	na	na	na	na	na	na	na	na	na	12796	12700	5303	5202	6552	5482	5717	2789	3073	2713	na	na	na	na	na	na	na	na	na	na	19	12463	3905	3708	4569	4341	4586	3458	2735
N18W	11	na	4106	1723	2161	2338	2071	1910	1997	11980	na	na	na	na	na	na	na	na	na	na	5273	5827	2508	2619	3545	3259	3070	1922	2333	2393	na	na	na	na	na	na	na	na	na	na	22	6141	1894	1801	2243	2287	2474	2124	1898
N23*	69	na	40	na	na	na	na	na	na	na	na	na	na	na	na	na	na	na	na	na	261	27	9	na	na	na	na	na	na	14	na	na	na	na	na	na	na	na	na	na	49	19	na	11	15	na	na	na	na
N23A	7	na	974	457	598	718	716	866	757	8069	na	na	na	na	na	na	na	na	na	na	1518	1735	641	743	887	1040	1225	758	1194	1436	na	na	na	na	na	na	na	na	na	na	6	1572	509	461	658	757	774	846	835
N23C	590	na	497	245	387	362	369	372	373	3382	na	na	na	na	na	na	na	na	na	na	735	813	337	327	499	521	538	380	564	490	na	na	na	na	na	na	na	na	na	na	690	912	220	264	438	295	426	367	372
N23D	na	na	8	na	na	na	na	na	na	na	na	na	na	na	na	na	na	na	na	na	10	na	na	na	na	na	10	na	na	29	na	na	na	na	na	na	na	na	na	na	12	9	na	na	na	na	na	na	na
N23E	4	na	1882	596	801	918	667	863	791	5854	na	na	na	na	na	na	na	na	na	na	2056	2210	748	809	1206	1268	1703	875	1316	1101	na	na	na	na	na	na	na	na	na	na	5	1965	660	709	1058	1038	962	939	866
N23F	8	na	2078	764	949	803	854	1087	650	5349	na	na	na	na	na	na	na	na	na	na	2689	2699	1245	1025	1576	1315	1547	823	1017	888	na	na	na	na	na	na	na	na	na	na	2175	2673	757	860	1344	1314	1054	1038	835
N23G	6	na	2149	997	1456	1795	1738	2129	1721	14633	na	na	na	na	na	na	na	na	na	na	3444	3859	1653	1679	2585	2304	2819	1772	2731	3059	na	na	na	na	na	na	na	na	na	na	8	4091	1320	1114	1885	1587	1986	1975	2158
N23H	65	na	12	na	na	na	na	na	na	na	na	na	na	na	na	na	na	na	na	na	8	na	na	na	na	na	10	na	na	9	na	na	na	na	na	na	na	na	na	na	43	na	na	na	16	na	na	na	na
N23I	12	14	176	na	na	47	51	12	7	na	na	na	na	na	na	na	na	na	na	na	22	15	na	na	na	39	38	10	na	na	na	na	na	na	na	na	na	na	na	na	6	24	na	na	na	26	9	15	na
N23K	1292	na	1265	na	21	14	60	na	5	5141	na	na	na	na	na	na	na	na	na	na	2586	3990	40	404	393	132	16	na	na	na	na	na	na	na	na	na	na	na	na	na	8	3089	15	185	94	7	na	7	na
N23L	3480	7	3959	1529	1893	1887	1832	1718	1369	12771	na	na	na	na	na	na	na	na	na	na	5298	5536	2154	2264	3189	2744	2746	1848	2760	2428	na	na	na	na	na	na	na	na	na	na	4193	5550	1715	1831	2474	1984	2408	2231	2096
N23M	624	10	1200	482	794	908	730	800	881	6020	na	na	na	na	na	na	na	na	na	na	1825	2079	793	873	1166	1120	1376	842	1233	1258	na	na	na	na	na	na	na	na	na	na	11	2128	770	649	973	894	1197	1030	1045
N23P	2766	na	2886	718	956	700	638	508	434	3484	na	na	na	na	na	na	na	na	na	na	3784	3168	1214	1305	1636	1422	1359	706	836	956	na	na	na	na	na	na	na	na	na	na	3194	3246	1225	893	1225	861	1169	904	788
N23Q	648	na	1033	272	533	498	340	798	362	3160	na	na	na	na	na	na	na	na	na	na	1098	1113	465	530	795	677	769	517	502	700	na	na	na	na	na	na	na	na	na	na	703	1308	402	561	533	598	577	605	573
N23R	6	na	2920	1170	1438	1132	1672	1664	2029	11752	na	na	na	na	na	na	na	na	na	na	3874	4452	1924	1761	2427	2501	2424	1497	2329	1939	na	na	na	na	na	na	na	na	na	na	2820	4128	1263	1205	1665	1405	1768	1824	1582
N23S	1024	na	1194	493	609	536	418	461	567	2533	na	na	na	na	na	na	na	na	na	na	1647	1797	682	754	1037	868	944	514	708	552	na	na	na	na	na	na	na	na	na	na	1082	1611	466	484	997	706	581	476	477
N23T	49	28	783	244	774	769	552	490	442	3224	na	na	na	na	na	na	na	na	na	na	871	39	334	368	931	772	575	449	655	538	na	na	na	na	na	na	na	na	na	na	84	35	227	216	632	622	389	307	351
N23V	6	na	1894	770	1144	778	1083	1145	1100	9503	na	na	na	na	na	na	na	na	na	na	2561	2919	1113	1398	1866	1684	1931	1265	1733	1830	na	na	na	na	na	na	na	na	na	na	7	3343	939	886	1438	1331	1360	1510	1265
N23W	711	na	658	403	562	473	594	555	484	2168	na	na	na	na	na	na	na	na	na	na	1296	1265	585	792	693	679	570	409	578	594	na	na	na	na	na	na	na	na	na	na	963	1451	447	465	584	679	512	605	519
N34*	204	na	124	15	na	6	21	na	7	na	na	na	na	na	na	na	na	na	na	na	507	69	na	na	21	na	19	na	na	na	na	na	na	na	na	na	na	na	na	na	132	12	na	na	na	na	na	na	na
N34A	8	na	3566	1631	2200	1826	1952	1601	2126	12452	na	na	na	na	na	na	na	na	na	na	5358	5609	2603	2888	3592	3854	4314	2055	2608	2450	na	na	na	na	na	na	na	na	na	na	12	5576	1982	1954	2607	3443	2469	2253	2192
N34C	1005	na	1404	592	706	713	671	842	779	6199	na	na	na	na	na	na	na	na	na	na	1790	1925	784	867	1127	1075	1112	715	953	1026	na	na	na	na	na	na	na	na	na	na	1392	1857	937	591	912	664	836	879	747
N34D	10	na	na	na	na	na	na	na	na	na	na	na	na	na	na	na	na	na	na	na	na	na	na	na	na	na	na	na	na	na	na	na	na	na	na	na	na	na	na	na	na	na	na	na	na	na	na	na	na
N34E	4	na	4455	1864	2528	2104	2336	2073	2477	14468	na	na	na	na	na	na	na	na	na	na	6311	6754	2843	3004	4235	3932	4345	2430	3420	3257	na	na	na	na	na	na	na	na	na	na	17	6830	2194	2319	3113	3395	3156	2904	2486
N34F	2396	na	2619	1083	1390	1366	1441	958	834	7067	na	na	na	na	na	na	na	na	na	na	3326	3410	1360	1721	2063	1988	1916	1040	1441	1685	na	na	na	na	na	na	na	na	na	na	2633	3295	1104	1054	1600	1651	1511	1387	1187
N34G	92	na	20842	8568	11285	10284	10701	12035	10916	83030	na	na	na	na	na	na	na	na	na	na	30663	33305	13618	14373	19123	17626	21594	11950	17308	19389	na	na	na	na	na	na	na	na	na	na	54	32375	11338	10308	14405	13743	13423	13083	11844
N34H	na	na	7	na	na	na	na	8	na	na	na	na	na	na	na	na	na	na	na	na	na	na	na	na	na	na	na	na	na	na	na	na	na	na	na	na	na	na	na	na	na	na	na	na	na	na	na	na	na
N34I	12	9	59	na	22	92	11	23	16	na	na	na	na	na	na	na	na	na	na	na	7	8	na	na	na	18	9	na	8	na	na	na	na	na	na	na	na	na	na	na	24	na	12	na	18	7	na	na	8
N34K	51	na	6	5	13	9	17	20	14	na	na	na	na	na	na	na	na	na	na	na	9	na	9	na	na	na	na	na	na	na	na	na	na	na	na	na	na	na	na	na	na	23	na	na	na	na	na	na	na
N34L	14	na	7135	3451	4342	3596	4582	4555	3887	28639	na	na	na	na	na	na	na	na	na	na	10564	10831	4755	5321	6905	6261	7325	4062	5464	5565	na	na	na	na	na	na	na	na	na	na	27	10359	3524	3435	5001	5726	4919	4765	4076
N34M	2077	na	2237	1042	1366	1307	1562	1218	877	7073	na	na	na	na	na	na	na	na	na	na	3509	3483	1537	1561	2222	2029	2093	1193	1440	1488	na	na	na	na	na	na	na	na	na	na	2432	3463	1147	1070	1466	1393	1774	1340	1217
N34P	350	na	69	5	6	10	na	9	14	na	na	na	na	na	na	na	na	na	na	na	574	73	17	31	26	18	44	7	28	16	na	na	na	na	na	na	na	na	na	na	229	47	18	8	16	14	9	na	na
N34Q	8	na	1813	957	1283	1166	1767	1425	1698	15607	na	na	na	na	na	na	na	na	na	na	2888	3414	1367	1457	2104	2236	2567	1768	2866	2748	na	na	na	na	na	na	na	na	na	na	2107	3115	1124	1020	1649	1693	1668	1781	1747
N34R	22	8	9303	4139	5359	5079	5383	6188	5887	37875	na	na	na	na	na	na	na	na	na	na	12985	14730	6017	6341	8846	8850	9142	5642	8288	8568	na	na	na	na	na	na	na	na	na	na	28	13714	4871	4530	6521	6217	6795	6712	6351
N34S	2174	na	2111	990	1269	1444	1575	1330	1432	9735	na	na	na	na	na	na	na	na	na	na	2901	3282	1475	1462	2141	1990	1911	1384	1948	2087	na	na	na	na	na	na	na	na	na	na	2471	3266	1302	995	1660	1554	1592	1449	1429
N34T	1222	12	1918	718	969	533	633	745	560	6011	na	na	na	na	na	na	na	na	na	na	2444	26	1040	1039	1280	1204	1387	638	846	1267	na	na	na	na	na	na	na	na	na	na	47	32	785	786	1031	940	914	886	825
N34V	28	na	7803	3734	4748	3872	4605	5164	4097	30099	na	na	na	na	na	na	na	na	na	na	11124	12205	5388	5650	7152	7261	8092	4553	6621	6378	na	na	na	na	na	na	na	na	na	na	25	11746	3959	3736	5557	5508	5802	5321	4987
N34W	8	5	3828	1756	2364	2282	2712	2348	2296	17284	na	na	na	na	na	na	na	na	na	na	5835	8	2461	2790	3643	3513	4745	2474	2993	3321	na	na	na	na	na	na	na	na	na	na	18	5834	2184	2085	2991	2567	3109	2978	2667
N34Y	19	15	325	34	51	95	158	47	50	133	na	na	na	na	na	na	na	na	na	na	22	20	na	8	10	43	130	32	31	19	na	na	na	na	na	na	na	na	na	na	8	19	14	21	27	55	65	10	38
N37*	532	na	139	14	7	6	78	9	34	309	na	na	na	na	na	na	na	na	na	na	652	57	na	na	25	26	19	na	na	na	na	na	na	na	na	na	na	na	na	na	195	44	na	19	28	25	na	15	na
N37A	19	6	4834	2280	2981	2744	2469	2940	2256	19295	na	na	na	na	na	na	na	na	na	na	7618	8056	3623	3790	4923	4875	5753	3021	3563	3771	na	na	na	na	na	na	na	na	na	na	26	7541	2741	2836	3486	3584	3952	3509	2988
N37C	8	na	2381	1026	1344	959	966	1090	844	6010	na	na	na	na	na	na	na	na	na	na	3118	2995	1399	1554	2009	1746	2266	1038	1347	1304	na	na	na	na	na	na	na	na	na	na	9	3142	1139	1025	1440	1326	1419	1254	1092
N37D	9	na	2419	1255	1577	1668	2105	1886	1178	10316	na	na	na	na	na	na	na	na	na	na	3849	4173	1784	2173	2943	2634	3086	1741	2307	2348	na	na	na	na	na	na	na	na	na	na	14	4038	1690	1446	2058	1830	2111	2068	1846
N37E	7	na	3883	1888	2613	2385	3289	3558	3182	25629	na	na	na	na	na	na	na	na	na	na	5350	6232	2546	2860	3944	4185	5183	3070	4703	4659	na	na	na	na	na	na	na	na	na	na	20	6100	2295	2057	3128	3388	3648	3462	3476
N37F	35	7	3620	1668	2368	1770	2398	2676	2566	20694	na	na	na	na	na	na	na	na	na	na	5111	5527	2615	3025	3785	3828	4973	2614	3383	3981	na	na	na	na	na	na	na	na	na	na	14	5119	1961	1929	2848	2540	2946	2837	2782
N37G	45	na	16132	6710	9416	8357	9484	8279	7812	64386	na	na	na	na	na	na	na	na	na	na	21427	23372	10542	10804	15026	14157	15453	9175	11961	12743	na	na	na	na	na	na	na	na	na	na	62	22183	8256	7725	11092	11693	11388	10488	9871
N37H	3234	12	3073	1719	2073	2069	2025	1765	1745	13041	na	na	na	na	na	na	na	na	na	na	4491	5057	2222	2393	3253	3022	3555	2025	2648	2617	na	na	na	na	na	na	na	na	na	na	10	4879	1726	1690	2539	2720	2493	2146	2022
N37I	1393	7	1484	778	835	1133	801	845	611	4096	na	na	na	na	na	na	na	na	na	na	2378	2255	1053	1087	1354	1333	1307	699	927	957	na	na	na	na	na	na	na	na	na	na	2033	2255	1096	954	1183	941	919	926	686
N37K	5	na	na	na	9	7	na	50	19	85	na	na	na	na	na	na	na	na	na	na	70	10	30	11	21	11	34	8	21	85	na	na	na	na	na	na	na	na	na	na	27	10	na	na	39	60	35	18	24
N37L	26	15	9298	4517	5959	4674	6026	5869	4907	43561	na	na	na	na	na	na	na	na	na	na	13302	15272	6706	7361	9833	10084	11635	6086	8664	8472	na	na	na	na	na	na	na	na	na	na	40	8	5848	4864	6979	6319	6912	6779	6209
N37M	2028	na	2711	1136	1709	1449	2240	1428	1659	12659	na	na	na	na	na	na	na	na	na	na	3382	3923	1713	1769	2570	2626	2985	1870	2876	2820	na	na	na	na	na	na	na	na	na	na	2421	3645	1326	1280	1965	1764	2023	2017	2081
N37P	10	na	7850	2339	2824	1642	2122	1838	905	7630	na	na	na	na	na	na	na	na	na	na	10029	10	5282	4524	5471	4146	5154	2062	2223	2269	na	na	na	na	na	na	na	na	na	na	32	9917	3302	3127	3889	3803	3182	2580	1971
N37Q	2383	na	2654	1178	1709	1158	2141	2003	2226	13573	na	na	na	na	na	na	na	na	na	na	3550	3958	1626	1765	2759	2612	3229	1907	2344	2207	na	na	na	na	na	na	na	na	na	na	2921	3599	1204	1193	1891	1869	1975	1968	1919
N37R	16	na	8745	4296	5786	4657	5786	6184	5499	41951	na	na	na	na	na	na	na	na	na	na	13405	15035	6483	6921	9656	8929	9820	6399	8659	8780	na	na	na	na	na	na	na	na	na	na	26	13541	5104	4819	6696	7582	7233	6945	6343
N37S	19	na	6591	2888	3765	3546	4162	3501	3266	24975	na	na	na	na	na	na	na	na	na	na	8923	9394	4474	4471	6121	5824	7968	3951	5185	6101	na	na	na	na	na	na	na	na	na	na	20	8927	3448	3142	4503	4301	4662	4161	3682
N37T	4	na	4753	2163	2794	3046	2977	2739	2668	18102	na	na	na	na	na	na	na	na	na	na	6842	7726	3301	3823	4691	4419	4724	2996	3855	3326	na	na	na	na	na	na	na	na	na	na	7	6833	2353	2284	3761	3780	3449	3254	2897
N37V	20	na	8225	3044	3858	3168	4674	4195	3631	25859	na	na	na	na	na	na	na	na	na	na	9421	10184	4550	4721	6377	6384	7454	4300	5240	6088	na	na	na	na	na	na	na	na	na	na	23	9734	3634	3432	4608	4451	4773	4621	4137
N37W	18	7	5352	2400	3242	2512	3346	3287	3152	24003	na	na	na	na	na	na	na	na	na	na	7316	22	3585	3733	5090	5151	6112	3522	4395	4648	na	na	na	na	na	na	na	na	na	na	34	20	2687	2564	3721	3459	3983	4079	3756
N37Y	4	na	1713	1055	1260	1253	1168	1463	1243	11188	na	na	na	na	na	na	na	na	na	na	2587	3156	1461	1557	2074	2022	2477	1482	1631	2012	na	na	na	na	na	na	na	na	na	na	2036	2736	991	866	1516	2615	1580	1511	1340
N59*	na	na	na	na	na	na	na	na	na	na	40	60	21	8	1	10	10	na	na	15	520	84	35	37	52	20	na	14	25	22	na	na	na	na	na	na	na	na	na	na	163	59	21	23	61	na	36	14	7
N59A	na	na	na	na	na	na	na	na	na	na	300	4661	1354	1415	174	1359	1550	1633	1739	2202	4533	4453	2461	2005	2190	2080	2684	2041	2753	3691	na	na	na	na	na	na	na	na	na	na	2523	4088	1278	1397	2068	2229	2128	2133	1986
N59C	na	na	na	na	na	na	na	na	na	na	137	2235	590	617	81	731	894	714	982	986	1987	2170	1180	1094	1128	1099	1281	1116	1298	1901	na	na	na	na	na	na	na	na	na	na	1617	2097	758	849	1080	971	1147	1218	1079
N59D	na	na	na	na	na	na	na	na	na	na	119	927	370	226	37	181	132	169	104	196	1459	1201	721	595	696	565	557	422	460	380	na	na	na	na	na	na	na	na	na	na	1047	1146	501	404	585	641	467	429	306
N59E	na	na	na	na	na	na	na	na	na	na	380	4433	1412	1239	169	901	1145	808	828	1329	4496	4541	2254	2134	2173	2019	2311	1701	2018	1940	na	na	na	na	na	na	na	na	na	na	3078	4210	1656	1708	2341	2124	2165	1763	1565
N59F	na	na	na	na	na	na	na	na	na	na	133	2179	670	651	75	581	832	646	556	709	1482	2084	1096	1017	1000	872	1024	827	891	944	na	na	na	na	na	na	na	na	na	na	1190	1967	728	662	989	833	860	903	755
N59G	na	na	na	na	na	na	na	na	na	na	1655	24115	7253	6914	854	6259	7712	6363	6486	8503	19043	24569	12785	11062	11414	10854	13805	9107	11896	12527	na	na	na	na	na	na	na	na	na	na	14968	22663	8107	8325	11482	9712	10819	9962	8940
N59H	na	na	na	na	na	na	na	na	na	na	101	1344	378	345	38	493	245	529	329	563	1298	1146	648	700	614	507	571	540	750	672	na	na	na	na	na	na	na	na	na	na	715	1115	473	496	633	430	610	563	637
N59I	na	na	na	na	na	na	na	na	na	na	121	1631	496	429	62	451	706	609	601	933	1224	1676	832	789	698	722	893	754	1099	1102	na	na	na	na	na	na	na	na	na	na	952	1497	600	550	873	752	852	937	838
N59K	na	na	na	na	na	na	na	na	na	na	303	2889	1204	1276	44	na	17	423	555	1292	3413	3220	888	576	467	394	814	314	9	na	na	na	na	na	na	na	na	na	na	na	2467	2903	483	475	595	653	259	112	na
N59L	na	na	na	na	na	na	na	na	na	na	433	5601	1666	1467	211	1322	1431	1362	1330	1742	4022	5496	3038	2672	2815	2396	2722	1992	2910	2911	na	na	na	na	na	na	na	na	na	na	3469	5022	1766	1760	2658	2630	2470	2297	1738
N59M	na	na	na	na	na	na	na	na	na	na	214	2912	921	835	111	717	1172	1018	811	922	3182	2883	1642	1454	1592	1381	1948	1159	1439	1208	na	na	na	na	na	na	na	na	na	na	1989	2621	1073	990	1538	1304	1368	1214	997
N59P	na	na	na	na	na	na	na	na	na	na	163	2400	690	681	74	715	784	651	964	1187	2190	2152	1141	979	1086	955	1225	970	1206	1504	na	na	na	na	na	na	na	na	na	na	1183	1883	597	624	895	704	1018	931	933
N59Q	na	na	na	na	na	na	na	na	na	na	92	1336	350	402	41	229	346	383	563	424	1530	1248	652	549	595	540	597	459	582	692	na	na	na	na	na	na	na	na	na	na	890	1120	466	430	709	513	584	507	499
N59R	na	na	na	na	na	na	na	na	na	na	372	2751	906	851	92	491	641	319	268	567	4619	3672	2192	1995	2137	1776	1595	1186	1019	903	na	na	na	na	na	na	na	na	na	na	3195	3417	1354	1383	1451	1570	1527	1228	886
N59S	na	na	na	na	na	na	na	na	na	na	333	4625	1432	1321	180	1294	1705	1542	1796	2009	2879	4703	2508	2321	2312	2423	2453	2031	2569	3255	na	na	na	na	na	na	na	na	na	na	3029	4249	1453	1638	2433	2490	2329	2282	1942
N59T	na	na	na	na	na	na	na	na	na	na	305	3965	1176	1241	163	1105	1758	1195	1454	1881	4491	3875	2051	1976	1953	1719	2170	1807	2698	3059	na	na	na	na	na	na	na	na	na	na	2252	3555	1381	1306	2010	1892	1944	1923	1879
N59V	na	na	na	na	na	na	na	na	na	na	484	8400	2388	2459	349	2554	3851	3317	3999	5070	6802	8216	4334	4142	4077	3872	5108	4210	5763	7541	na	na	na	na	na	na	na	na	na	na	4952	7231	2780	2829	4151	3836	4213	4562	4661
N59W	na	na	na	na	na	na	na	na	na	na	261	3044	1016	874	113	680	484	545	466	820	3271	3347	1801	1549	1579	1373	1744	1128	1142	1205	na	na	na	na	na	na	na	na	na	na	2006	3092	1137	1104	1481	1413	1205	1189	846
N59Y	na	na	na	na	na	na	na	na	na	na	89	588	226	155	24	107	103	78	49	104	675	887	585	519	544	369	505	269	224	244	na	na	na	na	na	na	na	na	na	na	673	841	536	320	372	276	433	293	188
P105*	423	106	na	25	37	136	na	8	7	na	na	na	na	na	na	na	na	na	na	na	na	na	na	na	na	na	na	na	na	na	315	74	34	52	26	60	54	51	46	47	na	na	na	na	na	na	na	na	na
P105A	718	1545	na	428	559	757	496	569	540	5017	na	na	na	na	na	na	na	na	na	na	na	na	na	na	na	na	na	na	na	na	2537	2455	324	287	285	304	438	396	439	439	na	na	na	na	na	na	na	na	na
P105C	889	1236	na	641	677	513	701	641	738	5649	na	na	na	na	na	na	na	na	na	na	na	na	na	na	na	na	na	na	na	na	2244	1810	599	544	813	658	729	738	773	796	na	na	na	na	na	na	na	na	na
P105D	1364	1612	na	731	946	869	1062	1036	1029	6344	na	na	na	na	na	na	na	na	na	na	na	na	na	na	na	na	na	na	na	na	2772	1661	837	554	647	802	891	965	811	788	na	na	na	na	na	na	na	na	na
P105E	2102	3467	na	1452	1770	1609	1845	1443	1714	12046	na	na	na	na	na	na	na	na	na	na	na	na	na	na	na	na	na	na	na	na	5222	4549	1339	1066	1322	1538	1645	1676	1646	1643	na	na	na	na	na	na	na	na	na
P105F	2071	3463	na	1495	1861	1850	2010	1982	1578	14447	na	na	na	na	na	na	na	na	na	na	na	na	na	na	na	na	na	na	na	na	4501	4387	903	888	1141	1162	1429	1438	1122	1236	na	na	na	na	na	na	na	na	na
P105G	10424	15178	na	6857	8468	8491	8949	9774	7984	62437	na	na	na	na	na	na	na	na	na	na	na	na	na	na	na	na	na	na	na	na	24189	19348	6148	5556	6015	7267	7967	9014	7672	7581	na	na	na	na	na	na	na	na	na
P105H	2053	3065	na	1061	1216	1181	1418	1298	1048	11143	na	na	na	na	na	na	na	na	na	na	na	na	na	na	na	na	na	na	na	na	4802	4219	840	745	862	993	1174	1167	1209	1297	na	na	na	na	na	na	na	na	na
P105I	1149	1682	na	719	982	989	903	950	572	5063	na	na	na	na	na	na	na	na	na	na	na	na	na	na	na	na	na	na	na	na	2469	1535	481	478	722	659	673	793	615	585	na	na	na	na	na	na	na	na	na
P105K	4749	7261	na	3098	3911	3718	3915	4345	3812	30370	na	na	na	na	na	na	na	na	na	na	na	na	na	na	na	na	na	na	na	na	10106	8667	2866	2706	2926	3097	3324	3894	3496	3548	na	na	na	na	na	na	na	na	na
P105L	5088	7313	na	3084	4067	3344	3907	3818	4364	30991	na	na	na	na	na	na	na	na	na	na	na	na	na	na	na	na	na	na	na	na	11873	9404	3053	2674	3340	3333	3873	3762	3886	3852	na	na	na	na	na	na	na	na	na
P105M	1862	2680	na	1140	1513	1339	1672	1346	1355	11683	na	na	na	na	na	na	na	na	na	na	na	na	na	na	na	na	na	na	na	na	4025	2363	1100	939	980	1298	1378	1482	1385	1282	na	na	na	na	na	na	na	na	na
P105N	3863	5060	na	2191	2995	3189	2755	3390	2614	23006	na	na	na	na	na	na	na	na	na	na	na	na	na	na	na	na	na	na	na	na	8159	6737	1932	1767	2094	2448	2725	2819	2595	2497	na	na	na	na	na	na	na	na	na
P105Q	1265	2001	na	824	1026	879	1120	1329	1051	8389	na	na	na	na	na	na	na	na	na	na	na	na	na	na	na	na	na	na	na	na	2900	4717	643	667	530	757	922	963	1005	931	na	na	na	na	na	na	na	na	na
P105R	5020	7800	na	3316	4170	3611	4511	4679	4294	36958	na	na	na	na	na	na	na	na	na	na	na	na	na	na	na	na	na	na	na	na	11653	8874	3110	2854	3507	3579	3868	4362	3833	4097	na	na	na	na	na	na	na	na	na
P105S	3427	5195	na	2228	2735	2773	3288	2927	2474	20807	na	na	na	na	na	na	na	na	na	na	na	na	na	na	na	na	na	na	na	na	7518	8722	1658	1588	1638	1816	1965	2235	2021	1886	na	na	na	na	na	na	na	na	na
P105T	1696	2633	na	671	772	641	917	805	692	7160	na	na	na	na	na	na	na	na	na	na	na	na	na	na	na	na	na	na	na	na	3867	3374	456	396	428	441	576	635	592	660	na	na	na	na	na	na	na	na	na
P105V	4380	6615	na	2500	3378	2942	3387	3490	2713	25028	na	na	na	na	na	na	na	na	na	na	na	na	na	na	na	na	na	na	na	na	9589	8044	2540	2126	2756	2892	2904	3193	3230	2943	na	na	na	na	na	na	na	na	na
P105W	2179	3360	na	1454	1869	2238	1846	1763	1467	12594	na	na	na	na	na	na	na	na	na	na	na	na	na	na	na	na	na	na	na	na	5465	3794	1407	1106	1455	1641	1718	1779	1641	1686	na	na	na	na	na	na	na	na	na
[truncated: 1,133 more rows]
[truncated: 11 more columns]
