# Supplementary material for: Altered expression of a quality control protease in E. coli reshapes the in vivo mutational landscape of a model enzyme
Source: eLife. 2020 Jul 23;9:e53476. doi: 10.7554/eLife.53476 (PMC7377907; doi:10.7554/eLife.53476)
Supplement: Supplementary file 6. — For each mutant (column 1), three technical repeats are included (column 2). There are two lines for each repeat reaction, one for DHF concentration and one for the reaction velocity at that concentration (column 3). All data in columns 4+ are the experimental values. [file elife-53476-supp6.csv]

E154V	1	DHF	39.298183	38.677787	38.085194	37.483629	36.928413	36.304447	35.718083	35.110475	34.518744	33.928108	33.326429	32.731371	32.139824	31.558266	30.991987	30.388647	29.827579	29.280087	28.704207	28.125354	27.575278	27.041451	26.505610	25.970377	25.456707	24.933826	24.392562	23.908757	23.401066	22.899312	22.396344	21.917995	21.462252	20.975741	20.528499	20.073153	19.630713	19.183759	18.744578	18.317318	17.908077	17.480448	17.086642	16.676024	16.282514	15.905746	15.521858
E154V	1	velocity	6.661017	6.331260	6.652430	6.486184	6.525254	6.943196	6.750267	6.806063	6.772884	6.289805	6.374289	6.969168	6.966311	6.412672	6.488805	6.979709	6.235967	6.114911	5.690517	6.572325	6.195600	6.695504	6.458281	5.632164	5.289511	5.593944	5.491383	5.695173	5.222969	6.066703	5.479784	5.116615	5.339951	4.649286	5.069661	5.218364	4.976200	5.139845	4.988141	5.003529	4.807439	4.667907	4.508799	4.621725	4.209324	4.370592	4.060865
E154V	2	DHF	38.648587	38.144825	37.633215	37.144604	36.634769	36.133156	35.651626	35.099090	34.607288	34.071181	33.557674	33.047823	32.544117	32.031974	31.515255	31.020320	30.520594	30.023670	29.522082	29.021965	28.543100	28.048372	27.552949	27.053997	26.599730	26.136897	25.652354	25.197721	24.736850	24.267332	23.816126	23.390244	22.921382	22.482842	22.034971	21.611624	21.191929	20.761600	20.342898	19.903301	19.475026	19.060783	18.645708	18.253183	17.843567	17.451148	17.060322
E154V	2	velocity	11.709367	12.148102	9.837040	11.899741	11.733101	10.963286	10.787056	12.292027	11.678403	11.455447	12.331711	12.129347	11.861112	11.827900	11.726614	12.613883	11.051082	11.700027	11.688025	12.092086	10.992988	12.377250	10.889798	11.237780	10.506860	9.724746	9.788383	10.893460	10.198073	10.239780	10.791132	10.588585	9.849457	9.509776	10.647978	9.943539	10.299427	9.020011	10.644786	8.114378	9.323632	8.791701	9.556464	9.146844	9.289529	9.161951	8.957325
E154V	3	DHF	41.769717	41.313670	40.849350	40.360544	39.881782	39.418107	38.952262	38.477193	37.997119	37.485334	37.030543	36.521043	36.035184	35.575535	35.090626	34.633275	34.182746	33.709986	33.251684	32.806067	32.337604	31.887343	31.417233	30.968226	30.515847	30.077092	29.619122	29.177478	28.746448	28.323515	27.861730	27.433518	27.008085	26.582540	26.176402	25.746176	25.337223	24.945318	24.531910	24.144886	23.748296	23.346340	22.957512	22.579793	22.201962	21.823217	21.448226
E154V	3	velocity	11.028297	12.608054	12.146282	11.256660	10.947369	11.462431	10.809167	11.333738	11.328380	12.178008	10.004755	11.769576	10.536670	11.709215	10.650396	12.020105	11.877764	10.756736	11.502673	9.707425	11.937621	8.382497	10.978460	10.229848	9.985146	9.118624	10.842634	10.707088	9.761924	9.911015	10.225489	10.069902	9.687821	9.124804	10.136065	8.353159	9.386187	9.551559	8.219932	9.505463	9.930964	8.554927	8.804512	8.791200	8.818916	8.394251	8.357409
I41A	1	DHF	31.184055	30.259473	29.387765	28.478904	27.519292	26.546846	25.616615	24.636576	23.678342	22.748679	21.832908	20.927726	20.037116	19.173808	18.319262	17.482992	16.662552	15.871384	15.105498	14.361232	13.643683	12.944395	12.270005	11.613112	10.988423	10.383577	9.806371	9.244479	8.718525	8.214449	7.732887	7.278366	6.836315	6.420731
I41A	1	velocity	4.288490	4.162327	3.801405	4.058213	4.110527	4.417084	4.110680	4.596410	4.219745	4.182412	4.030549	3.897618	3.927045	3.855345	3.726484	3.635377	3.523197	3.474110	3.382412	3.195622	3.076968	3.051773	2.962294	2.877220	2.735694	2.707123	2.541437	2.374034	2.303399	2.150173	2.113365	1.932997	1.862434	1.851956
I41A	2	DHF	33.252435	32.290796	31.318182	30.345173	29.390898	28.385206	27.355950	26.363501	25.377140	24.415480	23.483696	22.571258	21.666693	20.778397	19.908321	19.069023	18.243831	17.441806	16.660056	15.890486	15.165874	14.458306	13.768489	13.110726	12.470920	11.853768	11.265367	10.700676	10.152256	9.629917	9.129144	8.653220	8.199583
I41A	2	velocity	4.319904	4.745359	4.447754	4.116097	4.475614	4.826854	4.582371	4.527187	4.311601	4.191339	4.283011	4.155029	4.088053	3.991083	3.932393	3.783238	3.665223	3.626555	3.521050	3.423673	3.294750	3.194519	3.115899	3.044719	2.903929	2.785795	2.676341	2.569385	2.456757	2.334777	2.263001	2.108669	1.961727
I41A	3	DHF	28.720165	27.301698	25.909396	24.488280	23.092097	21.708274	20.321354	18.992544	17.681384	16.397776	15.157367	13.974313	12.853059	11.798081	10.803167	9.876592	9.015856	8.206481	7.441241	6.734551	6.103553	5.523485	4.991792
I41A	3	velocity	7.009433	6.527371	6.586625	6.667446	6.293907	6.654855	6.290788	6.181017	6.135045	5.913197	5.657728	5.380415	5.060662	4.812001	4.518170	4.106551	3.912997	3.702288	3.437957	3.062262	2.873774	2.566427	2.323957
M42F	1	DHF	29.915113	28.558915	27.266319	26.028109	24.847614	23.707921	22.594119	21.530539	20.496694	19.486385	18.506662	17.557815	16.630515	15.729900	14.859212	14.016584	13.195297	12.412683	11.651936	10.911602	10.205534	9.515247	8.851755	8.219056	7.604913	7.022536	6.460840	5.929891
M42F	1	velocity	6.277098	5.970919	5.673059	5.520873	5.269373	5.156151	4.852949	4.790643	4.763756	4.539176	4.369758	4.255144	4.111883	3.949501	3.820397	3.709833	3.705812	3.456578	3.417310	3.238945	3.176758	3.029019	2.971871	2.869151	2.758772	2.626041	2.450408	2.338422
M42F	2	DHF	47.315451	45.757497	44.182061	42.618275	41.009634	39.451972	37.865282	36.324046	34.795134	33.280256	31.820068	30.376175	28.976823	27.604155	26.282332	24.977944	23.730549	22.516377	21.318924	20.171274	19.060096	17.994792	16.968865	15.989159	15.048701	14.151090	13.293005	12.483893	11.704068	10.969261	10.270406	9.612833
M42F	2	velocity	7.185531	6.938490	7.172466	7.219036	7.199236	6.999697	7.194738	6.843044	6.826282	6.700092	6.658695	6.599649	6.390674	6.080276	5.897081	5.917611	5.581597	5.411559	5.276638	5.154057	4.914091	4.867014	4.581307	4.418416	4.167270	3.875559	3.797567	3.627143	3.442469	3.261225	3.060938	2.948489
M42F	3	DHF	56.412524	54.429445	52.476986	50.458904	48.365565	46.275570	44.199768	42.163479	40.143248	38.167668	36.211880	34.305894	32.435471	30.620652	28.874500	27.200854	25.603011	24.080086	22.622186	21.243982	19.957017	18.725073	17.559967	16.471700	15.460276	14.503792	13.606155	12.773780	11.999129	11.273396	10.596556	9.971243	9.383608
M42F	3	velocity	8.785712	8.741593	8.756883	9.189729	9.433176	9.329314	9.252430	9.012128	8.806154	8.572194	8.602653	8.278426	8.148652	7.899312	7.628075	7.296060	6.987302	6.647698	6.285866	5.926935	5.686127	5.355688	4.979754	4.745562	4.343787	4.146813	3.854936	3.533220	3.289257	3.121474	2.819958	2.751401	2.557471
L62V	1	DHF	26.763532	25.455313	24.139109	22.787443	21.390511	19.990944	18.643785	17.345109	16.135825	14.894560	13.637379	12.385155	11.168838	10.003483	8.879452	7.814622	6.823677	5.902987
L62V	1	velocity	3.882087	3.952455	3.965483	4.103562	4.228122	4.026738	3.994789	3.614376	3.639185	3.674577	3.780569	3.624709	3.559110	3.416724	3.239776	3.064329	2.836877	2.602008
L62V	2	DHF	46.861429	46.421951	45.982656	45.534033	45.093386	44.664754	44.256676	43.828478	43.339307	42.849400	42.416675	41.971146	41.544114	41.087900	40.608649	40.089281	39.594319	39.088064	38.589109	38.077610	37.557878	37.075671	36.531076	36.051173	35.553758	35.020100	34.522625	34.017879	33.507535	32.991486	32.478638	31.991528	31.467086	30.981611	30.475306	29.974284	29.474036	28.976451	28.508859	28.031672	27.537630	27.069783	26.602770	26.146339	25.687738	25.231393	24.767832
L62V	2	velocity	3.152982	3.132056	2.906758	3.000970	2.812751	3.050917	2.839285	3.101540	3.214281	2.890861	3.464421	2.779359	2.797401	3.653003	3.347586	3.184770	3.595140	3.507275	3.484744	4.031954	2.886046	3.354245	3.415317	3.361227	3.255590	3.491890	3.279117	3.451421	3.679141	3.491707	3.588005	3.362824	3.172540	3.473091	3.144024	3.372400	3.091894	3.025461	3.399767	2.886522	3.350772	3.285041	3.277948	2.778943	3.531617	2.824358	3.097611
L62V	3	DHF	40.355296	39.855260	39.294227	38.734065	38.209874	37.634932	37.109293	36.542292	35.975661	35.436946	34.919194	34.339843	33.784252	33.229767	32.650241	32.092464	31.516912	30.987890	30.428302	29.896238	29.351164	28.819771	28.276445	27.743161	27.239366	26.717092	26.208200	25.701039	25.187254	24.691279	24.207356	23.711496	23.224485	22.766176	22.296040	21.833406	21.385793	20.927268	20.496865	20.057931	19.622639	19.194902	18.789142	18.374755	17.964192	17.581524	17.183144
L62V	3	velocity	3.690239	3.571284	3.685904	3.933895	3.763152	3.933406	3.703423	4.016529	3.609139	3.353458	3.435732	3.666008	3.753182	3.837625	3.708275	3.588104	3.587827	3.594738	3.677442	3.292371	3.595724	3.385323	3.662287	3.433253	3.501428	3.418128	3.444268	3.110074	3.245221	3.229892	3.233091	3.236408	3.163649	3.206437	2.975592	2.893237	2.884526	2.894784	2.833932	2.967968	2.899001	2.737222	2.757977	2.483568	2.655976	2.563798	2.510816
L62V	4	DHF	38.870374	37.540000	36.215983	34.912527	33.563869	32.212386	30.860630	29.506841	28.180368	26.873117	25.590695	24.347672	23.128921	21.935323	20.752889	19.606829	18.490484	17.396849	16.346782	15.343235	14.370542	13.442833	12.545350	11.694262	10.887493
L62V	4	velocity	3.861026	3.920600	3.861304	3.802577	3.975502	3.991284	4.055755	4.022728	3.880429	3.761882	3.750623	3.677802	3.604283	3.564373	3.366598	3.317815	3.293469	3.154396	3.107852	2.948599	2.764821	2.694949	2.534403	2.435423	2.265075
C85L	1	DHF	59.289061	57.707252	56.043448	54.383196	52.785850	51.150533	49.550520	47.995726	46.392939	44.795472	43.157630	41.566805	39.988207	38.421177	36.910459	35.424279	33.962317	32.551206	31.179357	29.834525	28.549590	27.295316	26.090489	24.934513	23.823839	22.750108	21.713872	20.737355	19.779279	18.869476	18.003372
C85L	1	velocity	7.592004	8.201501	8.385755	7.705264	7.922763	7.958500	7.763523	7.490102	7.891417	7.912285	7.983219	7.817910	7.700734	7.554979	7.362365	7.160778	7.091358	6.824664	6.585084	6.477673	6.078722	5.941676	5.769100	5.479830	5.348904	5.096977	4.876869	4.728214	4.462502	4.302038	4.226822
C85L	2	DHF	41.009438	39.753391	38.515273	37.224565	36.040233	34.908242	33.761499	32.633030	31.471769	30.323011	29.128070	27.903629	26.692559	25.501996	24.362909	23.257869	22.186768	21.144966	20.101271	19.104870	18.122314	17.167680	16.249617	15.357533	14.509084	13.687791	12.896740	12.133252	11.410924	10.716121
C85L	2	velocity	5.822626	6.029990	6.056573	6.286583	5.558286	5.672251	5.294649	5.545363	5.524357	5.745283	5.871258	6.017528	5.920281	5.696310	5.363170	5.419984	5.304109	5.249077	4.912086	4.840468	4.742224	4.488192	4.415084	4.209193	4.001043	4.083045	3.781638	3.651906	3.482871	3.248033
C85L	3	DHF	33.476338	32.454474	31.402932	30.352517	29.288864	28.323871	27.297109	26.204137	25.061727	23.951038	22.824993	21.755829	20.737500	19.759133	18.746478	17.709755	16.676460	15.671501	14.710647	13.782427	12.888019	12.021823	11.200076	10.425060	9.675487
C85L	3	velocity	5.092280	4.714001	4.911101	5.168863	5.189081	4.770495	5.216495	5.476872	5.537711	5.569586	5.406121	5.091242	4.828060	4.880090	5.114600	5.014674	4.882827	4.836442	4.511605	4.482529	4.242627	4.185703	3.821744	3.619367	3.559485
R98Y	1	DHF	54.347689	53.422364	52.446964	51.517252	50.557963	49.599569	48.557431	47.537218	46.532881	45.544811	44.551674	43.538618	42.528340	41.509231	40.475724	39.479663	38.523679	37.557640	36.601652	35.673452	34.735604	33.823237	32.907865	32.024149	31.144303	30.279591	29.427000	28.599611	27.782773	26.988260	26.212982	25.445559	24.700129	23.964994	23.246981	22.545444	21.860904	21.188531	20.542140	19.911578	19.299619	18.695747	18.112504	17.536207	16.983478	16.448096	15.926521
R98Y	1	velocity	4.408241	4.843276	4.148042	4.678667	4.625363	4.915285	5.183845	4.929241	4.800994	4.973887	5.100765	4.849285	5.035749	4.978857	4.842249	4.731722	4.615638	4.562349	4.632890	4.563123	4.660303	4.446976	4.379479	4.280461	4.228281	4.164144	4.168202	4.001103	3.955743	3.905487	3.763063	3.621183	3.652910	3.562841	3.579014	3.421858	3.280128	3.183143	3.263154	3.059100	2.976963	2.832392	2.833763	2.762696	2.661143	2.629280	2.512646
R98Y	2	DHF	40.398889	39.627041	38.850761	38.071954	37.271187	36.445607	35.622547	34.794835	33.963978	33.078345	32.219308	31.388252	30.548532	29.721391	28.898712	28.078454	27.250934	26.461250	25.645695	24.864026	24.081093	23.318814	22.566326	21.838296	21.108175	20.398882	19.710607	19.032036	18.379976	17.721366	17.101690	16.484079	15.896135	15.310469	14.754994	14.216975	13.680195	13.165271	12.669513	12.196780	11.736214	11.282062	10.848967	10.430801	10.021973
R98Y	2	velocity	4.142778	3.752783	3.753232	3.789346	3.954955	4.219831	3.834955	4.025590	4.158520	4.172783	4.233328	4.072505	4.061019	3.953077	3.996778	3.974949	4.034206	3.778068	3.802889	3.876398	3.956735	3.675919	3.802715	3.685990	3.433341	3.384587	3.323675	3.292233	3.077211	3.208831	2.955663	3.005438	2.822190	2.729925	2.839717	2.687715	2.683538	2.457126	2.276546	2.240348	2.145053	2.205515	2.158842	2.033507	1.898837
R98Y	3	DHF	29.222563	28.127286	27.056972	26.027274	24.983861	23.903526	22.826646	21.743188	20.665028	19.606641	18.538741	17.523868	16.546171	15.578503	14.629895	13.721245	12.822451	11.962696	11.125287	10.322012	9.562030	8.831788	8.142966	7.490619	6.865118	6.278495	5.725822
R98Y	3	velocity	5.403992	5.354439	5.099007	4.987369	5.164028	5.193736	5.390139	5.322125	5.246094	5.163904	5.008663	4.817962	4.793166	4.626635	4.599706	4.372899	4.384355	4.073736	3.917993	3.755080	3.597099	3.439781	3.268714	3.153801	3.017873	2.853293	2.705328
L156Y	1	DHF	26.396131	25.776856	25.126879	24.498940	23.855256	23.215922	22.543472	21.876314	21.239353	20.572504	19.909438	19.278982	18.629224	17.954863	17.274999	16.606961	15.941840	15.252704	14.583946	13.929462	13.268369	12.622952	11.993263	11.378426	10.764164	10.146815	9.549637	8.963253	8.395906	7.851990	7.308271	6.790472	6.293614	5.811812
L156Y	1	velocity	8.578132	8.109511	8.457391	7.949600	8.052505	7.641408	8.775733	8.034110	8.205945	8.767816	8.621296	8.571499	8.436414	8.282233	8.964902	8.073706	9.069881	8.502771	9.067196	8.384589	8.357857	8.306072	8.190457	8.130368	7.697777	7.634197	7.663399	7.563077	7.387338	7.168574	6.934432	6.325517	6.606207	6.154529
L156Y	2	DHF	34.510249	33.911497	33.323537	32.722902	32.118774	31.513481	30.855062	30.209229	29.573072	28.936329	28.275467	27.589496	26.924621	26.279651	25.632976	24.968206	24.307692	23.637116	22.971493	22.300821	21.635441	20.976286	20.318617	19.686187	19.032967	18.412696	17.775964	17.150679	16.544985	15.947845	15.351050	14.768713	14.220269	13.648101	13.108430	12.572820	12.041304	11.532504	11.025867	10.541412	10.056328	9.582864	9.101426	8.656704	8.201774	7.776564
L156Y	2	velocity	7.922971	8.214354	7.383188	8.144309	7.922745	8.161467	8.461780	7.781090	8.364581	8.926058	8.897643	8.458399	8.170022	8.918968	8.644407	8.082479	8.530389	9.101659	8.928780	8.445984	8.589851	8.861190	8.087469	8.482103	8.355510	8.390345	7.754263	8.545177	7.429073	7.641935	7.166252	7.357455	7.418375	6.889654	7.214065	6.895781	6.770672	6.827225	6.153567	6.185833	6.138569	6.125615	6.023094	5.510334	5.609452	5.607757
L156Y	3	DHF	47.109495	45.939719	44.769358	43.570623	42.378518	41.162021	39.961892	38.777847	37.617100	36.425170	35.275315	34.117336	32.973783	31.851873	30.744090	29.665266	28.604769	27.561227	26.517989	25.503632	24.530513	23.556846	22.608360	21.691466	20.784857	19.894325	19.046783	18.209604	17.410817	16.628620	15.873171	15.152273	14.446368
L156Y	3	velocity	7.403499	7.464475	7.705504	7.671914	8.002761	7.727560	7.596657	7.066099	7.530314	7.590246	7.581660	7.248312	7.128713	7.064798	6.804861	6.807494	6.670527	6.536160	6.354791	6.329606	6.282771	6.239302	5.873878	6.060950	5.554803	5.466744	5.528597	5.293242	4.961967	4.922975	4.695001	4.379659	4.467512
Q102L	1	DHF	30.225761	29.656917	29.046080	28.431740	27.808401	27.161220	26.526447	25.882316	25.235188	24.576604	23.924545	23.260487	22.596481	21.939518	21.275666	20.628992	19.990092	19.357912	18.733237	18.119748	17.520190	16.922752	16.334621	15.771722	15.191515	14.643689	14.107018	13.574455	13.057945	12.549065	12.062463	11.578526	11.110877	10.657832	10.211883	9.787196	9.364968	8.957587	8.563430	8.183027	7.818429
Q102L	1	velocity	2.666259	2.812127	2.947578	3.119032	3.080592	2.902770	3.109826	3.093590	3.038184	3.029646	3.201557	3.160453	3.147514	3.135163	2.945745	3.092848	3.070740	3.023576	2.848285	2.875366	2.829373	2.779789	2.821190	2.694031	2.533867	2.561898	2.588134	2.541372	2.433362	2.334221	2.309881	2.169399	2.090413	2.154906	2.034630	2.022925	2.014024	1.969170	1.897038	1.670700	1.655588
Q102L	2	DHF	47.953856	47.358753	46.734351	46.149372	45.538344	44.936996	44.341867	43.723538	43.130936	42.502589	41.891106	41.275742	40.658380	40.034037	39.414437	38.808404	38.194655	37.573438	36.974339	36.377641	35.754590	35.173614	34.581550	33.997333	33.422159	32.848438	32.275764	31.716635	31.176227	30.636193	30.110166	29.565980	29.064071	28.546424	28.041977	27.556281	27.060613	26.581492	26.101627	25.635559	25.182250	24.730842	24.283531	23.846051	23.427198	22.993329	22.585815
Q102L	2	velocity	2.948843	2.930103	2.789891	2.783089	2.699763	2.942895	2.844198	2.695449	3.041864	2.889919	3.078244	2.948633	3.102377	2.871631	2.792445	2.738106	2.896924	2.867776	2.921663	2.798703	2.665370	3.009484	2.669902	2.725431	2.762796	2.624638	2.705816	2.576599	2.686432	2.527824	2.476342	2.411239	2.329127	2.422197	2.367257	2.388018	2.289318	2.343475	2.235114	2.331010	2.311043	2.044498	2.118577	2.044512	1.940519	2.053571	2.082996
Q102L	3	DHF	36.527861	35.893001	35.266857	34.612595	33.954584	33.313900	32.665513	32.011818	31.346634	30.711515	30.044249	29.395820	28.718536	28.073409	27.407035	26.730167	26.057147	25.404427	24.733418	24.090001	23.443133	22.814906	22.184222	21.566230	20.945189	20.363246	19.771525	19.185804	18.614538	18.069962	17.528299	16.996288	16.477836	15.974191	15.470847	14.993458	14.519789	14.059294	13.615324	13.179388	12.755434	12.349395	11.952542	11.561986	11.187435	10.818791	10.456765
Q102L	3	velocity	3.226368	2.774968	3.081189	3.320589	3.085083	2.917162	2.922952	3.172776	3.001028	3.094840	3.080631	3.252558	2.963215	3.287807	3.192914	3.153458	3.102584	3.252648	3.106000	3.139165	3.121586	3.013431	3.073299	2.966002	3.003383	2.836638	2.851117	2.705397	2.650140	2.474947	2.566157	2.484475	2.564563	2.509119	2.409526	2.353142	2.172918	2.250367	2.065300	2.095972	1.858100	1.980946	1.869155	1.743701	1.837762	1.673658	1.875605
H45S	1	DHF	44.834373	43.639603	42.422750	41.158664	39.884774	38.635850	37.401929	36.181078	34.994887	33.852864	32.700303	31.563864	30.458297	29.365826	28.315335	27.255624	26.233688	25.248907	24.278576	23.338569	22.432766	21.549845	20.691533	19.850877	19.045044	18.259857	17.507520	16.757661	16.040201	15.340353	14.666502	14.015398	13.390615	12.788167	12.204710	11.650178
H45S	1	velocity	5.370340	5.455393	5.465193	5.786827	5.716959	5.652323	5.811535	5.458802	5.195378	5.277198	5.267710	5.030512	5.012273	4.928773	4.802168	4.590266	4.469290	4.385493	4.389208	4.296920	4.115552	4.002366	3.880049	3.632683	3.703375	3.572015	3.492652	3.322461	3.145927	3.094401	3.025702	2.885083	2.732783	2.700937	2.505588	2.491360
H45S	2	DHF	42.303458	41.104107	39.916175	38.732632	37.549837	36.358018	35.092540	33.824327	32.581461	31.381267	30.197106	29.038914	27.906955	26.849703	25.866152	24.941776	23.923036	22.755495	21.622425	20.666944	19.740377	18.854752	17.963253	17.122747	16.303573	15.519022	14.766709	14.026704	13.308595	12.622168	11.965956	11.326987	10.718868
H45S	2	velocity	5.464402	5.491240	5.401380	5.236129	5.166744	5.739594	5.932859	5.774566	5.598325	5.473664	5.158079	5.198480	5.008156	4.708878	4.336703	4.319889	4.968758	5.624860	4.544819	4.270784	4.070778	3.887416	3.967644	3.907869	3.668247	3.618986	3.370554	3.328970	3.168620	2.964207	3.010955	2.731327	2.678089
H45S	3	DHF	35.271918	34.529011	33.806208	32.977937	32.130271	31.257300	30.409809	29.581063	28.776209	27.965168	27.154257	26.354564	25.571071	24.784959	24.004882	23.229288	22.451834	21.697199	20.941889	20.194419	19.460999	18.730370	18.030262	17.336255	16.660000	15.995477	15.343268	14.717240	14.103746	13.515605	12.933967	12.377105	11.835672	11.318588	10.810266	10.325426	9.858619	9.413528	8.981110	8.568425
H45S	3	velocity	3.855180	3.007166	3.588526	3.733906	3.770590	4.051279	3.757236	3.767621	3.648979	3.671377	3.674914	3.609190	3.590590	3.490469	3.453662	3.550377	3.635357	3.387549	3.316153	3.362980	3.203805	3.076514	3.186735	3.118183	2.978343	2.937526	2.924280	2.769772	2.722098	2.678827	2.631708	2.507804	2.341613	2.307033	2.247485	2.121468	2.122609	2.071492	2.114742	1.838838
I91G	1	DHF	48.025398	46.511912	44.910679	43.364484	41.860330	40.365771	38.905212	37.495820	36.088785	34.661042	33.252621	31.860141	30.518878	29.213702	27.931315	26.682668	25.467888	24.294563	23.154666	22.033990	20.941407	19.890497	18.873327	17.883248	16.942922	16.039029	15.166686	14.342337	13.533902	12.776555	12.054050	11.363873	10.712359	10.093982	9.496926	8.937335
I91G	1	velocity	10.703742	11.787599	11.864855	11.192878	10.894699	10.938876	10.904941	10.375894	10.587676	10.649725	9.795979	10.069586	9.960417	9.553536	9.118380	9.328332	8.752763	8.414957	8.289687	7.933397	7.896093	7.900550	7.402446	7.059693	6.611508	6.517720	6.234633	6.147728	5.896998	5.629702	5.167340	4.769541	4.572097	4.506366	4.231871	3.892558
I91G	2	DHF	41.850683	40.490680	39.108963	37.727022	36.309587	34.908198	33.425646	31.924635	30.461648	29.027475	27.637218	26.263201	24.936516	23.657340	22.403397	21.200986	20.008565	18.861306	17.754156	16.687438	15.644210	14.678274	13.725969	12.837773	11.982407	11.170376	10.387569	9.652659	8.953793
I91G	2	velocity	10.499868	9.940948	9.574470	10.937815	10.504448	10.834594	11.096057	10.954208	10.825983	10.622831	9.825688	9.845333	9.750525	9.701591	9.157361	8.903146	8.712874	8.197827	7.858670	7.699515	7.337116	7.000379	7.247949	6.372998	6.185407	5.995155	5.723112	5.385034	4.979399
I91G	3	DHF	34.175309	33.200930	32.246737	31.278848	30.331884	29.470787	28.689352	27.926185	27.146983	26.354456	25.498777	24.636735	23.794579	22.993370	22.234240	21.501851	20.762606	20.036117	19.306770	18.585500	17.902973	17.231432	16.584585	15.962759	15.383256	14.802449	14.268344	13.736580	13.237682	12.760950	12.295568	11.850187	11.431016	11.011248	10.622652
I91G	3	velocity	7.414576	6.752912	7.275982	7.074885	6.877254	6.065273	5.566604	5.911813	5.883021	6.178652	6.387133	6.414911	6.064990	5.694818	5.699998	5.314801	5.601583	5.420585	5.111063	5.198610	5.040892	4.794791	4.619012	4.528860	4.195911	4.025682	4.026937	3.750804	3.587632	3.594803	3.349535	3.222832	3.109143	2.929098	2.809422
Q102W	1	DHF	43.401588	42.981342	42.568531	42.148915	41.748447	41.367596	40.933892	40.535900	40.136930	39.712611	39.298969	38.904936	38.497857	38.092625	37.692816	37.273156	36.863358	36.471708	36.067157	35.683024	35.301463	34.895889	34.522727	34.138987	33.775156	33.403841	33.032345	32.657186	32.308907	31.951399	31.601028	31.237519	30.894213	30.576114	30.212436	29.897791	29.558953	29.252314	28.918584	28.598214	28.308767	28.020880	27.740473	27.490673	27.239355	27.032336	26.823942
Q102W	1	velocity	2.230041	2.207480	2.480256	1.943114	2.073686	2.151522	2.051388	2.143363	2.351524	1.905909	2.331580	1.849489	2.289136	2.252985	1.931851	2.193485	2.283166	1.910884	1.942166	2.031581	2.189095	2.065323	1.941961	2.190492	2.000352	2.258015	1.839201	1.546524	2.062478	1.790113	1.675196	1.893996	1.645018	2.021129	1.823179	1.932169	1.354703	1.820402	1.396255	1.673749	1.795154	1.452794	1.396174	1.558447	0.969898	0.939788	1.009275
Q102W	2	DHF	32.264116	31.761439	31.254321	30.746198	30.230267	29.702022	29.172069	28.665711	28.143339	27.615109	27.078740	26.556936	26.022863	25.497379	24.982108	24.462967	23.959386	23.454328	22.955137	22.472839	21.984493	21.505751	21.033311	20.571388	20.099171	19.659307	19.216643	18.781129	18.343360	17.932281	17.520985	17.121932	16.721788	16.337520	15.961549	15.578221	15.216270	14.855112	14.487588	14.140959	13.789201	13.459401	13.114857	12.789592	12.466409	12.154848	11.882334
Q102W	2	velocity	2.874254	2.588443	2.862714	2.695049	2.966037	2.577675	2.667707	2.601686	2.743972	2.870941	2.800917	2.773883	2.628902	2.571553	2.587227	2.554393	2.566743	2.604771	2.587936	2.522451	2.484581	2.560432	2.414508	2.598891	2.227615	2.440934	2.400493	2.233730	2.239426	2.122303	2.147860	2.212697	2.062358	2.013277	1.972312	1.890921	1.917813	1.859504	1.725242	1.869594	1.876991	1.875779	1.765144	1.703200	1.690202	1.485414	1.430959
Q102W	3	DHF	31.066859	30.559266	30.088657	29.639871	29.225359	28.755124	28.271414	27.773407	27.291438	26.767432	26.264254	25.756751	25.244543	24.737810	24.239990	23.732521	23.229500	22.724550	22.217089	21.724779	21.240675	20.741891	20.273210	19.799894	19.334874	18.888592	18.421644	17.974257	17.539710	17.095214	16.669688	16.242430	15.833744	15.425569	15.023718	14.637696	14.246452	13.867851	13.497128	13.138919	12.779158	12.431372	12.084310	11.753950	11.429244	11.103851	10.803216
Q102W	3	velocity	2.730401	2.638695	2.280542	2.357352	2.342790	2.540078	2.626669	2.541387	2.662318	2.638442	2.632133	2.627580	2.549457	2.779031	2.648606	2.625023	2.468262	2.668297	2.740575	2.648809	2.473639	2.534306	2.510117	2.524834	2.469565	2.361424	2.339236	2.358592	2.335132	2.189007	2.250487	2.273074	2.136444	1.929714	2.115717	2.174949	2.105141	1.974489	1.924736	1.883886	2.038169	1.776756	1.764975	1.738463	1.762820	1.588152	1.590984
I91A	1	DHF	43.341796	42.210807	41.044365	39.859765	38.658876	37.440070	36.205683	35.004255	33.781978	32.563681	31.370079	30.182122	29.016910	27.869431	26.758748	25.658198	24.595018	23.541824	22.508906	21.487831	20.488149	19.507021	18.559262	17.627773	16.732184	15.867272	15.024058	14.212026	13.429431	12.676381	11.960913	11.282444	10.633860	10.006731	9.411378	8.852170
I91A	1	velocity	8.515635	8.393056	8.427205	8.753088	9.060981	9.294988	8.894591	9.135341	8.890138	8.771966	8.747383	8.703065	8.631242	8.431444	8.134243	8.091166	7.778324	7.596385	7.201564	7.582658	7.357880	7.150003	6.995913	6.815936	6.406751	6.578905	6.268057	5.791074	5.664701	5.279210	5.104241	5.024883	4.757180	4.407863	4.413805	4.121213
I91A	2	DHF	37.207730	35.968680	34.691314	33.417256	32.114295	30.820467	29.514698	28.233091	26.956536	25.689735	24.453340	23.237428	22.033166	20.865939	19.732474	18.596249	17.504505	16.440537	15.429753	14.435030	13.471145	12.560763	11.676129	10.832145	10.019301	9.247479
I91A	2	velocity	9.038513	8.948363	9.245959	9.493983	9.609488	9.502902	9.585307	9.484061	9.378888	9.200089	9.170772	9.244502	8.590645	8.701597	8.187187	8.109499	7.872032	7.698450	7.356584	7.165980	6.788871	6.734552	6.140235	5.996098	6.000972	5.585696
I91A	3	DHF	34.023304	32.875745	31.752960	30.602630	29.458813	28.296242	27.097029	25.870861	24.623887	23.398983	22.167271	20.968359	19.795422	18.664702	17.578762	16.511381	15.478877	14.490515	13.546570	12.649574	11.793977	10.979487	10.193884
I91A	3	velocity	8.788746	8.263920	8.475070	8.365690	8.545827	8.571204	9.196014	9.200253	9.279465	8.962744	8.867357	8.968641	8.549415	8.272389	8.115775	7.893543	7.332216	7.108682	6.848979	6.486859	6.083409	5.923835	5.679362
T113V	1	DHF	27.498757	26.678266	25.877003	25.136833	24.428255	23.845070	23.162218	22.461975	21.864212	21.295985	20.725069	20.161099	19.625579	19.096405	18.607161	18.118883	17.636507	17.183903	16.748605	16.345990	15.935535	15.546957	15.168623	14.812883	14.453937	14.115028	13.779615	13.453672	13.131447	12.829083	12.533848	12.240925	11.966915	11.696410	11.434713	11.182794	10.943923	10.709690	10.505565	10.287588	10.060414	9.828648	9.594340	9.389313	9.188784
T113V	1	velocity	3.626002	3.867913	3.411292	3.217825	3.180449	2.165825	3.953968	2.638142	2.730612	2.591985	2.583458	2.446233	2.350554	2.289402	2.278959	2.223782	2.156904	1.990487	1.910080	1.849398	1.781683	1.789202	1.679491	1.577438	1.590688	1.547816	1.451950	1.404798	1.334401	1.303831	1.251664	1.259035	1.271183	1.243437	1.236314	1.150542	1.102575	1.010593	1.064250	1.014819	0.956353	1.132214	1.039659	0.899015	0.795081
T113V	2	DHF	44.401193	42.781616	41.221537	39.743242	38.344868	37.003791	35.731963	34.499157	33.311428	32.203896	31.162429	30.153854	29.163462	28.216455	27.308861	26.416990	25.601380	24.819296	24.054051	23.332383	22.628845	21.962301	21.312271	20.703065	20.108101	19.540280	18.998828	18.468585	17.979085	17.486376	17.016759	16.559143	16.104288	15.675164	15.262534	14.845679	14.446583	14.066014	13.690519	13.322771	12.969401	12.631182	12.292934	11.968849	11.649903	11.342623	11.049195
T113V	2	velocity	7.142793	7.715743	6.712774	6.773925	6.141476	5.969829	5.775238	5.489005	5.208911	4.909805	4.533743	4.635142	4.441633	4.113109	4.035598	3.997940	3.573139	3.374843	3.169763	3.249413	3.049353	3.109517	2.965974	2.823673	2.529135	2.581892	2.430341	2.276358	2.218437	2.233551	2.138503	1.993524	2.005081	2.016154	1.932680	1.886507	1.853218	1.759074	1.565672	1.551532	1.677943	1.543066	1.496738	1.524101	1.454832	1.300400	1.305763
T113V	3	DHF	49.127231	47.962449	46.802520	45.730640	44.745445	43.788959	42.729078	41.716132	40.817416	39.954874	39.063049	38.181635	37.400191	36.616472	35.850191	35.099737	34.389798	33.691272	33.009953	32.376350	31.749596	31.155929	30.563966	29.971873	29.399712	28.844332	28.292149	27.759730	27.242803	26.738889	26.225535	25.733831	25.258523	24.775485	24.313178	23.862782	23.419161	22.975973	22.545899	22.129212	21.716250	21.311811	20.919032	20.527632	20.142774	19.787224	19.411925
T113V	3	velocity	5.479276	5.784679	4.937410	4.672409	4.222165	4.640353	4.795864	4.339417	3.815156	3.996765	3.855320	3.772155	3.482271	3.589645	3.642610	3.292895	3.255747	3.003775	3.018800	3.055639	2.817163	2.772834	2.692934	2.472052	2.469375	2.736686	2.527342	2.342938	2.406435	2.374070	2.182787	2.087691	2.131901	2.074860	1.956186	2.100979	1.938456	2.002792	1.921596	1.957416	1.808134	1.686582	1.801253	1.673578	1.705220	1.644065	1.566719
T113V	4	DHF	34.836341	33.720024	32.589912	31.468592	30.460585	29.516736	28.608946	27.777220	27.002685	26.233444	25.463806	24.738456	24.065621	23.433261	22.805895	22.195850	21.610101	21.033660	20.470508	19.905573	19.365303	18.843958	18.328056	17.825419	17.321691	16.841989	16.370356	15.908660	15.457679	15.026808	14.588878	14.187408	13.768041	13.373349	13.003908	12.633257	12.274469	11.916666	11.581676	11.257420	10.947451	10.634216	10.330834	10.037888	9.753509	9.475586	9.223034
T113V	4	velocity	5.330345	5.199510	5.271627	4.809677	4.433206	4.268732	4.018057	3.555066	3.526568	3.526947	3.401457	3.062932	2.963882	2.937965	2.711088	2.669615	2.723352	2.720091	2.496039	2.580429	2.453669	2.456373	2.162246	2.285677	2.298962	2.053485	2.101844	2.025443	2.096584	1.965146	1.835167	1.847948	1.833839	1.788677	1.745515	1.578264	1.670142	1.541716	1.502438	1.424818	1.514216	1.401335	1.354235	1.267493	1.340839	1.130688	1.251115
W30F	1	DHF	34.477379	33.142050	31.786111	30.416663	29.099595	27.788619	26.498310	25.220111	23.971355	22.749101	21.575069	20.432308	19.340199	18.286015	17.275234	16.308920	15.388398	14.514427	13.674103	12.892262	12.145387	11.425240	10.755808	10.119185	9.520358	8.963146	8.434720	7.930687	7.456428
W30F	1	velocity	9.955866	9.970652	10.049457	9.847046	9.608703	9.710854	9.272848	9.470919	9.255835	8.934659	8.546939	8.255829	7.982259	7.479489	7.231601	6.842656	6.638888	6.225647	5.953356	5.604606	5.470442	5.106362	4.869421	4.594142	4.337140	3.991933	3.909596	3.624565	3.355991
W30F	2	DHF	36.320310	35.573234	34.811654	34.091952	33.382002	32.680547	31.916843	31.137538	30.359110	29.577002	28.812928	28.071030	27.325080	26.563646	25.813488	25.083698	24.336575	23.623758	22.912768	22.212213	21.545973	20.888996	20.238514	19.625836	19.019177	18.434093	17.861710	17.313886	16.764801	16.242391	15.735440	15.240344	14.754938	14.284262	13.838262	13.403172	12.981566	12.571476	12.176858	11.795552	11.428153	11.062633	10.711225	10.380477
W30F	2	velocity	9.894569	10.121266	10.143168	9.595698	9.165783	9.619173	9.792962	9.979654	9.698595	10.586089	9.845140	9.896641	10.064383	9.589817	9.788161	9.772590	9.623553	9.735995	9.446212	9.162985	9.220376	8.634050	8.222927	8.353612	8.195400	7.420804	7.582111	7.157819	6.881229	6.869542	6.901398	6.529820	6.386820	5.790263	5.841429	5.687726	5.848035	5.588105	5.090748	5.222657	4.378531	4.667322	4.332545	4.462000
W30F	3	DHF	41.523609	40.034725	38.570854	37.138479	35.719408	34.303511	32.904368	31.508330	30.157066	28.830128	27.536573	26.287121	25.070090	23.885002	22.735498	21.623354	20.558171	19.525787	18.545047	17.590886	16.682730	15.801870	14.969078	14.169498	13.399299	12.673185	11.972633	11.309825	10.665881	10.061229	9.477162	8.922893	8.401495	7.904055
W30F	3	velocity	10.829000	10.972357	10.711000	10.562495	10.594422	10.456348	10.049532	10.090717	9.826241	9.700776	9.366605	9.068048	8.936223	8.742935	8.381179	8.169161	7.655329	7.464766	7.257474	6.914256	6.593697	6.244423	5.975266	5.820053	5.539543	5.219911	5.064686	4.879277	4.565462	4.497542	4.148300	3.974495	3.809773	3.783511
W30F	4	DHF	42.496360	41.859508	41.212681	40.555681	39.862514	39.164819	38.470142	37.802029	37.134681	36.457917	35.774446	35.100385	34.441578	33.785356	33.126613	32.477290	31.831014	31.176918	30.549960	29.928053	29.301711	28.691385	28.083780	27.472807	26.890218	26.309065	25.726673	25.170112	24.615534	24.075281	23.542488	23.026378	22.526895	22.016954	21.528003	21.045747	20.585851	20.127274	19.694967	19.257670	18.841050	18.429112	18.029594	17.635707	17.259401	16.875867	16.517140
W30F	4	velocity	8.241219	8.484574	9.127571	8.468856	9.091418	9.228508	9.031967	8.905172	9.180928	9.772575	8.781445	9.106554	8.584481	8.723502	8.725323	8.912089	8.772416	8.752690	8.589368	7.995983	7.864793	7.864393	7.875032	8.070921	7.931314	7.454703	7.638452	7.288598	7.339620	6.938109	7.143561	6.530462	6.527827	6.863095	6.426811	6.308199	5.615422	5.827110	5.632992	5.431247	5.723367	5.365240	5.238183	5.410945	4.800517	5.095729	4.681144
D116I	1	DHF	31.615154	30.813898	29.982553	29.161451	28.367437	27.565341	26.783766	26.024146	25.274274	24.539502	23.757592	23.014271	22.257910	21.547818	20.844223	20.156736	19.431505	18.695181	17.956729	17.228792	16.501859	15.821438	15.121427	14.437611	13.763046	13.080030	12.424363	11.778751
D116I	1	velocity	9.065413	8.760208	9.759081	9.389646	8.505663	9.168625	9.273185	8.548371	8.017729	8.435750	9.034813	8.798325	8.760166	7.798612	7.757096	8.013535	8.076787	8.452295	8.242820	8.335205	7.798972	7.422562	7.570039	7.609220	7.552423	7.759797	7.411655	6.963645
D116I	2	DHF	55.345505	54.640894	53.949937	53.220780	52.488381	51.777023	51.044505	50.295483	49.576213	48.807808	48.053672	47.299951	46.551383	45.811399	45.035614	44.271383	43.508122	42.776344	42.013470	41.274135	40.524605	39.782220	39.073363	38.336415	37.616422	36.900210	36.191716	35.486496	34.770638	34.083573	33.404877	32.718137	32.046377	31.382097	30.725117	30.068052	29.431917	28.793095	28.160061	27.547512	26.932628	26.329540	25.738963	25.151145	24.575671	23.999509	23.443628
D116I	2	velocity	8.854339	8.415513	8.998797	8.014631	7.781480	8.337748	8.366998	8.098932	8.420416	7.918315	8.408701	8.312592	8.505577	8.448214	8.917787	9.475156	9.209816	9.081685	8.581756	8.135831	8.725479	8.635840	8.508007	7.815646	8.106572	8.310508	8.150306	7.936158	8.685027	7.964544	7.526545	7.785678	8.159823	7.333095	7.170313	7.195088	7.629924	6.855317	7.059399	7.472238	6.626109	6.419605	6.873002	6.923074	6.825142	6.150663	6.340479
D116I	3	DHF	33.477145	32.841075	32.158746	31.501394	30.824473	30.145934	29.494892	28.827686	28.147653	27.452688	26.814215	26.149790	25.484441	24.811435	24.142467	23.499988	22.859874	22.254583	21.623588	20.988929	20.357152	19.723678	19.118849	18.484989	17.868067	17.252379	16.644714	16.054152	15.458492	14.876487	14.281556	13.735130	13.174637	12.636024	12.112505	11.593829
D116I	3	velocity	7.492589	8.371689	8.107073	7.713174	7.967358	8.294472	7.055414	7.228263	7.568585	7.582801	7.557610	7.664369	7.787968	7.824712	7.697642	6.790986	7.478437	7.115333	7.055638	7.696718	7.770751	7.099159	7.003807	8.043081	6.613100	7.037774	7.033624	6.805405	6.563857	6.308645	6.490743	6.072691	6.079633	6.100092	5.631293	5.970239
D116I	4	DHF	27.226318	26.666247	26.106250	25.538762	24.962297	24.360754	23.765231	23.184017	22.611474	22.015808	21.424634	20.852993	20.234241	19.657903	19.046796	18.430878	17.830163	17.227613	16.615740	16.019371	15.427834	14.831229	14.239293	13.653844	13.085012	12.507786	11.943206
D116I	4	velocity	6.495263	6.409999	6.588489	6.298247	6.715205	6.435774	6.890192	6.497866	6.953407	6.728675	6.687795	7.045682	6.865084	7.206045	7.272403	6.578053	6.520405	6.711405	7.091321	6.244317	6.897864	7.182680	7.095200	6.891457	6.481917	6.512750	5.918094
M42Y	1	DHF	45.614969	43.796013	41.882233	40.046084	38.223795	36.350729	34.480322	32.675974	30.933866	29.232524	27.557567	25.918265	24.326432	22.816077	21.368700	19.988917	18.689317	17.465208	16.308179	15.215206	14.184742	13.217339	12.306535	11.450113	10.649159	9.897682	9.200300	8.541199	7.938031
M42Y	1	velocity	14.871039	14.929875	15.740147	14.033613	14.883567	15.025781	14.845645	14.372020	13.607975	13.589799	13.286163	12.762856	12.303643	11.918461	11.399261	10.610470	10.024098	9.525688	8.950207	8.435871	7.903466	7.564641	6.971676	6.587484	6.264172	5.672760	5.483522	5.000564	4.727069
M42Y	2	DHF	45.524668	43.598697	41.654805	39.703254	37.825857	35.990508	34.193906	32.376512	30.545614	28.751940	27.008807	25.297362	23.625501	22.011829	20.468514	18.968180	17.539081	16.169638	14.865274	13.637613	12.466369	11.371086	10.343433	9.381101	8.485903
M42Y	2	velocity	16.093710	15.919211	16.622485	15.893792	15.316487	14.952655	14.623565	15.381648	15.060223	14.523899	14.352486	14.178538	13.616757	13.206465	12.747252	12.126432	11.484969	11.052471	10.484444	10.113375	9.389307	8.854666	8.202690	7.624015	7.337626
M42Y	3	DHF	45.841963	43.688258	41.633058	39.486220	37.414663	35.339843	33.299914	31.286327	29.257006	27.296674	25.332996	23.443147	21.646776	19.897375	18.238032	16.646427	15.154850	13.758034	12.443233	11.188952	10.041904	8.962661	7.963434	7.041682	6.210580
M42Y	3	velocity	18.144085	17.244682	16.680744	18.173747	17.309947	17.269512	16.848801	16.972135	16.738386	16.336446	16.033082	15.043695	15.149063	14.356421	13.590383	12.658877	11.993259	11.323121	10.599143	10.080559	9.467317	8.599098	7.757173	7.469264	6.659374
I41V	1	DHF	26.189788	25.356508	24.472562	23.568877	22.680368	21.808301	20.927830	20.029607	19.143635	18.266112	17.417706	16.588906	15.767348	14.936505	14.120530	13.310587	12.515038	11.742413	10.994086	10.277884	9.568964	8.901175	8.251654	7.639337
I41V	1	velocity	4.237796	4.493848	4.720134	4.700112	4.417768	4.670007	4.745205	4.650467	4.704553	4.511784	4.258786	4.208573	4.401047	4.312386	4.236692	4.284224	3.996548	3.994371	3.802465	3.705436	3.637673	3.438341	3.246077	3.154538
I41V	2	DHF	46.976727	46.185933	45.418528	44.597880	43.826592	43.032150	42.272999	41.534700	40.776742	40.040977	39.304429	38.580309	37.858909	37.156586	36.456961	35.778630	35.100339	34.447174	33.790717	33.151805	32.499831	31.895931	31.273043	30.636621	30.039465	29.439430	28.873827	28.348418	27.845160	27.410032	26.998410	26.499802	26.033888	25.562036	25.059570	24.635824	24.390327	24.179994	23.906403	23.490047	22.985453	22.494964	22.041945	21.606335	21.161421	20.756711	20.251029
I41V	2	velocity	4.261001	3.712444	4.229059	4.244020	3.989682	4.031307	3.967695	4.004256	3.921661	3.831414	3.933473	3.371753	3.670193	3.832196	3.658174	3.385396	3.638045	3.334504	3.404947	3.249125	3.191061	3.131030	3.162255	3.117208	3.248839	3.059753	2.701307	2.740173	2.430936	2.218111	2.146117	2.398944	2.517104	2.253696	1.901496	2.216752	0.785260	1.039069	2.342163	2.851649	2.637413	2.310322	2.145717	2.012602	2.650739	2.379433	2.845872
I41V	3	DHF	31.483634	30.091550	28.624364	27.006593	25.310735	23.782032	22.191477	20.512566	18.884850	17.328825	15.701334	14.140907	12.590413	11.159108	9.827664	8.581176	7.355984	6.261392	5.249743	4.361722
I41V	3	velocity	7.494068	7.169114	7.915998	8.923476	7.177061	8.032078	8.657311	8.257544	8.079364	8.348894	7.830501	7.687136	7.420933	6.843968	6.630367	6.502584	5.887338	5.480874	4.833266	4.234656
L24V	1	DHF	31.949800	30.574697	29.163523	27.809647	26.481664	25.158872	23.831611	22.554719	21.204082	19.845813	18.561560	17.317751	16.109552	14.981425	13.918536	12.921077	11.970526	11.062360	10.179255	9.334685	8.544044	7.802227	7.127419	6.512826	5.927501	5.385721	4.892932	4.440734	4.028687	3.647727	3.298405
L24V	1	velocity	11.464904	11.681157	11.924114	11.314636	11.016868	11.067955	10.850667	10.978726	11.192275	11.301481	10.433370	10.281949	9.583243	9.192560	8.598779	8.116189	7.722897	7.512155	7.009248	6.998554	6.389831	5.894201	5.392619	5.172778	4.647299	4.309436	3.861682	3.551604	3.183763	3.124532	2.845835
L24V	2	DHF	42.218743	40.977091	39.772257	38.571303	37.406114	36.218312	35.041927	33.867603	32.692365	31.520681	30.392381	29.278216	28.206735	27.158592	26.127112	25.121912	24.141408	23.193664	22.276377	21.366424	20.499775	19.678592	18.859007	18.098154	17.347409	16.632038	15.936711	15.277443	14.635013	14.024359	13.443694
L24V	2	velocity	10.536996	10.632366	10.163986	10.750301	10.152132	10.552583	10.518131	9.973186	10.265396	10.308597	9.971117	9.336215	9.186547	9.023536	8.816285	8.549291	8.326309	7.965267	7.920633	7.643724	7.364783	7.089371	6.770022	6.421463	6.078976	6.165027	5.801669	5.635844	5.306870	5.311721	5.048091
L24V	3	DHF	43.605566	42.286086	40.937521	39.556649	38.140763	36.748886	35.351086	33.994317	32.622927	31.294348	29.963904	28.683891	27.429630	26.206351	25.015185	23.863320	22.727941	21.633606	20.570033	19.522979	18.524166	17.547508	16.604693	15.693650	14.813120	13.971924	13.159060	12.387200	11.656301
L24V	3	velocity	11.144195	10.934774	11.619061	11.397572	11.483488	11.744745	11.548130	11.294512	11.304656	11.183527	10.834693	10.505771	10.385250	10.145996	9.677134	9.448670	9.243961	9.204713	8.956424	8.677049	8.262870	8.290534	7.741302	7.504930	6.986574	6.965013	6.585165	6.365850	6.162554
L24V	4	DHF	39.442533	37.873752	36.277854	34.638440	33.023947	31.396838	29.794573	28.180441	26.574992	24.963254	23.403471	21.845815	20.347011	18.876001	17.450601	16.079897	14.766725	13.505907	12.290816	11.149753
L24V	4	velocity	13.086041	13.250637	13.686751	13.721990	13.295492	13.443831	13.170584	13.499879	13.225580	13.434465	13.195570	12.683788	12.448257	11.823829	11.745108	11.196656	10.818606	10.276817	9.898874	9.211842
L62A	1	DHF	25.078230	24.571898	24.048102	23.522740	22.980408	22.463037	21.943060	21.427075	20.924470	20.431918	19.926007	19.431079	18.940517	18.461167	17.982846	17.508179	17.040817	16.576770	16.099030	15.662742	15.217655	14.780954	14.357332	13.931645	13.528072	13.129011	12.729574	12.337598	11.968857	11.602972	11.243614	10.895426	10.555511	10.229902	9.908370	9.596669	9.295020
L62A	1	velocity	3.335523	3.271185	3.366960	3.465465	3.705511	3.557270	3.300107	3.534440	3.154009	3.248138	3.337215	3.211015	3.308775	3.204831	3.069594	3.222809	3.079147	3.126339	3.011844	2.971089	2.876113	2.870551	2.683817	2.699592	2.659715	2.780762	2.460471	2.622907	2.476975	2.349014	2.362653	2.253628	2.170780	2.074849	2.111096	1.982802	1.952224
L62A	2	DHF	47.983248	47.691532	47.427597	47.145165	46.869546	46.582978	46.300638	46.055959	45.758233	45.469707	45.170401	44.906413	44.625001	44.322304	44.034415	43.782527	43.525870	43.235832	42.965675	42.695940	42.410798	42.148671	41.869855	41.577727	41.310878	41.051495	40.758831	40.493240	40.214219	39.962757	39.689521	39.420682	39.145463	38.912151	38.634394	38.400627	38.142803	37.898630	37.639093	37.388541	37.137944	36.905962	36.654936	36.407063	36.190055	36.006418	35.757095
L62A	2	velocity	1.998202	2.043719	1.922791	1.891875	1.826869	1.768947	1.945195	2.095500	2.245372	1.850546	1.938491	1.595772	2.054982	1.905132	1.800417	2.091373	1.836300	1.842371	1.838879	1.455661	1.741708	1.706537	1.648589	1.611658	1.887218	2.016202	1.715823	1.682107	1.941870	1.977992	2.104967	1.729106	1.391294	1.824482	1.558126	1.716249	1.596498	1.418244	1.531071	1.654536	1.535022	1.451079	1.658768	1.623050	0.993773	1.572600	1.298004
L62A	3	DHF	40.034428	39.498140	38.942131	38.406174	37.851341	37.298307	36.733101	36.182383	35.630051	35.073035	34.527895	33.979178	33.431650	32.887971	32.353287	31.822282	31.299326	30.779686	30.265553	29.754326	29.259164	28.761127	28.276459	27.802850	27.331074	26.866960	26.409593	25.963780	25.522771	25.088915	24.656195	24.244009	23.820376	23.412567	23.003475	22.605057	22.216949	21.834527	21.453699	21.086341	20.720334	20.361028	20.013709	19.671744	19.353768	19.042267	18.735582
L62A	3	velocity	3.673294	3.587218	3.566388	3.596750	3.595689	3.671196	3.749025	3.883272	3.687070	3.680783	3.707686	3.487591	3.689006	3.501804	3.559661	3.476106	3.446307	3.383587	3.340263	3.344516	3.185693	3.141411	3.057228	3.076063	3.018735	3.081562	2.891320	2.850191	2.862940	2.888620	2.802763	2.722741	2.709997	2.709874	2.656561	2.597589	2.542489	2.478178	2.343101	2.358260	2.466677	2.316085	2.280126	2.170179	2.132734	1.947218	1.911038
W47V	1	DHF	26.807948	26.465032	26.119890	25.771942	25.424216	25.063421	24.708126	24.351516	23.987536	23.626987	23.274425	22.902248	22.548946	22.180778	21.831264	21.473635	21.123104	20.766067	20.419534	20.075118	19.733217	19.394189	19.059201	18.728549	18.402396	18.080068	17.765199	17.453008	17.139801	16.828333	16.524791	16.230096	15.935626	15.646933	15.364707	15.087707	14.816821	14.545189	14.279663	14.027639	13.768514	13.518693	13.272064	13.028649	12.786194	12.549323	12.311778
W47V	1	velocity	3.241259	3.272396	3.141897	3.150824	3.197737	3.450717	3.452404	3.353354	3.273757	3.446467	3.376326	3.335353	3.327790	3.342728	3.132743	3.305831	3.400234	3.328725	3.376204	3.073605	3.263062	3.107146	3.202738	3.103291	3.098310	2.977652	2.900082	2.998623	2.811274	2.758592	2.749655	2.660453	2.747760	2.568877	2.517160	2.452597	2.387635	2.498347	2.406626	2.330958	2.368609	2.266490	2.361381	2.294677	2.300771	2.248952	2.150634
W47V	2	DHF	48.669748	47.979370	47.291312	46.602036	45.900970	45.191138	44.498526	43.809137	43.111836	42.428344	41.765700	41.112073	40.466719	39.831540	39.176035	38.566955	37.959510	37.385107	36.797579	36.238117	35.662851	35.101390	34.557957	34.011502	33.464061	32.895231	32.332793	31.774637	31.217203	30.659954	30.118414	29.579500	29.063155	28.545226	28.038595	27.551214	27.062996	26.587264	26.117984	25.738081	25.347803	24.884815	24.399008	23.957765	23.536755	23.174410	22.879751
W47V	2	velocity	3.503794	3.331665	3.487023	3.391084	3.664874	3.578674	3.286105	3.346012	3.359462	3.313359	3.233377	3.132393	3.045965	3.245855	3.035940	3.029646	2.769392	2.916268	2.796757	2.873268	2.833748	2.755200	2.644550	2.680768	2.800206	2.840398	2.782962	2.771764	2.719003	2.667725	2.677932	2.769383	2.634522	2.554438	2.490498	2.445783	2.345068	2.224302	2.251743	1.589269	2.308890	2.216613	2.317607	2.106626	1.979823	1.653179	1.097713
W47V	3	DHF	39.866519	39.483289	39.080258	38.678895	38.272293	37.869437	37.453162	37.069110	36.669625	36.284992	35.901233	35.520478	35.170968	34.788952	34.384746	34.014256	33.669477	33.312683	32.946450	32.562130	32.194462	31.844508	31.483357	31.134797	30.802971	30.456356	30.129012	29.801505	29.473244	29.150910	28.842899	28.531275	28.229645	27.922962	27.623054	27.321254	27.029590	26.742254	26.446592	26.158740	25.872802	25.583843	25.294923	25.006385	24.723476	24.438546	24.158939
W47V	3	velocity	3.971717	3.845544	4.061649	3.849206	3.997272	3.775600	4.310303	4.021400	3.905571	3.941881	3.862857	2.974478	3.653206	4.179147	3.534650	3.727990	3.167670	3.577524	3.786818	3.908686	3.597598	3.531103	3.467901	3.480485	3.240445	3.277956	3.208303	3.271681	3.003181	3.263313	2.912830	3.092867	2.966021	3.076584	2.927765	2.991847	3.024068	2.733461	2.914032	2.971280	2.894238	2.822330	2.657815	2.738650	2.749029	2.879922	2.745840
W47L	1	DHF	45.087348	44.569348	44.063434	43.549005	43.049495	42.553636	42.047897	41.515960	40.996982	40.426006	39.824355	39.313568	38.778450	38.237127	37.672805	37.136827	36.578908	36.047006	35.502064	34.964337	34.417102	33.852692	33.308383	32.758860	32.197484	31.637938	31.078844	30.514038	29.948015	29.371578	28.835608	28.268660	27.718795	27.160282	26.609979	26.075176	25.534986	25.009577	24.482015	23.960287	23.454931	22.958876	22.448899	21.959623	21.481150	21.011554	20.548074
W47L	1	velocity	2.646716	2.445073	2.529648	2.297013	2.141995	2.072035	1.740811	2.252308	2.364854	2.373408	2.127179	2.143596	2.240665	2.439886	2.340158	2.117902	2.255828	2.280603	2.133998	2.246843	2.353458	2.304058	2.339604	2.310617	2.412733	2.426365	2.274101	2.494608	2.371656	2.487688	2.320818	2.208532	2.346835	2.212316	2.293379	2.240103	2.201156	2.246106	2.137609	2.149533	2.265841	2.097970	1.986988	2.091687	1.973816	1.923453	1.883661
W47L	2	DHF	44.802940	44.195551	43.610807	43.063428	42.570940	42.052510	41.511980	40.986082	40.460474	39.953187	39.442905	38.942316	38.428250	37.925332	37.381309	36.844508	36.331261	35.764286	35.239302	34.728762	34.198182	33.681652	33.164746	32.678776	32.152436	31.622242	31.109841	30.598499	30.085416	29.575631	29.073889	28.576327	28.074187	27.596913	27.108625	26.627078	26.157435	25.675917	25.215392	24.768621	24.306619	23.860145	23.421058	22.983630	22.560516	22.120821	21.716604
W47L	2	velocity	2.417888	2.839477	2.330818	2.239973	2.104807	2.435552	2.317276	2.293423	2.064370	2.141785	2.070552	2.297577	2.197965	2.322934	2.149495	2.181307	2.281057	2.231678	2.258995	2.292468	2.392358	2.192418	2.138342	2.112983	2.192821	2.199134	2.054115	2.041386	2.359426	2.187080	1.995460	2.061202	2.067925	2.004734	2.120752	2.017770	1.998344	2.068712	1.961927	1.699302	1.888411	1.965528	1.894933	1.835236	1.770644	1.808595	1.790414
W47L	3	DHF	25.496877	24.855629	24.185969	23.528939	22.908829	22.298069	21.633715	20.983317	20.323252	19.657857	18.949106	18.186321	17.438103	16.671354	15.955195	15.243781	14.516368	13.775235	13.097053	12.437139	11.797417	11.177504	10.562429	9.971241	9.396248	8.845343	8.311501	7.796623	7.313078	6.830705
W47L	3	velocity	2.351095	2.329858	2.482756	2.362693	2.128768	2.364673	2.410883	2.470704	2.421785	2.497099	2.789999	2.848888	2.932256	2.861946	2.536807	2.554209	2.777804	2.566907	2.348245	2.293575	2.447856	2.288652	2.199125	2.103052	2.020222	2.032271	1.885029	1.830121	1.757752	1.664302
W47L	4	DHF	27.303218	26.413242	25.505592	24.606505	23.717103	22.873412	22.055486	21.199869	20.287895	19.367555	18.443949	17.475867	16.533211	15.634521	14.773499	13.943393	13.107247	12.312134	11.555512	10.830679	10.135590	9.474102	8.843860	8.241795	7.669073
W47L	4	velocity	3.275147	3.261390	3.321913	3.324070	3.194011	3.129608	2.886274	3.365024	3.399358	3.414739	3.567526	3.594654	3.387762	3.216180	3.215688	3.138381	3.039871	2.882518	2.722489	2.681735	2.533795	2.494208	2.236793	2.180982	2.064049
W47L	5	DHF	36.434875	34.712061	33.013378	31.231998	29.423641	27.672704	26.025544	24.433996	22.851349	21.423730	20.088531	18.869897	17.685778	16.533675	15.476006	14.474365	13.489748	12.597635	11.739457	10.931359	10.178230	9.441891	8.803882	8.145672
W47L	5	velocity	3.846981	3.813466	3.876542	3.708452	4.115378	3.761907	3.638490	3.463600	3.263328	3.078617	2.803573	2.774492	2.589473	2.349705	2.419279	2.129850	1.960422	2.002724	1.824925	1.831603	1.586051	1.442308	1.514701	1.344830
H114V	1	DHF	27.354085	26.593134	25.831012	24.970213	24.106009	23.351733	22.594166	21.861548	21.114753	20.373113	19.622804	18.810281	17.995652	17.188602	16.367312	15.570371	14.772881	13.980827	13.213540	12.469499	11.728741	10.969851	10.250321	9.558988	8.889988	8.254561	7.638106	7.034711	6.467907	5.917301
H114V	1	velocity	5.746148	6.026200	6.101873	6.777339	6.362298	5.916191	5.872478	5.759235	6.091048	5.690849	6.129130	6.228194	6.310241	6.260410	6.164215	6.130065	6.291319	5.965323	5.714071	5.675473	5.896266	5.921127	5.213319	5.263501	5.018699	4.922416	4.685289	4.815758	4.515920	4.125295
H114V	2	DHF	38.787936	36.919086	35.107625	33.323050	31.581910	29.877026	28.174795	26.537042	24.939550	23.345388	21.818127	20.334127	18.903728	17.520777	16.174461	14.871721	13.620727	12.440099	11.324530	10.267934
H114V	2	velocity	8.327236	8.400415	8.273756	8.339951	7.858920	7.939027	7.782611	7.651584	7.485839	7.304722	7.011704	6.728776	6.605931	6.443961	6.195094	5.991004	5.707599	5.231581	4.981375	4.806498
H114V	3	DHF	47.554677	46.779992	46.011407	45.237681	44.456126	43.662003	42.878507	42.077783	41.287734	40.521454	39.732925	38.956058	38.175088	37.387438	36.620981	35.862577	35.108318	34.358156	33.619700	32.901858	32.177607	31.463459	30.767632	30.062144	29.384956	28.723529	28.059736	27.422684	26.777375	26.147088	25.538473	24.934201	24.344555	23.768493	23.205213	22.644420	22.094229	21.555693	21.031442	20.520718	20.013607	19.530246	19.050083	18.584575	18.130779	17.675518	17.243081
H114V	3	velocity	6.219716	5.996255	6.161970	6.309707	6.266973	6.048560	5.838683	6.170717	6.132224	5.932121	5.911874	6.071263	5.999286	6.103545	5.944149	5.766663	5.921426	5.443778	5.526276	5.808459	5.511032	5.568104	5.308281	5.246494	5.085587	5.141379	5.087271	4.858266	5.057610	4.723066	4.745077	4.518276	4.486161	4.167344	4.303407	4.311028	3.875261	3.999618	4.040196	3.983358	3.764276	3.855339	3.941050	3.543089	3.576629	3.347023	3.156873
H114V	4	DHF	33.461091	32.643117	31.807352	30.974854	30.136641	29.313166	28.452586	27.629545	26.777220	25.949868	25.142673	24.316069	23.509548	22.695385	21.882649	21.096511	20.299377	19.531157	18.769303	18.013754	17.265985	16.537380	15.829728	15.109248	14.430362	13.760607	13.099856	12.464544	11.828282	11.231210	10.634576	10.055320	9.499282	8.964164	8.434821
H114V	4	velocity	6.619454	6.284766	6.384726	6.542666	6.749280	6.711940	6.660818	6.263926	6.166331	6.232023	6.600292	5.891945	6.217728	6.120055	5.964476	5.874421	6.240955	6.056055	5.855470	5.688863	5.848181	5.400517	5.611507	5.190743	5.491279	5.218624	4.956798	4.905124	4.984605	4.484884	4.622755	4.330030	4.164806	4.102275	3.999694
WT	1	DHF	32.268886	31.214705	30.116034	29.007307	27.911889	26.845936	25.772375	24.711034	23.633178	22.583025	21.558611	20.573899	19.585137	18.635110	17.665549	16.742480	15.839756	14.941089	14.067034	13.215906	12.392650	11.586427	10.839859	10.095111	9.341925	8.651201	7.980029	7.357585
WT	1	velocity	5.247792	5.609100	5.888134	5.732634	5.645685	5.566986	5.541599	5.658572	5.596371	5.377435	5.362671	5.161137	5.096737	4.944589	4.947597	4.779251	4.689680	4.557889	4.524965	4.431676	4.194571	4.093930	3.949167	3.731982	3.698670	3.186163	3.752346	3.318465
WT	2	DHF	24.047917	23.197190	22.349716	21.499646	20.662054	19.837486	19.021633	18.191938	17.384799	16.610675	15.848424	15.131204	14.415475	13.743600	13.099898	12.470299	11.763902	11.174306	10.600761	10.005451	9.471993	8.948150	8.430341	7.973732	7.527224	7.061171	6.644802	6.245150	5.886461	5.502514	5.184508	4.888596	4.578952	4.301882	4.030526
WT	2	velocity	4.547271	4.161466	4.297751	4.145613	4.081496	4.219048	4.146351	4.260506	4.196999	3.898494	3.923285	3.624507	3.558820	3.571985	3.310672	3.243253	3.119466	2.522480	2.959420	2.992678	2.801940	2.449005	2.579181	2.153880	2.099323	1.912283	2.439530	1.511567	1.743453	1.752915	1.692058	0.964581	1.620803	1.024010	1.124470
WT	3	DHF	23.806735	22.627429	21.424871	20.235621	19.058622	17.904008	16.760236	15.655621	14.566831	13.496330	12.463743	11.469328	10.506959	9.570902	8.679622	7.838009	7.038682	6.287247	5.582843	4.935277	4.340010	3.792286	3.303411	2.865417	2.476082	2.138678	1.851615	1.596865
WT	3	velocity	5.989315	5.995293	5.959130	5.986667	6.048103	5.726694	5.795876	5.489641	5.588599	5.301339	5.152904	4.904295	4.776324	4.624780	4.495129	4.216434	3.878163	3.664099	3.439300	3.239709	2.910887	2.610901	2.343969	2.090749	1.865752	1.538631	1.397778	1.176966
D116M	1	DHF	26.109829	25.355545	24.626995	23.901234	23.161583	22.420822	21.696592	20.978077	20.279650	19.577294	18.888012	18.191330	17.499990	16.788232	16.074110	15.359390	14.649826	13.938937	13.246540	12.580764	11.915461	11.264067	10.599640
D116M	1	velocity	8.652383	8.005213	8.042490	8.557831	8.886969	8.961535	8.339384	8.003376	7.568336	8.234384	7.753382	7.796677	7.674413	7.888818	8.148984	7.962980	7.818769	7.677294	7.752195	7.764423	7.645143	7.507011	7.960772
D116M	2	DHF	39.594147	38.824732	38.043011	37.251497	36.453666	35.661291	34.912940	34.112102	33.360288	32.567663	31.764987	30.982813	30.164095	29.364356	28.554117	27.773511	26.966716	26.140329	25.349348	24.525366	23.753831	22.933922	22.152184	21.347354	20.555046	19.759319	18.973232	18.206458	17.478187	16.724164	15.988130	15.276085	14.571521	13.891886	13.202874	12.540326	11.907151	11.274998	10.652327	10.053304
D116M	2	velocity	9.433481	8.979115	9.210387	9.229672	8.929609	9.022508	9.339244	8.767537	8.831237	8.585941	8.407670	8.895088	8.944058	8.476952	8.864476	9.441968	8.621179	9.331326	9.110949	9.311805	9.449967	8.418261	9.149698	8.864930	9.281387	9.084450	9.247002	8.497535	8.217234	8.358380	8.424541	8.525929	8.011002	7.972386	7.810258	7.450349	6.945714	6.961186	7.001346	7.043740
D116M	3	DHF	50.244132	49.640504	49.010333	48.368736	47.739233	47.077104	46.368619	45.672648	44.968474	44.242199	43.563863	42.865626	42.179342	41.501168	40.828796	40.141562	39.463521	38.775643	38.124492	37.448249	36.792810	36.145375	35.477713	34.806967	34.171285	33.494785	32.863947	32.239427	31.599949	30.943713	30.317569	29.697963	29.095672	28.470757	27.891423	27.281234	26.705809	26.126219	25.539439	24.983802	24.408179	23.859441	23.298713	22.741593	22.218410	21.675177	21.144334
D116M	3	velocity	7.072673	7.734127	7.184400	7.285555	7.851408	7.473951	7.711687	8.697987	7.409414	8.345991	8.181117	8.418315	7.515530	7.815474	7.538711	7.741072	8.252200	7.796006	7.991702	7.400285	7.454814	8.019598	7.241438	7.719883	7.613098	7.167688	7.253460	7.859453	6.922525	7.110396	6.843544	6.595999	6.958527	7.243105	6.948247	6.987695	6.713695	6.648307	6.522877	6.470643	6.333794	6.320985	6.787123	6.245274	6.034796	5.839713	5.586491
D116M	4	DHF	33.109377	32.468941	31.811441	31.152461	30.490532	29.856006	29.163655	28.499066	27.802937	27.144359	26.492732	25.806933	25.171110	24.475723	23.803995	23.147172	22.486165	21.832779	21.167536	20.533437	19.890459	19.256311	18.634995	18.018323	17.404226	16.806810	16.211391	15.636299	15.056793	14.477435	13.922724	13.383489	12.840071	12.311222	11.797071	11.279696	10.779366	10.289925
D116M	4	velocity	7.795454	7.881445	7.758780	7.615069	7.439781	7.578977	7.601409	7.687901	7.971787	7.776174	7.629183	7.913404	7.105345	7.332527	7.914914	7.243478	7.593157	7.461359	7.110835	7.524697	7.176027	7.389700	7.043651	6.839258	6.747660	6.995381	6.611413	6.798095	6.596611	6.186814	6.367557	6.111226	6.032271	6.461405	5.885651	5.601544	6.049713	5.573517
W30M	1	DHF	36.932636	35.601763	32.036026	30.673302	29.347464	28.171702	27.065749	25.988745	24.924292	23.891855	22.866301	21.834626	20.829481	19.843611	18.904360	17.979408	17.098201	16.255205	15.444307	14.672949	13.928777	13.222476	12.552890	11.924694	11.334247	10.765584	10.236336	9.733000	9.250472	8.807320	8.379051	7.979830	7.602323	7.248320	6.911330
W30M	1	velocity	10.180115	10.283258	10.184829	10.731718	9.473378	8.688081	8.444013	8.079183	7.971527	8.089080	7.892302	7.670668	7.783112	7.358734	7.178445	6.707947	6.687369	6.321244	6.311427	5.979320	5.719075	5.235897	5.040862	4.577700	4.268027	4.098388	3.866120	3.689267	3.609180	3.287997	3.128654	2.914745	2.738780	2.602874	2.511335
W30M	2	DHF	40.396224	39.047306	37.713227	36.369313	35.047879	33.716338	32.385477	31.083537	29.786220	28.528727	27.276297	26.056651	24.872339	23.703820	22.564202	21.468244	20.393703	19.369752	18.357581	17.392378	16.461039	15.574296	14.708233	13.886291	13.080111	12.331107	11.596917	10.909247
W30M	2	velocity	10.454000	10.308521	10.510208	10.182507	10.224322	10.217510	10.273340	10.038070	9.892298	9.677585	9.599419	9.088679	9.105505	8.891653	8.469361	8.197217	7.957436	8.095755	7.587078	7.277620	7.031364	6.820582	6.571013	6.285278	5.925043	5.716571	5.427160	5.132432
[truncated: 172 more columns]
